# Supplementary material for: Asymmetric Büchner reaction and arene cyclopropanation via copper-catalyzed controllable cyclization of diynes
Source: PubMed Central journal article supplement — Nat Commun. 2024 Oct 25;15:9227. doi: 10.1038/s41467-024-53605-7 (PMC11511906; doi:10.1038/s41467-024-53605-7), 2024-10-25
Supplement: 41467_2024_53605_MOESM1_ESM.pdf [file 41467_2024_53605_MOESM1_ESM.pdf]

## Supplementary Information

### **Asymmetric Büchner reaction and arene cyclopropanation via copper-catalyzed controllable cyclization of diynes**

Yan-Xin Zheng,<sup>1,†</sup> Li-Gao Liu,<sup>2,†</sup> Tian-Qi Hu,<sup>1</sup> Xiao Li,<sup>1</sup> Zhou Xu,<sup>3</sup> Xin Hong,<sup>\*1,2</sup> Xin Lu,<sup>1</sup> Bo Zhou,<sup>1</sup> and Long-Wu Ye<sup>\*1,4</sup>

<sup>1</sup>State Key Laboratory of Physical Chemistry of Solid Surfaces, Key Laboratory of Chemical Biology of Fujian Province, and College of Chemistry and Chemical Engineering, Xiamen University, Xiamen 361005, China

E-mail: longwuye@xmu.edu.cn

<sup>2</sup>Center of Chemistry for Frontier Technologies, Department of Chemistry, State Key Laboratory of Clean Energy Utilization, Zhejiang University, Hangzhou 310027, China.

E-mail: hxchem@zju.edu.cn

<sup>3</sup>Jiangsu Key Laboratory of New Drug Research and Clinical Pharmacy, School of Pharmacy, Xuzhou Medical University, Xuzhou, 221004, China

<sup>4</sup>State Key Laboratory of Organometallic Chemistry, Shanghai Institute of Organic Chemistry, Chinese Academy of Sciences, Shanghai 200032, China

<sup>†</sup>These authors contributed equally to this work.

| <b>Content</b>                                                                       | <b>Page Number</b> |
|--------------------------------------------------------------------------------------|--------------------|
| <b>1. General Information</b>                                                        | 2                  |
| <b>2. More Reaction Conditions, Scope and Mechanism Studies</b>                      | 3                  |
| <b>3. Preparation of Starting Materials</b>                                          | 9                  |
| <b>4. General Procedures for Copper-Catalyzed Controllable Cyclization of Diynes</b> | 60                 |
| <b>5. Synthetic Utility Study</b>                                                    | 112                |
| <b>6. Crystal Data</b>                                                               | 119                |
| <b>7. Computational Studies</b>                                                      | 122                |
| <b>8. HPLC Chromatograms</b>                                                         | 125                |
| <b>9. NMR Spectra</b>                                                                | 201                |

## 1. General Information

Ethyl acetate (ACS grade), hexanes (ACS grade), anhydrous 1,2-dichloroethane (ACS grade) and toluene (ACS grade) were obtained commercially and used without further purification. Methylene chloride, tetrahydrofuran and diethyl ether were purified according to standard methods unless otherwise noted. Commercially available reagents were used without further purification. Reactions were monitored by thin layer chromatography (TLC) using silicycle pre-coated silica gel plates. Flash column chromatography was performed over silica gel (300-400 mesh). Infrared spectra were recorded on a Nicolet AVATER FTIR330 spectrometer as thin film and are reported in reciprocal centimeter ( $\text{cm}^{-1}$ ). Mass spectra were recorded with Micromass QTOF2 Quadrupole/Time-of-Flight Tandem mass spectrometer using electron spray ionization.

$^1\text{H}$  NMR spectra and  $^{13}\text{C}$  NMR spectra were recorded on a Bruker AV-400 spectrometer or a Bruker AV-500 or a Bruker AV-600 spectrometer in chloroform- $\text{d}_3$ . For  $^1\text{H}$  NMR spectra, chemical shifts are reported in ppm with the internal TMS signal at 0.0 ppm as a standard. For  $^{13}\text{C}$  NMR spectra, chemical shifts are reported in ppm with the internal chloroform signal at 77.0 ppm as a standard. The data is being reported as (s = singlet, d = doublet, t = triplet, q = quartet, m = multiplet or unresolved, coupling constant(s) in Hz, integration).

Enantiomeric excesses (ee) were determined by an UltiMate 3000 chiral HPLC. The chiral columns used for the determination of enantiomeric excesses by chiral HPLC were Chiralpak columns (IA, IB, IC, IE, IG, AD-H). The particle size is 5  $\mu\text{m}$  and dimensions is 4.6 mm I.D \* 250 mm L.

## 2. More Reaction Conditions, Scope and Mechanism Studies

**Table S1.** Optimization of reaction conditions for asymmetric Büchner reaction of *N*-propargyl ynamide **1a**.<sup>a</sup>

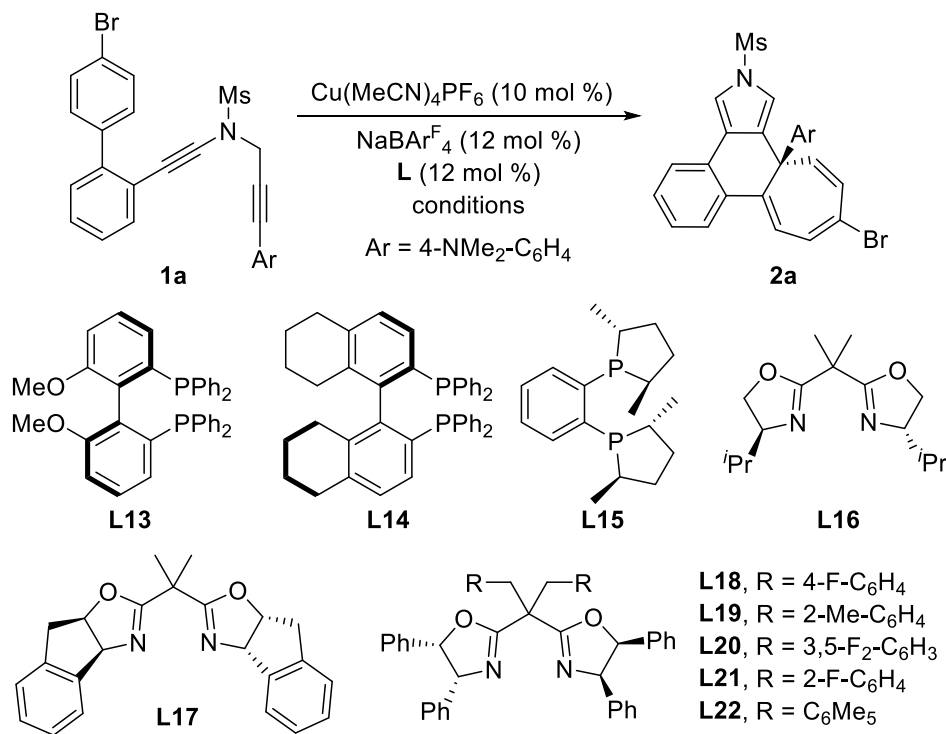

| entry | L          | conditions                       | yield (%) <sup>b</sup> | ee (%) <sup>c</sup> |
|-------|------------|----------------------------------|------------------------|---------------------|
| 1     | <b>L12</b> | DCM, 35 °C, 0.5 h                | 66                     | 15                  |
| 2     | <b>L13</b> | DCM, 35 °C, 0.5 h                | 93                     | 18                  |
| 3     | <b>L14</b> | DCM, 35 °C, 3 h                  | 91                     | 29                  |
| 4     | <b>L15</b> | DCM, 35 °C, 1 h                  | 27                     | 17                  |
| 5     | <b>L16</b> | DCM, 35 °C, 0.5 h                | 72                     | <5                  |
| 6     | <b>L17</b> | DCM, 35 °C, 0.5 h                | 54                     | <5                  |
| 7     | <b>L18</b> | DCM, 35 °C, 0.5 h                | 57                     | 22                  |
| 8     | <b>L19</b> | DCM, 35 °C, 1 h                  | 69                     | 29                  |
| 9     | <b>L20</b> | DCM, 35 °C, 0.5 h                | 78                     | 12                  |
| 10    | <b>L21</b> | DCM, 35 °C, 0.5 h                | 81                     | 41                  |
| 11    | <b>L22</b> | DCM, 35 °C, 0.5 h                | 90                     | 63                  |
| 12    | <b>L12</b> | CHCl <sub>3</sub> , 35 °C, 0.5 h | 75                     | 43                  |
| 13    | <b>L12</b> | PhCl, 35 °C, 0.5 h               | 71                     | 72                  |
| 14    | <b>L12</b> | PhCF <sub>3</sub> , 35 °C, 0.5 h | 62                     | 75                  |
| 15    | <b>L12</b> | <i>o</i> -xylene, 35 °C, 0.5 h   | 69                     | 78                  |

<sup>a</sup>Reaction conditions: **2a** (0.05 mmol),  $\text{Cu}(\text{MeCN})_4\text{PF}_6$  (0.005 mmol), **L** (0.006 mmol),  $\text{NaBAR}_4^{\text{F}}$  (0.006 mmol), DCM (1 mL), 35 °C, in Schlenk tubes.

<sup>b</sup>Measured by <sup>1</sup>H NMR using diethyl phthalate as internal standard.

<sup>c</sup>Determined by HPLC analysis.

**Table S2.** Optimization of reaction conditions for asymmetric arene cyclopropanation reaction of *N*-propargyl ynamide **3a**.<sup>a</sup>

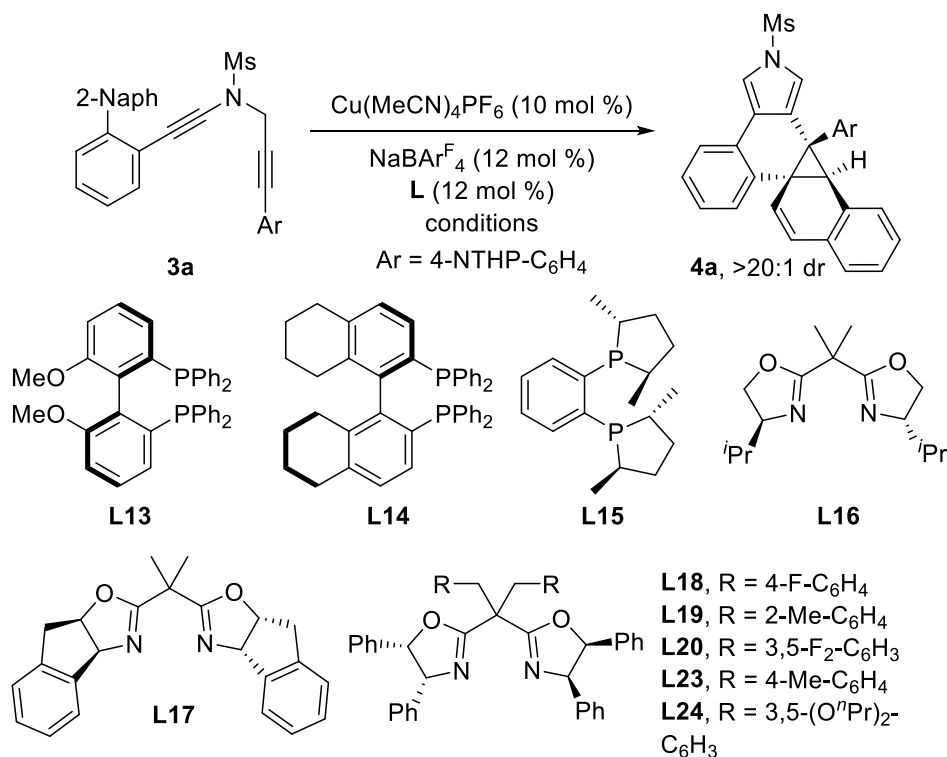

| entry | L          | conditions                       | yield (%) <sup>b</sup> | ee (%) <sup>c</sup> |
|-------|------------|----------------------------------|------------------------|---------------------|
| 1     | <b>L8</b>  | DCM, 35 °C, 0.5 h                | 78                     | 90                  |
| 2     | <b>L13</b> | DCM, 35 °C, 0.5 h                | 57                     | 20                  |
| 3     | <b>L14</b> | DCM, 35 °C, 0.5 h                | 69                     | 68                  |
| 4     | <b>L15</b> | DCM, 35 °C, 0.5 h                | 54                     | <5                  |
| 5     | <b>L16</b> | DCM, 35 °C, 0.5 h                | 51                     | <5                  |
| 6     | <b>L17</b> | DCM, 35 °C, 0.5 h                | 39                     | 38                  |
| 7     | <b>L18</b> | DCM, 35 °C, 0.5 h                | 48                     | 92                  |
| 8     | <b>L19</b> | DCM, 35 °C, 0.5 h                | 69                     | 89                  |
| 9     | <b>L20</b> | DCM, 35 °C, 0.5 h                | 79                     | 91                  |
| 10    | <b>L23</b> | DCM, 35 °C, 0.5 h                | 72                     | 91                  |
| 11    | <b>L24</b> | DCM, 35 °C, 0.5 h                | 84                     | 91                  |
| 12    | <b>L12</b> | DCE, 35 °C, 0.5 h                | 51                     | 82                  |
| 13    | <b>L12</b> | CHCl <sub>3</sub> , 35 °C, 0.5 h | 79                     | 91                  |
| 14    | <b>L12</b> | PhCl, 35 °C, 0.5 h               | 54                     | 78                  |
| 15    | <b>L12</b> | <i>o</i> -xylene, 35 °C, 0.5 h   | 81                     | 92                  |

<sup>a</sup>Reaction conditions: **4a** (0.05 mmol), Cu(MeCN)<sub>4</sub>PF<sub>6</sub> (0.005 mmol), **L** (0.006 mmol), NaBAR<sub>4</sub><sup>F</sup> (0.006 mmol), DCM (1 mL), 35 °C, in Schlenk tubes.

<sup>b</sup>Measured by <sup>1</sup>H NMR using diethyl phthalate as internal standard.

<sup>c</sup>Determined by HPLC analysis.

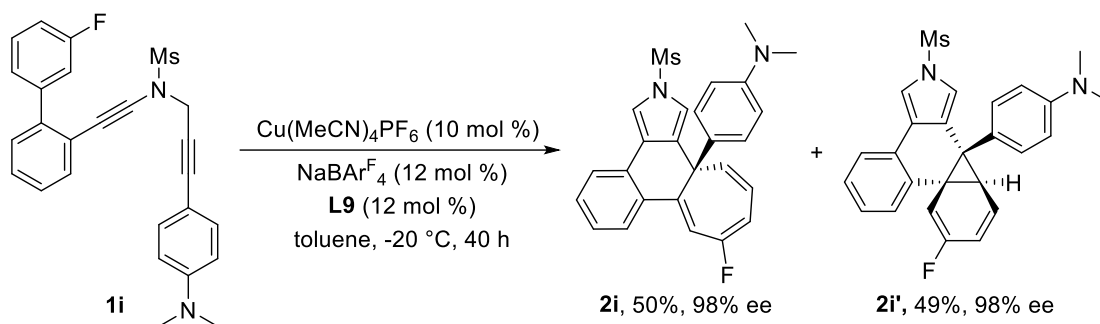

**Fig. S1.** The use of diene **1i** possessing a *meta*-fluoro-substituent at the biaryl moiety led to the desired Büchner reaction product **2i** (50%, 98% ee) and arene cyclopropanation product **2i'** (49%, 98% ee), respectively.

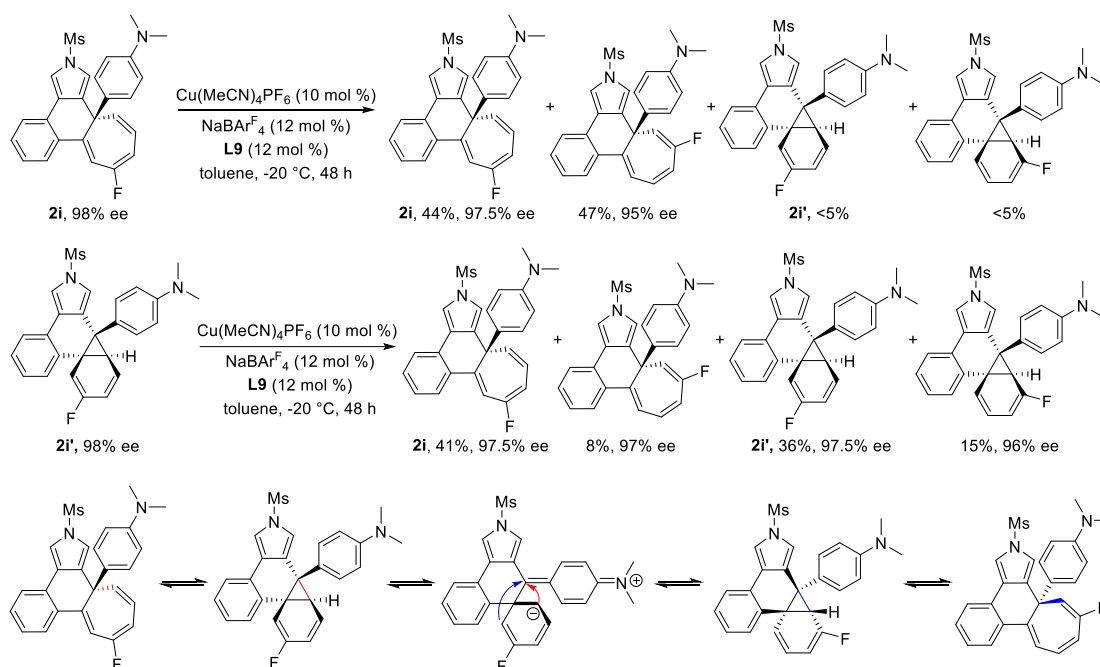

**Fig. S2.** Control experiments showed that the conversion of seven-membered Büchner cyclization product **2i** into arene cyclopropanation product **2i'** was very slowly (<5%, 48 h) under the standard reaction conditions, while the conversion of **2i'** into **2i** was relatively fast (41%, 48 h) under the standard conditions, and the enantioselectivity was almost maintained during this process. In particular, the formation of the corresponding regioisomers of **2i** and **2i'** could be observed in this *meta*-fluoro-substituted diene substrate probably due to the above process.

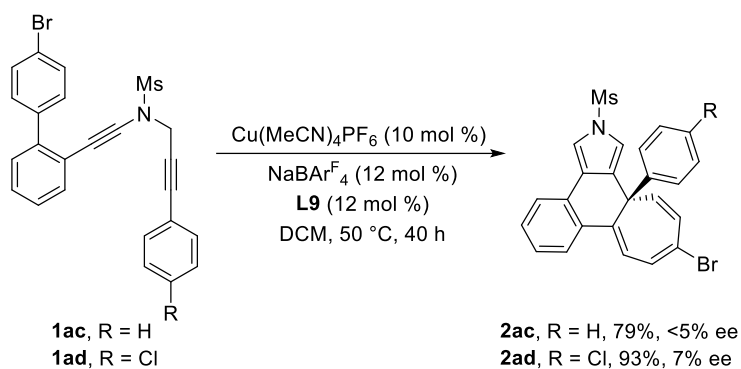

**Fig. S3.** Our attempts to extend the reaction to diynes with non-electron-rich groups **1ac** and **1ad** only led to low enantioselectivities (<10% ee).

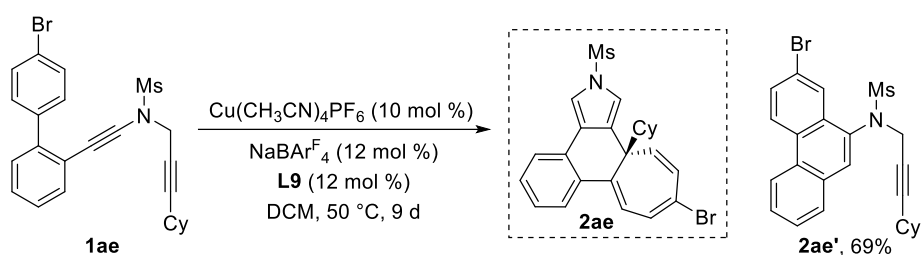

**Fig. S4.** Our attempts to extend the reaction to Cy-substituted diene **1ae** failed to obtain the corresponding Büchner product, and instead a hydroarylation product was isolated in 69% yield.

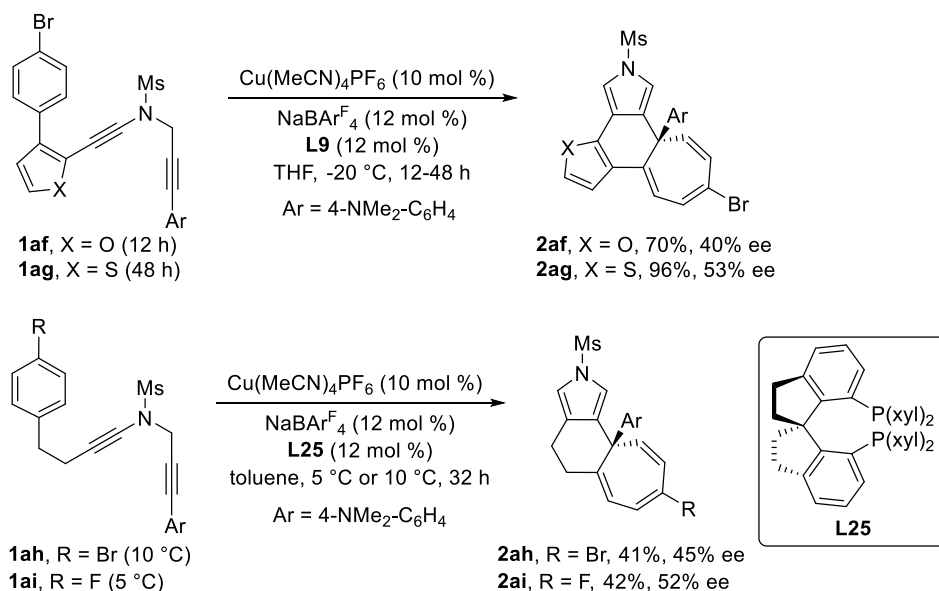

**Fig. S5.** The reaction proceeded smoothly with the heteroatomic diynes **1af–1ag** and the alkyl-linked aryl diynes **1ah–1ai**, but only gave the desired cycloheptatrienes **2af–2ai** with moderate enantioselectivities (40–53% ees) under the optimized conditions.

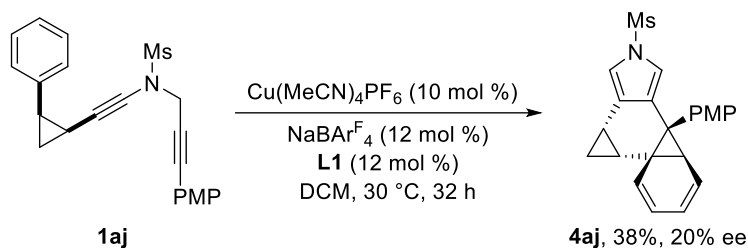

**Fig. S6.** Attempts to extend the reaction to the cyclopropyl-linked aryl diyne **1aj** only led to the formation of the corresponding cyclopropane **4aj** in 38% yield with 20% ee.

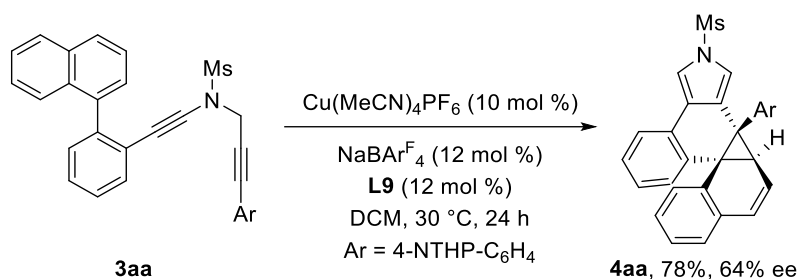

**Fig. S7.** Our attempts to extend the reaction to the 1-naphthyl diyne **3aa** only led to the corresponding cyclopropane product **4aa** with moderate enantioselectivity (64% ee).

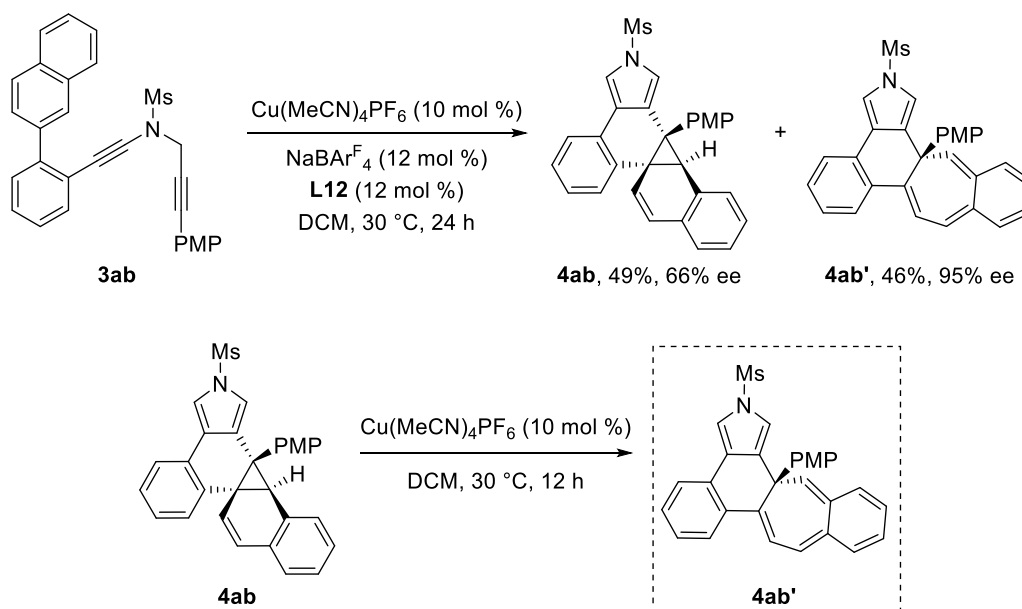

**Fig. S8.** The reaction of PMP-substituted 2-naphthyl diyne **3ab** only led to a mixture of cyclopropanation product **4ab** (49%, 66% ee) and Büchner product **4ab'** (46%, 95% ee). Of note, **4ab** could not be further converted into **4ab'**.

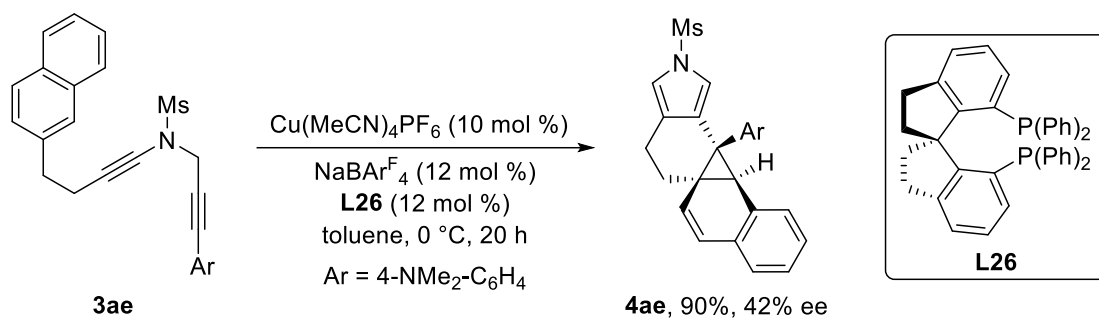

**Fig. S9.** The use of the alkyl-linked naphthyl-diyne **3ae** only led to the desired benzonorcaradiene **4ae** (90%) with 42% ee under the optimized reaction conditions.



### 3. Preparation of Starting Materials

#### 3.1. General Procedure S1 for Synthesis of *N*-propargyl Ynamides **1** and **3**<sup>1</sup>

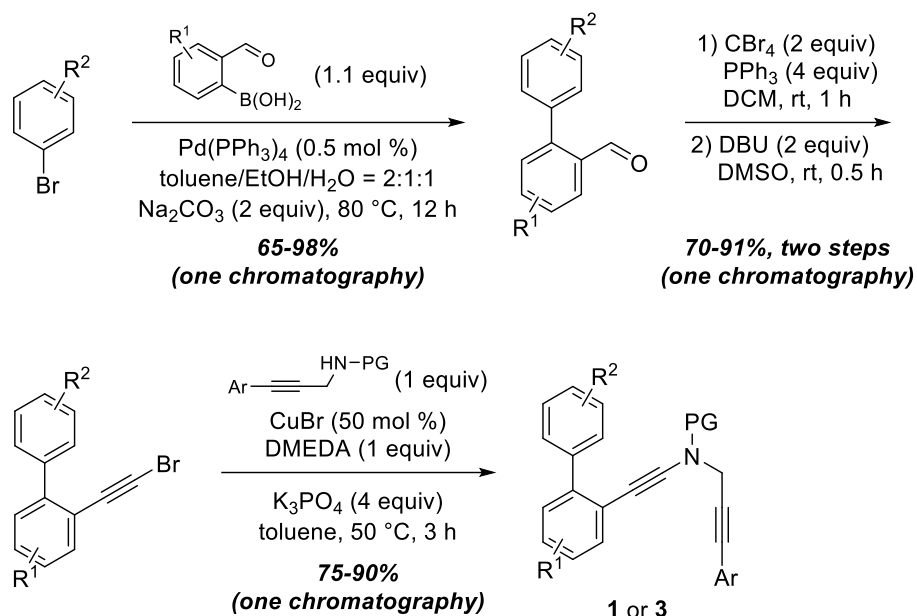

To a solution of substituted bromobenzene (10 mmol) in toluene (40 mL), EtOH (20 mL) and  $\text{H}_2\text{O}$  (20 mL) were added substituted 2-formylbenzeneboronic acid (11 mmol),  $\text{Na}_2\text{CO}_3$  (20 mmol, 2.12 g) and  $\text{Pd}(\text{PPh}_3)_4$  (0.05 mmol, 57.8 mg) at room temperature. The reaction mixture was stirred at  $80\text{ }^\circ\text{C}$  for 12 h. Upon completion (monitored by TLC), the reaction was filtered, extracted with ethyl acetate for three times, dried over  $\text{MgSO}_4$  and filtered. The filtrate was concentrated under reduced pressure and purified by column chromatography on silica gel (eluent: PE/EtOAc) to afford the desired biaryl aldehyde (65–98% yield).

Corey-Fuchs reaction was applied in the next step as follows: To a solution of  $\text{PPh}_3$  (26 mmol, 6.82 g) in DCM (20 mL) was added  $\text{CBr}_4$  (13 mmol, 3.98 g) carefully at  $0\text{ }^\circ\text{C}$ , and the reaction was stirred at this temperature for 0.5 h. Then the solution of the above biaryl aldehyde (6.5 mmol) in DCM (10 mL) was added slowly at  $0\text{ }^\circ\text{C}$ . The reaction was warmed to room temperature and stirred for additional 0.5 h. Upon completion (monitored by TLC), the reaction mixture was diluted with petroleum ether (150 mL), filtered through a Celite pad, and washed with petroleum ether for three times. The filtrate was concentrated under reduced pressure and directly used in the next step

without further purification. To a solution of dibromide derivative (6.5 mmol) in DCM (20 mL) was added DBU (13 mmol, 2 mL) and the reaction was stirred at room temperature for 30 min. Upon completion (monitored by TLC), the reaction mixture was diluted with water, extracted with ethyl acetate for three times, dried over  $\text{MgSO}_4$ , and filtered. The filtrate was concentrated under reduced pressure and purified by column chromatography on silica gel (eluent: PE) to afford the alkynyl bromide (70%–91% yield, two steps).

To a solution of the above alkynyl bromide (1 mmol) in toluene (5 mL) were added copper bromide (0.5 mmol, 72.0 mg), DMEDA (1 mmol, 100.0 mg),  $\text{K}_3\text{PO}_4$  (4 mmol, 0.85 g), and protected propargylamide derivative (1 mmol)<sup>1</sup>. The reaction was stirred at 50 °C for 3 h. Upon completion (monitored by TLC), the solution was filtered and concentrated under reduced pressure. The residue was purified by chromatography on silica gel (eluent: PE/EtOAc) to give the desired ynamide **1** or **3** (75–90% yield).

### 3.2. General Procedure S2 for Synthesis of *N*-propargyl Ynamides **1a**, **1ac**, **1ah**–**1aj**, **3z** and **3ae**

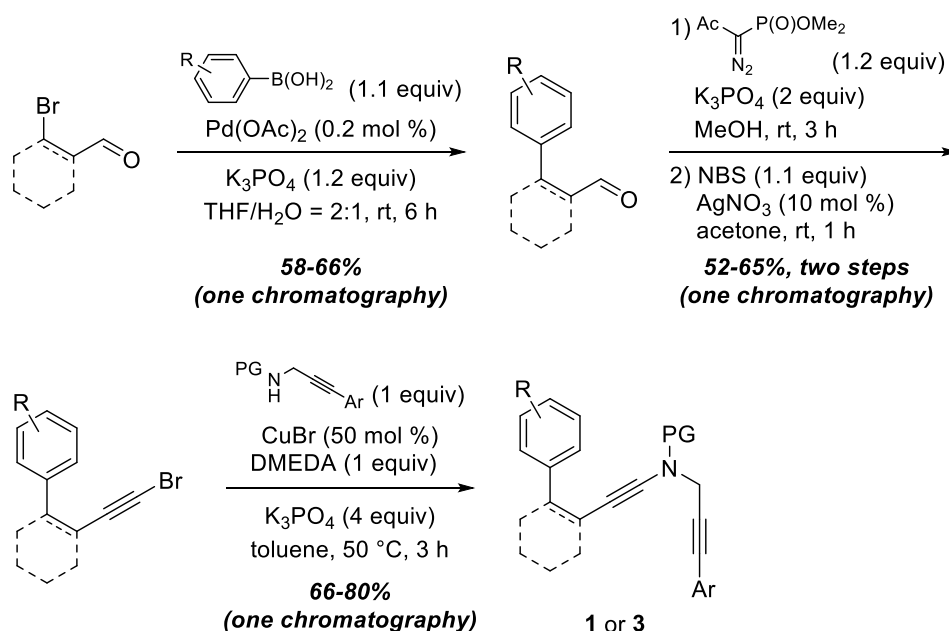

To a solution of 2-bromo-1-cyclohexene-1-carboxaldehyde (10 mmol) in THF (20 mL) and  $\text{H}_2\text{O}$  (10 mL) were added boronic acid derivative (11 mmol),  $\text{K}_3\text{PO}_4$  (12 mmol, 2.54 g), and  $\text{Pd(OAc)}_2$  (0.2 mmol, 4.5 mg) at room temperature and the reaction mixture

was stirred at room temperature for 6 h. Upon completion (monitored by TLC), the reaction was diluted with water (40 mL), extracted with ethyl acetate for three times, dried over MgSO<sub>4</sub> and filtered. The filtrate was concentrated under reduced pressure and purified by column chromatography on silica gel (eluent: PE/EtOAc) to afford the desired aldehyde (58–66% yield).

To a solution of above product (6 mmol) in MeOH (20 mL) were added K<sub>3</sub>PO<sub>4</sub> (7.3 mmol, 1.69 g) and Ohira-Bestmann reagent (7 mmol, 1.4 mL). The mixture was stirred at room temperature for 3 h. Upon completion (monitored by TLC), the reaction was filtered through a Celite pad, extracted with EtOAc for three times, dried over MgSO<sub>4</sub> and filtered. The resulting mixture was concentrated under reduced pressure to give crude alkyne without further purification. To a solution of the above alkyne in acetone (20 mL) were added NBS (6.6 mmol, 2.33 g) and AgNO<sub>3</sub> (0.3 mmol, 0.11 g) at 0 °C and stirred at room temperature for 1 h. Upon completion (monitored by TLC), the reaction mixture was filtered through a Celite pad and concentrated under reduced pressure. The residue was purified by column chromatography on silica gel (eluent: PE) to afford the desired alkynyl bromide (52–65% yield, 2 steps).

To a solution of the above alkynyl bromide (1 mmol) in toluene (5 mL) were added copper bromide (0.5 mmol, 72.0 mg), DMEDA (1 mmol, 100.0 mg), K<sub>3</sub>PO<sub>4</sub> (4 mmol, 0.85 g), and protected propargylamide derivative (1 mmol).<sup>[1]</sup> The reaction was stirred at 50 °C for 3 h. Upon completion (monitored by TLC), the solution was then filtered and concentrated under reduced pressure. The residue was purified by chromatography on silica gel (eluent: PE/EtOAc) to give the desired ynamide **1** or **3** (66–80% yield).

***N*-((4'-bromo-[1,1'-biphenyl]-2-yl)ethynyl)-*N*-(3-(4-(dimethylamino)phenyl)prop-2-yn-1-yl)methanesulfonamide (1a)**

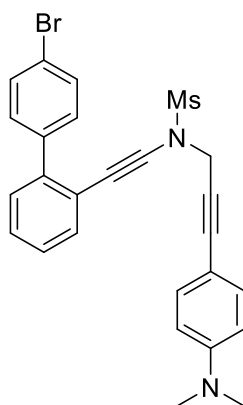

**1a**

Compound **1a** was prepared in 80% yield (406.0 mg) according to the general procedure S1 as a pale yellow oil.  $^1\text{H}$  NMR (500 MHz,  $\text{CDCl}_3$ )  $\delta$  7.54 (d,  $J = 7.5$  Hz, 1H), 7.50 – 7.44 (m, 4H), 7.36 – 7.24 (m, 5H), 6.60 (d,  $J = 9.0$  Hz, 2H), 4.46 (s, 2H), 2.97 (s, 3H), 2.95 (s, 6H);  $^{13}\text{C}$  NMR (125 MHz,  $\text{CDCl}_3$ )  $\delta$  150.5, 142.1, 139.3, 132.9, 132.7, 131.1, 130.9, 129.0, 128.2, 127.3, 121.5, 120.6, 111.6, 107.9, 88.2, 84.7, 79.2, 70.6, 43.1, 40.0, 38.5; IR (neat): 3055, 2927, 2214, 1606, 1539, 1521, 1361, 1266, 1160, 945; HRESIMS Calcd for  $[\text{C}_{26}\text{H}_{23}\text{BrN}_2\text{NaO}_2\text{S}]^+$  ( $\text{M} + \text{Na}^+$ ) 529.0556, found 529.0537.

***N*-((4'-bromo-[1,1'-biphenyl]-2-yl)ethynyl)-*N*-(3-(4-(dimethylamino)phenyl)prop-2-yn-1-yl)-4-methylbenzenesulfonamide (**1b**)**

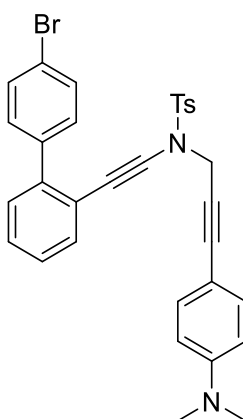

**1b**

Compound **1b** was prepared in 78% yield (455.2 mg) according to the general procedure S1 as a pale yellow oil.  $^1\text{H}$  NMR (400 MHz,  $\text{CDCl}_3$ )  $\delta$  7.64 (d,  $J = 8.0$  Hz, 2H), 7.51 (d,  $J = 7.6$  Hz, 1H), 7.49 – 7.38 (m, 4H), 7.35 – 7.21 (m, 3H), 7.17 (d,  $J = 8.0$  Hz, 2H), 7.02 (d,  $J = 8.8$  Hz, 2H), 6.54 (d,  $J = 8.8$  Hz, 2H), 4.45 (s, 2H), 2.94 (s, 6H),

2.37 (s, 3H);  $^{13}\text{C}$  NMR (100 MHz,  $\text{CDCl}_3$ )  $\delta$  150.3, 144.6, 141.8, 139.3, 134.5, 133.2, 132.8, 131.1, 130.9, 129.5, 129.1, 128.0, 127.9, 127.3, 121.6, 121.0, 111.5, 108.6, 87.5, 85.2, 78.9, 70.4, 43.1, 40.1, 21.6; IR (neat): 3090, 3053, 2221, 1601, 1549, 1516, 1456, 1371, 1191, 1042; HRESIMS Calcd for  $[\text{C}_{32}\text{H}_{27}\text{BrN}_2\text{NaO}_2\text{S}]^+$  ( $\text{M} + \text{Na}^+$ ) 605.0869, found 605.0852.

***N*-((4'-bromo-[1,1'-biphenyl]-2-yl)ethynyl)-*N*-(3-(4-(dimethylamino)phenyl)prop-2-yn-1-yl)benzenesulfonamide (1c)**

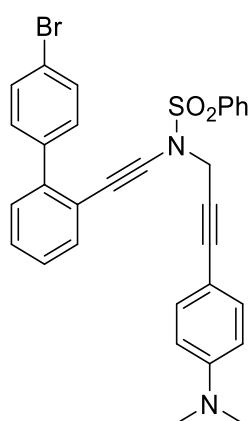

**1c**

Compound **1c** was prepared in 85% yield (484.1 mg) according to the general procedure S1 as a pale yellow oil.  $^1\text{H}$  NMR (500 MHz,  $\text{CDCl}_3$ )  $\delta$  7.76 (d,  $J = 8.5$  Hz, 2H), 7.58 – 7.53 (m, 1H), 7.51 (d,  $J = 7.5$  Hz, 1H), 7.46 – 7.34 (m, 6H), 7.35 – 7.24 (m, 3H), 7.04 (d,  $J = 9.0$  Hz, 2H), 6.54 (d,  $J = 9.0$  Hz, 2H), 4.49 (s, 2H), 2.94 (s, 6H);  $^{13}\text{C}$  NMR (125 MHz,  $\text{CDCl}_3$ )  $\delta$  150.3, 141.8, 139.3, 137.3, 133.5, 133.2, 132.8, 131.1, 130.9, 129.2, 128.8, 128.1, 127.9, 127.3, 121.6, 120.8, 111.5, 108.4, 87.6, 84.9, 78.8, 70.5, 43.1, 40.1; IR (neat): 3062, 2921, 2230, 1608, 1522, 1447, 1366, 1264, 1171, 1003; HRESIMS Calcd for  $[\text{C}_{31}\text{H}_{25}\text{BrN}_2\text{NaO}_2\text{S}]^+$  ( $\text{M} + \text{Na}^+$ ) 591.0712, found 591.0694.

***N*-((4'-bromo-[1,1'-biphenyl]-2-yl)ethynyl)-*N*-(3-(4-(dimethylamino)phenyl)prop-2-yn-1-yl)-4-methoxybenzenesulfonamide (1d)**

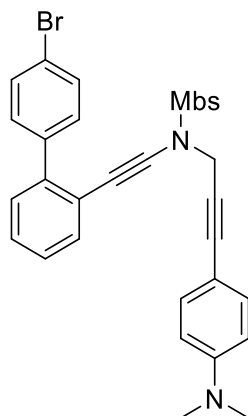

**1d**

Compound **1d** was prepared in 81% yield (485.6 mg) according to the general procedure S1 as a pale yellow oil.  $^1\text{H}$  NMR (400 MHz,  $\text{CDCl}_3$ )  $\delta$  7.69 (d,  $J = 8.9$  Hz, 2H), 7.55 – 7.40 (m, 5H), 7.37 – 7.19 (m, 3H), 7.04 (d,  $J = 8.8$  Hz, 2H), 6.82 (d,  $J = 8.8$  Hz, 2H), 6.54 (d,  $J = 9.2$  Hz, 2H), 4.44 (s, 2H), 3.78 (s, 3H), 2.94 (s, 6H);  $^{13}\text{C}$  NMR (100 MHz,  $\text{CDCl}_3$ )  $\delta$  163.6, 150.3, 141.7, 139.4, 133.1, 132.8, 131.1, 130.9, 130.2, 129.1, 128.9, 128.0, 127.3, 121.5, 121.0, 114.0, 111.5, 108.6, 87.5, 85.4, 79.0, 70.4, 55.6, 43.0, 40.1; IR (neat): 3053, 2925, 2807, 2230, 1607, 1578, 1475, 1312, 1227, 1129, 1030; HRESIMS Calcd for  $[\text{C}_{32}\text{H}_{27}\text{BrN}_2\text{NaO}_3\text{S}]^+$  ( $\text{M} + \text{Na}^+$ ) 621.0818, found 621.0805.

***N*-((4'-bromo-[1,1'-biphenyl]-2-yl)ethynyl)-*N*-(3-(4-(dimethylamino)phenyl)prop-2-yn-1-yl)-2,4,6-trimethylbenzenesulfonamide (**1e**)**

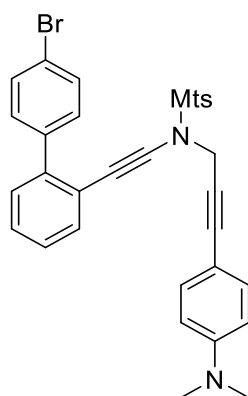

**1e**

Compound **1e** was prepared in 75% yield (458.7 mg) according to the general procedure S1 as a pale yellow oil.  $^1\text{H}$  NMR (400 MHz,  $\text{CDCl}_3$ )  $\delta$  7.44 – 7.36 (m, 5H), 7.29 – 7.21

(m, 3H), 7.17 (d,  $J = 8.8$  Hz, 2H), 6.93 (s, 2H), 6.57 (d,  $J = 9.2$  Hz, 2H), 4.47 (s, 2H), 2.94 (s, 6H), 2.61 (s, 6H), 2.29 (s, 3H);  $^{13}\text{C}$  NMR (100 MHz,  $\text{CDCl}_3$ )  $\delta$  150.3, 143.6, 141.8, 140.9, 139.2, 133.0, 132.9, 132.0, 131.8, 130.9, 130.8, 129.0, 128.0, 127.2, 121.5, 121.1, 111.6, 108.7, 87.0, 85.2, 79.4, 71.5, 41.5, 40.1, 23.1 21.0; IR (neat): 2982, 2857, 2219, 1609, 1519, 1441, 1342, 1187, 1036, 911; HRESIMS Calcd for  $[\text{C}_{34}\text{H}_{31}\text{BrN}_2\text{NaO}_2\text{S}]^+$  ( $\text{M} + \text{Na}^+$ ) 633.1182, found 633.1177.

**4-bromo-*N*-((4'-bromo-[1,1'-biphenyl]-2-yl)ethynyl)-*N*-(3-(4-(dimethylamino)phenyl)prop-2-yn-1-yl)benzenesulfonamide (1f)**

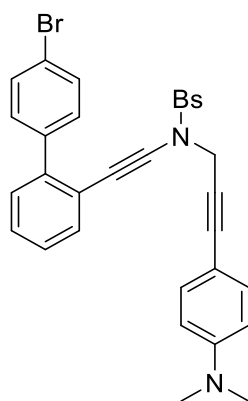

**1f**

Compound **1f** was prepared in 81% yield (525.2 mg) according to the general procedure S1 as a pale yellow oil.  $^1\text{H}$  NMR (400 MHz,  $\text{CDCl}_3$ )  $\delta$  7.58 (d,  $J = 8.8$  Hz, 2H), 7.54 – 7.48 (m, 3H), 7.47 – 7.42 (m, 4H), 7.37 – 7.25 (m, 3H), 6.99 (d,  $J = 8.8$  Hz, 2H), 6.57 (d,  $J = 8.8$  Hz, 2H), 4.48 (s, 2H), 2.95 (s, 6H);  $^{13}\text{C}$  NMR (100 MHz,  $\text{CDCl}_3$ )  $\delta$  150.4, 141.9, 139.3, 136.5, 133.0, 132.8, 132.1, 131.2, 130.9, 129.4, 129.2, 128.9, 128.2, 127.3, 121.7, 120.7, 111.7, 108.2, 88.0, 84.7, 78.5, 70.6, 43.3, 40.1; IR (neat): 3059, 2858, 2231, 1606, 1518, 1475, 1373, 1174, 1069, 944; HRESIMS Calcd for  $[\text{C}_{31}\text{H}_{24}\text{Br}_2\text{N}_2\text{NaO}_2\text{S}]^+$  ( $\text{M} + \text{Na}^+$ ) 668.9817, found 668.9801.

***N*-(3-(4-(dimethylamino)phenyl)prop-2-yn-1-yl)-*N*-((4'-fluoro-[1,1'-biphenyl]-2-yl)ethynyl)methanesulfonamide (1g)**

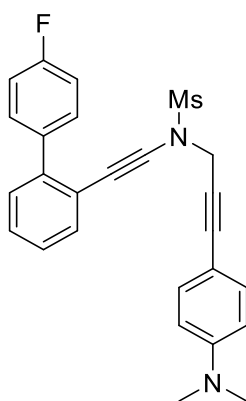

**1g**

Compound **1g** was prepared in 77% yield (343.8 mg) according to the general procedure S1 as a pale yellow oil.  $^1\text{H}$  NMR (400 MHz,  $\text{CDCl}_3$ )  $\delta$  7.61 – 7.44 (m, 3H), 7.36 – 7.21 (m, 5H), 7.08 – 6.98 (m, 2H), 6.57 (d,  $J = 9.2$  Hz, 2H), 4.44 (s, 2H), 2.98 (s, 3H), 2.91 (s, 6H);  $^{13}\text{C}$  NMR (100 MHz,  $\text{CDCl}_3$ )  $\delta$  162.1 (d,  $J = 245$  Hz), 150.4, 142.2, 136.3 (d,  $J = 3.0$  Hz), 132.8, 132.6, 130.8 (d,  $J = 8.0$  Hz), 129.1, 128.1, 127.0, 120.6, 114.8 (d,  $J = 21.0$  Hz), 111.5, 107.8, 88.1, 84.4, 79.1, 70.7, 43.0, 39.9, 38.4;  $^{19}\text{F}$  NMR (376 MHz,  $\text{CDCl}_3$ )  $\delta$  -114.9 (s). IR (neat): 3042, 2927, 2233, 1608, 1480, 1360, 1265, 1191, 1031, 967; HRESIMS Calcd for  $[\text{C}_{26}\text{H}_{23}\text{FN}_2\text{NaO}_2\text{S}]^+$  ( $\text{M} + \text{Na}^+$ ) 469.1356, found 469.1343.

***N*-((4'-chloro-[1,1'-biphenyl]-2-yl)ethynyl)-*N*-(3-(4-(dimethylamino)phenyl)prop-2-yn-1-yl)methanesulfonamide (**1h**)**

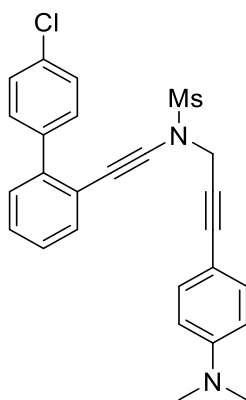

**1h**

Compound **1h** was prepared in 89% yield (412.1 mg) according to the general procedure S1 as a pale yellow oil.  $^1\text{H}$  NMR (400 MHz,  $\text{CDCl}_3$ )  $\delta$  7.56 – 7.50 (m, 3H),



7.42 – 7.13 (m, 7H), 6.60 (d,  $J = 8.4$  Hz, 2H), 4.46 (s, 2H), 2.98 (s, 3H), 2.95 (s, 6H);  $^{13}\text{C}$  NMR (100 MHz,  $\text{CDCl}_3$ )  $\delta$  150.5, 142.1, 138.9, 133.4, 132.9, 132.7, 130.6, 129.1, 128.2, 128.1, 127.3, 120.7, 111.7, 108.0, 88.2, 84.7, 79.2, 70.7, 43.2, 40.0, 38.5; IR (neat): 2926, 2854, 2234, 1608, 1523, 1444, 1323, 1191, 1089, 964; HRESIMS Calcd for  $[\text{C}_{26}\text{H}_{23}\text{ClN}_2\text{NaO}_2\text{S}]^+$  ( $\text{M} + \text{Na}^+$ ) 485.1061, found 485.1040.

***N*-(3-(4-(dimethylamino)phenyl)prop-2-yn-1-yl)-*N*-((3'-fluoro-[1,1'-biphenyl]-2-yl)ethynyl)methanesulfonamide (1i)**

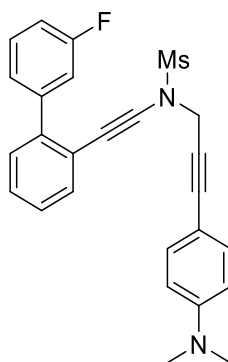

**1i**

Compound **1i** was prepared in 75% yield (334.6 mg) according to the general procedure S1 as a pale yellow oil.  $^1\text{H}$  NMR (400 MHz,  $\text{CDCl}_3$ )  $\delta$  7.57 – 7.51 (m, 1H), 7.43 – 7.37 (m, 1H), 7.36 – 7.33 (m, 2H), 7.32 – 7.26 (m, 3H), 7.25 – 7.21 (m, 2H), 7.02 – 6.95 (m, 1H), 6.58 (d,  $J = 8.8$  Hz, 2H), 4.46 (s, 2H), 3.01 (s, 3H), 2.94 (s, 6H);  $^{13}\text{C}$  NMR (100 MHz,  $\text{CDCl}_3$ )  $\delta$  162.4 (d,  $J = 244.0$  Hz), 150.4, 142.6 (d,  $J = 8.0$  Hz), 142.0 (d,  $J = 2.0$  Hz), 132.9, 132.7, 129.5 (d,  $J = 8.0$  Hz), 129.2, 128.2, 127.5, 125.1 (d,  $J = 3.0$  Hz), 120.8, 116.0 (d,  $J = 21.0$  Hz), 114.2 (d,  $J = 21.0$  Hz), 111.6, 108.0, 88.1, 84.7, 79.1, 70.5, 43.2, 40.0, 38.6;  $^{19}\text{F}$  NMR (376 MHz,  $\text{CDCl}_3$ )  $\delta$  -111.9 – -116.3 (m); IR (neat): 3014, 2236, 1607, 1524, 1446, 1362, 1261, 1160, 1035, 966; HRESIMS Calcd for  $[\text{C}_{26}\text{H}_{23}\text{FKN}_2\text{O}_2\text{S}]^+$  ( $\text{M} + \text{K}^+$ ) 485.1096, found 485.1094.

***N*-((4'-bromo-[1,1'-biphenyl]-2-yl)ethynyl)-*N*-(3-(4-(pyrrolidin-1-yl)phenyl)prop-2-yn-1-yl)methanesulfonamide (1j)**

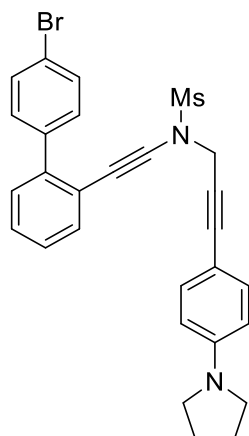

**1j**

Compound **1j** was prepared in 80% yield (421.4 mg) according to the general procedure S1 as a pale yellow oil.  $^1\text{H}$  NMR (500 MHz,  $\text{CDCl}_3$ )  $\delta$  7.54 (d,  $J = 7.5$  Hz, 1H), 7.51 – 7.40 (m, 4H), 7.38 – 7.26 (m, 5H), 6.45 (d,  $J = 8.5$  Hz, 2H), 4.47 (s, 2H), 3.34 – 3.16 (m, 4H), 2.98 (s, 3H), 2.06 – 1.91 (m, 4H);  $^{13}\text{C}$  NMR (125 MHz,  $\text{CDCl}_3$ )  $\delta$  148.0, 142.1, 139.4, 133.0, 132.7, 131.1, 130.9, 129.1, 128.2, 127.3, 121.6, 120.7, 111.3, 107.0, 88.5, 84.8, 79.0, 70.6, 47.4, 43.3, 38.5, 25.4; IR (neat): 3053, 2923, 2231, 1622, 1516, 1488, 1394, 1263, 1165, 1031; HRESIMS Calcd for  $[\text{C}_{28}\text{H}_{25}\text{BrN}_2\text{NaO}_2\text{S}]^+$  ( $\text{M} + \text{Na}^+$ ) 555.0712, found 555.0697.

***N*-((4'-bromo-[1,1'-biphenyl]-2-yl)ethynyl)-*N*-(3-(4-(dibenzylamino)phenyl)prop-2-yn-1-yl)methanesulfonamide (**1k**)**

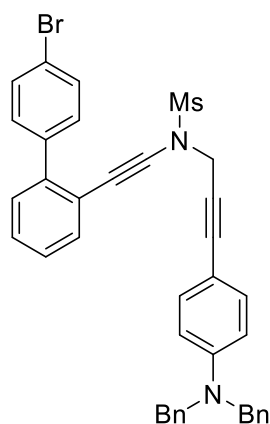

**1k**

Compound **1k** was prepared in 76% yield (500.2 mg) according to the general procedure S1 as a pale yellow oil.  $^1\text{H}$  NMR (400 MHz,  $\text{CDCl}_3$ )  $\delta$  7.52 (d,  $J = 8.0$  Hz,

1H), 7.50 – 7.40 (m, 4H), 7.35 – 7.28 (m, 6H), 7.28 – 7.21 (m, 2H), 7.22 – 7.14 (m, 7H), 6.63 (d,  $J = 8.8$  Hz, 2H), 4.65 (s, 4H), 4.43 (s, 2H), 2.95 (s, 3H);  $^{13}\text{C}$  NMR (100 MHz,  $\text{CDCl}_3$ )  $\delta$  149.4, 142.1, 139.3, 137.6, 133.1, 132.8, 131.1, 130.9, 129.1, 128.7, 128.3, 127.3, 127.1, 126.4, 121.6, 120.6, 112.0, 108.7, 87.9, 84.6, 79.3, 70.6, 54.1, 43.1, 38.5; IR (neat): 3053, 2850, 2231, 1646, 1506, 1472, 1338, 1263, 1127, 1002; HRESIMS Calcd for  $[\text{C}_{38}\text{H}_{31}\text{BrN}_2\text{NaO}_2\text{S}]^+$  ( $\text{M} + \text{Na}^+$ ) 681.1182, found 681.1159.

***N*-((4'-bromo-[1,1'-biphenyl]-2-yl)ethynyl)-*N*-(3-(4-methoxyphenyl)prop-2-yn-1-yl)methanesulfonamide (1l)**

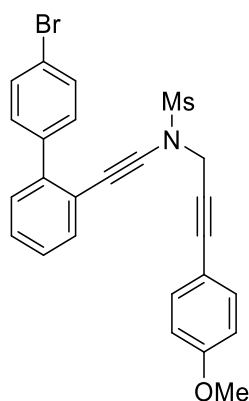

**1l**

Compound **1l** was prepared in 78% yield (385.6 mg) according to the general procedure S1 as a pale yellow oil.  $^1\text{H}$  NMR (400 MHz,  $\text{CDCl}_3$ )  $\delta$  7.54 (d,  $J = 7.6$  Hz, 1H), 7.52 – 7.43 (m, 4H), 7.38 – 7.26 (m, 5H), 6.84 (d,  $J = 8.8$  Hz, 2H), 4.46 (s, 2H), 3.78 (s, 3H), 2.98 (s, 3H);  $^{13}\text{C}$  NMR (100 MHz,  $\text{CDCl}_3$ )  $\delta$  160.1, 142.1, 139.3, 133.2, 132.7, 131.0, 130.8, 129.0, 128.3, 127.3, 121.5, 120.5, 114.0, 113.5, 86.8, 84.4, 80.1, 70.7, 55.2, 42.8, 38.4; IR (neat): 3048, 2931, 2230, 1647, 1506, 1472, 1362, 1254, 1092, 960; HRESIMS Calcd for  $[\text{C}_{25}\text{H}_{20}\text{BrNNaO}_3\text{S}]^+$  ( $\text{M} + \text{Na}^+$ ) 516.0239, found 516.0220.

***N*-(3-(4-(benzyloxy)phenyl)prop-2-yn-1-yl)-*N*-((4'-bromo-[1,1'-biphenyl]-2-yl)ethynyl)methanesulfonamide (1m)**

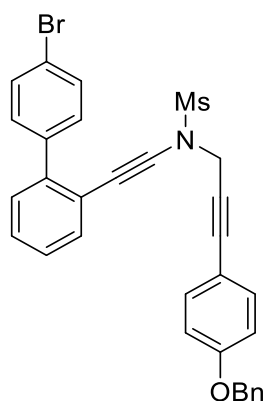

**1m**

Compound **1m** was prepared in 80% yield (456.4 mg) according to the general procedure S1 as a pale yellow oil.  $^1\text{H}$  NMR (500 MHz,  $\text{CDCl}_3$ )  $\delta$  7.54 (d,  $J = 7.5$  Hz, 1H), 7.49 – 7.44 (m, 4H), 7.42 – 7.28 (m, 10H), 6.91 (d,  $J = 9.0$  Hz, 2H), 5.05 (s, 2H), 4.45 (s, 2H), 2.97 (s, 3H);  $^{13}\text{C}$  NMR (125 MHz,  $\text{CDCl}_3$ )  $\delta$  159.3, 142.2, 139.3, 136.3, 133.3, 132.7, 131.1, 130.9, 129.1, 128.6, 128.3, 128.1, 127.4, 121.6, 120.6, 115.0, 113.8, 86.9, 84.5, 80.2, 70.8, 70.0, 42.8, 38.5; IR (neat): 3033, 2929, 2234, 1603, 1505, 1455, 1367, 1252, 1165, 1003; HRESIMS Calcd for  $[\text{C}_{31}\text{H}_{24}\text{BrKNO}_3\text{S}]^+$  ( $\text{M} + \text{K}^+$ ) 608.0292, found 608.0276.

***N*-((4'-bromo-[1,1'-biphenyl]-2-yl)ethynyl)-*N*-(3-(*p*-tolyl)prop-2-yn-1-yl)methanesulfonamide (**1n**)**

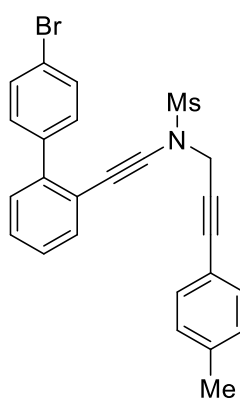

**1n**

Compound **1n** was prepared in 90% yield (430.6 mg) according to the general procedure S1 as a pale yellow oil.  $^1\text{H}$  NMR (400 MHz,  $\text{CDCl}_3$ )  $\delta$  7.54 (d,  $J = 7.6$  Hz, 1H), 7.50 – 7.42 (m, 4H), 7.38 – 7.26 (m, 5H), 7.12 (d,  $J = 8.0$  Hz, 2H), 4.46 (s, 2H),

2.98 (s, 3H), 2.34 (s, 3H);  $^{13}\text{C}$  NMR (100 MHz,  $\text{CDCl}_3$ )  $\delta$  142.1, 139.3(1), 139.2(9), 132.7, 131.6, 131.1, 130.9, 129.2, 129.1, 128.3, 127.4, 121.6, 120.5, 118.4, 87.0, 84.4, 80.8, 70.8, 42.7, 38.4, 21.4; IR (neat): 3058, 2977, 2236, 1608, 1508, 1410, 1361, 1265, 1166, 1014; HRESIMS Calcd for  $[\text{C}_{25}\text{H}_{20}\text{BrNNaO}_2\text{S}]^+$  ( $\text{M} + \text{Na}^+$ ) 500.0290, found 500.0278.

***N*-(3-([1,1'-biphenyl]-4-yl)prop-2-yn-1-yl)-*N*-((4'-bromo-[1,1'-biphenyl]-2-yl)ethynyl)methanesulfonamide (1o)**

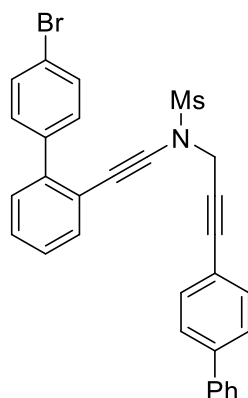

**1o**

Compound **1o** was prepared in 82% yield (443.2 mg) according to the general procedure S1 as a pale yellow oil.  $^1\text{H}$  NMR (400 MHz,  $\text{CDCl}_3$ )  $\delta$  7.61 – 7.52 (m, 5H), 7.51 – 7.40 (m, 8H), 7.39 – 7.27 (m, 4H), 4.50 (s, 2H), 3.00 (s, 3H);  $^{13}\text{C}$  NMR (100 MHz,  $\text{CDCl}_3$ )  $\delta$  142.2, 141.8, 140.0, 139.3, 132.7, 132.2, 131.1, 130.9, 129.1, 128.9, 128.4, 127.8, 127.4, 127.1, 127.0, 121.6, 120.5, 120.3, 86.8, 84.3, 82.1, 70.9, 42.7, 38.5; IR (neat): 3059, 2928, 2234, 1599, 1519, 1487, 1361, 1265, 1129, 1003; HRESIMS Calcd for  $[\text{C}_{24}\text{H}_{18}\text{BrKNO}_2\text{S}]^+$  ( $\text{M} + \text{K}^+$ ) 501.9873, found 501.9850

***N*-((4'-bromo-[1,1'-biphenyl]-2-yl)ethynyl)-*N*-(3-(4-(methylthio)phenyl)prop-2-yn-1-yl)methanesulfonamide (1p)**

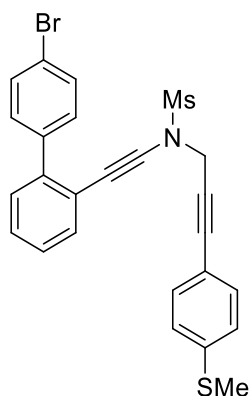

**1p**

Compound **1p** was prepared in 88% yield (449.2 mg) according to the general procedure S1 as a pale yellow oil.  $^1\text{H}$  NMR (400 MHz,  $\text{CDCl}_3$ )  $\delta$  7.53 (d,  $J = 7.6$  Hz, 1H), 7.50 – 7.42 (m, 4H), 7.38 – 7.24 (m, 5H), 7.15 (d,  $J = 8.4$  Hz, 2H), 4.46 (s, 2H), 2.97 (s, 3H), 2.44 (s, 3H);  $^{13}\text{C}$  NMR (100 MHz,  $\text{CDCl}_3$ )  $\delta$  142.0, 140.5, 139.2, 132.6, 131.9, 131.0, 130.8, 129.0, 128.3, 127.3, 125.6, 121.5, 120.4, 117.4, 86.6, 84.3, 81.4, 70.8, 42.6, 38.4, 15.0; IR (neat): 3066, 2918, 2242, 1590, 1455, 1361, 1268, 1185, 1045, 943; HRESIMS Calcd for  $[\text{C}_{25}\text{H}_{20}\text{BrNNaO}_2\text{S}_2]^+$  ( $\text{M} + \text{Na}^+$ ) 532.0011, found 532.0002.

***N*-(3-(benzo[d][1,3]dioxol-5-yl)prop-2-yn-1-yl)-*N*-((4'-bromo-[1,1'-biphenyl]-2-yl)ethynyl)methanesulfonamide (**1q**)**

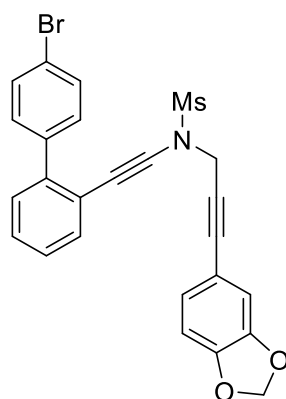

**1q**

Compound **1q** was prepared in 83% yield (421.1 mg) according to the general procedure S1 as a pale yellow oil.  $^1\text{H}$  NMR (400 MHz,  $\text{CDCl}_3$ )  $\delta$  7.54 (d,  $J = 7.6$  Hz, 1H), 7.51 – 7.43 (m, 4H), 7.38 – 7.27 (m, 3H), 6.91 (dd,  $J = 8.0, 1.6$  Hz, 1H), 6.80 (d,  $J = 1.2$  Hz, 1H), 6.75 (d,  $J = 8.0$  Hz, 1H), 5.96 (s, 2H), 4.45 (s, 2H), 2.97 (s, 3H);  $^{13}\text{C}$

NMR (100 MHz, CDCl<sub>3</sub>)  $\delta$  148.5, 147.5, 142.1, 139.3, 132.7, 131.1, 130.9, 129.1, 128.3, 127.4, 126.6, 121.6, 120.5, 114.6, 111.6, 108.5, 101.4, 86.8, 84.3, 79.8, 70.8, 42.7, 38.4; IR (neat): 3059, 2926, 2231, 1602, 1502, 1442, 1363, 1249, 1168, 1031; HRESIMS Calcd for [C<sub>25</sub>H<sub>18</sub>BrNNaO<sub>4</sub>S]<sup>+</sup> (M + Na<sup>+</sup>) 530.0032, found 530.0016.

***N*-((4'-bromo-[1,1'-biphenyl]-2-yl)ethynyl)-*N*-(3-(3,4-dimethoxyphenyl)prop-2-yn-1-yl)methanesulfonamide (1r)**

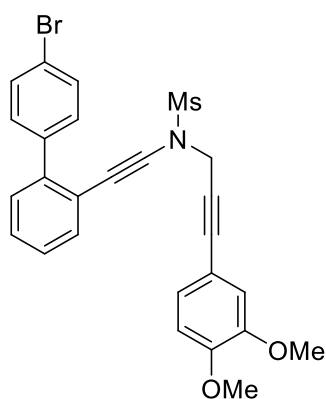

**1r**

Compound **1r** was prepared in 89% yield (451.1 mg) according to the general procedure S1 as a pale yellow oil. <sup>1</sup>H NMR (400 MHz, CDCl<sub>3</sub>)  $\delta$  7.55 (d, *J* = 7.6 Hz, 1H), 7.50 – 7.42 (m, 4H), 7.38 – 7.28 (m, 3H), 7.01 (dd, *J* = 8.4, 2.0 Hz, 1H), 6.90 (d, *J* = 1.6 Hz, 1H), 6.80 (d, *J* = 8.4 Hz, 1H), 4.48 (s, 2H), 3.88 (s, 3H), 3.84 (s, 3H), 2.98 (s, 3H); <sup>13</sup>C NMR (100 MHz, CDCl<sub>3</sub>)  $\delta$  150.0, 148.6, 142.1, 139.2, 132.6, 131.0, 130.8, 129.0, 128.3, 127.3, 125.2, 121.5, 120.5, 114.2, 113.6, 111.0, 87.0, 84.4, 80.0, 70.8, 55.8, 42.7, 38.4; IR (neat): 3059, 2933, 2232, 1599, 1474, 1324, 1210, 1137, 1026, 964; HRESIMS Calcd for [C<sub>26</sub>H<sub>22</sub>BrNNaO<sub>4</sub>S]<sup>+</sup> (M + Na<sup>+</sup>) 546.0345, found 546.0304.

***N*-((4'-bromo-[1,1'-biphenyl]-2-yl)ethynyl)-*N*-(3-(thiophen-2-yl)prop-2-yn-1-yl)methanesulfonamide (1s)**

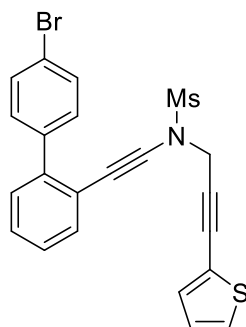

**1s**

Compound **1s** was prepared in 91% yield (428.1 mg) according to the general procedure S1 as a pale yellow oil.  $^1\text{H}$  NMR (500 MHz,  $\text{CDCl}_3$ )  $\delta$  7.54 (d,  $J = 7.5$  Hz, 1H), 7.51 – 7.42 (m, 4H), 7.37 – 7.26 (m, 4H), 7.25 – 7.19 (m, 1H), 6.97 (dd,  $J = 5.0, 4.0$  Hz, 1H), 4.48 (s, 2H), 2.95 (s, 3H);  $^{13}\text{C}$  NMR (125 MHz,  $\text{CDCl}_3$ )  $\delta$  142.2, 139.3, 133.1, 132.7, 131.1, 130.9, 129.1, 128.4, 128.1, 127.4, 127.1, 121.6, 121.2, 120.4, 85.5, 84.2, 80.2, 71.0, 42.8, 38.4; IR (neat): 3107, 3022, 2229, 1587, 1424, 1362, 1265, 1129, 1031, 963; HRESIMS Calcd for  $[\text{C}_{22}\text{H}_{16}\text{BrNNaO}_2\text{S}_2]^+$  ( $\text{M} + \text{Na}^+$ ) 491.9698, found 491.9683.

***N*-((4'-bromo-5-fluoro-[1,1'-biphenyl]-2-yl)ethynyl)-*N*-(3-(4-(dimethylamino)phenyl)prop-2-yn-1-yl)methanesulfonamide (**1t**)**

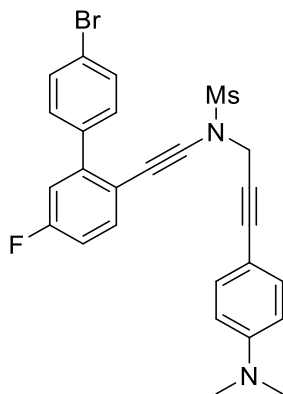

**1t**

Compound **1t** was prepared in 83% yield (425.6 mg) according to the general procedure S1 as a pale yellow oil.  $^1\text{H}$  NMR (400 MHz,  $\text{CDCl}_3$ )  $\delta$  7.59 – 7.39 (m, 5H), 7.32 – 7.19 (m, 2H), 7.10 – 6.93 (m, 2H), 6.61 (d,  $J = 8.4$  Hz, 2H), 4.46 (s, 2H), 2.98 (s, 3H), 2.96 (s, 6H);  $^{13}\text{C}$  NMR (100 MHz,  $\text{CDCl}_3$ )  $\delta$  162.2 (d,  $J = 249.0$  Hz), 150.5, 144.5 (d,  $J = 8.0$  Hz), 138.2, 134.8 (d,  $J = 9.0$  Hz), 132.9, 131.3, 130.7, 122.2, 116.7 (d,  $J = 3.0$  Hz), 116.1 (d,  $J = 23.0$  Hz), 114.6 (d,  $J = 22.0$  Hz), 111.7, 107.9, 88.2, 84.2, 79.2, 69.6, 43.1,



40.0, 38.5;  $^{19}\text{F}$  NMR (376 MHz,  $\text{CDCl}_3$ )  $\delta$  -113.4 – -113.8 (m); IR (neat): 3043, 2811, 2238, 1607, 1521, 1416, 1362, 1259, 1163, 1009; HRESIMS Calcd for  $[\text{C}_{24}\text{H}_{17}\text{BrFNNaO}_2\text{S}]^+$  ( $\text{M} + \text{Na}^+$ ) 547.0462, found 547.0444.

***N*-((4'-bromo-5-chloro-[1,1'-biphenyl]-2-yl)ethynyl)-*N*-(3-(4-(dimethylamino)phenyl)prop-2-yn-1-yl)methanesulfonamide (**1u**)**

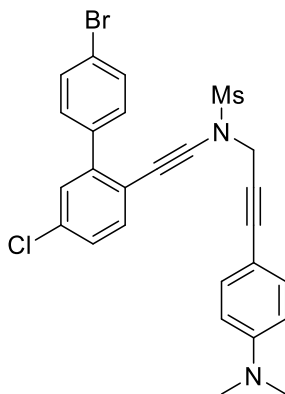

**1u**

Compound **1u** was prepared in 92% yield (499.0 mg) according to the general procedure S1 as a pale yellow oil.  $^1\text{H}$  NMR (400 MHz,  $\text{CDCl}_3$ )  $\delta$  7.52 – 7.40 (m, 5H), 7.32 (d,  $J = 2.0$  Hz, 1H), 7.30 – 7.21 (m, 3H), 6.60 (d,  $J = 8.8$  Hz, 2H), 4.46 (s, 2H), 2.98 (s, 3H), 2.96 (s, 6H);  $^{13}\text{C}$  NMR (100 MHz,  $\text{CDCl}_3$ )  $\delta$  150.5, 143.5, 138.0, 133.9, 133.8, 132.9, 131.3, 130.7, 129.0, 127.5, 122.1, 119.2, 111.6, 107.8, 88.3, 85.5, 79.1, 69.8, 43.1, 40.0, 38.6; IR (neat): 2924, 2808, 2239, 1608, 1520, 1475, 1368, 1265, 1107, 1008; HRESIMS Calcd for  $[\text{C}_{26}\text{H}_{22}\text{BrClN}_2\text{NaO}_2\text{S}]^+$  ( $\text{M} + \text{Na}^+$ ) 563.0166, found 563.0159.

***N*-((4'-bromo-5-methoxy-[1,1'-biphenyl]-2-yl)ethynyl)-*N*-(3-(4-(dimethylamino)phenyl)prop-2-yn-1-yl)methanesulfonamide (**1v**)**

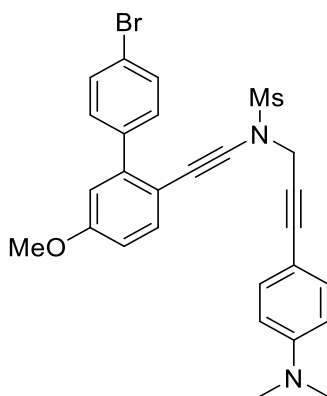

**1v**

Compound **1v** was prepared in 80% yield (430.0 mg) according to the general procedure S1 as a pale yellow oil.  $^1\text{H}$  NMR (400 MHz,  $\text{CDCl}_3$ )  $\delta$  7.58 – 7.36 (m, 5H), 7.26 (d,  $J$  = 8.8 Hz, 2H), 6.89 – 6.76 (m, 2H), 6.60 (d,  $J$  = 8.8 Hz, 2H), 4.45 (s, 2H), 3.81 (s, 3H), 2.95 (s, 6H), 2.95 (s, 3H);  $^{13}\text{C}$  NMR (100 MHz,  $\text{CDCl}_3$ )  $\delta$  159.6, 150.5, 144.2, 139.3, 134.8, 132.9, 131.0, 130.8, 121.6, 114.7, 113.1, 112.6, 111.7, 108.0, 88.0, 83.0, 79.3, 70.2, 55.3, 43.2, 40.0, 38.3; IR (neat): 3009, 2837, 2213, 1607, 1557, 1446, 1361, 1266, 1159, 1033 ; HRESIMS Calcd for  $[\text{C}_{27}\text{H}_{25}\text{BrKN}_2\text{O}_3\text{S}]^+$  ( $\text{M} + \text{K}^+$ ) 575.0401, found 575.0389.

***N*-((4'-bromo-4-chloro-[1,1'-biphenyl]-2-yl)ethynyl)-*N*-(3-(4-(dimethylamino)phenyl)prop-2-yn-1-yl)methanesulfonamide (**1w**)**

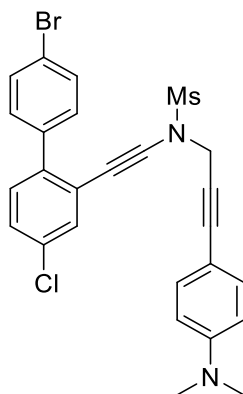

**1w**

Compound **1w** was prepared in 78% yield (422.7 mg) according to the general procedure S1 as a pale yellow oil.  $^1\text{H}$  NMR (400 MHz,  $\text{CDCl}_3$ )  $\delta$  7.59 – 7.33 (m, 5H), 7.34 – 7.18 (m, 4H), 6.60 (d,  $J$  = 8.8 Hz, 2H), 4.47 (s, 2H), 2.99 (s, 3H), 2.96 (s, 6H);  $^{13}\text{C}$  NMR (100 MHz,  $\text{CDCl}_3$ )  $\delta$  150.5, 140.3, 138.2, 133.2, 132.9, 132.0, 131.2, 130.7,

130.2, 128.3, 122.4, 121.9, 111.7, 107.8, 88.4, 85.8, 79.0, 69.8, 43.1, 40.0, 38.7; IR (neat): 3048, 2927, 2237, 1607, 1522, 1445, 1357, 1227, 1166, 963; HRESIMS Calcd for  $[\text{C}_{26}\text{H}_{22}\text{BrClN}_2\text{NaO}_2\text{S}]^+$  ( $\text{M} + \text{Na}^+$ ) 563.0166, found 563.0150.

***N*-((4'-bromo-4-methyl-[1,1'-biphenyl]-2-yl)ethynyl)-*N*-(3-(4-(dimethylamino)phenyl)prop-2-yn-1-yl)methanesulfonamide (**1x**)**

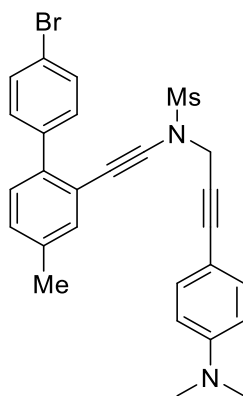

**1x**

Compound **1x** was prepared in 77% yield (401.5 mg) according to the general procedure S1 as a pale yellow oil.  $^1\text{H}$  NMR (400 MHz,  $\text{CDCl}_3$ )  $\delta$  7.51 – 7.40 (m, 4H), 7.36 (s, 1H), 7.27 (d,  $J = 9.2$  Hz, 2H), 7.23 – 7.21 (m, 1H), 7.15 (dd,  $J = 8.0, 1.2$  Hz, 1H), 6.60 (d,  $J = 9.2$  Hz, 2H), 4.46 (s, 2H), 2.99 (s, 3H), 2.95 (s, 6H), 2.34 (s, 3H);  $^{13}\text{C}$  NMR (100 MHz,  $\text{CDCl}_3$ )  $\delta$  150.5, 139.3, 139.2, 137.2, 133.2, 132.9, 131.0, 130.8, 129.2, 128.9, 121.3, 120.3, 111.6, 107.9, 88.2, 84.3, 79.2, 70.8, 43.1, 40.0, 38.4, 20.8; IR (neat): 3023, 2860, 2236, 1608, 1525, 1446, 1362, 1266, 1161, 1037; HRESIMS Calcd for  $[\text{C}_{27}\text{H}_{25}\text{BrN}_2\text{NaO}_2\text{S}]^+$  ( $\text{M} + \text{Na}^+$ ) 543.0712, found 543.0452.

***N*-((4'-bromo-4-methoxy-[1,1'-biphenyl]-2-yl)ethynyl)-*N*-(3-(4-(dimethylamino)phenyl)prop-2-yn-1-yl)methanesulfonamide (**1y**)**

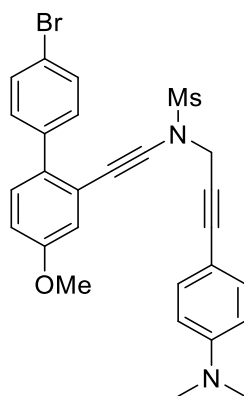

**1y**

Compound **1y** was prepared in 95% yield (510.6 mg) according to the general procedure S1 as a pale yellow oil.  $^1\text{H}$  NMR (400 MHz,  $\text{CDCl}_3$ )  $\delta$  7.50 – 7.42 (m, 4H), 7.30 – 7.17 (m, 3H), 7.04 (d,  $J = 2.4$  Hz, 1H), 6.90 (dd,  $J = 8.8, 2.4$  Hz, 1H), 6.59 (d,  $J = 8.8$  Hz, 2H), 4.47 (s, 2H), 3.79 (s, 3H), 2.99 (s, 3H), 2.95 (s, 6H);  $^{13}\text{C}$  NMR (100 MHz,  $\text{CDCl}_3$ )  $\delta$  158.6, 150.5, 139.1, 134.8, 132.9, 131.0, 130.8, 130.2, 121.5, 121.0, 116.8, 115.1, 111.6, 107.9, 88.2, 84.4, 79.2, 70.8, 55.4, 43.1, 40.0, 38.5; IR (neat): 3050, 2989, 2245, 1609, 1525, 1429, 1303, 1225, 1168, 1013; HRESIMS Calcd for  $[\text{C}_{27}\text{H}_{25}\text{BrN}_2\text{NaO}_3\text{S}]^+$  ( $\text{M} + \text{Na}^+$ ) 559.0661, found 559.0649.

***N*-([1,1'-biphenyl]-2-ylethynyl)-*N*-(3-(4-methoxyphenyl)prop-2-yn-1-yl)methanesulfonamide (**1z**)**

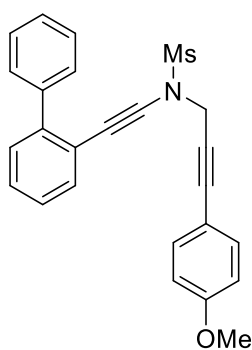

**1z**

Compound **1z** was prepared in 93% yield (386.4 mg) according to the general procedure S1 as a pale yellow oil.  $^1\text{H}$  NMR (400 MHz,  $\text{CDCl}_3$ )  $\delta$  7.59 (d,  $J = 6.8$  Hz, 2H), 7.56 – 7.50 (m, 1H), 7.39 – 7.25 (m, 8H), 6.82 (d,  $J = 8.8$  Hz, 2H), 4.43 (s, 2H), 3.76 (s, 3H), 2.92 (s, 3H);  $^{13}\text{C}$  NMR (100 MHz,  $\text{CDCl}_3$ )  $\delta$  160.0, 143.5, 140.4, 133.2, 132.5, 129.3,

129.1, 128.2, 127.9, 127.2, 127.0, 120.6, 113.9, 113.6, 86.7, 84.0, 80.2, 71.0, 55.2, 42.8, 38.4; IR (neat): 3050, 2916, 2244, 1609, 1525, 1416, 1303, 1225, 1168, 1013; HRESIMS Calcd for  $[C_{25}H_{21}KNO_3S]^+$  ( $M + K^+$ ) 454.0874, found 454.0885.

***N*-(3-(4-methoxyphenyl)prop-2-yn-1-yl)-*N*-((4'-methyl-[1,1'-biphenyl]-2-yl)ethynyl)methanesulfonamide (1aa)**

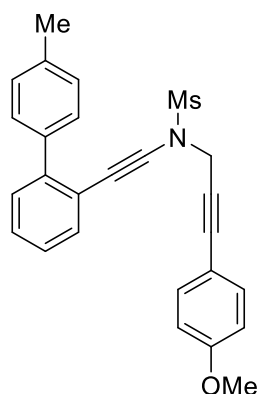

**1aa**

Compound **1aa** was prepared in 86% yield (369.4 mg) according to the general procedure S1 as a pale yellow oil. <sup>1</sup>H NMR (400 MHz, CDCl<sub>3</sub>) δ 7.57 – 7.48 (m, 3H), 7.39 – 7.29 (m, 4H), 7.28 – 7.23 (m, 1H), 7.16 (d, *J* = 8.0 Hz, 2H), 6.82 (d, *J* = 8.8 Hz, 2H), 4.45 (s, 2H), 3.77 (s, 3H), 2.95 (s, 3H), 2.30 (s, 3H); <sup>13</sup>C NMR (100 MHz, CDCl<sub>3</sub>) δ 160.0, 143.4, 137.5, 137.0, 133.3, 132.6, 129.2, 129.0, 128.6, 128.2, 126.7, 120.5, 114.0, 113.6, 86.7, 83.9, 80.2, 71.2, 55.2, 42.8, 38.3, 21.0; IR (neat): 3022, 2839, 2234, 1606, 1509, 1481, 1363, 1250, 1128, 963; HRESIMS Calcd for  $[C_{26}H_{23}NNaO_3S]^+$  ( $M + Na^+$ ) 452.1291, found 452.1279.

***N*-((4'-bromo-3,4,5,6-tetrahydro-[1,1'-biphenyl]-2-yl)ethynyl)-*N*-(3-(4-(dimethylamino)phenyl)prop-2-yn-1-yl)methanesulfonamide (1ab)**

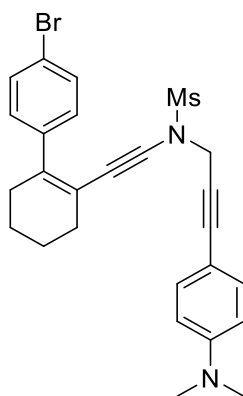

**1ab**

Compound **1ab** was prepared in 80% yield (383.6 mg) according to the general procedure S2 as a pale yellow oil.  $^1\text{H}$  NMR (400 MHz,  $\text{CDCl}_3$ )  $\delta$  7.45 – 7.30 (m, 4H), 7.30 – 7.21 (m, 2H), 6.62 (d,  $J = 8.8$  Hz, 2H), 4.39 (s, 2H), 2.98 (s, 6H), 2.89 (s, 3H), 2.44 – 2.25 (m, 4H), 1.83 – 1.64 (m, 4H);  $^{13}\text{C}$  NMR (100 MHz,  $\text{CDCl}_3$ )  $\delta$  150.5, 142.0, 141.6, 132.9, 130.9, 129.6, 120.6, 116.4, 111.7, 108.2, 87.9, 83.4, 79.4, 72.5, 43.2, 40.1, 38.0, 30.9, 30.6, 22.5, 22.2; IR (neat): 3045, 2860, 2213, 1604, 1521, 1446, 1373, 1226, 1133, 1053; HRESIMS Calcd for  $[\text{C}_{26}\text{H}_{27}\text{BrN}_2\text{NaO}_2\text{S}]^+$  ( $\text{M} + \text{Na}^+$ ) 533.0869, found 533.0861.

***N*-((4'-bromo-[1,1'-biphenyl]-2-yl)ethynyl)-*N*-(3-phenylprop-2-yn-1-yl)methanesulfonamide (1ac)**

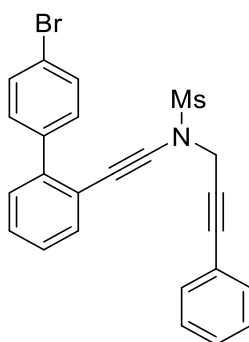

**1ac**

Compound **1ac** was prepared in 84% yield (390.0 mg) according to the general procedure S1 as a pale yellow oil.  $^1\text{H}$  NMR (400 MHz,  $\text{CDCl}_3$ )  $\delta$  7.57 – 7.52 (m, 1H), 7.49 – 7.43 (m, 4H), 7.41 – 7.26 (m, 8H), 4.47 (s, 2H), 2.98 (s, 3H);  $^{13}\text{C}$  NMR (100 MHz,  $\text{CDCl}_3$ )  $\delta$  142.1, 139.3, 132.7, 131.7, 131.1, 130.8, 129.1, 129.0, 128.4, 128.3,

127.4, 121.6, 121.5, 120.5, 86.8, 84.3, 81.4, 70.8, 42.6, 38.5; IR (neat): 3059, 2928, 2234, 1599, 1519, 1487, 1361, 1265, 1129, 1003; IR (neat): 3060, 3022, 2235, 1597, 1490, 1410, 1363, 1264, 1166, 1038; HRESIMS Calcd for  $[C_{24}H_{18}BrKNO_2S]^+$  ( $M + K^+$ ) 501.9873, found 501.9892.

***N*-((4'-bromo-[1,1'-biphenyl]-2-yl)ethynyl)-*N*-(3-(4-chlorophenyl)prop-2-yn-1-yl)methanesulfonamide (**1ad**)**

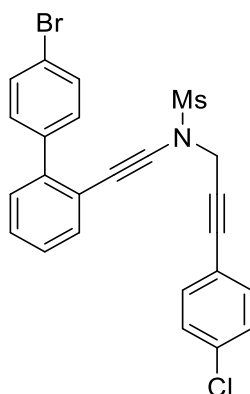

**1ad**

Compound **1ad** was prepared in 89% yield (443.9 mg) according to the general procedure S1 as a pale yellow oil.  $^1H$  NMR (400 MHz,  $CDCl_3$ )  $\delta$  7.59 (d,  $J = 7.2$  Hz, 1H), 7.55 – 7.47 (m, 4H), 7.42 – 7.36 (m, 3H), 7.35 – 7.28 (m, 4H), 4.52 (s, 2H), 3.03 (s, 3H);  $^{13}C$  NMR (100 MHz,  $CDCl_3$ )  $\delta$  142.1, 139.3, 135.1, 132.9, 132.7, 131.1, 130.8, 129.1, 128.8, 128.4, 127.4, 121.6, 120.4, 119.9, 85.6, 84.1, 82.5, 71.0, 42.5, 38.5; IR (neat): 3058, 2928, 2236, 1593, 1475, 1410, 1323, 1129, 1040, 920; HRESIMS Calcd for  $[C_{24}H_{17}BrClNaO_2S]^+$  ( $M + Na^+$ ) 519.9744, found 519.9750.

***N*-((4'-bromo-[1,1'-biphenyl]-2-yl)ethynyl)-*N*-(3-cyclohexylprop-2-yn-1-yl)methanesulfonamide (**1ae**)**

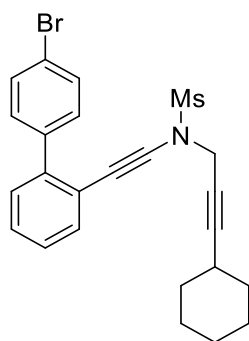

**1ae**

Compound **1ae** was prepared in 87% yield (408.0 mg) according to the general procedure S2 as a pale yellow oil.  $^1\text{H}$  NMR (500 MHz,  $\text{CDCl}_3$ )  $\delta$  7.54 (s, 1H), 7.52 (d,  $J = 9.5$  Hz, 2H), 7.46 (d,  $J = 8.5$  Hz, 2H), 7.35 – 7.30 (m, 2H), 7.30 – 7.25 (m, 1H), 4.22 (s, 2H), 2.95 (s, 3H), 2.44 – 2.19 (m, 1H), 1.78 – 1.68 (m, 2H), 1.68 – 1.56 (m, 2H), 1.53 – 1.42 (m, 1H), 1.40 – 1.29 (m, 2H), 1.30 – 1.19 (m, 3H).  $^{13}\text{C}$  NMR (125 MHz,  $\text{CDCl}_3$ )  $\delta$  141.7, 139.2, 132.5, 130.9, 130.7, 128.9, 128.1, 127.2, 121.4, 120.5, 91.8, 84.5, 72.3, 70.4, 42.2, 38.3, 32.2, 28.7, 25.5, 24.5. IR (neat): 2927, 2853, 2235, 1588, 1471, 1360, 1299, 1162, 1072, 967; HRESIMS Calcd for  $[\text{C}_{24}\text{H}_{24}\text{BrKNO}_2\text{S}]^+$  (M +  $\text{K}^+$ ) 508.0343, found 508.0347.

***N*-((3-(4-bromophenyl)furan-2-yl)ethynyl)-*N*-(3-(4-(dimethylamino)phenyl)prop-2-yn-1-yl)methanesulfonamide (1af)**

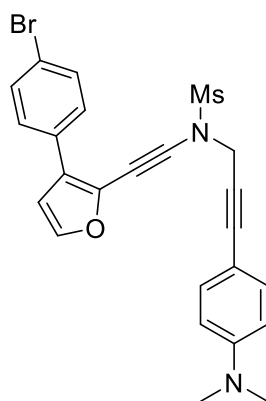

**1af**

Compound **1af** was prepared in 60% yield (298.4) according to the general procedure S1 as a pale yellow oil.  $^1\text{H}$  NMR (400 MHz,  $\text{CDCl}_3$ )  $\delta$  7.65 (d,  $J = 8.8$  Hz, 2H), 7.43 (d,  $J = 2.0$  Hz, 1H), 7.32 (d,  $J = 8.4$  Hz, 2H), 7.29 (d,  $J = 9.2$  Hz, 2H), 6.66 (d,  $J = 2.0$  Hz,



1H), 6.62 (d,  $J = 8.8$  Hz, 2H), 4.62 (s, 2H), 3.25 (s, 3H), 2.99 (s, 6H);  $^{13}\text{C}$  NMR (100 MHz,  $\text{CDCl}_3$ )  $\delta$  150.7, 144.3, 133.1, 132.3, 131.8, 130.8, 130.4, 128.4, 121.5, 111.8, 110.4, 107.8, 88.9, 88.7, 79.1, 62.8, 43.6, 40.1, 39.3; IR (neat): 2924, 2853, 2215, 1608, 1522, 1490, 1362, 1166, 1111, 1034; HRESIMS Calcd for  $[\text{C}_{24}\text{H}_{21}\text{BrKN}_2\text{O}_3\text{S}]^+$  ( $\text{M} + \text{K}^+$ ) 535.0088, found 535.0083.

***N*-((3-(4-bromophenyl)thiophen-2-yl)ethynyl)-*N*-(3-(4-(dimethylamino)phenyl)prop-2-yn-1-yl)methanesulfonamide (**1ag**)**

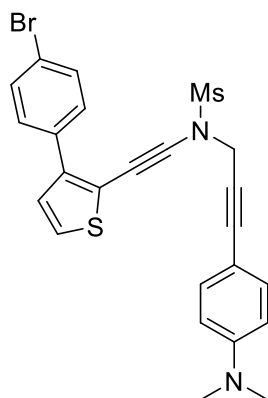

**1ag**

Compound **1ag** was prepared in 81% yield (430.5 mg) according to the general procedure S1 as a pale yellow oil.  $^1\text{H}$  NMR (400 MHz,  $\text{CDCl}_3$ )  $\delta$  7.76 – 7.57 (m, 2H), 7.44 – 7.34 (m, 2H), 7.31 – 7.20 (m, 3H), 7.14 (d,  $J = 5.6$  Hz, 1H), 6.62 (d,  $J = 8.8$  Hz, 2H), 4.57 (s, 2H), 3.17 (s, 3H), 2.98 (s, 6H);  $^{13}\text{C}$  NMR (100 MHz,  $\text{CDCl}_3$ )  $\delta$  150.7, 144.5, 134.1, 133.0, 131.5, 129.5, 127.6, 127.4, 121.7, 117.6, 111.8, 107.9, 88.5, 87.5, 79.2, 64.9, 43.5, 40.1, 39.0; IR (neat): 2925, 2214, 1608, 1523, 1486, 1444, 1362, 1190, 1063, 962; HRESIMS Calcd for  $[\text{C}_{24}\text{H}_{21}\text{BrKN}_2\text{O}_2\text{S}_2]^+$  ( $\text{M} + \text{K}^+$ ) 550.9859, found 550.9858.

***N*-(4-(4-bromophenyl)but-1-yn-1-yl)-*N*-(3-(4-(dimethylamino)phenyl)prop-2-yn-1-yl)methanesulfonamide (**1ah**)**

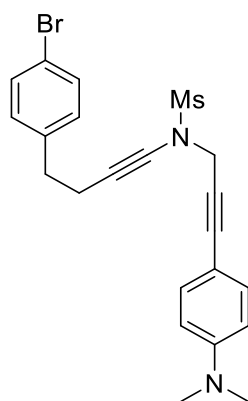

**1ah**

Compound **1ah** was prepared in 90% yield (413.0 mg) according to the general procedure S2 as a pale yellow oil.  $^1\text{H}$  NMR (400 MHz,  $\text{CDCl}_3$ )  $\delta$  7.32 (d,  $J = 8.4$  Hz, 2H), 7.29 (d,  $J = 8.8$  Hz, 2H), 7.09 (d,  $J = 8.4$  Hz, 2H), 6.60 (d,  $J = 9.2$  Hz, 2H), 4.38 (s, 2H), 3.03 (s, 3H), 2.93 (s, 6H), 2.80 – 2.70 (m, 2H), 2.62 – 2.45 (m, 2H);  $^{13}\text{C}$  NMR (100 MHz,  $\text{CDCl}_3$ )  $\delta$  150.3, 139.2, 132.7, 131.1, 130.2, 119.8, 111.5, 107.9, 87.8, 79.2, 73.7, 69.5, 42.9, 39.8, 37.7, 34.1, 20.2; IR (neat): 2925, 2861, 2211, 1608, 1522, 1487, 1359, 1226, 1164, 1070; HRESIMS Calcd for  $[\text{C}_{22}\text{H}_{23}\text{BrN}_2\text{NaO}_2\text{S}]^+$  ( $M + \text{Na}^+$ ) 481.0556, found 481.0554.

***N*-(3-(4-(dimethylamino)phenyl)prop-2-yn-1-yl)-*N*-(4-(4-fluorophenyl)but-1-yn-1-yl)methanesulfonamide (1ai)**

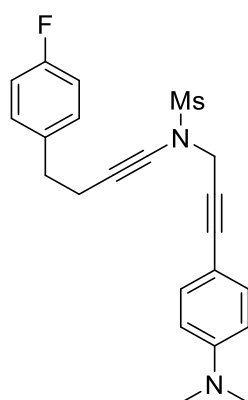

**1ai**

Compound **1ai** was prepared in 88% yield (350.4 mg) according to the general procedure S2 as a pale yellow oil.  $^1\text{H}$  NMR (500 MHz,  $\text{CDCl}_3$ )  $\delta$  7.29 (d,  $J = 8.0$  Hz, 2H), 7.19 – 7.09 (m, 2H), 6.93 – 6.87 (m, 2H), 6.60 (d,  $J = 8.5$  Hz, 2H), 4.38 (s, 2H),

3.04 (s, 3H), 2.93 (s, 6H), 2.77 (t,  $J = 6.5$  Hz, 2H), 2.57 (t,  $J = 6.5$  Hz, 2H);  $^{13}\text{C}$  NMR (125 MHz,  $\text{CDCl}_3$ )  $\delta$  161.2 (d,  $J = 242.5$  Hz), 150.3, 135.9 (d,  $J = 3.8$  Hz), 132.7, 129.9 (d,  $J = 7.5$  Hz), 114.7 (d,  $J = 21.3$  Hz), 111.4, 107.9, 87.7, 79.2, 73.6, 69.6, 42.9, 39.7, 37.6, 33.9, 20.5;  $^{19}\text{F}$  NMR (376 MHz,  $\text{CDCl}_3$ )  $\delta$  -116.98; IR (neat): 2928, 2251, 2211, 1610, 1508, 1446, 1364, 1221, 1159, 1095 HRESIMS Calcd for  $[\text{C}_{22}\text{H}_{23}\text{FN}_2\text{NaO}_2\text{S}]^+$  ( $\text{M} + \text{Na}^+$ ) 421.1356, found 421.1343.

***N*-(3-(4-methoxyphenyl)prop-2-yn-1-yl)-*N*-(((1*S*,2*R*)-2-phenylcyclopropyl)ethynyl)methanesulfonamide (**1aj**)**

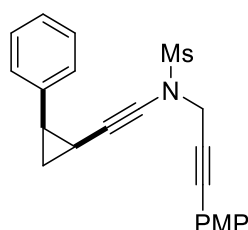

**1aj**

Compound **1aj** was prepared in 91% yield (345.3 mg) according to the general procedure S2 as a pale yellow oil.  $^1\text{H}$  NMR (400 MHz,  $\text{CDCl}_3$ )  $\delta$  7.34 (d,  $J = 8.8$  Hz, 2H), 7.26 – 7.19 (m, 2H), 7.17 – 7.04 (m, 3H), 6.84 (d,  $J = 8.8$  Hz, 2H), 4.30 (d,  $J = 18.0$  Hz, 1H), 4.15 (d,  $J = 18.0$  Hz, 1H), 3.74 (s, 3H), 2.60 (s, 3H), 2.30 (dd,  $J = 15.2, 8.4$  Hz, 1H), 1.89 – 1.78 (m, 1H), 1.40 – 1.29 (m, 1H), 1.20 (dd,  $J = 12.0, 5.6$  Hz, 1H);  $^{13}\text{C}$  NMR (100 MHz,  $\text{CDCl}_3$ )  $\delta$  159.8, 137.5, 132.9, 128.2, 127.5, 125.8, 113.8, 113.5, 86.1, 80.2, 71.7, 71.3, 54.9, 42.4, 37.0, 23.7, 14.4, 8.9; IR (neat): 3011, 2932, 2246, 1606, 1509, 1458, 1359, 1259, 1162, 1032; HRESIMS Calcd for  $[\text{C}_{22}\text{H}_{21}\text{KNO}_3\text{S}]^+$  ( $\text{M} + \text{K}^+$ ) 418.0874, found 418.0868.

***N*-((2-(naphthalen-2-yl)phenyl)ethynyl)-*N*-(3-(4-(pyrrolidin-1-yl)phenyl)prop-2-yn-1-yl)methanesulfonamide (**3a**)**

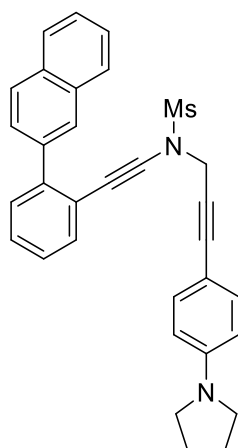

**3a**

Compound **3a** was prepared in 81% yield (408.8 mg) according to the general procedure S1 as a pale yellow oil.  $^1\text{H}$  NMR (400 MHz,  $\text{CDCl}_3$ )  $\delta$  8.06 (s, 1H), 7.94 – 7.86 (m, 1H), 7.85 – 7.73 (m, 3H), 7.58 (dd,  $J = 7.6, 1.2$  Hz, 1H), 7.50 – 7.41 (m, 3H), 7.40 – 7.34 (m, 1H), 7.33 – 7.25 (m, 1H), 7.17 (d,  $J = 8.8$  Hz, 2H), 6.38 (d,  $J = 8.8$  Hz, 2H), 4.40 (s, 2H), 3.30 – 3.18 (m, 4H), 2.77 (s, 3H), 2.04 – 1.87 (m, 4H);  $^{13}\text{C}$  NMR (100 MHz,  $\text{CDCl}_3$ )  $\delta$  147.9, 143.3, 138.0, 133.1, 133.0, 132.8, 132.5, 129.6, 128.3, 128.2, 128.0, 127.5(1), 127.4(8), 127.4, 127.1, 126.0, 126.0, 121.0, 111.2, 107.1, 88.5, 84.5, 79.0, 71.0, 47.4, 43.2, 38.3, 25.3;  $^{13}\text{C}$  NMR (100 MHz,  $\text{CDCl}_3$ )  $\delta$  133.0, 132.8, 129.6, 128.3, 128.2, 128.0, 127.5, 127.5, 127.4, 127.1, 126.0, 126.1, 111.2, 47.4, 43.2, 38.3, 25.3; IR (neat): 3053, 2929, 2233, 1607, 1520, 1462, 1361, 1266, 1166, 1034; HRESIMS Calcd for  $[\text{C}_{32}\text{H}_{28}\text{KN}_2\text{O}_2\text{S}]^+$  ( $\text{M} + \text{K}^+$ ) 543.1503, found 543.1518.

**4-methyl-*N*-((2-(naphthalen-2-yl)phenyl)ethynyl)-*N*-(3-(4-(pyrrolidin-1-yl)phenyl)prop-2-yn-1-yl)benzenesulfonamide (3b)**

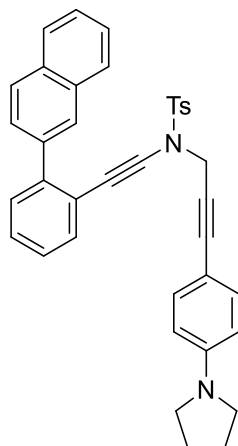

### 3b

Compound **3b** was prepared in 88% yield (511.1 mg) according to the general procedure S1 as a pale yellow oil.  $^1\text{H}$  NMR (400 MHz,  $\text{CDCl}_3$ )  $\delta$  8.04 (s, 1H), 7.94 – 7.82 (m, 1H), 7.82 – 7.76 (m, 3H), 7.55 (d,  $J = 8.4$  Hz, 1H), 7.49 (d,  $J = 8.4$  Hz, 2H), 7.47 – 7.42 (m, 3H), 7.37 – 7.31 (m, 1H), 7.31 – 7.25 (m, 1H), 6.98 (d,  $J = 8.4$  Hz, 2H), 6.85 (d,  $J = 8.0$  Hz, 2H), 6.35 (d,  $J = 8.8$  Hz, 2H), 4.39 (s, 2H), 3.27 – 3.19 (m, 4H), 2.21 (s, 3H), 2.01 – 1.91 (m, 4H);  $^{13}\text{C}$  NMR (100 MHz,  $\text{CDCl}_3$ )  $\delta$  147.7, 144.3, 142.9, 138.1, 134.3, 133.2, 132.9(4), 132.9(1), 132.6, 129.7, 129.2, 128.3, 127.9, 127.8, 127.6, 127.5, 127.4, 127.0, 125.9(3), 125.8(8), 121.4, 111.0, 107.7, 87.9, 85.1, 78.6, 70.7, 47.4, 43.1, 25.4, 21.4; IR (neat): 3051, 2965, 2230, 1607, 1521, 1461, 1367, 1187, 1090, 814; HRESIMS Calcd for  $[\text{C}_{38}\text{H}_{32}\text{N}_2\text{NaO}_2\text{S}]^+$  ( $\text{M} + \text{Na}^+$ ) 603.2077, found 603.2072.

### *N*-((2-(naphthalen-2-yl)phenyl)ethynyl)-*N*-(3-(4-(pyrrolidin-1-yl)phenyl)prop-2-yn-1-yl)benzenesulfonamide (3c)

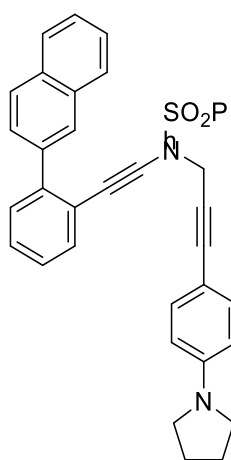

### 3c

Compound **3c** was prepared in 76% yield (430.7 mg) according to the general procedure S1 as a pale yellow oil.  $^1\text{H}$  NMR (400 MHz,  $\text{CDCl}_3$ )  $\delta$  8.03 (s, 1H), 7.94 – 7.85 (m, 1H), 7.83 – 7.69 (m, 3H), 7.60 (d,  $J = 7.2$  Hz, 2H), 7.54 (d,  $J = 7.2$  Hz, 1H), 7.50 – 7.40 (m, 3H), 7.39 – 7.23 (m, 3H), 7.14 – 6.86 (m, 4H), 6.35 (d,  $J = 8.4$  Hz, 2H), 4.42 (s, 2H), 3.42 – 3.09 (m, 4H), 2.07 – 1.83 (m, 4H);  $^{13}\text{C}$  NMR (100 MHz,  $\text{CDCl}_3$ )  $\delta$  147.7, 142.9, 138.1, 137.1, 133.2, 132.9, 132.6, 129.7, 128.5, 128.3, 127.9(4), 127.8(7), 127.8, 127.6, 127.5(4), 127.4(5), 127.0, 126.0, 125.9, 121.3, 111.1, 107.5, 88.0, 84.8, 78.5, 70.8, 47.4,

43.2, 25.3; IR (neat): 3054, 2967, 2231, 1608, 1522, 1447, 1368, 1172, 1089, 920;  
HRESIMS Calcd for  $[C_{37}H_{30}N_2NaO_2S]^+$  ( $M + Na^+$ ) 589.1920, found 589.1913

**4-bromo-*N*-((2-(naphthalen-2-yl)phenyl)ethynyl)-*N*-(3-(4-(pyrrolidin-1-yl)phenyl)prop-2-yn-1-yl)benzenesulfonamide (3d)**

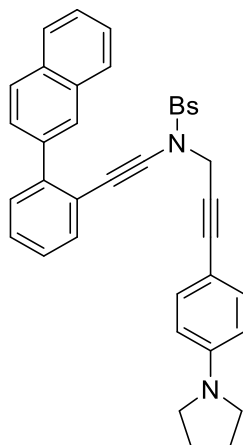

**3d**

Compound **3d** was prepared in 90% yield (581.0 mg) according to the general procedure S1 as a pale yellow oil.  $^1H$  NMR (400 MHz,  $CDCl_3$ )  $\delta$  8.03 (s, 1H), 7.92 – 7.85 (m, 1H), 7.84 – 7.76 (m, 2H), 7.73 (dd,  $J = 8.8, 1.6$  Hz, 1H), 7.54 (d,  $J = 7.6$  Hz, 1H), 7.50 – 7.41 (m, 3H), 7.39 – 7.31 (m, 3H), 7.31 – 7.24 (m, 1H), 7.09 (d,  $J = 8.8$  Hz, 2H), 6.94 (d,  $J = 8.8$  Hz, 2H), 6.36 (d,  $J = 8.7$  Hz, 2H), 4.42 (s, 2H), 3.31 – 3.16 (m, 4H), 2.04 – 1.87 (m, 4H);  $^{13}C$  NMR (100 MHz,  $CDCl_3$ )  $\delta$  147.7, 143.1, 138.1, 136.3, 133.1, 132.9(0), 132.8(7), 132.5, 131.8, 129.7, 129.2, 128.6, 128.3, 128.1, 127.9, 127.6, 127.5, 127.0, 126.1, 121.1, 111.2, 107.2, 88.3, 84.5, 78.3, 70.9, 47.4, 43.4, 25.3; IR (neat): 3054, 2970, 2232, 1607, 1540, 1456, 1373, 1263, 1123, 1037; HRESIMS Calcd for  $[C_{37}H_{29}BrN_2NaO_2S]^+$  ( $M + Na^+$ ) 667.1025, found 667.1023.

**4-methoxy-*N*-((2-(naphthalen-2-yl)phenyl)ethynyl)-*N*-(3-(4-(pyrrolidin-1-yl)phenyl)prop-2-yn-1-yl)benzenesulfonamide (3e)**

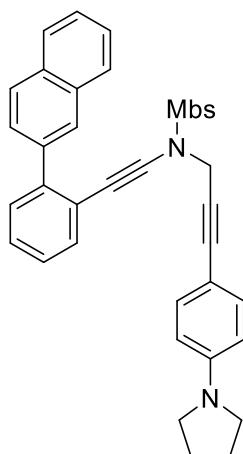

**3e**

Compound **3e** was prepared in 79% yield (471.4 mg) according to the general procedure S1 as a pale yellow oil.  $^1\text{H}$  NMR (400 MHz,  $\text{CDCl}_3$ )  $\delta$  8.04 (s, 1H), 7.95 – 7.87 (m, 1H), 7.86 – 7.76 (m, 3H), 7.58 – 7.48 (m, 3H), 7.47 – 7.41 (m, 3H), 7.38 – 7.30 (m, 1H), 7.30 – 7.23 (m, 1H), 6.99 (d,  $J = 8.8$  Hz, 2H), 6.48 (d,  $J = 8.8$  Hz, 2H), 6.34 (d,  $J = 8.8$  Hz, 2H), 4.39 (s, 2H), 3.61 (s, 3H), 3.31 – 3.11 (m, 4H), 2.04 – 1.85 (m, 4H);  $^{13}\text{C}$  NMR (100 MHz,  $\text{CDCl}_3$ )  $\delta$  163.3, 147.7, 142.7, 138.2, 133.2, 132.9, 132.8, 132.6, 130.1, 129.6, 128.7, 128.3, 127.9, 127.8, 127.7, 127.6, 127.5, 127.0, 126.0, 125.9, 121.5, 113.7, 111.0, 107.7, 87.9, 85.3, 78.7, 70.8, 55.4, 47.4, 43.1, 25.4; IR (neat): 3054, 2967, 2230, 1608, 1521, 1441, 1367, 1263, 1164, 1090; HRESIMS Calcd for  $[\text{C}_{38}\text{H}_{32}\text{N}_2\text{NaO}_3\text{S}]^+$  ( $\text{M} + \text{Na}^+$ ) 619.2026, found 619.2028.

***N*-((4-fluoro-2-(naphthalen-2-yl)phenyl)ethynyl)-*N*-(3-(4-(pyrrolidin-1-yl)phenyl)prop-2-yn-1-yl)methanesulfonamide (3f)**

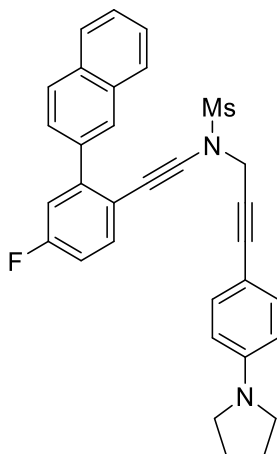

### 3f

Compound **3f** was prepared in 88% yield (459.9 mg) according to the general procedure S1 as a pale yellow oil.  $^1\text{H}$  NMR (400 MHz,  $\text{CDCl}_3$ )  $\delta$  8.05 (s, 1H), 7.94 – 7.86 (m, 1H), 7.84 – 7.70 (m, 3H), 7.62 – 7.52 (m, 1H), 7.49 – 7.40 (m, 2H), 7.27 – 7.12 (m, 3H), 7.07 – 6.94 (m, 1H), 6.38 (d,  $J = 8.8$  Hz, 2H), 4.41 (s, 2H), 3.51 – 3.03 (m, 4H), 2.77 (s, 3H), 2.14 – 1.79 (m, 4H);  $^{13}\text{C}$  NMR (100 MHz,  $\text{CDCl}_3$ )  $\delta$  162.2 (d,  $J = 248.0$  Hz), 147.9, 145.8 (d,  $J = 8.0$  Hz), 136.9 (d,  $J = 1.0$  Hz), 134.8 (d,  $J = 9.0$  Hz), 133.0(1), 132.9(9), 132.7, 128.4, 128.1, 127.6, 127.5, 127.1, 126.3, 126.2, 117.1 (d,  $J = 3.0$  Hz), 116.6 (d,  $J = 23.0$  Hz), 114.3 (d,  $J = 22.0$  Hz), 111.3, 107.0, 88.5, 84.0, 78.9, 70.0, 47.4, 43.2, 38.4, 25.3;  $^{19}\text{F}$  NMR (376 MHz,  $\text{CDCl}_3$ )  $\delta$  -111.9 (s); IR (neat): 3052, 2968, 2235, 1607, 1521, 1462, 1362, 1265, 1118, 964; HRESIMS Calcd for  $[\text{C}_{32}\text{H}_{27}\text{FN}_2\text{NaO}_2\text{S}]^+$  ( $\text{M} + \text{Na}^+$ ) 545.1669, found 545.1663.

### *N*-((4-chloro-2-(naphthalen-2-yl)phenyl)ethynyl)-*N*-(3-(4-(pyrrolidin-1-yl)phenyl)prop-2-yn-1-yl)methanesulfonamide (**3g**)

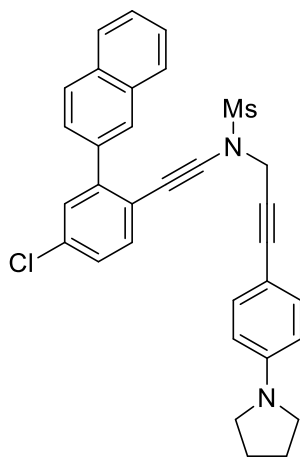

### 3g

Compound **3g** was prepared in 86% yield (463.6 mg) according to the general procedure S1 as a pale yellow oil.  $^1\text{H}$  NMR (400 MHz,  $\text{CDCl}_3$ )  $\delta$  8.04 (s, 1H), 7.95 – 7.85 (m, 1H), 7.85 – 7.76 (m, 2H), 7.72 (d,  $J = 8.4$  Hz, 1H), 7.54 – 7.40 (m, 4H), 7.27 (dd,  $J = 8.4, 2.0$  Hz, 1H), 7.16 (d,  $J = 8.4$  Hz, 2H), 6.38 (d,  $J = 8.8$  Hz, 2H), 4.40 (s, 2H), 3.41 – 3.03 (m, 4H), 2.77 (s, 3H), 2.05 – 1.83 (m, 4H);  $^{13}\text{C}$  NMR (100 MHz,  $\text{CDCl}_3$ )  $\delta$  147.9, 144.7, 136.6, 133.8(4), 133.8(0), 133.0, 132.9, 132.6, 129.5, 128.3, 128.0,



127.6, 127.5, 127.1, 127.0, 126.2(4), 126.1(5), 119.5, 111.2, 106.9, 88.6, 85.3, 78.8, 70.1, 47.3, 43.1, 38.4, 25.3; IR (neat): 3053, 2928, 2231, 1607, 1520, 1463, 1361, 1265, 1162, 1032; HRESIMS Calcd for  $[C_{32}H_{28}ClN_2O_2S]^+$  ( $M + H^+$ ) 539.1555, found 539.1551.

***N*-((4-methyl-2-(naphthalen-2-yl)phenyl)ethynyl)-*N*-(3-(4-(pyrrolidin-1-yl)phenyl)prop-2-yn-1-yl)methanesulfonamide (3h)**

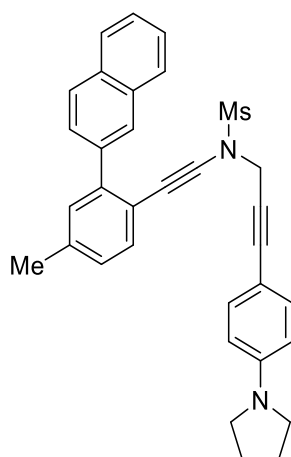

**3h**

Compound **3h** was prepared in 78% yield (404.6 mg) according to the general procedure S1 as a pale yellow oil.  $^1H$  NMR (400 MHz,  $CDCl_3$ )  $\delta$  8.05 (s, 1H), 7.93 – 7.85 (m, 1H), 7.83 – 7.71 (m, 3H), 7.49 (d,  $J = 8.0$  Hz, 1H), 7.47 – 7.39 (m, 2H), 7.30 (s, 1H), 7.20 – 7.03 (m, 3H), 6.39 (d,  $J = 8.7$  Hz, 2H), 4.41 (s, 2H), 3.39 – 3.08 (m, 4H), 2.76 (s, 3H), 2.41 (s, 3H), 2.06 – 1.91 (m, 4H);  $^{13}C$  NMR (100 MHz,  $CDCl_3$ )  $\delta$  147.9, 143.5, 138.4, 138.2, 133.2, 133.1, 132.9, 132.5, 130.4, 128.3, 128.0, 127.9, 127.6, 127.5, 127.4, 126.0, 125.9, 118.0, 111.3, 107.2, 88.4, 83.8, 79.1, 70.9, 47.4, 43.3, 38.3, 25.4, 21.4; IR (neat): 2927, 2846, 2237, 1608, 1521, 1460, 1362, 1264, 1165, 1032; HRESIMS Calcd for  $[C_{33}H_{31}N_2O_2S]^+$  ( $M + H^+$ ) 519.2101, found 519.2111.

***N*-((4-methoxy-2-(naphthalen-2-yl)phenyl)ethynyl)-*N*-(3-(4-(pyrrolidin-1-yl)phenyl)prop-2-yn-1-yl)methanesulfonamide (3i)**

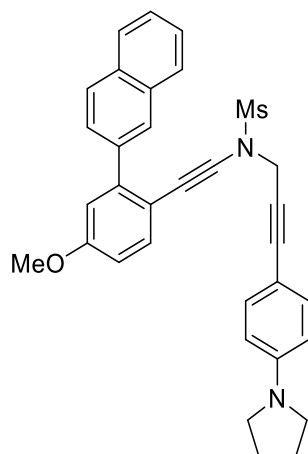

**3i**

Compound **3i** was prepared in 88% yield (470.5 mg) according to the general procedure S1 as a pale yellow oil.  $^1\text{H}$  NMR (400 MHz,  $\text{CDCl}_3$ )  $\delta$  8.06 (s, 1H), 7.93 – 7.84 (m, 1H), 7.83 – 7.60 (m, 3H), 7.53 (d,  $J = 8.8$  Hz, 1H), 7.49 – 7.32 (m, 2H), 7.17 (d,  $J = 8.8$  Hz, 2H), 7.01 (d,  $J = 2.7$  Hz, 1H), 6.87 (dd,  $J = 8.8, 2.8$  Hz, 1H), 6.40 (d,  $J = 8.8$  Hz, 2H), 4.41 (s, 2H), 3.84 (s, 3H), 3.41 – 3.03 (m, 4H), 2.74 (s, 3H), 2.18 – 1.78 (m, 4H);  $^{13}\text{C}$  NMR (100 MHz,  $\text{CDCl}_3$ )  $\delta$  159.6, 147.9, 145.5, 138.0, 134.8, 133.1, 133.0, 132.5, 128.3, 128.0, 127.5(0), 127.4(6), 127.4, 126.1, 126.0, 115.1, 113.1, 113.0, 111.3, 107.2, 88.3, 82.9, 79.1, 70.6, 55.4, 47.4, 43.3, 38.2, 25.4; IR (neat): 3055, 2967, 2210, 1606, 1521, 1463, 1361, 1268, 1165, 1034; HRESIMS Calcd for  $[\text{C}_{33}\text{H}_{31}\text{N}_2\text{O}_3\text{S}]^+$  ( $\text{M} + \text{H}^+$ ) 535.2050, found 535.2029.

***N*-((5-fluoro-2-(naphthalen-2-yl)phenyl)ethynyl)-*N*-(3-(4-(pyrrolidin-1-yl)phenyl)prop-2-yn-1-yl)methanesulfonamide (3j)**

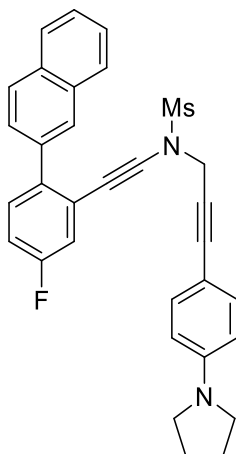

### 3j

Compound **3j** was prepared in 93% yield (486.0 mg) according to the general procedure S1 as a pale yellow oil.  $^1\text{H}$  NMR (400 MHz,  $\text{CDCl}_3$ )  $\delta$  8.01 (s, 1H), 7.93 – 7.85 (m, 1H), 7.85 – 7.76 (m, 2H), 7.71 (dd,  $J = 8.8, 1.6$  Hz, 1H), 7.50 – 7.36 (m, 3H), 7.27 (dd,  $J = 9.2, 2.8$  Hz, 1H), 7.17 (d,  $J = 8.8$  Hz, 2H), 7.11 – 7.00 (m, 1H), 6.39 (d,  $J = 8.7$  Hz, 2H), 4.39 (s, 2H), 3.34 – 3.11 (m, 4H), 2.77 (s, 3H), 2.05 – 1.80 (m, 4H);  $^{13}\text{C}$  NMR (100 Hz,  $\text{CDCl}_3$ )  $\delta$  161.5 (d,  $J = 245.0$  Hz), 148.0, 139.5 (d,  $J = 3.0$  Hz), 137.1, 133.1, 133.0, 132.5, 131.2 (d,  $J = 8.0$  Hz), 128.3, 128.0, 127.5(4), 127.4(9), 127.4, 126.1, 126.0, 122.8 (d,  $J = 10.0$  Hz), 118.9 (d,  $J = 23.0$  Hz), 115.4 (d,  $J = 21.0$  Hz), 111.3, 107.0, 88.6, 85.4, 78.8, 70.3, 47.4, 43.2, 38.5, 25.3;  $^{19}\text{F}$  NMR (376 MHz,  $\text{CDCl}_3$ )  $\delta$  -115.5 (s); IR (neat): 3052, 2965, 2237, 1607, 1577, 1462, 1323, 1166, 1035, 967; HRESIMS Calcd for  $[\text{C}_{32}\text{H}_{27}\text{FKN}_2\text{O}_2\text{S}]^+$  ( $\text{M} + \text{K}^+$ ) 561.1409, found 561.1420.

### *N*-((5-chloro-2-(naphthalen-2-yl)phenyl)ethynyl)-*N*-(3-(4-(pyrrolidin-1-yl)phenyl)prop-2-yn-1-yl)methanesulfonamide (**3k**)

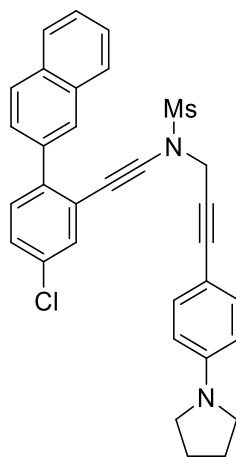

### 3k

Compound **3k** was prepared in 86% yield (463.6 mg) according to the general procedure S1 as a pale yellow oil.  $^1\text{H}$  NMR (400 MHz,  $\text{CDCl}_3$ )  $\delta$  8.04 (d,  $J = 1.4$  Hz, 1H), 7.92 – 7.87 (m, 1H), 7.83 (d,  $J = 8.4$  Hz, 1H), 7.83 – 7.78 (m, 1H), 7.72 (dd,  $J = 8.4, 1.6$  Hz, 1H), 7.56 (d,  $J = 2.4$  Hz, 1H), 7.49 – 7.44 (m, 2H), 7.40 (d,  $J = 8.4$  Hz, 1H), 7.34 (dd,  $J = 8.4, 2.4$  Hz, 1H), 7.18 (d,  $J = 8.8$  Hz, 2H), 6.40 (d,  $J = 9.2$  Hz, 2H), 4.41 (s, 2H), 3.35 – 3.19 (m, 4H), 2.80 (s, 3H), 2.06 – 1.89 (m, 4H);  $^{13}\text{C}$  NMR (100 MHz,

CDCl<sub>3</sub>)  $\delta$  148.0, 141.6, 136.8, 133.1, 133.0, 132.9, 132.6, 132.1, 130.8, 128.3(3), 128.2(8), 128.0, 127.6, 127.5, 127.2, 126.2, 122.7, 111.3, 107.0, 88.7, 85.6, 78.8, 70.1, 47.4, 43.2, 38.6, 25.4; IR (neat): 3054, 2928, 2233, 1608, 1521, 1461, 1363, 1323, 1166, 1034; HRESIMS Calcd for [C<sub>32</sub>H<sub>27</sub>ClN<sub>2</sub>NaO<sub>2</sub>S]<sup>+</sup> (M + Na<sup>+</sup>) 561.1374, found 561.1380.

***N*-((5-methyl-2-(naphthalen-2-yl)phenyl)ethynyl)-*N*-(3-(4-(pyrrolidin-1-yl)phenyl)prop-2-yn-1-yl)methanesulfonamide (3l)**

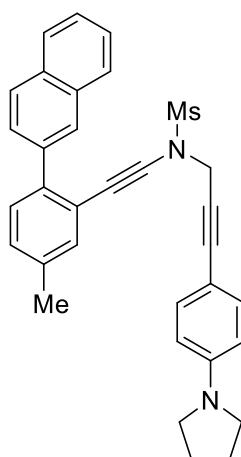

**3l**

Compound **3l** was prepared in 90% yield (466.8 mg) according to the general procedure S1 as a pale yellow oil. <sup>1</sup>H NMR (400 MHz, CDCl<sub>3</sub>)  $\delta$  8.05 (s, 1H), 7.94 – 7.85 (m, 1H), 7.84 – 7.69 (m, 3H), 7.52 – 7.39 (m, 3H), 7.38 (d, *J* = 7.6 Hz, 1H), 7.26 – 7.12 (m, 3H), 6.39 (d, *J* = 8.4 Hz, 2H), 4.41 (s, 2H), 3.33 – 3.13 (m, 4H), 2.80 (s, 3H), 2.36 (s, 3H), 2.11 – 1.85 (m, 4H); <sup>13</sup>C NMR (100 MHz, CDCl<sub>3</sub>)  $\delta$  147.9, 140.5, 138.0, 137.9, 133.3, 133.2, 133.0, 132.4, 129.5, 129.2, 128.3, 127.9, 127.6, 127.5, 127.4, 126.0, 125.9, 120.7, 111.3, 107.2, 88.5, 84.2, 79.0, 71.2, 47.4, 43.3, 38.3, 25.4, 20.8; IR (neat): 3049, 2926, 2234, 1608, 1522, 1460, 1363, 1266, 1166, 1036; HRESIMS Calcd for [C<sub>33</sub>H<sub>30</sub>N<sub>2</sub>NaO<sub>2</sub>S]<sup>+</sup> (M + Na<sup>+</sup>) 541.1920, found 541.1909.

***N*-((5-methoxy-2-(naphthalen-2-yl)phenyl)ethynyl)-*N*-(3-(4-(pyrrolidin-1-yl)phenyl)prop-2-yn-1-yl)methanesulfonamide (3m)**

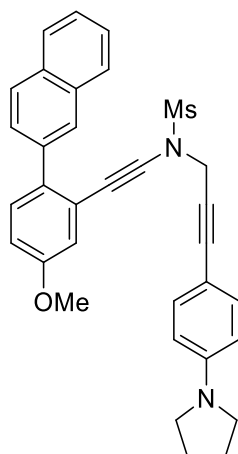

**3m**

Compound **3m** was prepared in 82% yield (438.4 mg) according to the general procedure S1 as a pale yellow oil.  $^1\text{H}$  NMR (400 MHz,  $\text{CDCl}_3$ )  $\delta$  8.03 (s, 1H), 7.92 – 7.85 (m, 1H), 7.84 – 7.71 (m, 3H), 7.47 – 7.41 (m, 2H), 7.39 (d,  $J = 8.4$  Hz, 1H), 7.17 (d,  $J = 8.8$  Hz, 2H), 7.10 (d,  $J = 2.4$  Hz, 1H), 6.95 (dd,  $J = 8.4, 2.8$  Hz, 1H), 6.39 (d,  $J = 8.8$  Hz, 2H), 4.42 (s, 2H), 3.82 (s, 3H), 3.33 – 3.13 (m, 4H), 2.79 (s, 3H), 2.06 – 1.86 (m, 4H);  $^{13}\text{C}$  NMR (100 MHz,  $\text{CDCl}_3$ )  $\delta$  158.5, 148.0, 137.8, 136.1, 133.2, 133.0, 132.3, 130.8, 128.2, 127.8, 127.7, 127.5, 127.4, 126.0, 125.8, 121.8, 116.9, 115.2, 111.3, 107.1, 88.5, 84.3, 79.0, 71.1, 55.4, 47.4, 43.3, 38.4, 25.4; IR (neat): 3052, 2968, 2236, 1605, 1560, 1462, 1362, 1226, 1166, 1043; HRESIMS Calcd for  $[\text{C}_{33}\text{H}_{30}\text{N}_2\text{NaO}_3\text{S}]^+$  ( $\text{M} + \text{Na}^+$ ) 557.1869, found 557.1839.

***N*-((2-(5-methylnaphthalen-2-yl)phenyl)ethynyl)-*N*-(3-(4-(pyrrolidin-1-yl)phenyl)prop-2-yn-1-yl)methanesulfonamide (3n)**

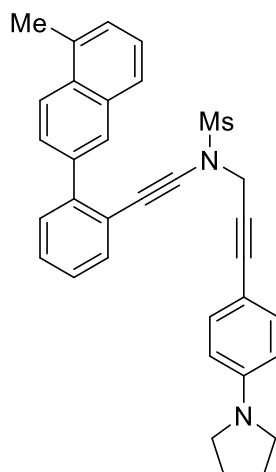

**3n**

Compound **3n** was prepared in 76% yield (394.2 mg) according to the general procedure S1 as a pale yellow oil.  $^1\text{H}$  NMR (400 MHz,  $\text{CDCl}_3$ )  $\delta$  8.07 (d,  $J = 1.6$  Hz, 1H), 7.95 (d,  $J = 8.8$  Hz, 1H), 7.86 – 7.78 (m, 1H), 7.76 (d,  $J = 8.0$  Hz, 1H), 7.59 (dd,  $J = 7.6, 0.8$  Hz, 1H), 7.48 (dd,  $J = 7.6, 0.8$  Hz, 1H), 7.40 – 7.26 (m, 4H), 7.17 (d,  $J = 8.8$  Hz, 2H), 6.38 (d,  $J = 8.4$  Hz, 2H), 4.41 (s, 2H), 3.29 – 3.06 (m, 4H), 2.78 (s, 3H), 2.62 (s, 3H), 2.04 – 1.77 (m, 4H);  $^{13}\text{C}$  NMR (100 MHz,  $\text{CDCl}_3$ )  $\delta$  147.9, 143.3, 137.7, 133.9, 133.2, 133.0, 132.9, 131.6, 129.6, 128.6, 128.2, 127.3, 127.0, 126.8, 126.7, 125.8, 123.8, 121.0, 111.2, 107.1, 88.5, 84.5, 79.0, 70.9, 47.4, 43.3, 38.4, 25.4, 19.3; IR (neat): 3048, 2967, 2232, 1608, 1521, 1461, 1362, 1166, 1034, 919; HRESIMS Calcd for  $[\text{C}_{33}\text{H}_{30}\text{N}_2\text{NaO}_2\text{S}]^+$  ( $\text{M} + \text{Na}^+$ ) 541.1920, found 541.1904.

***N*-((2-(5-methoxynaphthalen-2-yl)phenyl)ethynyl)-*N*-(3-(4-(pyrrolidin-1-yl)phenyl)prop-2-yn-1-yl)methanesulfonamide (3o)**

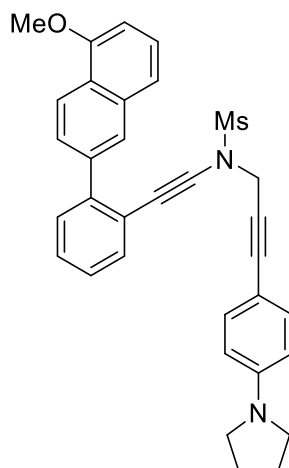

### 3o

Compound **3o** was prepared in 89% yield (475.9 mg) according to the general procedure S1 as a pale yellow oil. <sup>1</sup>H NMR (400 MHz, CDCl<sub>3</sub>) δ 8.27 (d, *J* = 8.8 Hz, 1H), 8.04 (d, *J* = 1.2 Hz, 1H), 7.74 (dd, *J* = 8.4, 1.6 Hz, 1H), 7.58 (dd, *J* = 7.6, 0.8 Hz, 1H), 7.52 – 7.46 (m, 2H), 7.43 – 7.27 (m, 3H), 7.16 (d, *J* = 8.4 Hz, 2H), 6.78 (d, *J* = 7.6 Hz, 1H), 6.38 (d, *J* = 8.8 Hz, 2H), 4.41 (s, 2H), 3.96 (s, 3H), 3.40 – 3.03 (m, 4H), 2.81 (s, 3H), 2.08 – 1.85 (m, 4H); <sup>13</sup>C NMR (100 MHz, CDCl<sub>3</sub>) δ 155.3, 147.9, 143.3, 138.5, 134.2, 133.0, 132.8, 129.6, 128.2, 127.7, 127.0, 126.7, 126.1, 124.6, 121.8, 121.0, 120.6, 111.2, 107.1, 103.9, 88.5, 84.5, 79.0, 71.0, 55.4, 47.4, 43.3, 38.4, 25.4; IR (neat): 3054, 2965, 2231, 1606, 1522, 1450, 1362, 1246, 1127, 963; HRESIMS Calcd for [C<sub>33</sub>H<sub>30</sub>N<sub>2</sub>NaO<sub>3</sub>S]<sup>+</sup> (M + Na<sup>+</sup>) 557.1869, found 557.1904.

### *N*-((2-(6-chloronaphthalen-2-yl)phenyl)ethynyl)-*N*-(3-(4-(pyrrolidin-1-yl)phenyl)prop-2-yn-1-yl)methanesulfonamide (**3p**)

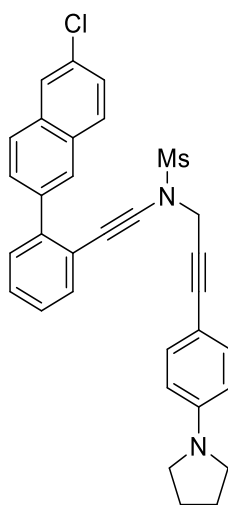

### 3p

Compound **3p** was prepared in 83% yield (447.5 mg) according to the general procedure S1 as a pale yellow oil. <sup>1</sup>H NMR (400 MHz, CDCl<sub>3</sub>) δ 8.04 (s, 1H), 7.86 – 7.75 (m, 2H), 7.77 – 7.68 (m, 2H), 7.60 (d, *J* = 7.2 Hz, 1H), 7.47 (d, *J* = 7.6 Hz, 1H), 7.43 – 7.29 (m, 3H), 7.15 (d, *J* = 8.4 Hz, 2H), 6.41 (d, *J* = 8.8 Hz, 2H), 4.43 (s, 2H), 3.39 – 3.14 (m, 4H), 2.82 (s, 3H), 2.10 – 1.96 (m, 4H); <sup>13</sup>C NMR (100 MHz, CDCl<sub>3</sub>) δ 147.9, 142.9, 138.3, 133.1, 133.0, 132.9(8), 131.6, 131.3, 129.9, 129.6, 128.6, 128.3,

127.9, 127.3, 126.9, 126.6, 126.2, 120.9, 111.3, 107.0, 88.5, 84.6, 79.0, 70.8, 47.4, 43.3, 38.4, 25.4; IR (neat): 3052, 2927, 2232, 1607, 1522, 1461, 1363, 1265, 1166, 964; HRESIMS Calcd for  $[C_{32}H_{27}ClN_2NaO_2S]^+$  ( $M + Na^+$ ) 561.1374, found 561.1347.

***N*-((2-(6-ethylnaphthalen-2-yl)phenyl)ethynyl)-*N*-(3-(4-(pyrrolidin-1-yl)phenyl)prop-2-yn-1-yl)methanesulfonamide (3q)**

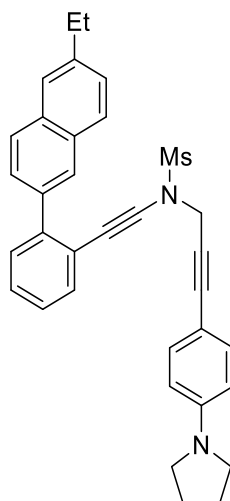

**3q**

Compound **3q** was prepared in 82% yield (436.8 mg) according to the general procedure S1 as a pale yellow oil.  $^1H$  NMR (400 MHz,  $CDCl_3$ )  $\delta$  8.03 (s, 1H), 7.83 (d,  $J = 8.4$  Hz, 1H), 7.81 – 7.72 (m, 2H), 7.59 (d,  $J = 8.0$  Hz, 2H), 7.49 (d,  $J = 7.6$  Hz, 1H), 7.43 – 7.36 (m, 1H), 7.35 – 7.28 (m, 2H), 7.18 (d,  $J = 8.8$  Hz, 2H), 6.41 (d,  $J = 8.4$  Hz, 2H), 4.43 (s, 2H), 3.43 – 3.21 (m, 4H), 2.90 – 2.60 (m, 5H), 2.12 – 1.90 (m, 4H), 1.32 (t,  $J = 7.6$  Hz, 3H);  $^{13}C$  NMR (100 MHz,  $CDCl_3$ )  $\delta$  147.9, 143.5, 141.9, 137.1, 133.0, 132.8, 131.6, 129.6, 128.2(0), 128.1(5), 127.7, 127.5, 127.3, 127.0, 126.9, 125.1, 120.9, 111.2, 107.1, 88.5, 84.4, 79.0, 71.0, 47.3, 43.2, 38.3, 29.0, 25.3, 15.4; IR (neat): 2964, 2927, 2232, 1608, 1522, 1486, 1363, 1186, 1035, 963; HRESIMS Calcd for  $[C_{34}H_{32}KN_2O_2S]^+$  ( $M + K^+$ ) 571.1816, found 571.1798.

***N*-((2-(6-methoxynaphthalen-2-yl)phenyl)ethynyl)-*N*-(3-(4-(pyrrolidin-1-yl)phenyl)prop-2-yn-1-yl)methanesulfonamide (3r)**



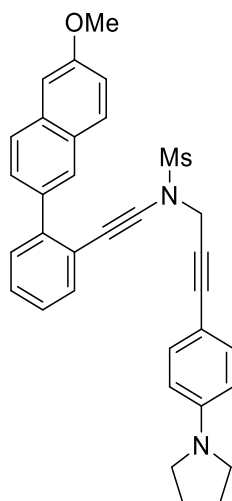

**3r**

Compound **3r** was prepared in 94% yield (502.6 mg) according to the general procedure S1 as a pale yellow oil.  $^1\text{H}$  NMR (400 MHz,  $\text{CDCl}_3$ )  $\delta$  8.00 (s, 1H), 7.78 (d,  $J = 9.2$  Hz, 1H), 7.76 – 7.69 (m, 2H), 7.57 (dd,  $J = 7.6, 0.8$  Hz, 1H), 7.46 (d,  $J = 7.2$  Hz, 1H), 7.40 – 7.34 (m, 1H), 7.32 – 7.27 (m, 1H), 7.16 (d,  $J = 8.8$  Hz, 2H), 7.13 – 7.05 (m, 2H), 6.37 (d,  $J = 8.8$  Hz, 2H), 4.42 (s, 2H), 3.88 (s, 3H), 3.33 – 3.09 (m, 4H), 2.80 (s, 3H), 2.02 – 1.82 (m, 4H);  $^{13}\text{C}$  NMR (100 MHz,  $\text{CDCl}_3$ )  $\delta$  157.7, 147.9, 143.5, 135.8, 133.7, 133.0, 132.8, 129.8, 129.5, 128.6, 128.2, 128.0, 127.8, 126.8, 126.3, 120.9, 118.8, 111.2, 107.1, 105.4, 88.4, 84.4, 79.0, 71.0, 55.2, 47.3, 43.2, 38.3, 25.3; IR (neat): 2963, 2848, 2232, 1603, 1522, 1462, 1362, 1264, 1186, 1032; HRESIMS Calcd for  $[\text{C}_{33}\text{H}_{31}\text{N}_2\text{O}_3\text{S}]^+$  ( $\text{M} + \text{H}^+$ ) 535.2050, found 535.2061.

***N*-((2-(7-bromonaphthalen-2-yl)phenyl)ethynyl)-*N*-(3-(4-(pyrrolidin-1-yl)phenyl)prop-2-yn-1-yl)methanesulfonamide (3s)**

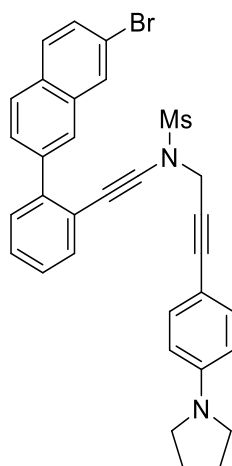

**3s**

Compound **3s** was prepared in 79% yield (461.0 mg) according to the general procedure S1 as a pale yellow oil.  $^1\text{H}$  NMR (500 MHz,  $\text{CDCl}_3$ )  $\delta$  8.06 (s, 1H), 7.93 (s, 1H), 7.84 – 7.73 (m, 2H), 7.65 (d,  $J = 8.5$  Hz, 1H), 7.59 (d,  $J = 7.5$  Hz, 1H), 7.51 (d,  $J = 8.5$  Hz, 1H), 7.45 (d,  $J = 7.5$  Hz, 1H), 7.41 – 7.36 (m, 1H), 7.36 – 7.30 (m, 1H), 7.11 (d,  $J = 8.5$  Hz, 2H), 6.38 (d,  $J = 8.5$  Hz, 2H), 4.44 (s, 2H), 3.37 – 3.18 (m, 4H), 2.85 (s, 3H), 2.06 – 1.86 (m, 4H);  $^{13}\text{C}$  NMR (125 MHz,  $\text{CDCl}_3$ )  $\delta$  147.9, 142.8, 139.2, 134.3, 133.0, 132.8, 130.9, 130.2, 129.6, 129.3, 129.2, 128.3, 128.1, 127.4, 127.3, 127.0, 121.0, 120.0, 111.2, 107.0, 88.5, 84.7, 78.9, 70.8, 47.4, 43.2, 38.5, 25.4; IR (neat): 3053, 2928, 2232, 1602, 1525, 1461, 1362, 1248, 1165, 1034; HRESIMS Calcd for  $[\text{C}_{32}\text{H}_{27}\text{BrN}_2\text{NaO}_2\text{S}]^+$  ( $\text{M} + \text{Na}^+$ ) 605.0869, found 605.0856.

***N*-((2-(7-methoxynaphthalen-2-yl)phenyl)ethynyl)-*N*-(3-(4-(pyrrolidin-1-yl)phenyl)prop-2-yn-1-yl)methanesulfonamide (3t)**

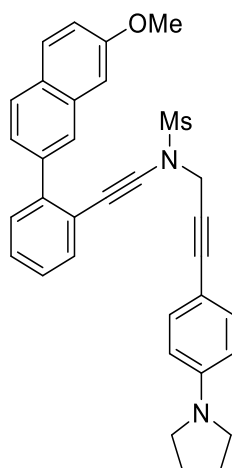

### 3t

Compound **3t** was prepared in 80% yield (427.7 mg) according to the general procedure S1 as a pale yellow oil.  $^1\text{H}$  NMR (400 MHz,  $\text{CDCl}_3$ )  $\delta$  8.02 (s, 1H), 7.75 (d,  $J = 8.4$  Hz, 1H), 7.69 (d,  $J = 8.8$  Hz, 1H), 7.63 – 7.55 (m, 2H), 7.49 (d,  $J = 7.6$  Hz, 1H), 7.43 – 7.36 (m, 1H), 7.34 – 7.28 (m, 1H), 7.25 (d,  $J = 2.4$  Hz, 1H), 7.18 (d,  $J = 8.4$  Hz, 2H), 7.12 (dd,  $J = 8.8, 2.4$  Hz, 1H), 6.39 (d,  $J = 8.8$  Hz, 2H), 4.42 (s, 2H), 3.85 (s, 3H), 3.35 – 3.08 (m, 4H), 2.81 (s, 3H), 2.08 – 1.85 (m, 4H);  $^{13}\text{C}$  NMR (100 MHz,  $\text{CDCl}_3$ )  $\delta$  157.8, 147.9, 143.4, 138.5, 134.3, 133.0, 132.7, 129.6, 129.0, 128.1, 128.0, 127.3, 127.0, 125.3, 121.0, 119.0, 111.2, 107.1, 106.1, 88.5, 84.5, 79.1, 71.1, 55.2, 47.4, 43.3, 38.4, 25.4; IR (neat): 3051, 2965, 2209, 1608, 1459, 1366, 1213, 1124, 1030, 946; HRESIMS Calcd for  $[\text{C}_{33}\text{H}_{30}\text{N}_2\text{NaO}_3\text{S}]^+$  ( $\text{M} + \text{Na}^+$ ) 557.1869, found 557.1891.

### *N*-((2-(7-phenylnaphthalen-2-yl)phenyl)ethynyl)-*N*-(3-(4-(pyrrolidin-1-yl)phenyl)prop-2-yn-1-yl)methanesulfonamide (**3u**)

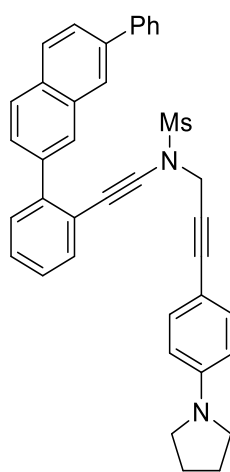

### 3u

Compound **3u** was prepared in 75% yield (435.6 mg) according to the general procedure S1 as a pale yellow oil.  $^1\text{H}$  NMR (400 MHz,  $\text{CDCl}_3$ )  $\delta$  8.14 (s, 1H), 8.11 (s, 1H), 7.89 – 7.82 (m, 2H), 7.80 – 7.69 (m, 4H), 7.60 (dd,  $J = 7.6, 1.2$  Hz, 1H), 7.47 – 7.42 (m, 3H), 7.41 – 7.30 (m, 3H), 7.11 (d,  $J = 8.8$  Hz, 2H), 6.33 (d,  $J = 8.8$  Hz, 2H), 4.41 (s, 2H), 3.22 – 3.09 (m, 4H), 2.83 (s, 3H), 1.96 – 1.86 (m, 4H);  $^{13}\text{C}$  NMR (100 MHz,  $\text{CDCl}_3$ )  $\delta$  147.9, 143.3, 140.8, 138.6, 138.5, 133.4, 133.0, 132.7, 131.7, 129.6, 128.8, 128.3, 128.2, 128.1, 127.7, 127.3(1), 127.2(6), 127.2, 127.1, 126.1, 125.7, 121.0,

111.2, 107.0, 88.5, 84.6, 79.0, 70.9, 47.3, 43.3, 38.4, 25.3; IR (neat): 3056, 2967, 2232, 1607, 1522, 1460, 1363, 1265, 1166, 1034; HRESIMS Calcd for  $[C_{38}H_{32}N_2NaO_2S]^+$  ( $M + Na^+$ ) 603.2077, found 603.2054.

***N*-((2-(8-methylnaphthalen-2-yl)phenyl)ethynyl)-*N*-(3-(4-(pyrrolidin-1-yl)phenyl)prop-2-yn-1-yl)methanesulfonamide (3v)**

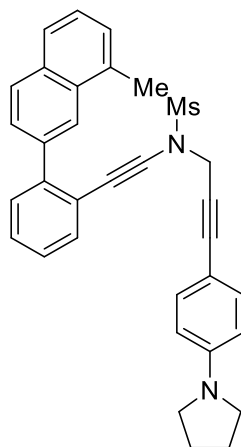

**3v**

Compound **3v** was prepared in 76% yield (394.1 mg) according to the general procedure S1 as a pale yellow oil.  $^1H$  NMR (400 MHz,  $CDCl_3$ )  $\delta$  8.08 (s, 1H), 7.87 – 7.73 (m, 2H), 7.65 (d,  $J = 7.6$  Hz, 1H), 7.60 (d,  $J = 7.6$  Hz, 1H), 7.48 (d,  $J = 7.6$  Hz, 1H), 7.44 – 7.27 (m, 4H), 7.13 (d,  $J = 8.8$  Hz, 2H), 6.39 (d,  $J = 8.4$  Hz, 2H), 4.39 (s, 2H), 3.38 – 3.12 (m, 4H), 2.76 (s, 3H), 2.71 (s, 3H), 2.06 – 1.86 (m, 4H);  $^{13}C$  NMR (100 MHz,  $CDCl_3$ )  $\delta$  147.9, 144.1, 138.2, 134.6, 133.0, 132.8, 132.6, 132.4, 129.8, 128.2, 127.9, 127.3, 127.1, 126.8, 126.0, 125.7, 124.4, 121.2, 111.2, 107.2, 88.4, 84.5, 79.0, 70.9, 47.4, 43.3, 38.3, 25.4, 19.4; IR (neat): 3050, 2920, 2232, 1607, 1521, 1486, 1362, 1186, 1032, 961, 918; HRESIMS Calcd for  $[C_{33}H_{30}N_2NaO_2S]^+$  ( $M + Na^+$ ) 541.1920, found 541.1903.

***N*-((2-(8-methoxynaphthalen-2-yl)phenyl)ethynyl)-*N*-(3-(4-(pyrrolidin-1-yl)phenyl)prop-2-yn-1-yl)methanesulfonamide (3w)**

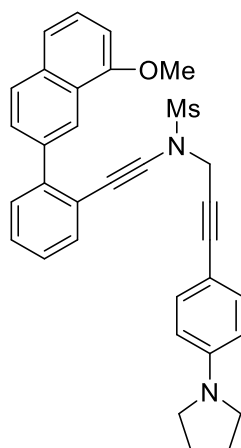

**3w**

Compound **3w** was prepared in 88% yield (470.5 mg) according to the general procedure S1 as a pale yellow oil.  $^1\text{H}$  NMR (400 MHz,  $\text{CDCl}_3$ )  $\delta$  8.42 (s, 1H), 7.85 (dd,  $J = 8.4, 1.6$  Hz, 1H), 7.77 (d,  $J = 8.4$  Hz, 1H), 7.58 (d,  $J = 6.8$  Hz, 1H), 7.50 (d,  $J = 7.2$  Hz, 1H), 7.43 – 7.34 (m, 3H), 7.33 – 7.26 (m, 1H), 7.12 (d,  $J = 8.4$  Hz, 2H), 6.80 (dd,  $J = 6.4, 1.6$  Hz, 1H), 6.38 (d,  $J = 8.8$  Hz, 2H), 4.43 (s, 2H), 3.97 (s, 3H), 3.38 – 3.00 (m, 4H), 2.86 (s, 3H), 2.16 – 1.87 (m, 4H);  $^{13}\text{C}$  NMR (100 MHz,  $\text{CDCl}_3$ )  $\delta$  155.6, 147.9, 143.8, 137.5, 133.6, 133.0, 132.8, 129.8, 128.2, 128.1, 127.0, 126.1, 125.3, 122.2, 121.0, 119.9, 111.2, 107.2, 103.9, 88.3, 84.5, 79.0, 70.9, 55.4, 47.4, 43.2, 38.5, 25.4; IR (neat): 3053, 2968, 2229, 1607, 1544, 1460, 1363, 1272, 1165, 1068; HRESIMS Calcd for  $[\text{C}_{33}\text{H}_{30}\text{N}_2\text{NaO}_3\text{S}]^+$  ( $\text{M} + \text{Na}^+$ ) 557.1869, found 557.1853.

***N*-(3-(4-(dimethylamino)phenyl)prop-2-yn-1-yl)-*N*-((2-(naphthalen-2-yl)phenyl)ethynyl)methanesulfonamide (3x)**

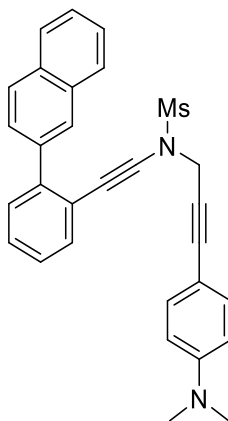

**3x**

Compound **3x** was prepared in 85% yield (406.8 mg) according to the general procedure S1 as a pale yellow oil.  $^1\text{H}$  NMR (400 MHz,  $\text{CDCl}_3$ )  $\delta$  7.95 (s, 1H), 7.81 – 7.73 (m, 1H), 7.73 – 7.62 (m, 3H), 7.47 (d,  $J = 7.6$  Hz, 1H), 7.39 – 7.29 (m, 3H), 7.28 – 7.23 (m, 1H), 7.22 – 7.16 (m, 1H), 7.06 (d,  $J = 8.0$  Hz, 2H), 6.41 (d,  $J = 8.8$  Hz, 2H), 4.29 (s, 2H), 2.79 (s, 6H), 2.66 (s, 3H);  $^{13}\text{C}$  NMR (100 MHz,  $\text{CDCl}_3$ )  $\delta$  150.4, 143.3, 137.9, 133.1, 132.9, 132.8, 132.4, 129.6, 128.2, 128.1, 128.0, 127.6, 127.5, 127.4, 127.0, 126.1, 126.0, 120.9, 111.5, 108.0, 88.1, 84.4, 79.2, 70.9, 43.1, 39.9, 38.3; IR (neat): 3052, 2925, 2232, 1608, 1524, 1445, 1323, 1266, 1166, 1035; HRESIMS Calcd for  $[\text{C}_{30}\text{H}_{26}\text{KN}_2\text{O}_2\text{S}]^+$  ( $\text{M} + \text{K}^+$ ) 517.1347, found 517.1355.

***N*-(3-(4-(dibenzylamino)phenyl)prop-2-yn-1-yl)-*N*-((2-(naphthalen-2-yl)phenyl)ethynyl)methanesulfonamide (3y)**

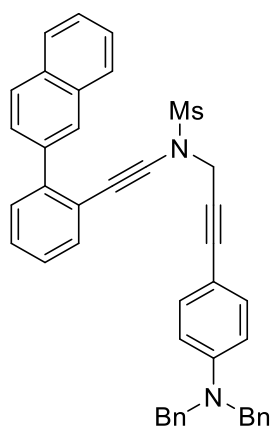

**3y**

Compound **3y** was prepared in 80% yield (555.1 mg) according to the general procedure S1 as a pale yellow oil.  $^1\text{H}$  NMR (400 MHz,  $\text{CDCl}_3$ )  $\delta$  8.03 (s, 1H), 7.91 – 7.81 (m, 1H), 7.80 – 7.68 (m, 3H), 7.57 (d,  $J = 7.6$  Hz, 1H), 7.46 (d,  $J = 6.8$  Hz, 1H), 7.43 – 7.35 (m, 3H), 7.33 – 7.21 (m, 7H), 7.21 – 7.14 (m, 4H), 7.06 (d,  $J = 8.8$  Hz, 2H), 6.57 (d,  $J = 9.2$  Hz, 2H), 4.63 (s, 4H), 4.38 (s, 2H), 2.75 (s, 3H);  $^{13}\text{C}$  NMR (100 MHz,  $\text{CDCl}_3$ )  $\delta$  149.3, 143.4, 138.1, 137.7, 133.1, 132.9, 132.5, 129.6, 128.7, 128.3, 128.2, 128.0, 127.5(4), 127.4(9), 127.4, 127.1(0), 127.0(8), 126.4, 126.0(4), 125.9(9), 121.0, 112.0, 108.8, 87.9, 84.4, 79.4, 71.0, 54.1, 43.1, 38.3; IR (neat): 3060, 2928, 2230, 1608,

1519, 1452, 1361, 1236, 1166, 1030; HRESIMS Calcd for  $[C_{42}H_{34}N_2NaO_2S]^+$  ( $M + Na^+$ ) 653.2233, found 653.2248.

***N*-((2-(naphthalen-2-yl)cyclohex-1-en-1-yl)ethynyl)-*N*-(3-(4-(pyrrolidin-1-yl)phenyl)prop-2-yn-1-yl)methanesulfonamide (3z)**

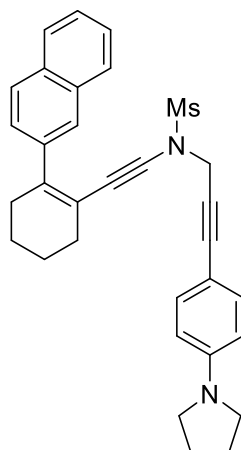

**3z**

Compound **3z** was prepared in 66% yield (335.7 mg) according to the general procedure S2 as a pale yellow oil.  $^1H$  NMR (400 MHz,  $CDCl_3$ )  $\delta$  7.92 (s, 1H), 7.86 – 7.79 (m, 1H), 7.77 – 7.66 (m, 2H), 7.62 (d,  $J = 8.4$  Hz, 1H), 7.44 – 7.33 (m, 2H), 7.17 (d,  $J = 8.8$  Hz, 2H), 6.40 (d,  $J = 8.8$  Hz, 2H), 4.34 (s, 2H), 3.33 – 3.16 (m, 4H), 2.66 (s, 3H), 2.59 – 2.48 (m, 2H), 2.43 – 2.32 (m, 2H), 2.03 – 1.93 (m, 4H), 1.87 – 1.66 (m, 4H);  $^{13}C$  NMR (100 MHz,  $CDCl_3$ )  $\delta$  147.9, 143.1, 140.2, 133.1, 133.0, 132.4, 128.2, 127.4, 127.1, 126.5, 126.3, 125.8, 125.6, 116.3, 111.3, 107.3, 88.2, 83.1, 79.1, 72.8, 47.4, 43.2, 37.8, 31.0, 30.9, 25.4, 22.7, 22.3; IR (neat): 3049, 2928, 2212, 1608, 1521, 1461, 1321, 1165, 1056, 962; HRESIMS Calcd for  $[C_{32}H_{32}N_2NaO_2S]^+$  ( $M + Na^+$ ) 531.2077, found 531.2079.

***N*-((2-(naphthalen-1-yl)phenyl)ethynyl)-*N*-(3-(4-(pyrrolidin-1-yl)phenyl)prop-2-yn-1-yl)methanesulfonamide (3aa)**

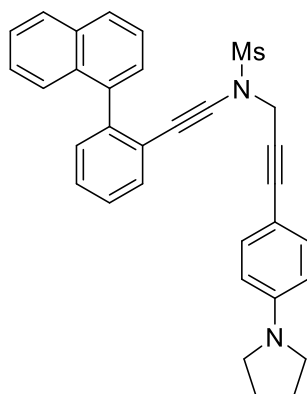

**3aa**

Compound **3aa** was prepared in 90% yield (454.1 mg) according to the general procedure S1 as a pale yellow oil.  $^1\text{H}$  NMR (400 MHz,  $\text{CDCl}_3$ )  $\delta$  7.87 – 7.81 (m, 1H), 7.81 – 7.74 (m, 1H), 7.65 – 7.56 (m, 2H), 7.49 – 7.44 (m, 2H), 7.44 – 7.35 (m, 5H), 7.15 (d,  $J = 8.8$  Hz, 2H), 6.45 (d,  $J = 8.8$  Hz, 2H), 4.20 – 3.85 (m, 2H), 3.43 – 3.03 (m, 4H), 2.41 (s, 3H), 2.13 – 1.90 (m, 4H);  $^{13}\text{C}$  NMR (100 MHz,  $\text{CDCl}_3$ )  $\delta$  147.9, 142.7, 138.8, 133.4, 133.1, 131.8, 131.7, 130.4, 128.0, 127.8, 127.4, 126.3, 126.0, 125.7, 125.4, 122.9, 111.2, 107.4, 88.0, 84.9, 78.7, 70.4, 47.5, 43.1, 37.8, 25.4; IR (neat): 3048, 2843, 2232, 1605, 1524, 1461, 1360, 1265, 1164, 1035; HRESIMS Calcd for  $[\text{C}_{32}\text{H}_{28}\text{N}_2\text{NaO}_2\text{S}]^+$  ( $\text{M} + \text{Na}^+$ ) 527.1764, found 527.1780.

***N*-(3-(4-methoxyphenyl)prop-2-yn-1-yl)-*N*-((2-(naphthalen-2-yl)phenyl)ethynyl)methanesulfonamide (3ab)**

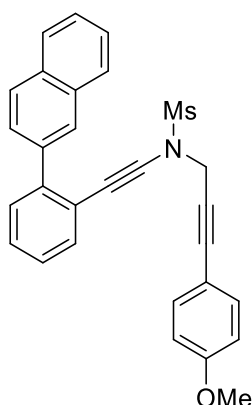

**3ab**

Compound **3ab** was prepared in 89% yield (395.7 mg) according to the general procedure S1 as a pale yellow oil.  $^1\text{H}$  NMR (400 MHz,  $\text{CDCl}_3$ )  $\delta$  8.04 (s, 1H), 7.92 –



7.83 (m, 1H), 7.83 – 7.68 (m, 3H), 7.58 (d,  $J = 7.6$  Hz, 1H), 7.48 – 7.38 (m, 3H), 7.38 – 7.32 (m, 1H), 7.32 – 7.24 (m, 1H), 7.18 (d,  $J = 8.8$  Hz, 2H), 6.73 (d,  $J = 8.8$  Hz, 2H), 4.38 (s, 2H), 3.72 (s, 3H), 2.76 (s, 3H);  $^{13}\text{C}$  NMR (100 MHz,  $\text{CDCl}_3$ )  $\delta$  159.9, 143.3, 137.9, 133.2, 133.0, 132.7, 132.4, 129.6, 128.3, 128.2, 127.9, 127.4(2), 127.4(1), 127.3, 127.0, 126.0(1), 125.9(7), 120.8, 113.9, 113.5, 86.8, 84.2, 80.1, 71.1, 55.1, 42.7, 38.2; IR (neat): 3057, 2939, 2233, 1605, 1568, 1464, 1324, 1251, 1164, 1033; HRESIMS Calcd for  $[\text{C}_{29}\text{H}_{23}\text{NNaO}_3\text{S}]^+$  ( $\text{M} + \text{Na}^+$ ) 488.1291, found 488.1295.

***N*-(3-(4-(dimethylamino)phenyl)prop-2-yn-1-yl)-*N*-((2-(naphthalen-2-yl)thiophen-3-yl)ethynyl)methanesulfonamide (3ac)**

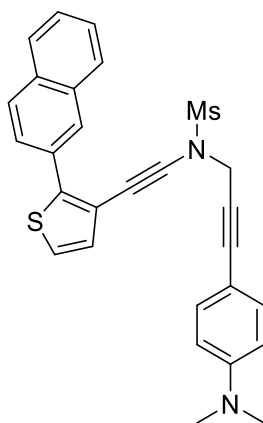

**3ac**

Compound **3ac** was prepared in 90% yield (436.2 mg) according to the general procedure S1 as a pale yellow oil.  $^1\text{H}$  NMR (500 MHz,  $\text{CDCl}_3$ )  $\delta$  8.36 (s, 1H), 7.96 (dd,  $J = 8.5, 2.0$  Hz, 1H), 7.93 – 7.88 (m, 1H), 7.80 – 7.66 (m, 2H), 7.43 – 7.39 (m, 2H), 7.23 – 7.16 (m, 3H), 7.14 (d,  $J = 5.5$  Hz, 1H), 6.48 (d,  $J = 9.0$  Hz, 2H), 4.56 (s, 2H), 3.13 (s, 3H), 2.90 (s, 6H);  $^{13}\text{C}$  NMR (125 MHz,  $\text{CDCl}_3$ )  $\delta$  150.4, 145.9, 133.3, 132.9, 132.8, 132.0, 131.0, 128.4, 128.2, 127.5, 126.4(1), 126.3(6), 126.2, 125.8, 123.7, 116.9, 111.6, 107.9, 88.4, 83.6, 79.2, 67.3, 43.3, 40.0, 38.7; IR (neat): 3442, 2231, 1607, 1520, 1354, 1323, 1226, 1166, 1043, 965; HRESIMS Calcd for  $[\text{C}_{28}\text{H}_{24}\text{KN}_2\text{O}_2\text{S}_2]^+$  ( $\text{M} + \text{K}^+$ ) 523.0911, found 523.0907.

***N*-(3-(4-(dimethylamino)phenyl)prop-2-yn-1-yl)-*N*-((4-(naphthalen-2-yl)thiophen-3-yl)ethynyl)methanesulfonamide (3ad)**

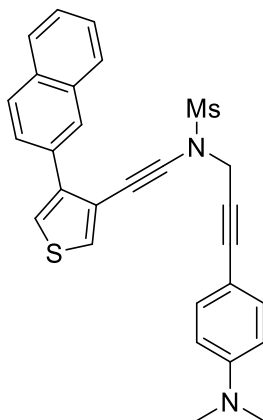

**3ad**

Compound **3ad** was prepared in 85% yield (411.9 mg) according to the general procedure S1 as a pale yellow oil.  $^1\text{H}$  NMR (500 MHz,  $\text{CDCl}_3$ )  $\delta$  8.19 (s, 1H), 7.92 – 7.85 (m, 1H), 7.80 (dd,  $J = 8.5, 1.5$  Hz, 1H), 7.79 – 7.72 (m, 2H), 7.58 (d,  $J = 3.5$  Hz, 1H), 7.47 – 7.38 (m, 2H), 7.36 (d,  $J = 3.5$  Hz, 1H), 7.15 (d,  $J = 9.0$  Hz, 2H), 6.49 (d,  $J = 9.0$  Hz, 2H), 4.51 (s, 2H), 3.00 (s, 3H), 2.91 (s, 6H);  $^{13}\text{C}$  NMR (125 MHz,  $\text{CDCl}_3$ )  $\delta$  150.4, 143.4, 133.3, 132.9, 132.7, 132.6, 130.7, 128.2, 127.8, 127.5, 126.8, 126.4, 126.1, 125.9, 122.4, 120.6, 111.6, 108.0, 88.3, 83.1, 79.2, 66.6, 43.3, 40.0, 38.6; IR (neat): 2925, 2242, 2212, 1607, 1522, 1445, 1323, 1266, 1165, 1036; HRESIMS Calcd for  $[\text{C}_{28}\text{H}_{24}\text{KN}_2\text{O}_2\text{S}_2]^+$  ( $\text{M} + \text{K}^+$ ) 523.0911, found 523.0906.

***N*-(3-(4-(dimethylamino)phenyl)prop-2-yn-1-yl)-*N*-(4-(naphthalen-2-yl)but-1-yn-1-yl)methanesulfonamide (3ae)**

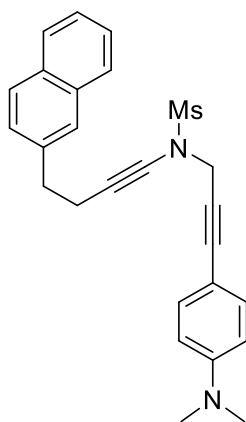

**3ae**

Compound **3ae** was prepared in 92% yield (396.1 mg) according to the general procedure S2 as a pale yellow oil. <sup>1</sup>H NMR (500 MHz, CDCl<sub>3</sub>) δ 7.75 – 7.71 (m, 1H), 7.71 – 7.67 (m, 2H), 7.65 (s, 1H), 7.41 – 7.31 (m, 3H), 7.26 (d, *J* = 9.0 Hz, 2H), 6.54 (d, *J* = 9.0 Hz, 2H), 4.37 (s, 2H), 2.99 – 2.93 (m, 2H), 2.91 (s, 3H), 2.87 (s, 6H), 2.71 – 2.61 (m, 2H); <sup>13</sup>C NMR (125 MHz, CDCl<sub>3</sub>) δ 150.3, 137.8, 133.3, 132.8, 131.9, 127.7, 127.4, 127.3, 127.0, 126.7, 125.7, 125.1, 111.5, 108.0, 87.8, 79.3, 73.6, 69.9, 43.0, 39.8, 37.6, 35.0, 20.4; IR (neat): 2926, 2858, 2213, 1608, 1523, 1445, 1359, 1272, 1191, 1045; HRESIMS Calcd for [C<sub>26</sub>H<sub>27</sub>N<sub>2</sub>O<sub>2</sub>S]<sup>+</sup> (M + H<sup>+</sup>) 431.1788, found 431.1787.

## 4. General Procedures for Copper-Catalyzed Controllable Cyclization of Diynes

### 4.1. General Procedure for Synthesis of Chiral Cycloheptatrienes **2**

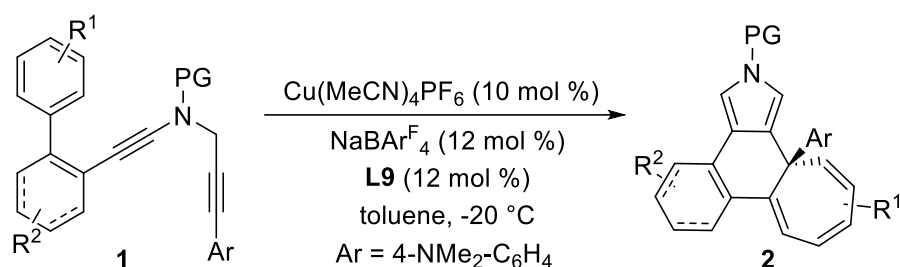

To an oven-dried Schlenk tube with a stir bar were sequentially added  $\text{Cu}(\text{MeCN})_4\text{PF}_6$  (0.01 mmol, 3.8 mg), **L9** (0.012 mmol, 8.8 mg) and  $\text{NaBAR}^{\text{F}_4}$  (0.012 mmol, 10.6 mg, white crystal) under argon atmosphere. After injecting toluene (1 mL) into the Schlenk tube, the mixture was stirred at  $25\text{ }^\circ\text{C}$  for 2 h. Then the mixture reaction was cooled to  $-20\text{ }^\circ\text{C}$ , and *N*-propargyl ynamide **1** (0.1 mmol) in toluene (1 mL) was added into the reaction mixture dropwise. The progress of the reaction was monitored by TLC. Upon completion, the reaction mixture was directly purified by column chromatography on silica gel (eluent: PE/EtOAc) to afford the desired chiral cycloheptatriene **2**.

#### (*S*)-4-(10-bromo-2-(methylsulfonyl)benzo[*e*]cyclohepta[*g*]isoindol-12a(2*H*)-yl)-*N,N*-dimethylaniline (**2a**)

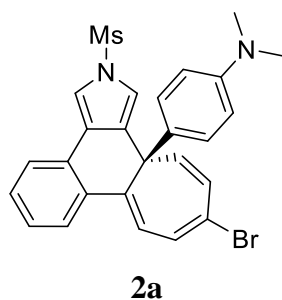

Compound **2a** was prepared in 95% yield (48.2 mg) according to the general procedure. Pale yellow solid (mp  $131\text{--}132\text{ }^\circ\text{C}$ ).  $[\alpha]_{\text{D}}^{25} = -221.1^\circ$  ( $c = 1.0$ ,  $\text{CHCl}_3$ ). 96% ee (determined by HPLC: Chiralpak IE Column, 40/60 *i*-PrOH/hexane, 1.0 mL/min, 254 nm; TR = 6.54 min (minor), 7.87 min (major)).  $^1\text{H}$  NMR (400 MHz,  $\text{CDCl}_3$ )  $\delta$  7.69 – 7.61 (m, 1H), 7.61 – 7.52 (m, 1H), 7.39 (d,  $J = 2.0$  Hz, 1H), 7.31 – 7.25 (m, 1H), 7.24 – 7.19 (m, 1H), 6.91 (d,  $J = 8.8$  Hz, 2H), 6.86 (d,  $J = 8.4$  Hz, 1H), 6.72 (d,  $J = 2.4$  Hz,

1H), 6.61 (dd,  $J = 8.0, 1.2$  Hz, 1H), 6.54 (d,  $J = 9.2$  Hz, 1H), 6.45 (d,  $J = 8.8$  Hz, 2H), 4.78 (d,  $J = 9.2$  Hz, 1H), 3.09 (s, 3H), 2.85 (s, 6H);  $^{13}\text{C}$  NMR (100 MHz,  $\text{CDCl}_3$ )  $\delta$  148.7, 132.8, 132.0, 131.9, 131.4, 128.0, 127.6(4), 127.6(1), 127.3, 127.0, 123.4, 122.2, 121.8, 121.7, 118.9, 113.1, 111.5, 109.9, 42.8(2), 42.7(6), 40.5; IR (neat): 2923, 1609, 1518, 1473, 1398, 1364, 1172, 1054, 984; HRESIMS Calcd for  $[\text{C}_{26}\text{H}_{23}\text{BrN}_2\text{NaO}_2\text{S}]^+$  ( $\text{M} + \text{Na}^+$ ) 529.0556, found 529.0568.

**(S)-4-(10-bromo-2-tosylbenzo[*e*]cyclohepta[*g*]isoindol-12a(2*H*)-yl)-*N,N*-dimethylaniline (2b)**

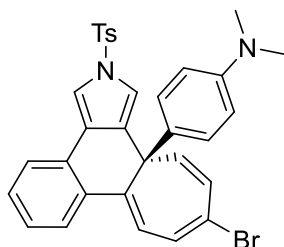

**2b**

Compound **2b** was prepared in 95% yield (55.4 mg) according to the general procedure. Pale yellow solid (mp 186–187 °C).  $[\alpha]_{\text{D}}^{25} = -134.6^\circ$  ( $c = 1.0, \text{CHCl}_3$ ). 95% ee (determined by HPLC: Chiralpak IE Column, 30/70 *i*-PrOH/hexane, 1.0 mL/min, 254 nm; TR = 10.05 min (minor), 14.83 min (major)).  $^1\text{H}$  NMR (500 MHz,  $\text{CDCl}_3$ )  $\delta$  7.62 (d,  $J = 8.5$  Hz, 2H), 7.58 (d,  $J = 8.0$  Hz, 1H), 7.54 (dd,  $J = 8.5, 1.0$  Hz, 1H), 7.38 (d,  $J = 2.5$  Hz, 1H), 7.24 – 7.13 (m, 4H), 6.86 (d,  $J = 8.5$  Hz, 2H), 6.82 (d,  $J = 8.0$  Hz, 1H), 6.76 (d,  $J = 2.0$  Hz, 1H), 6.60 (dd,  $J = 8.0, 1.0$  Hz, 1H), 6.51 (d,  $J = 9.0$  Hz, 1H), 6.43 (d,  $J = 9.0$  Hz, 2H), 4.73 (d,  $J = 9.0$  Hz, 1H), 2.85 (s, 6H), 2.35 (s, 3H);  $^{13}\text{C}$  NMR (125 MHz,  $\text{CDCl}_3$ )  $\delta$  148.7, 144.9, 135.9, 133.0, 132.0, 131.8, 129.9, 127.9, 127.5(3), 127.4(7), 127.4(4), 127.3(8), 127.3, 126.6, 123.5, 122.3, 122.0, 121.7, 119.6, 113.4, 113.0, 111.6, 111.1, 43.1, 40.6, 21.6; IR (neat): 3131, 2922, 1611, 1516, 1445, 1373, 1283, 1172, 1091, 982; HRESIMS Calcd for  $[\text{C}_{32}\text{H}_{27}\text{BrN}_2\text{NaO}_2\text{S}]^+$  ( $\text{M} + \text{Na}^+$ ) 605.0869, found 605.0860.

**(S)-4-(10-bromo-2-(phenylsulfonyl)benzo[*e*]cyclohepta[*g*]isoindol-12a(2*H*)-yl)-*N,N*-dimethylaniline (2c)**

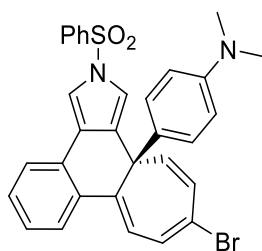

**2c**

Compound **2c** was prepared in 95% yield (54.1 mg) according to the general procedure. Pale yellow solid (mp 228–229 °C).  $[\alpha]_D^{25} = -155.0^\circ$  ( $c = 1.0$ ,  $\text{CHCl}_3$ ). 91% ee (determined by HPLC: Chiralpak IE Column, 30/70 *i*-PrOH/hexane, 1.0 mL/min, 254 nm; TR = 8.95 min (minor), 13.34 min (major)).  $^1\text{H}$  NMR (400 MHz,  $\text{CDCl}_3$ )  $\delta$  7.73 (d,  $J = 7.6$  Hz, 2H), 7.63 – 7.49 (m, 3H), 7.45 – 7.37 (m, 3H), 7.23 – 7.15 (m, 2H), 6.86 (d,  $J = 8.8$  Hz, 2H), 6.82 (d,  $J = 8.0$  Hz, 1H), 6.77 (d,  $J = 2.0$  Hz, 1H), 6.60 (dd,  $J = 8.0$ , 0.8 Hz, 1H), 6.51 (d,  $J = 9.2$  Hz, 1H), 6.43 (d,  $J = 8.8$  Hz, 2H), 4.72 (d,  $J = 9.2$  Hz, 1H), 2.85 (s, 6H);  $^{13}\text{C}$  NMR (100 MHz,  $\text{CDCl}_3$ )  $\delta$  148.7, 138.8, 133.7, 133.3, 132.0, 131.9, 131.7, 129.3, 128.0, 127.6, 127.4(3), 127.4(0), 127.2, 126.5, 123.5, 122.3, 122.1, 121.7, 119.7, 113.4, 112.7, 111.6, 110.9, 43.1, 40.6; IR (neat): 3129, 3027, 1610, 1516, 1477, 1372, 1216, 1173, 1054, 969; HRESIMS Calcd for  $[\text{C}_{31}\text{H}_{25}\text{BrN}_2\text{NaO}_2\text{S}]^+$  ( $\text{M} + \text{Na}^+$ ) 591.0712, found 591.0712.

**(S)-4-(10-bromo-2-((4-methoxyphenyl)sulfonyl)benzo[*e*]cyclohepta[*g*]isoindol-12a(2*H*)-yl)-*N,N*-dimethylaniline (2d)**

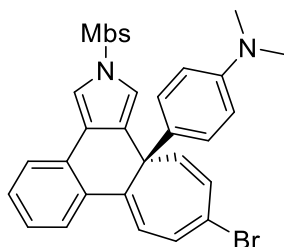

**2d**

Compound **2d** was prepared in 96% yield (57.6 mg) according to the general procedure. Pale yellow solid (mp 127–128 °C).  $[\alpha]_D^{25} = -157.6^\circ$  (c = 1.0, CHCl<sub>3</sub>). 92% ee (determined by HPLC: Chiralpak IE Column, 30/70 *i*-PrOH/hexane, 1.0 mL/min, 254 nm; TR = 11.94 min (minor), 18.65 min (major)). <sup>1</sup>H NMR (500 MHz, CDCl<sub>3</sub>) δ 7.68 (d, *J* = 9.0 Hz, 2H), 7.59 (d, *J* = 7.5 Hz, 1H), 7.55 (dd, *J* = 7.5, 1.0 Hz, 1H), 7.37 (d, *J* = 2.0 Hz, 1H), 7.25 – 7.14 (m, 2H), 6.96 – 6.84 (m, 4H), 6.83 (d, *J* = 8.0 Hz, 1H), 6.74 (d, *J* = 2.0 Hz, 1H), 6.61 (dd, *J* = 8.0, 1.0 Hz, 1H), 6.52 (d, *J* = 9.0 Hz, 1H), 6.44 (d, *J* = 8.5 Hz, 2H), 4.74 (d, *J* = 9.0 Hz, 1H), 3.81 (s, 3H), 2.86 (s, 6H); <sup>13</sup>C NMR (125 MHz, CDCl<sub>3</sub>) δ 163.7, 148.7, 132.9, 132.0, 131.8, 130.3, 129.0, 127.9, 127.6, 127.5, 127.4(4), 127.3(9), 127.3(7), 123.5, 122.3, 121.9, 121.7, 119.5, 114.5, 113.3, 111.6, 111.1, 55.6, 43.2, 40.6; IR (neat): 3132, 2924, 1610, 1517, 1459, 1370, 1264, 1165, 1053, 969; HRESIMS Calcd for [C<sub>32</sub>H<sub>27</sub>BrN<sub>2</sub>NaO<sub>3</sub>S]<sup>+</sup> (M + Na<sup>+</sup>) 621.0818, found 621.0866.

**(*S*)-4-(10-bromo-2-(mesitylsulfonyl)benzo[*e*]cyclohepta[*g*]isoindol-12a(2*H*)-yl)-*N,N*-dimethylaniline (**2e**)**

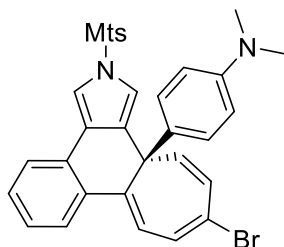

**2e**

Compound **2e** was prepared in 99% yield (60.5 mg) according to the general procedure. Pale yellow solid (mp 120–121 °C).  $[\alpha]_D^{25} = -170.9^\circ$  (c = 1.0, CHCl<sub>3</sub>). 95% ee (determined by HPLC: Chiralpak IE Column, 30/70 *i*-PrOH/hexane, 1.0 mL/min, 254 nm; TR = 9.48 min (minor), 11.96 min (major)). <sup>1</sup>H NMR (400 MHz, CDCl<sub>3</sub>) δ 7.65 – 7.56 (m, 1H), 7.50 (dd, *J* = 7.6, 1.6 Hz, 1H), 7.23 – 7.11 (m, 3H), 6.91 (s, 2H), 6.89 – 6.82 (m, 3H), 6.75 (d, *J* = 2.4 Hz, 1H), 6.63 (dd, *J* = 8.4, 1.2 Hz, 1H), 6.53 (d, *J* = 9.2 Hz, 1H), 6.42 (d, *J* = 8.8 Hz, 2H), 4.87 (d, *J* = 9.2 Hz, 1H), 2.84 (s, 6H), 2.46 (s, 6H), 2.27 (s, 3H); <sup>13</sup>C NMR (100 MHz, CDCl<sub>3</sub>) δ 148.8, 144.1, 140.2, 132.6, 132.3, 132.1, 131.6, 130.8, 127.9, 127.6, 127.4(8), 127.4(5), 127.2, 123.3, 122.5, 121.4, 120.7, 119.6,

115.7, 113.4, 112.4, 111.7, 43.7, 40.6, 22.6, 21.0; IR (neat): 2962, 2925, 1608, 1516, 1446, 1361, 1261, 1171, 1054, 812; HRESIMS Calcd for  $[C_{34}H_{31}BrN_2NaO_2S]^+$  ( $M + Na^+$ ) 633.1182, found 633.1174.

**(S)-4-(10-bromo-2-((4-bromophenyl)sulfonyl)benzo[e]cyclohepta[g]isoindol-12a(2H)-yl)-N,N-dimethylaniline (2f)**

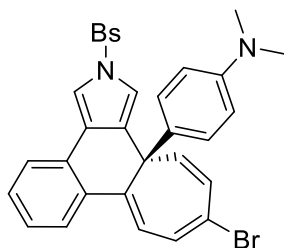

**2f**

Compound **2f** was prepared in 99% yield (64.2 mg) according to the general procedure. Pale yellow solid (mp 194–195 °C).  $[\alpha]_D^{25} = -156.1^\circ$  ( $c = 1.0$ ,  $CHCl_3$ ). 92% ee (determined by HPLC: Chiralpak IE Column, 30/70 *i*-PrOH/hexane, 1.0 mL/min, 254 nm; TR = 8.35 min (minor), 10.56 min (major)).  $^1H$  NMR (500 MHz,  $CDCl_3$ )  $\delta$  7.59 (d,  $J = 8.0$  Hz, 1H), 7.56–7.46 (m, 5H), 7.36 (d,  $J = 2.0$  Hz, 1H), 7.24–7.16 (m, 2H), 6.87–6.80 (m, 3H), 6.74 (d,  $J = 2.2$  Hz, 1H), 6.61 (dd,  $J = 8.5, 1.0$  Hz, 1H), 6.52 (d,  $J = 9.0$  Hz, 1H), 6.42 (d,  $J = 9.0$  Hz, 2H), 4.76 (d,  $J = 9.0$  Hz, 1H), 2.86 (s, 6H);  $^{13}C$  NMR (125 MHz,  $CDCl_3$ )  $\delta$  148.7, 137.6, 133.9, 132.6, 132.1, 131.9, 131.7, 128.9, 128.0, 127.7, 127.6, 127.5, 127.3, 127.0, 123.6, 122.6, 122.4, 121.8, 119.8, 113.4, 113.2, 111.5, 111.3, 43.2, 40.5; IR (neat): 3128, 2925, 1610, 1516, 1456, 1375, 1265, 1175, 1053, 813; HRESIMS Calcd for  $[C_{31}H_{24}Br_2N_2NaO_2S]^+$  ( $M + Na^+$ ) 668.9817, found 668.9850.

**(S)-4-(10-fluoro-2-(methylsulfonyl)benzo[e]cyclohepta[g]isoindol-12a(2H)-yl)-N,N-dimethylaniline (2g)**

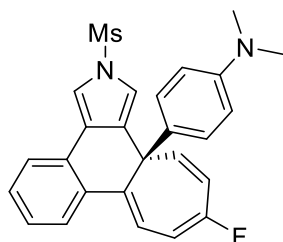



## 2g

Compound **2g** was prepared in 86% yield (38.4 mg) according to the general procedure. Pale yellow solid (mp 147–148 °C).  $[\alpha]_D^{25} = -92.7^\circ$  (c = 1.0, CHCl<sub>3</sub>). 97% ee (determined by HPLC: Chiralpak IE Column, 30/70 *i*-PrOH/hexane, 1.0 mL/min, 254 nm; TR = 7.17 min (minor), 8.63 min (major)). <sup>1</sup>H NMR (400 MHz, CDCl<sub>3</sub>) δ 7.75 – 7.61 (m, 1H), 7.61 – 7.49 (m, 1H), 7.38 (d, *J* = 2.0 Hz, 1H), 7.30 – 7.24 (m, 1H), 7.24 – 7.16 (m, 1H), 7.08 (dd, *J* = 8.4, 5.6 Hz, 1H), 6.94 (d, *J* = 8.8 Hz, 2H), 6.77 (d, *J* = 2.4 Hz, 1H), 6.42 (d, *J* = 8.8 Hz, 2H), 6.39 – 6.29 (m, 1H), 6.18 (ddd, *J* = 15.2, 8.4, 2.4 Hz, 1H), 5.28 (dd, *J* = 9.6, 5.6 Hz, 1H), 3.08 (s, 3H), 2.83 (s, 6H); <sup>13</sup>C NMR (100 MHz, CDCl<sub>3</sub>) δ 161.0 (d, *J* = 246.0 Hz), 148.7, 133.3, 132.6, 131.8, 127.7, 127.6, 127.3(0), 127.2(6), 126.9, 123.4, 121.9, 120.0 (d, *J* = 11.0 Hz), 118.9, 118.2 (d, *J* = 13.0 Hz), 116.2 (d, *J* = 3.0 Hz), 116.0 (d, *J* = 31.0 Hz), 113.6 (d, *J* = 28.0 Hz), 113.0, 111.4, 44.5, 42.7, 40.5; <sup>19</sup>F NMR (376 MHz, CDCl<sub>3</sub>) δ -104.7 – -105.4 (m); IR (neat): 2958, 2926, 1610, 1518, 1418, 1365, 1261, 1147, 1055, 984; HRESIMS Calcd for [C<sub>26</sub>H<sub>23</sub>FKN<sub>2</sub>O<sub>2</sub>S]<sup>+</sup> (M + K<sup>+</sup>) 485.1096, found 485.1080.

## (*S*)-4-(10-chloro-2-(methylsulfonyl)benzo[*e*]cyclohepta[*g*]isoindol-12a(2*H*)-yl)-*N,N*-dimethylaniline (**2h**)

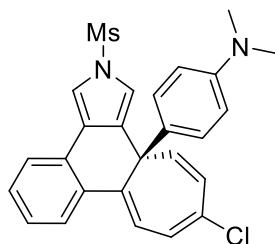

## 2h

Compound **2h** was prepared in 89% yield (41.2 mg) according to the general procedure. Pale yellow solid (mp 142–143 °C).  $[\alpha]_D^{25} = -249.2^\circ$  (c = 1.0, CHCl<sub>3</sub>). 93% ee (determined by HPLC: Chiralpak IE Column, 30/70 *i*-PrOH/hexane, 1.0 mL/min, 254 nm; TR = 7.14 min (minor), 8.65 min (major)). <sup>1</sup>H NMR (500 MHz, CDCl<sub>3</sub>) δ 7.67 – 7.56 (m, 2H), 7.39 (d, *J* = 2.5 Hz, 1H), 7.29 – 7.24 (m, 2H), 6.97 – 6.89 (m, 3H), 6.72 (d, *J* = 2.0 Hz, 1H), 6.45 (d, *J* = 9.0 Hz, 2H), 6.42 – 6.35 (m, 2H), 4.80 (d, *J* = 9.0 Hz, 1H), 3.08 (s, 3H), 2.85 (s, 6H); <sup>13</sup>C NMR (125 MHz, CDCl<sub>3</sub>) δ 148.7, 132.8, 132.7,

132.1, 131.4, 128.8, 127.9, 127.8, 127.7, 127.6, 127.0, 124.8, 123.4, 121.7, 121.6, 119.0, 113.2, 111.5, 108.1, 42.7, 42.4, 40.5; IR (neat): 3025, 2924, 1610, 1516, 1364, 1172, 1055, 984, 894; HRESIMS Calcd for  $[C_{26}H_{23}ClN_2NaO_2S]^+$  ( $M + Na^+$ ) 485.1061, found 485.1053.

**(S)-4-(9-fluoro-2-(methylsulfonyl)benzo[*e*]cyclohepta[*g*]isoindol-12a(2*H*)-yl)-*N,N*-dimethylaniline (2i)**

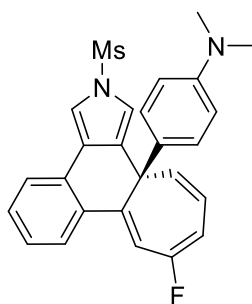

**2i**

Compound **2i** was prepared in 50% yield (22.3 mg) according to the general procedure. Pale yellow solid (mp 195–196 °C).  $[\alpha]_D^{25} = -135.7^\circ$  ( $c = 1.0$ ,  $CHCl_3$ ). 98% ee (determined by HPLC: Chiralpak IE Column, 20/80 *i*-PrOH/hexane, 1.0 mL/min, 254 nm; TR = 9.21 min (minor), 10.99 min (major)).  $^1H$  NMR (400 MHz,  $CDCl_3$ )  $\delta$  7.68 (d,  $J = 8.0$  Hz, 1H), 7.56 – 7.52 (m, 1H), 7.32 (d,  $J = 2.4$  Hz, 1H), 7.27 – 7.19 (m, 2H), 6.94 (d,  $J = 11.2$  Hz, 1H), 6.89 (d,  $J = 8.8$  Hz, 2H), 6.72 (d,  $J = 2.4$  Hz, 1H), 6.39 – 6.33 (m, 3H), 6.12 – 6.03 (m, 1H), 5.04 (d,  $J = 9.2$  Hz, 1H), 3.03 (s, 3H), 2.78 (s, 6H);  $^{13}C$  NMR (100 MHz,  $CDCl_3$ )  $\delta$  162.0 (d,  $J = 241.0$  Hz), 148.7, 133.5, 132.8, 130.8 (d,  $J = 2.0$  Hz), 128.7, 127.8, 127.6 (d,  $J = 11.0$  Hz), 127.4, 123.5, 123.3, 121.8, 121.6 (d,  $J = 13.0$  Hz), 118.8, 115.7, 113.1, 112.8, 112.4 (d,  $J = 8.0$  Hz), 112.1, 111.5, 45.0, 42.8, 40.6;  $^{19}F$  NMR (376 MHz,  $CDCl_3$ )  $\delta$  -101.0 – -101.2 (m); IR (neat): 2927, 2852, 1608, 1517, 1445, 1363, 1222, 1172, 1051, 985; HRESIMS Calcd for  $[C_{26}H_{23}FN_2NaO_2S]^+$  ( $M + Na^+$ ) 469.1356, found 469.1350.

**4-((3*bS*,3*cS*,7*aR*)-4-fluoro-2-(methylsulfonyl)-2*H*-benzo[*e*]benzo[1,3]cyclopropa[1,2-*g*]isoindol-3*b*(3*cH*)-yl)-*N,N*-dimethylaniline**  
**(2i')**

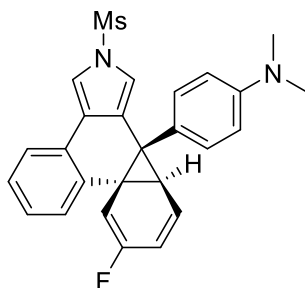

**2i'**

Compound **2i'** was prepared in 49% yield (21.9 mg) according to the general procedure. Pale yellow solid (mp 86–87 °C).  $[\alpha]_{\text{D}}^{25} = -45.3^\circ$  ( $c = 1.0$ ,  $\text{CHCl}_3$ ). 98% ee (determined by HPLC: Chiralpak IE Column, 20/80 *i*-PrOH/hexane, 1.0 mL/min, 254 nm; TR = 8.68 min (minor), 9.79 min (major)).  $^1\text{H}$  NMR (600 MHz,  $\text{CDCl}_3$ )  $\delta$  7.58 – 7.49 (m, 1H), 7.41 – 7.36 (m, 1H), 7.35 (d,  $J = 2.4$  Hz, 1H), 7.25 – 7.19 (m, 2H), 6.97 (d,  $J = 8.4$  Hz, 2H), 6.62 (d,  $J = 2.4$  Hz, 1H), 6.48 (d,  $J = 8.4$  Hz, 2H), 6.22 (d,  $J = 9.0$  Hz, 1H), 5.97 – 5.86 (m, 1H), 5.62 – 5.46 (m, 1H), 3.05 (s, 3H), 3.01 (d,  $J = 10.8$  Hz, 1H), 2.84 (s, 6H);  $^{13}\text{C}$  NMR (150 MHz,  $\text{CDCl}_3$ )  $\delta$  159.4 (d,  $J = 253.5$  Hz), 149.0, 135.0, 130.6, 130.2, 129.4, 127.6, 127.2, 126.0 (d,  $J = 9.0$  Hz), 125.9, 123.2, 121.4, 121.2 (d,  $J = 3.0$  Hz), 119.0, 113.6, 111.6, 105.9 (d,  $J = 24.0$  Hz), 67.9, 57.9, 42.8, 40.5, 28.6;  $^{19}\text{F}$  NMR (376 MHz,  $\text{CDCl}_3$ )  $\delta$  -107.4 (s); IR (neat): 2926, 1666, 1519, 1479, 1366, 1225, 1173, 1075, 983, 846; HRESIMS Calcd for  $[\text{C}_{26}\text{H}_{23}\text{FN}_2\text{NaO}_2\text{S}]^+$  ( $\text{M} + \text{Na}^+$ ) 469.1356, found 469.1358.

**(*S*)-10-bromo-2-(methylsulfonyl)-12a-(4-(pyrrolidin-1-yl)phenyl)-2,12a-dihydrobenzo[*e*]cyclohepta[*g*]isoindole (2j)**

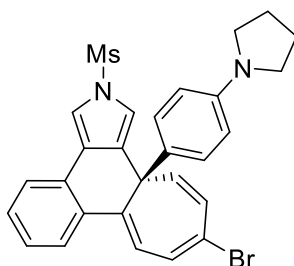

## 2j

Compound **2j** was prepared in 94% yield (50.1 mg) according to the general procedure. Pale yellow solid (mp 156–157 °C).  $[\alpha]_{\text{D}}^{25} = -247.4^{\circ}$  ( $c = 1.0$ ,  $\text{CHCl}_3$ ). 92% ee (determined by HPLC: Chiralpak IE Column, 30/70 *i*-PrOH/hexane, 1.0 mL/min, 254 nm; TR = 7.66 min (minor), 9.63 min (major)).  $^1\text{H}$  NMR (400 MHz,  $\text{CDCl}_3$ )  $\delta$  7.67 – 7.55 (m, 2H), 7.39 (d,  $J = 2.4$  Hz, 1H), 7.30 – 7.25 (m, 1H), 7.24 – 7.20 (m, 1H), 6.89 (d,  $J = 8.8$  Hz, 2H), 6.84 (d,  $J = 8.4$  Hz, 1H), 6.72 (d,  $J = 2.4$  Hz, 1H), 6.60 (dd,  $J = 8.0$ , 0.8 Hz, 1H), 6.54 (d,  $J = 8.8$  Hz, 1H), 6.28 (d,  $J = 8.8$  Hz, 2H), 4.71 (d,  $J = 9.2$  Hz, 1H), 3.22 – 3.13 (m, 4H), 3.08 (s, 3H), 1.99 – 1.85 (m, 4H);  $^{13}\text{C}$  NMR (100 MHz,  $\text{CDCl}_3$ )  $\delta$  146.1, 132.9, 132.1, 131.9, 130.0, 127.9, 127.8, 127.7, 127.6, 127.2, 127.0, 123.4, 122.0, 121.9, 121.7, 118.9, 113.1, 110.5, 109.8, 108.3, 47.5, 42.8, 42.5, 25.4; IR (neat): 3020, 2926, 1611, 1516, 1462, 1367, 1246, 1172, 1055, 984; HRESIMS Calcd for  $[\text{C}_{28}\text{H}_{25}\text{BrKN}_2\text{O}_2\text{S}]^+$  ( $\text{M} + \text{K}^+$ ) 571.0452, found 571.0437.

### (*S*)-*N,N*-dibenzyl-4-(10-bromo-2-(methylsulfonyl)benzo[*e*]cyclohepta[*g*]isoindol-12a(2*H*)-yl)aniline (2k)

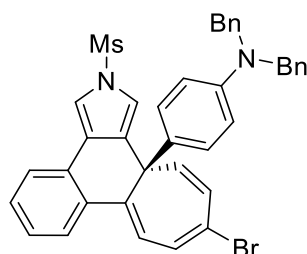

## 2k

Compound **2k** was prepared in 99% yield (65.3 mg) according to the general procedure. Pale yellow solid (mp 128–129 °C).  $[\alpha]_{\text{D}}^{25} = -200.4^{\circ}$  ( $c = 1.0$ ,  $\text{CHCl}_3$ ). 80% ee (determined by HPLC: Chiralpak IE Column, 30/70 *i*-PrOH/hexane, 1.0 mL/min, 254 nm; TR = 7.48 min (minor), 8.29 min (major)).  $^1\text{H}$  NMR (400 MHz,  $\text{CDCl}_3$ )  $\delta$  7.65 – 7.52 (m, 2H), 7.38 (d,  $J = 2.4$  Hz, 1H), 7.31 – 7.23 (m, 6H), 7.22 – 7.16 (m, 6H), 6.89 – 6.80 (m, 3H), 6.75 (d,  $J = 2.0$  Hz, 1H), 6.61 (dd,  $J = 8.4$ , 1.2 Hz, 1H), 6.53 – 6.38 (m, 3H), 4.74 (d,  $J = 9.2$  Hz, 1H), 4.51 (dd,  $J = 28$  Hz, 16.8 Hz, 4H), 3.09 (s, 3H);  $^{13}\text{C}$  NMR (100 MHz,  $\text{CDCl}_3$ )  $\delta$  147.6, 138.7, 132.5, 132.1, 131.9, 131.7, 128.4, 128.0, 127.8,

127.6, 127.2, 127.0, 126.8, 126.7, 123.4, 122.1, 121.8, 121.7, 119.0, 113.1, 111.8, 111.2, 109.8, 54.2, 42.7(3), 42.7(2); IR (neat): 3133, 2927, 1609, 1452, 1362, 1262, 1174, 1055, 983; HRESIMS Calcd for  $[C_{38}H_{31}BrN_2NaO_2S]^+$  ( $M + Na^+$ ) 681.1182, found 681.1175.

**(S)-10-bromo-12a-(4-methoxyphenyl)-2-(methylsulfonyl)-2,12a-dihydrobenzo[*e*]cyclohepta[*g*]isoindole (2l)**

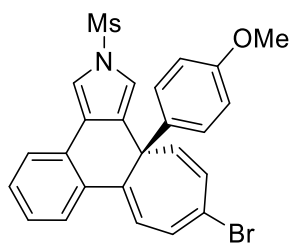

**2l**

Compound **2l** was prepared in 99% yield (48.9 mg) according to the general procedure except in DCM at 20 °C for 33 h. Pale yellow solid (mp 222–223 °C).  $[\alpha]_D^{25} = -248.3^\circ$  ( $c = 1.0$ ,  $CHCl_3$ ). 96% ee (determined by HPLC: Chiralpak IE Column, 30/70 *i*-PrOH/hexane, 1.0 mL/min, 254 nm; TR = 6.96 min (minor), 9.17 min (major)).  $^1H$  NMR (400 MHz,  $CDCl_3$ )  $\delta$  7.65 (d,  $J = 7.2$  Hz, 1H), 7.60 (dd,  $J = 7.6, 1.2$  Hz, 1H), 7.41 (d,  $J = 2.0$  Hz, 1H), 7.33 – 7.25 (m, 2H), 6.99 (d,  $J = 9.2$  Hz, 2H), 6.90 (d,  $J = 8.0$  Hz, 1H), 6.70 (d,  $J = 2.4$  Hz, 1H), 6.67 – 6.59 (m, 3H), 6.56 (d,  $J = 9.2$  Hz, 1H), 4.90 (d,  $J = 9.2$  Hz, 1H), 3.72 (s, 3H), 3.09 (s, 3H);  $^{13}C$  NMR (100 MHz,  $CDCl_3$ )  $\delta$  157.7, 135.8, 132.4, 132.3, 131.6, 128.2, 127.8, 127.7, 127.6, 127.5, 127.1, 123.5, 122.6, 121.7, 119.0, 114.1, 113.2, 112.7, 112.2, 55.1, 43.6, 42.8; IR (neat): 3023, 2928, 1606, 1507, 1464, 1366, 1247, 1171, 1077, 984; HRESIMS Calcd for  $[C_{25}H_{20}BrNNaO_3S]^+$  ( $M + Na^+$ ) 516.0239, found 516.0233.

**(S)-12a-(4-(benzyloxy)phenyl)-10-bromo-2-(methylsulfonyl)-2,12a-dihydrobenzo[*e*]cyclohepta[*g*]isoindole (2m)**

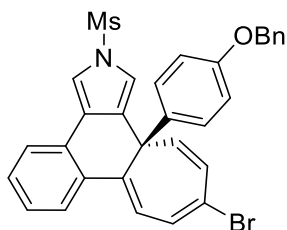

**2m**

Compound **2m** was prepared in 86% yield (49.1 mg) according to the general procedure except in DCM at 20 °C for 32 h. Pale yellow solid (mp 150–151 °C).  $[\alpha]_D^{25} = -211.5$  ( $c = 1.0$ ,  $\text{CHCl}_3$ ). 96% ee (determined by HPLC: Chiralpak IE Column, 30/70 *i*-PrOH/hexane, 1.0 mL/min, 254 nm; TR = 7.91 min (minor), 10.59 min (major)).  $^1\text{H}$  NMR (400 MHz,  $\text{CDCl}_3$ )  $\delta$  7.64 (d,  $J = 8.0$  Hz, 1H), 7.59 (d,  $J = 7.2$  Hz, 1H), 7.46 – 7.24 (m, 8H), 6.99 (d,  $J = 7.2$  Hz, 2H), 6.90 (d,  $J = 7.6$  Hz, 1H), 6.75 – 6.60 (m, 4H), 6.56 (d,  $J = 9.2$  Hz, 1H), 4.94 (s, 2H), 4.91 (s, 1H), 3.08 (s, 3H);  $^{13}\text{C}$  NMR (100 MHz,  $\text{CDCl}_3$ )  $\delta$  157.0, 137.0, 136.2, 132.3, 131.5, 128.5, 128.2, 127.9, 127.8, 127.7, 127.6, 127.5, 127.1, 123.5, 122.6, 121.6, 119.1, 114.8, 113.6, 113.2, 112.8, 69.9, 43.7, 42.8; IR (neat): 3023, 2928, 1606, 1507, 1463, 1366, 1247, 1172, 1055, 984; HRESIMS Calcd for  $[\text{C}_{31}\text{H}_{24}\text{BrNNaO}_3\text{S}]^+$  ( $\text{M} + \text{Na}^+$ ) 592.0552, found 592.0542.

**(S)-10-bromo-2-(methylsulfonyl)-12a-(*p*-tolyl)-2,12a-dihydrobenzo[*e*]cyclohepta[*g*]isoindole (2n)**

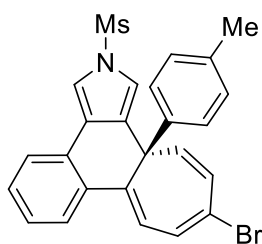

**2n**

Compound **2n** was prepared in 88% yield (42.1 mg) according to the general procedure except in DCM at 20 °C for 144 h. Pale yellow solid (mp 236–237 °C).  $[\alpha]_D^{25} = -253.6^\circ$  ( $c = 1.0$ ,  $\text{CHCl}_3$ ). 93% ee (determined by HPLC: Chiralpak IE Column, 20/80 *i*-PrOH/hexane, 1.0 mL/min, 254 nm; TR = 6.71 min (minor), 7.74 min (major)).  $^1\text{H}$  NMR (400 MHz,  $\text{CDCl}_3$ )  $\delta$  7.66 (d,  $J = 8.4$  Hz, 1H), 7.60 (dd,  $J = 8.0, 1.6$  Hz, 1H), 7.40 (d,  $J = 2.0$  Hz, 1H), 7.33 – 7.24 (m, 2H), 6.98 – 6.90 (m, 3H), 6.86 (d,  $J = 8.0$  Hz, 2H),

6.71 (d,  $J = 2.0$  Hz, 1H), 6.64 (dd,  $J = 8.0, 1.2$  Hz, 1H), 6.57 (d,  $J = 9.2$  Hz, 1H), 5.00 (d,  $J = 9.2$  Hz, 1H), 3.09 (s, 3H), 2.22 (s, 3H);  $^{13}\text{C}$  NMR (100 MHz,  $\text{CDCl}_3$ )  $\delta$  140.9, 135.6, 132.3, 131.4, 128.3, 128.0, 127.7, 127.6, 127.5, 127.2, 126.5, 123.5, 122.8, 121.7, 121.5, 119.1, 116.6, 114.5, 113.2, 44.5, 42.8, 20.9; IR (neat): 3021, 2926, 1647, 1525, 1472, 1362, 1262, 1172, 1054, 983; HRESIMS Calcd for  $[\text{C}_{25}\text{H}_{20}\text{BrNNaO}_2\text{S}]^+$  ( $\text{M} + \text{Na}^+$ ) 500.0290, found 500.0274.

**(S)-12a-([1,1'-biphenyl]-4-yl)-10-bromo-2-(methylsulfonyl)-2,12a-dihydrobenzo[*e*]cyclohepta[*g*]isoindole (2o)**

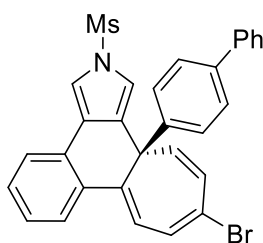

**2o**

Compound **2o** was prepared in 94% yield (50.8 mg) according to the general procedure except in DCM at 20 °C for 242 h. Pale yellow solid (mp 127–128 °C).  $[\alpha]_{\text{D}}^{25} = -162.6^\circ$  ( $c = 1.0$ ,  $\text{CHCl}_3$ ). 89% ee (determined by HPLC: Chiralpak IE Column, 20/80 *i*-PrOH/hexane, 1.0 mL/min, 254 nm; TR = 8.74 min (minor), 10.65 min (major)).  $^1\text{H}$  NMR (400 MHz,  $\text{CDCl}_3$ )  $\delta$  7.69 (d,  $J = 8.0$  Hz, 1H), 7.61 (dd,  $J = 7.6, 1.6$  Hz, 1H), 7.53 – 7.48 (m, 2H), 7.42 (d,  $J = 2.0$  Hz, 1H), 7.40 – 7.34 (m, 2H), 7.33 – 7.24 (m, 5H), 7.13 (d,  $J = 8.4$  Hz, 2H), 6.98 (d,  $J = 8.0$  Hz, 1H), 6.76 (d,  $J = 2.4$  Hz, 1H), 6.68 (dd,  $J = 7.6, 1.2$  Hz, 1H), 6.61 (d,  $J = 9.2$  Hz, 1H), 5.12 (d,  $J = 9.2$  Hz, 1H), 3.07 (s, 3H);  $^{13}\text{C}$  NMR (100 MHz,  $\text{CDCl}_3$ )  $\delta$  143.3, 140.5, 138.7, 132.6, 132.0, 131.2, 128.6, 128.4, 127.9, 127.8, 127.4, 127.2, 127.0, 126.9, 126.8, 125.9, 123.5, 123.1, 121.7, 121.4, 119.2, 118.9, 116.5, 113.3, 45.2, 42.8; IR (neat): 3027, 2926, 1600, 1485, 1404, 1338, 1264, 1173, 1055, 984; HRESIMS Calcd for  $[\text{C}_{30}\text{H}_{22}\text{BrNNaO}_2\text{S}]^+$  ( $\text{M} + \text{Na}^+$ ) 562.0447, found 562.0445.

**(S)-10-bromo-2-(methylsulfonyl)-12a-(4-(methylthio)phenyl)-2,12a-dihydrobenzo[*e*]cyclohepta[*g*]isoindole (2p)**

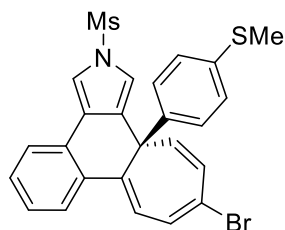

**2p**

Compound **2p** was prepared in 85% yield (43.4 mg) according to the general procedure except in DCM at 20 °C for 69 h. Pale yellow solid (mp 149–150 °C).  $[\alpha]_D^{25} = -184.9^\circ$  ( $c = 1.0$ ,  $\text{CHCl}_3$ ). 93% ee (determined by HPLC: Chiralpak IE Column, 20/80 *i*-PrOH/hexane, 1.0 mL/min, 254 nm; TR = 8.86 min (minor), 11.53 min (major)).  $^1\text{H}$  NMR (400 MHz,  $\text{CDCl}_3$ )  $\delta$  7.67 (d,  $J = 8.0$  Hz, 1H), 7.60 (d,  $J = 7.2$  Hz, 1H), 7.41 (d,  $J = 2.0$  Hz, 1H), 7.33 – 7.25 (m, 2H), 7.03 – 6.91 (m, 5H), 6.70 (d,  $J = 2.4$  Hz, 1H), 6.66 (d,  $J = 7.6$  Hz, 1H), 6.58 (d,  $J = 9.6$  Hz, 1H), 5.03 (d,  $J = 9.2$  Hz, 1H), 3.10 (s, 3H), 2.41 (s, 3H);  $^{13}\text{C}$  NMR (100 MHz,  $\text{CDCl}_3$ )  $\delta$  141.0, 135.7, 132.5, 132.0, 131.2, 128.4, 127.8, 127.5, 127.2, 127.1, 125.5, 123.5, 123.0, 121.6, 121.4, 119.1, 117.5, 115.2, 113.3, 44.7, 42.9, 15.6; IR (neat): 3020, 2925, 1592, 1524, 1438, 1367, 1262, 1173, 1055, 984; HRESIMS Calcd for  $[\text{C}_{25}\text{H}_{20}\text{BrNNaO}_2\text{S}_2]^+$  ( $\text{M} + \text{Na}^+$ ) 532.0011, found 532.0007.

**(S)-12a-(benzo[*d*][1,3]dioxol-5-yl)-10-bromo-2-(methylsulfonyl)-2,12a-dihydrobenzo[*e*]cyclohepta[*g*]isoindole (2q)**

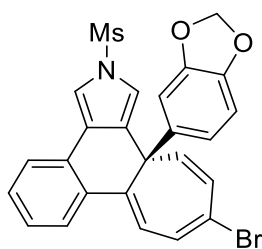

**2q**

Compound **2q** was prepared in 99% yield (50.3 mg) according to the general procedure except in DCM at 30 °C for 24 h. Pale yellow solid (mp 222–223 °C).  $[\alpha]_D^{25} = -232.2^\circ$  ( $c = 1.0$ ,  $\text{CHCl}_3$ ). 92% ee (determined by HPLC: Chiralpak IE Column, 30/70 *i*-PrOH/hexane, 1.0 mL/min, 254 nm; TR = 7.62 min (minor), 9.81 min (major)).  $^1\text{H}$  NMR (400 MHz,  $\text{CDCl}_3$ )  $\delta$  7.65 (d,  $J = 8.0$  Hz, 1H), 7.59 (dd,  $J = 7.6, 1.2$  Hz, 1H), 7.41 (d,  $J = 2.4$  Hz, 1H), 7.33 – 7.24 (m, 2H), 6.94 (d,  $J = 8.0$  Hz, 1H), 6.75 (d,  $J = 2.0$  Hz,



1H), 6.71 (dd,  $J = 8.0, 1.2$  Hz, 1H), 6.63 – 6.39 (m, 4H), 5.84 (dd,  $J = 3.6, 1.2$  Hz, 2H), 4.99 (d,  $J = 9.2$  Hz, 1H), 3.12 (s, 3H);  $^{13}\text{C}$  NMR (100 MHz,  $\text{CDCl}_3$ )  $\delta$  146.7, 145.7, 137.9, 132.4, 132.1, 131.2, 128.3, 127.7, 127.6, 127.5, 127.1, 123.5, 122.9, 121.6, 121.5, 119.6, 119.0, 116.6, 114.6, 113.3, 107.8, 106.9, 100.8, 45.6, 42.9; IR (neat): 3134, 2923, 1605, 1503, 1435, 1367, 1238, 1172, 1078, 984; HRESIMS Calcd for  $[\text{C}_{25}\text{H}_{18}\text{BrKNO}_4\text{S}]^+$  ( $\text{M} + \text{K}^+$ ) 545.9771, found 545.9749.

**(S)-10-bromo-12a-(3,4-dimethoxyphenyl)-2-(methylsulfonyl)-2,12a-dihydrobenzo[*e*]cyclohepta[*g*]isoindole (2r)**

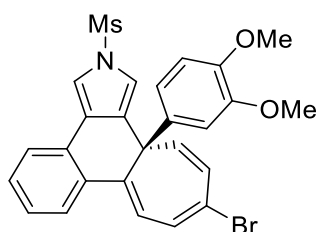

**2r**

Compound **2r** was prepared in 99% yield (51.9 mg) according to the general procedure except at in DCM at 20 °C for 50 h. Pale yellow solid (mp 134–135 °C).  $[\alpha]_{\text{D}}^{25} = -168.5^\circ$  ( $c = 1.0, \text{CHCl}_3$ ). 81% ee (determined by HPLC: Chiralpak IE Column, 50/50 *i*-PrOH/hexane, 1.0 mL/min, 254 nm; TR = 7.21 min (minor), 9.75 min (major)).  $^1\text{H}$  NMR (400 MHz,  $\text{CDCl}_3$ )  $\delta$  7.66 (d,  $J = 8.0$  Hz, 1H), 7.61 (d,  $J = 7.2$  Hz, 1H), 7.42 (s, 1H), 7.34 – 7.25 (m, 2H), 6.92 (d,  $J = 8.0$  Hz, 1H), 6.72 (s, 1H), 6.67 (d,  $J = 8.8$  Hz, 1H), 6.64 – 6.47 (m, 4H), 4.98 (d,  $J = 9.2$  Hz, 1H), 3.79 (s, 3H), 3.77 (s, 3H), 3.11 (s, 3H);  $^{13}\text{C}$  NMR (100 MHz,  $\text{CDCl}_3$ )  $\delta$  147.6, 147.1, 136.4, 132.4, 132.2, 131.3, 128.3, 127.7, 127.6, 127.1, 123.5, 122.8, 121.6, 121.4, 119.4, 118.9, 116.3, 114.1, 113.2, 110.4, 110.1, 55.9, 55.6, 44.4, 42.8; IR (neat): 3038, 2928, 1591, 1512, 1464, 1366, 1260, 1173, 1056, 985; HRESIMS Calcd for  $[\text{C}_{26}\text{H}_{22}\text{BrNNaO}_4\text{S}]^+$  ( $\text{M} + \text{Na}^+$ ) 546.0345, found 546.0322.

**(S)-10-bromo-2-(methylsulfonyl)-12a-(thiophen-2-yl)-2,12a-dihydrobenzo[*e*]cyclohepta[*g*]isoindole (2s)**

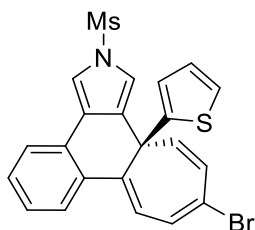

**2s**

Compound **2s** was prepared in 95% yield (44.7 mg) according to the general procedure except in DCM at 30 °C for 11 h. Pale yellow solid (mp 198–199 °C).  $[\alpha]_{\text{D}}^{25} = -216.5^\circ$  ( $c = 1.0$ ,  $\text{CHCl}_3$ ). 95% ee (determined by HPLC: Chiralpak IE Column, 20/80 *i*-PrOH/hexane, 1.0 mL/min, 254 nm; TR = 7.98 min (minor), 9.46 min (major)).  $^1\text{H}$  NMR (400 MHz,  $\text{CDCl}_3$ )  $\delta$  7.66 (d,  $J = 8.0$  Hz, 1H), 7.59 (d,  $J = 7.2$  Hz, 1H), 7.43 (d,  $J = 2.0$  Hz, 1H), 7.34 – 7.23 (m, 2H), 6.98 (d,  $J = 8.0$  Hz, 1H), 6.95 – 6.88 (m, 2H), 6.85 (d,  $J = 8.0$  Hz, 1H), 6.74 – 6.66 (m, 1H), 6.66 – 6.59 (m, 1H), 6.53 (d,  $J = 9.2$  Hz, 1H), 5.21 (d,  $J = 9.2$  Hz, 1H), 3.12 (s, 3H);  $^{13}\text{C}$  NMR (100 MHz,  $\text{CDCl}_3$ )  $\delta$  148.9, 132.8, 131.6, 130.5, 128.4, 128.2, 127.8, 127.3, 127.0, 125.2, 125.0, 123.5(4), 123.5(0), 122.6, 121.8, 121.5, 120.3, 119.2, 118.8, 113.4, 42.9, 42.3; IR (neat): 3132, 2927, 1592, 1525, 1431, 1367, 1262, 1174, 1055, 985; HRESIMS Calcd for  $[\text{C}_{22}\text{H}_{16}\text{BrNNaO}_2\text{S}_2]^+$  ( $\text{M} + \text{Na}^+$ ) 491.9698, found 491.9683.

**(S)-4-(10-bromo-6-fluoro-2-(methylsulfonyl)benzo[e]cyclohepta[g]isoindol-12a(2H)-yl)-N,N-dimethylaniline (2t)**

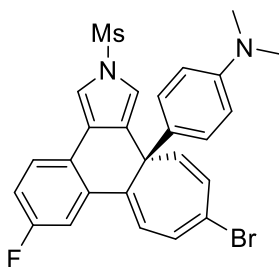

**2t**

Compound **2t** was prepared in 98% yield (51.5 mg) according to the general procedure. Pale yellow solid (mp 217–218 °C).  $[\alpha]_{\text{D}}^{25} = -212.5^\circ$  ( $c = 1.0$ ,  $\text{CHCl}_3$ ). 94% ee (determined by HPLC: Chiralpak IE Column, 20/80 *i*-PrOH/hexane, 1.0 mL/min, 254 nm; TR = 9.07 min (minor), 11.10 min (major)).  $^1\text{H}$  NMR (400 MHz,  $\text{CDCl}_3$ )  $\delta$  7.55

(dd,  $J = 8.8, 6.0$  Hz, 1H), 7.34 (d,  $J = 2.4$  Hz, 1H), 7.30 (dd,  $J = 11.2, 2.8$  Hz, 1H), 7.04 – 6.95 (m, 1H), 6.89 (d,  $J = 8.8$  Hz, 2H), 6.76 (d,  $J = 8.4$  Hz, 1H), 6.71 (d,  $J = 2.0$  Hz, 1H), 6.60 (dd,  $J = 8.4, 1.2$  Hz, 1H), 6.55 (d,  $J = 9.2$  Hz, 1H), 6.45 (d,  $J = 8.8$  Hz, 2H), 4.72 (d,  $J = 8.8$  Hz, 1H), 3.10 (s, 3H), 2.86 (s, 6H);  $^{13}\text{C}$  NMR (100 MHz,  $\text{CDCl}_3$ )  $\delta$  162.2 (d,  $J = 244.0$  Hz), 148.8, 134.3 (d,  $J = 7.0$  Hz), 132.3, 131.8, 130.8, 127.7, 127.4, 125.1 (d,  $J = 8.0$  Hz), 123.3 (d,  $J = 3.0$  Hz), 122.6, 122.4, 121.0, 119.0, 115.5 (d,  $J = 23.0$  Hz), 113.8 (d,  $J = 23.0$  Hz), 112.7 (d,  $J = 1.0$  Hz), 111.5, 108.8 (d,  $J = 3.0$  Hz), 108.5, 42.8, 42.2, 40.5;  $^{19}\text{F}$  NMR (376 MHz,  $\text{CDCl}_3$ )  $\delta$  -113.5 – -113.8 (m); IR (neat): 3133, 2924, 1614, 1516, 1475, 1362, 1262, 1171, 1075, 985; HRESIMS Calcd for  $[\text{C}_{26}\text{H}_{22}\text{BrFN}_2\text{NaO}_2\text{S}]^+$  ( $\text{M} + \text{Na}^+$ ) 547.0462, found 547.0461.

**(*S*)-4-(10-bromo-6-chloro-2-(methylsulfonyl)benzo[*e*]cyclohepta[*g*]isoindol-12a(2*H*)-yl)-*N,N*-dimethylaniline (**2u**)**

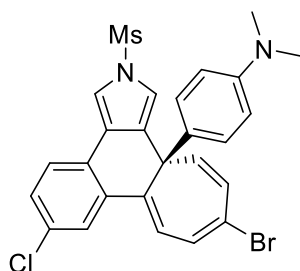

**2u**

Compound **2u** was prepared in 91% yield (49.3 mg) according to the general procedure. Pale yellow solid (mp 143–144 °C).  $[\alpha]_{\text{D}}^{25} = -172.5^\circ$  ( $c = 1.0, \text{CHCl}_3$ ). 90% ee (determined by HPLC: Chiralpak IE Column, 20/80 *i*-PrOH/hexane, 1.0 mL/min, 254 nm; TR = 9.60 min (minor), 12.08 min (major)).  $^1\text{H}$  NMR (400 MHz,  $\text{CDCl}_3$ )  $\delta$  7.58 (d,  $J = 2.0$  Hz, 1H), 7.51 (d,  $J = 8.4$  Hz, 1H), 7.37 (d,  $J = 2.0$  Hz, 1H), 7.25 – 7.22 (m, 1H), 6.89 (d,  $J = 8.8$  Hz, 2H), 6.76 (d,  $J = 8.4$  Hz, 1H), 6.71 (d,  $J = 2.4$  Hz, 1H), 6.58 (dd,  $J = 8.4, 1.2$  Hz, 1H), 6.54 (d,  $J = 8.9$  Hz, 1H), 6.46 (d,  $J = 8.8$  Hz, 2H), 4.61 (d,  $J = 8.8$  Hz, 1H), 3.10 (s, 3H), 2.87 (s, 6H);  $^{13}\text{C}$  NMR (100 MHz,  $\text{CDCl}_3$ )  $\delta$  148.8, 134.0, 133.2, 132.3, 131.8, 128.0, 127.9, 127.7, 127.2, 125.5, 124.7, 122.6, 122.4, 120.8, 119.1, 113.3, 111.6, 105.8, 42.9, 41.7, 40.5; IR (neat): 3135, 2925, 1611, 1517, 1464, 1367,

1262, 1126, 1045, 949; HRESIMS Calcd for  $[C_{26}H_{22}BrClN_2NaO_2S]^+$  ( $M + Na^+$ ) 563.0166, found 563.0148.

**(S)-4-(10-bromo-6-methoxy-2-(methylsulfonyl)benzo[e]cyclohepta[g]isoindol-12a(2H)-yl)-N,N-dimethylaniline (2v)**

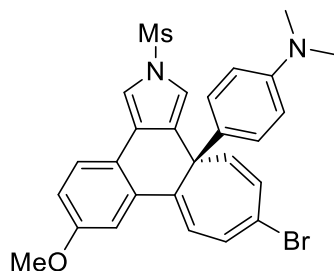

**2v**

Compound **2v** was prepared in 97% yield (52.1 mg) according to the general procedure. Pale yellow solid (mp 153–154 °C).  $[\alpha]_D^{25} = -219.9^\circ$  ( $c = 1.0$ ,  $CHCl_3$ ). 90% ee (determined by HPLC: Chiralpak IE Column, 20/80 *i*-PrOH/hexane, 1.0 mL/min, 254 nm; TR = 14.01 min (minor), 21.20 min (major)).  $^1H$  NMR (400 MHz,  $CDCl_3$ )  $\delta$  7.52 (d,  $J = 8.4$  Hz, 1H), 7.30 (d,  $J = 2.0$  Hz, 1H), 7.11 (d,  $J = 2.4$  Hz, 1H), 6.93 – 6.85 (m, 3H), 6.80 (d,  $J = 8.0$  Hz, 1H), 6.69 (d,  $J = 2.0$  Hz, 1H), 6.58 (dd,  $J = 8.0, 1.2$  Hz, 1H), 6.54 (d,  $J = 8.9$  Hz, 1H), 6.46 (d,  $J = 8.9$  Hz, 2H), 4.66 (d,  $J = 8.9$  Hz, 1H), 3.85 (s, 3H), 3.08 (s, 3H), 2.86 (s, 6H);  $^{13}C$  NMR (100 MHz,  $CDCl_3$ )  $\delta$  159.1, 148.7, 133.6, 132.4, 131.8, 131.1, 127.9, 127.2, 124.8, 122.2, 122.0, 121.7, 120.3, 118.9, 115.0, 112.0(4), 111.9(8), 111.5, 108.0, 106.9, 55.4, 42.7, 42.1, 40.5; IR (neat): 3133, 2925, 1612, 1517, 1479, 1366, 1260, 1170, 1075, 984; HRESIMS Calcd for  $[C_{27}H_{25}BrN_2NaO_3S]^+$  ( $M + Na^+$ ) 559.0661, found 559.0649.

**(S)-4-(10-bromo-5-chloro-2-(methylsulfonyl)benzo[e]cyclohepta[g]isoindol-12a(2H)-yl)-N,N-dimethylaniline (2w)**

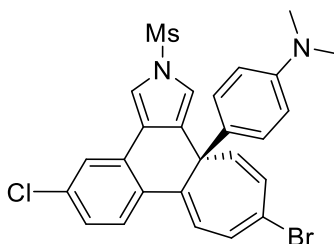

## 2w

Compound **2w** was prepared in 99% yield (53.6 mg) according to the general procedure. Pale yellow solid (mp 160–161 °C).  $[\alpha]_D^{25} = -200.6^\circ$  (c = 1.0, CHCl<sub>3</sub>). 94% ee (determined by HPLC: Chiralpak IE Column, 20/80 *i*-PrOH/hexane, 1.0 mL/min, 254 nm; TR = 8.78 min (minor), 11.5 min (major)). <sup>1</sup>H NMR (400 MHz, CDCl<sub>3</sub>) δ 7.61 – 7.49 (m, 2H), 7.39 (d, *J* = 2.0 Hz, 1H), 7.19 (dd, *J* = 8.8, 2.4 Hz, 1H), 6.88 (d, *J* = 8.8 Hz, 2H), 6.81 (d, *J* = 8.0 Hz, 1H), 6.73 (d, *J* = 2.4 Hz, 1H), 6.61 (dd, *J* = 8.0, 1.2 Hz, 1H), 6.55 (d, *J* = 8.8 Hz, 1H), 6.45 (d, *J* = 8.8 Hz, 2H), 4.80 (d, *J* = 9.2 Hz, 1H), 3.11 (s, 3H), 2.86 (s, 6H); <sup>13</sup>C NMR (125 MHz, CDCl<sub>3</sub>) δ 148.8, 134.0, 132.7, 132.0, 131.2, 130.4, 129.1, 128.7, 127.6, 127.5, 123.2, 122.6, 121.8, 120.7, 119.1, 113.6, 111.5, 110.7, 42.9, 40.5; IR (neat): 3137, 2926, 1611, 1516, 1472, 1367, 1262, 1172, 1020, 984; HRESIMS Calcd for [C<sub>26</sub>H<sub>22</sub>BrClN<sub>2</sub>NaO<sub>2</sub>S]<sup>+</sup> (M + Na<sup>+</sup>) 563.0166, found 563.0150.

## (*S*)-4-(10-bromo-5-methyl-2-(methylsulfonyl)benzo[*e*]cyclohepta[*g*]isoindol-12a(2*H*)-yl)-*N,N*-dimethylaniline (**2x**)

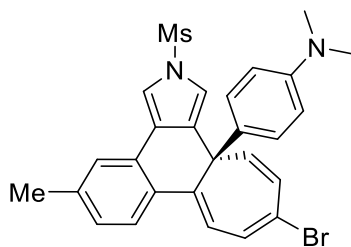

**2x**

Compound **2x** was prepared in 99% yield (51.6 mg) according to the general procedure. Pale yellow solid (mp 156–157 °C).  $[\alpha]_D^{25} = -162.3^\circ$  (c = 1.0, CHCl<sub>3</sub>). 95% ee (determined by HPLC: Chiralpak IE Column, 20/80 *i*-PrOH/hexane, 1.0 mL/min, 254 nm; TR = 8.67 min (minor), 11.41 min (major)). <sup>1</sup>H NMR (400 MHz, CDCl<sub>3</sub>) δ 7.56 (d, *J* = 8.4 Hz, 1H), 7.40 (d, *J* = 11.6 Hz, 2H), 7.25 (d, *J* = 1.6 Hz, 1H), 7.06 (d, *J* = 8.0 Hz, 1H), 6.94 – 6.82 (m, 2H), 6.75 – 6.68 (m, 1H), 6.64 (d, *J* = 8.0 Hz, 1H), 6.54 (d, *J* = 9.6 Hz, 1H), 6.44 (d, *J* = 7.6 Hz, 2H), 4.96 (d, *J* = 9.2 Hz, 1H), 3.09 (s, 3H), 2.85 (s, 6H), 2.37 (s, 3H); <sup>13</sup>C NMR (100 MHz, CDCl<sub>3</sub>) δ 148.7, 138.1, 133.3, 132.3, 132.0, 129.1, 128.8, 127.6, 127.5, 127.3, 127.1, 123.9, 122.2, 121.8, 120.7, 118.9, 117.2, 114.8, 113.0, 111.5, 44.1, 42.8, 40.5, 21.1; IR (neat): 3133, 2921, 1614, 1517, 1445, 1367,

1262, 1172, 1050, 983; HRESIMS Calcd for  $[C_{27}H_{25}BrKN_2O_2S]^+$  ( $M + K^+$ ) 559.0452, found 559.0444.

**(S)-4-(10-bromo-5-methoxy-2-(methylsulfonyl)benzo[e]cyclohepta[g]isoindol-12a(2H)-yl)-N,N-dimethylaniline (2y)**

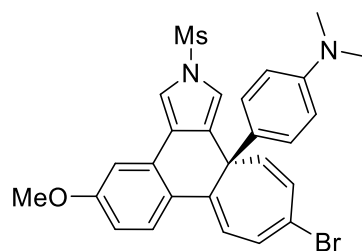

**2y**

Compound **2y** was prepared in 98% yield (52.7mg) according to the general procedure. Pale yellow solid (mp 148–149 °C).  $[\alpha]_D^{25} = -101.4^\circ$  ( $c = 1.0$ ,  $CHCl_3$ ). 94% ee (determined by HPLC: Chiralpak IE Column, 40/60 *i*-PrOH/hexane, 1.0 mL/min, 254 nm; TR = 7.93 min (minor), 10.65 min (major)).  $^1H$  NMR (400 MHz,  $CDCl_3$ )  $\delta$  7.63 (d,  $J = 9.2$  Hz, 1H), 7.38 (d,  $J = 2.4$  Hz, 1H), 7.06 (d,  $J = 2.8$  Hz, 1H), 6.90 (d,  $J = 8.8$  Hz, 2H), 6.85 – 6.78 (m, 2H), 6.74 (d,  $J = 2.0$  Hz, 1H), 6.68 (dd,  $J = 8.0, 1.2$  Hz, 1H), 6.55 (dd,  $J = 9.6, 0.4$  Hz, 1H), 6.43 (d,  $J = 8.8$  Hz, 2H), 5.12 (d,  $J = 9.6$  Hz, 1H), 3.87 (s, 3H), 3.10 (s, 3H), 2.85 (s, 6H);  $^{13}C$  NMR (100 MHz,  $CDCl_3$ )  $\delta$  159.6, 148.6, 133.6, 132.5(4), 132.4(9), 129.1, 128.7, 127.8, 127.0, 124.6, 122.1, 122.0, 121.8, 119.4, 118.9, 118.8, 114.9, 113.1, 111.5, 107.0, 55.4, 45.2, 42.7, 40.5; IR (neat): 3130, 2921, 1609, 1516, 1491, 1364, 1230, 1172, 1075, 985; HRESIMS Calcd for  $[C_{27}H_{25}BrKN_2O_3S]^+$  ( $M + K^+$ ) 575.0401, found 575.0389.

**(S)-12a-(4-methoxyphenyl)-2-(methylsulfonyl)-2,12a-dihydrobenzo[e]cyclohepta[g]isoindole (2z)**

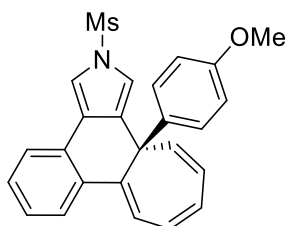

## 2z

Compound **2z** was prepared in 98% yield (40.7 mg) according to the general procedure except in DCM at 30 °C for 10 h. Pale yellow solid (mp 144–145 °C).  $[\alpha]_D^{25} = -201.9^\circ$  (c = 1.0, CHCl<sub>3</sub>). 91% ee (determined by HPLC: Chiralpak IE Column, 20/80 *i*-PrOH/hexane, 1.0 mL/min, 254 nm; TR = 8.50 min (minor), 11.28 min (major)). <sup>1</sup>H NMR (400 MHz, CDCl<sub>3</sub>) δ 7.69 – 7.54 (m, 2H), 7.40 (d, *J* = 2.0 Hz, 1H), 7.31 – 7.24 (m, 2H), 7.05 – 6.92 (m, 3H), 6.71 (d, *J* = 2.0 Hz, 1H), 6.58 (d, *J* = 8.8 Hz, 2H), 6.46 – 6.38 (m, 1H), 6.37 – 6.23 (m, 2H), 4.70 (d, *J* = 8.8 Hz, 1H), 3.70 (s, 3H), 3.08 (s, 3H); <sup>13</sup>C NMR (100 MHz, CDCl<sub>3</sub>) δ 157.4, 135.7, 133.0, 132.8, 128.9, 128.8, 128.0, 127.8, 127.6, 126.7, 124.9, 123.3, 122.1, 121.9, 118.9, 113.2, 112.3, 105.2, 104.1, 55.0, 42.7, 41.3; IR (neat): 3022, 2927, 1606, 1507, 1441, 1366, 1245, 1172, 1077, 949; HRESIMS Calcd for [C<sub>25</sub>H<sub>21</sub>KNO<sub>3</sub>S]<sup>+</sup> (M + K<sup>+</sup>) 454.0874, found 454.0885.

### (*S*)-12a-(4-methoxyphenyl)-10-methyl-2-(methylsulfonyl)-2,12a-dihydrobenzo[*e*]cyclohepta[*g*]isoindole (**2aa**)

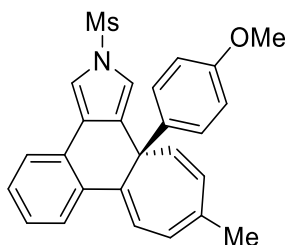

## 2aa

Compound **2aa** was prepared in 99% yield (42.5 mg) according to the general procedure except in DCM at 30 °C for 8 h. Pale white solid (mp 100–101 °C).  $[\alpha]_D^{25} = -176.1^\circ$  (c = 1.0, CHCl<sub>3</sub>). 83% ee (determined by HPLC: Chiralpak IE Column, 20/80 *i*-PrOH/hexane, 1.0 mL/min, 254 nm; TR = 8.21 min (minor), 12.92 min (major)). <sup>1</sup>H NMR (400 MHz, CDCl<sub>3</sub>) δ 7.66 – 7.60 (m, 1H), 7.60 – 7.53 (m, 1H), 7.38 (d, *J* = 2.4 Hz, 1H), 7.25 – 7.19 (m, 2H), 7.01 (d, *J* = 8.8 Hz, 2H), 6.85 (d, *J* = 7.6 Hz, 1H), 6.67 (d, *J* = 2.4 Hz, 1H), 6.58 (d, *J* = 8.8 Hz, 2H), 6.16 (d, *J* = 8.8 Hz, 1H), 6.08 (d, *J* = 8.0 Hz, 1H), 4.57 (d, *J* = 8.8 Hz, 1H), 3.71 (s, 3H), 3.08 (s, 3H), 1.84 (s, 3H); <sup>13</sup>C NMR (100 MHz, CDCl<sub>3</sub>) δ 157.4, 136.9, 136.3, 133.2, 133.1, 128.6, 128.4, 127.5, 127.2,

126.5, 125.3, 123.3, 122.4, 122.1, 118.8, 113.1, 112.3, 101.7, 55.0, 42.7, 40.7, 22.6; IR (neat): 3018, 2923, 1606, 1507, 1464, 1366, 1246, 1172, 1077, 984; HRESIMS Calcd for  $[C_{26}H_{23}NNaO_3S]^+$  ( $M + Na^+$ ) 452.1291, found 452.1287.

**(S)-4-(10-bromo-2-(methylsulfonyl)-4,5,6,7-tetrahydrobenzo[*e*]cyclohepta[*g*]isoindol-12a(2*H*)-yl)-*N,N*-dimethylaniline (2ab)**

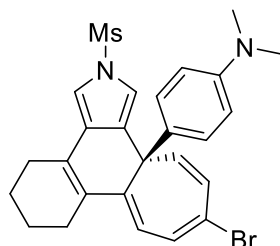

**2ab**

Compound **2ab** was prepared in 85% yield (43.5 mg) according to the general procedure. Pale yellow solid (mp 138–139 °C).  $[\alpha]_D^{25} = -482.8^\circ$  ( $c = 1.0$ ,  $CHCl_3$ ). 96% ee (determined by HPLC: Chiralpak IE Column, 20/80 *i*-PrOH/hexane, 1.0 mL/min, 254 nm; TR = 8.16 min (minor), 9.21 min (major)).  $^1H$  NMR (400 MHz,  $CDCl_3$ )  $\delta$  6.94 (d,  $J = 2.0$  Hz, 1H), 6.91 (d,  $J = 9.2$  Hz, 2H), 6.71 (d,  $J = 2.4$  Hz, 1H), 6.68 (dd,  $J = 7.6$ , 1.2 Hz, 1H), 6.51 (dd,  $J = 10.0$ , 0.8 Hz, 1H), 6.44 (d,  $J = 8.8$  Hz, 2H), 6.35 (d,  $J = 8.0$  Hz, 1H), 5.49 (d,  $J = 10.4$  Hz, 1H), 3.05 (s, 3H), 2.85 (s, 6H), 2.63 – 2.54 (m, 1H), 2.54 – 2.39 (m, 2H), 2.37 – 2.23 (m, 1H), 1.91 – 1.82 (m, 1H), 1.83 – 1.71 (m, 3H);  $^{13}C$  NMR (100 MHz,  $CDCl_3$ )  $\delta$  148.7, 137.6, 134.1, 133.5, 133.1, 128.6, 128.3, 128.2, 127.7, 126.3, 124.6, 121.8, 119.6, 118.1, 112.6, 111.5, 47.6, 42.6, 40.6, 27.1, 26.6, 23.2, 21.7. IR (neat): 3133, 2924, 1608, 1516, 1447, 1366, 1261, 1169, 1066, 983; HRESIMS Calcd for  $[C_{26}H_{27}BrN_2NaO_2S]^+$  ( $M + Na^+$ ) 533.0869, found 533.0861.

**(S)-10-bromo-2-(methylsulfonyl)-12a-phenyl-2,12a-dihydrobenzo[*e*]cyclohepta[*g*]isoindole (2ac)**



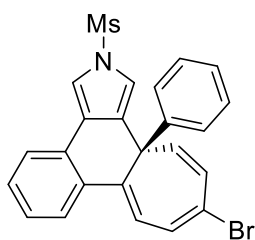

**2ac**

Compound **2ac** was prepared in 79% yield (36.7 mg) according to the general procedure except in DCM at 50 °C for 40 h. Pale yellow solid (mp 152–153 °C).  $[\alpha]_D^{25} = -3.2^\circ$  ( $c = 1.0$ ,  $\text{CHCl}_3$ ). 2% ee (determined by HPLC: Chiralpak IE Column, 30/70 *i*-PrOH/hexane, 1.0 mL/min, 254 nm; TR = 5.97 min (minor), 6.81 min (major)).  $^1\text{H}$  NMR (400 MHz,  $\text{CDCl}_3$ )  $\delta$  7.68 (d,  $J = 8.0$  Hz, 1H), 7.60 (dd,  $J = 7.6, 1.2$  Hz, 1H), 7.41 (d,  $J = 2.4$  Hz, 1H), 7.33 – 7.25 (m, 2H), 7.15 – 7.04 (m, 5H), 6.95 (d,  $J = 8.0$  Hz, 1H), 6.71 (d,  $J = 2.4$  Hz, 1H), 6.64 (dd,  $J = 8.0, 0.8$  Hz, 1H), 6.58 (d,  $J = 9.6$  Hz, 1H), 5.06 (d,  $J = 9.2$  Hz, 1H), 3.08 (s, 3H);  $^{13}\text{C}$  NMR (100 MHz,  $\text{CDCl}_3$ )  $\delta$  144.1, 132.4, 132.1, 131.3, 128.3, 127.8, 127.7, 127.4, 127.3, 127.2, 126.6, 126.2, 123.5, 123.0, 121.7, 121.5, 119.2, 117.7, 115.5, 113.3, 45.1, 42.8; IR (neat): 3022, 2925, 1596, 1527, 1446, 1366, 1261, 1173, 1054, 984; HRESIMS Calcd for  $[\text{C}_{24}\text{H}_{18}\text{BrKNO}_2\text{S}]^+$  ( $\text{M} + \text{K}^+$ ) 501.9873, found 501.9850.

**(S)-10-bromo-12a-(4-chlorophenyl)-2-(methylsulfonyl)-2,12a-dihydrobenzo[*e*]cyclohepta[*g*]isoindole (2ad)**

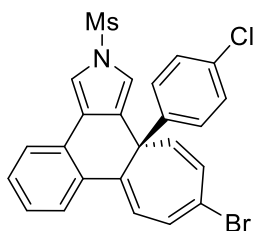

**2ad**

Compound **2ad** was prepared in 93% yield (46.4 mg) according to the general procedure except in DCM at 50 °C for 40 h. Pale yellow solid (mp 146–147 °C).  $[\alpha]_D^{25} = -29.3^\circ$  ( $c = 1.0$ ,  $\text{CHCl}_3$ ). 7% ee (determined by HPLC: Chiralpak IE Column, 30/70 *i*-PrOH/hexane, 1.0 mL/min, 254 nm; TR = 5.97 min (minor), 7.03 min (major)).  $^1\text{H}$  NMR (400 MHz,  $\text{CDCl}_3$ )  $\delta$  7.71 – 7.64 (m, 1H), 7.60 (dd,  $J = 7.6, 1.2$  Hz, 1H), 7.42 (d,

$J = 2.4$  Hz, 1H), 7.35 – 7.26 (m, 2H), 7.06 – 7.00 (m, 4H), 6.97 (d,  $J = 8.0$  Hz, 1H), 6.72 – 6.64 (m, 2H), 6.59 (d,  $J = 9.6$  Hz, 1H), 5.10 (d,  $J = 9.2$  Hz, 1H), 3.11 (s, 3H);  $^{13}\text{C}$  NMR (100 MHz,  $\text{CDCl}_3$ )  $\delta$  142.9, 132.8, 131.8, 131.7, 131.0, 128.6, 128.0, 127.9, 127.6, 127.5, 127.2, 123.6, 123.3, 121.6, 121.4, 119.4, 119.2, 116.8, 113.5, 45.2, 43.0; IR (neat): 2960, 2927, 1603, 1524, 1487, 1367, 1264, 1173, 1015, 949; HRESIMS Calcd for  $[\text{C}_{24}\text{H}_{17}\text{BrClKNO}_2\text{S}]^+$  ( $\text{M} + \text{K}^+$ ) 535.9483, found 535.9483

***N*-(7-bromophenanthren-9-yl)-*N*-(3-cyclohexylprop-2-yn-1-yl)methanesulfonamide (2ae')**

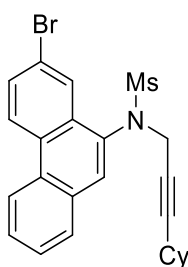

**2ae'**

Compound **2ae'** was prepared in 69% yield (32.6 mg) according to the general procedure in DCM at 50 °C for 9 d. Pale yellow solid (mp 191–192 °C).  $^1\text{H}$  NMR (500 MHz,  $\text{CDCl}_3$ )  $\delta$  8.62 (d,  $J = 8.0$  Hz, 1H), 8.55 (d,  $J = 9.0$  Hz, 1H), 8.43 (d,  $J = 2.0$  Hz, 1H), 8.08 (s, 1H), 7.89 – 7.85 (m, 1H), 7.78 (dd,  $J = 8.5, 2.0$  Hz, 1H), 7.75 – 7.70 (m, 1H), 7.68 – 7.61 (m, 1H), 4.84 (dd,  $J = 18.0, 2.0$  Hz, 1H), 4.19 (dd,  $J = 18.0, 2.0$  Hz, 1H), 3.27 (s, 3H), 2.50 – 2.34 (m, 1H), 1.84 – 1.74 (m, 2H), 1.73 – 1.63 (m, 2H), 1.56 – 1.47 (m, 1H), 1.47 – 1.36 (m, 2H), 1.35 – 1.23 (m, 3H);  $^{13}\text{C}$  NMR (100 MHz,  $\text{CDCl}_3$ )  $\delta$  133.9, 132.2, 130.9, 130.7, 130.3, 130.2, 129.0, 128.8, 128.2, 127.4, 126.8, 124.7, 122.6, 122.0, 91.2, 74.6, 42.0, 39.7, 32.4, 29.0, 25.7, 24.7; IR (neat): 2929, 2853, 1593, 1483, 1346, 1265, 1155, 1071, 952, 775; HRESIMS Calcd for  $[\text{C}_{24}\text{H}_{24}\text{BrKNO}_2\text{S}]^+$  ( $\text{M} + \text{K}^+$ ) 508.0343, found 508.0342.

***(S)*-4-(6-bromo-10-(methanesulfonyl)cyclohepta[*e*]furo[3,2-*g*]isoindol-8a(10*H*)-yl)-*N,N*-dimethylaniline (2af)**

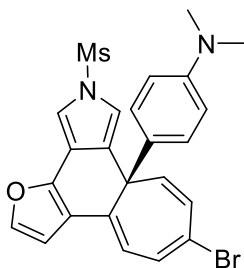

**2af**

Compound **2af** was prepared in 70% yield (35.9 mg) according to the general procedure except in THF (12 h). Pale yellow solid (mp 221–222 °C).  $[\alpha]_D^{25} = 130.3^\circ$  ( $c = 1.0$ ,  $\text{CHCl}_3$ ). 40% ee (determined by HPLC: Chiralpak IE Column, 20/80 *i*-PrOH/hexane, 1.0 mL/min, 254 nm; TR = 10.60 min (major), 13.63 min (minor)).  $^1\text{H NMR}$  (400 MHz,  $\text{CDCl}_3$ )  $\delta$  7.38 (d,  $J = 2.0$  Hz, 1H), 7.16 (d,  $J = 2.4$  Hz, 1H), 6.96 (d,  $J = 8.8$  Hz, 2H), 6.80 (d,  $J = 2.0$  Hz, 1H), 6.69 (d,  $J = 7.6$  Hz, 1H), 6.63 (d,  $J = 2.0$  Hz, 1H), 6.55 (d,  $J = 10.4$  Hz, 1H), 6.49 – 6.41 (m, 3H), 5.53 (d,  $J = 10.4$  Hz, 1H), 3.08 (s, 3H), 2.85 (s, 6H);  $^{13}\text{C NMR}$  (100 MHz,  $\text{CDCl}_3$ )  $\delta$  148.9, 145.8, 142.9, 136.1, 132.5, 132.3, 131.8, 129.0, 127.6, 126.4, 122.1, 120.6, 119.2, 118.5, 115.1, 111.6, 110.2, 107.8, 48.6, 42.7, 40.5; IR (neat): 2923, 2853, 1609, 1516, 1365, 1320, 1170, 1144, 1073, 998; HRESIMS Calcd for  $[\text{C}_{24}\text{H}_{21}\text{BrKN}_2\text{O}_3\text{S}]^+$  ( $\text{M} + \text{K}^+$ ) 535.0088, found 535.0087.

**(S)-4-(6-bromo-10-(methylsulfonyl)cyclohepta[e]thieno[3,2-g]isoindol-8a(10H)-yl)-N,N-dimethylaniline (2ag)**

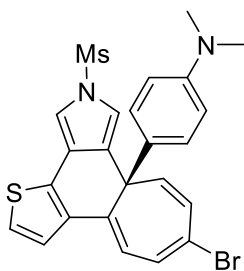

**2ag**

Compound **2ag** was prepared in 96% yield (49.1 mg) according to the general procedure in THF. Pale yellow solid (mp 211–212 °C).  $[\alpha]_D^{25} = 273.4^\circ$  ( $c = 1.0$ ,  $\text{CHCl}_3$ ). 53% ee (determined by HPLC: Chiralpak IG Column, 30/70 *i*-PrOH/hexane, 1.0 mL/min, 254 nm; TR = 9.07 min (major), 9.99 min (minor)).  $^1\text{H NMR}$  (400 MHz,

CDCl<sub>3</sub>)  $\delta$  7.26 (d,  $J$  = 5.6 Hz, 1H), 7.15 (d,  $J$  = 2.4 Hz, 1H), 7.13 (d,  $J$  = 5.6 Hz, 1H), 6.94 (d,  $J$  = 8.4 Hz, 2H), 6.77 (d,  $J$  = 2.0 Hz, 1H), 6.70 (s, 2H), 6.55 (d,  $J$  = 10.4 Hz, 1H), 6.43 (d,  $J$  = 8.8 Hz, 2H), 5.50 (d,  $J$  = 10.0 Hz, 1H), 3.06 (s, 3H), 2.83 (s, 6H); <sup>13</sup>C NMR (100 MHz, CDCl<sub>3</sub>)  $\delta$  148.8, 135.3, 134.5, 132.6, 132.5, 131.3, 130.2, 128.7, 127.6, 126.4, 125.2, 123.4, 122.7, 119.8, 118.8, 118.7, 111.6, 111.5, 47.8, 42.7, 40.4; IR (neat): 2924, 2854, 1609, 1517, 1455, 1363, 1262, 1172, 1065, 948; HRESIMS Calcd for [C<sub>24</sub>H<sub>21</sub>BrN<sub>2</sub>NaO<sub>2</sub>S<sub>2</sub>]<sup>+</sup> (M + Na<sup>+</sup>) 535.0120, found 535.0117.

**(R)-4-(8-bromo-2-(methylsulfonyl)-4,5-dihydrocyclohepta[e]isoindol-10a(2H)-yl)-N,N-dimethylaniline (2ah)**

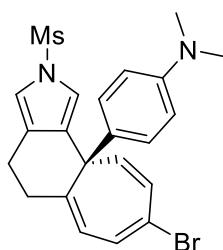

**2ah**

Compound **2ah** was prepared in 41% yield (18.9 mg) according to the general procedure employing **L25** as chiral ligand in 10 °C for 32 h. Pale yellow solid (mp 190–191 °C). [ $\alpha$ ]<sub>D</sub><sup>25</sup> = -57.9° (c = 1.0, CHCl<sub>3</sub>). 45% ee (determined by HPLC: Chiralpak IA Column, 10/90 *i*-PrOH/hexane, 1.0 mL/min, 254 nm; TR = 8.05 min (minor), 8.72 min (major)). <sup>1</sup>H NMR (400 MHz, CDCl<sub>3</sub>)  $\delta$  6.94 (d,  $J$  = 8.8 Hz, 2H), 6.81 (s, 1H), 6.50 (s, 1H), 6.48 (d,  $J$  = 6.8 Hz, 2H), 6.40 (s, 1H), 6.38 (s, 1H), 6.14 (d,  $J$  = 8.0 Hz, 1H), 4.79 (d,  $J$  = 9.6 Hz, 1H), 3.00 (s, 3H), 2.87 (s, 6H), 2.83 – 2.73 (m, 1H), 2.73 – 2.62 (m, 2H), 2.50 – 2.38 (m, 1H); <sup>13</sup>C NMR (100 MHz, CDCl<sub>3</sub>)  $\delta$  148.8, 135.5, 130.8, 130.0, 128.1, 127.6, 124.4, 124.0, 121.3, 120.7, 117.4, 114.8, 112.3, 111.4, 42.7, 42.5, 40.5, 33.5, 21.5; IR (neat): 3121, 2919, 1610, 1518, 1446, 1362, 1287, 1170, 1107, 1063; HRESIMS Calcd for [C<sub>22</sub>H<sub>23</sub>BrN<sub>2</sub>NaO<sub>2</sub>S]<sup>+</sup> (M + Na<sup>+</sup>) 481.0556, found 481.0549.

**(R)-4-(8-fluoro-2-(methylsulfonyl)-4,5-dihydrocyclohepta[e]isoindol-10a(2H)-yl)-N,N-dimethylaniline (2ai)**

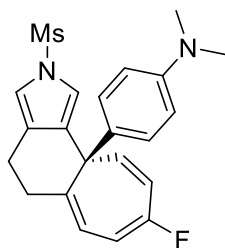

**2ai**

Compound **2ai** was prepared in 42% yield (16.8 mg) according to the general procedure employing **L25** as chiral ligand at 5 °C for 32 h. Pale yellow solid (mp 210–211 °C).  $[\alpha]_D^{25} = -9.4^\circ$  ( $c = 1.0$ ,  $\text{CHCl}_3$ ). 52% ee (determined by HPLC: Chiralpak IA Column, 10/90 *i*-PrOH/hexane, 1.0 mL/min, 254 nm; TR = 8.36 min (minor), 9.11 min (major)).  $^1\text{H NMR}$  (500 MHz,  $\text{CDCl}_3$ )  $\delta$  6.99 (d,  $J = 9.0$  Hz, 2H), 6.81 (s, 1H), 6.57 (d,  $J = 2.0$  Hz, 1H), 6.47 (d,  $J = 9.0$  Hz, 2H), 6.34 – 6.25 (m, 1H), 6.25 – 6.15 (m, 1H), 5.99 – 5.87 (m, 1H), 5.21 (dd,  $J = 10.0, 5.5$  Hz, 1H), 3.01 (s, 3H), 2.86 (s, 6H), 2.83 – 2.70 (m, 3H), 2.50 – 2.29 (m, 1H);  $^{13}\text{C NMR}$  (125 MHz,  $\text{CDCl}_3$ )  $\delta$  160.7 (d,  $J = 242.5$  Hz), 148.7, 136.1, 131.1, 127.8, 125.0(3), 124.9(7), 121.5 (d,  $J = 10.0$  Hz), 120.4 (d,  $J = 12.5$  Hz), 117.3, 116.7 (d,  $J = 32.5$  Hz), 114.7, 111.6 (d,  $J = 26.3$  Hz), 111.3, 44.6, 42.5, 40.4, 34.3, 22.1;  $^{19}\text{F NMR}$  (376 MHz,  $\text{CDCl}_3$ )  $\delta$  -107.05 – -107.29 (m); IR (neat): 2936, 2818, 1611, 1518, 1416, 1364, 1221, 1161, 1063, 1004; HRESIMS Calcd for  $[\text{C}_{22}\text{H}_{23}\text{FN}_2\text{NaO}_2\text{S}]^+$  ( $\text{M} + \text{Na}^+$ ) 421.1356, found 421.1346.

#### 4.2. General Procedure for Synthesis of Chiral Tetracyclopropanes **4**

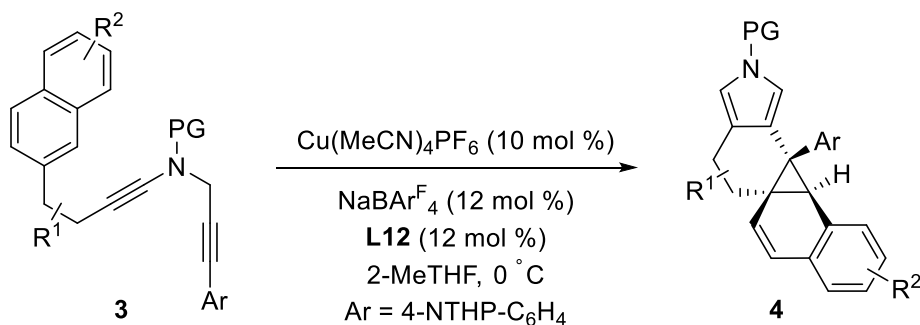

To an oven-dried Schlenk tube with a stir bar were sequentially added  $\text{Cu}(\text{MeCN})_4\text{PF}_6$  (0.015 mmol, 5.7 mg), **L12** (0.018 mmol, 15.0 mg) and  $\text{NaBAR}_4^{\text{F}}$  (0.0018 mmol, 16.2 mg, white crystal) under argon atmosphere. After injecting 2-MeTHF (1.5 mL) into the

Schlenk tube, the mixture was stirred at 25 °C for 2 h. Then the mixture reaction was cooled to 0 °C, and *N*-propargyl ynamide **3** (0.15 mmol) in 2-MeTHF (1.5 mL) was added into the reaction mixture dropwise. The progress of the reaction was monitored by TLC. Upon completion, the reaction mixture was concentrated under reduced pressure and purified by column chromatography on silica gel (eluent: PE/EtOAc) to afford the desired chiral benzonorcaradiene **4**.

**(3*b*S,3*c*S,9*a*R)-2-(methylsulfonyl)-3*b*-(4-(pyrrolidin-1-yl)phenyl)-3*b*,3*c*-dihydro-2*H*-benzo[*e*]naphtho[2',1':1,3]cyclopropa[1,2-*g*]isoindole (**4a**)**

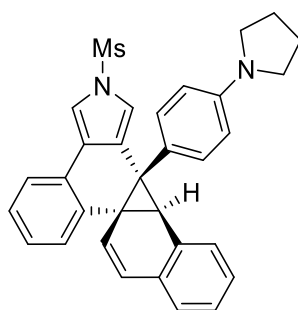

**4a**

Compound **4a** was prepared in 95% yield (71.9 mg) according to the general procedure. Pale yellow solid (mp 266–267 °C).  $[\alpha]_D^{25} = -514.5^\circ$  ( $c = 1.0$ ,  $\text{CHCl}_3$ ). 96% ee (determined by HPLC: Chiralpak IC Column, 20/80 *i*-PrOH/hexane, 1.0 mL/min, 254 nm; TR = 9.78 min (major), 11.86 min (minor)).  $^1\text{H}$  NMR (400 MHz,  $\text{CDCl}_3$ )  $\delta$  7.63 (d,  $J = 6.8$  Hz, 1H), 7.45 (d,  $J = 2.0$  Hz, 1H), 7.38 – 7.30 (m, 2H), 7.30 – 7.19 (m, 3H), 7.13 – 7.03 (m, 1H), 6.91 (d,  $J = 7.2$  Hz, 1H), 6.83 (dd,  $J = 8.4, 1.6$  Hz, 1H), 6.57 (d,  $J = 2.0$  Hz, 1H), 6.55 (dd,  $J = 8.4, 1.6$  Hz, 1H), 6.39 – 6.29 (m, 2H), 6.21 (d,  $J = 10.0$  Hz, 1H), 6.05 (dd,  $J = 8.3, 2.0$  Hz, 1H), 3.22 – 3.10 (m, 4H), 3.07 (s, 3H), 2.62 (s, 1H), 1.98 – 1.81 (m, 4H);  $^{13}\text{C}$  NMR (100 MHz,  $\text{CDCl}_3$ )  $\delta$  146.0, 137.9, 133.3, 132.1, 131.4, 131.3, 131.2, 129.9, 128.9, 127.5, 127.4(0), 127.3(7), 127.3, 126.1, 126.0, 125.9, 125.3, 124.0, 123.1, 121.6, 118.7, 113.7, 111.6, 109.6, 47.4, 42.7, 41.5, 37.3, 27.9, 25.4; IR (neat): 2928, 2855, 1608, 1521, 1461, 1362, 1246, 1165, 1056; HRESIMS Calcd for  $[\text{C}_{32}\text{H}_{28}\text{KN}_2\text{O}_2\text{S}]^+$  ( $\text{M} + \text{K}^+$ ) 543.1503, found 543.1518.

**(3b*S*,3c*S*,9a*R*)-3b-(4-(pyrrolidin-1-yl)phenyl)-2-tosyl-3b,3c-dihydro-2*H*-benzo[*e*]naphtho[2',1':1,3]cyclopropa[1,2-*g*]isoindole (4b)**

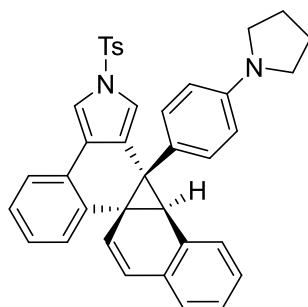

**4b**

Compound **4b** was prepared in 73% yield (63.6 mg) according to the general procedure. Pale yellow solid (mp 175–176 °C).  $[\alpha]_D^{25} = -408.7^\circ$  ( $c = 1.0$ ,  $\text{CHCl}_3$ ). 92% ee (determined by HPLC: Chiralpak IC Column, 10/90 *i*-PrOH/hexane, 1.0 mL/min, 254 nm; TR = 10.96 min (major), 12.24 min (minor)).  $^1\text{H}$  NMR (400 MHz,  $\text{CDCl}_3$ )  $\delta$  7.68 (d,  $J = 8.4$  Hz, 2H), 7.59 (d,  $J = 6.8$  Hz, 1H), 7.48 (d,  $J = 2.0$  Hz, 1H), 7.36 – 7.21 (m, 5H), 7.21 – 7.14 (m, 2H), 7.11 – 7.03 (m, 1H), 6.88 (d,  $J = 7.6$  Hz, 1H), 6.76 (d,  $J = 8.0$  Hz, 1H), 6.62 (d,  $J = 2.4$  Hz, 1H), 6.50 (d,  $J = 8.4$  Hz, 1H), 6.34 (dd,  $J = 8.4, 1.6$  Hz, 1H), 6.30 (d,  $J = 10.0$  Hz, 1H), 6.15 (d,  $J = 9.6$  Hz, 1H), 6.03 (d,  $J = 8.0$  Hz, 1H), 3.34 – 2.86 (m, 4H), 2.56 (s, 1H), 2.36 (s, 3H), 2.02 – 1.77 (m, 4H);  $^{13}\text{C}$  NMR (100 MHz,  $\text{CDCl}_3$ )  $\delta$  146.0, 144.8, 137.8, 136.0, 133.3, 132.2, 131.4, 131.3, 131.1, 129.9, 128.9, 127.4, 127.2, 126.8, 126.0, 125.4, 124.1, 123.0, 121.9, 119.1, 113.9, 111.7, 109.5, 47.4, 41.4, 37.4, 28.0, 25.4, 21.6; IR (neat): 2963, 2926, 1613, 1526, 1461, 1332, 1261, 1147, 1066, 965; HRESIMS Calcd for  $[\text{C}_{38}\text{H}_{32}\text{N}_2\text{NaO}_2\text{S}]^+$  ( $\text{M} + \text{Na}^+$ ) 603.2077, found 603.2072.

**(3b*S*,3c*S*,9a*R*)-2-(phenylsulfonyl)-3b-(4-(pyrrolidin-1-yl)phenyl)-3b,3c-dihydro-2*H*-benzo[*e*]naphtho[2',1':1,3]cyclopropa[1,2-*g*]isoindole (4c)**

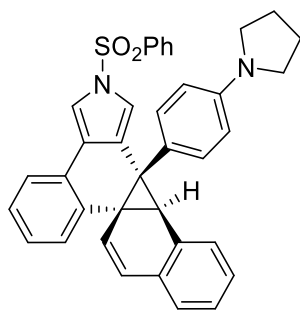

**4c**

Compound **4c** was prepared in 98% yield (83.3 mg) according to the general procedure. Pale yellow solid (mp 186–187 °C).  $[\alpha]_D^{25} = -486.1^\circ$  ( $c = 1.0$ ,  $\text{CHCl}_3$ ). 90% ee (determined by HPLC: Chiralpak IE Column, 50/50 *i*-PrOH/hexane, 1.0 mL/min, 254 nm; TR = 7.96 min (minor), 12.03 min (major)).  $^1\text{H}$  NMR (400 MHz,  $\text{CDCl}_3$ )  $\delta$  7.80 (d,  $J = 7.6$  Hz, 2H), 7.61 (d,  $J = 6.8$  Hz, 1H), 7.58 – 7.52 (m, 1H), 7.50 (d,  $J = 2.0$  Hz, 1H), 7.48 – 7.40 (m, 2H), 7.37 – 7.23 (m, 3H), 7.20 – 7.16 (m, 2H), 7.14 – 7.05 (m, 1H), 6.89 (d,  $J = 7.6$  Hz, 1H), 6.76 (d,  $J = 7.6$  Hz, 1H), 6.63 (d,  $J = 1.6$  Hz, 1H), 6.58 – 6.46 (m, 1H), 6.42 – 6.26 (m, 2H), 6.16 (d,  $J = 10.0$  Hz, 1H), 6.09 – 5.89 (m, 1H), 3.29 – 3.06 (m, 4H), 2.56 (s, 1H), 2.00 – 1.83 (m, 4H);  $^{13}\text{C}$  NMR (100 MHz,  $\text{CDCl}_3$ )  $\delta$  146.0, 139.0, 137.9, 133.7, 133.3, 132.1, 131.4, 131.3, 129.9, 129.3, 128.9, 127.3(9), 127.3(4), 127.2(9), 127.2(5), 126.8, 126.0(1), 126.0(0), 125.9, 125.3, 124.0, 123.1, 122.1, 119.2, 114.0, 111.7, 109.5, 47.4, 41.5, 37.4, 27.9, 25.4; IR (neat): 2965, 2849, 1613, 1526, 1448, 1333, 1261, 1148, 1044, 816; HRESIMS Calcd for  $[\text{C}_{37}\text{H}_{30}\text{N}_2\text{NaO}_2\text{S}]^+$  ( $\text{M} + \text{Na}^+$ ) 589.1920, found 589.1913.

**(3bS,3cS,9aR)-2-((4-bromophenyl)sulfonyl)-3b-(4-(pyrrolidin-1-yl)phenyl)-3b,3c-dihydro-2H-benzo[*e*]naphtho[2',1':1,3]cyclopropa[1,2-*g*]isoindole (4d)**

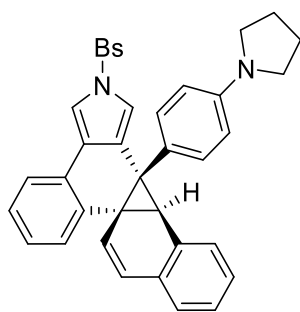

**4d**



Compound **4d** was prepared in 96% yield (93.0 mg) according to the general procedure. Pale yellow solid (mp 175–176 °C).  $[\alpha]_D^{25} = -427.8^\circ$  ( $c = 1.0$ ,  $\text{CHCl}_3$ ). 93% ee (determined by HPLC: Chiralpak IG Column, 50/50 *i*-PrOH/hexane, 1.0 mL/min, 254 nm; TR = 8.38 min (minor), 15.47 min (major)).  $^1\text{H NMR}$  (400 MHz,  $\text{CDCl}_3$ )  $\delta$  7.73 – 7.50 (m, 5H), 7.47 (d,  $J = 1.6$  Hz, 1H), 7.37 – 7.22 (m, 3H), 7.20 – 7.13 (m, 2H), 7.11 – 7.05 (m, 1H), 6.88 (d,  $J = 7.2$  Hz, 1H), 6.76 (d,  $J = 7.6$  Hz, 1H), 6.60 (d,  $J = 1.6$  Hz, 1H), 6.50 (d,  $J = 8.0$  Hz, 1H), 6.40 – 6.25 (m, 2H), 6.15 (d,  $J = 9.6$  Hz, 1H), 6.03 (d,  $J = 7.2$  Hz, 1H), 3.28 – 2.89 (m, 4H), 2.57 (s, 1H), 2.09 – 1.75 (m, 4H);  $^{13}\text{C NMR}$  (100 MHz,  $\text{CDCl}_3$ )  $\delta$  146.0, 137.9, 137.8, 133.2, 132.6, 132.0, 131.8, 131.3, 129.9, 128.9, 128.2, 127.5, 127.4(0), 127.3(5), 127.3, 126.0(4), 126.0(1), 125.8, 125.1, 123.9, 123.1, 122.4, 119.0, 113.9, 111.7, 109.5, 47.4, 41.5, 37.4, 27.9, 25.3; IR (neat): 2966, 2918, 1613, 1527, 1478, 1376, 1261, 1183, 1045, 965; HRESIMS Calcd for  $[\text{C}_{37}\text{H}_{29}\text{BrN}_2\text{NaO}_2\text{S}]^+$  ( $\text{M} + \text{Na}^+$ ) 667.1025, found 667.1023.

**(3b*S*,3c*S*,9a*R*)-2-((4-methoxyphenyl)sulfonyl)-3b-(4-(pyrrolidin-1-yl)phenyl)-3b,3c-dihydro-2*H*-benzo[*e*]naphtho[2',1':1,3]cyclopropa[1,2-*g*]isoindole (**4e**)**

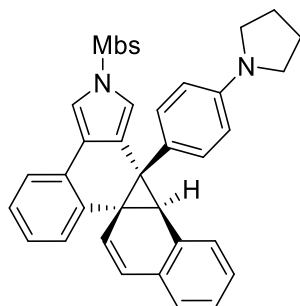

**4e**

Compound **4e** was prepared in 93% yield (85.3 mg) according to the general procedure. Pale yellow solid (mp 180–181 °C).  $[\alpha]_D^{25} = -494.3^\circ$  ( $c = 1.0$ ,  $\text{CHCl}_3$ ). 93% ee (determined by HPLC: Chiralpak IC Column, 20/80 *i*-PrOH/hexane, 1.0 mL/min, 254 nm; TR = 10.25 min (major), 11.33 min (minor)).  $^1\text{H NMR}$  (400 MHz,  $\text{CDCl}_3$ )  $\delta$  7.74 (d,  $J = 8.8$  Hz, 2H), 7.59 (d,  $J = 7.2$  Hz, 1H), 7.47 (s, 1H), 7.35 – 7.25 (m, 2H), 7.25 – 7.14 (m, 3H), 7.12 – 7.06 (m, 1H), 6.98 – 6.85 (m, 3H), 6.77 (d,  $J = 8.0$  Hz, 1H), 6.61 (s, 1H), 6.50 (d,  $J = 7.6$  Hz, 1H), 6.40 – 6.24 (m, 2H), 6.15 (d,  $J = 10.0$  Hz, 1H), 6.03

(d,  $J = 7.2$  Hz, 1H), 3.79 (s, 3H), 3.34 – 2.95 (m, 4H), 2.56 (s, 1H), 2.06 – 1.74 (m, 4H);  $^{13}\text{C}$  NMR (100 MHz,  $\text{CDCl}_3$ )  $\delta$  163.7, 146.0, 137.8, 133.3, 132.2, 131.4, 131.3, 130.9, 130.4, 129.9, 129.1, 128.9, 127.4, 127.2(3), 127.2(0), 126.0(0), 125.9(7), 125.5, 124.1, 123.0, 121.7, 119.0, 114.5, 113.8, 111.7, 109.5, 55.6, 47.4, 41.4, 37.4, 28.0, 25.4; IR (neat): 2964, 2926, 1613, 1577, 1461, 1372, 1263, 1165, 1044, 832; HRESIMS Calcd for  $[\text{C}_{38}\text{H}_{32}\text{N}_2\text{NaO}_3\text{S}]^+$  ( $\text{M} + \text{Na}^+$ ) 619.2026, found 619.2028.

**(3b*S*,3c*S*,9a*R*)-11-fluoro-2-(methylsulfonyl)-3b-(4-(pyrrolidin-1-yl)phenyl)-3b,3c-dihydro-2*H*-benzo[*e*]naphtho[2',1':1,3]cyclopropa[1,2-*g*]isoindole (4f)**

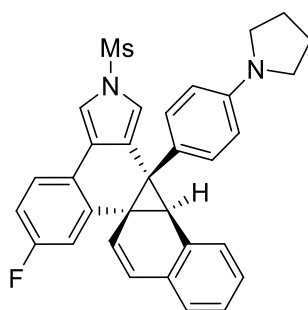

**4f**

Compound **4f** was prepared in 80% yield (62.7 mg) according to the general procedure. Pale yellow solid (mp 267–268 °C).  $[\alpha]_{\text{D}}^{25} = -579.4^\circ$  ( $c = 1.0$ ,  $\text{CHCl}_3$ ). 94% ee (determined by HPLC: Chiralpak IE Column, 20/80 *i*-PrOH/hexane, 1.0 mL/min, 254 nm; TR = 9.21 min (minor), 11.36 min (major)).  $^1\text{H}$  NMR (400 MHz,  $\text{CDCl}_3$ )  $\delta$  7.62 – 7.58 (m, 1H), 7.41 (d,  $J = 2.0$  Hz, 1H), 7.36 (d,  $J = 7.6$  Hz, 1H), 7.23 (d,  $J = 7.6$  Hz, 1H), 7.15 – 7.09 (m, 1H), 7.06 (dd,  $J = 10.0, 2.8$  Hz, 1H), 7.01 – 6.88 (m, 2H), 6.82 (dd,  $J = 8.8, 2.0$  Hz, 1H), 6.58 (d,  $J = 1.6$  Hz, 1H), 6.54 (dd,  $J = 8.4, 1.6$  Hz, 1H), 6.44 – 6.28 (m, 2H), 6.16 (d,  $J = 9.6$  Hz, 1H), 6.06 (dd,  $J = 8.4, 2.4$  Hz, 1H), 3.26 – 3.13 (m, 4H), 3.12 (s, 3H), 2.64 (s, 1H), 1.94 (m, 4H);  $^{13}\text{C}$  NMR (100 MHz,  $\text{CDCl}_3$ )  $\delta$  162.2 (d,  $J = 245.0$  Hz), 146.1, 140.3 (d,  $J = 7.0$  Hz), 133.2, 131.8, 131.3, 131.2, 130.8, 128.9, 127.9, 127.6, 127.4, 126.2, 125.0, 124.7 (d,  $J = 8.0$  Hz), 123.6, 121.5 (d,  $J = 3.0$  Hz), 120.9, 118.8, 116.6 (d,  $J = 22.6$  Hz), 113.3(3) (d,  $J = 21.0$  Hz), 113.3(0), 111.7, 109.7, 47.4, 42.7, 41.5, 37.3, 28.1, 25.4;  $^{19}\text{F}$  NMR (376 MHz,  $\text{CDCl}_3$ )  $\delta$  -114.0 (s); IR (neat):

2964, 2851, 1614, 1558, 1463, 1371, 1260, 1171, 1073, 980; HRESIMS Calcd for  $[\text{C}_{32}\text{H}_{27}\text{FN}_2\text{NaO}_2\text{S}]^+$  ( $\text{M} + \text{Na}^+$ ) 545.1669, found 545.1663.

**(3b*S*,3c*S*,9a*R*)-11-chloro-2-(methylsulfonyl)-3b-(4-(pyrrolidin-1-yl)phenyl)-3b,3c-dihydro-2*H*-benzo[*e*]naphtho[2',1':1,3]cyclopropa[1,2-*g*]isoindole (4g)**

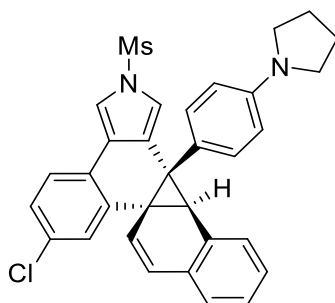

**4g**

Compound **4g** was prepared in 87% yield (70.4 mg) according to the general procedure. Pale yellow solid (mp 239–240 °C).  $[\alpha]_{\text{D}}^{25} = -537.8^\circ$  ( $c = 1.0$ ,  $\text{CHCl}_3$ ). 96% ee (determined by HPLC: Chiralpak IE Column, 20/80 *i*-PrOH/hexane, 1.0 mL/min, 254 nm; TR = 9.19 min (minor), 11.38 min (major)).  $^1\text{H}$  NMR (400 MHz,  $\text{CDCl}_3$ )  $\delta$  7.55 (d,  $J = 8.0$  Hz, 1H), 7.44 (d,  $J = 2.0$  Hz, 1H), 7.34 (d,  $J = 7.2$  Hz, 1H), 7.32 (d,  $J = 2.0$  Hz, 1H), 7.24 – 7.18 (m, 2H), 7.15 – 7.03 (m, 1H), 6.92 (d,  $J = 7.2$  Hz, 1H), 6.81 (dd,  $J = 8.4$ , 2.0 Hz, 1H), 6.58 (d,  $J = 2.0$  Hz, 1H), 6.54 (dd,  $J = 8.4$ , 1.6 Hz, 1H), 6.42 – 6.31 (m, 2H), 6.15 (d,  $J = 9.6$  Hz, 1H), 6.11 – 6.00 (m, 1H), 3.29 – 3.12 (m, 4H), 3.11 (s, 3H), 2.62 (s, 1H), 2.01 – 1.78 (m, 4H);  $^{13}\text{C}$  NMR (100 MHz,  $\text{CDCl}_3$ )  $\delta$  146.1, 139.7, 133.2, 132.9, 131.7, 131.3, 131.1, 130.9, 129.9, 128.9, 127.9, 127.7, 127.4, 126.3, 126.2, 125.0, 124.4, 123.9, 123.6, 120.7, 118.8, 113.8, 111.7, 109.7, 47.4, 42.7, 41.4, 37.0, 28.0, 25.4; IR (neat): 2964, 2854, 1614, 1526, 1463, 1337, 1260, 1170, 1067, 983; HRESIMS Calcd for  $[\text{C}_{32}\text{H}_{28}\text{ClN}_2\text{O}_2\text{S}]^+$  ( $\text{M} + \text{H}^+$ ) 539.1555, found 539.1551.

**(3b*S*,3c*S*,9a*R*)-11-methyl-2-(methylsulfonyl)-3b-(4-(pyrrolidin-1-yl)phenyl)-3b,3c-dihydro-2*H*-benzo[*e*]naphtho[2',1':1,3]cyclopropa[1,2-*g*]isoindole (4h)**

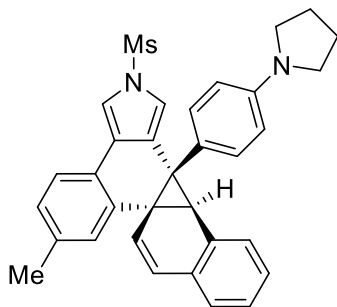

**4h**

Compound **4h** was prepared in 85% yield (66.1 mg) according to the general procedure. Pale yellow solid (mp 277–278 °C).  $[\alpha]_D^{25} = -511.9^\circ$  ( $c = 1.0$ ,  $\text{CHCl}_3$ ). 95% ee (determined by HPLC: Chiralpak IA Column, 20/80 *i*-PrOH/hexane, 1.0 mL/min, 254 nm; TR = 10.05 min (major), 13.32 min (minor)).  $^1\text{H}$  NMR (400 MHz,  $\text{CDCl}_3$ )  $\delta$  7.54 (d,  $J = 8.0$  Hz, 1H), 7.42 (d,  $J = 2.4$  Hz, 1H), 7.35 (d,  $J = 7.2$  Hz, 1H), 7.23 – 7.18 (m, 1H), 7.15 (s, 1H), 7.13 – 7.04 (m, 2H), 6.92 (d,  $J = 7.2$  Hz, 1H), 6.83 (dd,  $J = 8.4, 2.0$  Hz, 1H), 6.63 – 6.50 (m, 2H), 6.43 – 6.32 (m, 2H), 6.22 (d,  $J = 9.6$  Hz, 1H), 6.05 (dd,  $J = 8.4, 2.4$  Hz, 1H), 3.25 – 3.12 (m, 4H), 3.10 (s, 3H), 2.61 (s, 1H), 2.36 (s, 3H), 2.00 – 1.82 (m, 4H);  $^{13}\text{C}$  NMR (100 MHz,  $\text{CDCl}_3$ )  $\delta$  146.1, 137.9, 137.3, 133.3, 132.1, 131.4(3), 131.3(6), 131.2, 130.5, 128.9, 127.5, 127.3(3), 127.3(0), 127.0, 126.1, 126.0, 124.1, 123.1, 122.5, 121.8, 118.8, 113.3, 111.7, 109.7, 47.4, 42.7, 41.6, 37.3, 28.0, 25.4, 21.4; IR (neat): 2964, 2853, 1615, 1521, 1456, 1373, 1260, 1170, 1063; HRESIMS Calcd for  $[\text{C}_{33}\text{H}_{31}\text{N}_2\text{O}_2\text{S}]^+$  ( $\text{M} + \text{H}^+$ ) 519.2101, found 519.2111.

**(3b*S*,3c*S*,9a*R*)-11-methoxy-2-(methylsulfonyl)-3b-(4-(pyrrolidin-1-yl)phenyl)-3b,3c-dihydro-2*H*-benzo[*e*]naphtho[2',1':1,3]cyclopropa[1,2-*g*]isoindole (4i)**

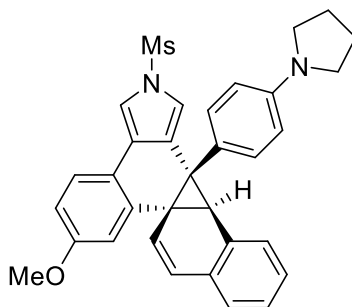

**4i**

Compound **4i** was prepared in 96% yield (78.0 mg) according to the general procedure. Pale yellow solid (mp 185–186 °C).  $[\alpha]_D^{25} = -476.1^\circ$  ( $c = 1.0$ ,  $\text{CHCl}_3$ ). 95% ee (determined by HPLC: Chiralpak IE Column, 30/70 *i*-PrOH/hexane, 1.0 mL/min, 254 nm; TR = 11.20 min (minor), 16.27 min (major)).  $^1\text{H}$  NMR (400 MHz,  $\text{CDCl}_3$ )  $\delta$  7.55 (d,  $J = 8.4$  Hz, 1H), 7.43 – 7.29 (m, 2H), 7.22 – 7.19 (m, 1H), 7.14 – 7.01 (m, 1H), 6.91 (d,  $J = 7.2$  Hz, 1H), 6.88 (d,  $J = 2.4$  Hz, 1H), 6.86 – 6.77 (m, 2H), 6.62 – 6.47 (m, 2H), 6.45 – 6.31 (m, 2H), 6.21 (d,  $J = 10.0$  Hz, 1H), 6.05 (dd,  $J = 8.4, 2.0$  Hz, 1H), 3.80 (s, 3H), 3.26 – 3.08 (m, 4H), 3.07 (s, 3H), 2.64 (s, 1H), 2.03 – 1.68 (m, 4H);  $^{13}\text{C}$  NMR (100 MHz,  $\text{CDCl}_3$ )  $\delta$  159.2, 146.0, 139.6, 133.3, 132.1, 131.4, 131.3, 130.8, 128.9, 127.6, 127.5, 127.3, 126.1, 125.7, 124.4, 124.0, 121.6, 118.7, 118.1, 114.8, 112.5, 112.4, 111.6, 109.6, 55.3, 47.4, 42.6, 41.6, 37.5, 28.1, 25.4; IR (neat): 2963, 2837, 1612, 1569, 1463, 1321, 1261, 1170, 1042; HRESIMS Calcd for  $[\text{C}_{33}\text{H}_{31}\text{N}_2\text{O}_3\text{S}]^+$  ( $\text{M} + \text{H}^+$ ) 535.2050, found 535.2029.

**(3b*S*,3c*S*,9a*R*)-12-fluoro-2-(methylsulfonyl)-3b-(4-(pyrrolidin-1-yl)phenyl)-3b,3c-dihydro-2*H*-benzo[*e*]naphtho[2',1':1,3]cyclopropa[1,2-*g*]isoindole (**4j**)**

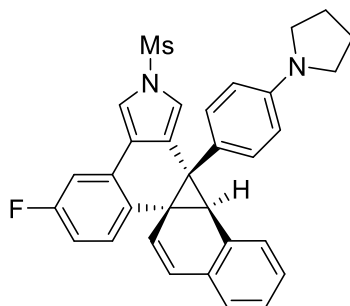

**4j**

Compound **4j** was prepared in 98% yield (76.8 mg) according to the general procedure. Pale yellow solid (mp 280–281 °C).  $[\alpha]_D^{25} = -613.4^\circ$  ( $c = 1.0$ ,  $\text{CHCl}_3$ ). 95% ee (determined by HPLC: Chiralpak IE Column, 10/90 *i*-PrOH/hexane, 1.0 mL/min, 254 nm; TR = 12.83 min (minor), 16.75 min (major)).  $^1\text{H}$  NMR (400 MHz,  $\text{CDCl}_3$ )  $\delta$  7.44 (d,  $J = 2.0$  Hz, 1H), 7.35 (d,  $J = 7.2$  Hz, 1H), 7.32 – 7.26 (m, 2H), 7.22 (dd,  $J = 7.6, 1.2$  Hz, 1H), 7.15 – 7.07 (m, 1H), 7.01 – 6.95 (m, 1H), 6.92 (d,  $J = 7.6$  Hz, 1H), 6.82 (dd,  $J = 8.4, 2.0$  Hz, 1H), 6.59 (d,  $J = 2.4$  Hz, 1H), 6.54 (dd,  $J = 8.4, 2.0$  Hz, 1H), 6.40 –

6.25 (m, 2H), 6.18 (s, 1H), 6.05 (dd,  $J = 8.4, 2.4$  Hz, 1H), 3.25 – 3.13 (m, 4H), 3.12 (s, 3H), 2.58 (s, 1H), 2.00 – 1.78 (m, 4H);  $^{13}\text{C}$  NMR (100 MHz,  $\text{CDCl}_3$ )  $\delta$  161.3 (d,  $J = 243$  Hz), 146.1, 133.8, 133.7, 133.3, 131.9, 131.6 (d,  $J = 9.0$  Hz), 131.4, 131.2, 128.9, 127.6, 127.5, 127.4, 127.1 (d,  $J = 8.0$  Hz), 126.1, 125.7, 123.7, 121.0 (d,  $J = 2.0$  Hz), 118.9, 114.3 (d,  $J = 21.0$  Hz), 114.2, 111.6, 109.6, 109.4 (d,  $J = 23.0$  Hz), 47.4, 42.7, 41.3, 36.8, 27.7, 25.4;  $^{19}\text{F}$  NMR (376 MHz,  $\text{CDCl}_3$ )  $\delta$  -116.6 (s); IR (neat): 2965, 2852, 1613, 1557, 1462, 1370, 1259, 1143, 1067, 982; HRESIMS Calcd for  $[\text{C}_{32}\text{H}_{27}\text{FKN}_2\text{O}_2\text{S}]^+$  ( $\text{M} + \text{K}^+$ ) 561.1409, found 561.1420.

**(3b*S*,3c*S*,9a*R*)-12-chloro-2-(methylsulfonyl)-3b-(4-(pyrrolidin-1-yl)phenyl)-3b,3c-dihydro-2*H*-benzo[*e*]naphtho[2',1':1,3]cyclopropa[1,2-*g*]isoindole (4k)**

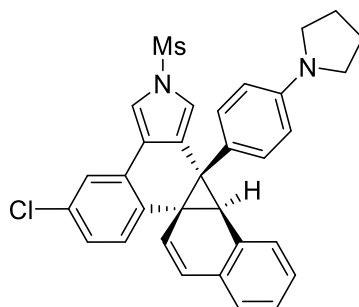

**4k**

Compound **4k** was prepared in 94% yield (76.0 mg) according to the general procedure. Pale yellow solid (mp 255–256 °C).  $[\alpha]_{\text{D}}^{25} = -514.4^\circ$  ( $c = 1.0$ ,  $\text{CHCl}_3$ ). 95% ee (determined by HPLC: Chiralpak IE Column, 10/90 *i*-PrOH/hexane, 1.0 mL/min, 254 nm; TR = 13.86 min (minor), 17.31 min (major)).  $^1\text{H}$  NMR (400 MHz,  $\text{CDCl}_3$ )  $\delta$  7.60 (d,  $J = 1.6$  Hz, 1H), 7.45 (d,  $J = 2.4$  Hz, 1H), 7.35 (d,  $J = 7.2$  Hz, 1H), 7.27 – 7.23 (m, 2H), 7.22 – 7.19 (m, 1H), 7.15 – 7.06 (m, 1H), 6.91 (d,  $J = 7.2$  Hz, 1H), 6.80 (dd,  $J = 8.4, 2.0$  Hz, 1H), 6.58 (d,  $J = 2.4$  Hz, 1H), 6.53 (dd,  $J = 8.4, 2.0$  Hz, 1H), 6.40 – 6.28 (m, 2H), 6.14 (d,  $J = 10.0$  Hz, 1H), 6.05 (dd,  $J = 8.8, 2.4$  Hz, 1H), 3.23 – 3.11 (m, 4H), 3.09 (s, 3H), 2.59 (s, 1H), 1.97 – 1.83 (m, 4H);  $^{13}\text{C}$  NMR (100 MHz,  $\text{CDCl}_3$ )  $\delta$  146.1, 136.3, 133.2, 132.0, 131.8, 131.4, 131.2, 131.0, 128.9, 127.7, 127.6, 127.4, 127.2, 127.1, 126.2, 125.4, 123.6, 122.9, 120.6, 118.9, 114.2, 111.6, 109.7, 47.4, 42.8, 41.4, 36.9,

27.9, 25.4; IR (neat): 2963, 2853, 1613, 1558, 1475, 1368, 1260, 1170, 1066, 982; HRESIMS Calcd for  $[C_{32}H_{27}ClN_2NaO_2S]^+$  ( $M + Na^+$ ) 561.1374, found 561.1380.

**(3*b*S,3*c*S,9*a*R)-12-methyl-2-(methylsulfonyl)-3*b*-(4-(pyrrolidin-1-yl)phenyl)-3*b*,3*c*-dihydro-2*H*-benzo[*e*]naphtho[2',1':1,3]cyclopropa[1,2-*g*]isoindole (4*l*)**

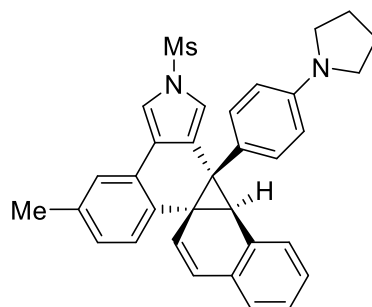

**4l**

Compound **4l** was prepared in 94% yield (73.1 mg) according to the general procedure. Pale yellow solid (mp 256–257 °C).  $[\alpha]_D^{25} = -498.2^\circ$  ( $c = 1.0$ ,  $CHCl_3$ ). 96% ee (determined by HPLC: Chiralpak IE Column, 20/80 *i*-PrOH/hexane, 1.0 mL/min, 254 nm; TR = 9.18 min (minor), 11.58 min (major)).  $^1H$  NMR (400 MHz,  $CDCl_3$ )  $\delta$  7.54 – 7.41 (m, 2H), 7.34 (d,  $J = 7.6$  Hz, 1H), 7.23 – 7.17 (m, 2H), 7.14 – 7.02 (m, 2H), 6.91 (d,  $J = 7.6$  Hz, 1H), 6.82 (dd,  $J = 8.4, 2.0$  Hz, 1H), 6.56 (d,  $J = 2.0$  Hz, 1H), 6.54 (dd,  $J = 8.4, 2.0$  Hz, 1H), 6.42 – 6.28 (m, 2H), 6.20 (d,  $J = 9.6$  Hz, 1H), 6.13 – 5.96 (m, 1H), 3.25 – 3.11 (m, 4H), 3.08 (s, 3H), 2.59 (s, 1H), 2.37 (s, 3H), 1.99 – 1.78 (m, 4H);  $^{13}C$  NMR (100 MHz,  $CDCl_3$ )  $\delta$  146.0, 135.6, 135.2, 133.3, 132.2, 131.4(1), 131.3(7), 129.8, 128.9, 128.4, 127.4, 127.3, 126.1, 126.0, 125.1, 124.1, 123.6, 121.8, 118.8, 113.6, 111.7, 109.6, 47.4, 42.6, 41.6, 37.2, 27.8, 25.4, 21.0; IR (neat): 2963, 2854, 1614, 1522, 1463, 1368, 1262, 1172, 1068, 982; HRESIMS Calcd for  $[C_{33}H_{30}N_2NaO_2S]^+$  ( $M + Na^+$ ) 541.1920, found 541.1909.

**(3*b*S,3*c*S,9*a*R)-12-methoxy-2-(methylsulfonyl)-3*b*-(4-(pyrrolidin-1-yl)phenyl)-3*b*,3*c*-dihydro-2*H*-benzo[*e*]naphtho[2',1':1,3]cyclopropa[1,2-*g*]isoindole (4*m*)**

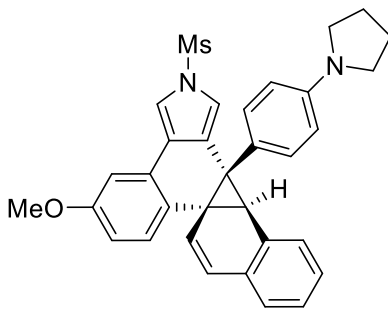

**4m**

Compound **4m** was prepared in 89% yield (71.4 mg) according to the general procedure. Pale yellow solid (mp 174–175 °C).  $[\alpha]_D^{25} = -501.0^\circ$  ( $c = 1.0$ ,  $\text{CHCl}_3$ ). 92% ee (determined by HPLC: Chiralpak IE Column, 20/80 *i*-PrOH/hexane, 1.0 mL/min, 254 nm; TR = 13.52 min (minor), 17.88 min (major)).  $^1\text{H}$  NMR (400 MHz,  $\text{CDCl}_3$ )  $\delta$  7.45 (d,  $J = 2.0$  Hz, 1H), 7.34 (d,  $J = 7.6$  Hz, 1H), 7.27 – 7.20 (m, 2H), 7.15 (d,  $J = 2.8$  Hz, 1H), 7.12 – 7.05 (m, 1H), 6.93 – 6.79 (m, 3H), 6.57 (d,  $J = 2.4$  Hz, 1H), 6.54 (dd,  $J = 8.4, 2.0$  Hz, 1H), 6.39 – 6.28 (m, 2H), 6.19 (d,  $J = 10.0$  Hz, 1H), 6.05 (dd,  $J = 8.4, 2.4$  Hz, 1H), 3.84 (s, 3H), 3.24 – 3.13 (m, 4H), 3.09 (s, 3H), 2.57 (s, 1H), 2.01 – 1.81 (m, 4H);  $^{13}\text{C}$  NMR (100 MHz,  $\text{CDCl}_3$ )  $\delta$  157.9, 146.0, 133.3, 132.2, 131.4(4), 131.4(1), 131.3, 131.0, 130.7, 128.9, 127.4, 127.3, 126.3, 126.2, 125.9, 124.1, 121.7, 118.8, 113.8(4), 113.8(1), 111.6, 109.6, 107.6, 55.4, 47.4, 42.7, 41.5, 36.9, 27.5, 25.4; IR (neat): 2965, 2928, 1613, 1521, 1463, 1367, 1263, 1171, 1067, 982; HRESIMS Calcd for  $[\text{C}_{33}\text{H}_{30}\text{N}_2\text{NaO}_3\text{S}]^+$  ( $\text{M} + \text{Na}^+$ ) 557.1869, found 557.1839.

**(3b*S*,3c*S*,9a*R*)-7-methyl-2-(methylsulfonyl)-3b-(4-(pyrrolidin-1-yl)phenyl)-3b,3c-dihydro-2*H*-benzo[*e*]naphtho[2',1':1,3]cyclopropa[1,2-*g*]isoindole (4n)**

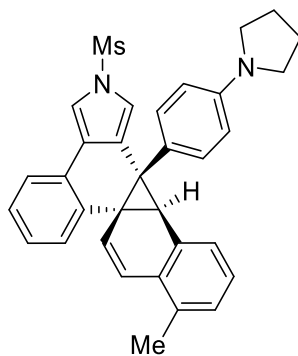

**4n**



Compound **4n** was prepared in 95% yield (73.9 mg) according to the general procedure. Pale yellow solid (mp 264–265 °C).  $[\alpha]_D^{25} = -563.1^\circ$  ( $c = 1.0$ ,  $\text{CHCl}_3$ ). 94% ee (determined by HPLC: Chiralpak IE Column, 20/80 *i*-PrOH/hexane, 1.0 mL/min, 254 nm; TR = 8.90 min (minor), 11.90 min (major)).  $^1\text{H NMR}$  (400 MHz,  $\text{CDCl}_3$ )  $\delta$  7.68 – 7.57 (m, 1H), 7.46 (d,  $J = 2.0$  Hz, 1H), 7.38 – 7.31 (m, 1H), 7.30 – 7.24 (m, 2H), 7.22 – 7.17 (m, 1H), 7.15 – 7.08 (m, 1H), 6.95 (d,  $J = 7.2$  Hz, 1H), 6.83 (dd,  $J = 8.4$ , 1.6 Hz, 1H), 6.65 – 6.45 (m, 3H), 6.37 (dd,  $J = 8.4$ , 2.0 Hz, 1H), 6.25 (d,  $J = 10.0$  Hz, 1H), 6.05 (dd,  $J = 8.4$ , 2.0 Hz, 1H), 3.32 – 3.13 (m, 4H), 3.09 (s, 3H), 2.62 (s, 1H), 2.18 (s, 3H), 2.02 – 1.84 (m, 4H);  $^{13}\text{C NMR}$  (100 MHz,  $\text{CDCl}_3$ )  $\delta$  146.1, 137.9, 133.9, 133.1, 132.1, 131.4, 131.3, 129.9, 129.6, 127.9, 127.4, 127.1, 127.0, 126.1, 126.0, 125.3, 124.3, 123.7, 123.1, 121.7, 118.7, 113.7, 111.7, 109.7, 47.5, 42.7, 41.9, 37.2, 27.6, 25.4, 19.0; IR (neat): 2928, 2853, 1613, 1525, 1464, 1370, 1274, 1173, 1068, 982; HRESIMS Calcd for  $[\text{C}_{33}\text{H}_{30}\text{N}_2\text{NaO}_2\text{S}]^+$  ( $\text{M} + \text{Na}^+$ ) 541.1920, found 541.1904.

**(3b*S*,3c*S*,9a*R*)-7-methoxy-2-(methylsulfonyl)-3b-(4-(pyrrolidin-1-yl)phenyl)-3b,3c-dihydro-2*H*-benzo[*e*]naphtho[2',1':1,3]cyclopropa[1,2-*g*]isoindole (4o)**

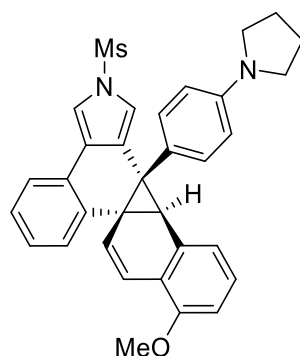

**4o**

Compound **4o** was prepared in 90% yield (72.2 mg) according to the general procedure. Pale yellow solid (mp 165–166 °C).  $[\alpha]_D^{25} = -507.6^\circ$  ( $c = 1.0$ ,  $\text{CHCl}_3$ ). 95% ee (determined by HPLC: Chiralpak IE Column, 15/85 *i*-PrOH/hexane, 1.0 mL/min, 254 nm; TR = 14.84 min (major), 18.18 min (minor)).  $^1\text{H NMR}$  (500 MHz,  $\text{CDCl}_3$ )  $\delta$  7.63 (dd,  $J = 7.5$ , 1.0 Hz, 1H), 7.45 (d,  $J = 2.0$  Hz, 1H), 7.34 (dd,  $J = 7.5$ , 1.0 Hz, 1H), 7.29 – 7.25 (m, 2H), 7.19 – 7.14 (m, 1H), 6.98 (d,  $J = 8.0$  Hz, 1H), 6.82 (dd,  $J = 8.5$ , 2.0 Hz, 1H), 6.78 (d,  $J = 10.0$  Hz, 1H), 6.64 (d,  $J = 8.0$  Hz, 1H), 6.60 (dd,  $J = 8.5$ , 2.0 Hz, 1H),

6.56 (d,  $J = 2.0$  Hz, 1H), 6.37 (dd,  $J = 8.5, 2.5$  Hz, 1H), 6.21 (d,  $J = 10.5$  Hz, 1H), 6.08 (dd,  $J = 8.4, 2.5$  Hz, 1H), 3.70 (s, 3H), 3.26 – 3.11 (m, 4H), 3.07 (s, 3H), 2.58 (s, 1H), 1.98 – 1.87 (m, 4H);  $^{13}\text{C}$  NMR (125 MHz,  $\text{CDCl}_3$ )  $\delta$  155.1, 146.1, 138.0, 133.3, 133.1, 131.3, 131.2, 129.9, 127.8, 127.4, 126.0, 125.3, 125.0, 124.2, 123.0, 121.7(2), 121.6(9), 120.7, 118.7, 113.7, 111.8, 109.8, 108.2, 55.5, 47.4, 42.6, 41.5, 37.2, 27.6, 25.4; IR (neat): 2962, 2853, 1613, 1525, 1469, 1367, 1263, 1171, 1022, 982; HRESIMS Calcd for  $[\text{C}_{33}\text{H}_{30}\text{N}_2\text{NaO}_3\text{S}]^+$  ( $\text{M} + \text{Na}^+$ ) 557.1869, found 557.1904.

**(3b*S*,3c*S*,9a*R*)-6-chloro-2-(methylsulfonyl)-3b-(4-(pyrrolidin-1-yl)phenyl)-3b,3c-dihydro-2*H*-benzo[*e*]naphtho[2',1':1,3]cyclopropa[1,2-*g*]isoindole (4p)**

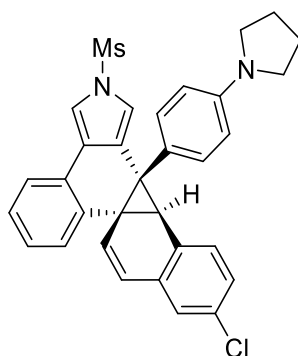

**4p**

Compound **4p** was prepared in 88% yield (71.2 mg) according to the general procedure. Pale yellow solid (mp 254–255 °C).  $[\alpha]_{\text{D}}^{25} = -556.5^\circ$  ( $c = 1.0$ ,  $\text{CHCl}_3$ ). 94% ee (determined by HPLC: Chiralpak IE Column, 20/80 *i*-PrOH/hexane, 1.0 mL/min, 254 nm; TR = 9.48 min (minor), 12.77 min (major)).  $^1\text{H}$  NMR (400 MHz,  $\text{CDCl}_3$ )  $\delta$  7.63 (d,  $J = 7.2$  Hz, 1H), 7.46 (d,  $J = 2.0$  Hz, 1H), 7.33 – 7.20 (m, 4H), 7.16 (dd,  $J = 8.0, 2.0$  Hz, 1H), 6.88 (d,  $J = 1.6$  Hz, 1H), 6.79 (dd,  $J = 8.4, 1.6$  Hz, 1H), 6.58 (d,  $J = 2.0$  Hz, 1H), 6.55 (dd,  $J = 8.4, 1.6$  Hz, 1H), 6.36 (dd,  $J = 8.4, 2.4$  Hz, 1H), 6.32 – 6.18 (m, 2H), 6.09 (dd,  $J = 8.4, 2.0$  Hz, 1H), 3.25 – 3.11 (m, 4H), 3.09 (s, 3H), 2.58 (s, 1H), 1.99 – 1.84 (m, 4H);  $^{13}\text{C}$  NMR (100 MHz,  $\text{CDCl}_3$ )  $\delta$  146.1, 137.5, 133.2, 132.8, 131.4(4), 131.3(7), 130.7, 130.5, 130.0, 129.8, 127.5(0), 127.4(7), 127.3, 126.9, 126.4, 126.3, 125.3, 123.5, 123.1, 121.5, 118.8, 113.8, 111.7, 109.8, 47.4, 42.7, 41.0, 37.4, 28.2, 25.4; IR (neat): 2962, 2851, 1613, 1519, 1480, 1367, 1260, 1172, 1043, 983; HRESIMS Calcd for  $[\text{C}_{32}\text{H}_{27}\text{ClN}_2\text{NaO}_2\text{S}]^+$  ( $\text{M} + \text{Na}^+$ ) 561.1374, found 561.1347.

**(3*bS*,3*cS*,9*aR*)-6-methoxy-2-(methylsulfonyl)-3*b*-(4-(pyrrolidin-1-yl)phenyl)-3*b*,3*c*-dihydro-2*H*-benzo[*e*]naphtho[2',1':1,3]cyclopropa[1,2-*g*]isoindole (4*q*)**

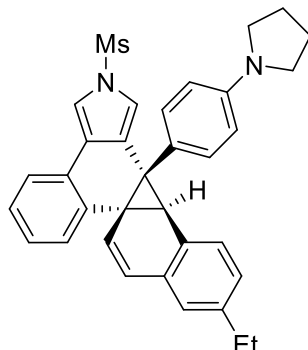

**4*q***

Compound **4*q*** was prepared in 82% yield (65.5 mg) according to the general procedure. Pale yellow solid (mp 192–193 °C).  $[\alpha]_D^{25} = -597.5^\circ$  ( $c = 1.0$ ,  $\text{CHCl}_3$ ). 96% ee (determined by HPLC: Chiralpak IE Column, 20/80 *i*-PrOH/hexane, 1.0 mL/min, 254 nm; TR = 8.64 min (minor), 11.73 min (major)).  $^1\text{H NMR}$  (400 MHz,  $\text{CDCl}_3$ )  $\delta$  7.68 – 7.57 (m, 1H), 7.45 (d,  $J = 2.4$  Hz, 1H), 7.33 – 7.24 (m, 3H), 7.24 – 7.20 (m, 1H), 7.07 (dd,  $J = 7.6, 1.6$  Hz, 1H), 6.87 – 6.81 (m, 1H), 6.76 (d,  $J = 1.2$  Hz, 1H), 6.62 – 6.49 (m, 2H), 6.42 – 6.35 (m, 1H), 6.33 (d,  $J = 10.0$  Hz, 1H), 6.20 (d,  $J = 10.0$  Hz, 1H), 6.12 – 6.02 (m, 1H), 3.24 – 3.11 (m, 4H), 3.09 (s, 3H), 2.62 – 2.48 (m, 3H), 2.00 – 1.83 (m, 4H), 1.19 (t,  $J = 7.6$  Hz, 3H);  $^{13}\text{C NMR}$  (100 MHz,  $\text{CDCl}_3$ )  $\delta$  146.0, 142.0, 138.1, 133.3, 131.5, 131.4, 131.2, 129.9, 129.3, 128.8, 127.5, 127.4, 127.2, 126.8, 126.0, 125.9, 125.3, 124.2, 123.0, 121.7, 118.7, 113.7, 111.6, 109.7, 47.4, 42.7, 41.2, 37.2, 28.4, 27.9, 25.4, 15.6; IR (neat): 2964, 2853, 1613, 1522, 1479, 1367, 1261, 1173, 1043, 982; HRESIMS Calcd for  $[\text{C}_{34}\text{H}_{32}\text{KN}_2\text{O}_2\text{S}]^+$  ( $\text{M} + \text{K}^+$ ) 571.1816, found 571.1798.

**(3*bS*,3*cS*,9*aR*)-6-ethyl-2-(methylsulfonyl)-3*b*-(4-(pyrrolidin-1-yl)phenyl)-3*b*,3*c*-dihydro-2*H*-benzo[*e*]naphtho[2',1':1,3]cyclopropa[1,2-*g*]isoindole (4*r*)**

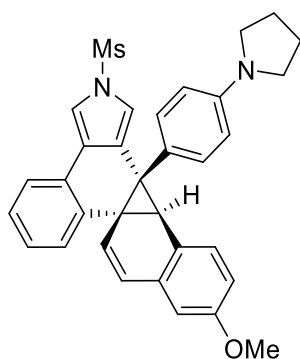

**4r**

Compound **4r** was prepared in 94% yield (80.2 mg) according to the general procedure. Pale yellow solid (mp 195–196 °C).  $[\alpha]_D^{25} = -479.0^\circ$  ( $c = 1.0$ ,  $\text{CHCl}_3$ ). 95% ee (determined by HPLC: Chiralpak IE Column, 20/80 *i*-PrOH/hexane, 1.0 mL/min, 254 nm; TR = 9.62 min (minor), 12.98 min (major)).  $^1\text{H}$  NMR (400 MHz,  $\text{CDCl}_3$ )  $\delta$  7.62 (d,  $J = 7.2$  Hz, 1H), 7.44 (d,  $J = 2.0$  Hz, 1H), 7.36 – 7.23 (m, 3H), 7.21 – 7.12 (m, 1H), 6.87 – 6.75 (m, 2H), 6.63 – 6.51 (m, 2H), 6.47 (d,  $J = 2.4$  Hz, 1H), 6.37 (d,  $J = 7.2$  Hz, 1H), 6.33 – 6.18 (m, 2H), 6.09 (d,  $J = 7.6$  Hz, 1H), 3.73 (s, 3H), 3.34 – 3.10 (m, 4H), 3.07 (s, 3H), 2.58 (s, 1H), 1.99 – 1.83 (m, 4H);  $^{13}\text{C}$  NMR (100 MHz,  $\text{CDCl}_3$ )  $\delta$  157.9, 146.0, 137.9, 133.3, 132.3, 131.5, 131.3, 129.8, 129.7, 127.3(8), 127.3(6), 126.7, 126.0, 125.2, 124.3, 123.1, 121.6, 118.6, 113.8, 113.7, 111.9, 111.7, 109.8, 55.2, 47.4, 42.6, 40.8, 37.1, 27.8, 25.3; IR (neat): 2964, 2853, 1613, 1522, 1479, 1367, 1261, 1173, 1043, 982; HRESIMS Calcd for  $[\text{C}_{33}\text{H}_{31}\text{N}_2\text{O}_3\text{S}]^+$  ( $\text{M} + \text{H}^+$ ) 535.2050, found 535.2061.

**(3b*S*,3c*S*,9a*R*)-5-bromo-2-(methylsulfonyl)-3b-(4-(pyrrolidin-1-yl)phenyl)-3b,3c-dihydro-2*H*-benzo[*e*]naphtho[2',1':1,3]cyclopropa[1,2-*g*]isoindole (4s)**

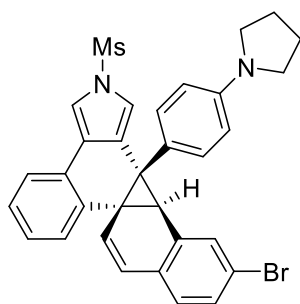

**4s**

Compound **4s** was prepared in 93% yield (81.4 mg) according to the general procedure. Pale yellow solid (mp 206–207 °C).  $[\alpha]_D^{25} = -738.8^\circ$  ( $c = 1.0$ ,  $\text{CHCl}_3$ ). 85% ee (determined by HPLC: Chiralpak IE Column, 10/90 *i*-PrOH/hexane, 1.0 mL/min, 254 nm; TR = 17.59 min (minor), 21.79 min (major)).  $^1\text{H}$  NMR (400 MHz,  $\text{CDCl}_3$ )  $\delta$  7.63 (d,  $J = 6.8$  Hz, 1H), 7.54 – 7.36 (m, 2H), 7.34 – 7.25 (m, 3H), 7.20 (dd,  $J = 8.0$ , 1.6 Hz, 1H), 6.89 – 6.67 (m, 2H), 6.66 – 6.48 (m, 2H), 6.36 (dd,  $J = 8.4$ , 1.6 Hz, 1H), 6.26 (dd,  $J = 19.2$ , 10.0 Hz, 2H), 6.17 – 6.02 (m, 1H), 3.30 – 3.13 (m, 4H), 3.10 (s, 3H), 2.56 (s, 1H), 2.04 – 1.80 (m, 4H);  $^{13}\text{C}$  NMR (100 MHz,  $\text{CDCl}_3$ )  $\delta$  146.1, 137.4, 134.3, 133.2, 131.4, 131.3, 130.6, 130.3, 129.8, 129.0, 128.6, 127.5, 126.6, 126.5, 126.3, 125.3, 123.5, 123.1, 121.4, 120.8, 118.9, 113.8, 111.7, 109.8, 47.4, 42.7, 41.1, 37.5, 28.3, 25.4; IR (neat): 2964, 2851, 1614, 1525, 1478, 1369, 1261, 1173, 1043, 982; HRESIMS Calcd for  $[\text{C}_{32}\text{H}_{27}\text{BrN}_2\text{NaO}_2\text{S}]^+$  ( $\text{M} + \text{Na}^+$ ) 605.0869, found 605.0856.

**(3b*S*,3c*S*,9a*R*)-5-methoxy-2-(methylsulfonyl)-3b-(4-(pyrrolidin-1-yl)phenyl)-3b,3c-dihydro-2*H*-benzo[*e*]naphtho[2',1':1,3]cyclopropa[1,2-*g*]isoindole (**4t**)**

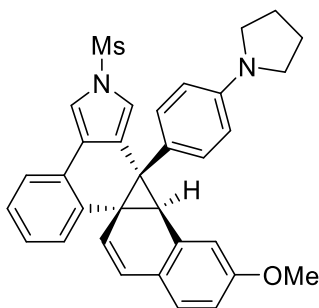

**4t**

Compound **4t** was prepared in 94% yield (75.4 mg) according to the general procedure. Pale yellow solid (mp 190–191 °C).  $[\alpha]_D^{25} = -689.3^\circ$  ( $c = 1.0$ ,  $\text{CHCl}_3$ ). 94% ee (determined by HPLC: Chiralpak IE Column, 30/70 *i*-PrOH/hexane, 1.0 mL/min, 254 nm; TR = 10.05 min (minor), 12.14 min (major)).  $^1\text{H}$  NMR (400 MHz,  $\text{CDCl}_3$ )  $\delta$  7.67 – 7.58 (m, 1H), 7.46 (d,  $J = 2.4$  Hz, 1H), 7.35 (dd,  $J = 7.6$ , 1.2 Hz, 1H), 7.29 – 7.23 (m, 2H), 6.91 (d,  $J = 2.4$  Hz, 1H), 6.83 (dd,  $J = 8.4$ , 3.6 Hz, 2H), 6.65 (dd,  $J = 8.4$ , 2.8 Hz, 1H), 6.62 (dd,  $J = 8.8$ , 2.4 Hz, 1H), 6.58 (d,  $J = 2.4$  Hz, 1H), 6.42 – 6.34 (m, 1H), 6.29 (d,  $J = 9.6$  Hz, 1H), 6.14 – 5.98 (m, 2H), 3.80 (s, 3H), 3.26 – 3.12 (m, 4H), 3.08 (s, 3H),

2.57 (s, 1H), 1.97 – 1.84 (m, 4H);  $^{13}\text{C}$  NMR (100 MHz,  $\text{CDCl}_3$ )  $\delta$  159.2, 146.0, 138.0, 133.6, 133.2, 131.3, 129.9, 128.4, 127.4, 126.7, 126.1, 125.3, 124.8, 124.1, 123.4, 123.1, 121.7, 118.6, 113.7, 112.1, 111.6, 109.7, 55.2, 47.4, 42.7, 41.7, 37.2, 28.2, 25.4; IR (neat): 2963, 2837, 1607, 1525, 1463, 1367, 1259, 1127, 1043, 982; HRESIMS Calcd for  $[\text{C}_{33}\text{H}_{30}\text{N}_2\text{NaO}_3\text{S}]^+$  ( $\text{M} + \text{Na}^+$ ) 557.1869, found 557.1891.

**(3bS,3cS,9aR)-2-(methylsulfonyl)-5-phenyl-3b-(4-(pyrrolidin-1-yl)phenyl)-3b,3c-dihydro-2H-benzo[*e*]naphtho[2',1':1,3]cyclopropa[1,2-*g*]isoindole (4u)**

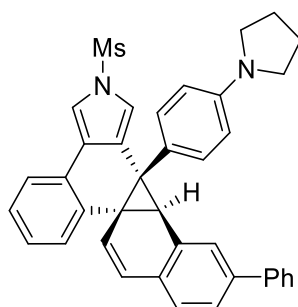

**4u**

Compound **4u** was prepared in 92% yield (80.1 mg) according to the general procedure. Pale yellow solid (mp 180–181 °C).  $[\alpha]_{\text{D}}^{25} = -941.6^\circ$  ( $c = 1.0$ ,  $\text{CHCl}_3$ ). 94% ee (determined by HPLC: Chiralpak IE Column, 15/85 *i*-PrOH/hexane, 1.0 mL/min, 254 nm; TR = 15.72 min (minor), 21.82 min (major)).  $^1\text{H}$  NMR (400 MHz,  $\text{CDCl}_3$ )  $\delta$  7.69 – 7.56 (m, 4H), 7.47 (d,  $J = 2.0$  Hz, 1H), 7.44 – 7.23 (m, 7H), 6.98 (d,  $J = 8.0$  Hz, 1H), 6.84 (d,  $J = 6.8$  Hz, 1H), 6.66 – 6.50 (m, 2H), 6.38 (d,  $J = 9.6$  Hz, 2H), 6.23 (d,  $J = 9.6$  Hz, 1H), 6.04 (d,  $J = 8.0$  Hz, 1H), 3.26 – 3.12 (m, 4H), 3.09 (s, 3H), 2.70 (s, 1H), 1.99 – 1.79 (m, 4H);  $^{13}\text{C}$  NMR (100 MHz,  $\text{CDCl}_3$ )  $\delta$  146.0, 140.7, 140.1, 137.8, 133.3, 132.6, 131.4, 131.1, 130.5, 129.9, 128.7, 127.7, 127.4(4), 127.3(6), 127.2, 127.0, 126.9, 126.2, 125.3, 124.8, 123.9, 123.1, 121.6, 118.7, 113.8, 111.7, 109.8, 47.4, 42.7, 41.7, 37.5, 28.3, 25.4; IR (neat): 2963, 2853, 1613, 1526, 1462, 1370, 1261, 1173, 1068, 982; HRESIMS Calcd for  $[\text{C}_{38}\text{H}_{32}\text{N}_2\text{NaO}_2\text{S}]^+$  ( $\text{M} + \text{Na}^+$ ) 603.2077, found 603.2054.

**(3bS,3cS,9aR)-4-methyl-2-(methylsulfonyl)-3b-(4-(pyrrolidin-1-yl)phenyl)-3b,3c-dihydro-2H-benzo[*e*]naphtho[2',1':1,3]cyclopropa[1,2-*g*]isoindole (4v)**

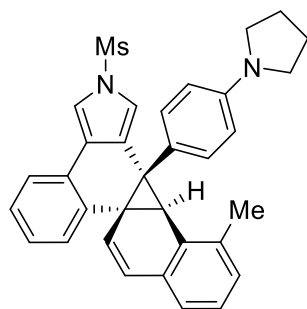

**4v**

Compound **4v** was prepared in 88% yield (68.5 mg) according to the general procedure. Pale yellow solid (mp 154–155 °C).  $[\alpha]_D^{25} = -577.4^\circ$  ( $c = 1.0$ ,  $\text{CHCl}_3$ ). 89% ee (determined by HPLC: Chiralpak IE Column, 30/70 *i*-PrOH/hexane, 1.0 mL/min, 254 nm; TR = 7.07 min (minor), 7.74 min (major)).  $^1\text{H}$  NMR (400 MHz,  $\text{CDCl}_3$ )  $\delta$  7.72 – 7.58 (m, 1H), 7.46 (d,  $J = 2.4$  Hz, 1H), 7.36 (d,  $J = 7.6$  Hz, 1H), 7.32 – 7.24 (m, 2H), 7.08 (d,  $J = 7.2$  Hz, 1H), 7.04 – 6.92 (m, 1H), 6.85 (d,  $J = 7.6$  Hz, 1H), 6.76 (d,  $J = 7.2$  Hz, 1H), 6.60 (d,  $J = 2.4$  Hz, 1H), 6.48 (d,  $J = 8.0$  Hz, 1H), 6.36 (d,  $J = 8.4$  Hz, 1H), 6.33 (d,  $J = 10.0$  Hz, 1H), 6.19 (d,  $J = 9.6$  Hz, 1H), 6.07 (d,  $J = 8.4$  Hz, 1H), 3.24 – 3.12 (m, 4H), 3.09 (s, 3H), 2.58 (s, 1H), 2.39 (s, 3H), 1.99 – 1.85 (m, 4H);  $^{13}\text{C}$  NMR (100 MHz,  $\text{CDCl}_3$ )  $\delta$  146.1, 138.4, 136.1, 133.2, 131.5, 131.2, 131.0, 130.8, 129.9, 129.1, 128.0, 127.4, 126.1, 125.7, 125.5(3), 125.4(9), 125.3, 124.2, 123.1, 121.8, 118.6, 113.8, 111.5, 109.8, 47.4, 42.6, 38.9, 37.1, 27.1, 25.4, 19.7; IR (neat): 2963, 2852, 1614, 1524, 1462, 1369, 1262, 1173, 1046, 982; HRESIMS Calcd for  $[\text{C}_{33}\text{H}_{30}\text{N}_2\text{NaO}_2\text{S}]^+$  ( $\text{M} + \text{Na}^+$ ) 541.1920, found 541.1903.

**(3b*S*,3c*S*,9a*R*)-4-methoxy-2-(methylsulfonyl)-3b-(4-(pyrrolidin-1-yl)phenyl)-3b,3c-dihydro-2*H*-benzo[*e*]naphtho[2',1':1,3]cyclopropa[1,2-*g*]isoindole (4w)**

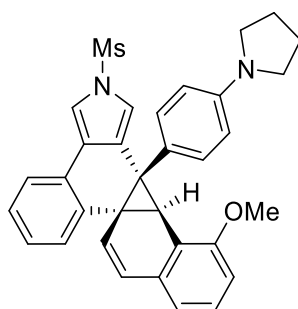

**4w**

Compound **4w** was prepared in 90% yield (72.2 mg) according to the general procedure. Pale yellow solid (mp 281–282 °C).  $[\alpha]_D^{25} = -508.5^\circ$  (c = 1.0, CHCl<sub>3</sub>). 95% ee (determined by HPLC: Chiralpak ADH Column, 30/70 *i*-PrOH/hexane, 1.0 mL/min, 254 nm; TR = 11.53 min (major), 19.18 min (minor)). <sup>1</sup>H NMR (400 MHz, CDCl<sub>3</sub>) δ 7.69 – 7.58 (m, 1H), 7.46 (d, *J* = 2.4 Hz, 1H), 7.38 – 7.26 (m, 2H), 7.24 – 7.19 (m, 1H), 7.10 – 7.03 (m, 1H), 6.84 (dd, *J* = 8.4, 1.6 Hz, 1H), 6.80 (d, *J* = 8.0 Hz, 1H), 6.64 – 6.47 (m, 3H), 6.38 (d, *J* = 7.6 Hz, 1H), 6.33 (d, *J* = 10.0 Hz, 1H), 6.23 (d, *J* = 10.0 Hz, 1H), 6.10 (d, *J* = 8.4 Hz, 1H), 3.84 (s, 3H), 3.26 – 3.13 (m, 4H), 3.10 (s, 3H), 2.89 (s, 1H), 1.97 – 1.87 (m, 4H); <sup>13</sup>C NMR (100 MHz, CDCl<sub>3</sub>) δ 157.6, 146.1, 138.4, 133.1, 132.4, 131.4, 129.9, 127.4, 127.3, 126.4(3), 126.3(7), 126.0, 125.4, 124.5, 123.0, 121.9, 120.7, 120.0, 118.8, 113.7, 111.5, 109.9, 109.3, 55.6, 47.4, 42.7, 36.7, 36.0, 27.1, 25.4; IR (neat): 2962, 2925, 1614, 1526, 1470, 1369, 1263, 1172, 1044, 982; HRESIMS Calcd for [C<sub>33</sub>H<sub>30</sub>N<sub>2</sub>NaO<sub>3</sub>S]<sup>+</sup> (M + Na<sup>+</sup>) 557.1869, found 557.1853.

***N,N*-dimethyl-4-((3*bS*,3*cS*,9*aR*)-2-(methylsulfonyl)-2*H*-benzo[*e*]naphtho[2',1':1,3]cyclopropa[1,2-*g*]isoindol-3*b*(3*cH*)-yl)aniline (4x)**

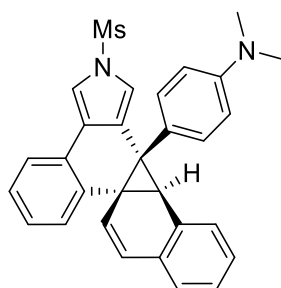

**4x**

Compound **4x** was prepared in 93% yield (66.8 mg) according to the general procedure. Pale yellow solid (mp 256–257 °C).  $[\alpha]_D^{25} = -594.3^\circ$  (c = 1.0, CHCl<sub>3</sub>). 95% ee (determined by HPLC: Chiralpak IC Column, 20/80 *i*-PrOH/hexane, 1.0 mL/min, 254 nm; TR = 9.48 min (major), 11.43 min (minor)). <sup>1</sup>H NMR (400 MHz, CDCl<sub>3</sub>) δ 7.71 (d, *J* = 7.2 Hz, 1H), 7.53 (d, *J* = 2.0 Hz, 1H), 7.45 – 7.37 (m, 2H), 7.37 – 7.29 (m, 3H), 7.20 – 7.13 (m, 1H), 6.97 (d, *J* = 7.6 Hz, 1H), 6.91 (d, *J* = 10.0 Hz, 1H), 6.70 – 6.50 (m, 3H), 6.40 (d, *J* = 10. Hz, 1H), 6.32 – 6.08 (m, 2H), 3.15 (s, 3H), 2.89 (s, 6H), 2.70 (s, 1H); <sup>13</sup>C NMR (100 MHz, CDCl<sub>3</sub>) δ 148.6, 137.8, 133.2, 132.0, 131.3, 131.0, 129.9,



128.9, 127.5, 127.4, 127.3, 126.1(2), 126.0(8), 125.9, 125.3, 125.1, 123.1, 121.6, 118.7, 113.8, 112.5, 110.5, 42.7, 41.4, 40.3, 37.2, 27.8; IR (neat): 2925, 2854, 1615, 1526, 1454, 1366, 1261, 1171, 1044, 983; HRESIMS Calcd for  $[C_{30}H_{26}KN_2O_2S]^+$  (M + K<sup>+</sup>) 517.1347, found 517.1355.

***N,N*-dibenzyl-4-((3*bS*,3*cS*,9*aR*)-2-(methylsulfonyl)-2*H*-benzo[*e*]naphtho[2',1':1,3]cyclopropa[1,2-*g*]isoindol-3*b*(3*cH*)-yl)aniline (4y)**

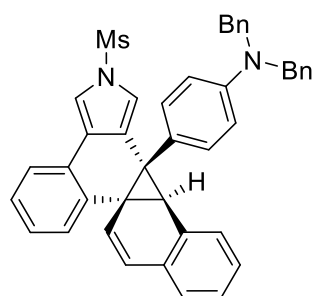

**4y**

Compound **4y** was prepared in 81% yield (76.6 mg) according to the general procedure. Pale yellow solid (mp 146–147 °C).  $[\alpha]_D^{25} = -400.7^\circ$  (c = 1.0, CHCl<sub>3</sub>). 90% ee (determined by HPLC: Chiralpak IA Column, 50/50 *i*-PrOH/hexane, 1.0 mL/min, 254 nm; TR = 8.98 min (major), 16.98 min (minor)). <sup>1</sup>H NMR (400 MHz, CDCl<sub>3</sub>) δ 7.61 (d, *J* = 7.2 Hz, 1H), 7.45 (d, *J* = 2.0 Hz, 1H), 7.35 – 7.19 (m, 10H), 7.18 – 7.11 (m, 5H), 7.10 – 7.03 (m, 1H), 6.90 (d, *J* = 7.4 Hz, 1H), 6.76 (d, *J* = 7.6 Hz, 1H), 6.63 (d, *J* = 2.0 Hz, 1H), 6.54 (d, *J* = 6.4 Hz, 1H), 6.49 (d, *J* = 8.4 Hz, 1H), 6.32 (d, *J* = 10.0 Hz, 1H), 6.27 – 6.21 (m, 1H), 6.18 (d, *J* = 10.0 Hz, 1H), 4.46 (s, 4H), 3.07 (s, 3H), 2.60 (s, 1H); <sup>13</sup>C NMR (100 MHz, CDCl<sub>3</sub>) δ 147.7, 138.6, 137.8, 133.4, 132.0, 131.4, 131.3, 130.8, 129.9, 128.9, 128.4, 127.5, 127.4, 127.2, 126.8, 126.7, 126.1(2), 126.0(8), 125.9, 125.4, 125.2, 123.1, 121.7, 118.8, 113.8, 112.8, 110.9, 53.9, 42.7, 41.4, 37.3, 27.8; IR (neat): 3027, 2927, 1612, 1563, 1454, 1366, 1261, 1171, 1044, 982; HRESIMS Calcd for  $[C_{42}H_{34}N_2NaO_2S]^+$  (M + Na<sup>+</sup>) 653.2233, found 653.2248.

**(3*b*S,3*c*S,9*a*R)-2-(methylsulfonyl)-3*b*-(4-(pyrrolidin-1-yl)phenyl)-3*b*,3*c*,10,11,12,13-hexahydro-2*H*-benzo[*e*]naphtho[2',1':1,3]cyclopropa[1,2-*g*]isoindole (4*z*)**

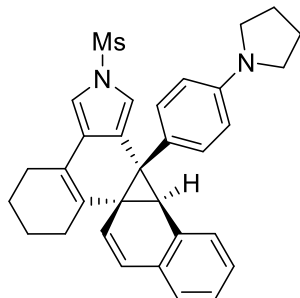

**4*z***

Compound **4z** was prepared in 90% yield (68.7 mg) according to the general procedure. Pale yellow solid (mp 276–277 °C).  $[\alpha]_D^{25} = -460.2^\circ$  (c = 1.0, CHCl<sub>3</sub>). 95% ee (determined by HPLC: Chiralpak IE Column, 20/80 *i*-PrOH/hexane, 1.0 mL/min, 254 nm; TR = 7.58 min (minor), 9.61 min (major)). <sup>1</sup>H NMR (400 MHz, CDCl<sub>3</sub>) δ 7.38 (d, *J* = 7.2 Hz, 1H), 7.27 – 7.18 (m, 1H), 7.15 – 7.01 (m, 1H), 6.94 (d, *J* = 2.4 Hz, 1H), 6.91 – 6.80 (m, 2H), 6.59 – 6.45 (m, 2H), 6.39 (dd, *J* = 8.4, 2.4 Hz, 1H), 6.20 (d, *J* = 10.0 Hz, 1H), 6.10 (d, *J* = 10.0 Hz, 1H), 6.06 (dd, *J* = 8.4, 2.4 Hz, 1H), 3.25 – 3.13 (m, 4H), 3.07 (s, 3H), 2.57 – 2.47 (m, 1H), 2.46 (s, 1H), 2.42 – 2.27 (m, 3H), 2.00 – 1.89 (m, 4H), 1.88 – 1.73 (m, 3H), 1.70 – 1.61 (m, 1H); <sup>13</sup>C NMR (125 MHz, CDCl<sub>3</sub>) δ 145.9, 135.5, 133.5, 133.0, 131.4, 131.1, 130.8, 128.6, 127.2, 127.1, 126.4, 125.8, 125.7, 124.6, 124.4, 118.7, 118.3, 112.2, 111.5, 109.6, 47.4, 42.4, 40.3, 39.2, 28.6, 28.5, 25.4, 25.2, 23.4, 22.3; IR (neat): 2926, 2854, 1613, 1520, 1461, 1367, 1263, 1170, 1063, 980; HRESIMS Calcd for [C<sub>32</sub>H<sub>32</sub>N<sub>2</sub>NaO<sub>2</sub>S]<sup>+</sup> (M + Na<sup>+</sup>) 531.2077, found 531.2079.

**2-(methylsulfonyl)-3*b*-(4-(pyrrolidin-1-yl)phenyl)-3*b*,3*c*-dihydro-2*H*-benzo[*e*]naphtho[1',2':1,3]cyclopropa[1,2-*g*]isoindole (4*aa*)**

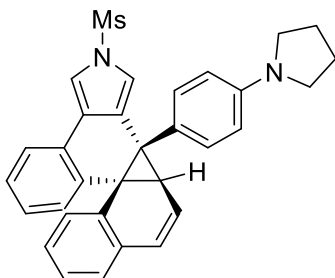

#### 4aa

Compound **4aa** was prepared in 78% yield (39.4 mg) according to the general procedure. Pale yellow solid (mp 233–234 °C).  $[\alpha]_D^{25} = 130.9^\circ$  ( $c = 1.0$ ,  $\text{CHCl}_3$ ). 64% ee (determined by HPLC: Chiralpak IE Column, 30/70 *i*-PrOH/hexane, 1.0 mL/min, 254 nm; TR = 6.71 min (major), 8.15 min (minor)).  $^1\text{H}$  NMR (500 MHz,  $\text{CDCl}_3$ )  $\delta$  7.63 (dd,  $J = 7.5, 1.0$  Hz, 1H), 7.48 – 7.41 (m, 2H), 7.35 – 7.28 (m, 1H), 7.23 – 7.18 (m, 1H), 7.18 – 6.09 (m, 3H), 7.05 – 6.98 (m, 1H), 6.81 (d,  $J = 7.5$  Hz, 1H), 6.55 (d,  $J = 2.5$  Hz, 1H), 6.39 – 6.29 (m, 2H), 6.25 – 6.18 (m, 1H), 6.14 (d,  $J = 9.5$  Hz, 1H), 6.03 (d,  $J = 7.5$  Hz, 1H), 3.20 – 3.12 (m, 4H), 3.07 (s, 3H), 1.97 (d,  $J = 5.5$  Hz, 1H), 1.95 – 1.83 (m, 4H);  $^{13}\text{C}$  NMR (125 MHz,  $\text{CDCl}_3$ )  $\delta$  146.0, 138.5, 133.6, 133.5, 132.7, 132.1, 131.2(2), 131.1(8), 130.9, 127.0, 126.6(9), 126.6(7), 126.0, 125.9(4), 125.9(0), 124.2, 123.3, 123.1, 121.8, 118.7, 113.6, 111.3, 109.8, 47.4, 42.7, 39.3, 38.0, 28.2, 25.4; IR (neat): 2963, 2854, 1612, 1521, 1487, 1367, 1263, 1128, 1058, 982; HRESIMS Calcd for  $[\text{C}_{32}\text{H}_{28}\text{KN}_2\text{O}_2\text{S}]^+$  ( $\text{M} + \text{Na}^+$ ) 543.1503, found 543.1502.

#### (3b*S*,3c*S*,9a*R*)-3b-(4-methoxyphenyl)-2-(methylsulfonyl)-3b,3c-dihydro-2*H*-benzo[*e*]naphtho[2',1':1,3]cyclopropa[1,2-*g*]isoindole (**4ab**)

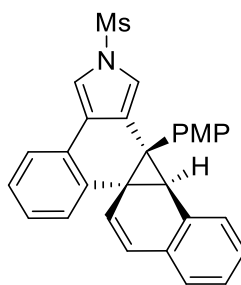

**4ab**

Compound **4ab** was prepared in 49% yield (39.4 mg) according to the general procedure. Pale yellow solid (mp 94–95 °C).  $[\alpha]_D^{25} = -379.4^\circ$  ( $c = 1.0$ ,  $\text{CHCl}_3$ ). 66% ee (determined by HPLC: Chiralpak IB Column, 40/60 *i*-PrOH/hexane, 1.0 mL/min, 254 nm; TR = (6.10 min (major), 7.57 min (minor)).  $^1\text{H}$  NMR (400 MHz,  $\text{CDCl}_3$ )  $\delta$  7.64 (d,  $J = 7.2$  Hz, 1H), 7.48 (d,  $J = 1.6$  Hz, 1H), 7.40 – 7.20 (m, 5H), 7.14 – 7.07 (m, 1H), 7.02 – 6.86 (m, 2H), 6.74 – 6.61 (m, 2H), 6.54 (d,  $J = 1.6$  Hz, 1H), 6.45 – 6.38 (m, 1H), 6.32 (d,  $J = 10.0$  Hz, 1H), 6.22 (d,  $J = 9.6$  Hz, 1H), 3.67 (s, 3H), 3.10 (s, 3H), 2.66 (s,

1H); <sup>13</sup>C NMR (100 MHz, CDCl<sub>3</sub>) δ 157.7, 137.5, 133.8, 131.7(4), 131.6(6), 131.2, 130.4, 129.9, 129.3, 128.9, 127.7, 127.5, 127.3, 126.3, 125.8, 125.2, 123.1, 121.6, 118.7, 114.1, 113.9, 111.6, 54.9, 42.7, 41.3, 37.2, 27.8; IR (neat): 3132, 2926, 1609, 1514, 1463, 1361, 1246, 1175, 1044, 983; HRESIMS Calcd for [C<sub>29</sub>H<sub>23</sub>NNaO<sub>3</sub>S]<sup>+</sup> (M + Na<sup>+</sup>) 488.1291, found 488.1293.

**(S)-14a-(4-methoxyphenyl)-2-(methylsulfonyl)-2,14a-dihydrobenzo[*e*]benzo[4,5]cyclohepta[1,2-*g*]isoindole (4ab')**

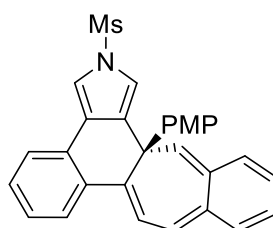

**4ab'**

Compound **4ab'** was prepared in 46% yield (21.4 mg) according to the general procedure except at 30 °C in DCM for 24 h. Pale yellow solid (mp 131–132 °C). [ $\alpha$ ]<sub>D</sub><sup>25</sup> = 182.6° (c = 1.0, CHCl<sub>3</sub>). 95% ee (determined by HPLC: Chiralpak IG Column, 40/60 *i*-PrOH/hexane, 1.0 mL/min, 254 nm; TR = 11.72 min (minor), 14.75 min (major)). <sup>1</sup>H NMR (400 MHz, CDCl<sub>3</sub>) δ 7.76 – 7.70 (m, 1H), 7.52 – 7.46 (m, 1H), 7.43 (d, *J* = 2.0 Hz, 1H), 7.26 – 7.18 (m, 5H), 7.17 – 7.10 (m, 2H), 7.07 – 6.98 (m, 3H), 6.54 (d, *J* = 11.6 Hz, 1H), 6.51 (d, *J* = 9.2 Hz, 2H), 6.01 (d, *J* = 11.6 Hz, 1H), 3.61 (s, 3H), 3.16 (s, 3H); <sup>13</sup>C NMR (100 MHz, CDCl<sub>3</sub>) δ 157.5, 139.9, 139.1, 135.5, 135.2, 135.0, 134.4, 133.4, 132.1, 130.3, 128.4, 128.0, 127.8, 127.6(1), 127.5(9), 127.3, 127.0, 126.5, 123.6, 123.1, 117.7, 113.6, 112.9, 55.0, 48.8, 42.8; IR (neat): 2929, 2854, 1737, 1668, 1559, 1464, 1363, 1243, 1182, 984; HRESIMS Calcd for [C<sub>29</sub>H<sub>23</sub>NNaO<sub>3</sub>S]<sup>+</sup> (M + Na<sup>+</sup>) 488.1291, found 488.1294.

***N,N*-dimethyl-4-((6*bS*,12*bR*,12*cR*)-2-(methylsulfonyl)-2*H*-naphtho[2',1':2,3]cyclopropa[1,2-*e*]thieno[2,3-*g*]isoindol-12*c*(12*bH*)-yl)aniline (4ac)**

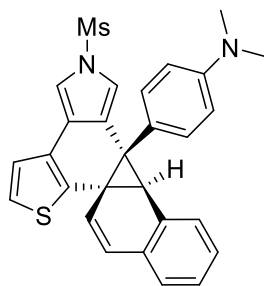

**4ac**

Compound **4ac** was prepared in 99% yield (48.0 mg) according to the general procedure. Pale yellow solid (mp 251–252 °C).  $[\alpha]_D^{25} = -397.2^\circ$  ( $c = 1.0$ ,  $\text{CHCl}_3$ ). 74% ee (determined by HPLC: Chiralpak IC Column, 30/70 *i*-PrOH/hexane, 1.0 mL/min, 254 nm; TR = 8.64 min (major), 10.67 min (minor)).  $^1\text{H}$  NMR (400 MHz,  $\text{CDCl}_3$ )  $\delta$  7.38 (d,  $J = 7.2$  Hz, 1H), 7.27 (d,  $J = 5.2$  Hz, 1H), 7.25 – 7.19 (m, 3H), 7.16 – 7.05 (m, 1H), 6.91 (d,  $J = 7.2$  Hz, 1H), 6.85 (d,  $J = 8.4$  Hz, 1H), 6.59 (d,  $J = 2.0$  Hz, 1H), 6.59 – 6.48 (m, 2H), 6.31 (d,  $J = 10.0$  Hz, 1H), 6.26 – 6.17 (m, 2H), 3.09 (s, 3H), 2.83 (s, 6H), 2.67 (s, 1H);  $^{13}\text{C}$  NMR (100 MHz,  $\text{CDCl}_3$ )  $\delta$  148.7, 142.2, 133.3, 132.2, 131.4, 131.1, 130.7, 128.8, 128.3, 127.7, 127.6, 126.2, 124.7, 124.6, 124.4, 124.3, 122.9, 119.9, 119.3, 112.4, 112.3, 110.6, 42.6, 41.3, 40.3, 36.7, 29.4; IR (neat): 2925, 1613, 1523, 1486, 1365, 1264, 1171, 1056, 980, 945; HRESIMS Calcd for  $[\text{C}_{28}\text{H}_{24}\text{KN}_2\text{O}_2\text{S}_2]^+$  ( $\text{M} + \text{K}^+$ ) 523.0911, found 523.0905.

***N,N*-dimethyl-4-((6*bS*,12*bS*,12*cS*)-2-(methanesulfonyl)-2*H*-naphtho[2',1':2,3]cyclopropa[1,2-*e*]thieno[3,4-*g*]isoindol-12*c*(12*bH*)-yl)aniline (4ad)**

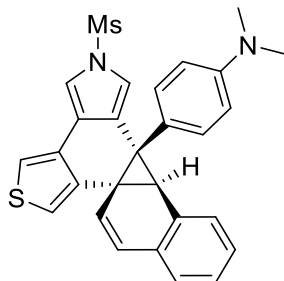

**4ad**

Compound **4ad** was prepared in 96% yield (46.5 mg) according to the general procedure. Pale yellow solid (mp 271–272 °C).  $[\alpha]_D^{25} = -602.2^\circ$  ( $c = 1.0$ ,  $\text{CHCl}_3$ ). 93%

ee (determined by HPLC: Chiralpak ADH Column, 50/50 *i*-PrOH/hexane, 1.0 mL/min, 254 nm; TR = 10.86 min (major), 17.04 min (minor)). <sup>1</sup>H NMR (500 MHz, CDCl<sub>3</sub>) δ 7.38 – 7.33 (m, 3H), 7.25 – 7.15 (m, 1H), 7.15 – 7.07 (m, 1H), 7.05 (d, *J* = 3.0 Hz, 1H), 6.89 (d, *J* = 7.0 Hz, 1H), 6.84 (d, *J* = 7.0 Hz, 1H), 6.57 (d, *J* = 2.0 Hz, 1H), 6.56 – 6.47 (m, 2H), 6.31 (d, *J* = 9.5 Hz, 1H), 6.23 (d, *J* = 9.5 Hz, 1H), 6.22 – 6.19 (m, 1H), 3.07 (s, 3H), 2.82 (s, 6H), 2.67 (s, 1H); <sup>13</sup>C NMR (125 MHz, CDCl<sub>3</sub>) δ 148.6, 141.1, 133.2, 132.0, 131.6, 131.5, 131.4, 128.9, 127.8, 127.6, 127.5, 127.4, 126.2, 125.1, 124.6, 121.7, 119.0, 118.9, 116.9, 113.4, 112.4, 110.7, 42.6, 42.5, 40.3, 36.5, 27.5; IR (neat): 2926, 1613, 1523, 1412, 1365, 1264, 1170, 1140, 1062, 981; HRESIMS Calcd for [C<sub>28</sub>H<sub>24</sub>KN<sub>2</sub>O<sub>2</sub>S<sub>2</sub>]<sup>+</sup> (M + K<sup>+</sup>) 523.0911, found 523.0908.

***N,N*-dimethyl-4-((5a*R*,11b*S*,11c*S*)-2-(methylsulfonyl)-4,5-dihydro-2*H*-naphtho[2',1':2,3]cyclopropa[1,2-*e*]isoindol-11c(11b*H*)-yl)aniline (4ae)**

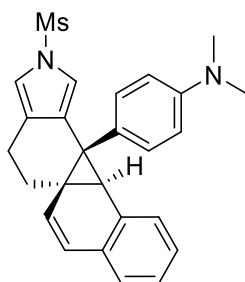

**4ae**

Compound **4ae** was prepared in 90% yield (38.8 mg) according to the general procedure except by employing **L26** as chiral ligand in toluene for 20 h. Pale yellow solid (mp 244–245 °C). [ $\alpha$ ]<sub>D</sub><sup>25</sup> = -166.8° (c = 1.0, CHCl<sub>3</sub>). 42% ee (determined by HPLC: Chiralpak IA Column, 10/90 *i*-PrOH/hexane, 1.0 mL/min, 254 nm; TR = 7.49 min (minor), 9.62 min (major)). <sup>1</sup>H NMR (400 MHz, CDCl<sub>3</sub>) δ 7.38 (d, *J* = 7.6 Hz, 1H), 7.21 – 7.11 (m, 1H), 7.10 – 6.96 (m, 1H), 6.94 – 6.69 (m, 3H), 6.67 – 6.27 (s, 2H), 6.25 (s, 2H), 6.12 (d, *J* = 10.0 Hz, 1H), 5.95 (d, *J* = 9.6 Hz, 1H), 3.04 (s, 1H), 2.99 (s, 3H), 2.82 (s, 6H), 2.73 – 2.63 (m, 1H), 2.54 – 2.41 (m, 1H), 2.35 – 2.22 (m, 2H); <sup>13</sup>C NMR (100 MHz, CDCl<sub>3</sub>) δ 148.5, 133.6, 132.6, 132.3, 129.0, 128.8, 127.1, 127.0, 126.2, 125.9, 124.6, 121.9, 117.6, 115.6, 42.4, 40.4, 35.7, 34.9, 27.2, 24.0, 17.7; IR (neat):

2919, 1613, 1526, 1488, 1455, 1361, 1262, 1166, 1063, 983; HRESIMS Calcd for  $[\text{C}_{26}\text{H}_{26}\text{N}_2\text{NaO}_2\text{S}]^+$  ( $\text{M} + \text{Na}^+$ ) 453.1607, found 453.1611.

**(3b*S*,7a*R*,7b*S*,8a*R*)-3b-(4-methoxyphenyl)-2-(methylsulfonyl)-2,3b,3c,7b,8,8a-hexahydrobenzo[2,3]cyclopropa[1,2-*e*]cyclopropa[*g*]isoindole (4aj)**

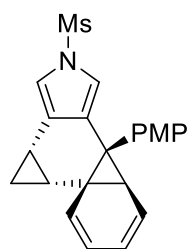

**4aj**

Compound **4aj** was prepared in 38% yield (14.4 mg) according to the general procedure except in DCM at 30 °C for 32 h. Pale solid (mp 152–153 °C).  $[\alpha]_{\text{D}}^{25} = -7.4^\circ$  ( $c = 1.0$ ,  $\text{CHCl}_3$ ). 20% ee (determined by HPLC: Chiralpak IA Column, 10/90 *i*-PrOH/hexane, 1.0 mL/min, 254 nm; TR = 8.29 min (minor), 8.84 min (major)).  $^1\text{H}$  NMR (400 MHz,  $\text{CDCl}_3$ )  $\delta$  6.99 (d,  $J = 8.4$  Hz, 2H), 6.91 (d,  $J = 2.4$  Hz, 1H), 6.65 (d,  $J = 8.4$  Hz, 2H), 6.61 (d,  $J = 2.4$  Hz, 1H), 6.34 (d,  $J = 8.0$  Hz, 1H), 6.26 – 6.20 (m, 1H), 6.00– 5.93 (m, 1H), 5.93 – 5.86 (m, 1H), 3.73 (s, 3H), 3.65 (d,  $J = 7.2$  Hz, 1H), 3.04 (s, 3H), 2.10 (td,  $J = 8.4, 5.6$  Hz, 1H), 2.02 (td,  $J = 8.0, 4.8$  Hz, 1H), 1.38 (td,  $J = 8.4, 4.4$  Hz, 1H), 0.82 (dd,  $J = 9.6, 4.8$  Hz, 1H);  $^{13}\text{C}$  NMR (100 MHz,  $\text{CDCl}_3$ )  $\delta$  157.5, 132.8, 131.3, 130.7, 126.8, 126.2, 124.9, 124.8, 123.6, 118.6, 115.7, 112.5, 80.6, 79.9, 55.0, 42.5, 31.9, 20.8, 18.0, 9.8; IR (neat): 2926, 2853, 1607, 1510, 1411, 1362, 1245, 1169, 1067, 983; HRESIMS Calcd for  $[\text{C}_{22}\text{H}_{21}\text{NNaO}_3\text{S}]^+$  ( $\text{M} + \text{Na}^+$ ) 402.1134, found 402.1135.

## 5. Synthetic Utility Study

### *N,N*-dimethyl-4-((7*bR*,12*aR*)-2-(methylsulfonyl)-7*b*,8,9,10,11,12-hexahydrobenzo[*e*]cyclohepta[*g*]isoindol-12*a*(2*H*)-yl)aniline (**5a**)

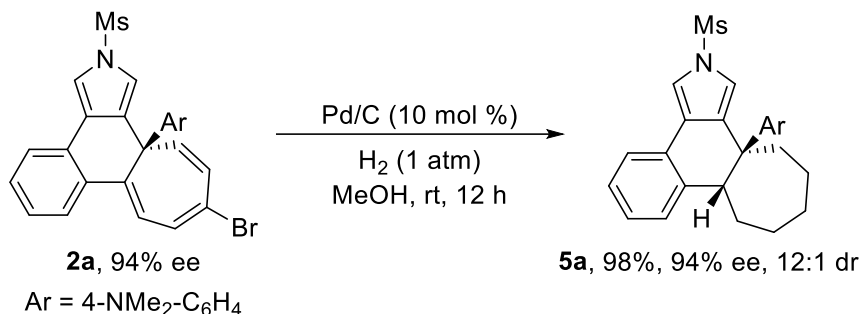

Compound **5a** was prepared according to the known procedure (0.25 mmol scale)<sup>2</sup> in 98% yield (106.5 mg) as a colourless solid (mp 241–243 °C).  $[\alpha]_D^{25} = +21.6^\circ$  ( $c = 1.0$ , CHCl<sub>3</sub>). 94% ee (determined by HPLC: Chiralpak IE Column, 20/80 *i*-PrOH/hexane, 1.0 mL/min, 254 nm; TR = 12.00 min (major), 14.12 min (minor)). <sup>1</sup>H NMR (400 MHz, CDCl<sub>3</sub>)  $\delta$  7.50 (d,  $J = 7.6$  Hz, 1H), 7.35 – 7.29 (m, 2H), 7.24 – 7.19 (m, 1H), 7.16 – 7.08 (m, 2H), 6.93 (d,  $J = 8.8$  Hz, 2H), 6.40 (d,  $J = 8.8$  Hz, 2H), 3.20 – 3.17 (s, 1H), 3.16 (s, 3H), 2.78 (s, 6H), 2.70 – 2.58 (m, 1H), 2.43 – 2.33 (m, 1H), 2.28 – 2.15 (m, 2H), 2.10 – 2.01 (m, 1H), 1.86 – 1.79 (m, 1H), 1.69 – 1.63 (m, 2H), 1.52 – 1.41 (m, 2H); <sup>13</sup>C NMR (100 MHz, CDCl<sub>3</sub>)  $\delta$  148.0, 140.4, 137.1, 132.1, 129.7, 128.6, 127.2, 126.2, 125.7, 125.0, 123.5, 114.7, 114.0, 111.8, 49.6, 45.3, 42.6, 40.4, 39.3, 28.5, 28.4, 26.0, 22.5; IR (neat): 3021, 2926, 1730, 1610, 1520, 1456, 1372, 1265, 1180, 1082; HRESIMS Calcd for [C<sub>26</sub>H<sub>30</sub>N<sub>2</sub>NaO<sub>2</sub>S]<sup>+</sup> (M + Na<sup>+</sup>) 457.1920, found 457.1919.

### *N,N*-dimethyl-4-((3*aR*,7*bR*,12*aS*,12*bS*)-2-(methylsulfonyl)-2,3,3*a*,7*b*,8,9,10,11,12,12*b*-decahydrobenzo[*e*]cyclohepta[*g*]isoindol-12*a*(1*H*)-yl)aniline (**5b**)



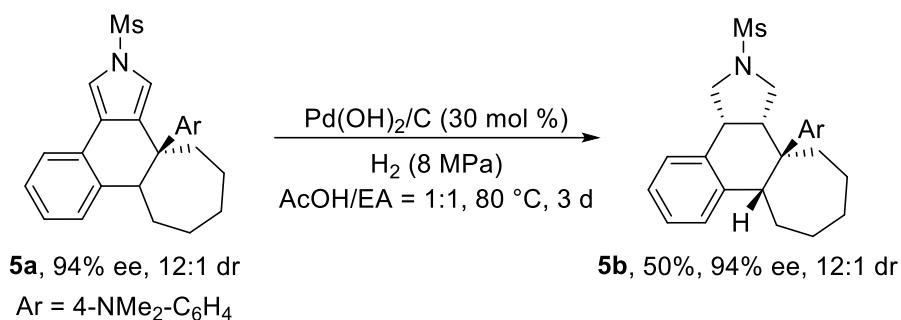

Compound **5b** was prepared according to the known procedure (0.15 mmol scale)<sup>2</sup> in 50% yield (32.7 mg) as a white solid (mp 158–159 °C).  $[\alpha]_D^{25} = 3.4^\circ$  ( $c = 1.0$ , CHCl<sub>3</sub>). 94% ee (determined by HPLC: Chiralpak IE Column, 20/80 *i*-PrOH/hexane, 1.0 mL/min, 254 nm; TR = 34.56 min (major), 38.58 min (minor)). <sup>1</sup>H NMR (400 MHz, CDCl<sub>3</sub>)  $\delta$  7.56 (d,  $J = 8.0$  Hz, 1H), 7.32 – 7.27 (m, 1H), 7.23 – 7.17 (m, 1H), 7.11 (d,  $J = 7.6$  Hz, 1H), 6.90 (d,  $J = 9.2$  Hz, 2H), 6.48 (d,  $J = 8.4$  Hz, 2H), 3.67 – 3.59 (m, 2H), 3.57 – 3.51 (m, 1H), 3.46 – 3.41 (m, 1H), 3.08 – 3.00 (m, 1H), 2.83 (s, 6H), 2.74 – 2.64 (m, 2H), 2.56 – 2.46 (m, 1H), 2.47 – 2.38 (m, 1H), 2.36 (s, 3H), 1.87 – 1.48 (m, 8H); <sup>13</sup>C NMR (100 MHz, CDCl<sub>3</sub>)  $\delta$  142.2, 134.4, 130.4, 127.8, 127.2, 125.7, 125.1, 111.9, 51.8, 49.9, 49.8, 47.6, 44.6, 43.0, 41.6, 40.4, 35.6, 29.4, 27.1, 26.6, 23.9; IR (neat): 2931, 2857, 1612, 1521, 1446, 1336, 1262, 1148, 1073, 950; HRESIMS Calcd for [C<sub>26</sub>H<sub>34</sub>N<sub>2</sub>NaO<sub>2</sub>]<sup>+</sup> (M + Na<sup>+</sup>) 461.2233, found 461.2269.

**(S)-12a-(4-methoxyphenyl)-2-(methylsulfonyl)-10-(phenylethynyl)-2,12a-dihydrobenzo[*e*]cyclohepta[*g*]isoindole (**5c**)**

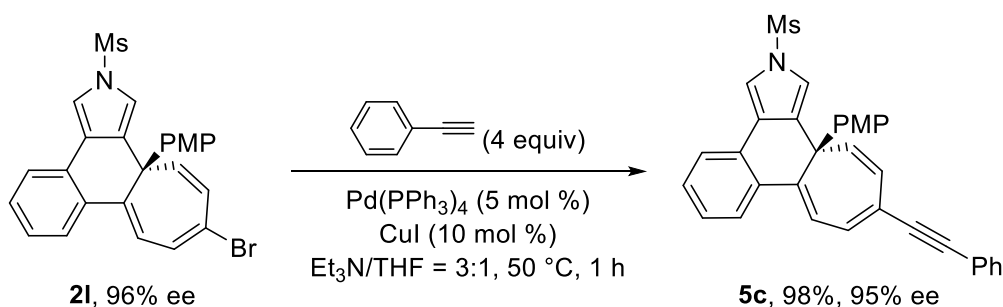

To an oven-dried 10 mL vial with a stir bar were added **2I** (0.15 mmol, 74.2 mg), THF (3 mL) and Et<sub>3</sub>N (1 mL). Then phenylacetylene (0.6 mmol, 66  $\mu$ L), Pd(PPh<sub>3</sub>)<sub>4</sub> (0.0075 mmol, 8.6 mg) and CuI (0.015 mmol, 5.7 mg) were added sequentially and stirred at 50 °C for 1 h. Upon completion, the mixture was filtered, extracted with ethyl acetate

for three times, dried over  $\text{MgSO}_4$  and concentrated. The residue was purified by chromatography on silica gel (eluent: PE/EtOAc) to afford **5c** in 98% yield (75.8 mg) as a pale yellow solid (mp 118–119 °C).  $[\alpha]_{\text{D}}^{25} = -233.9^\circ$  ( $c = 1.0$ ,  $\text{CHCl}_3$ ). 95% ee (determined by HPLC: Chiralpak IE Column, 30/70 *i*-PrOH/hexane, 1.0 mL/min, 254 nm; TR = 8.15 min (minor), 11.22 min (major)).  $^1\text{H}$  NMR (400 MHz,  $\text{CDCl}_3$ )  $\delta$  7.68 – 7.56 (m, 2H), 7.46 – 7.40 (m, 3H), 7.35 – 7.25 (m, 5H), 7.02 (d,  $J = 8.8$  Hz, 2H), 6.97 (d,  $J = 8.4$  Hz, 1H), 6.70 (d,  $J = 2.0$  Hz, 1H), 6.65 – 6.58 (m, 3H), 6.55 (d,  $J = 8.0$  Hz, 1H), 4.64 (d,  $J = 8.4$  Hz, 1H), 3.70 (s, 3H), 3.09 (s, 3H);  $^{13}\text{C}$  NMR (100 MHz,  $\text{CDCl}_3$ )  $\delta$  157.6, 135.3, 132.6(3), 132.5(8), 132.5, 131.5, 128.7, 128.2, 128.1, 128.0(3), 127.9(5), 127.9, 127.7, 126.9, 123.4, 122.3, 121.7, 119.0, 113.3, 112.7, 104.7, 101.8, 90.6, 90.1, 55.0, 42.8, 41.5; IR (neat): 3131, 2931, 1607, 1506, 1488, 1471, 1373, 1243, 1167, 1071, 981; HRESIMS Calcd for  $[\text{C}_{33}\text{H}_{25}\text{NNaO}_3\text{S}]^+$  ( $\text{M} + \text{Na}^+$ ) 538.1447, found 538.1485.

**(S)-12a-(4-methoxyphenyl)-2-(methylsulfonyl)-10-phenyl-2,12a-dihydrobenzo[*e*]cyclohepta[*g*]isoindole (5d)**

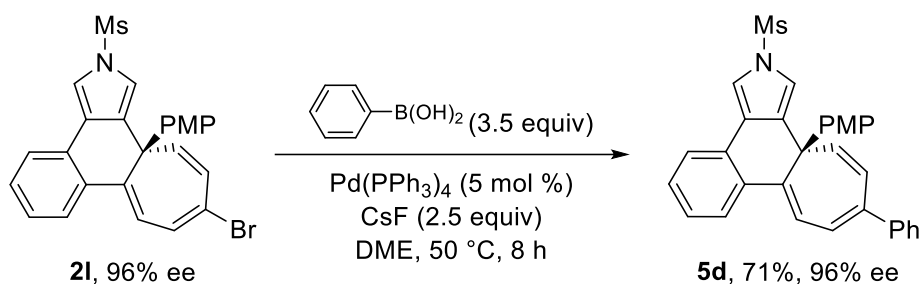

To an oven-dried 10-mL Schlenk tube with a stir bar were added **2l** (0.15 mmol, 74.2 mg) and DME (3 mL). Then  $\text{PhB(OH)}_2$  (0.53 mmol, 64.0 mg),  $\text{Pd(PPh}_3)_4$  (0.0075 mmol, 8.7 mg) and CsF (0.38 mmol, 57.0 mg) were added sequentially and stirred at 50 °C for 8 h. Upon completion, the mixture was filtered, extracted with ethyl acetate for three times, dried over  $\text{MgSO}_4$  and concentrated. The residue was purified by chromatography on silica gel (eluent: PE/EtOAc) to obtain **5d** in 71% yield (51.2 mg) as a pale yellow solid (mp 234–235 °C).  $[\alpha]_{\text{D}}^{25} = -152.8^\circ$  ( $c = 1.0$ ,  $\text{CHCl}_3$ ). 96% ee (determined by HPLC: Chiralpak IE Column, 40/60 *i*-PrOH/hexane, 1.0 mL/min, 254 nm; TR = 6.82 min (minor), 9.58 min (major)).  $^1\text{H}$  NMR (400 MHz,  $\text{CDCl}_3$ )  $\delta$  7.64 (d,

$J = 20.4$  Hz, 2H), 7.42 (s, 1H), 7.36 – 7.23 (m, 7H), 7.14 – 6.91 (m, 3H), 6.73 (s, 1H), 6.66 – 6.22 (m, 4H), 4.66 (d,  $J = 8.4$  Hz, 1H), 3.65 (s, 3H), 3.09 (s, 3H);  $^{13}\text{C}$  NMR (100 MHz,  $\text{CDCl}_3$ )  $\delta$  157.5, 141.3, 139.7, 135.5, 133.0, 132.7, 128.8, 128.4, 128.0, 127.7, 127.6, 127.5, 127.1, 126.7, 126.5, 124.4, 123.4, 122.9, 121.9, 118.9, 113.3, 112.5, 101.2, 99.8, 55.0, 42.8, 40.6; IR (neat): 3023, 2923, 1606, 1579, 1470, 1367, 1244, 1174, 1055, 949; HRESIMS Calcd for  $[\text{C}_{31}\text{H}_{25}\text{NNaO}_3\text{S}]^+$  ( $\text{M} + \text{Na}^+$ ) 514.1447, found 514.1469.

***tert*-butyl (3b*S*,3c*S*,9a*R*)-3b-(4-(pyrrolidin-1-yl)phenyl)-3b,3c-dihydro-2*H*-benzo[*e*]naphtho[2',1':1,3]cyclopropa[1,2-*g*]isoindole-2-carboxylate (5e)**

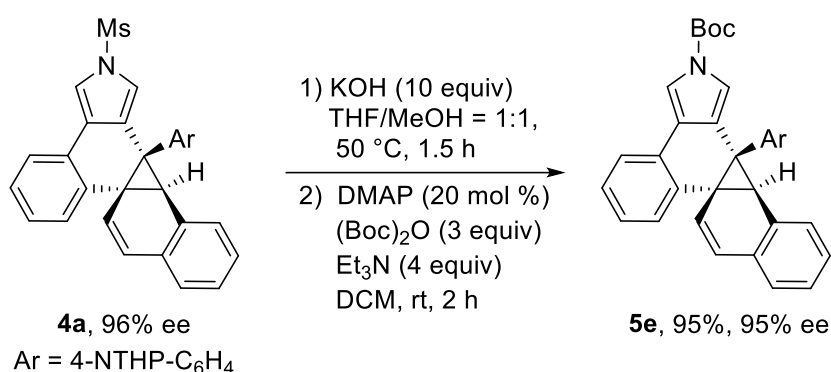

Compound **5e** was prepared according to the known procedure (0.15 mmol scale)<sup>3,4</sup> in 95% yield (75.1 mg) as a pale yellow solid (mp 156–157 °C).  $[\alpha]_{\text{D}}^{25} = -399.3^\circ$  ( $c = 1.0$ ,  $\text{CHCl}_3$ ). 95% ee (determined by HPLC: Chiralpak IB Column, 20/80 *i*-PrOH/hexane, 1.0 mL/min, 254 nm; TR = 6.89 min (minor), 8.65 min (major)).  $^1\text{H}$  NMR (600 MHz,  $\text{CDCl}_3$ )  $\delta$  7.67 (d,  $J = 7.2$  Hz, 1H), 7.58 (s, 1H), 7.37 – 7.28 (m, 2H), 7.27 – 7.15 (m, 3H), 7.13 – 7.05 (m, 1H), 6.91 (d,  $J = 7.2$  Hz, 1H), 6.85 (d,  $J = 7.8$  Hz, 1H), 6.71 (s, 1H), 6.56 (d,  $J = 7.8$  Hz, 1H), 6.39 (d,  $J = 7.2$  Hz, 1H), 6.34 (d,  $J = 9.6$  Hz, 1H), 6.23 (d,  $J = 9.6$  Hz, 1H), 6.07 (d,  $J = 8.4$  Hz, 1H), 3.23 – 3.04 (m, 4H), 2.63 (s, 1H), 2.01 – 1.82 (m, 4H), 1.56 (s, 9H);  $^{13}\text{C}$  NMR (150 MHz,  $\text{CDCl}_3$ )  $\delta$  148.8, 146.0, 137.8, 133.3, 132.4, 131.4(3), 131.4(0), 129.9, 129.2, 128.9, 127.3, 127.2, 127.1, 126.8, 126.4, 126.3, 126.0, 125.9, 124.6, 122.9, 120.0, 118.3, 113.3, 111.6, 109.7, 83.7, 47.4, 41.7, 37.3, 28.0, 27.9, 25.4; IR (neat): 2975, 2931, 1808, 1738, 1614, 1521, 1479, 1394, 1274, 1157; HRESIMS Calcd for  $[\text{C}_{36}\text{H}_{34}\text{N}_2\text{NaO}_2]^+$  ( $\text{M} + \text{Na}^+$ ) 549.2512, found 549.2536.

**(3*b*S,3*c*S,9*a*R)-2-(methylsulfonyl)-3*b*-(4-(pyrrolidin-1-yl)phenyl)-2,3,3*b*,3*c*,8,9-hexahydro-1*H*-benzo[*e*]naphtho[2',1':1,3]cyclopropa[1,2-*g*]isoindole (5*f*)**

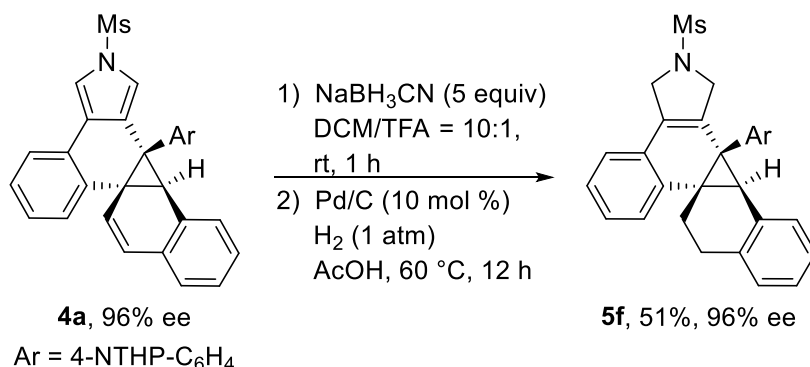

Compound **5f** was prepared according to the known procedure (0.25 mmol scale)<sup>2,5</sup> in 51% yield (64.9 mg) as a white solid (mp 146–147 °C).  $[\alpha]_D^{25} = -189.0^\circ$  ( $c = 1.0$ , CHCl<sub>3</sub>). 96% ee (determined by HPLC: Chiralpak IE Column, 30/70 *i*-PrOH/hexane, 1.0 mL/min, 254 nm; TR = 15.05 min (minor), 18.79 min (major)). <sup>1</sup>H NMR (400 MHz, CDCl<sub>3</sub>)  $\delta$  7.71 (d,  $J = 8.0$  Hz, 1H), 7.39 – 7.25 (m, 3H), 7.21 – 7.13 (m, 1H), 7.12 – 7.05 (m, 1H), 7.03 (d,  $J = 7.6$  Hz, 1H), 6.97 (d,  $J = 8.4$  Hz, 1H), 6.87 (d,  $J = 7.6$  Hz, 1H), 6.55 – 6.38 (m, 2H), 6.12 (d,  $J = 8.4$  Hz, 1H), 4.73 – 4.49 (m, 2H), 4.34 – 4.16 (m, 1H), 3.73 – 3.60 (m, 1H), 3.25 – 3.11 (m, 4H), 2.91 – 2.81 (m, 1H), 2.80 (s, 3H), 2.59 – 2.46 (m, 1H), 2.21 – 2.11 (m, 1H), 2.02 – 1.93 (m, 4H), 1.92 (s, 1H), 1.78 – 1.65 (m, 1H); <sup>13</sup>C NMR (100 MHz, CDCl<sub>3</sub>)  $\delta$  146.8, 139.0, 138.7, 135.5, 133.9, 131.0, 130.2, 129.1, 128.2, 127.5, 127.4, 126.0, 125.9, 125.5, 124.4, 123.5, 112.4, 110.9, 57.1, 54.7, 47.4, 41.1, 35.7, 34.6, 32.8, 27.4, 25.4, 23.8; IR (neat): 3058, 2919, 1612, 1525, 1488, 1378, 1266, 1154, 1053, 959; HRESIMS Calcd for [C<sub>32</sub>H<sub>32</sub>N<sub>2</sub>NaO<sub>2</sub>S]<sup>+</sup> (M + Na<sup>+</sup>) 531.2077, found 531.2115.

**dimethyl (12*R*,15*S*,15*a*S)-16-(methylsulfonyl)-11-(4-(pyrrolidin-1-yl)phenyl)-15,15*a*-dihydro-12*H*-12,15-epiminodibenzo[3,4:5,6]cyclohepta[1,2-*a*]naphthalene-13,14-dicarboxylate (5*g*)**

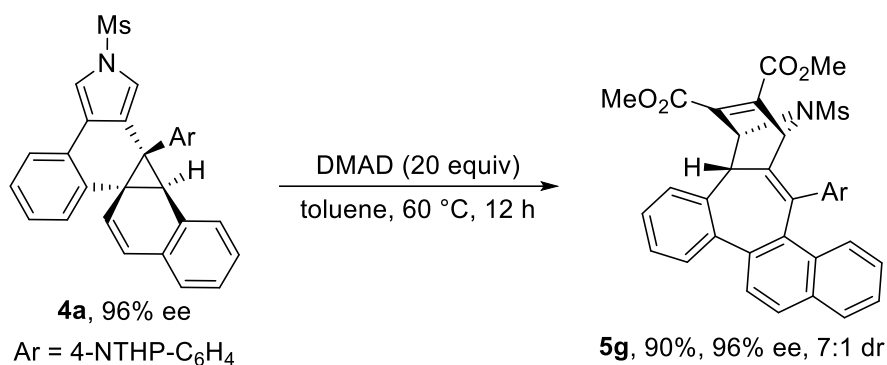

Compound **5g** was prepared according to the known procedure (0.1 mmol scale)<sup>6</sup> in 90% yield (58.2 mg) as pale yellow solid (mp 141–142 °C).  $[\alpha]_D^{25} = +172.2^\circ$  ( $c = 1.0$ , CHCl<sub>3</sub>). 96% ee (determined by HPLC: Chiralpak IC Column, 50/50 *i*-PrOH/hexane, 1.0 mL/min, 254 nm; TR = 18.30 min (major), 29.17 min (minor)). <sup>1</sup>H NMR (400 MHz, CDCl<sub>3</sub>)  $\delta$  7.84 (d,  $J = 8.8$  Hz, 1H), 7.83 – 7.74 (m, 3H), 7.70 (d,  $J = 8.8$  Hz, 1H), 7.54 (d,  $J = 7.6$  Hz, 1H), 7.48 – 7.38 (m, 2H), 7.36 – 7.29 (m, 1H), 7.22 – 7.16 (m, 1H), 6.90 (d,  $J = 8.4$  Hz, 2H), 6.36 (d,  $J = 8.8$  Hz, 2H), 5.82 (s, 1H), 5.76 (s, 1H), 4.04 (s, 3H), 3.73 (s, 3H), 3.24 (s, 1H), 3.22 – 3.13 (m, 4H), 2.89 (s, 3H), 1.99 – 1.87 (m, 4H); <sup>13</sup>C NMR (100 MHz, CDCl<sub>3</sub>)  $\delta$  163.7, 162.2, 147.4, 146.8, 140.7, 139.7, 139.1, 136.9, 136.8, 135.3, 132.9, 132.4, 131.6, 129.8, 128.9, 128.2, 128.1, 128.0, 127.9(1), 127.8(7), 126.8, 125.7, 125.4, 123.7, 111.4, 67.2, 65.8, 53.0, 52.5, 47.4, 45.6, 40.8, 25.4; IR (neat): 2925, 2852, 1716, 1683, 1521, 1487, 1339, 1266, 1158, 1124, 1084, 1019, 766; HRESIMS Calcd for [C<sub>38</sub>H<sub>34</sub>N<sub>2</sub>NaO<sub>6</sub>S]<sup>+</sup> (M + Na<sup>+</sup>) 669.2030, found 669.2093.

**(3b*S*,3c*S*,9a*R*)-3b-([1,1'-biphenyl]-4-yl)-2-(methylsulfonyl)-3b,3c-dihydro-2*H*-benzo[*e*]naphtho[2',1':1,3]cyclopropa[1,2-*g*]isoindole (**5h**)**

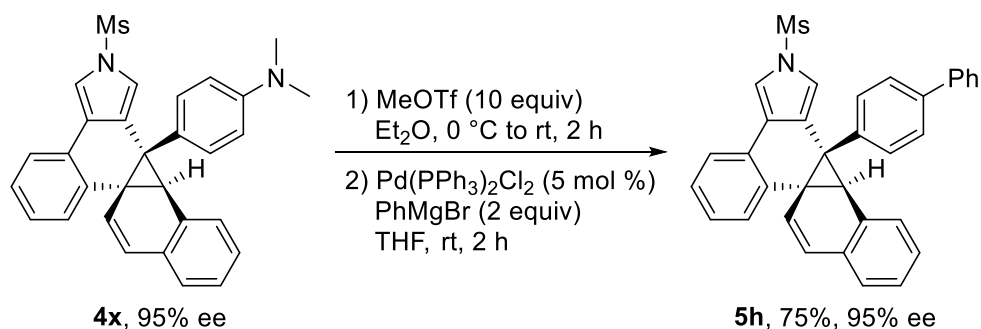

Compound **5h** was prepared according to the known procedure (0.15 mmol scale)<sup>5</sup> in 75% yield (38.4 mg) as a white solid (mp 161–162 °C).  $[\alpha]_D^{25} = +602.2^\circ$  ( $c = 1.0$ ,

CHCl<sub>3</sub>). 95% ee (determined by HPLC: Chiralpak IE Column, 40/60 *i*-PrOH/hexane, 1.0 mL/min, 254 nm; TR = 6.04 min (minor), 7.06 min (major)). <sup>1</sup>H NMR (400 MHz, CDCl<sub>3</sub>) δ 7.70 – 7.65 (m, 1H), 7.53 – 7.48 (m, 3H), 7.45 – 7.34 (m, 5H), 7.34 – 7.25 (m, 4H), 7.17 – 7.02 (m, 3H), 6.90 (d, *J* = 7.2 Hz, 1H), 6.78 (dd, *J* = 8.0, 1.6 Hz, 1H), 6.60 (d, *J* = 2.4 Hz, 1H), 6.39 – 6.20 (m, 2H), 3.14 (s, 3H), 2.73 (s, 1H); <sup>13</sup>C NMR (150 MHz, CDCl<sub>3</sub>) δ 140.6, 138.8, 137.5, 136.3, 133.2, 131.7, 131.1(3), 131.1(0), 130.0, 129.0, 128.6, 127.8, 127.7, 127.6, 127.5, 127.1, 126.9, 126.8, 126.4, 125.8, 125.4, 125.2, 123.2, 121.6, 118.8, 114.0, 42.8, 41.2, 37.1, 28.2. IR (neat): 3028, 2927, 1600, 1479, 1367, 1322, 1265, 1208, 1173, 1069; HRESIMS Calcd for [C<sub>34</sub>H<sub>25</sub>NNaO<sub>2</sub>S]<sup>+</sup> (M + Na<sup>+</sup>) 534.1498, found 534.1538.

## 6. Crystal Data

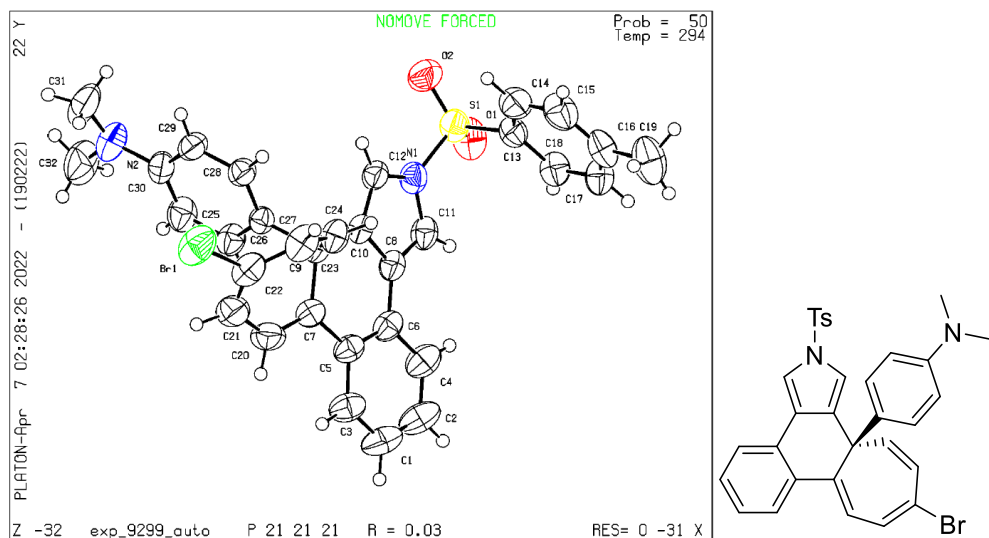

Bond precision: C-C = 0.0042 Å

Wavelength=1.54184

Cell: a=11.5974(1)

b=11.6264(1)

c=20.4174(2)

alpha=90

beta=90

gamma=90

Temperature: 294 K

|                        | Calculated         | Reported           |
|------------------------|--------------------|--------------------|
| Volume                 | 2753.00 (4)        | 2753.00 (4)        |
| Space group            | P 21 21 21         | P 21 21 21         |
| Hall group             | P 2ac 2ab          | P 2ac 2ab          |
| Moiety formula         | C32 H27 Br N2 O2 S | C32 H27 Br N2 O2 S |
| Sum formula            | C32 H27 Br N2 O2 S | C32 H27 Br N2 O2 S |
| Mr                     | 583.52             | 583.52             |
| Dx, g cm <sup>-3</sup> | 1.408              | 1.408              |
| Z                      | 4                  | 4                  |
| Mu (mm <sup>-1</sup> ) | 2.996              | 2.996              |
| F000                   | 1200.0             | 1200.0             |
| F000'                  | 1201.44            |                    |
| h, k, lmax             | 14, 14, 25         | 14, 14, 25         |
| Nref                   | 5722 [ 3226]       | 5603               |
| Tmin, Tmax             | 0.942, 0.942       | 0.841, 1.000       |
| Tmin'                  | 0.942              |                    |

Correction method= # Reported T Limits: Tmin=0.841 Tmax=1.000

AbsCorr = MULTI-SCAN

Data completeness= 1.74/0.98

Theta(max)= 75.395

R(reflections)= 0.0293( 5350)

wR2(reflections)=

0.0834( 5603)

S = 1.033

Npar= 346

**Table S3.** Crystal data and structure refinement for **2b**.

CCDC Number = 2301623.

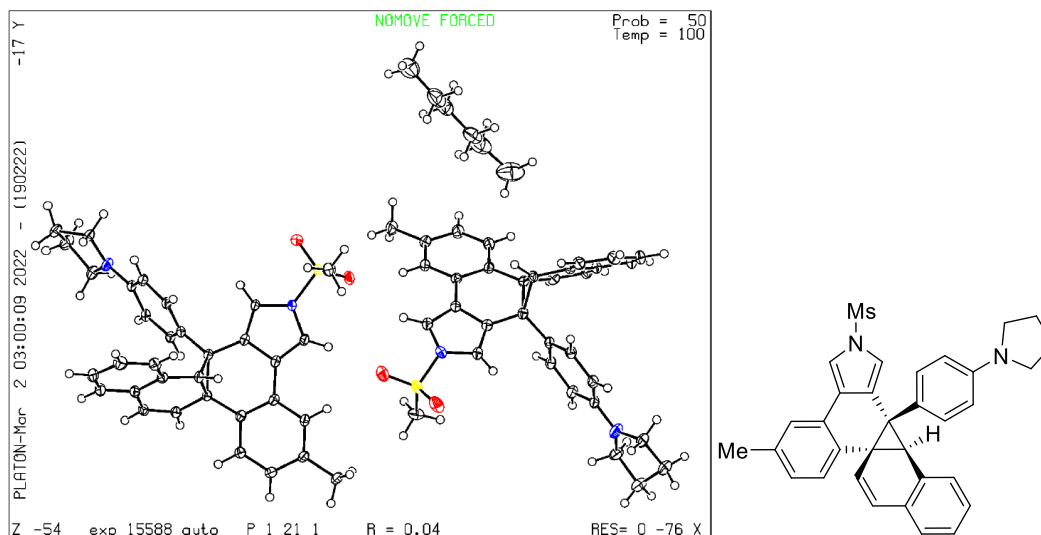

|                                                               |                            |                                  |                           |
|---------------------------------------------------------------|----------------------------|----------------------------------|---------------------------|
| Bond precision:                                               | C-C = 0.0038 A             | Wavelength=1.54184               |                           |
| Cell:                                                         | a=15.6026 (2)<br>alpha=90  | b=10.9134 (1)<br>beta=95.753 (1) | c=17.5508 (2)<br>gamma=90 |
| Temperature:                                                  | 100 K                      |                                  |                           |
|                                                               | Calculated                 | Reported                         |                           |
| Volume                                                        | 2973.45 (6)                | 2973.45 (6)                      |                           |
| Space group                                                   | P 21                       | P 1 21 1                         |                           |
| Hall group                                                    | P 2yb                      | P 2yb                            |                           |
| Moiety formula                                                | 2(C33 H30 N2 O2 S), C6 H14 | C33 H30 N2 O2 S, 0.5(C6 H14)     |                           |
| Sum formula                                                   | C72 H74 N4 O4 S2           | C36 H37 N2 O2 S                  |                           |
| Mr                                                            | 1123.47                    | 561.73                           |                           |
| Dx, g cm-3                                                    | 1.255                      | 1.255                            |                           |
| Z                                                             | 2                          | 4                                |                           |
| Mu (mm-1)                                                     | 1.236                      | 1.236                            |                           |
| F000                                                          | 1196.0                     | 1196.0                           |                           |
| F000'                                                         | 1200.42                    |                                  |                           |
| h, k, lmax                                                    | 19, 13, 21                 | 19, 13, 21                       |                           |
| Nref                                                          | 12141 [ 6403]              | 8473                             |                           |
| Tmin, Tmax                                                    | 0.940, 0.976               | 0.749, 1.000                     |                           |
| Tmin'                                                         | 0.940                      |                                  |                           |
| Correction method= # Reported T Limits: Tmin=0.749 Tmax=1.000 |                            |                                  |                           |
| AbsCorr = MULTI-SCAN                                          |                            |                                  |                           |
| Data completeness=                                            | 1.32/0.70                  | Theta(max)=                      | 74.408                    |
| R(reflections)=                                               | 0.0359 ( 8012)             | wR2(reflections)=                | 0.0900 ( 8473)            |
| S =                                                           | 1.047                      | Npar=                            | 745                       |

**Table S4.** Crystal data and structure refinement for **4I**.

CCDC Number = 2301624.



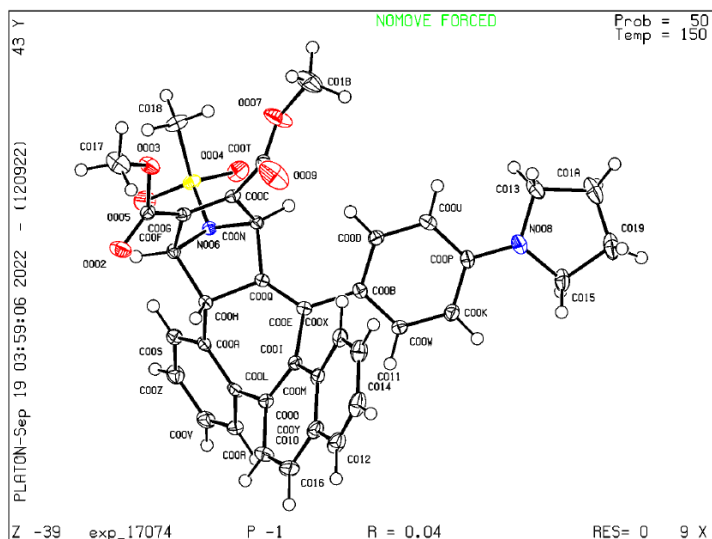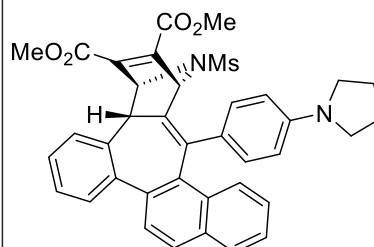

Bond precision: C-C = 0.0026 Å

Wavelength=1.54184

Cell: a=10.3211 (6) b=10.9346 (5) c=17.0233 (8)  
 alpha=92.326 (4) beta=95.527 (4) gamma=116.468 (5)  
 Temperature: 150 K

|                        | Calculated                                                                  | Reported                                                        |
|------------------------|-----------------------------------------------------------------------------|-----------------------------------------------------------------|
| Volume                 | 1704.30 (17)                                                                | 1704.29 (16)                                                    |
| Space group            | P -1                                                                        | P -1                                                            |
| Hall group             | -P 1                                                                        | -P 1                                                            |
| Moiety formula         | C <sub>38</sub> H <sub>34</sub> N <sub>2</sub> O <sub>6</sub> S [+ solvent] | C <sub>38</sub> H <sub>34</sub> N <sub>2</sub> O <sub>6</sub> S |
| Sum formula            | C <sub>38</sub> H <sub>34</sub> N <sub>2</sub> O <sub>6</sub> S [+ solvent] | C <sub>38</sub> H <sub>34</sub> N <sub>2</sub> O <sub>6</sub> S |
| Mr                     | 646.73                                                                      | 646.73                                                          |
| Dx, g cm <sup>-3</sup> | 1.260                                                                       | 1.260                                                           |
| Z                      | 2                                                                           | 2                                                               |
| Mu (mm <sup>-1</sup> ) | 1.241                                                                       | 1.241                                                           |
| F <sub>000</sub>       | 680.0                                                                       | 680.0                                                           |
| F <sub>000</sub> '     | 682.67                                                                      |                                                                 |
| h, k, lmax             | 12, 13, 21                                                                  | 12, 13, 21                                                      |
| Nref                   | 6936                                                                        | 6714                                                            |
| Tmin, Tmax             | 0.748, 0.793                                                                |                                                                 |
| Tmin'                  | 0.679                                                                       |                                                                 |

Correction method= Not given

Data completeness= 0.968

Theta(max)= 74.308

R(reflections)= 0.0415 ( 5675)

wR2 (reflections)=  
0.1087 ( 6714)

S = 1.041

Npar= 428

**Table S5.** Crystal data and structure refinement for **5g**.

CCDC Number = 2301659.

## 7. Computational Studies

### 7.1. Computational Details

All density functional theory (DFT) calculations were performed using Gaussian 16 program<sup>7</sup>. Geometry optimizations of all structures were carried using B3LYP functional<sup>8,9</sup> with Grimme's dispersion corrections<sup>10,11</sup> and 6-31G(d) basis set<sup>12</sup> for C, H, N, O, S, and LANL2DZ pseudo-potential basis set<sup>13</sup> for Cu and Br. The solvation effects in toluene/2-MeTHF were calculated with a self-consistent reaction field (SCRF) using the PCM solvation model<sup>14,15</sup>. Frequency analysis was performed at the same level of theory as geometry optimization to confirm whether optimized stationary points were either local minimum or transition state, as well as to evaluate zero-point vibrational energies and thermal corrections for enthalpies and free energies at 298.15 K. For critical transition states, intrinsic reaction coordinates (IRC) analysis was also performed at the same level of theory as geometry optimization to verify the proposed process. Single-point energies were computed with PBE0 functional<sup>16</sup> with Grimme's dispersion corrections and 6-311++G(d,p) basis set<sup>17</sup> for C, H, N, O, S, and Stuttgart pseudo-potential basis set<sup>18</sup> for Cu and Br with the inclusion of solvent correction at the PCM (toluene/2-Me THF) level. The 3D diagrams of DFT-optimized structures were generated with CYLview2.0 software<sup>19</sup>. Independent gradient model (IGM) analysis was used to verify non-covalent interactions<sup>20-22</sup>.

To correct the Gibbs free energies under 1 atm to the standard state in solution (1 mol/L), a correction of  $R\ln(cs/cg)$  is added to energies of all species. *cs* stands for the standard molar concentration in solution (1 mol/L), *cg* stands for the standard molar concentration in gas phase (0.040876 mol/L), and *R* is the gas constant. For calculated intermediates at the standard state of 1 mol/L at 298.15 K, the correction value equaling to 1.89 kcal/mol was used.

To correct the entropy change in solution, we applied an empirical approach<sup>23</sup> because there is currently no widely accepted quantum mechanics-based approach to correct entropy in solution. For each component change in a reaction at 298 K and 1 atm, a correction of 4.3 kcal/mol is applied to the reaction free energy (i.e., a reaction

from m- to ncomponents has an additional free energy correction for  $(n-m) \times 4.3$  kcal/mol). This approach has been validated through a number of computational and experimental studies.

### ***Conformational Search***

For conformational search, we applied the Conformer-Rotamer Ensemble Sampling Tool (CREST, version 2.10.2)<sup>24</sup> using the xTB package (version 6.1)<sup>25</sup> in combination with DFT optimizations. The conformers generated by CREST were optimized with GFN2-xTB. The solvation effects in toluene were calculated with GBSA implicit solvation model. An energy window of 6.0 kcal/mol and a RMSD threshold of 0.25 Å was used for sampling. For conformational samplings of transition state structures, atoms in the forming/cleaving bonds were constrained by applying a force constant of 1.0 Hartree/Bohr<sup>2</sup>.

## 7.2. Table of Energies

**Table S6.** Low-energy conformers for **CuL9-S-TS<sub>B1</sub>** with relative enthalpies and Gibbs free energies stability (in kcal/mol) with respect to the most stable geometry.

| Structure                        | $\Delta\Delta G^{\ddagger}_{\text{Sol}}$ | $\Delta\Delta H^{\ddagger}_{\text{Sol}}$ |
|----------------------------------|------------------------------------------|------------------------------------------|
| <b>CuL9-S-TS<sub>B1</sub></b>    | 0.0                                      | 0.0                                      |
| <b>CuL9-S-TS<sub>B1</sub>-S1</b> | 4.1                                      | 3.0                                      |
| <b>CuL9-S-TS<sub>B1</sub>-S2</b> | 0.8                                      | 0.7                                      |
| <b>CuL9-S-TS<sub>B1</sub>-S3</b> | 2.1                                      | 4.0                                      |

**Table S7.** Low-energy conformers for **CuL9-R-TS<sub>B1</sub>** with relative enthalpies and Gibbs free energies stability (in kcal/mol) with respect to the most stable geometry.

| Structure                        | $\Delta\Delta G^{\ddagger}_{\text{Sol}}$ | $\Delta\Delta H^{\ddagger}_{\text{Sol}}$ |
|----------------------------------|------------------------------------------|------------------------------------------|
| <b>CuL9-R-TS<sub>B1</sub></b>    | 0.0                                      | 0.0                                      |
| <b>CuL9-R-TS<sub>B1</sub>-S1</b> | 2.0                                      | 0.6                                      |
| <b>CuL9-R-TS<sub>B1</sub>-S2</b> | 2.6                                      | 3.0                                      |
| <b>CuL9-R-TS<sub>B1</sub>-S3</b> | 1.2                                      | 2.6                                      |

**Table S8.** Low-energy conformers for **CuL12-S-TS<sub>B2</sub>** with relative enthalpies and Gibbs free energies stability (in kcal/mol) with respect to the most stable geometry.

| Structure                         | $\Delta\Delta G^{\ddagger}_{\text{Sol}}$ | $\Delta\Delta H^{\ddagger}_{\text{Sol}}$ |
|-----------------------------------|------------------------------------------|------------------------------------------|
| <b>CuL12-S-TS<sub>B2</sub></b>    | 0.0                                      | 0.0                                      |
| <b>CuL12-S-TS<sub>B2</sub>-S1</b> | 3.0                                      | 1.8                                      |
| <b>CuL12-S-TS<sub>B2</sub>-S2</b> | 3.7                                      | 2.8                                      |
| <b>CuL12-S-TS<sub>B2</sub>-S3</b> | 3.9                                      | 3.0                                      |

**Table S9.** Low-energy conformers for **CuL12-R-TS<sub>B2</sub>** with relative enthalpies and Gibbs free energies stability (in kcal/mol) with respect to the most stable geometry.

| Structure                         | $\Delta\Delta G^{\ddagger}_{\text{Sol}}$ | $\Delta\Delta H^{\ddagger}_{\text{Sol}}$ |
|-----------------------------------|------------------------------------------|------------------------------------------|
| <b>CuL12-R-TS<sub>B2</sub></b>    | 0.0                                      | 0.0                                      |
| <b>CuL12-R-TS<sub>B2</sub>-S1</b> | 3.5                                      | 2.2                                      |
| <b>CuL12-R-TS<sub>B2</sub>-S2</b> | 1.6                                      | -0.3                                     |
| <b>CuL12-R-TS<sub>B2</sub>-S3</b> | 4.0                                      | 1.8                                      |

## 8. HPLC Chromatograms

2a: IE, *i*-PrOH/hexane = 40/60,  $v = 1.0$  mL/min,  $\lambda = 254$  nm

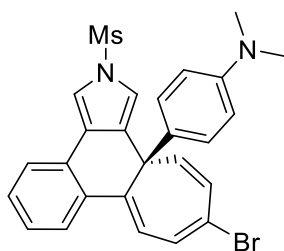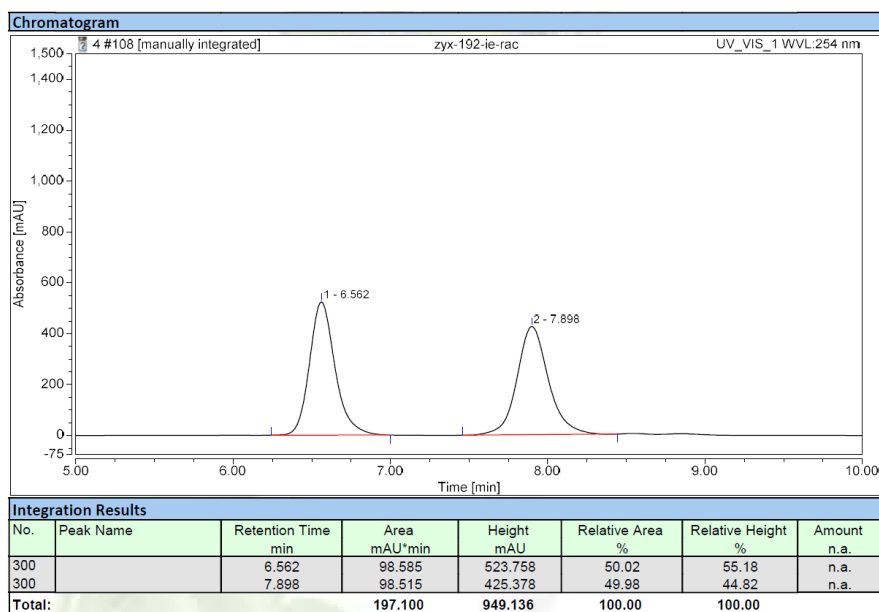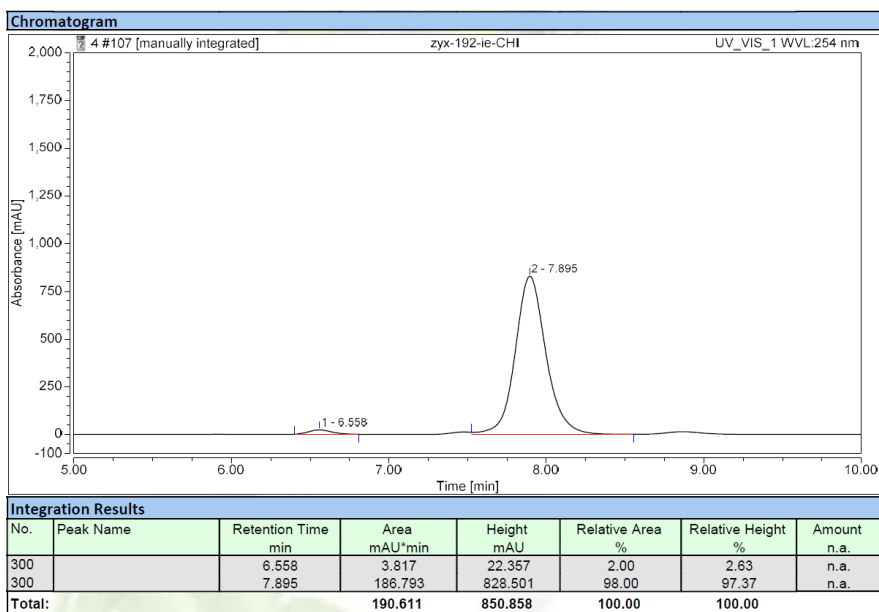

2b: IE, *i*-PrOH/hexane = 30/70,  $v = 1.0$  mL/min,  $\lambda = 254$  nm

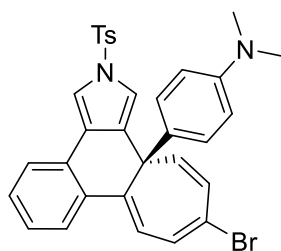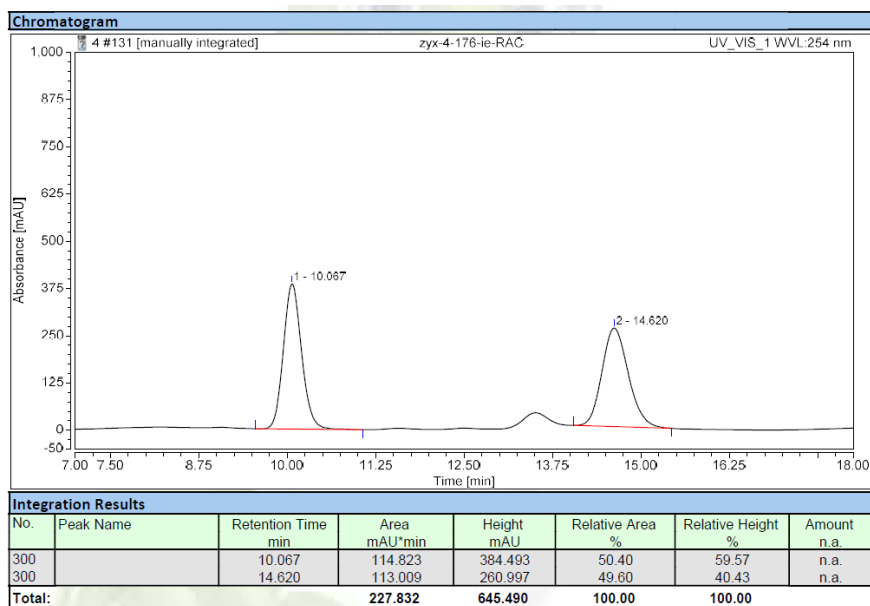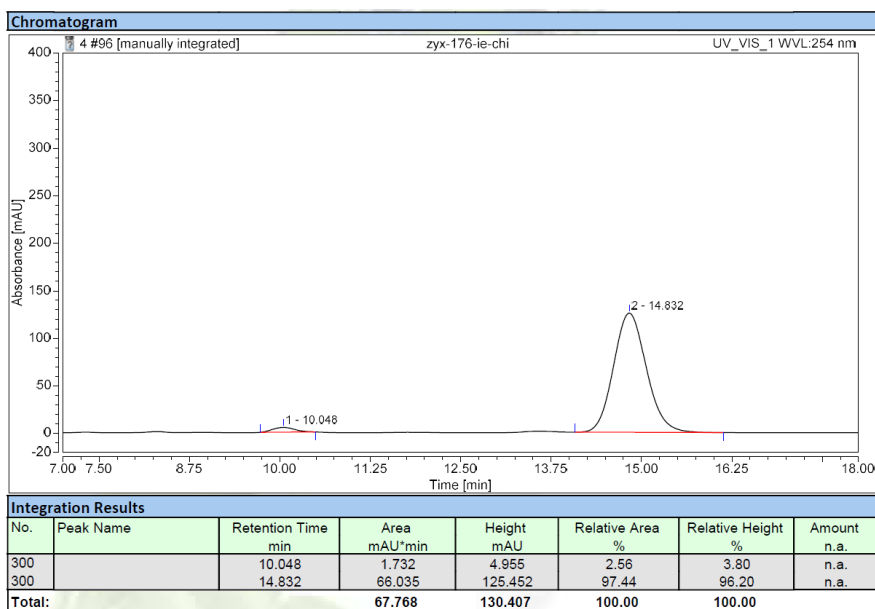

2c: IE, *i*-PrOH/hexane = 30/70,  $v = 1.0$  mL/min,  $\lambda = 254$  nm

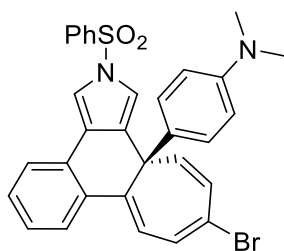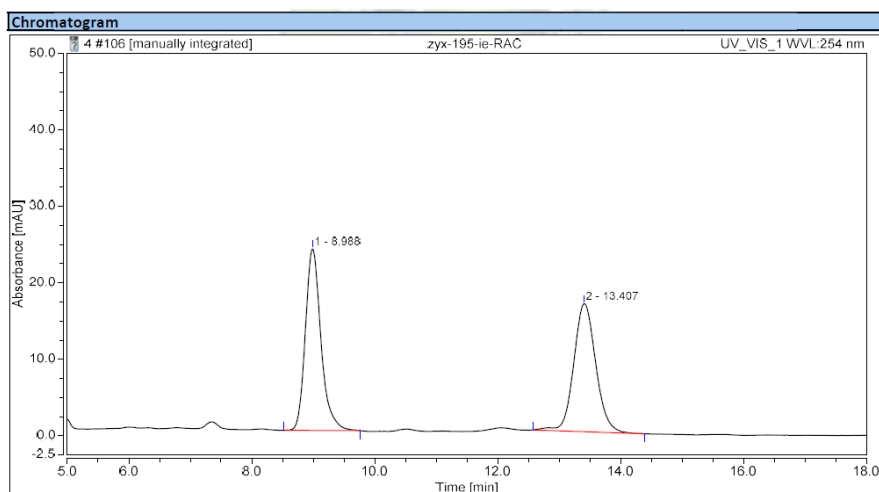

**Integration Results**

| No.           | Peak Name | Retention Time min | Area mAU*min  | Height mAU    | Relative Area % | Relative Height % | Amount n.a. |
|---------------|-----------|--------------------|---------------|---------------|-----------------|-------------------|-------------|
| 300           |           | 8.988              | 6.987         | 23.786        | 50.11           | 58.66             | n.a.        |
| 300           |           | 13.407             | 6.955         | 16.762        | 49.89           | 41.34             | n.a.        |
| <b>Total:</b> |           |                    | <b>13.942</b> | <b>40.549</b> | <b>100.00</b>   | <b>100.00</b>     |             |

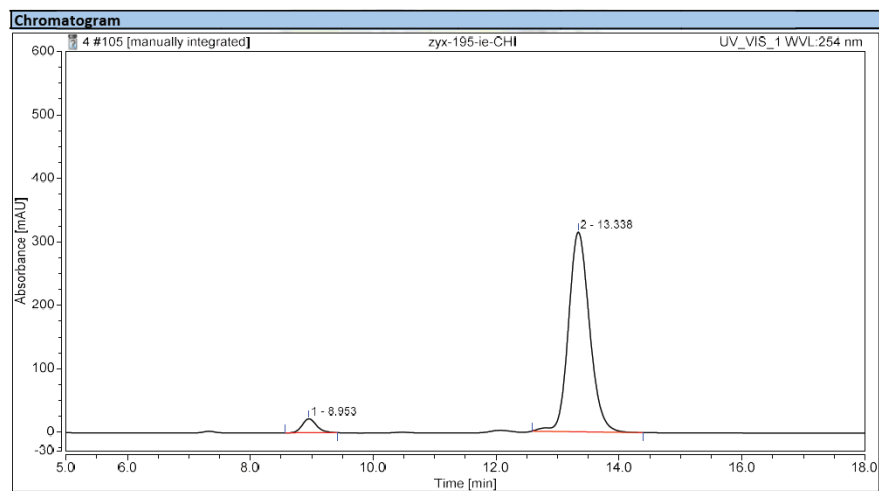

**Integration Results**

| No.           | Peak Name | Retention Time min | Area mAU*min   | Height mAU     | Relative Area % | Relative Height % | Amount n.a. |
|---------------|-----------|--------------------|----------------|----------------|-----------------|-------------------|-------------|
| 300           |           | 8.953              | 5.982          | 22.001         | 4.57            | 6.53              | n.a.        |
| 300           |           | 13.338             | 124.820        | 315.058        | 95.43           | 93.47             | n.a.        |
| <b>Total:</b> |           |                    | <b>130.802</b> | <b>337.059</b> | <b>100.00</b>   | <b>100.00</b>     |             |

2d: IE, *i*-PrOH/hexane = 30/70,  $v = 1.0$  mL/min,  $\lambda = 254$  nm

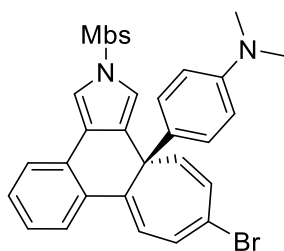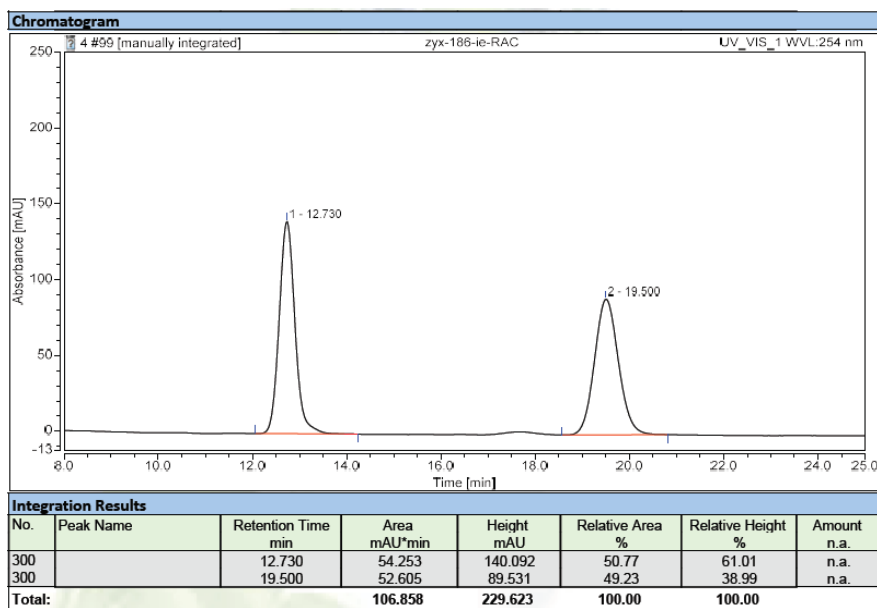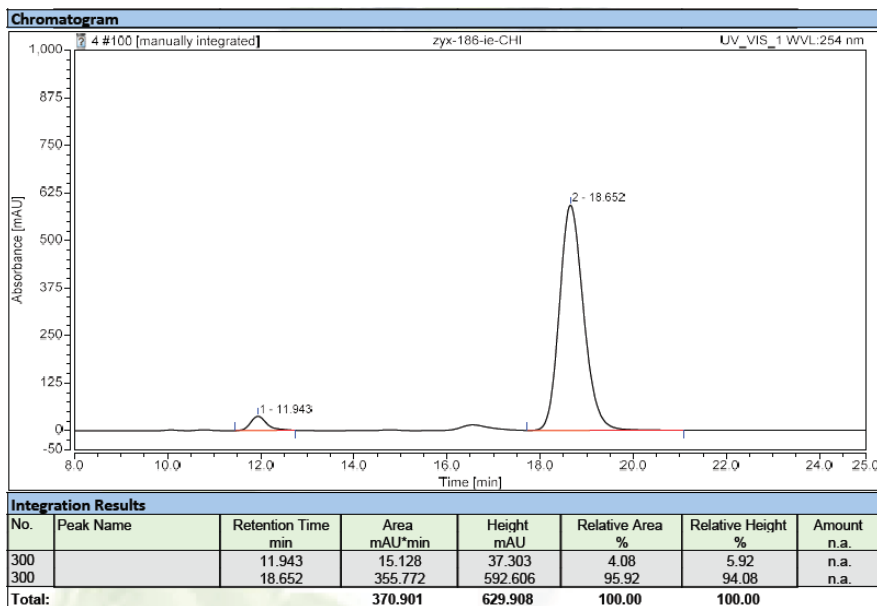



2e: IE, *i*-PrOH/hexane = 30/70,  $v = 1.0$  mL/min,  $\lambda = 254$  nm

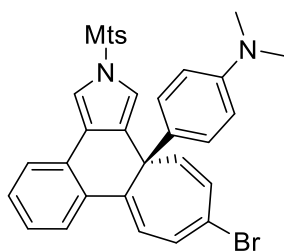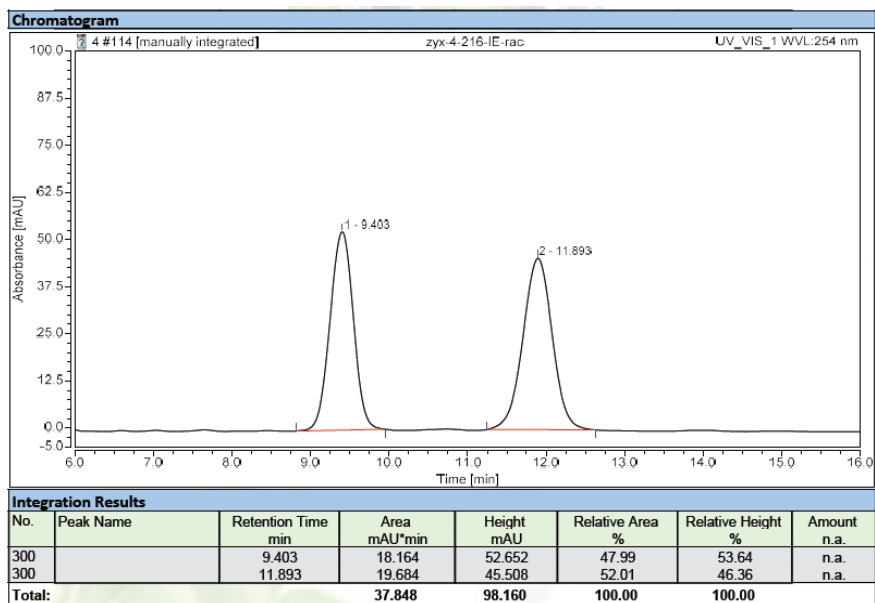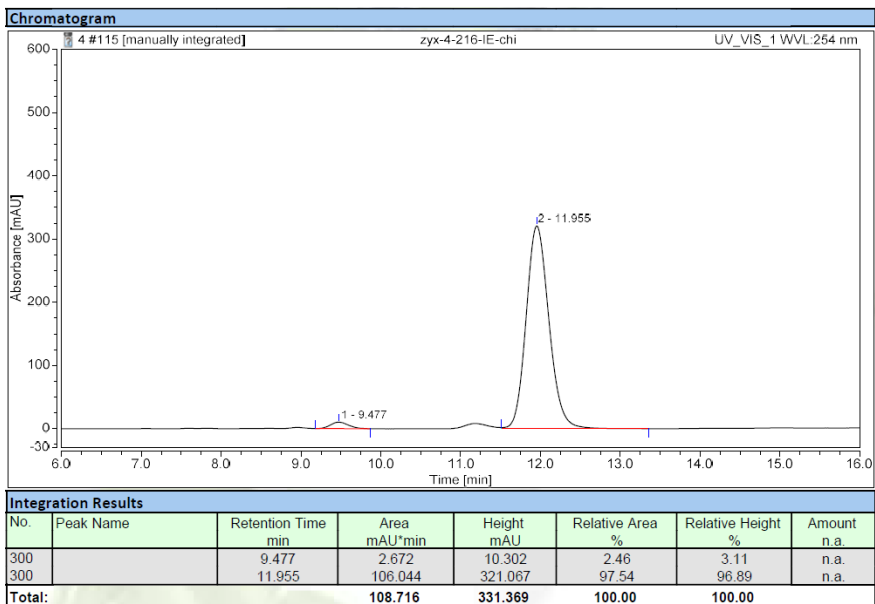

2f: IE, *i*-PrOH/hexane = 30/70,  $v = 1.0$  mL/min,  $\lambda = 254$  nm

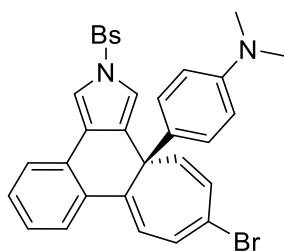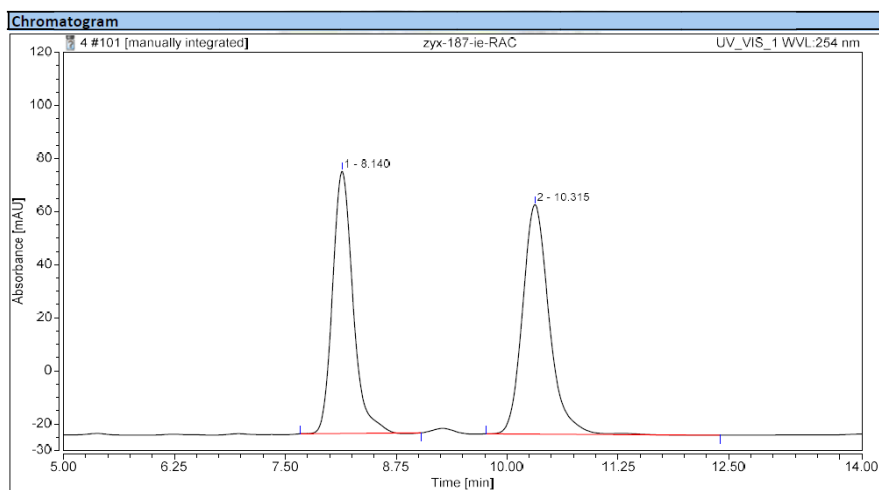

**Integration Results**

| No.           | Peak Name | Retention Time min | Area mAU*min  | Height mAU     | Relative Area % | Relative Height % | Amount n.a. |
|---------------|-----------|--------------------|---------------|----------------|-----------------|-------------------|-------------|
| 300           |           | 8.140              | 26.409        | 98.844         | 46.71           | 53.33             | n.a.        |
| 300           |           | 10.315             | 30.128        | 86.490         | 53.29           | 46.67             | n.a.        |
| <b>Total:</b> |           |                    | <b>56.537</b> | <b>185.335</b> | <b>100.00</b>   | <b>100.00</b>     |             |

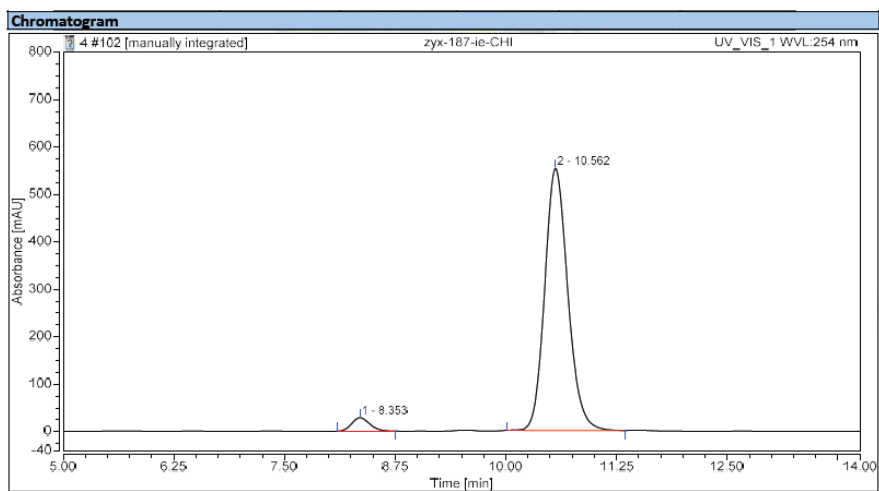

**Integration Results**

| No.           | Peak Name | Retention Time min | Area mAU*min   | Height mAU     | Relative Area % | Relative Height % | Amount n.a. |
|---------------|-----------|--------------------|----------------|----------------|-----------------|-------------------|-------------|
| 300           |           | 8.353              | 6.716          | 28.446         | 3.87            | 4.89              | n.a.        |
| 300           |           | 10.562             | 167.031        | 552.915        | 96.13           | 95.11             | n.a.        |
| <b>Total:</b> |           |                    | <b>173.747</b> | <b>581.360</b> | <b>100.00</b>   | <b>100.00</b>     |             |

2g: IE, *i*-PrOH/hexane = 30/70,  $v = 1.0$  mL/min,  $\lambda = 254$  nm

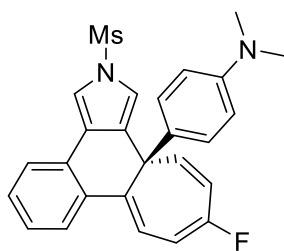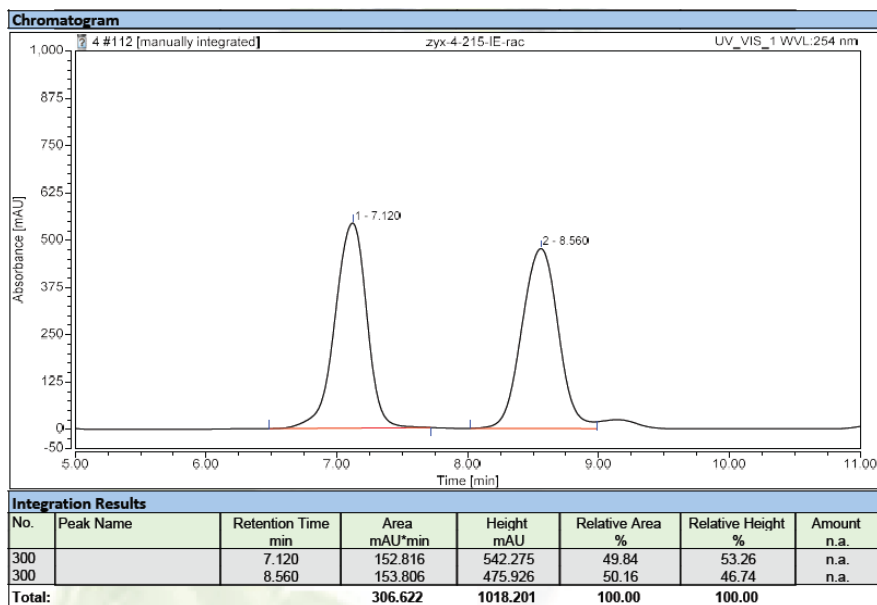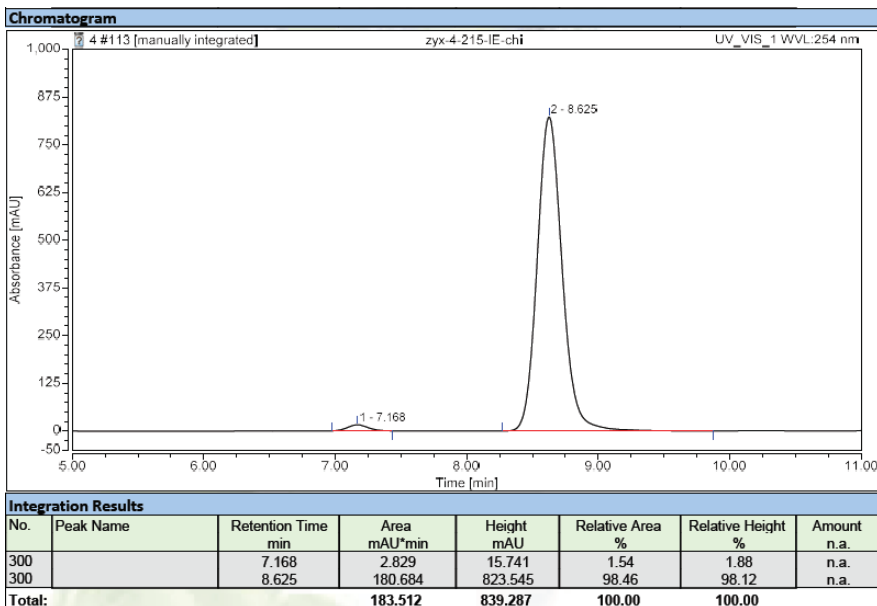

2h: IE, *i*-PrOH/hexane = 30/70,  $v = 1.0$  mL/min,  $\lambda = 254$  nm

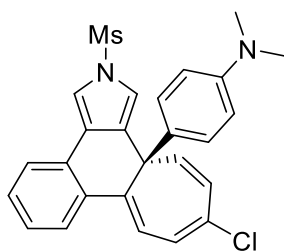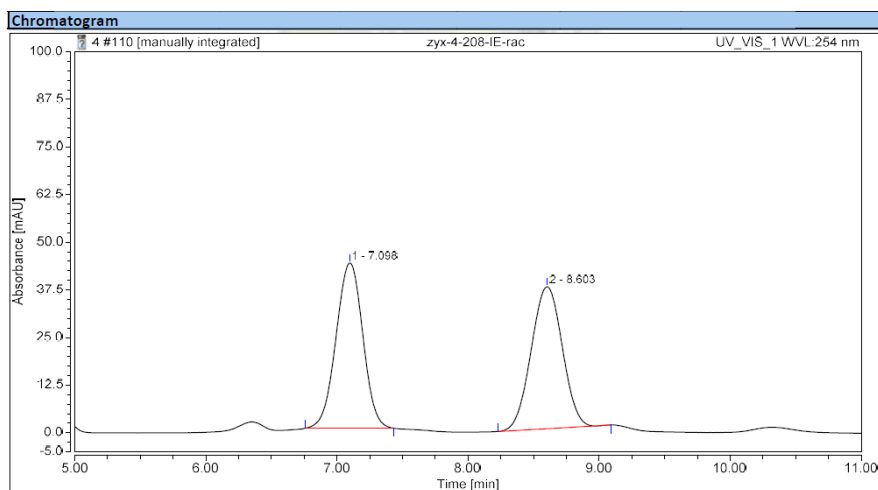

**Integration Results**

| No.           | Peak Name | Retention Time min | Area mAU*min  | Height mAU    | Relative Area % | Relative Height % | Amount n.a. |
|---------------|-----------|--------------------|---------------|---------------|-----------------|-------------------|-------------|
| 300           |           | 7.098              | 10.270        | 43.401        | 50.07           | 53.81             | n.a.        |
| 300           |           | 8.603              | 10.242        | 37.253        | 49.93           | 46.19             | n.a.        |
| <b>Total:</b> |           |                    | <b>20.513</b> | <b>80.654</b> | <b>100.00</b>   | <b>100.00</b>     |             |

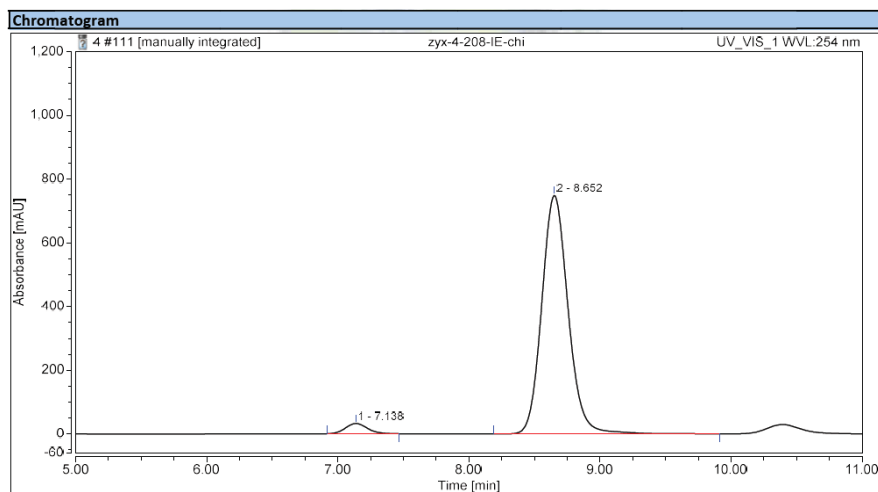

**Integration Results**

| No.           | Peak Name | Retention Time min | Area mAU*min   | Height mAU     | Relative Area % | Relative Height % | Amount n.a. |
|---------------|-----------|--------------------|----------------|----------------|-----------------|-------------------|-------------|
| 300           |           | 7.138              | 6.235          | 32.322         | 3.46            | 4.14              | n.a.        |
| 300           |           | 8.652              | 174.210        | 748.892        | 96.54           | 95.86             | n.a.        |
| <b>Total:</b> |           |                    | <b>180.446</b> | <b>781.214</b> | <b>100.00</b>   | <b>100.00</b>     |             |

2i: IE, *i*-PrOH/hexane = 20/80,  $v = 1.0$  mL/min,  $\lambda = 254$  nm

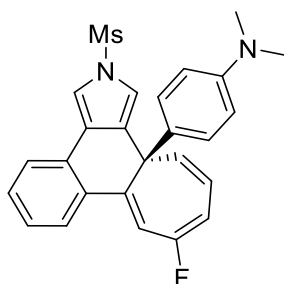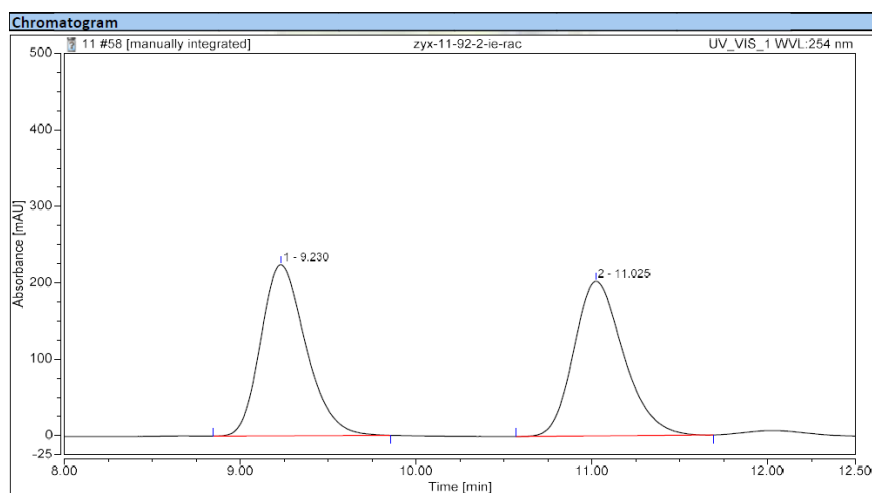

**Integration Results**

| No.           | Peak Name | Retention Time<br>min | Area<br>mAU*min | Height<br>mAU  | Relative Area<br>% | Relative Height<br>% | Amount<br>n.a. |
|---------------|-----------|-----------------------|-----------------|----------------|--------------------|----------------------|----------------|
| 1             |           | 9.230                 | 66.537          | 223.909        | 50.12              | 52.55                | n.a.           |
| 2             |           | 11.025                | 66.215          | 202.179        | 49.88              | 47.45                | n.a.           |
| <b>Total:</b> |           |                       | <b>132.751</b>  | <b>426.088</b> | <b>100.00</b>      | <b>100.00</b>        |                |

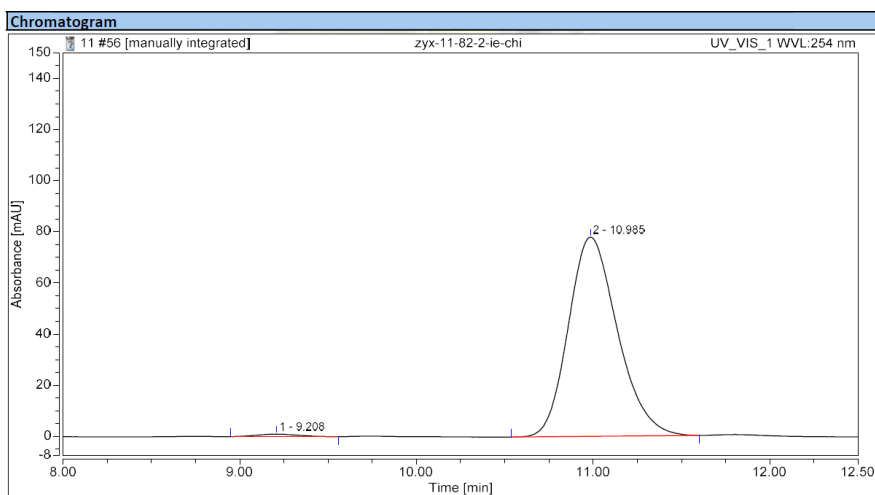

**Integration Results**

| No.           | Peak Name | Retention Time<br>min | Area<br>mAU*min | Height<br>mAU | Relative Area<br>% | Relative Height<br>% | Amount<br>n.a. |
|---------------|-----------|-----------------------|-----------------|---------------|--------------------|----------------------|----------------|
| 1             |           | 9.208                 | 0.253           | 0.970         | 1.00               | 1.23                 | n.a.           |
| 2             |           | 10.985                | 25.062          | 77.899        | 99.00              | 98.77                | n.a.           |
| <b>Total:</b> |           |                       | <b>25.315</b>   | <b>78.869</b> | <b>100.00</b>      | <b>100.00</b>        |                |

2i': IE, *i*-PrOH/hexane = 20/80,  $v = 1.0$  mL/min,  $\lambda = 254$  nm

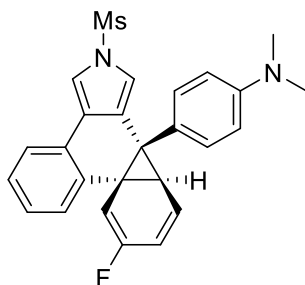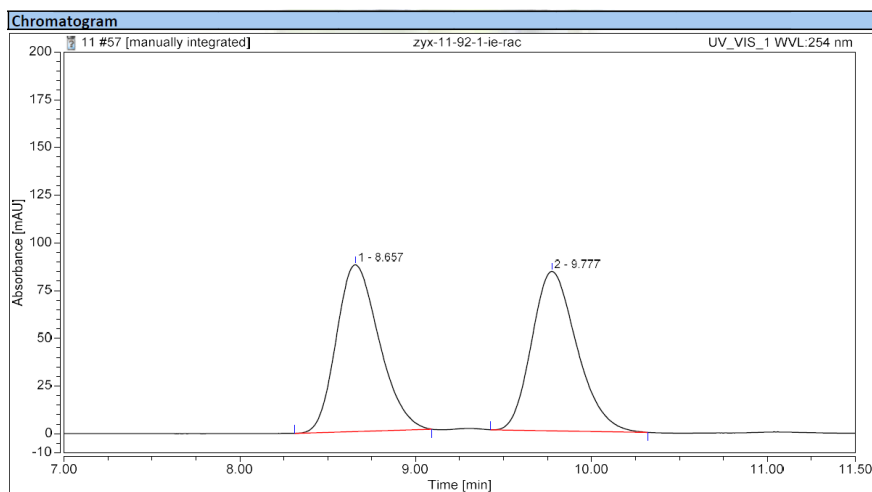

**Integration Results**

| No.           | Peak Name | Retention Time<br>min | Area<br>mAU*min | Height<br>mAU  | Relative Area<br>% | Relative Height<br>% | Amount<br>n.a. |
|---------------|-----------|-----------------------|-----------------|----------------|--------------------|----------------------|----------------|
| 1             |           | 8.657                 | 24.660          | 87.373         | 49.83              | 51.13                | n.a.           |
| 2             |           | 9.777                 | 24.827          | 83.496         | 50.17              | 48.87                | n.a.           |
| <b>Total:</b> |           |                       | <b>49.487</b>   | <b>170.869</b> | <b>100.00</b>      | <b>100.00</b>        |                |

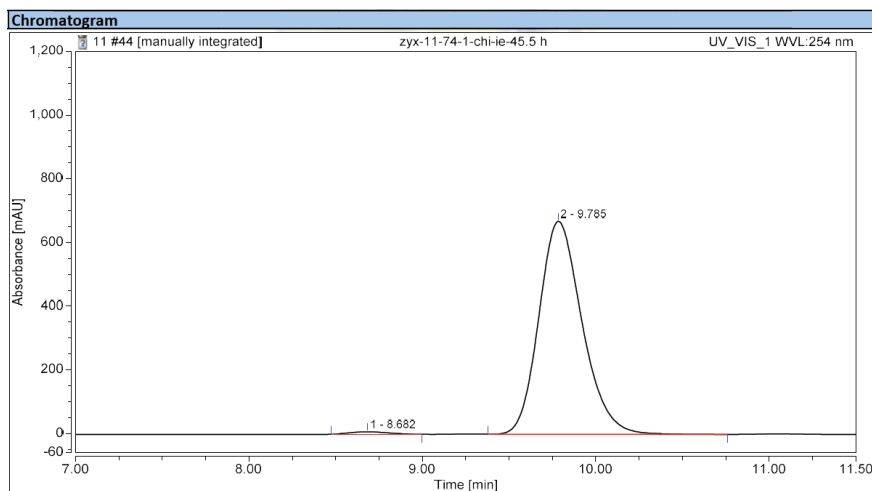

**Integration Results**

| No.           | Peak Name | Retention Time<br>min | Area<br>mAU*min | Height<br>mAU  | Relative Area<br>% | Relative Height<br>% | Amount<br>n.a. |
|---------------|-----------|-----------------------|-----------------|----------------|--------------------|----------------------|----------------|
| 1             |           | 8.682                 | 1.943           | 7.883          | 1.00               | 1.17                 | n.a.           |
| 2             |           | 9.785                 | 192.505         | 668.388        | 99.00              | 98.83                | n.a.           |
| <b>Total:</b> |           |                       | <b>194.448</b>  | <b>676.271</b> | <b>100.00</b>      | <b>100.00</b>        |                |

2j: IE, *i*-PrOH/hexane = 30/70,  $v = 1.0$  mL/min,  $\lambda = 254$  nm

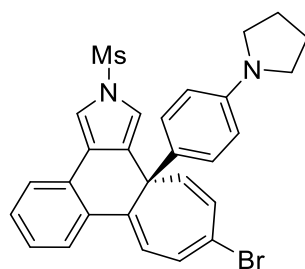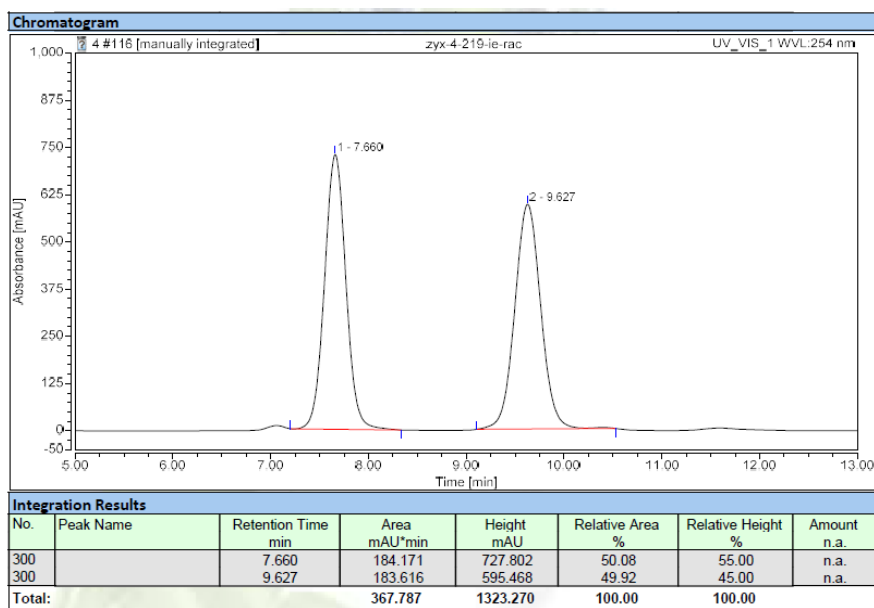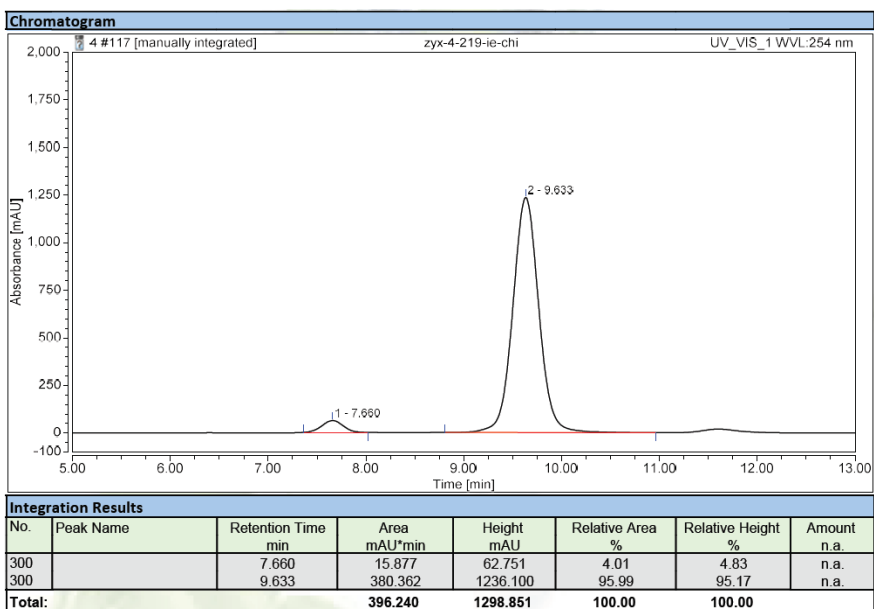

2k: IE, *i*-PrOH/hexane = 30/70,  $v = 1.0$  mL/min,  $\lambda = 254$  nm

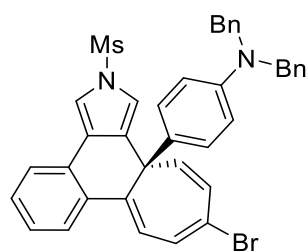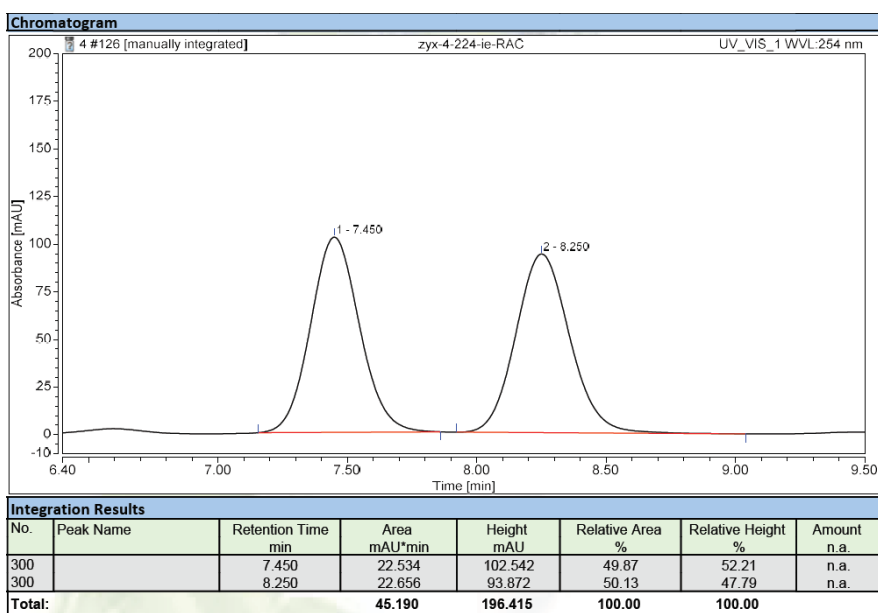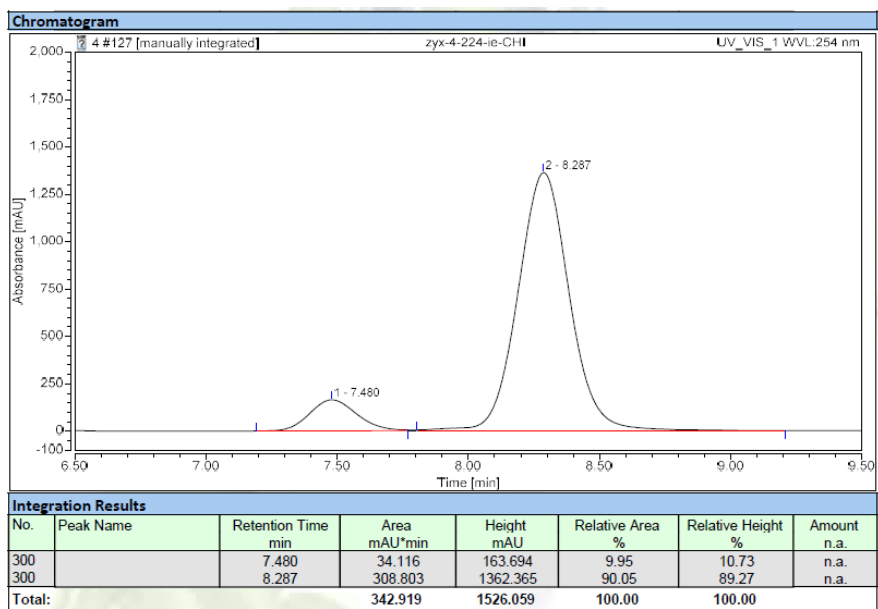



2l: IE, *i*-PrOH/hexane = 30/70,  $v = 1.0$  mL/min,  $\lambda = 254$  nm

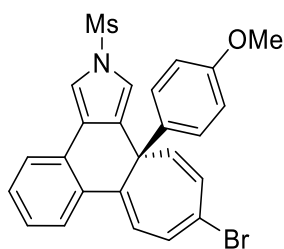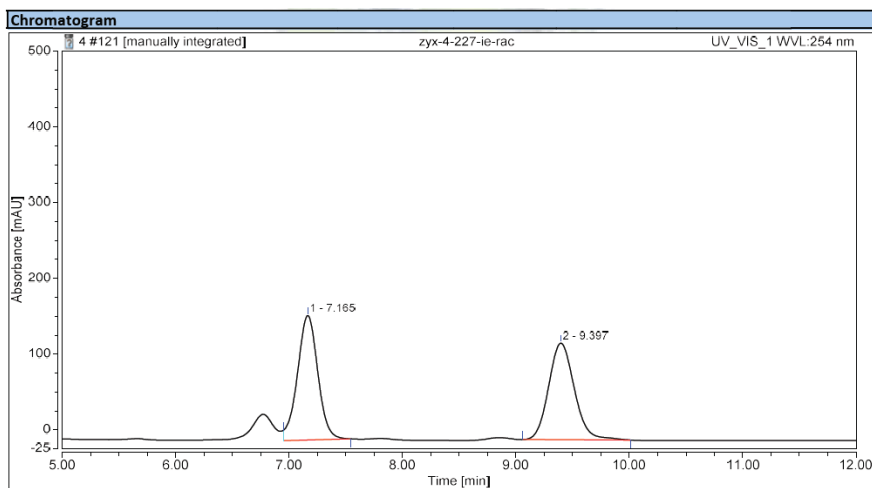

**Integration Results**

| No.           | Peak Name | Retention Time min | Area mAU*min  | Height mAU     | Relative Area % | Relative Height % | Amount n.a. |
|---------------|-----------|--------------------|---------------|----------------|-----------------|-------------------|-------------|
| 300           |           | 7.165              | 34.277        | 164.634        | 50.59           | 56.36             | n.a.        |
| 300           |           | 9.397              | 33.483        | 127.501        | 49.41           | 43.64             | n.a.        |
| <b>Total:</b> |           |                    | <b>67.760</b> | <b>292.135</b> | <b>100.00</b>   | <b>100.00</b>     |             |

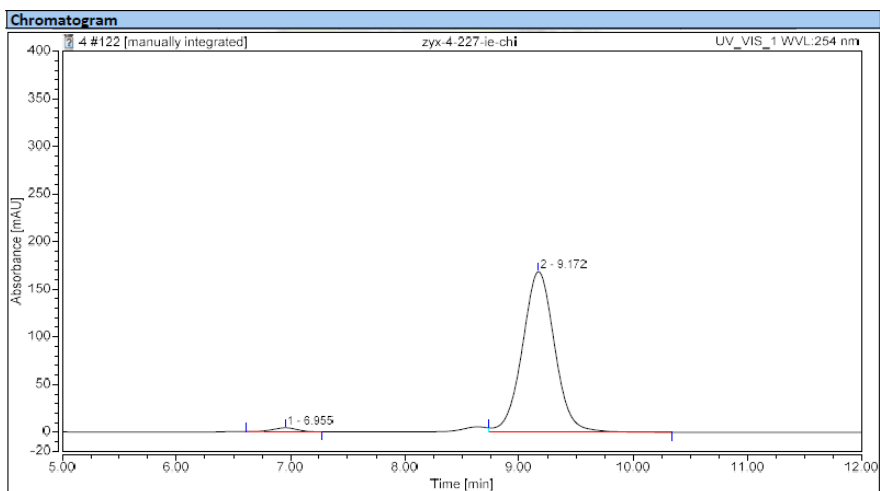

**Integration Results**

| No.           | Peak Name | Retention Time min | Area mAU*min  | Height mAU     | Relative Area % | Relative Height % | Amount n.a. |
|---------------|-----------|--------------------|---------------|----------------|-----------------|-------------------|-------------|
| 300           |           | 6.955              | 1.043         | 4.151          | 1.85            | 2.40              | n.a.        |
| 300           |           | 9.172              | 55.380        | 168.690        | 98.15           | 97.60             | n.a.        |
| <b>Total:</b> |           |                    | <b>56.423</b> | <b>172.841</b> | <b>100.00</b>   | <b>100.00</b>     |             |

2m: IE, *i*-PrOH/hexane = 30/70,  $v = 1.0$  mL/min,  $\lambda = 254$  nm

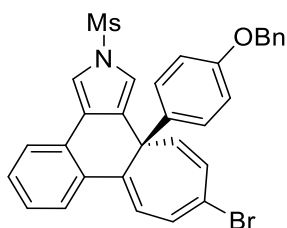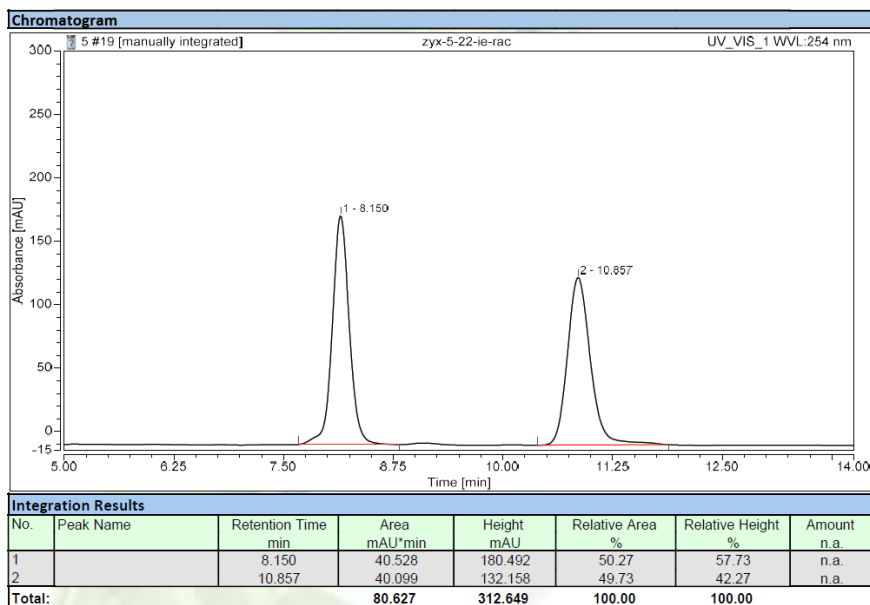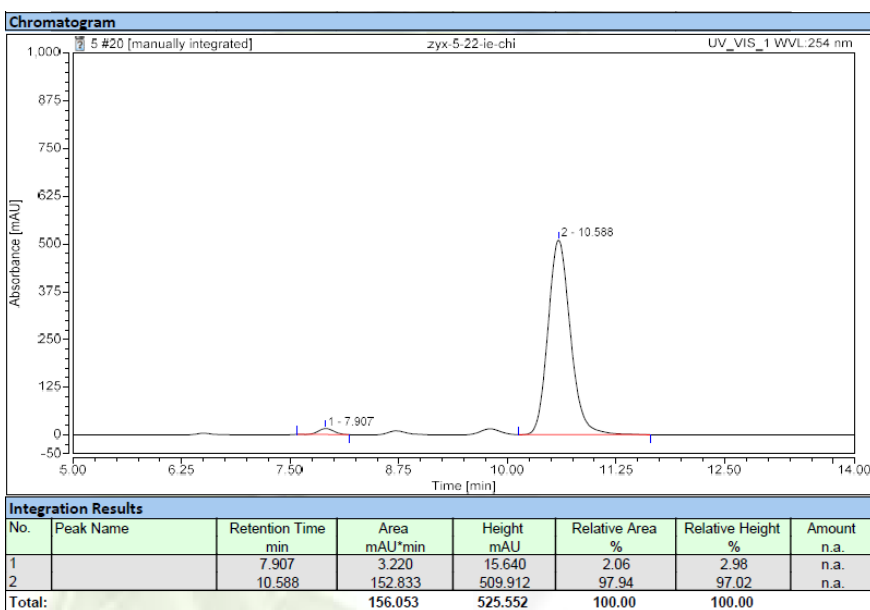

2n: IE, *i*-PrOH/hexane = 20/80,  $v = 1.0$  mL/min,  $\lambda = 254$  nm

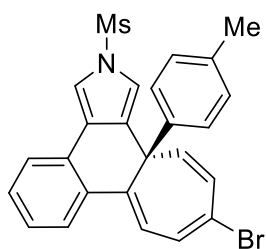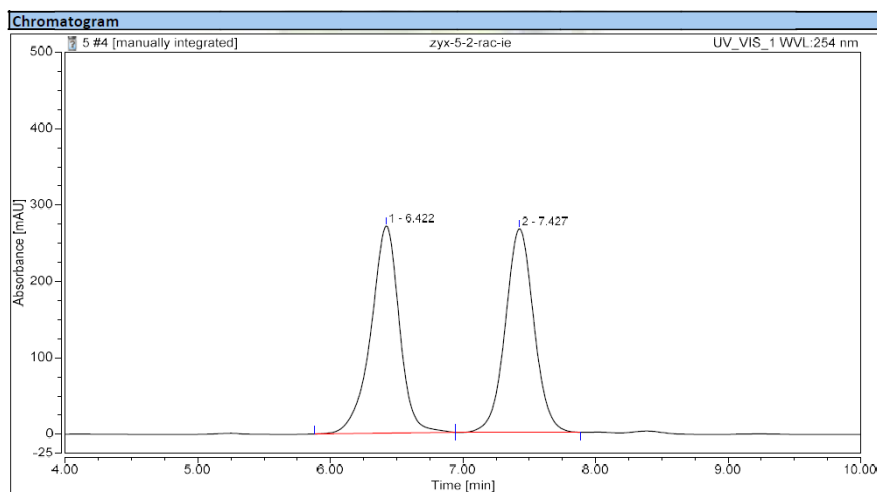

**Integration Results**

| No.           | Peak Name | Retention Time<br>min | Area<br>mAU*min | Height<br>mAU  | Relative Area<br>% | Relative Height<br>% | Amount<br>n.a. |
|---------------|-----------|-----------------------|-----------------|----------------|--------------------|----------------------|----------------|
| 1             |           | 6.422                 | 67.688          | 271.441        | 50.42              | 50.44                | n.a.           |
| 2             |           | 7.427                 | 66.559          | 266.678        | 49.58              | 49.56                | n.a.           |
| <b>Total:</b> |           |                       | <b>134.248</b>  | <b>538.119</b> | <b>100.00</b>      | <b>100.00</b>        |                |

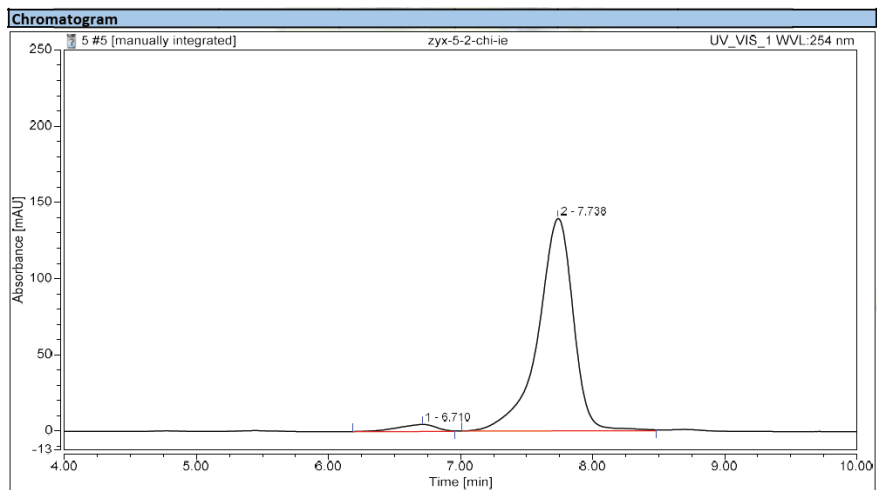

**Integration Results**

| No.           | Peak Name | Retention Time<br>min | Area<br>mAU*min | Height<br>mAU  | Relative Area<br>% | Relative Height<br>% | Amount<br>n.a. |
|---------------|-----------|-----------------------|-----------------|----------------|--------------------|----------------------|----------------|
| 1             |           | 6.710                 | 1.559           | 4.657          | 3.49               | 3.23                 | n.a.           |
| 2             |           | 7.738                 | 43.088          | 139.405        | 96.51              | 96.77                | n.a.           |
| <b>Total:</b> |           |                       | <b>44.648</b>   | <b>144.062</b> | <b>100.00</b>      | <b>100.00</b>        |                |

2o: IE, *i*-PrOH/hexane = 20/80,  $v = 1.0$  mL/min,  $\lambda = 254$  nm

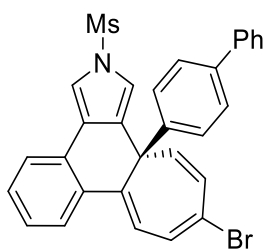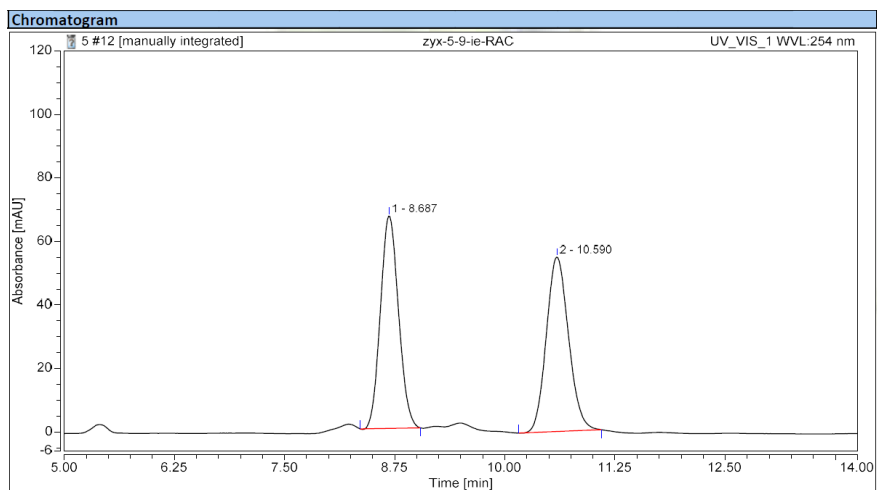

**Integration Results**

| No.           | Peak Name | Retention Time<br>min | Area<br>mAU*min | Height<br>mAU  | Relative Area<br>% | Relative Height<br>% | Amount<br>n.a. |
|---------------|-----------|-----------------------|-----------------|----------------|--------------------|----------------------|----------------|
| 1             |           | 8.687                 | 15.927          | 66.908         | 49.82              | 54.91                | n.a.           |
| 2             |           | 10.590                | 16.043          | 54.949         | 50.18              | 45.09                | n.a.           |
| <b>Total:</b> |           |                       | <b>31.970</b>   | <b>121.857</b> | <b>100.00</b>      | <b>100.00</b>        |                |

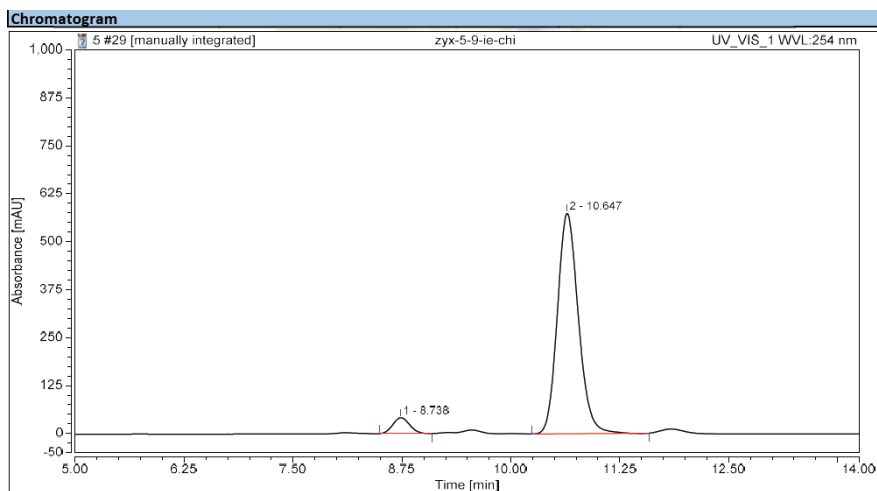

**Integration Results**

| No.           | Peak Name | Retention Time<br>min | Area<br>mAU*min | Height<br>mAU  | Relative Area<br>% | Relative Height<br>% | Amount<br>n.a. |
|---------------|-----------|-----------------------|-----------------|----------------|--------------------|----------------------|----------------|
| 1             |           | 8.738                 | 9.240           | 41.356         | 5.45               | 6.71                 | n.a.           |
| 2             |           | 10.647                | 160.403         | 574.734        | 94.55              | 93.29                | n.a.           |
| <b>Total:</b> |           |                       | <b>169.643</b>  | <b>616.090</b> | <b>100.00</b>      | <b>100.00</b>        |                |

2p: IE, *i*-PrOH/hexane = 20/80,  $v = 1.0$  mL/min,  $\lambda = 254$  nm

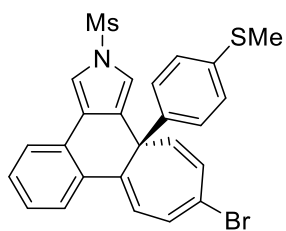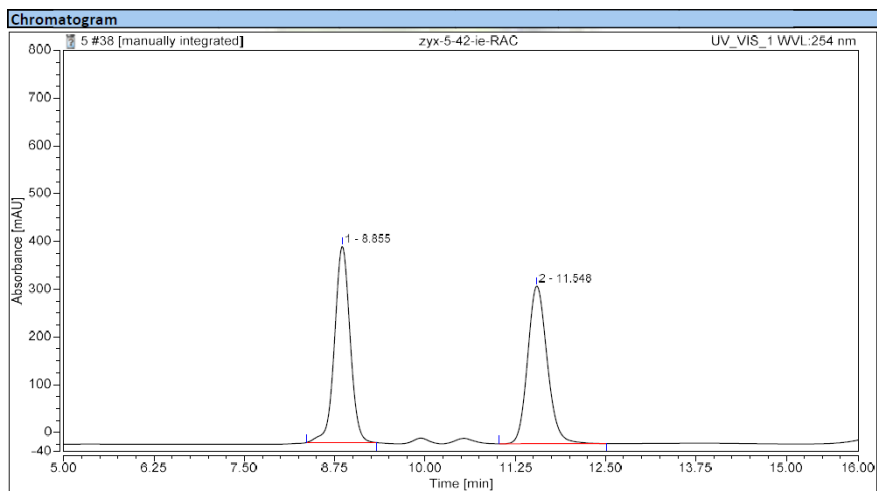

**Integration Results**

| No.           | Peak Name | Retention Time<br>min | Area<br>mAU*min | Height<br>mAU  | Relative Area<br>% | Relative Height<br>% | Amount<br>n.a. |
|---------------|-----------|-----------------------|-----------------|----------------|--------------------|----------------------|----------------|
| 1             |           | 8.855                 | 102.922         | 411.355        | 49.86              | 55.46                | n.a.           |
| 2             |           | 11.548                | 103.517         | 330.415        | 50.14              | 44.54                | n.a.           |
| <b>Total:</b> |           |                       | <b>206.439</b>  | <b>741.770</b> | <b>100.00</b>      | <b>100.00</b>        |                |

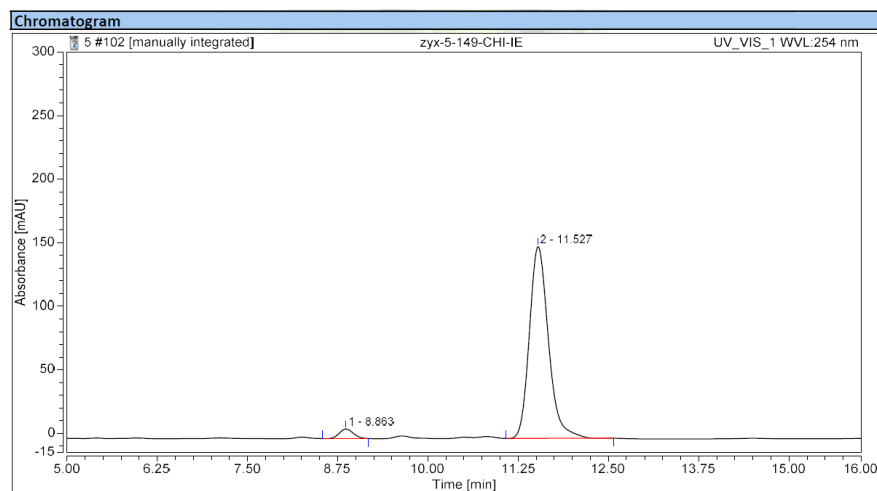

**Integration Results**

| No.           | Peak Name | Retention Time<br>min | Area<br>mAU*min | Height<br>mAU  | Relative Area<br>% | Relative Height<br>% | Amount<br>n.a. |
|---------------|-----------|-----------------------|-----------------|----------------|--------------------|----------------------|----------------|
| 1             |           | 8.863                 | 1.693           | 7.541          | 3.53               | 4.76                 | n.a.           |
| 2             |           | 11.527                | 46.237          | 150.980        | 96.47              | 95.24                | n.a.           |
| <b>Total:</b> |           |                       | <b>47.929</b>   | <b>158.522</b> | <b>100.00</b>      | <b>100.00</b>        |                |

2q: IE, *i*-PrOH/hexane = 30/70,  $v = 1.0$  mL/min,  $\lambda = 254$  nm

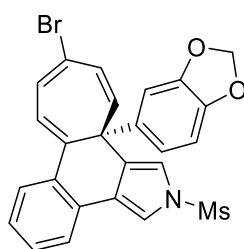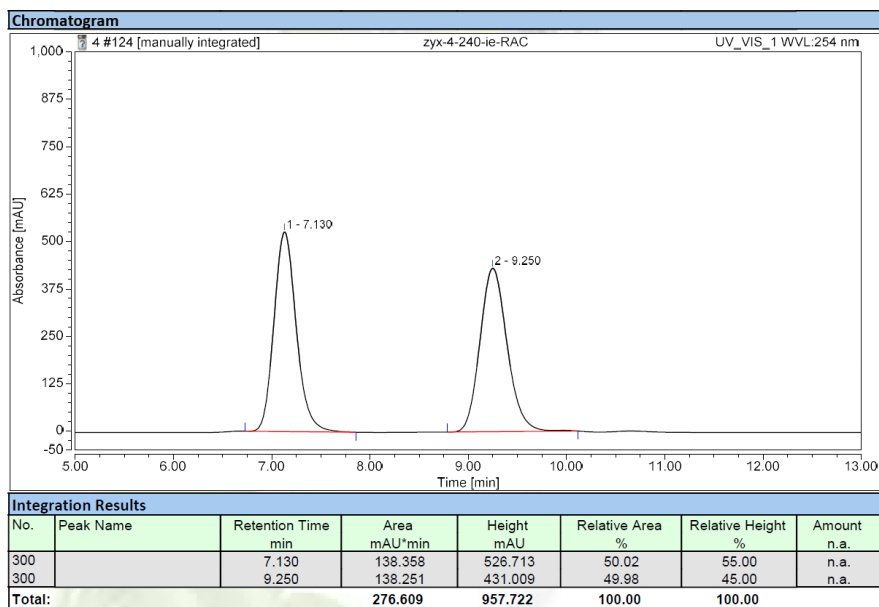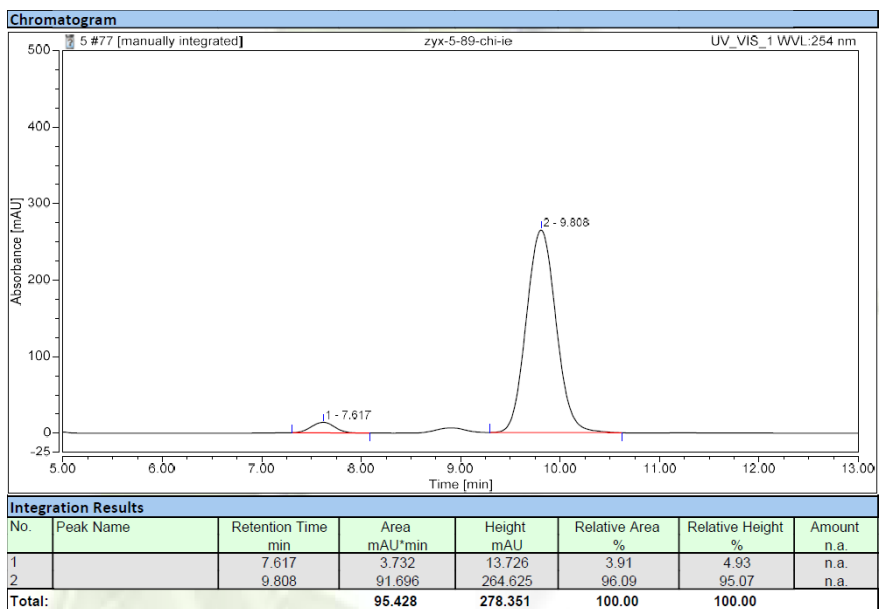

2r: IE, *i*-PrOH/hexane = 50/50,  $v = 1.0$  mL/min,  $\lambda = 254$  nm

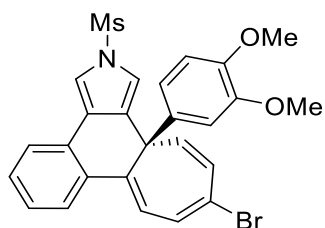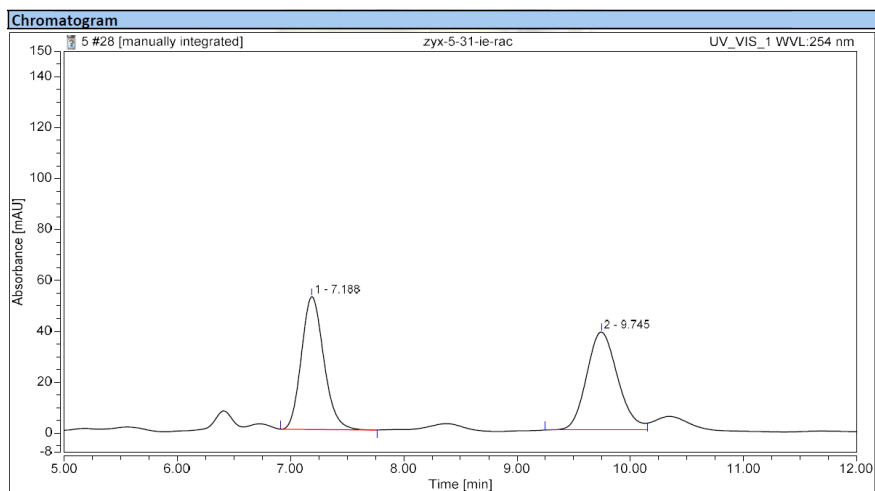

**Integration Results**

| No.           | Peak Name | Retention Time<br>min | Area<br>mAU*min | Height<br>mAU | Relative Area<br>% | Relative Height<br>% | Amount<br>n.a. |
|---------------|-----------|-----------------------|-----------------|---------------|--------------------|----------------------|----------------|
| 1             |           | 7.188                 | 11.952          | 52.176        | 49.31              | 57.55                | n.a.           |
| 2             |           | 9.745                 | 12.285          | 38.480        | 50.69              | 42.45                | n.a.           |
| <b>Total:</b> |           |                       | <b>24.237</b>   | <b>90.657</b> | <b>100.00</b>      | <b>100.00</b>        |                |

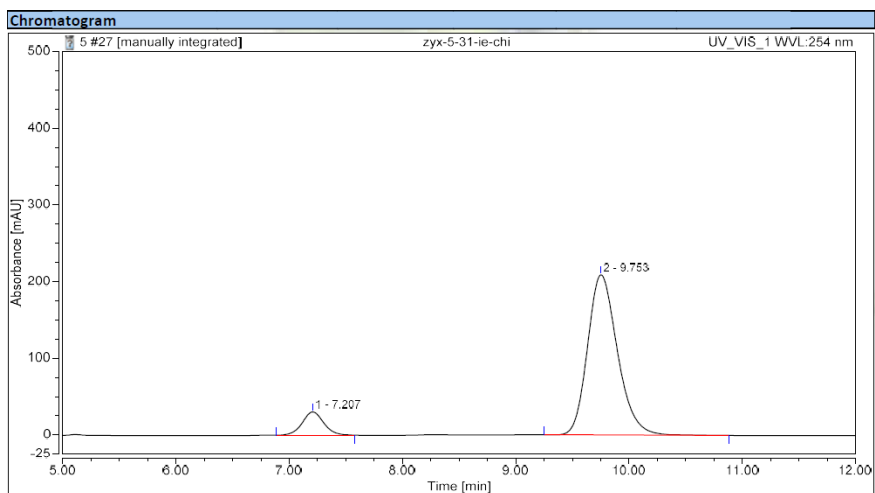

**Integration Results**

| No.           | Peak Name | Retention Time<br>min | Area<br>mAU*min | Height<br>mAU  | Relative Area<br>% | Relative Height<br>% | Amount<br>n.a. |
|---------------|-----------|-----------------------|-----------------|----------------|--------------------|----------------------|----------------|
| 1             |           | 7.207                 | 6.701           | 30.411         | 9.50               | 12.71                | n.a.           |
| 2             |           | 9.753                 | 63.870          | 208.926        | 90.50              | 87.29                | n.a.           |
| <b>Total:</b> |           |                       | <b>70.572</b>   | <b>239.337</b> | <b>100.00</b>      | <b>100.00</b>        |                |

2s: IE, *i*-PrOH/hexane = 20/80,  $v = 1.0$  mL/min,  $\lambda = 254$  nm

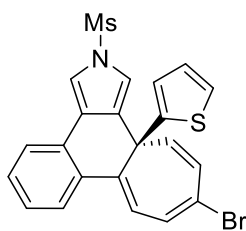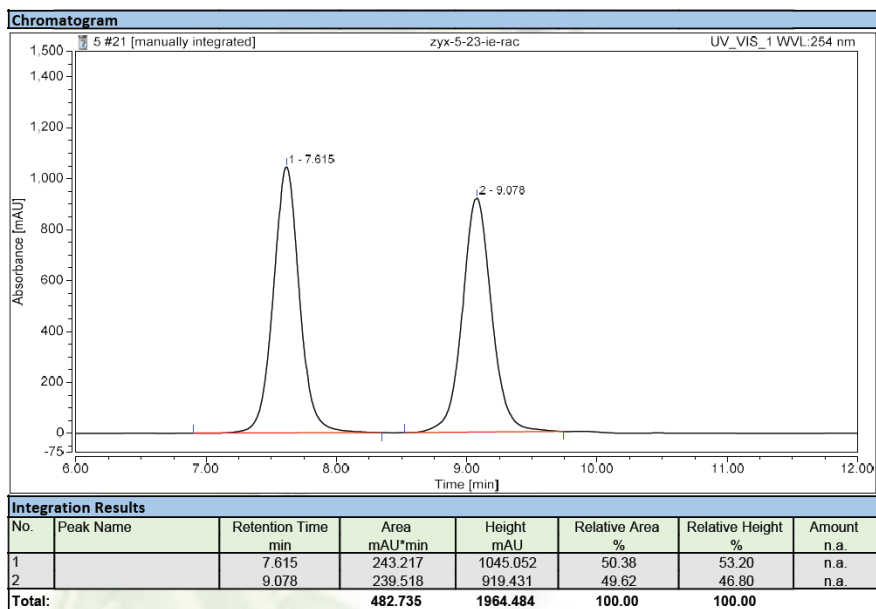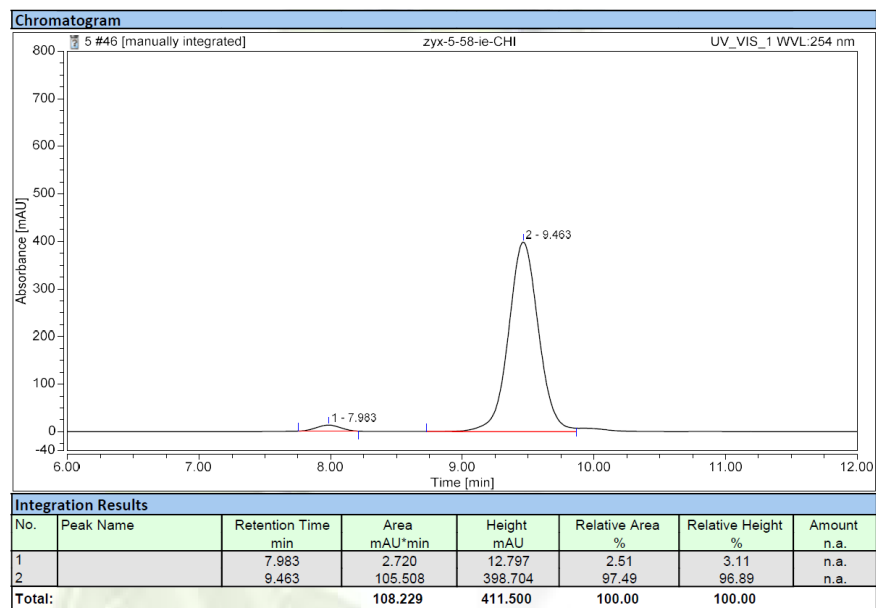



2t: IE, *i*-PrOH/hexane = 20/80,  $v = 1.0$  mL/min,  $\lambda = 254$  nm

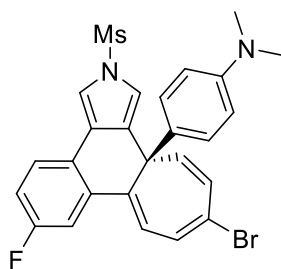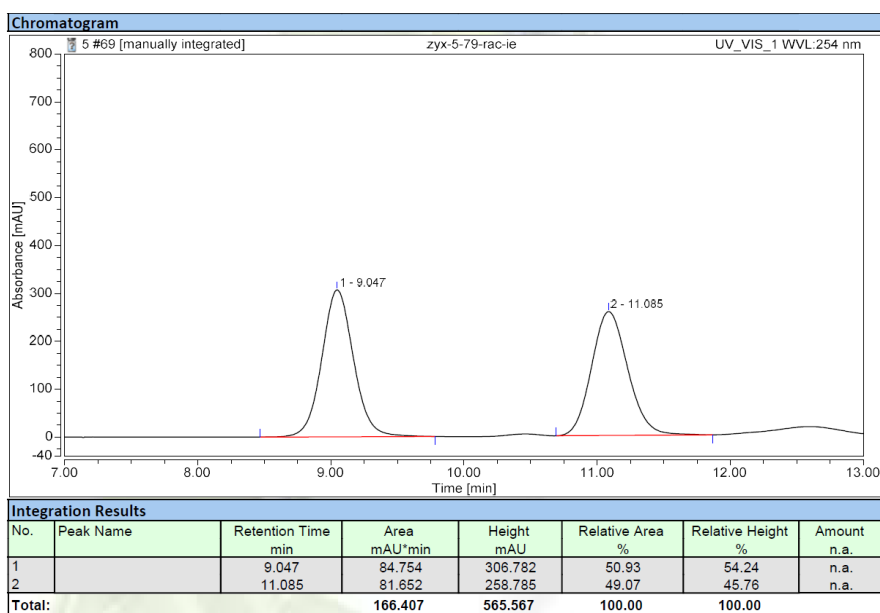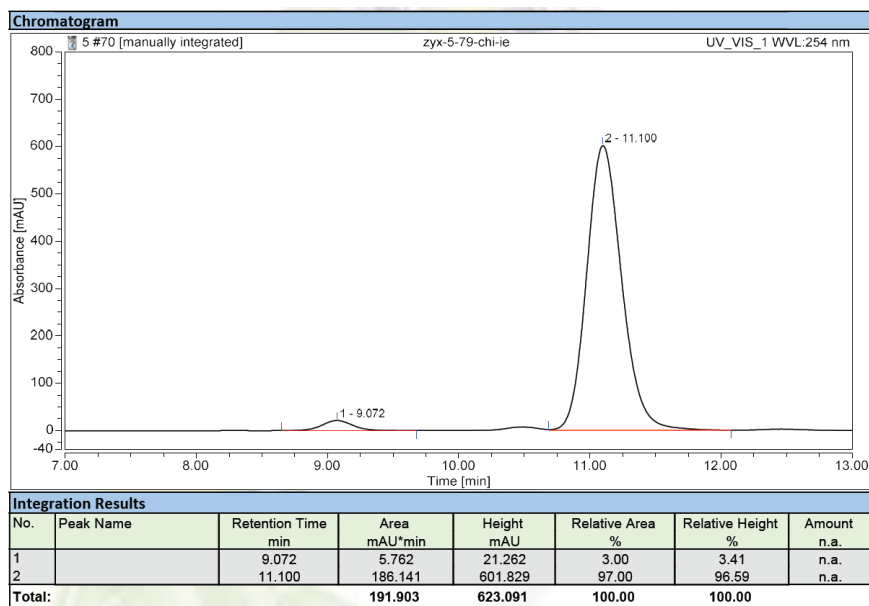

2u: IE, *i*-PrOH/hexane = 20/80,  $v = 1.0$  mL/min,  $\lambda = 254$  nm

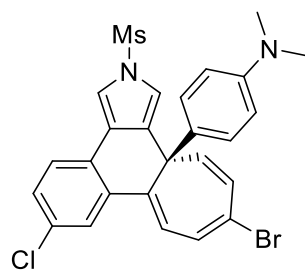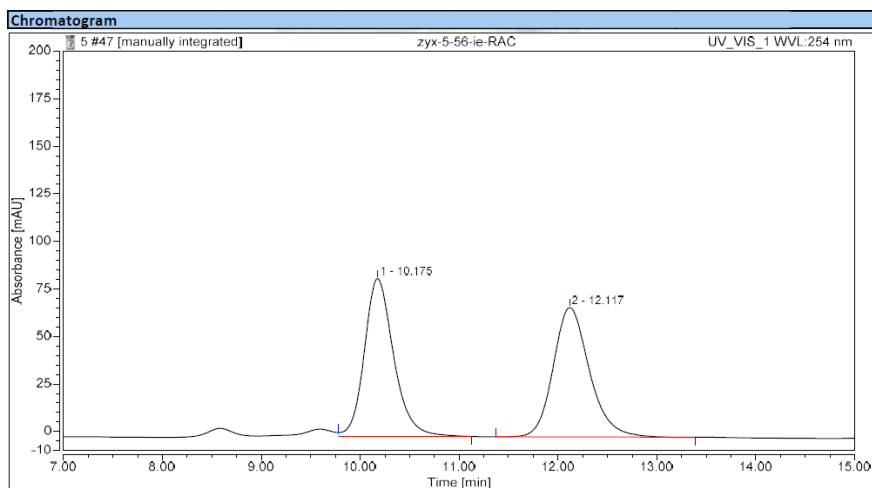

**Integration Results**

| No.           | Peak Name | Retention Time min | Area mAU*min  | Height mAU     | Relative Area % | Relative Height % | Amount n.a. |
|---------------|-----------|--------------------|---------------|----------------|-----------------|-------------------|-------------|
| 1             |           | 10.175             | 28.639        | 83.116         | 49.77           | 54.96             | n.a.        |
| 2             |           | 12.117             | 28.904        | 68.123         | 50.23           | 45.04             | n.a.        |
| <b>Total:</b> |           |                    | <b>57.543</b> | <b>151.238</b> | <b>100.00</b>   | <b>100.00</b>     |             |

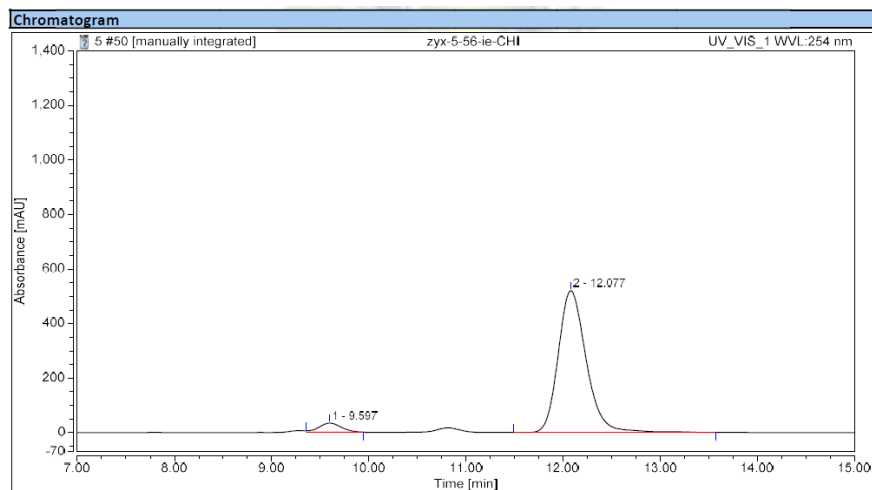

**Integration Results**

| No.           | Peak Name | Retention Time min | Area mAU*min   | Height mAU     | Relative Area % | Relative Height % | Amount n.a. |
|---------------|-----------|--------------------|----------------|----------------|-----------------|-------------------|-------------|
| 1             |           | 9.597              | 8.999          | 33.366         | 4.91            | 6.03              | n.a.        |
| 2             |           | 12.077             | 174.159        | 520.299        | 95.09           | 93.97             | n.a.        |
| <b>Total:</b> |           |                    | <b>183.159</b> | <b>553.665</b> | <b>100.00</b>   | <b>100.00</b>     |             |

2v: IE, *i*-PrOH/hexane = 20/80,  $v = 1.0$  mL/min,  $\lambda = 254$  nm

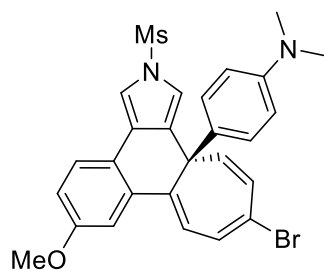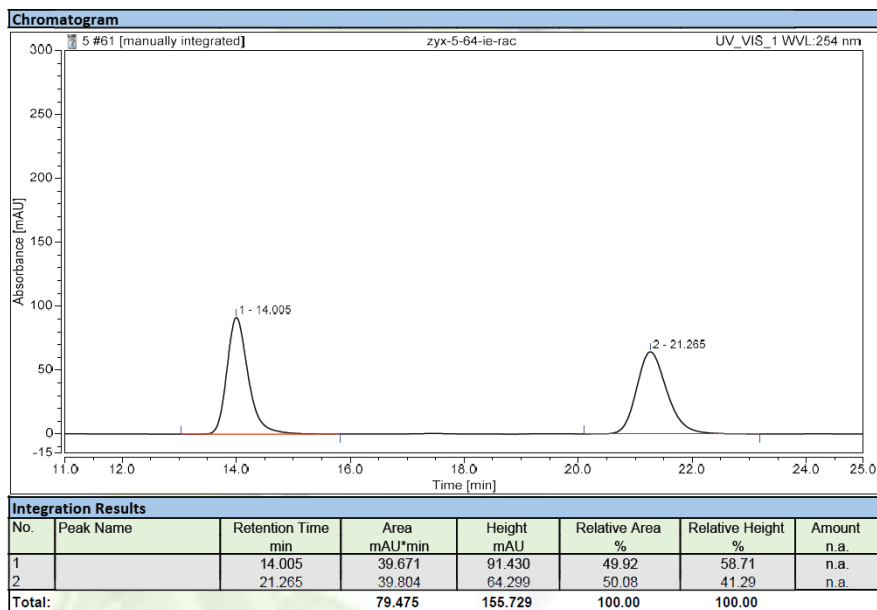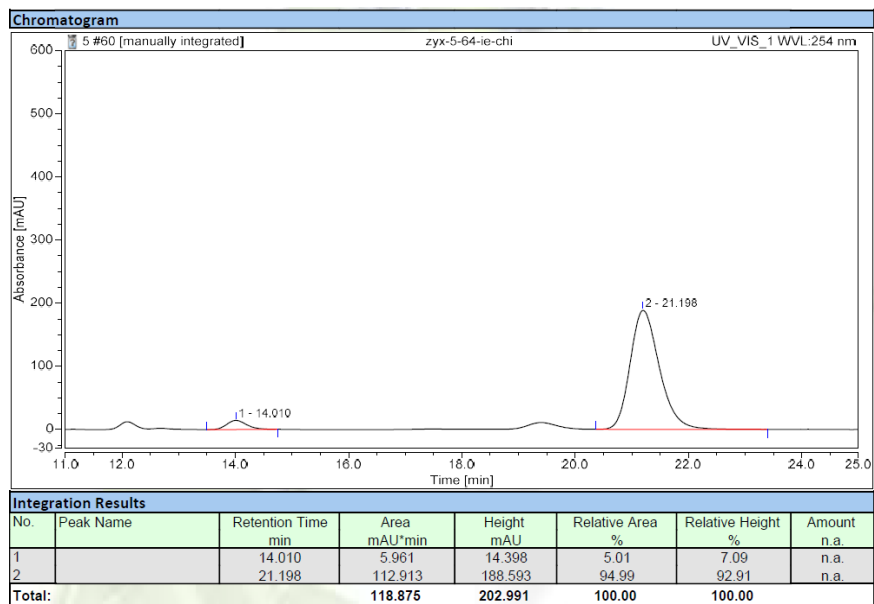

2w: **IE**, *i*-PrOH/hexane = 20/80,  $v = 1.0$  mL/min,  $\lambda = 254$  nm

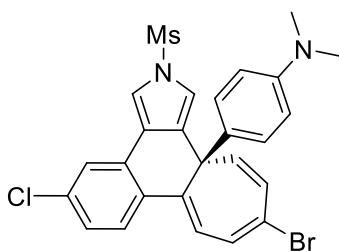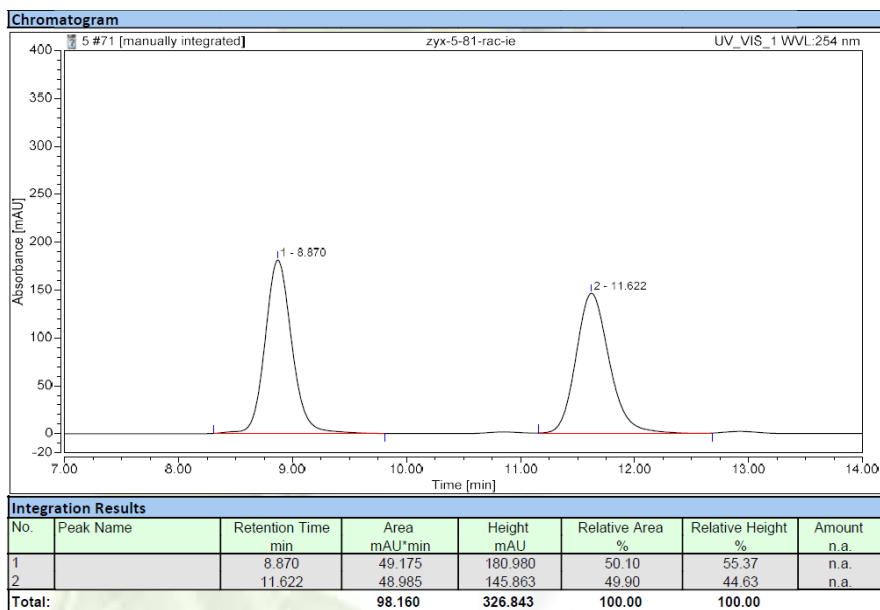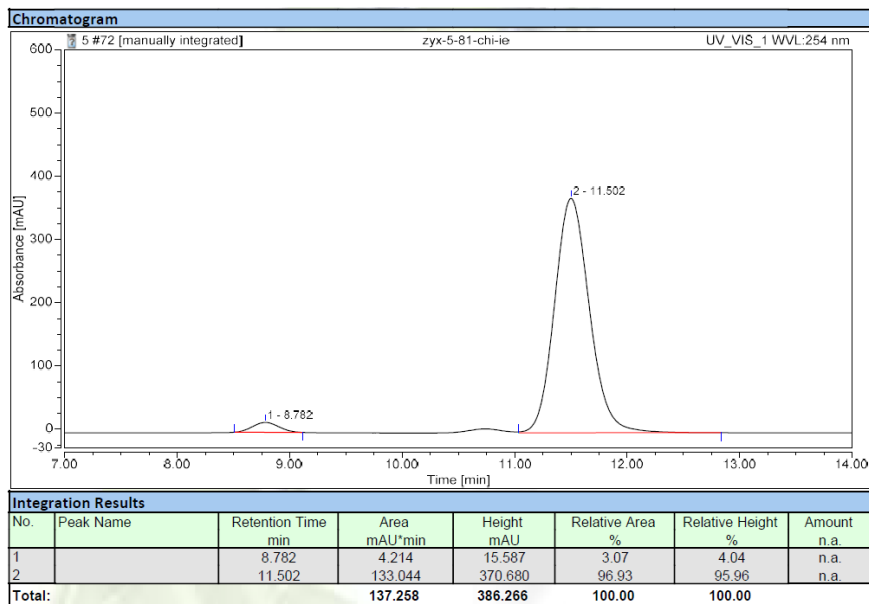

2x: IE, *i*-PrOH/hexane = 20/80,  $v = 1.0$  mL/min,  $\lambda = 254$  nm

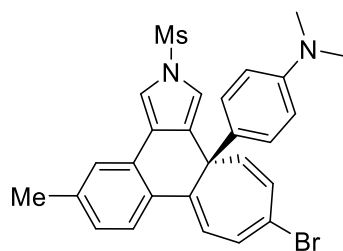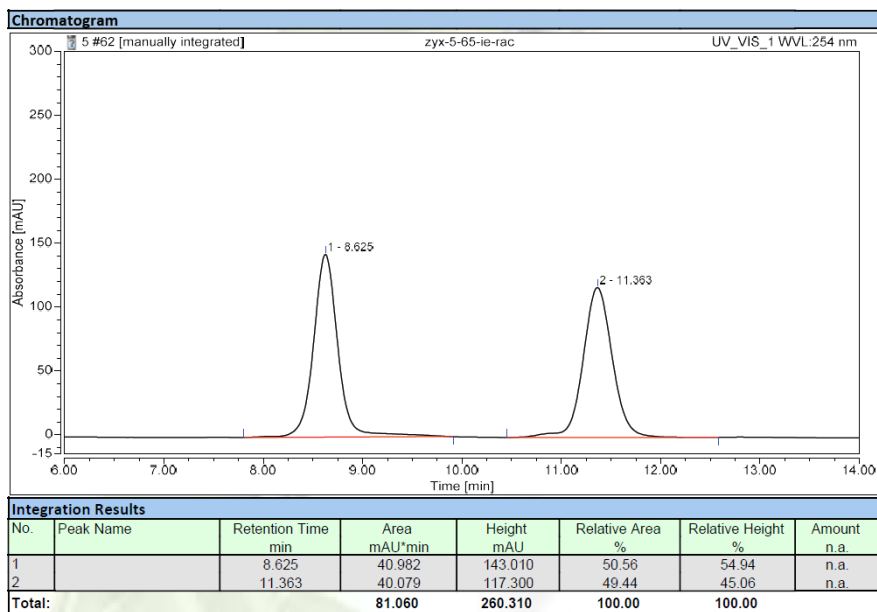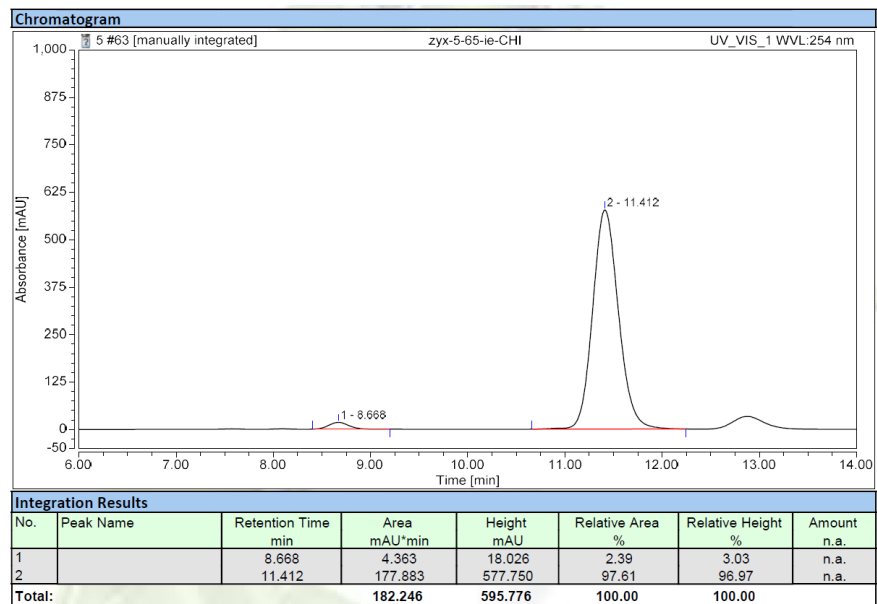

2y: IE, *i*-PrOH/hexane = 40/60,  $v = 1.0$  mL/min,  $\lambda = 254$  nm

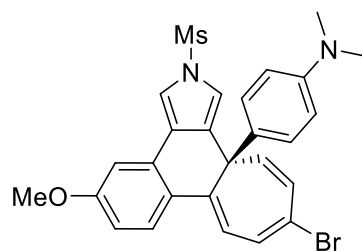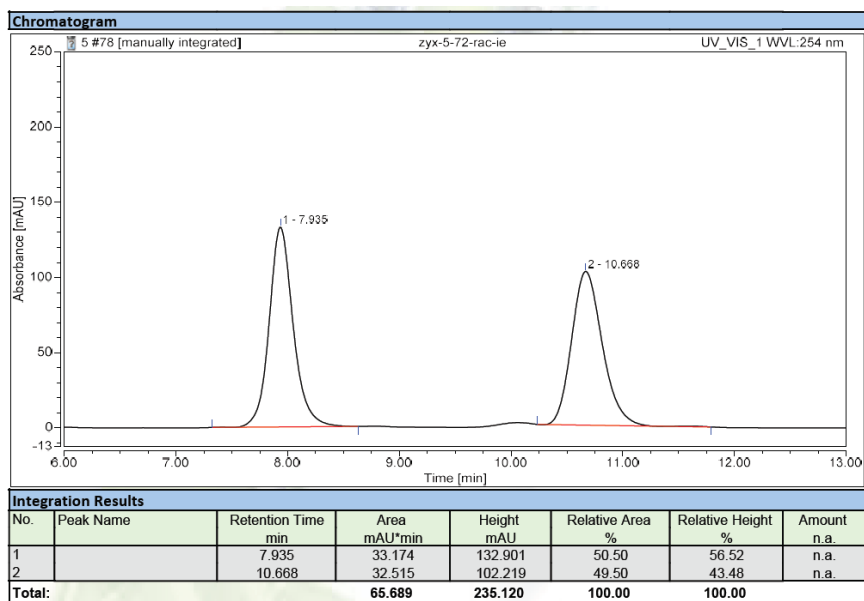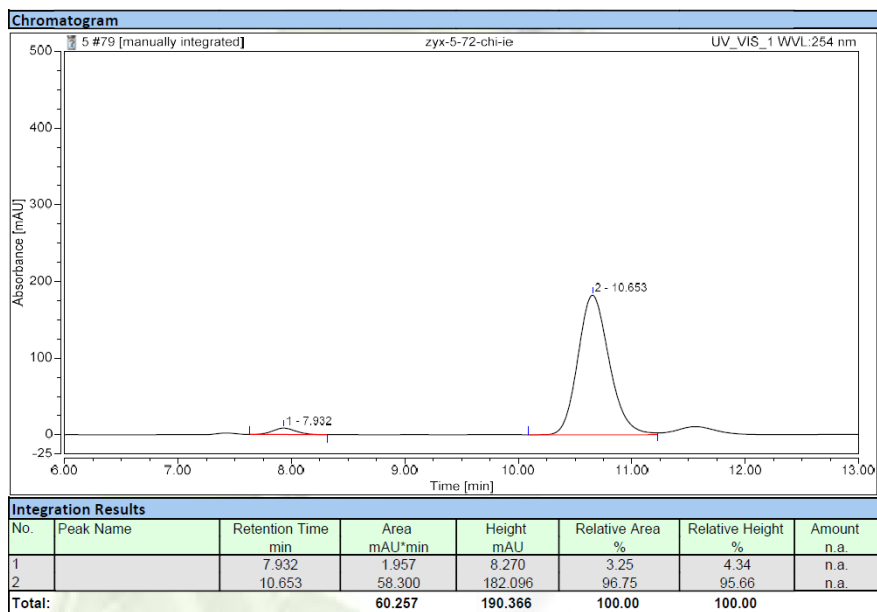

**2z: IE**, *i*-PrOH/hexane = 20/80,  $v = 1.0$  mL/min,  $\lambda = 254$  nm

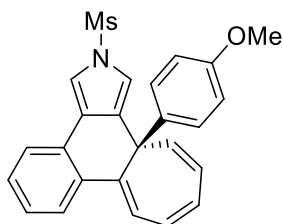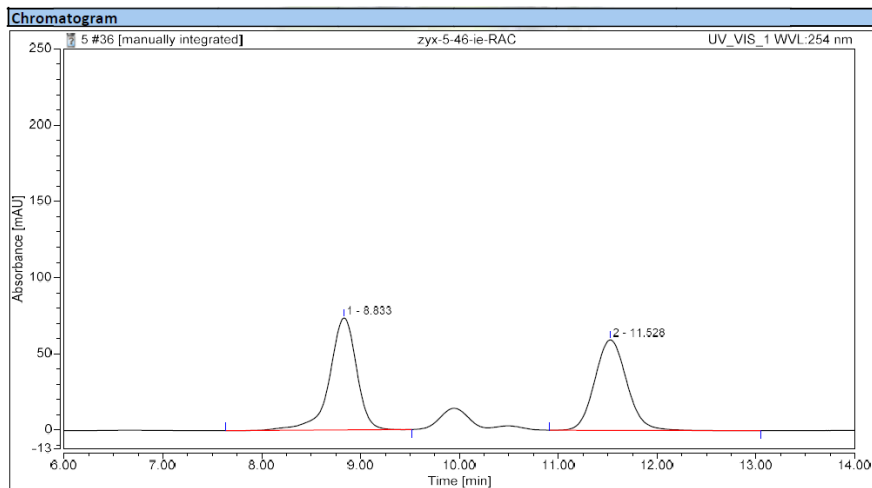

**Integration Results**

| No.           | Peak Name | Retention Time<br>min | Area<br>mAU*min | Height<br>mAU  | Relative Area<br>% | Relative Height<br>% | Amount<br>n.a. |
|---------------|-----------|-----------------------|-----------------|----------------|--------------------|----------------------|----------------|
| 1             |           | 8.833                 | 23.372          | 73.414         | 51.27              | 55.31                | n.a.           |
| 2             |           | 11.528                | 22.214          | 59.328         | 48.73              | 44.69                | n.a.           |
| <b>Total:</b> |           |                       | <b>45.586</b>   | <b>132.742</b> | <b>100.00</b>      | <b>100.00</b>        |                |

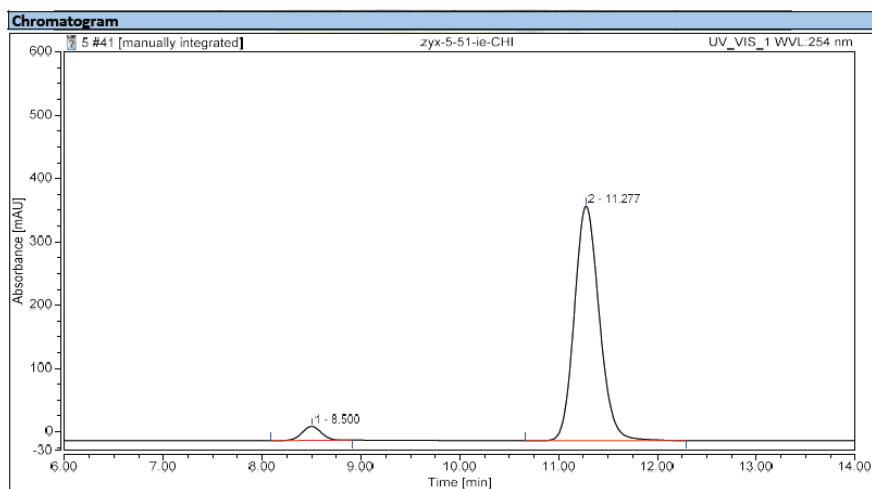

**Integration Results**

| No.           | Peak Name | Retention Time<br>min | Area<br>mAU*min | Height<br>mAU  | Relative Area<br>% | Relative Height<br>% | Amount<br>n.a. |
|---------------|-----------|-----------------------|-----------------|----------------|--------------------|----------------------|----------------|
| 1             |           | 8.500                 | 4.995           | 22.120         | 4.42               | 5.63                 | n.a.           |
| 2             |           | 11.277                | 108.107         | 370.871        | 95.58              | 94.37                | n.a.           |
| <b>Total:</b> |           |                       | <b>113.103</b>  | <b>392.992</b> | <b>100.00</b>      | <b>100.00</b>        |                |

2aa: IE, *i*-PrOH/hexane = 20/80,  $v = 1.0$  mL/min,  $\lambda = 254$  nm

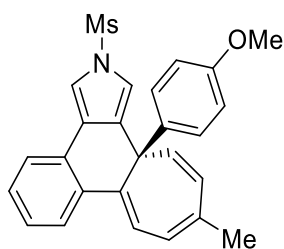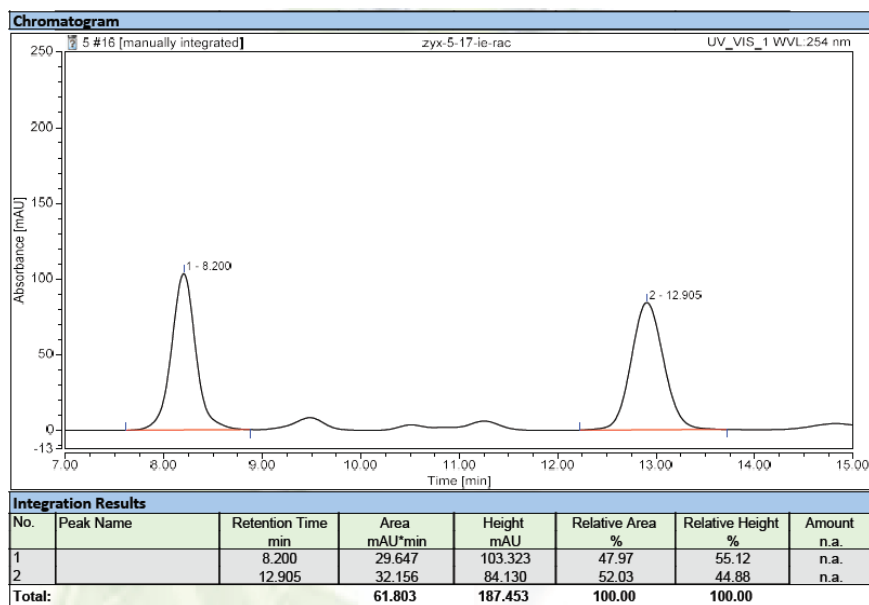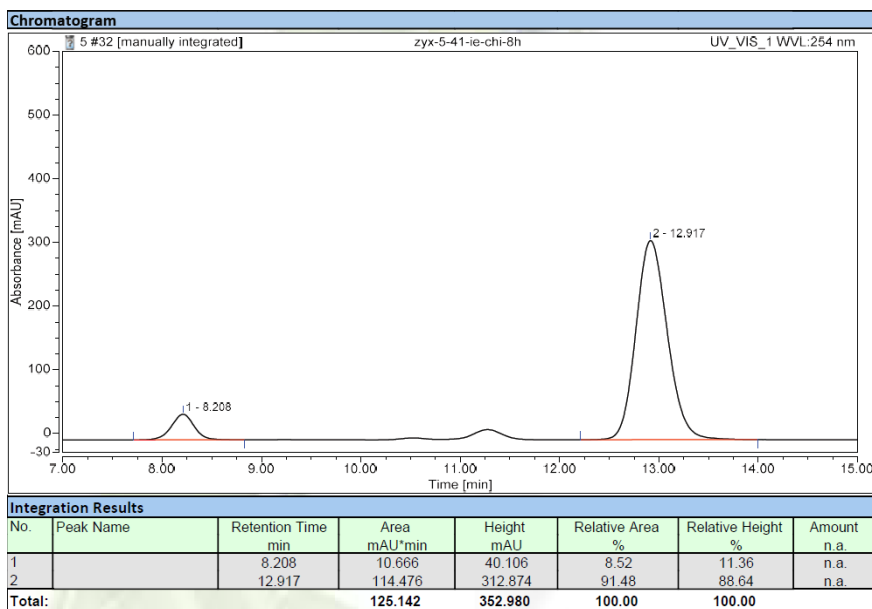



**2ab: IE**, *i*-PrOH/hexane = 20/80,  $v = 1.0$  mL/min,  $\lambda = 254$  nm

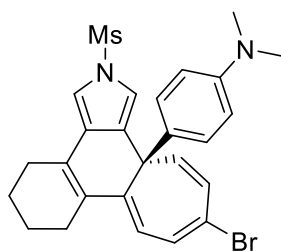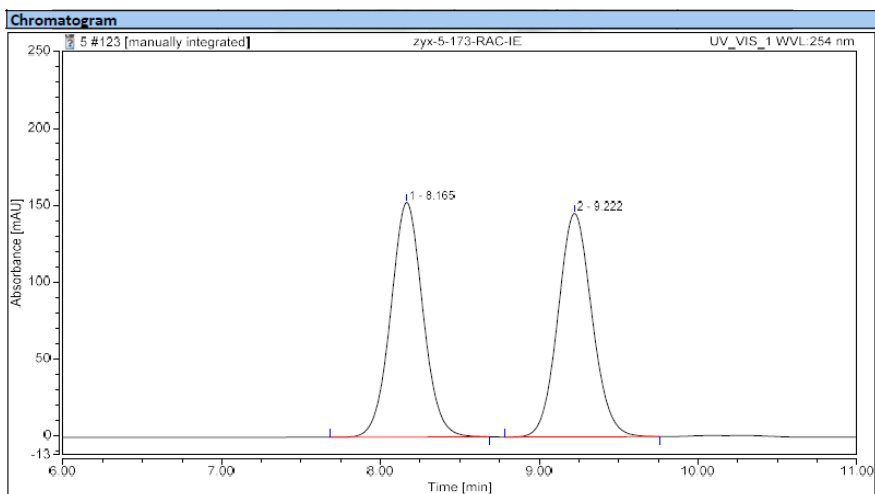

**Integration Results**

| No.           | Peak Name | Retention Time<br>min | Area<br>mAU*min | Height<br>mAU  | Relative Area<br>% | Relative Height<br>% | Amount<br>n.a. |
|---------------|-----------|-----------------------|-----------------|----------------|--------------------|----------------------|----------------|
| 1             |           | 8.165                 | 35.915          | 152.566        | 49.82              | 51.20                | n.a.           |
| 2             |           | 9.222                 | 36.179          | 145.386        | 50.18              | 48.80                | n.a.           |
| <b>Total:</b> |           |                       | <b>72.095</b>   | <b>297.952</b> | <b>100.00</b>      | <b>100.00</b>        |                |

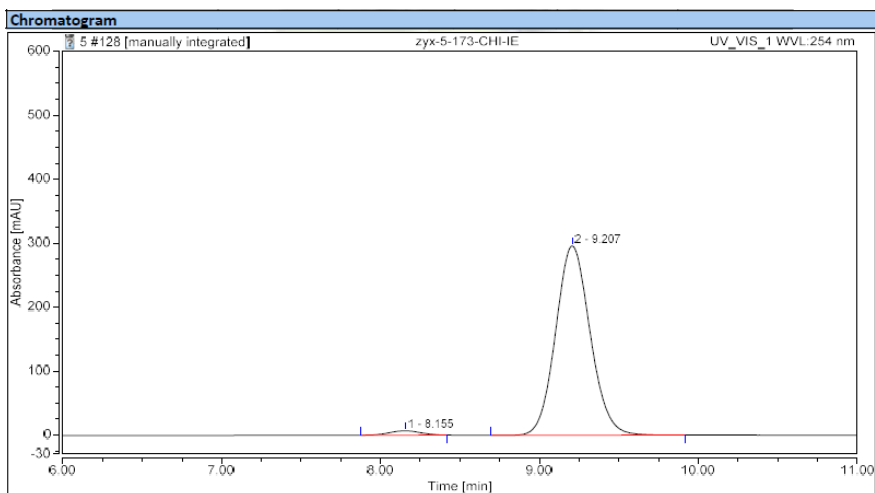

**Integration Results**

| No.           | Peak Name | Retention Time<br>min | Area<br>mAU*min | Height<br>mAU  | Relative Area<br>% | Relative Height<br>% | Amount<br>n.a. |
|---------------|-----------|-----------------------|-----------------|----------------|--------------------|----------------------|----------------|
| 1             |           | 8.155                 | 1.539           | 6.793          | 2.02               | 2.24                 | n.a.           |
| 2             |           | 9.207                 | 74.620          | 296.200        | 97.98              | 97.76                | n.a.           |
| <b>Total:</b> |           |                       | <b>76.159</b>   | <b>302.994</b> | <b>100.00</b>      | <b>100.00</b>        |                |

2ac: IE, *i*-PrOH/hexane = 30/70,  $v = 1.0$  mL/min,  $\lambda = 254$  nm

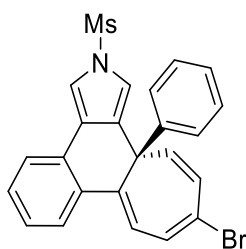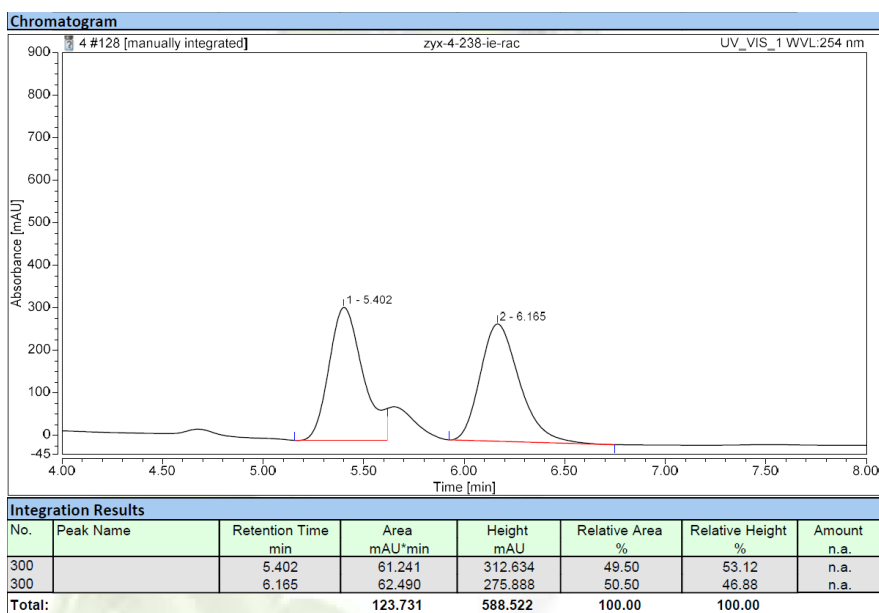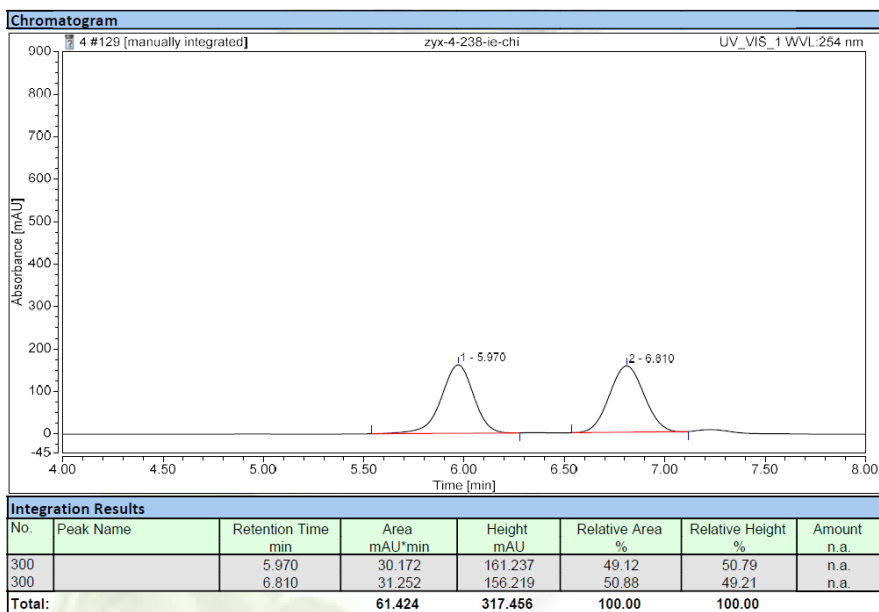

2ad: IE, *i*-PrOH/hexane = 30/70,  $v = 1.0 \text{ mL/min}$ ,  $\lambda = 254 \text{ nm}$

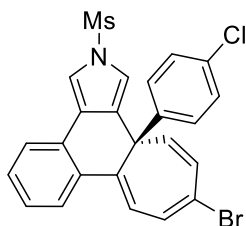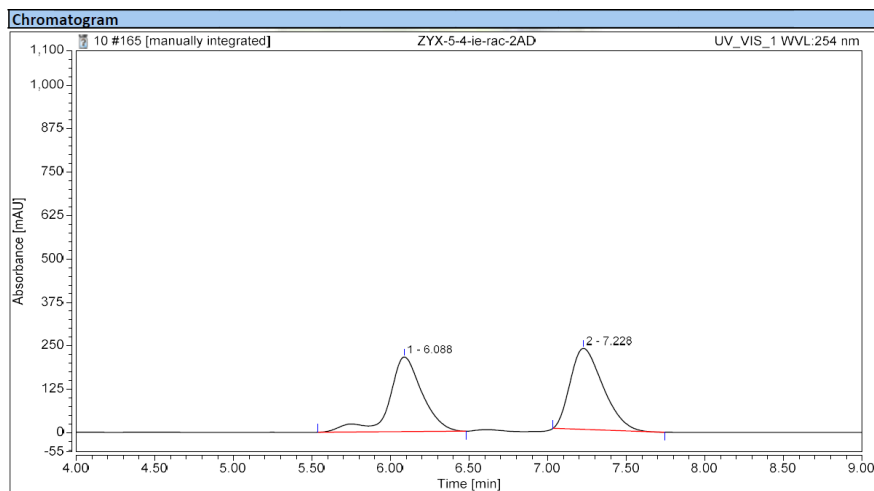

**Integration Results**

| No.           | Peak Name | Retention Time<br>min | Area<br>mAU*min | Height<br>mAU  | Relative Area<br>% | Relative Height<br>% | Amount<br>n.a. |
|---------------|-----------|-----------------------|-----------------|----------------|--------------------|----------------------|----------------|
| 1             |           | 6.088                 | 53.001          | 215.187        | 48.40              | 47.98                | n.a.           |
| 2             |           | 7.228                 | 56.515          | 233.310        | 51.60              | 52.02                | n.a.           |
| <b>Total:</b> |           |                       | <b>109.516</b>  | <b>448.496</b> | <b>100.00</b>      | <b>100.00</b>        |                |

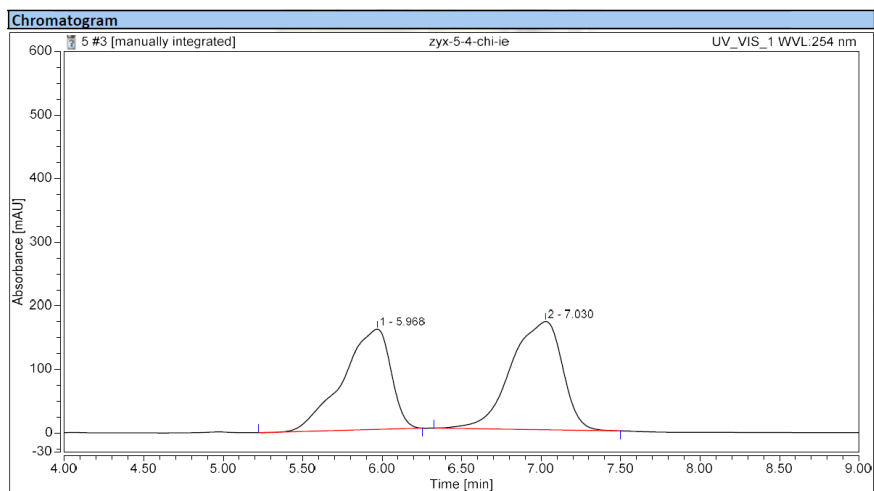

**Integration Results**

| No.           | Peak Name | Retention Time<br>min | Area<br>mAU*min | Height<br>mAU  | Relative Area<br>% | Relative Height<br>% | Amount<br>n.a. |
|---------------|-----------|-----------------------|-----------------|----------------|--------------------|----------------------|----------------|
| 1             |           | 5.968                 | 55.267          | 157.683        | 46.44              | 48.09                | n.a.           |
| 2             |           | 7.030                 | 63.747          | 170.185        | 53.56              | 51.91                | n.a.           |
| <b>Total:</b> |           |                       | <b>119.014</b>  | <b>327.867</b> | <b>100.00</b>      | <b>100.00</b>        |                |

2af: IE, *i*-PrOH/hexane = 20/80,  $v = 1.0$  mL/min,  $\lambda = 254$  nm

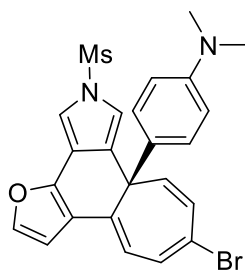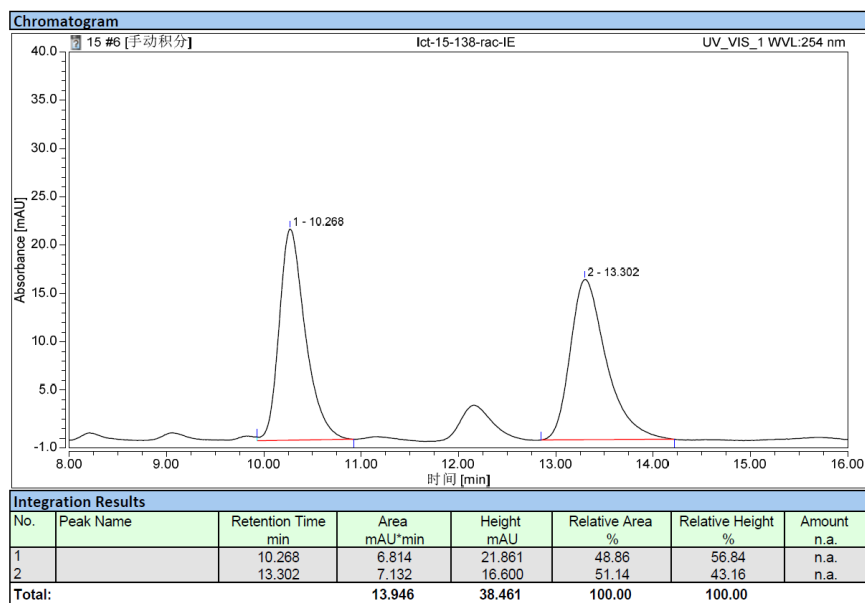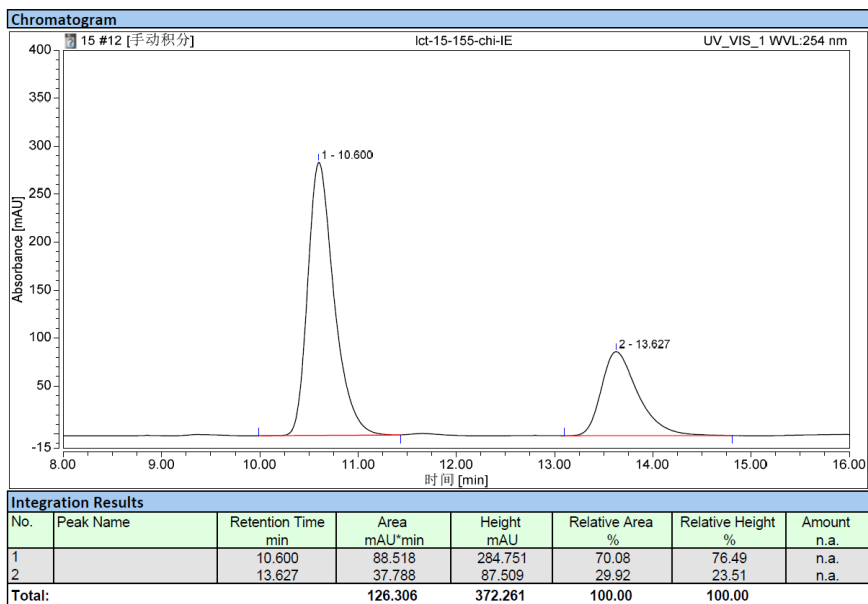

**2ag: IG, *i*-PrOH/hexane = 30/70,  $v = 1.0 \text{ mL/min}$ ,  $\lambda = 254 \text{ nm}$**

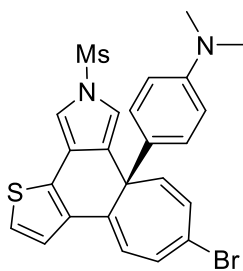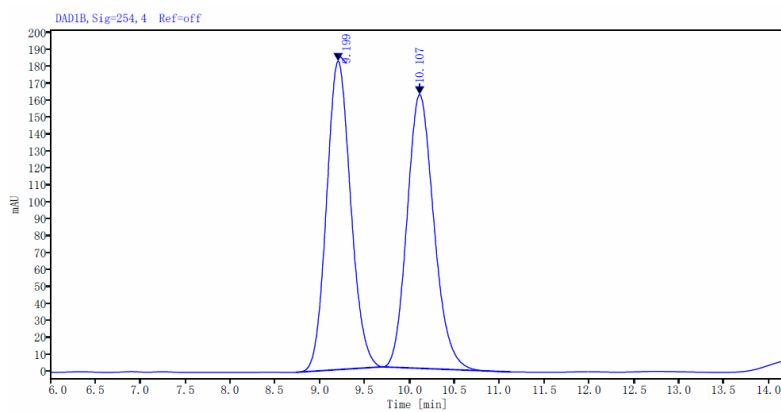

Signal: DAD1B, Sig=254,4 Ref=off

| RetTime [min] | Type | Width [min] | Area [mAU*s] | Height [mAU] | Area %   |
|---------------|------|-------------|--------------|--------------|----------|
| 9.19914       | MM m | 0.95776     | 3403.74389   | 182.44536    | 50.28081 |
| 10.10705      | MM m | 1.43665     | 3365.72520   | 161.96147    | 49.71919 |
| Totals:       |      |             | 6769.46910   |              |          |

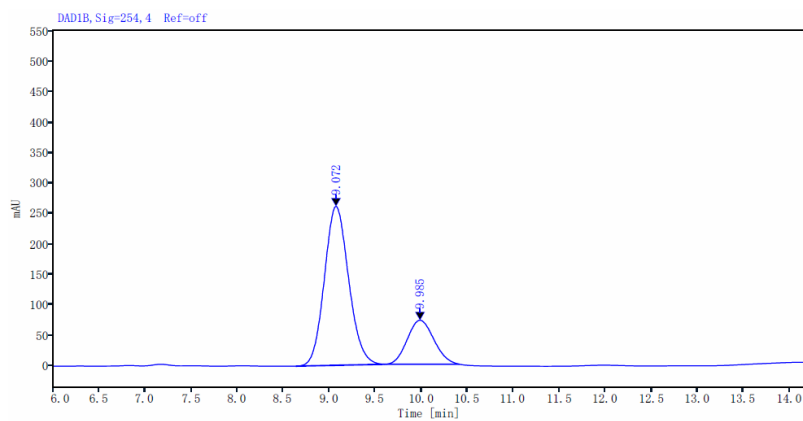

Signal: DAD1B, Sig=254,4 Ref=off

| RetTime [min] | Type | Width [min] | Area [mAU*s] | Height [mAU] | Area %   |
|---------------|------|-------------|--------------|--------------|----------|
| 9.07241       | MM m | 0.95768     | 4790.90021   | 261.58068    | 76.66412 |
| 9.98471       | MM m | 0.82087     | 1458.30785   | 72.45797     | 23.33588 |
| Totals:       |      |             | 6249.20806   |              |          |

**2ah: IA**, *i*-PrOH/hexane = 10/90,  $v = 1.0$  mL/min,  $\lambda = 254$  nm

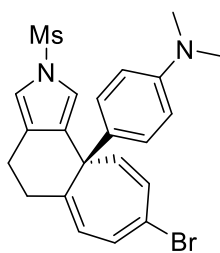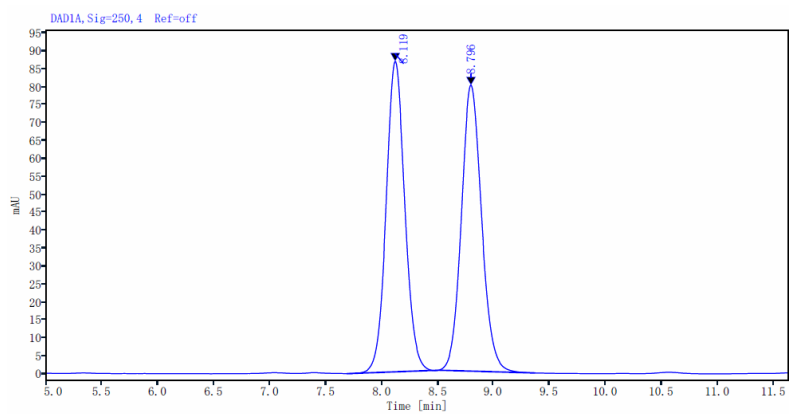

Signal: DADIA, Sig=250,4 Ref=off

| RetTime [min] | Type | Width [min] | Area [mAU*s] | Height [mAU] | Area %   |
|---------------|------|-------------|--------------|--------------|----------|
| 8.11936       | MM m | 0.82076     | 1003.91123   | 86.54497     | 50.01778 |
| 8.79639       | MM m | 0.86180     | 1003.19758   | 79.70568     | 49.98222 |
| Totals:       |      |             | 2007.10881   |              |          |

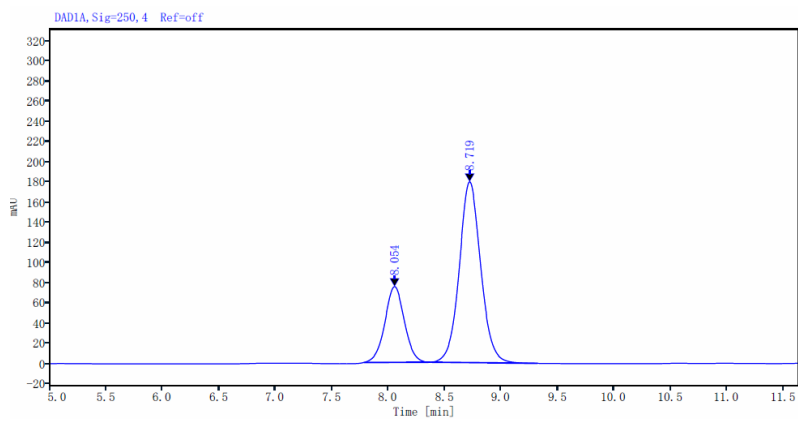

Signal: DADIA, Sig=250,4 Ref=off

| RetTime [min] | Type | Width [min] | Area [mAU*s] | Height [mAU] | Area %   |
|---------------|------|-------------|--------------|--------------|----------|
| 8.05378       | MM m | 0.59505     | 899.76919    | 75.03049     | 27.55930 |
| 8.71902       | MM m | 0.94387     | 2365.07872   | 179.07686    | 72.44070 |
| Totals:       |      |             | 3264.84791   |              |          |

2ai: IA, *i*-PrOH/hexane = 10/90,  $v = 1.0$  mL/min,  $\lambda = 254$  nm

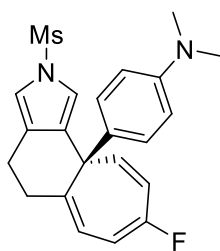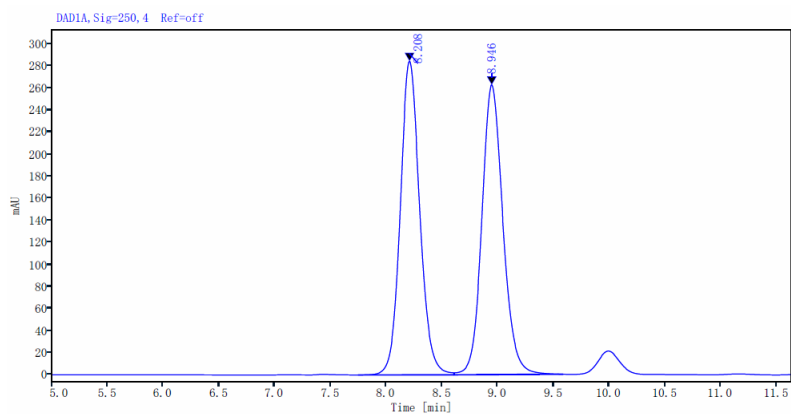

Signal: DAD1A, Sig=250, 4 Ref=off

| RetTime [min] | Type | Width [min] | Area [mAU*s] | Height [mAU] | Area %   |
|---------------|------|-------------|--------------|--------------|----------|
| 8.20804       | BV   | 0.86117     | 3451.06344   | 284.45718    | 49.96208 |
| 8.94551       | MM m | 0.97841     | 3456.30132   | 262.77674    | 50.03792 |
| Totals:       |      |             | 6907.36476   |              |          |

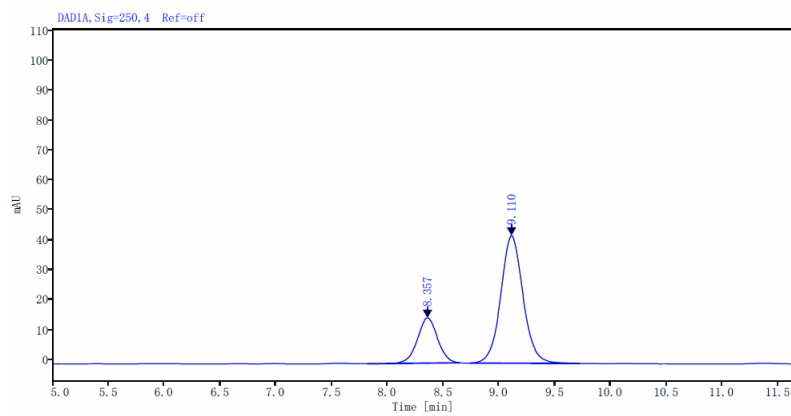

Signal: DAD1A, Sig=250, 4 Ref=off

| RetTime [min] | Type | Width [min] | Area [mAU*s] | Height [mAU] | Area %   |
|---------------|------|-------------|--------------|--------------|----------|
| 8.35653       | MM m | 0.82861     | 189.60513    | 15.12916     | 24.19183 |
| 9.10991       | MM m | 0.98491     | 594.15166    | 42.69410     | 75.80817 |
| Totals:       |      |             | 783.75679    |              |          |

4a: IC, *i*-PrOH/hexane = 20/80,  $v = 1.0$  mL/min,  $\lambda = 254$  nm

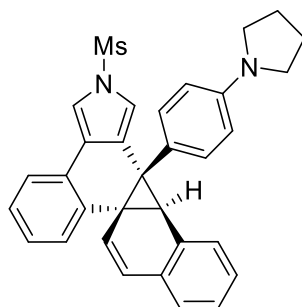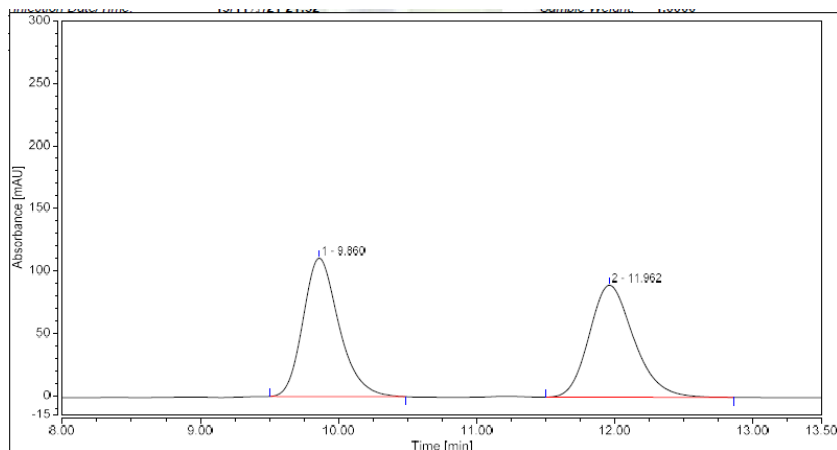

| Integration Results |           |                       |                 |               |                    |                      |                |
|---------------------|-----------|-----------------------|-----------------|---------------|--------------------|----------------------|----------------|
| No.                 | Peak Name | Retention Time<br>min | Area<br>mAU*min | Height<br>mAU | Relative Area<br>% | Relative Height<br>% | Amount<br>n.a. |
| 1                   |           | 9.860                 | 33.493          | 110.665       | 49.99              | 55.28                | n.a.           |
| 2                   |           | 11.962                | 33.506          | 89.515        | 50.01              | 44.72                | n.a.           |
| Total:              |           |                       | 66.999          | 200.180       | 100.00             | 100.00               |                |

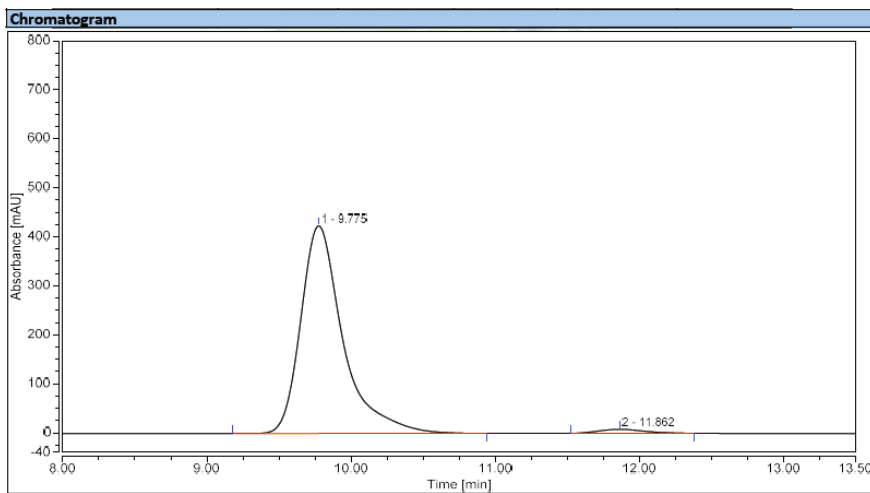

| Integration Results |           |                       |                 |               |                    |                      |                |
|---------------------|-----------|-----------------------|-----------------|---------------|--------------------|----------------------|----------------|
| No.                 | Peak Name | Retention Time<br>min | Area<br>mAU*min | Height<br>mAU | Relative Area<br>% | Relative Height<br>% | Amount<br>n.a. |
| 1                   |           | 9.775                 | 142.777         | 423.290       | 98.00              | 98.14                | n.a.           |
| 2                   |           | 11.862                | 2.908           | 8.010         | 2.00               | 1.86                 | n.a.           |
| Total:              |           |                       | 145.685         | 431.300       | 100.00             | 100.00               |                |



4b: IC, *i*-PrOH/hexane = 10/90,  $v = 1.0$  mL/min,  $\lambda = 254$  nm

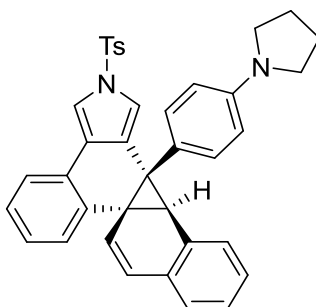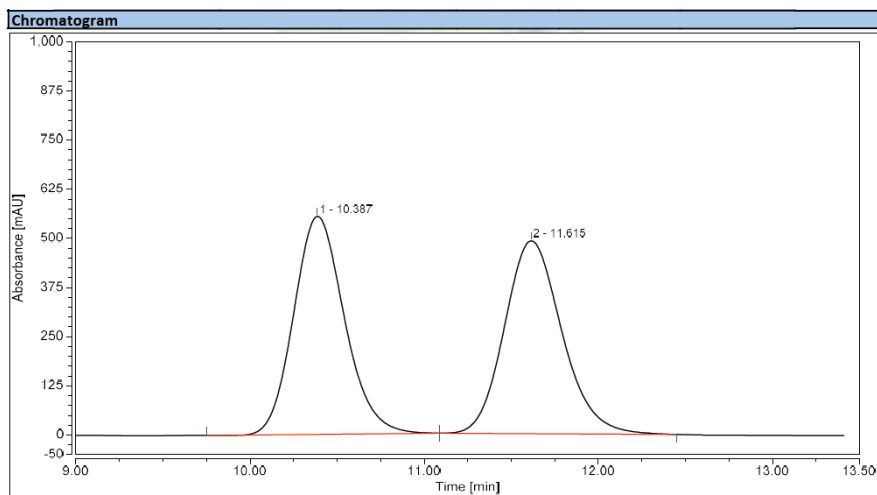

**Integration Results**

| No.           | Peak Name | Retention Time min | Area mAU*min   | Height mAU      | Relative Area % | Relative Height % | Amount |
|---------------|-----------|--------------------|----------------|-----------------|-----------------|-------------------|--------|
| 1             |           | 10.387             | 187.145        | 554.462         | 49.95           | 53.05             | n.a.   |
| 2             |           | 11.615             | 187.492        | 490.679         | 50.05           | 46.95             | n.a.   |
| <b>Total:</b> |           |                    | <b>374.637</b> | <b>1045.141</b> | <b>100.00</b>   | <b>100.00</b>     |        |

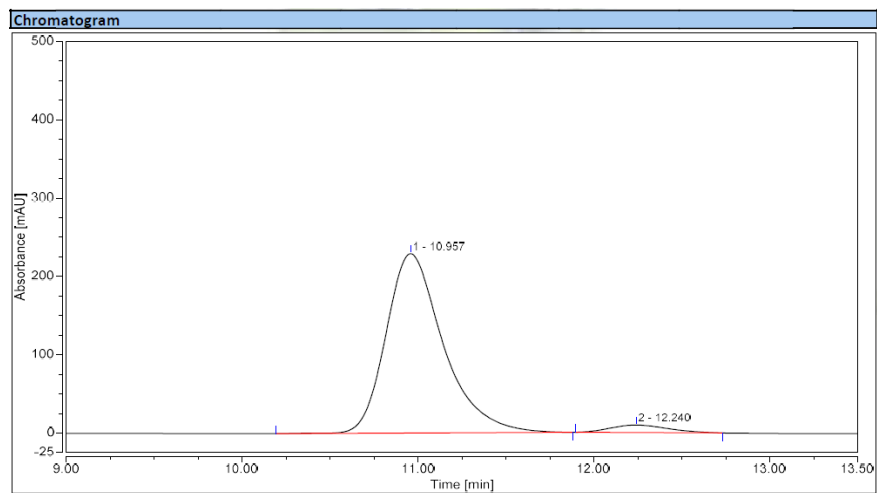

**Integration Results**

| No.           | Peak Name | Retention Time min | Area mAU*min  | Height mAU     | Relative Area % | Relative Height % | Amount |
|---------------|-----------|--------------------|---------------|----------------|-----------------|-------------------|--------|
| 1             |           | 10.957             | 86.473        | 229.046        | 96.01           | 95.99             | n.a.   |
| 2             |           | 12.240             | 3.595         | 9.560          | 3.99            | 4.01              | n.a.   |
| <b>Total:</b> |           |                    | <b>90.068</b> | <b>238.606</b> | <b>100.00</b>   | <b>100.00</b>     |        |

4c: IE, *i*-PrOH/hexane = 50/50,  $v = 1.0$  mL/min,  $\lambda = 254$  nm

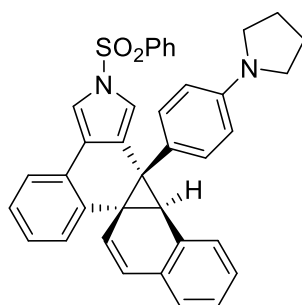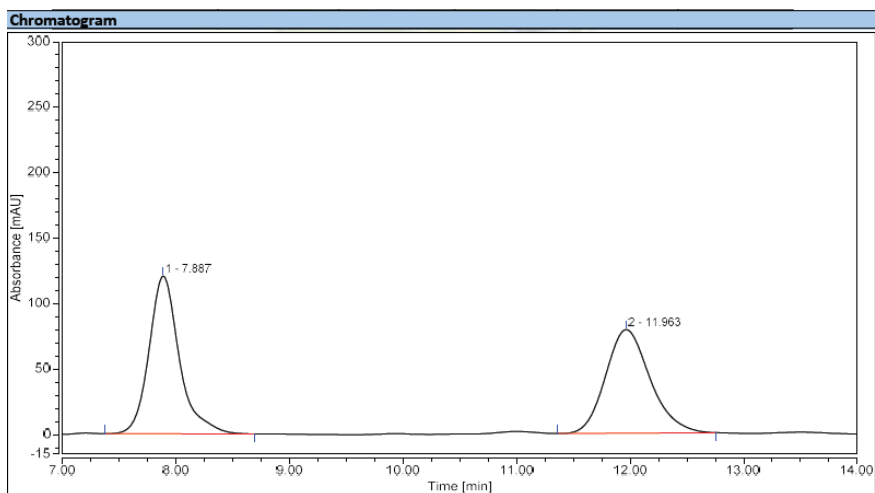

**Integration Results**

| No.           | Peak Name | Retention Time<br>min | Area<br>mAU*min | Height<br>mAU  | Relative Area<br>% | Relative Height<br>% | Amount |
|---------------|-----------|-----------------------|-----------------|----------------|--------------------|----------------------|--------|
| 1             |           | 7.887                 | 37.362          | 120.447        | 50.95              | 60.36                | n.a.   |
| 2             |           | 11.963                | 35.963          | 79.084         | 49.05              | 39.64                | n.a.   |
| <b>Total:</b> |           |                       | <b>73.325</b>   | <b>199.531</b> | <b>100.00</b>      | <b>100.00</b>        |        |

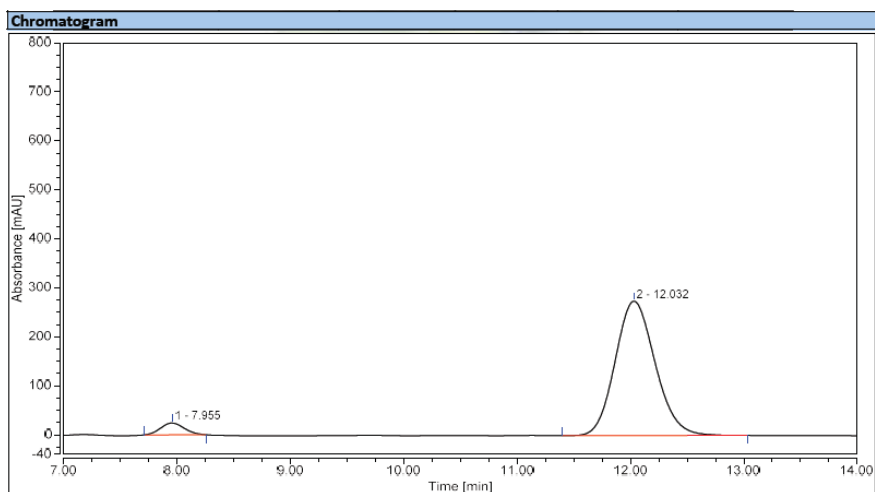

**Integration Results**

| No.           | Peak Name | Retention Time<br>min | Area<br>mAU*min | Height<br>mAU  | Relative Area<br>% | Relative Height<br>% | Amount |
|---------------|-----------|-----------------------|-----------------|----------------|--------------------|----------------------|--------|
| 1             |           | 7.955                 | 5.805           | 24.047         | 4.92               | 8.06                 | n.a.   |
| 2             |           | 12.032                | 112.126         | 274.127        | 95.08              | 91.94                | n.a.   |
| <b>Total:</b> |           |                       | <b>117.931</b>  | <b>298.174</b> | <b>100.00</b>      | <b>100.00</b>        |        |

4d: IG, *i*-PrOH/hexane = 50/50,  $v = 1.0$  mL/min,  $\lambda = 254$  nm

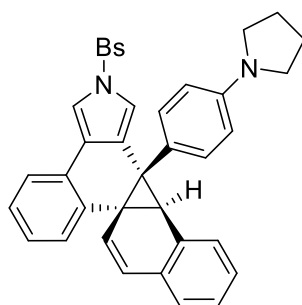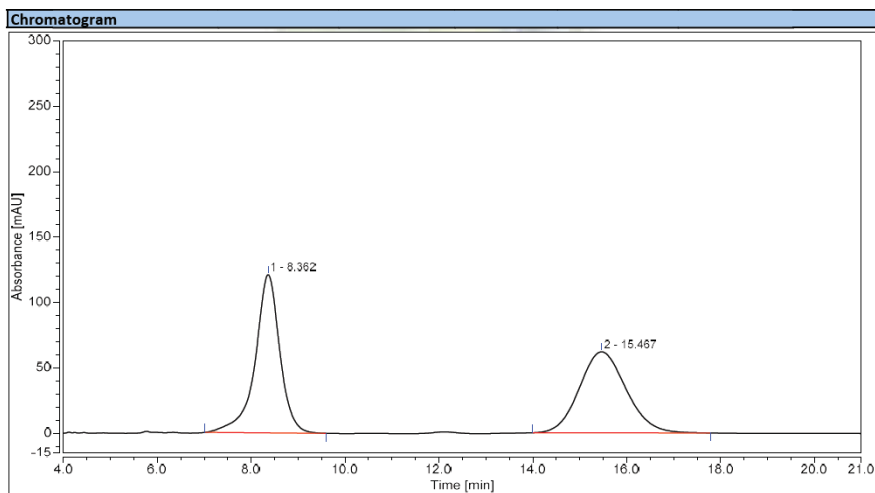

**Integration Results**

| No.           | Peak Name | Retention Time<br>min | Area<br>mAU*min | Height<br>mAU  | Relative Area<br>% | Relative Height<br>% | Amount<br>n.a. |
|---------------|-----------|-----------------------|-----------------|----------------|--------------------|----------------------|----------------|
| 1             |           | 8.362                 | 73.655          | 121.000        | 50.79              | 66.16                | n.a.           |
| 2             |           | 15.467                | 71.353          | 61.886         | 49.21              | 33.84                | n.a.           |
| <b>Total:</b> |           |                       | <b>145.008</b>  | <b>182.886</b> | <b>100.00</b>      | <b>100.00</b>        |                |

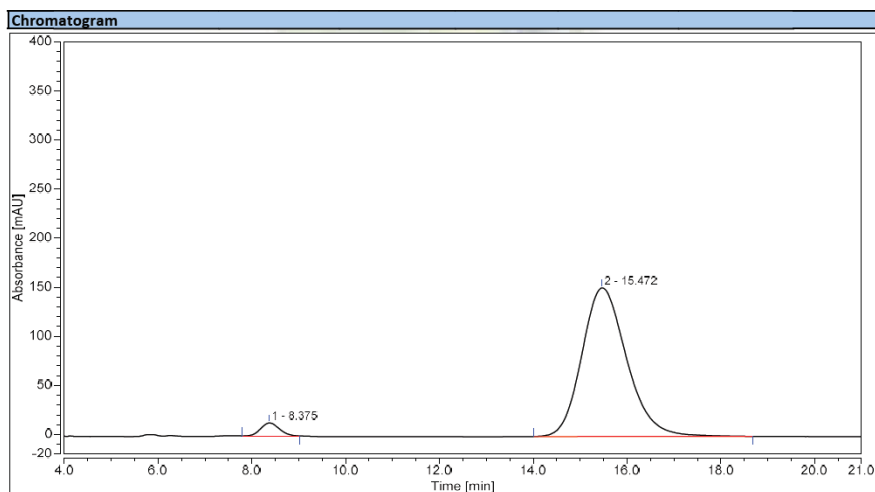

**Integration Results**

| No.           | Peak Name | Retention Time<br>min | Area<br>mAU*min | Height<br>mAU  | Relative Area<br>% | Relative Height<br>% | Amount<br>n.a. |
|---------------|-----------|-----------------------|-----------------|----------------|--------------------|----------------------|----------------|
| 1             |           | 8.375                 | 6.032           | 13.189         | 3.48               | 8.02                 | n.a.           |
| 2             |           | 15.472                | 167.167         | 151.321        | 96.52              | 91.98                | n.a.           |
| <b>Total:</b> |           |                       | <b>173.199</b>  | <b>164.510</b> | <b>100.00</b>      | <b>100.00</b>        |                |

4e: IC, *i*-PrOH/hexane = 20/80,  $v = 1.0$  mL/min,  $\lambda = 254$  nm

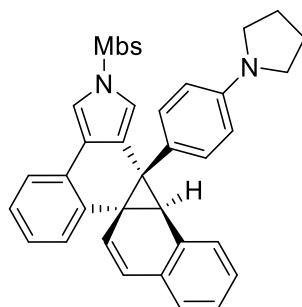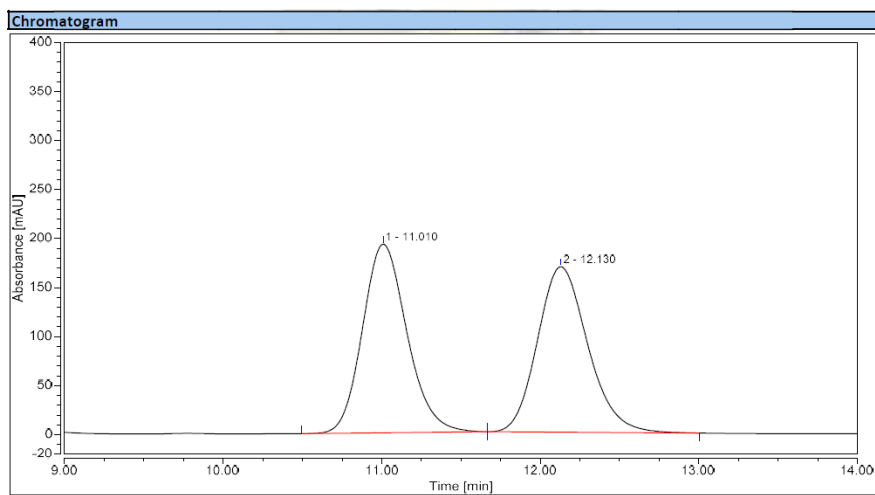

**Integration Results**

| No.           | Peak Name | Retention Time min | Area mAU*min   | Height mAU     | Relative Area % | Relative Height % | Amount |
|---------------|-----------|--------------------|----------------|----------------|-----------------|-------------------|--------|
| 1             |           | 11.010             | 62.572         | 192.531        | 50.21           | 53.27             | n.a.   |
| 2             |           | 12.130             | 62.049         | 168.862        | 49.79           | 46.73             | n.a.   |
| <b>Total:</b> |           |                    | <b>124.621</b> | <b>361.393</b> | <b>100.00</b>   | <b>100.00</b>     |        |

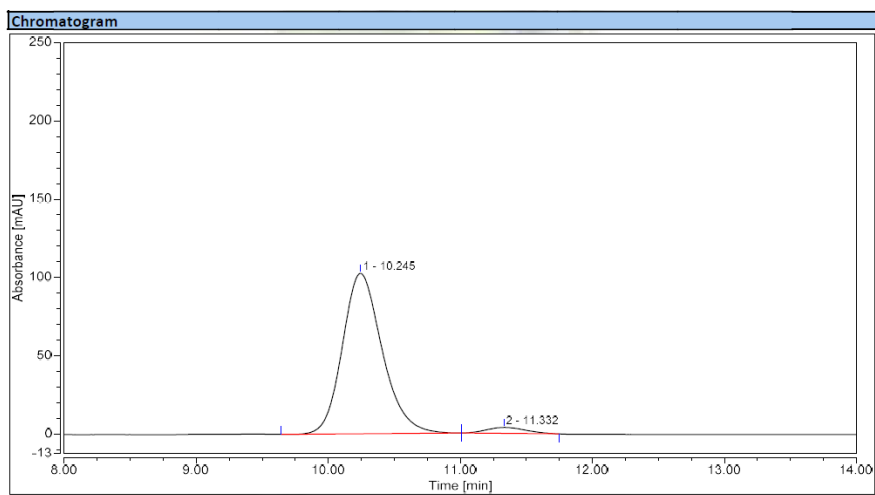

**Integration Results**

| No.           | Peak Name | Retention Time min | Area mAU*min  | Height mAU     | Relative Area % | Relative Height % | Amount |
|---------------|-----------|--------------------|---------------|----------------|-----------------|-------------------|--------|
| 1             |           | 10.245             | 35.770        | 102.488        | 96.47           | 96.43             | n.a.   |
| 2             |           | 11.332             | 1.309         | 3.796          | 3.53            | 3.57              | n.a.   |
| <b>Total:</b> |           |                    | <b>37.079</b> | <b>106.284</b> | <b>100.00</b>   | <b>100.00</b>     |        |

4f: IE, *i*-PrOH/hexane = 20/80,  $v = 1.0$  mL/min,  $\lambda = 254$  nm

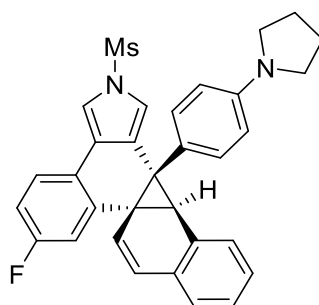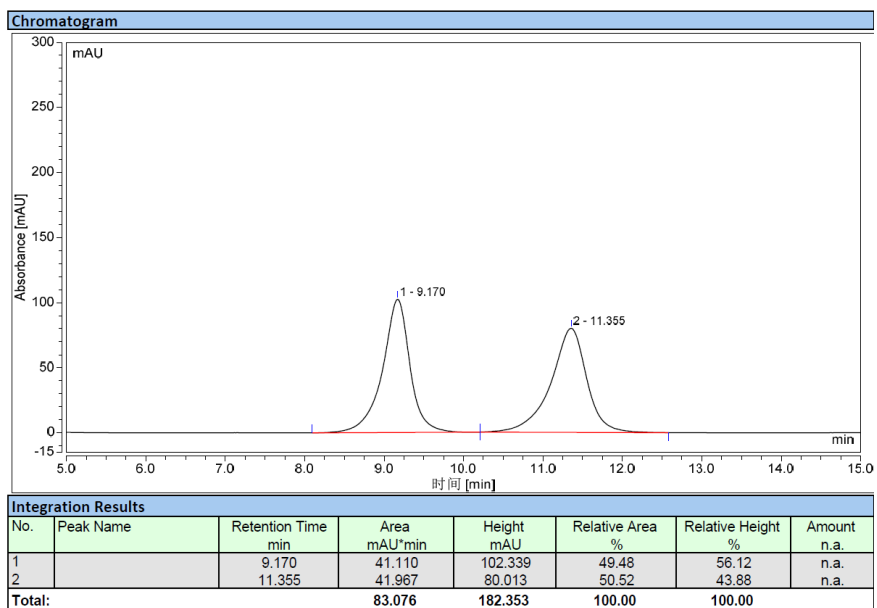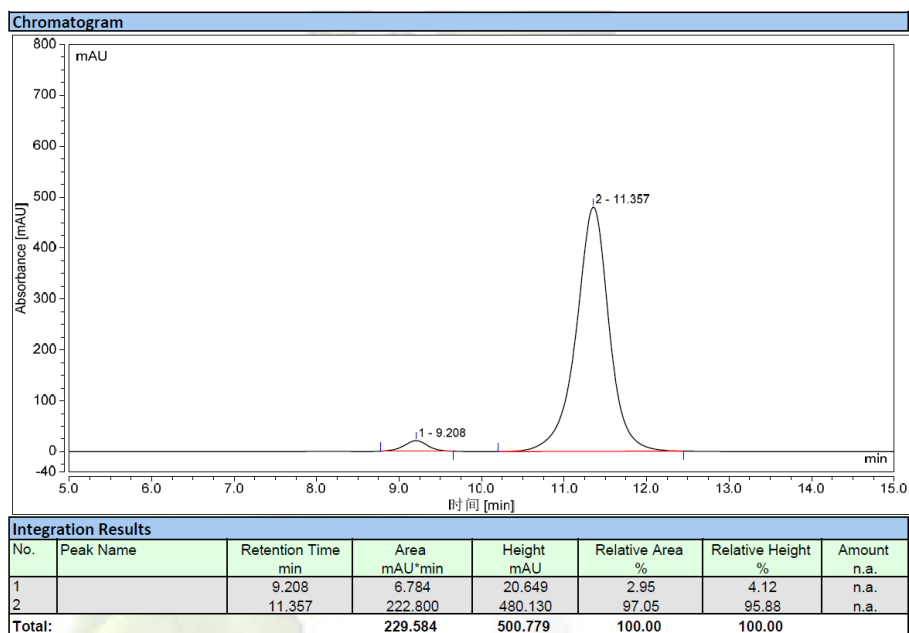

4g: IE, *i*-PrOH/hexane = 20/80,  $v = 1.0$  mL/min,  $\lambda = 254$  nm

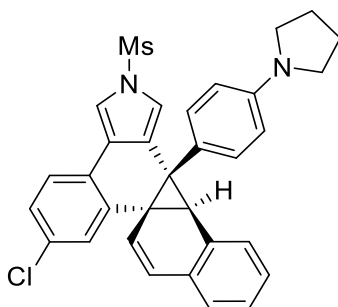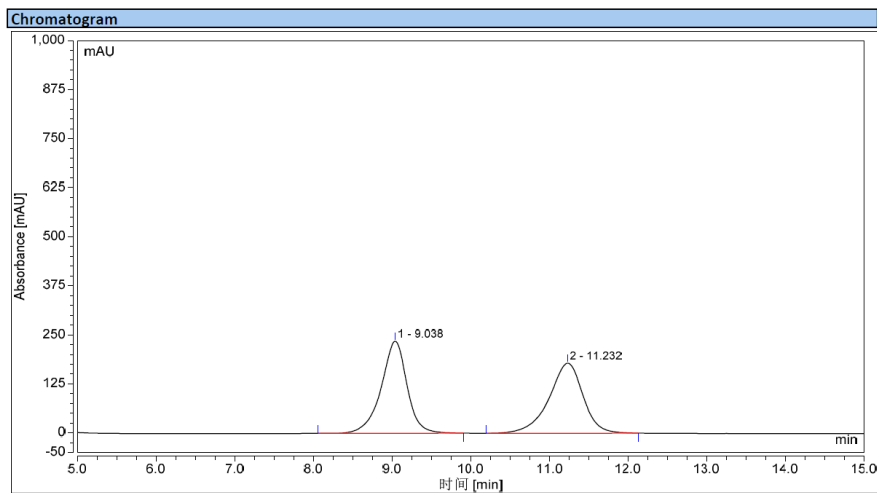

**Integration Results**

| No.           | Peak Name | Retention Time min | Area mAU*min   | Height mAU     | Relative Area % | Relative Height % | Amount n.a. |
|---------------|-----------|--------------------|----------------|----------------|-----------------|-------------------|-------------|
| 1             |           | 9.038              | 89.722         | 234.754        | 50.00           | 56.78             | n.a.        |
| 2             |           | 11.232             | 89.715         | 178.682        | 50.00           | 43.22             | n.a.        |
| <b>Total:</b> |           |                    | <b>179.437</b> | <b>413.437</b> | <b>100.00</b>   | <b>100.00</b>     |             |

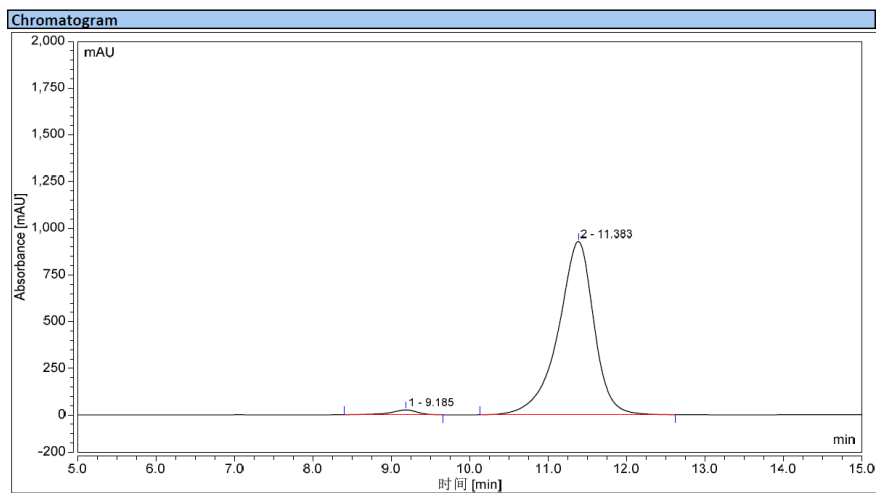

**Integration Results**

| No.           | Peak Name | Retention Time min | Area mAU*min   | Height mAU     | Relative Area % | Relative Height % | Amount n.a. |
|---------------|-----------|--------------------|----------------|----------------|-----------------|-------------------|-------------|
| 1             |           | 9.185              | 10.394         | 26.322         | 2.07            | 2.76              | n.a.        |
| 2             |           | 11.383             | 490.585        | 927.678        | 97.93           | 97.24             | n.a.        |
| <b>Total:</b> |           |                    | <b>500.979</b> | <b>954.000</b> | <b>100.00</b>   | <b>100.00</b>     |             |

4h: IA, *i*-PrOH/hexane = 20/80,  $v = 1.0 \text{ mL/min}$ ,  $\lambda = 254 \text{ nm}$

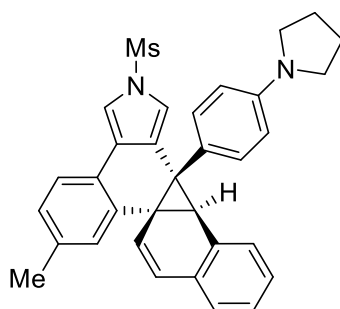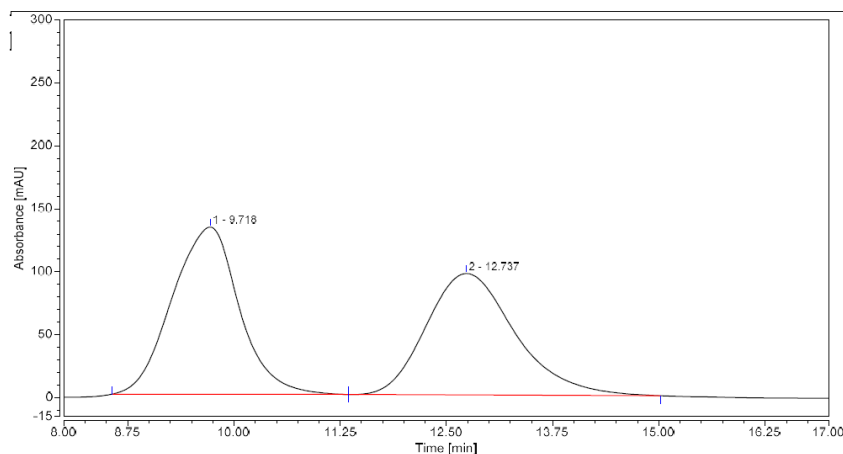

| Integration Results |           |                       |                 |               |                    |                      |                |
|---------------------|-----------|-----------------------|-----------------|---------------|--------------------|----------------------|----------------|
| No.                 | Peak Name | Retention Time<br>min | Area<br>mAU*min | Height<br>mAU | Relative Area<br>% | Relative Height<br>% | Amount<br>n.a. |
| 1                   |           | 9.718                 | 121.795         | 132.792       | 51.07              | 57.94                | n.a.           |
| 2                   |           | 12.737                | 116.688         | 96.400        | 48.93              | 42.06                | n.a.           |
| Total:              |           |                       | 238.483         | 229.192       | 100.00             | 100.00               |                |

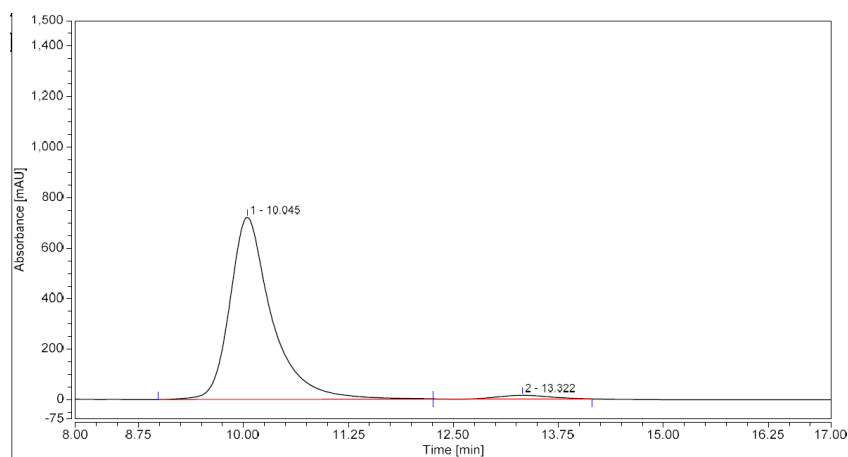

| Integration Results |           |                       |                 |               |                    |                      |                |
|---------------------|-----------|-----------------------|-----------------|---------------|--------------------|----------------------|----------------|
| No.                 | Peak Name | Retention Time<br>min | Area<br>mAU*min | Height<br>mAU | Relative Area<br>% | Relative Height<br>% | Amount<br>n.a. |
| 1                   |           | 10.045                | 418.185         | 720.268       | 97.52              | 98.03                | n.a.           |
| 2                   |           | 13.322                | 10.620          | 14.505        | 2.48               | 1.97                 | n.a.           |
| Total:              |           |                       | 428.805         | 734.773       | 100.00             | 100.00               |                |

4i: IE, *i*-PrOH/hexane = 30/70,  $v = 1.0$  mL/min,  $\lambda = 254$  nm

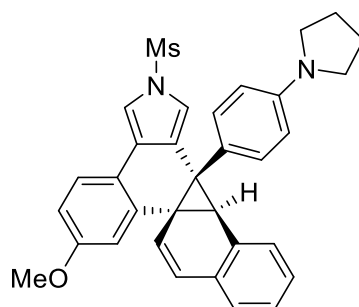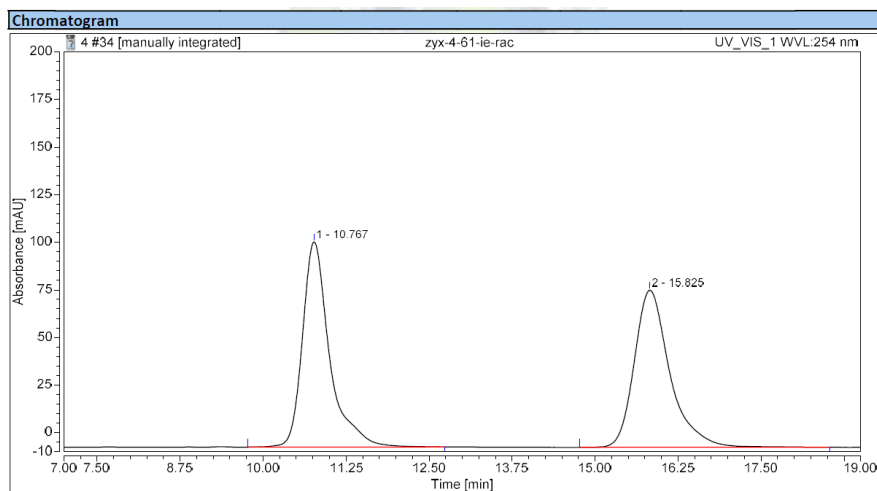

**Integration Results**

| No.           | Peak Name | Retention Time min | Area mAU*min   | Height mAU     | Relative Area % | Relative Height % | Amount n.a. |
|---------------|-----------|--------------------|----------------|----------------|-----------------|-------------------|-------------|
| 300           |           | 10.767             | 51.051         | 107.812        | 49.93           | 56.64             | n.a.        |
| 300           |           | 15.825             | 51.191         | 82.548         | 50.07           | 43.36             | n.a.        |
| <b>Total:</b> |           |                    | <b>102.242</b> | <b>190.360</b> | <b>100.00</b>   | <b>100.00</b>     |             |

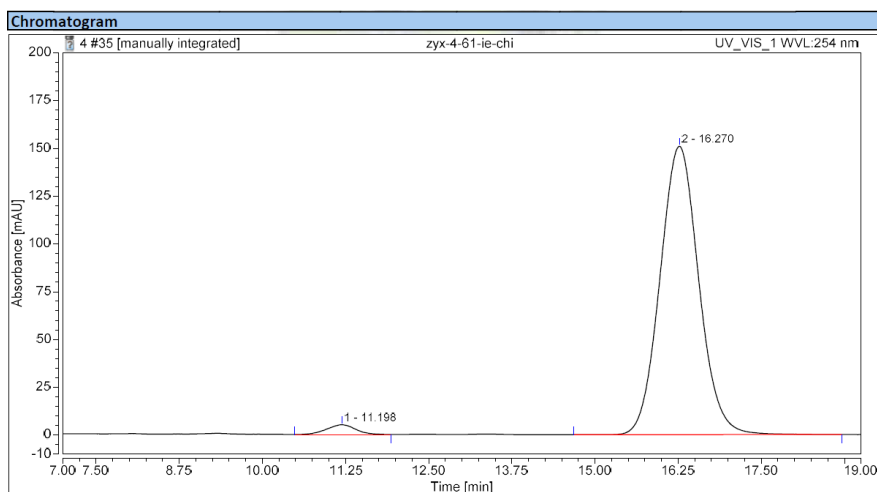

**Integration Results**

| No.           | Peak Name | Retention Time min | Area mAU*min   | Height mAU     | Relative Area % | Relative Height % | Amount n.a. |
|---------------|-----------|--------------------|----------------|----------------|-----------------|-------------------|-------------|
| 300           |           | 11.198             | 2.560          | 5.081          | 2.45            | 3.26              | n.a.        |
| 300           |           | 16.270             | 101.757        | 150.967        | 97.55           | 96.74             | n.a.        |
| <b>Total:</b> |           |                    | <b>104.317</b> | <b>156.048</b> | <b>100.00</b>   | <b>100.00</b>     |             |



4j: IE, *i*-PrOH/hexane = 10/90,  $v = 1.0$  mL/min,  $\lambda = 254$  nm

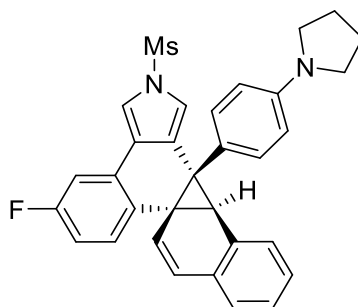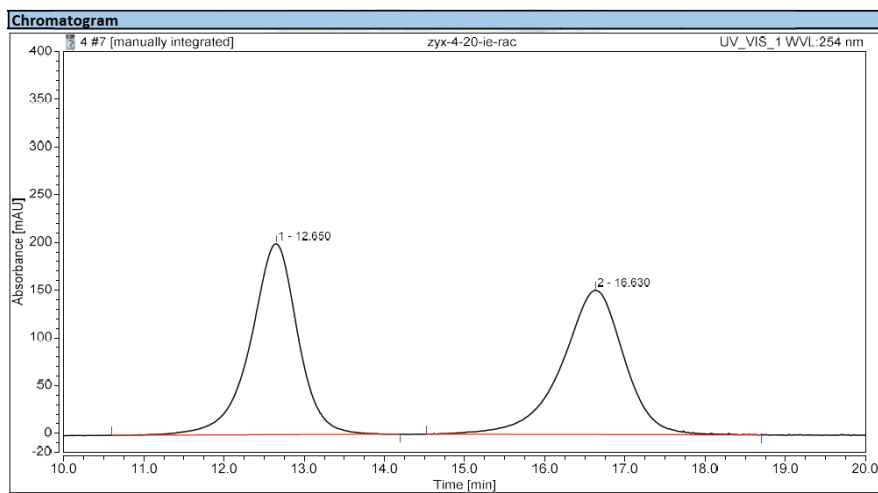

**Integration Results**

| No.           | Peak Name | Retention Time min | Area mAU*min   | Height mAU     | Relative Area % | Relative Height % | Amount n.a. |
|---------------|-----------|--------------------|----------------|----------------|-----------------|-------------------|-------------|
| 300           |           | 12.650             | 137.496        | 200.335        | 50.09           | 56.95             | n.a.        |
| 300           |           | 16.630             | 137.027        | 151.425        | 49.91           | 43.05             | n.a.        |
| <b>Total:</b> |           |                    | <b>274.523</b> | <b>351.760</b> | <b>100.00</b>   | <b>100.00</b>     |             |

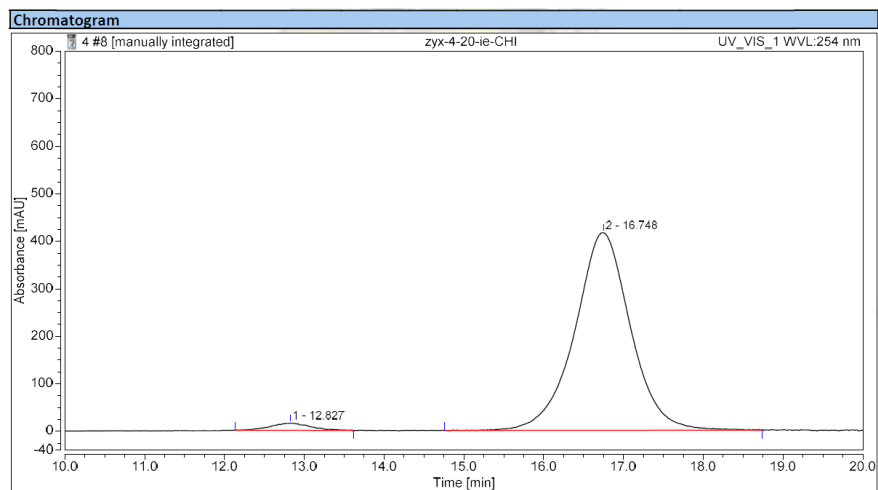

**Integration Results**

| No.           | Peak Name | Retention Time min | Area mAU*min   | Height mAU     | Relative Area % | Relative Height % | Amount n.a. |
|---------------|-----------|--------------------|----------------|----------------|-----------------|-------------------|-------------|
| 300           |           | 12.827             | 8.619          | 15.304         | 2.50            | 3.54              | n.a.        |
| 300           |           | 16.748             | 336.642        | 416.465        | 97.50           | 96.46             | n.a.        |
| <b>Total:</b> |           |                    | <b>345.261</b> | <b>431.770</b> | <b>100.00</b>   | <b>100.00</b>     |             |

4k: IE, *i*-PrOH/hexane = 10/90,  $v = 1.0$  mL/min,  $\lambda = 254$  nm

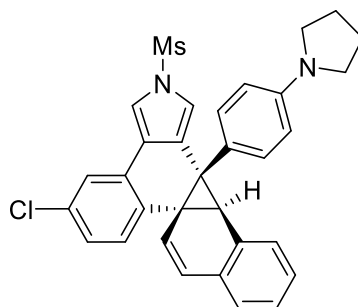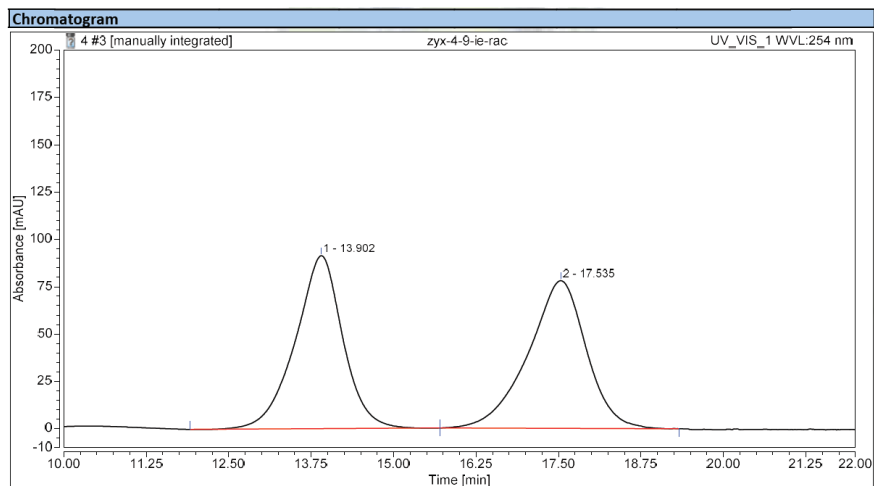

**Integration Results**

| No.           | Peak Name | Retention Time [min] | Area [mAU*min] | Height [mAU]   | Relative Area [%] | Relative Height [%] | Amount |
|---------------|-----------|----------------------|----------------|----------------|-------------------|---------------------|--------|
| 300           |           | 13.902               | 76.408         | 91.393         | 48.90             | 53.94               | n.a.   |
| 300           |           | 17.535               | 79.849         | 78.039         | 51.10             | 46.06               | n.a.   |
| <b>Total:</b> |           |                      | <b>156.256</b> | <b>169.433</b> | <b>100.00</b>     | <b>100.00</b>       |        |

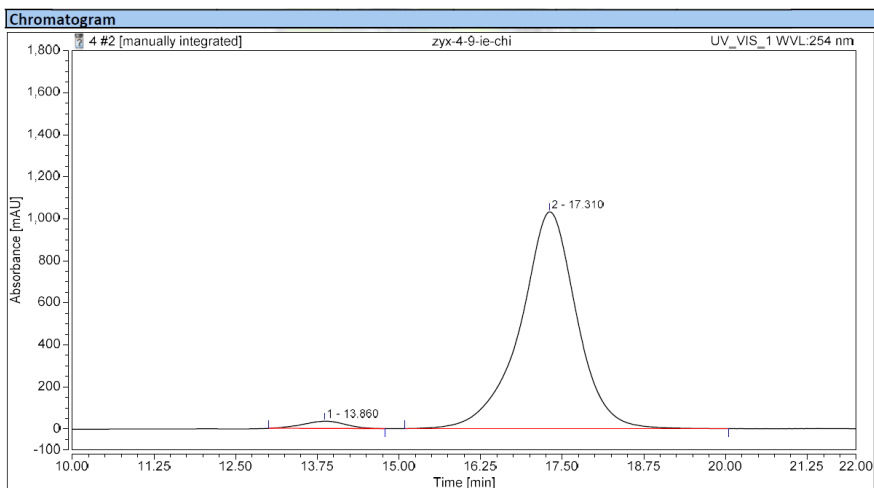

**Integration Results**

| No.           | Peak Name | Retention Time [min] | Area [mAU*min]  | Height [mAU]    | Relative Area [%] | Relative Height [%] | Amount |
|---------------|-----------|----------------------|-----------------|-----------------|-------------------|---------------------|--------|
| 300           |           | 13.860               | 26.485          | 34.801          | 2.50              | 3.26                | n.a.   |
| 300           |           | 17.310               | 1031.861        | 1031.401        | 97.50             | 96.74               | n.a.   |
| <b>Total:</b> |           |                      | <b>1058.346</b> | <b>1066.202</b> | <b>100.00</b>     | <b>100.00</b>       |        |

4l: IE, *i*-PrOH/hexane = 20/80,  $v = 1.0$  mL/min,  $\lambda = 254$  nm

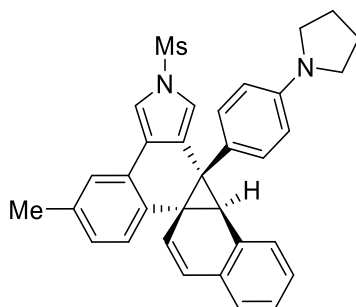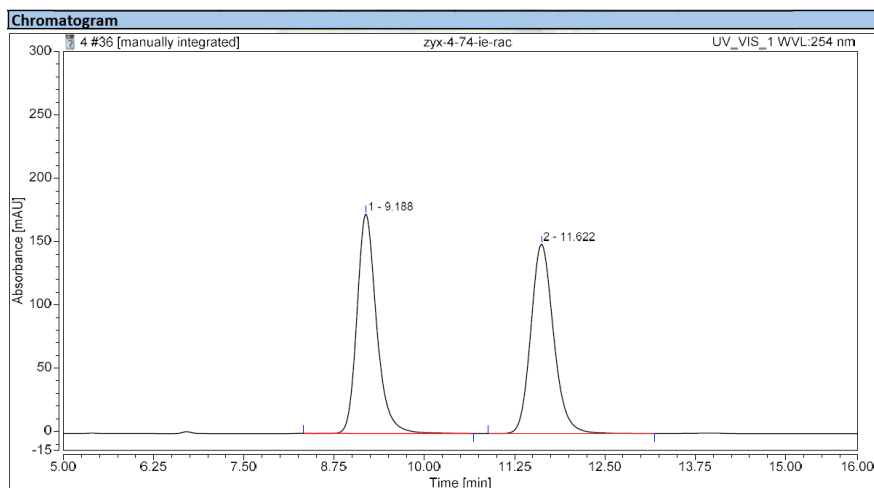

**Integration Results**

| No.           | Peak Name | Retention Time min | Area mAU*min   | Height mAU     | Relative Area % | Relative Height % | Amount |
|---------------|-----------|--------------------|----------------|----------------|-----------------|-------------------|--------|
| 300           |           | 9.188              | 54.647         | 173.317        | 49.89           | 53.67             | n.a.   |
| 300           |           | 11.622             | 54.888         | 149.606        | 50.11           | 46.33             | n.a.   |
| <b>Total:</b> |           |                    | <b>109.535</b> | <b>322.923</b> | <b>100.00</b>   | <b>100.00</b>     |        |

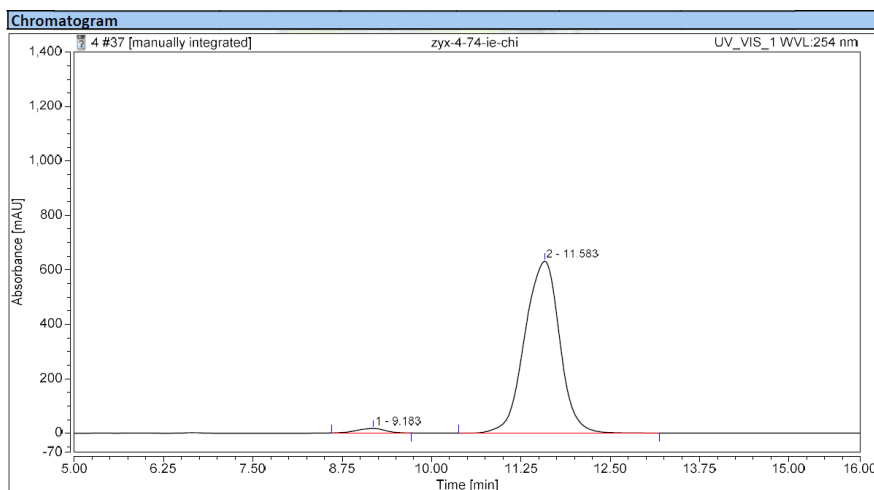

**Integration Results**

| No.           | Peak Name | Retention Time min | Area mAU*min   | Height mAU     | Relative Area % | Relative Height % | Amount |
|---------------|-----------|--------------------|----------------|----------------|-----------------|-------------------|--------|
| 300           |           | 9.183              | 7.608          | 16.663         | 2.09            | 2.57              | n.a.   |
| 300           |           | 11.583             | 357.204        | 631.445        | 97.91           | 97.43             | n.a.   |
| <b>Total:</b> |           |                    | <b>364.812</b> | <b>648.108</b> | <b>100.00</b>   | <b>100.00</b>     |        |

4m: IE, *i*-PrOH/hexane = 20/80,  $v = 1.0$  mL/min,  $\lambda = 254$  nm

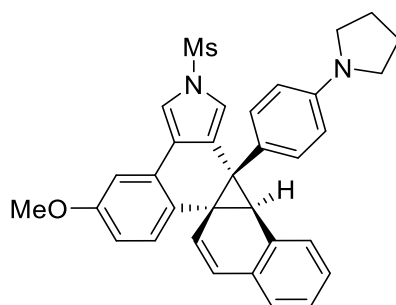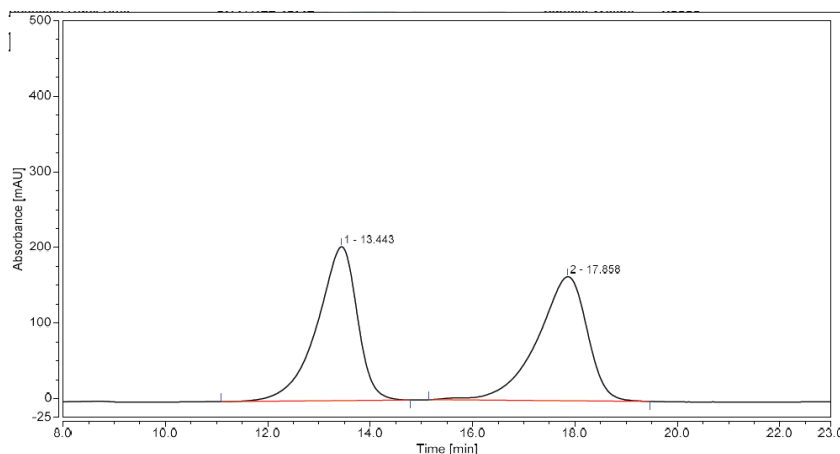

| Integration Results |           |                       |                 |                |                    |                      |                |
|---------------------|-----------|-----------------------|-----------------|----------------|--------------------|----------------------|----------------|
| No.                 | Peak Name | Retention Time<br>min | Area<br>mAU*min | Height<br>mAU  | Relative Area<br>% | Relative Height<br>% | Amount<br>n.a. |
| 1                   |           | 13.443                | 185.657         | 203.603        | 50.01              | 55.35                | n.a.           |
| 2                   |           | 17.858                | 185.607         | 164.253        | 49.99              | 44.65                | n.a.           |
| <b>Total:</b>       |           |                       | <b>371.264</b>  | <b>367.856</b> | <b>100.00</b>      | <b>100.00</b>        |                |

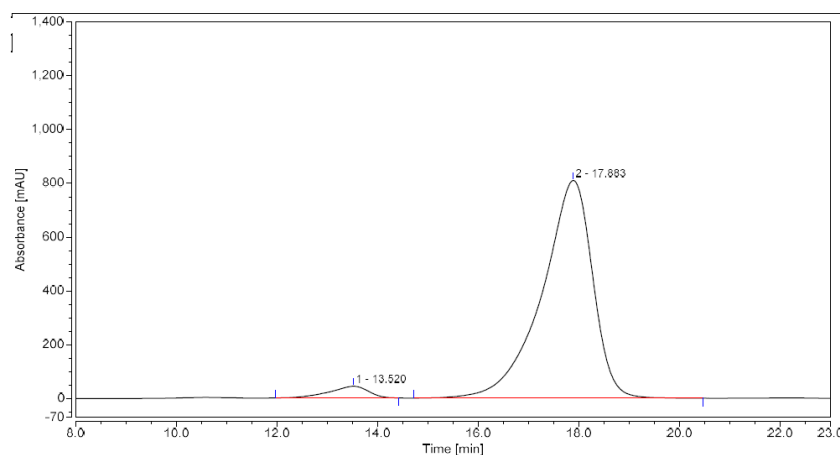

| Integration Results |           |                       |                 |                |                    |                      |                |
|---------------------|-----------|-----------------------|-----------------|----------------|--------------------|----------------------|----------------|
| No.                 | Peak Name | Retention Time<br>min | Area<br>mAU*min | Height<br>mAU  | Relative Area<br>% | Relative Height<br>% | Amount<br>n.a. |
| 1                   |           | 13.520                | 39.773          | 43.690         | 4.04               | 5.12                 | n.a.           |
| 2                   |           | 17.883                | 944.894         | 809.319        | 95.96              | 94.88                | n.a.           |
| <b>Total:</b>       |           |                       | <b>984.667</b>  | <b>853.009</b> | <b>100.00</b>      | <b>100.00</b>        |                |

**4n: IE**, *i*-PrOH/hexane = 20/80,  $v = 1.0$  mL/min,  $\lambda = 254$  nm

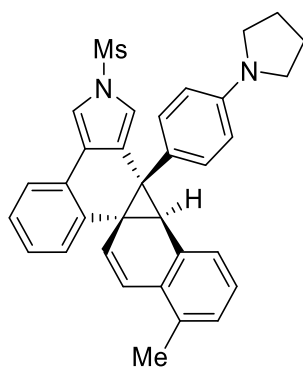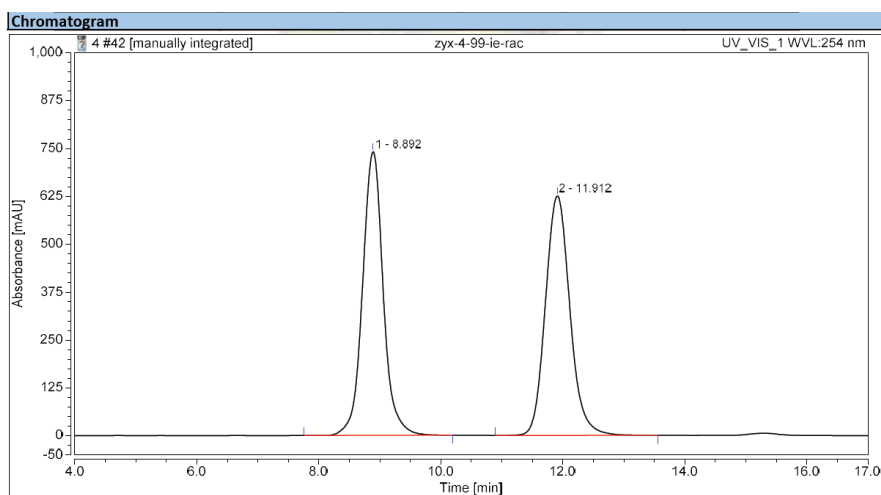

**Integration Results**

| No.           | Peak Name | Retention Time min | Area mAU*min   | Height mAU      | Relative Area % | Relative Height % | Amount n.a. |
|---------------|-----------|--------------------|----------------|-----------------|-----------------|-------------------|-------------|
| 300           |           | 8.892              | 290.270        | 740.689         | 49.94           | 54.21             | n.a.        |
| 300           |           | 11.912             | 290.978        | 625.617         | 50.06           | 45.79             | n.a.        |
| <b>Total:</b> |           |                    | <b>581.247</b> | <b>1366.306</b> | <b>100.00</b>   | <b>100.00</b>     |             |

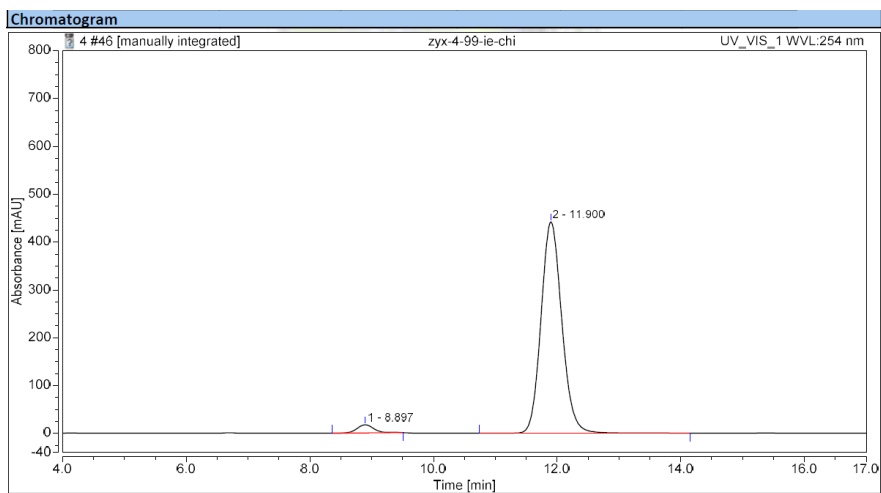

**Integration Results**

| No.           | Peak Name | Retention Time min | Area mAU*min   | Height mAU     | Relative Area % | Relative Height % | Amount n.a. |
|---------------|-----------|--------------------|----------------|----------------|-----------------|-------------------|-------------|
| 300           |           | 8.897              | 5.432          | 17.022         | 3.06            | 3.71              | n.a.        |
| 300           |           | 11.900             | 172.048        | 442.145        | 96.94           | 96.29             | n.a.        |
| <b>Total:</b> |           |                    | <b>177.480</b> | <b>459.167</b> | <b>100.00</b>   | <b>100.00</b>     |             |

4o: IE, *i*-PrOH/hexane = 15/85,  $v = 1.0$  mL/min,  $\lambda = 254$  nm

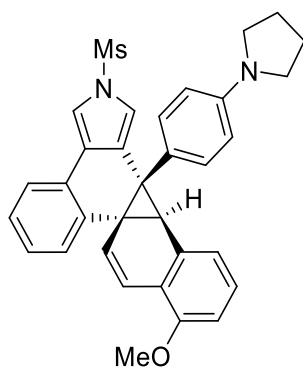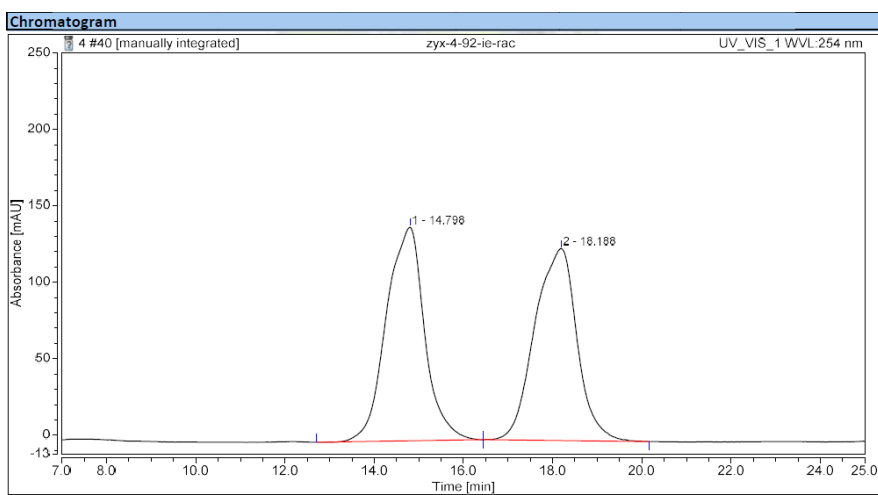

**Integration Results**

| No.           | Peak Name | Retention Time min | Area mAU*min   | Height mAU     | Relative Area % | Relative Height % | Amount n.a. |
|---------------|-----------|--------------------|----------------|----------------|-----------------|-------------------|-------------|
| 300           |           | 14.798             | 138.799        | 139.675        | 50.24           | 52.65             | n.a.        |
| 300           |           | 18.188             | 137.488        | 125.621        | 49.76           | 47.35             | n.a.        |
| <b>Total:</b> |           |                    | <b>276.287</b> | <b>265.296</b> | <b>100.00</b>   | <b>100.00</b>     |             |

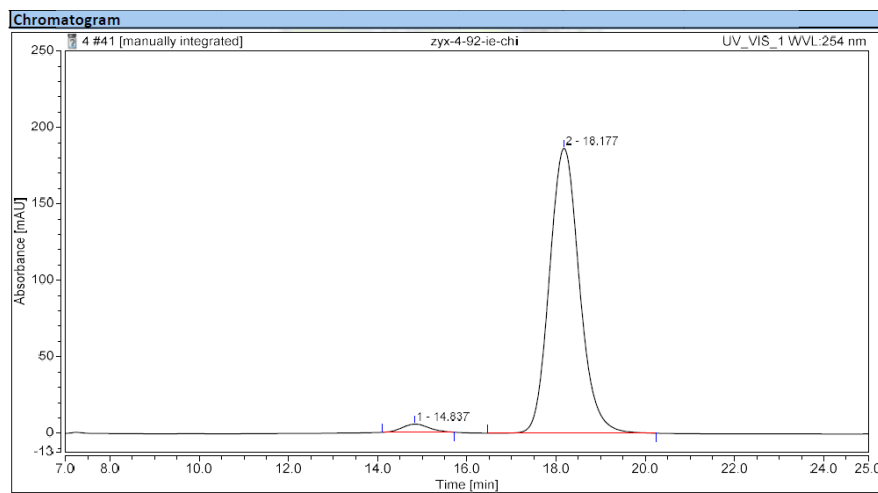

**Integration Results**

| No.           | Peak Name | Retention Time min | Area mAU*min   | Height mAU     | Relative Area % | Relative Height % | Amount n.a. |
|---------------|-----------|--------------------|----------------|----------------|-----------------|-------------------|-------------|
| 300           |           | 14.837             | 3.829          | 5.410          | 2.57            | 2.82              | n.a.        |
| 300           |           | 18.177             | 144.979        | 186.464        | 97.43           | 97.18             | n.a.        |
| <b>Total:</b> |           |                    | <b>148.809</b> | <b>191.874</b> | <b>100.00</b>   | <b>100.00</b>     |             |

**4p: IE**, *i*-PrOH/hexane = 20/80,  $v = 1.0$  mL/min,  $\lambda = 254$  nm

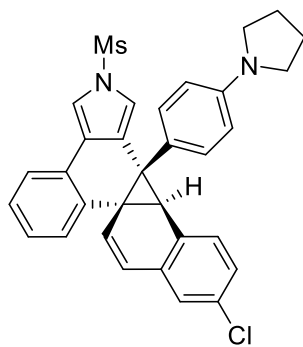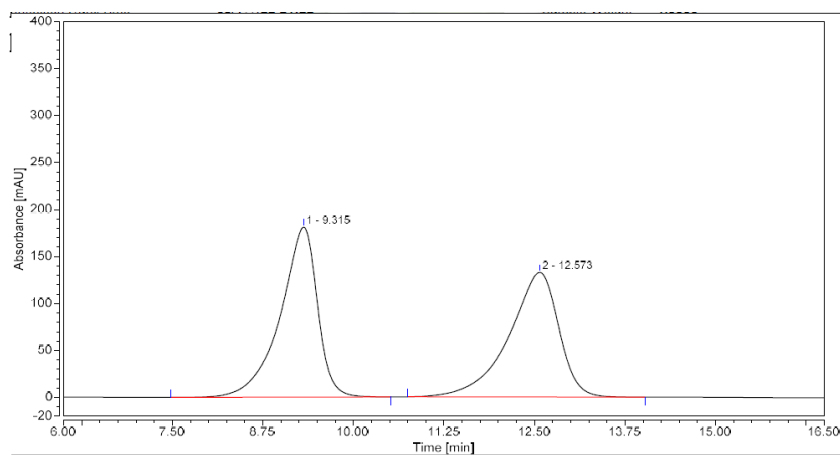

| Integration Results |           |                       |                 |                |                    |                      |                |
|---------------------|-----------|-----------------------|-----------------|----------------|--------------------|----------------------|----------------|
| No.                 | Peak Name | Retention Time<br>min | Area<br>mAU*min | Height<br>mAU  | Relative Area<br>% | Relative Height<br>% | Amount<br>n.a. |
| 1                   |           | 9.315                 | 108.235         | 181.029        | 50.52              | 57.71                | n.a.           |
| 2                   |           | 12.573                | 106.018         | 132.669        | 49.48              | 42.29                | n.a.           |
| <b>Total:</b>       |           |                       | <b>214.253</b>  | <b>313.699</b> | <b>100.00</b>      | <b>100.00</b>        |                |

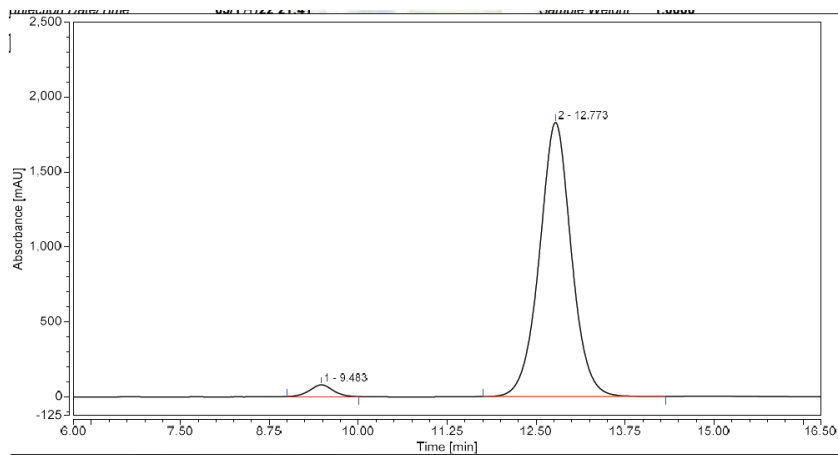

| Integration Results |           |                       |                 |                 |                    |                      |                |
|---------------------|-----------|-----------------------|-----------------|-----------------|--------------------|----------------------|----------------|
| No.                 | Peak Name | Retention Time<br>min | Area<br>mAU*min | Height<br>mAU   | Relative Area<br>% | Relative Height<br>% | Amount<br>n.a. |
| 1                   |           | 9.483                 | 29.635          | 78.341          | 3.02               | 4.11                 | n.a.           |
| 2                   |           | 12.773                | 952.621         | 1829.489        | 96.98              | 95.89                | n.a.           |
| <b>Total:</b>       |           |                       | <b>982.256</b>  | <b>1907.830</b> | <b>100.00</b>      | <b>100.00</b>        |                |

**4q: IE**, *i*-PrOH/hexane = 20/80,  $v = 1.0$  mL/min,  $\lambda = 254$  nm

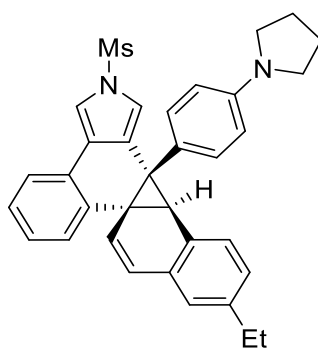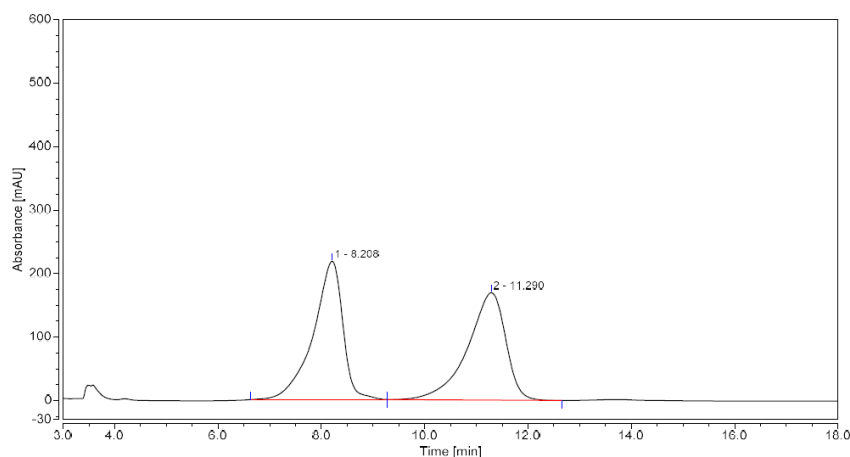

| Integration Results |           |                       |                 |                |                    |                      |                |
|---------------------|-----------|-----------------------|-----------------|----------------|--------------------|----------------------|----------------|
| No.                 | Peak Name | Retention Time<br>min | Area<br>mAU*min | Height<br>mAU  | Relative Area<br>% | Relative Height<br>% | Amount<br>n.a. |
| 1                   |           | 8.208                 | 144.631         | 217.865        | 50.03              | 56.30                | n.a.           |
| 2                   |           | 11.290                | 144.479         | 169.131        | 49.97              | 43.70                | n.a.           |
| <b>Total:</b>       |           |                       | <b>289.110</b>  | <b>386.996</b> | <b>100.00</b>      | <b>100.00</b>        |                |

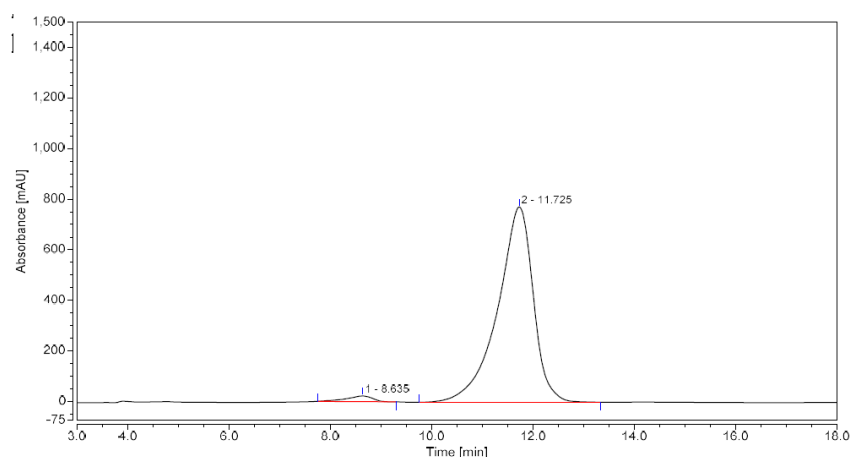

| Integration Results |           |                       |                 |                |                    |                      |                |
|---------------------|-----------|-----------------------|-----------------|----------------|--------------------|----------------------|----------------|
| No.                 | Peak Name | Retention Time<br>min | Area<br>mAU*min | Height<br>mAU  | Relative Area<br>% | Relative Height<br>% | Amount<br>n.a. |
| 1                   |           | 8.635                 | 13.221          | 22.037         | 2.06               | 2.78                 | n.a.           |
| 2                   |           | 11.725                | 628.518         | 771.968        | 97.94              | 97.22                | n.a.           |
| <b>Total:</b>       |           |                       | <b>641.739</b>  | <b>794.005</b> | <b>100.00</b>      | <b>100.00</b>        |                |



**4r: IE**, *i*-PrOH/hexane = 30/70,  $\nu = 1.0$  mL/min,  $\lambda = 254$  nm

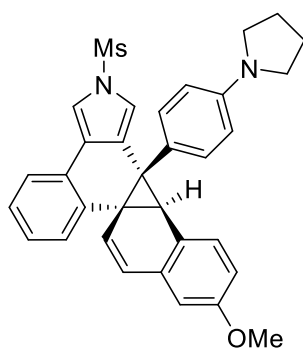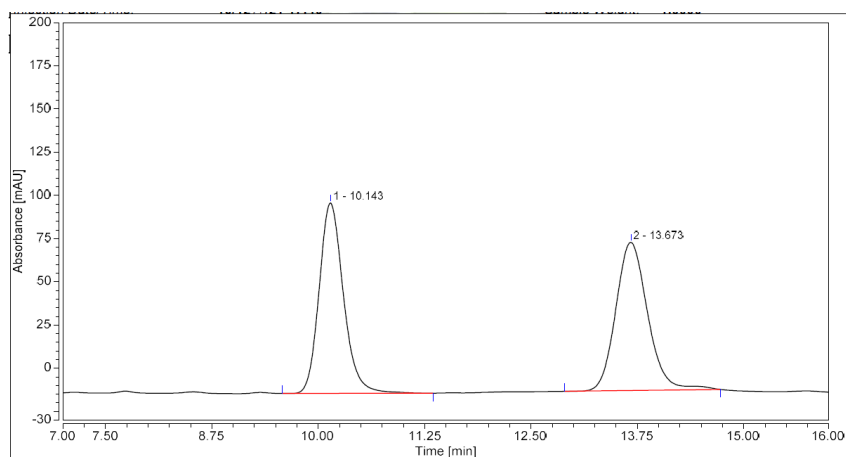

| Integration Results |           |                    |              |            |                 |                   |             |
|---------------------|-----------|--------------------|--------------|------------|-----------------|-------------------|-------------|
| No.                 | Peak Name | Retention Time min | Area mAU*min | Height mAU | Relative Area % | Relative Height % | Amount n.a. |
| 1                   |           | 10.143             | 36.413       | 110.090    | 49.46           | 56.22             | n.a.        |
| 2                   |           | 13.673             | 37.205       | 85.716     | 50.54           | 43.78             | n.a.        |
| Total:              |           |                    | 73.618       | 195.807    | 100.00          | 100.00            |             |

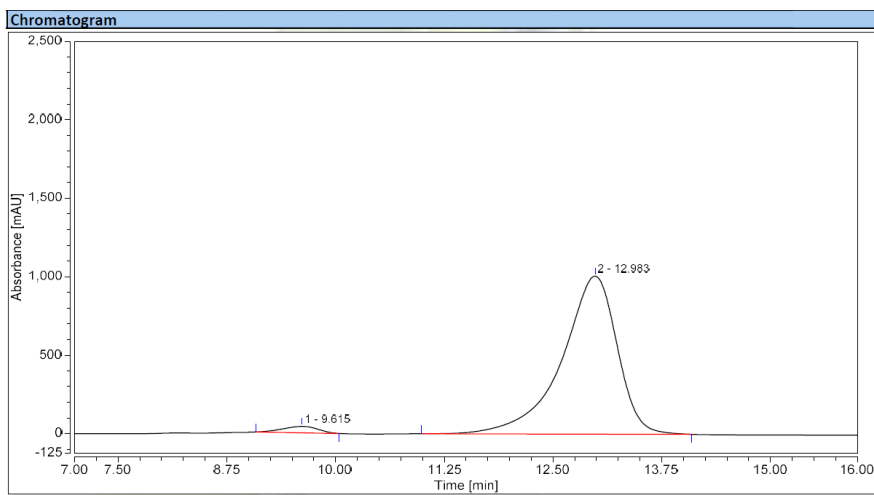

| Integration Results |           |                    |              |            |                 |                   |             |
|---------------------|-----------|--------------------|--------------|------------|-----------------|-------------------|-------------|
| No.                 | Peak Name | Retention Time min | Area mAU*min | Height mAU | Relative Area % | Relative Height % | Amount n.a. |
| 1                   |           | 9.615              | 19.031       | 41.316     | 2.50            | 3.94              | n.a.        |
| 2                   |           | 12.983             | 742.926      | 1007.004   | 97.50           | 96.06             | n.a.        |
| Total:              |           |                    | 761.957      | 1048.320   | 100.00          | 100.00            |             |

4s: IE, *i*-PrOH/hexane = 10/90,  $v = 1.0$  mL/min,  $\lambda = 254$  nm

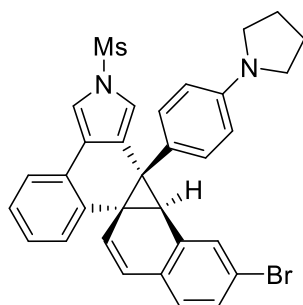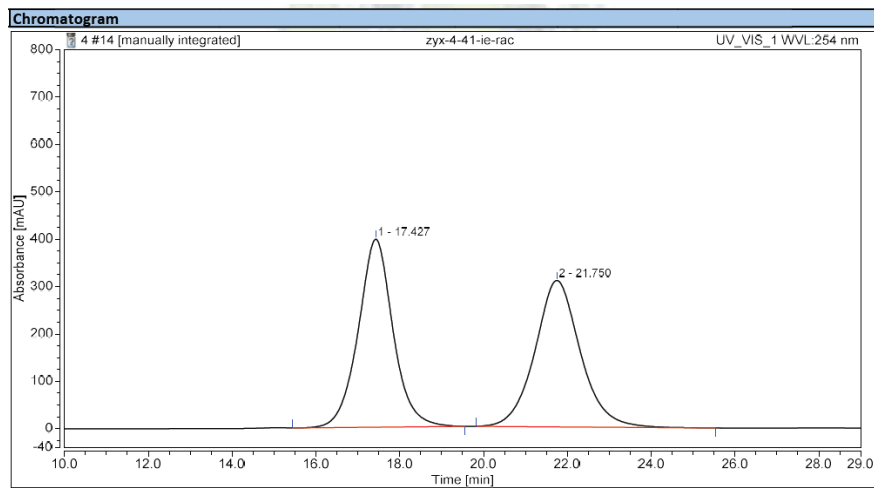

**Integration Results**

| No.           | Peak Name | Retention Time min | Area mAU*min   | Height mAU     | Relative Area % | Relative Height % | Amount n.a. |
|---------------|-----------|--------------------|----------------|----------------|-----------------|-------------------|-------------|
| 300           |           | 17.427             | 383.435        | 397.102        | 49.70           | 56.22             | n.a.        |
| 300           |           | 21.750             | 388.136        | 309.256        | 50.30           | 43.78             | n.a.        |
| <b>Total:</b> |           |                    | <b>771.571</b> | <b>706.358</b> | <b>100.00</b>   | <b>100.00</b>     |             |

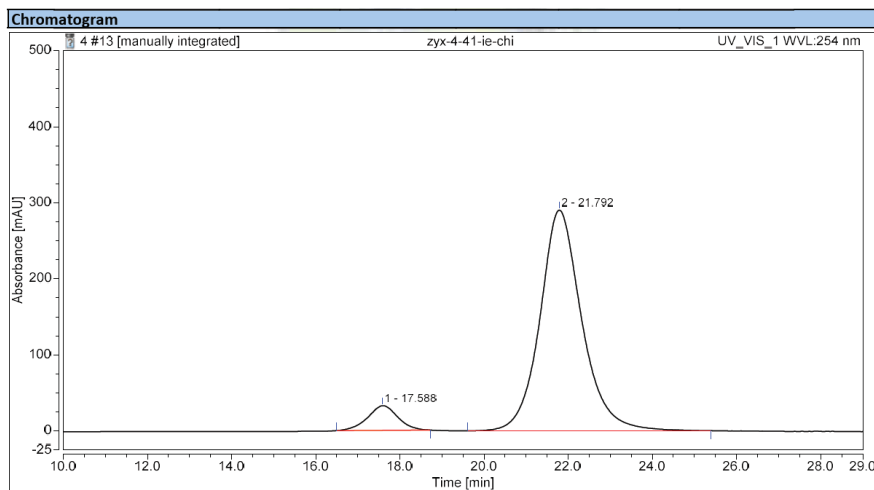

**Integration Results**

| No.           | Peak Name | Retention Time min | Area mAU*min   | Height mAU     | Relative Area % | Relative Height % | Amount n.a. |
|---------------|-----------|--------------------|----------------|----------------|-----------------|-------------------|-------------|
| 300           |           | 17.588             | 26.962         | 32.416         | 7.44            | 10.05             | n.a.        |
| 300           |           | 21.792             | 335.253        | 290.231        | 92.56           | 89.95             | n.a.        |
| <b>Total:</b> |           |                    | <b>362.215</b> | <b>322.648</b> | <b>100.00</b>   | <b>100.00</b>     |             |

4t: IE, *i*-PrOH/hexane = 30/70,  $v = 1.0$  mL/min,  $\lambda = 254$  nm

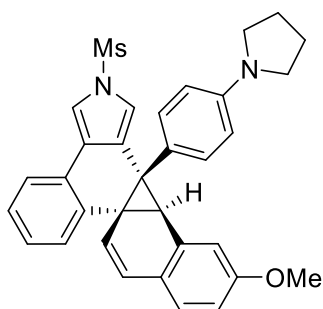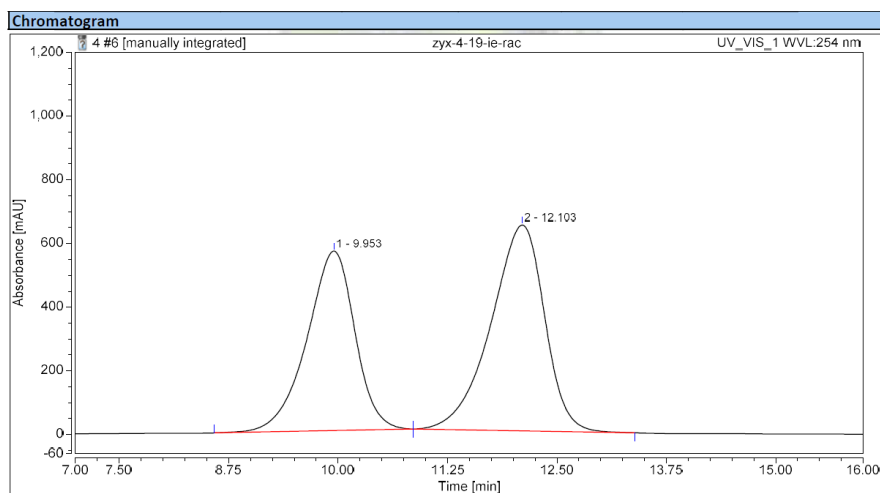

**Integration Results**

| No.           | Peak Name | Retention Time<br>min | Area<br>mAU*min | Height<br>mAU   | Relative Area<br>% | Relative Height<br>% | Amount<br>n.a. |
|---------------|-----------|-----------------------|-----------------|-----------------|--------------------|----------------------|----------------|
| 300           |           | 9.953                 | 358.801         | 563.799         | 43.84              | 46.59                | n.a.           |
| 300           |           | 12.103                | 459.639         | 646.254         | 56.16              | 53.41                | n.a.           |
| <b>Total:</b> |           |                       | <b>818.439</b>  | <b>1210.053</b> | <b>100.00</b>      | <b>100.00</b>        |                |

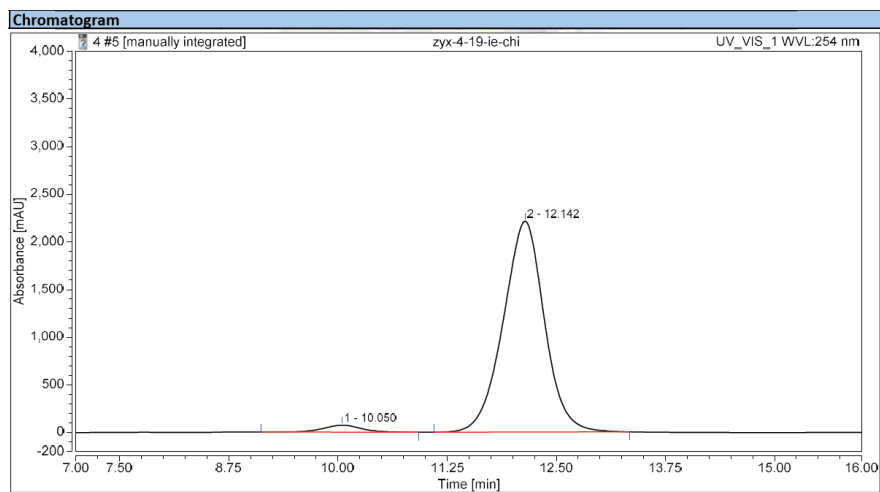

**Integration Results**

| No.           | Peak Name | Retention Time<br>min | Area<br>mAU*min | Height<br>mAU   | Relative Area<br>% | Relative Height<br>% | Amount<br>n.a. |
|---------------|-----------|-----------------------|-----------------|-----------------|--------------------|----------------------|----------------|
| 300           |           | 10.050                | 37.007          | 72.818          | 2.97               | 3.19                 | n.a.           |
| 300           |           | 12.142                | 1209.940        | 2212.802        | 97.03              | 96.81                | n.a.           |
| <b>Total:</b> |           |                       | <b>1246.947</b> | <b>2285.620</b> | <b>100.00</b>      | <b>100.00</b>        |                |

4u: IE, *i*-PrOH/hexane = 15/85,  $v = 1.0$  mL/min,  $\lambda = 254$  nm

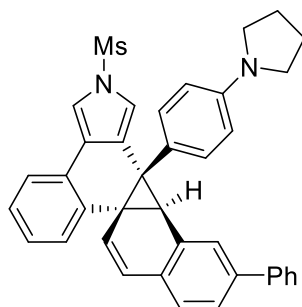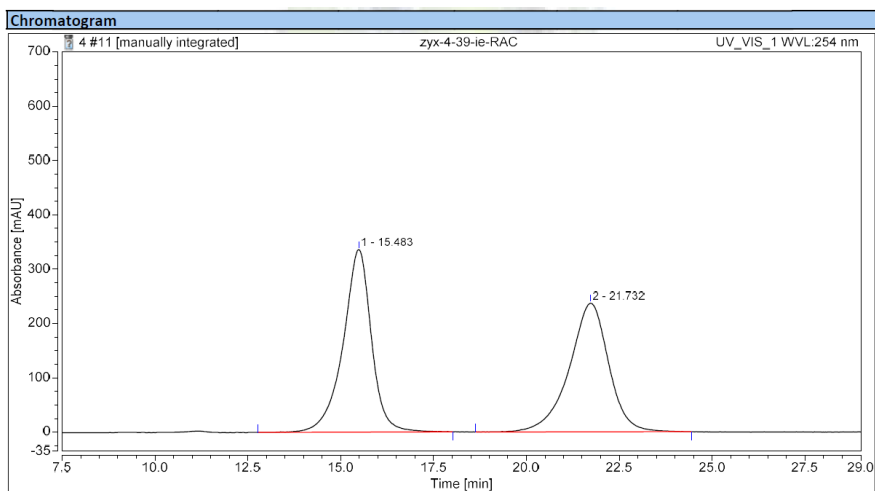

**Integration Results**

| No.           | Peak Name | Retention Time min | Area mAU*min   | Height mAU     | Relative Area % | Relative Height % | Amount |
|---------------|-----------|--------------------|----------------|----------------|-----------------|-------------------|--------|
| 300           |           | 15.483             | 298.381        | 336.211        | 50.55           | 58.66             | n.a.   |
| 300           |           | 21.732             | 291.897        | 236.915        | 49.45           | 41.34             | n.a.   |
| <b>Total:</b> |           |                    | <b>590.277</b> | <b>573.126</b> | <b>100.00</b>   | <b>100.00</b>     |        |

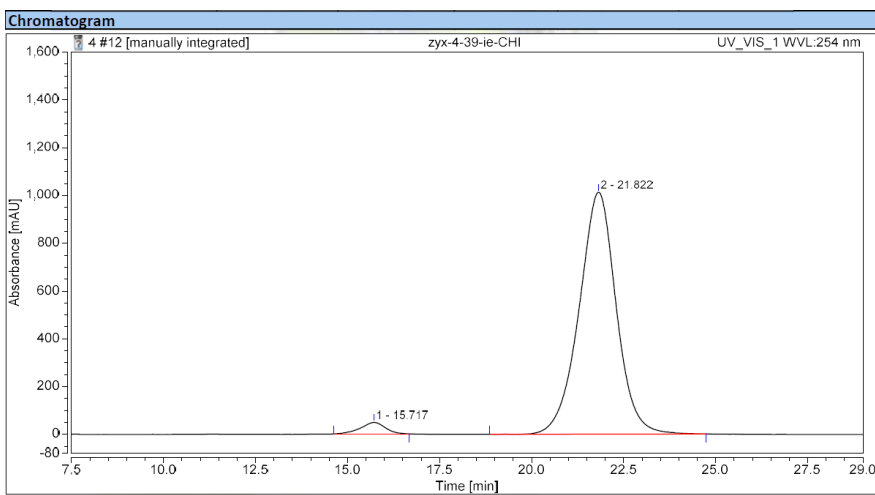

**Integration Results**

| No.           | Peak Name | Retention Time min | Area mAU*min    | Height mAU      | Relative Area % | Relative Height % | Amount |
|---------------|-----------|--------------------|-----------------|-----------------|-----------------|-------------------|--------|
| 300           |           | 15.717             | 37.299          | 48.027          | 3.05            | 4.52              | n.a.   |
| 300           |           | 21.822             | 1185.039        | 1013.470        | 96.95           | 95.48             | n.a.   |
| <b>Total:</b> |           |                    | <b>1222.338</b> | <b>1061.497</b> | <b>100.00</b>   | <b>100.00</b>     |        |

4v: IE, *i*-PrOH/hexane = 30/70,  $v = 1.0$  mL/min,  $\lambda = 254$  nm

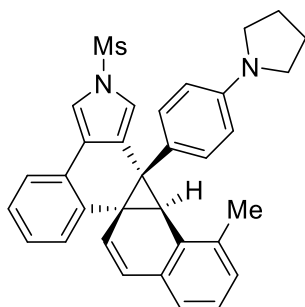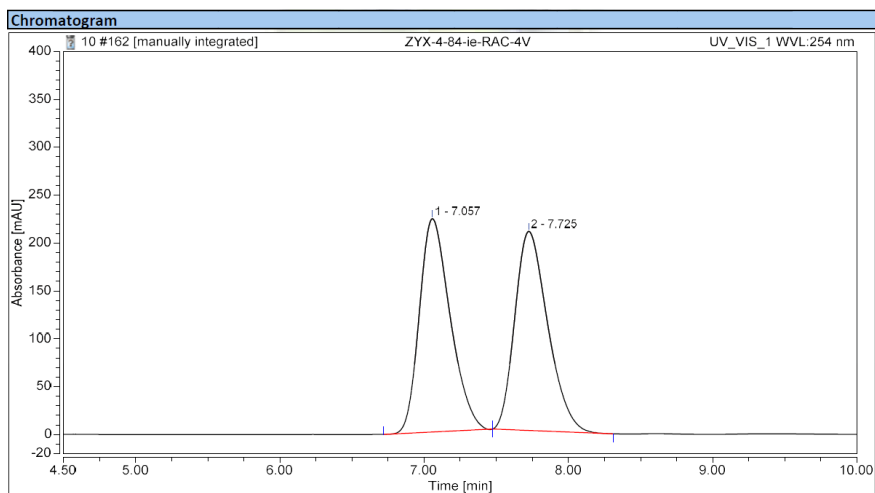

**Integration Results**

| No.           | Peak Name | Retention Time min | Area mAU*min   | Height mAU     | Relative Area % | Relative Height % | Amount |
|---------------|-----------|--------------------|----------------|----------------|-----------------|-------------------|--------|
| 1             |           | 7.057              | 55.189         | 222.771        | 50.08           | 51.73             | n.a.   |
| 2             |           | 7.725              | 55.013         | 207.874        | 49.92           | 48.27             | n.a.   |
| <b>Total:</b> |           |                    | <b>110.201</b> | <b>430.645</b> | <b>100.00</b>   | <b>100.00</b>     |        |

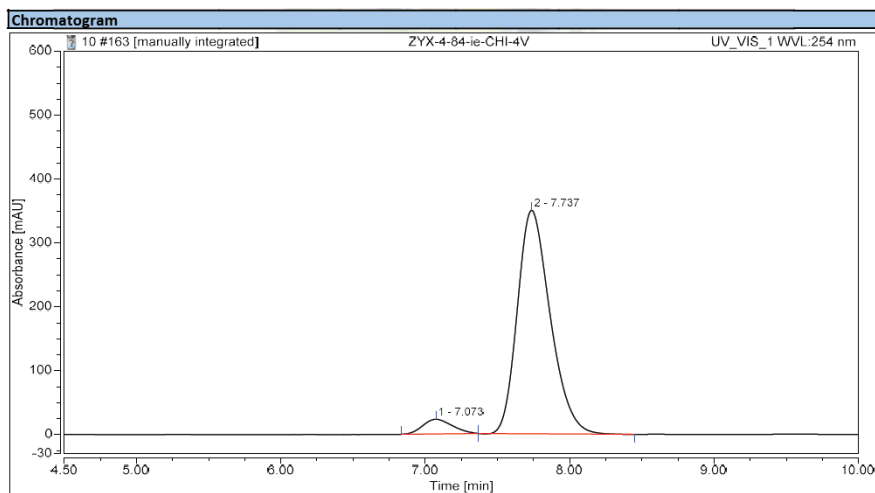

**Integration Results**

| No.           | Peak Name | Retention Time min | Area mAU*min  | Height mAU     | Relative Area % | Relative Height % | Amount |
|---------------|-----------|--------------------|---------------|----------------|-----------------|-------------------|--------|
| 1             |           | 7.073              | 5.378         | 22.856         | 5.51            | 6.13              | n.a.   |
| 2             |           | 7.737              | 92.267        | 349.829        | 94.49           | 93.87             | n.a.   |
| <b>Total:</b> |           |                    | <b>97.645</b> | <b>372.685</b> | <b>100.00</b>   | <b>100.00</b>     |        |

4w: ADH, *i*-PrOH/hexane = 30/70,  $v = 1.0$  mL/min,  $\lambda = 254$  nm

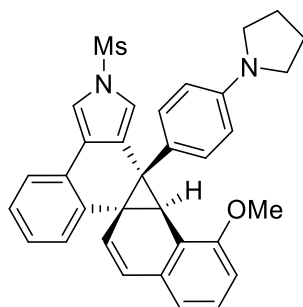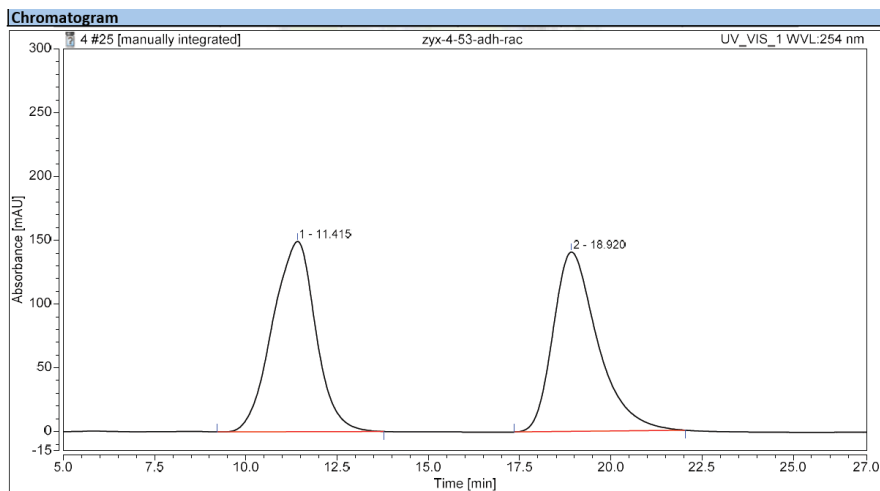

**Integration Results**

| No.           | Peak Name | Retention Time min | Area mAU*min   | Height mAU     | Relative Area % | Relative Height % | Amount |
|---------------|-----------|--------------------|----------------|----------------|-----------------|-------------------|--------|
| 300           |           | 11.415             | 204.844        | 149.245        | 50.65           | 51.48             | n.a.   |
| 300           |           | 18.920             | 199.561        | 140.669        | 49.35           | 48.52             | n.a.   |
| <b>Total:</b> |           |                    | <b>404.405</b> | <b>289.914</b> | <b>100.00</b>   | <b>100.00</b>     |        |

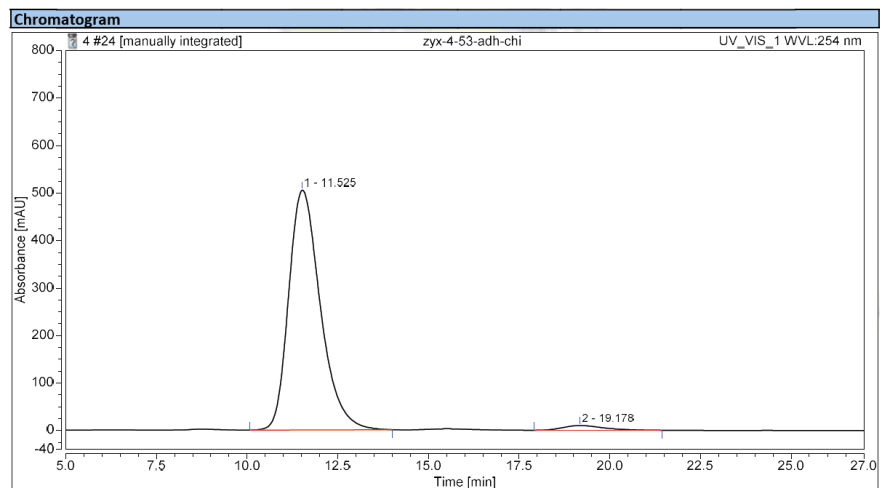

**Integration Results**

| No.           | Peak Name | Retention Time min | Area mAU*min   | Height mAU     | Relative Area % | Relative Height % | Amount |
|---------------|-----------|--------------------|----------------|----------------|-----------------|-------------------|--------|
| 300           |           | 11.525             | 511.603        | 505.094        | 97.52           | 98.06             | n.a.   |
| 300           |           | 19.178             | 12.993         | 9.972          | 2.48            | 1.94              | n.a.   |
| <b>Total:</b> |           |                    | <b>524.596</b> | <b>515.066</b> | <b>100.00</b>   | <b>100.00</b>     |        |

4x: IC, *i*-PrOH/hexane = 20/80,  $v = 1.0$  mL/min,  $\lambda = 254$  nm

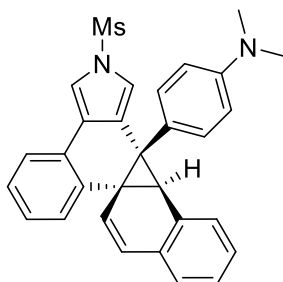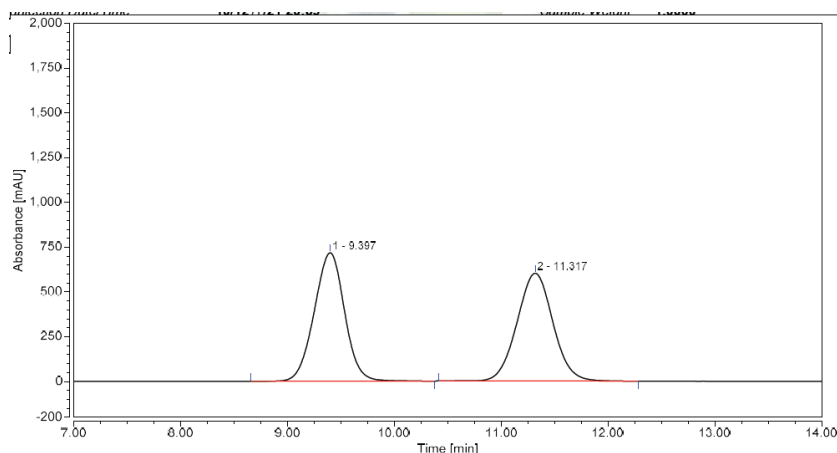

| Integration Results |           |                       |                 |                 |                    |                      |                |
|---------------------|-----------|-----------------------|-----------------|-----------------|--------------------|----------------------|----------------|
| No.                 | Peak Name | Retention Time<br>min | Area<br>mAU*min | Height<br>mAU   | Relative Area<br>% | Relative Height<br>% | Amount<br>n.a. |
| 1                   |           | 9.397                 | 235.689         | 716.790         | 50.18              | 54.37                | n.a.           |
| 2                   |           | 11.317                | 234.036         | 601.651         | 49.82              | 45.63                | n.a.           |
| <b>Total:</b>       |           |                       | <b>469.724</b>  | <b>1318.441</b> | <b>100.00</b>      | <b>100.00</b>        |                |

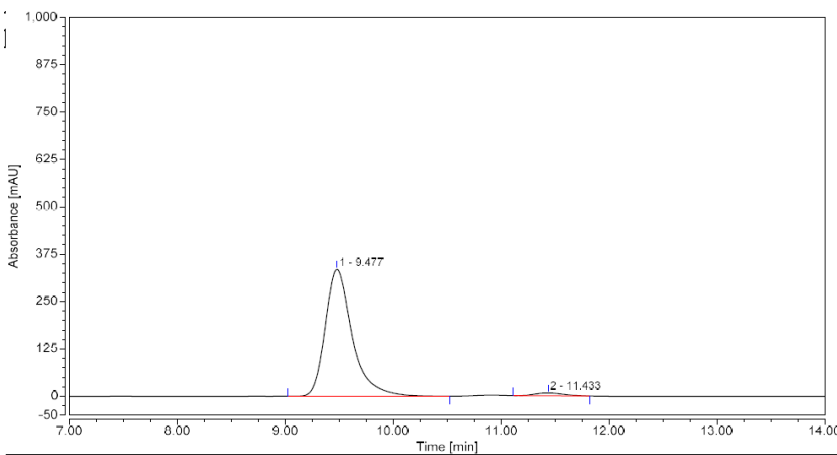

| Integration Results |           |                       |                 |                |                    |                      |                |
|---------------------|-----------|-----------------------|-----------------|----------------|--------------------|----------------------|----------------|
| No.                 | Peak Name | Retention Time<br>min | Area<br>mAU*min | Height<br>mAU  | Relative Area<br>% | Relative Height<br>% | Amount<br>n.a. |
| 1                   |           | 9.477                 | 97.044          | 335.069        | 97.63              | 97.75                | n.a.           |
| 2                   |           | 11.433                | 2.354           | 7.718          | 2.37               | 2.25                 | n.a.           |
| <b>Total:</b>       |           |                       | <b>99.398</b>   | <b>342.787</b> | <b>100.00</b>      | <b>100.00</b>        |                |

4y: IA, *i*-PrOH/hexane = 50/50,  $v = 1.0$  mL/min,  $\lambda = 254$  nm

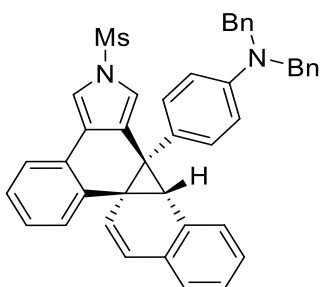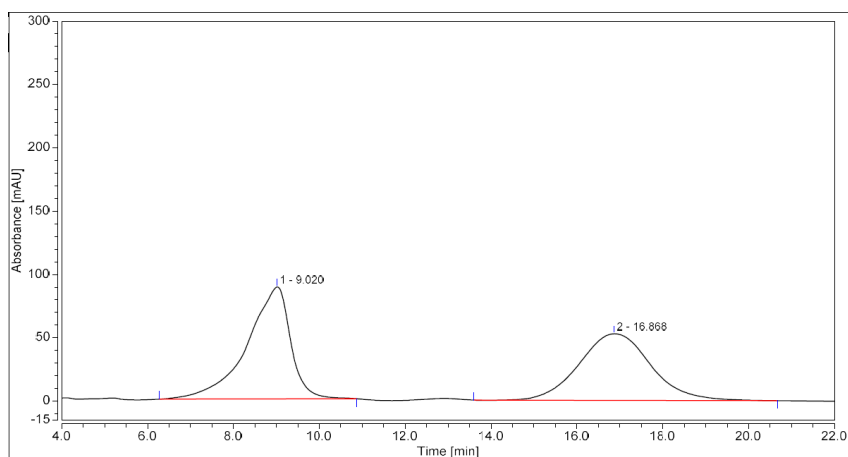

| Integration Results |           |                       |                 |                |                    |                      |                |
|---------------------|-----------|-----------------------|-----------------|----------------|--------------------|----------------------|----------------|
| No.                 | Peak Name | Retention Time<br>min | Area<br>mAU*min | Height<br>mAU  | Relative Area<br>% | Relative Height<br>% | Amount<br>n.a. |
| 1                   |           | 9.020                 | 103.922         | 88.371         | 50.81              | 62.73                | n.a.           |
| 2                   |           | 16.868                | 101.421         | 52.506         | 49.39              | 37.27                | n.a.           |
| <b>Total:</b>       |           |                       | <b>205.343</b>  | <b>140.877</b> | <b>100.00</b>      | <b>100.00</b>        |                |

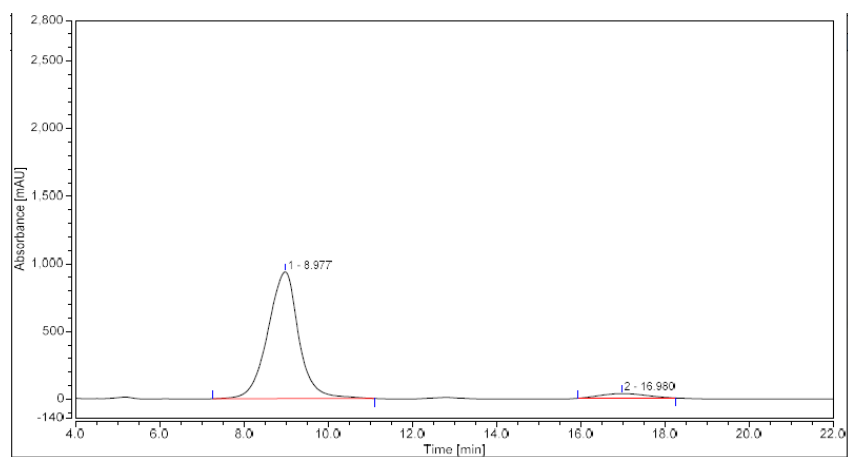

| Integration Results |           |                       |                 |                |                    |                      |                |
|---------------------|-----------|-----------------------|-----------------|----------------|--------------------|----------------------|----------------|
| No.                 | Peak Name | Retention Time<br>min | Area<br>mAU*min | Height<br>mAU  | Relative Area<br>% | Relative Height<br>% | Amount<br>n.a. |
| 1                   |           | 8.977                 | 798.424         | 938.167        | 94.96              | 96.56                | n.a.           |
| 2                   |           | 16.980                | 42.381          | 33.450         | 5.04               | 3.44                 | n.a.           |
| <b>Total:</b>       |           |                       | <b>840.805</b>  | <b>971.617</b> | <b>100.00</b>      | <b>100.00</b>        |                |



**4z: IE**, *i*-PrOH/hexane = 20/80,  $v = 1.0$  mL/min,  $\lambda = 254$  nm

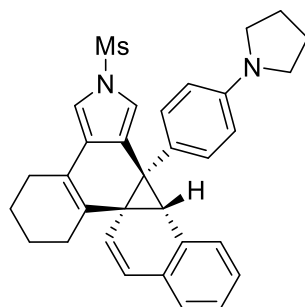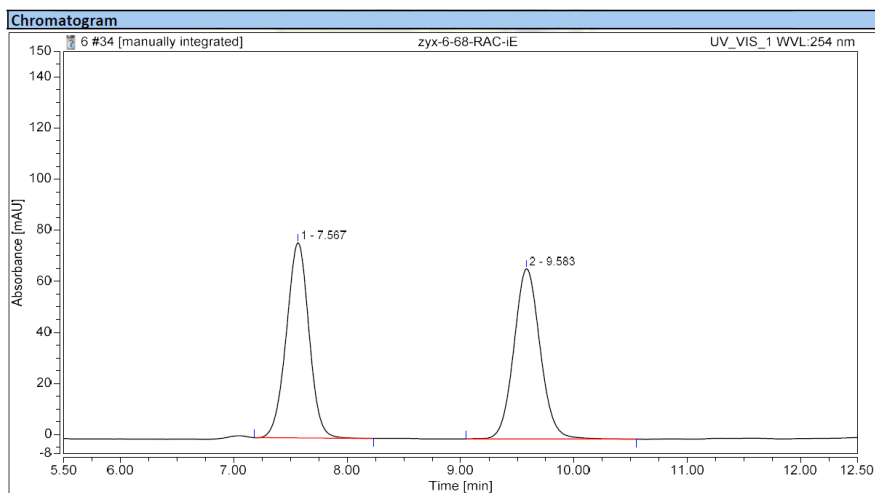

**Integration Results**

| No.           | Peak Name | Retention Time min | Area mAU*min  | Height mAU     | Relative Area % | Relative Height % | Amount |
|---------------|-----------|--------------------|---------------|----------------|-----------------|-------------------|--------|
| 1             |           | 7.567              | 17.698        | 76.443         | 49.76           | 53.42             | n.a.   |
| 2             |           | 9.583              | 17.870        | 66.656         | 50.24           | 46.58             | n.a.   |
| <b>Total:</b> |           |                    | <b>35.567</b> | <b>143.099</b> | <b>100.00</b>   | <b>100.00</b>     |        |

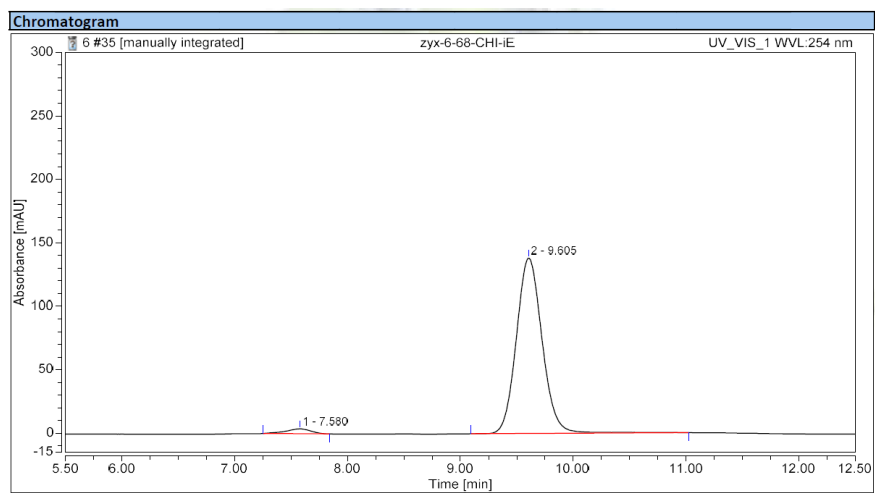

**Integration Results**

| No.           | Peak Name | Retention Time min | Area mAU*min  | Height mAU     | Relative Area % | Relative Height % | Amount |
|---------------|-----------|--------------------|---------------|----------------|-----------------|-------------------|--------|
| 1             |           | 7.580              | 0.955         | 3.759          | 2.54            | 2.65              | n.a.   |
| 2             |           | 9.605              | 36.642        | 138.197        | 97.46           | 97.35             | n.a.   |
| <b>Total:</b> |           |                    | <b>37.597</b> | <b>141.956</b> | <b>100.00</b>   | <b>100.00</b>     |        |

4aa: IE, *i*-PrOH/hexane = 30/70,  $v = 1.0$  mL/min,  $\lambda = 254$  nm

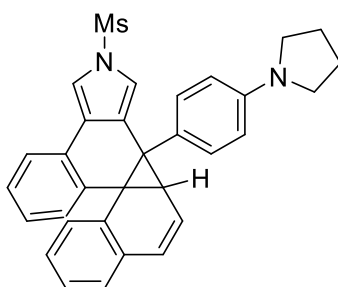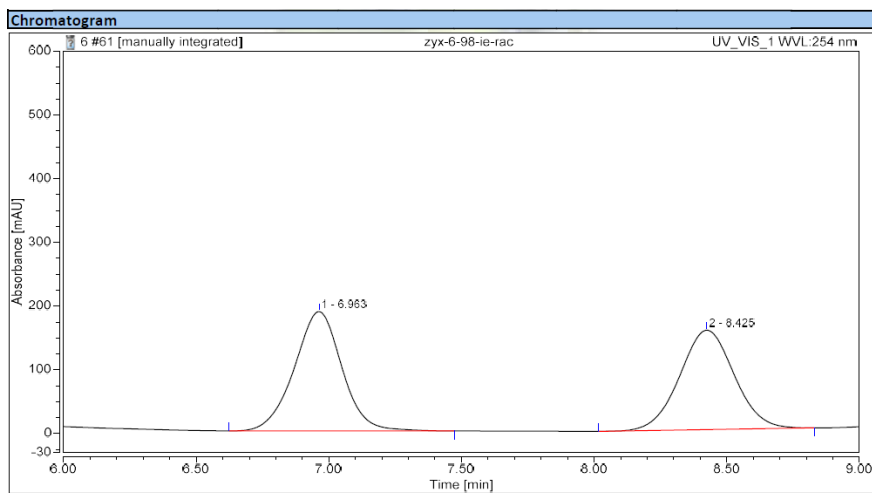

**Integration Results**

| No.           | Peak Name | Retention Time min | Area mAU*min  | Height mAU     | Relative Area % | Relative Height % | Amount |
|---------------|-----------|--------------------|---------------|----------------|-----------------|-------------------|--------|
| 1             |           | 6.963              | 38.971        | 187.200        | 51.17           | 54.54             | n.a.   |
| 2             |           | 8.425              | 37.187        | 156.012        | 48.83           | 45.46             | n.a.   |
| <b>Total:</b> |           |                    | <b>76.158</b> | <b>343.212</b> | <b>100.00</b>   | <b>100.00</b>     |        |

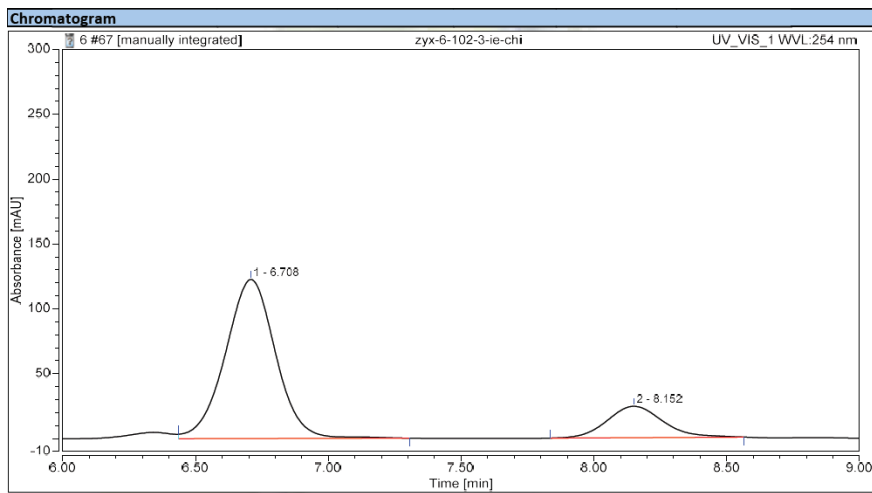

**Integration Results**

| No.           | Peak Name | Retention Time min | Area mAU*min  | Height mAU     | Relative Area % | Relative Height % | Amount |
|---------------|-----------|--------------------|---------------|----------------|-----------------|-------------------|--------|
| 1             |           | 6.708              | 26.942        | 122.760        | 82.08           | 83.52             | n.a.   |
| 2             |           | 8.152              | 5.883         | 24.218         | 17.92           | 16.48             | n.a.   |
| <b>Total:</b> |           |                    | <b>32.824</b> | <b>146.977</b> | <b>100.00</b>   | <b>100.00</b>     |        |

**4ab: IB**, *i*-PrOH/hexane = 40/60,  $v = 1.0$  mL/min,  $\lambda = 254$  nm

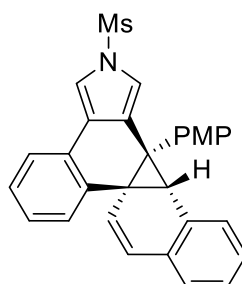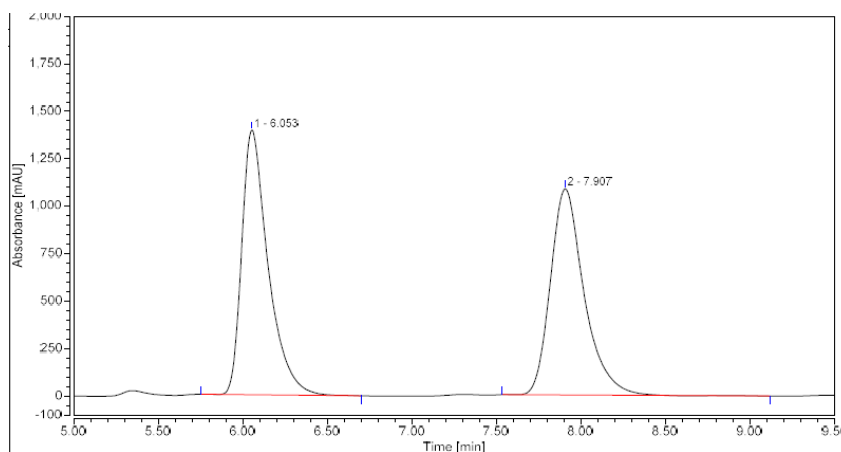

| Integration Results |           |                       |                 |               |                    |                      |                |
|---------------------|-----------|-----------------------|-----------------|---------------|--------------------|----------------------|----------------|
| No.                 | Peak Name | Retention Time<br>min | Area<br>mAU*min | Height<br>mAU | Relative Area<br>% | Relative Height<br>% | Amount<br>n.a. |
| 1                   |           | 6.053                 | 251.856         | 1394.074      | 50.09              | 56.22                | n.a.           |
| 2                   |           | 7.907                 | 250.975         | 1085.591      | 49.91              | 43.78                | n.a.           |
| Total:              |           |                       | 502.832         | 2479.665      | 100.00             | 100.00               |                |

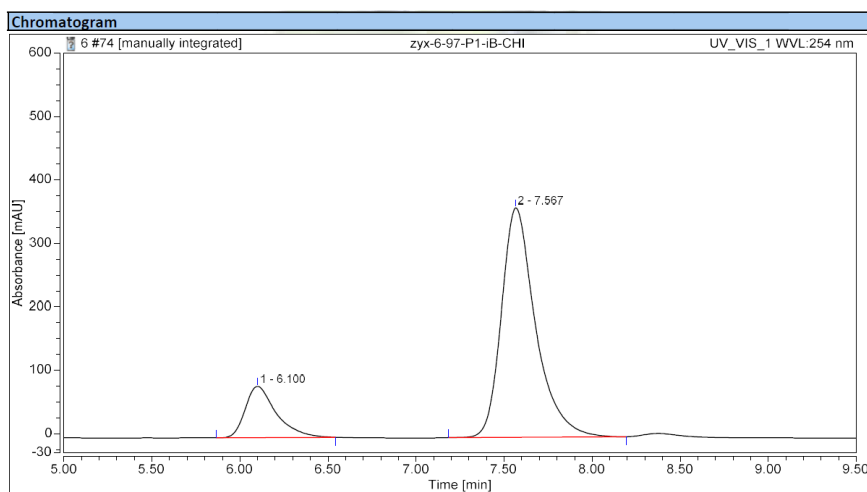

| Integration Results |           |                       |                 |               |                    |                      |                |
|---------------------|-----------|-----------------------|-----------------|---------------|--------------------|----------------------|----------------|
| No.                 | Peak Name | Retention Time<br>min | Area<br>mAU*min | Height<br>mAU | Relative Area<br>% | Relative Height<br>% | Amount<br>n.a. |
| 1                   |           | 6.100                 | 16.466          | 80.875        | 16.86              | 18.28                | n.a.           |
| 2                   |           | 7.567                 | 81.191          | 361.592       | 83.14              | 81.72                | n.a.           |
| Total:              |           |                       | 97.657          | 442.467       | 100.00             | 100.00               |                |

**4ab'**: IG, *i*-PrOH/hexane = 40/60,  $v = 1.0$  mL/min,  $\lambda = 254$  nm

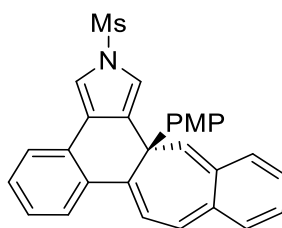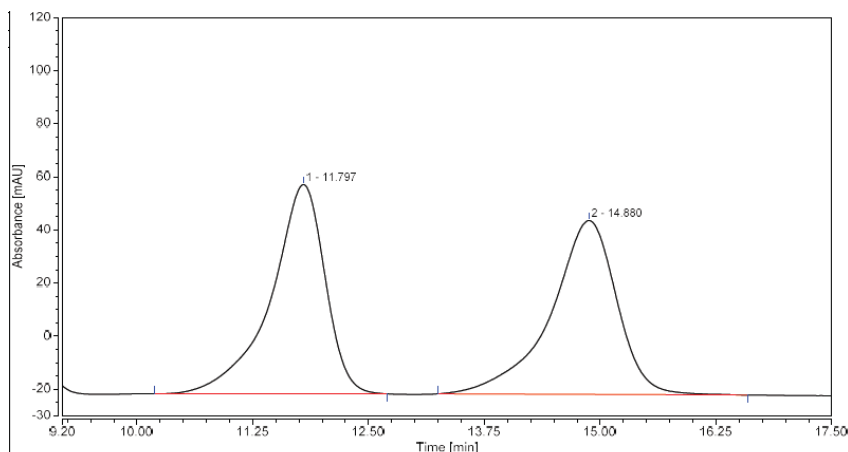

| Integration Results |           |                       |                 |                |                    |                      |                |
|---------------------|-----------|-----------------------|-----------------|----------------|--------------------|----------------------|----------------|
| No.                 | Peak Name | Retention Time<br>min | Area<br>mAU*min | Height<br>mAU  | Relative Area<br>% | Relative Height<br>% | Amount<br>n.a. |
| 1                   |           | 11.797                | 53.506          | 78.826         | 49.74              | 54.62                | n.a.           |
| 2                   |           | 14.880                | 54.069          | 65.490         | 50.26              | 45.38                | n.a.           |
| <b>Total:</b>       |           |                       | <b>107.575</b>  | <b>144.315</b> | <b>100.00</b>      | <b>100.00</b>        |                |

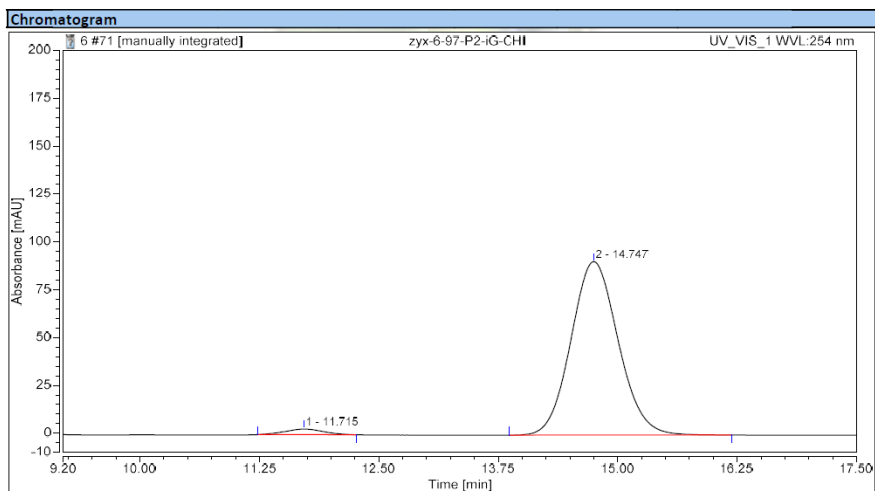

| Integration Results |           |                       |                 |               |                    |                      |                |
|---------------------|-----------|-----------------------|-----------------|---------------|--------------------|----------------------|----------------|
| No.                 | Peak Name | Retention Time<br>min | Area<br>mAU*min | Height<br>mAU | Relative Area<br>% | Relative Height<br>% | Amount<br>n.a. |
| 1                   |           | 11.715                | 1.343           | 2.885         | 2.52               | 3.09                 | n.a.           |
| 2                   |           | 14.747                | 51.922          | 90.629        | 97.48              | 96.91                | n.a.           |
| <b>Total:</b>       |           |                       | <b>53.265</b>   | <b>93.514</b> | <b>100.00</b>      | <b>100.00</b>        |                |

**4ac: IC**, *i*-PrOH/hexane = 30/70,  $v = 1.0$  mL/min,  $\lambda = 254$  nm

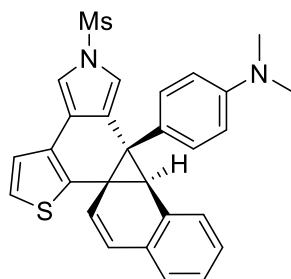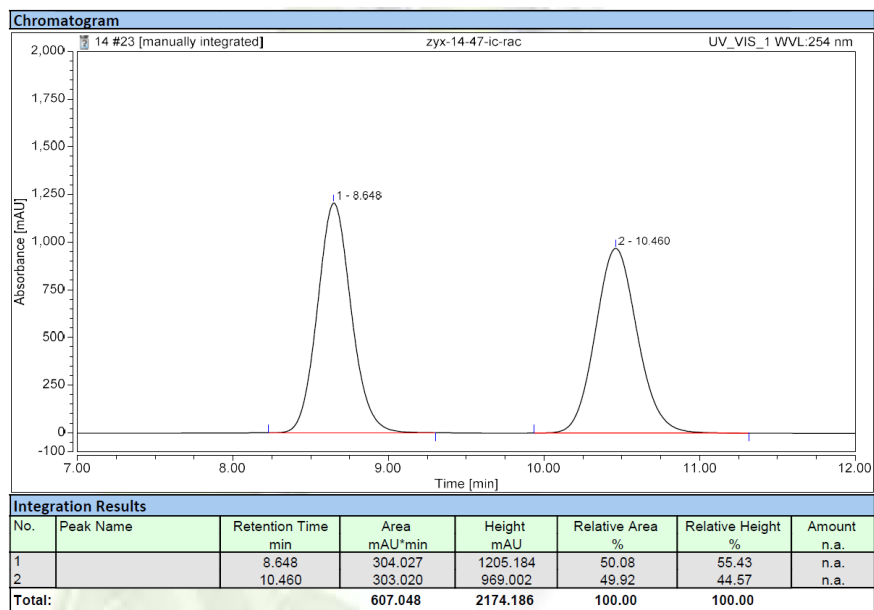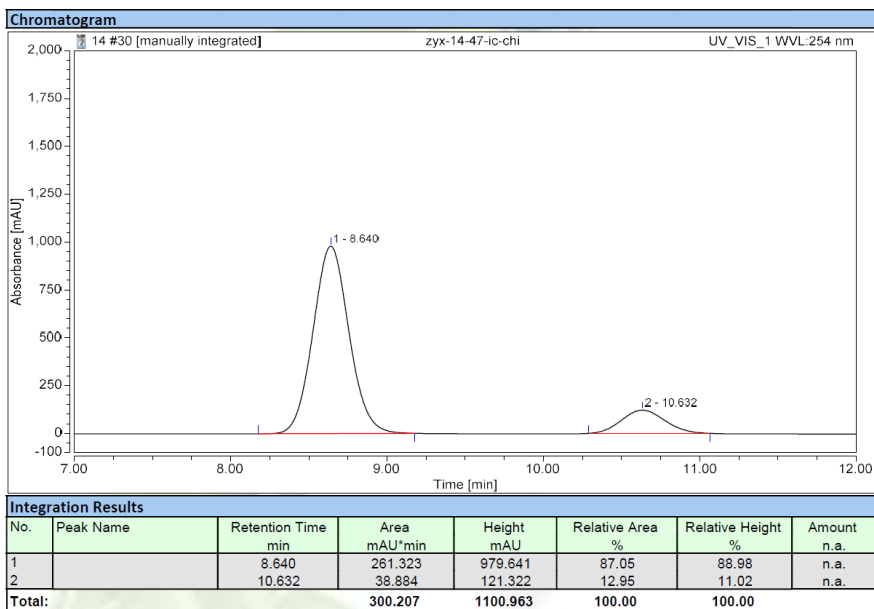

4ad: ADH, *i*-PrOH/hexane = 50/50,  $v = 1.0$  mL/min,  $\lambda = 254$  nm

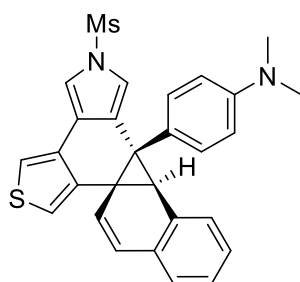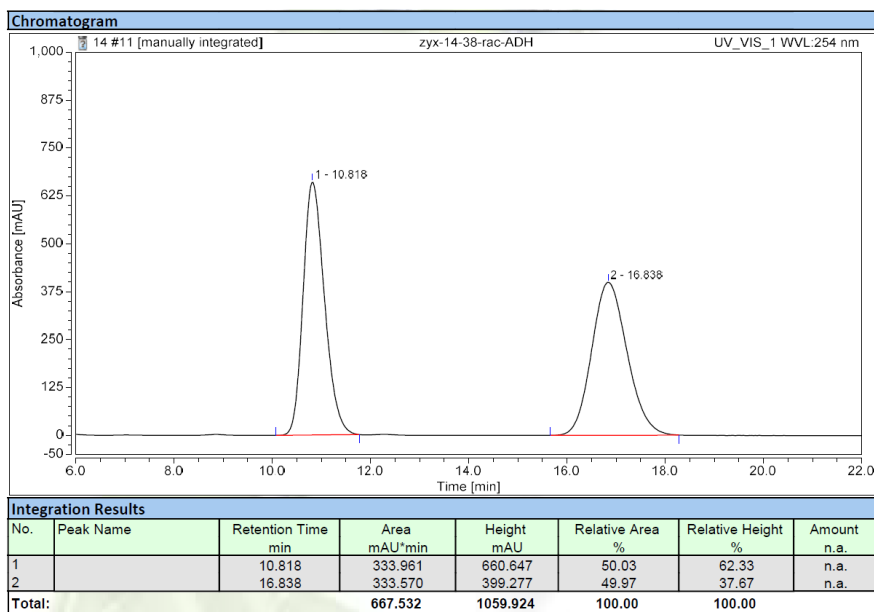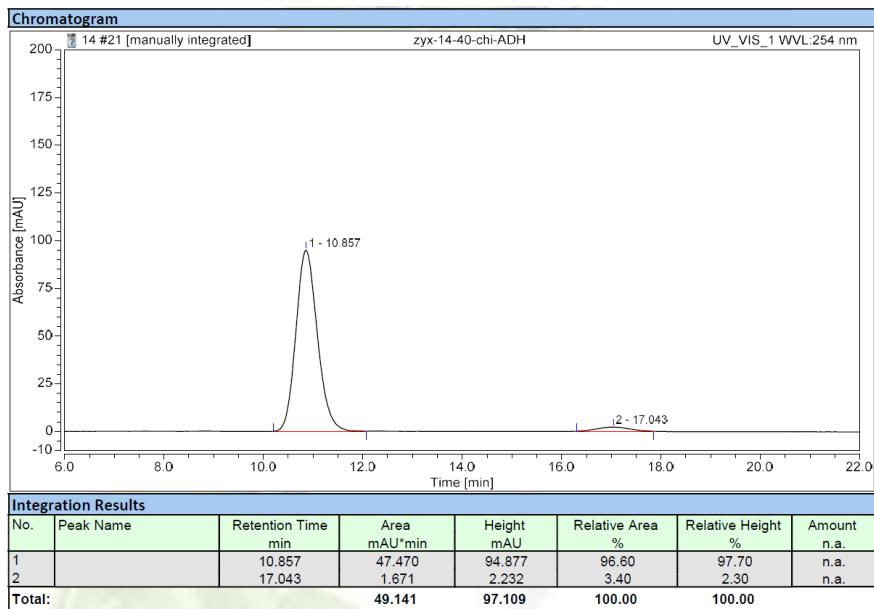

**4ae: IA**, *i*-PrOH/hexane = 10/90,  $v = 1.0$  mL/min,  $\lambda = 254$  nm

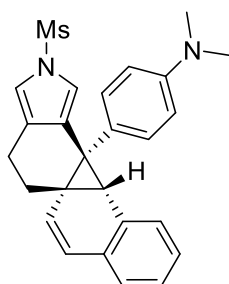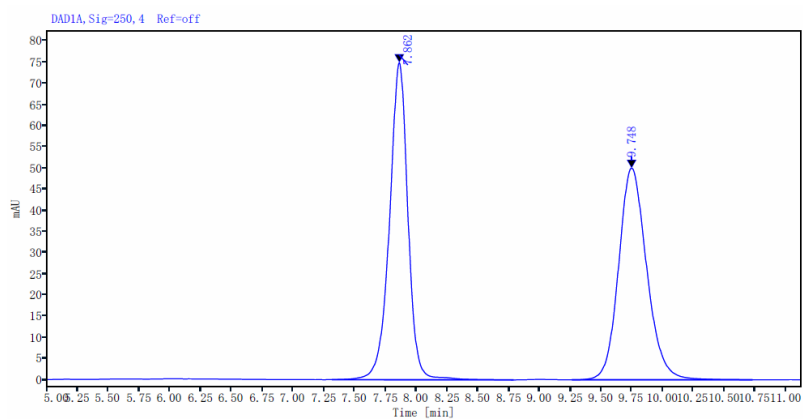

Signal: DAD1A, Sig=250, 4 Ref=off

| RetTime [min] | Type | Width [min] | Area [mAU*s] | Height [mAU] | Area %   |
|---------------|------|-------------|--------------|--------------|----------|
| 7.86187       | BB   | 1.47333     | 782.68547    | 74.91899     | 49.64307 |
| 9.74762       | BB   | 1.46667     | 793.94045    | 49.99458     | 50.35693 |
| Totals:       |      |             | 1576.62592   |              |          |

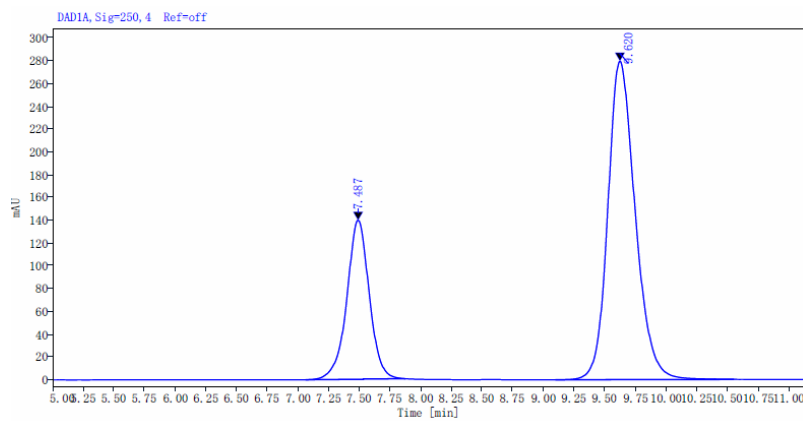

Signal: DAD1A, Sig=250, 4 Ref=off

| RetTime [min] | Type | Width [min] | Area [mAU*s] | Height [mAU] | Area %   |
|---------------|------|-------------|--------------|--------------|----------|
| 7.48679       | MM m | 0.81050     | 1774.41131   | 139.52239    | 28.99429 |
| 9.62042       | EM m | 1.45341     | 4345.45286   | 279.59271    | 71.00571 |
| Totals:       |      |             | 6119.86418   |              |          |

**4aj: IA**, *i*-PrOH/hexane = 10/90,  $v = 1.0$  mL/min,  $\lambda = 254$  nm

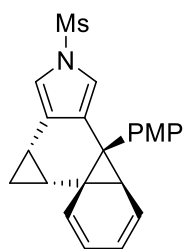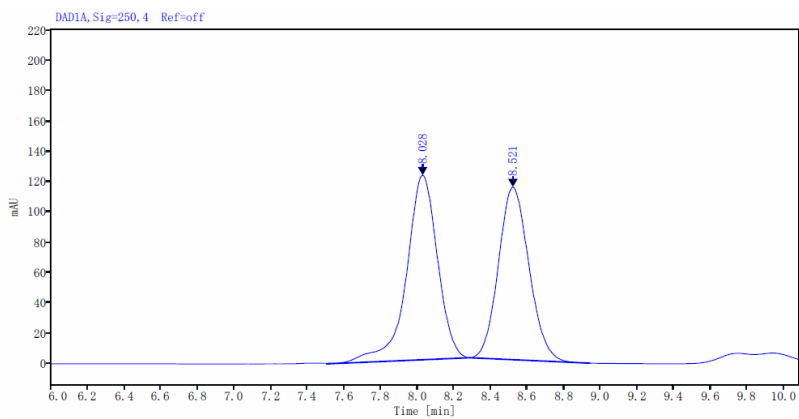

Signal: DADIA, Sig=250, 4 Ref=off

| RetTime [min] | Type | Width [min] | Area [mAU*s] | Height [mAU] | Area %   |
|---------------|------|-------------|--------------|--------------|----------|
| 8.02832       | VM m | 0.78065     | 1436.59326   | 121.96390    | 52.07792 |
| 8.52077       | MM m | 0.65814     | 1321.95245   | 114.08904    | 47.92208 |
| Totals:       |      |             | 2758.54571   |              |          |

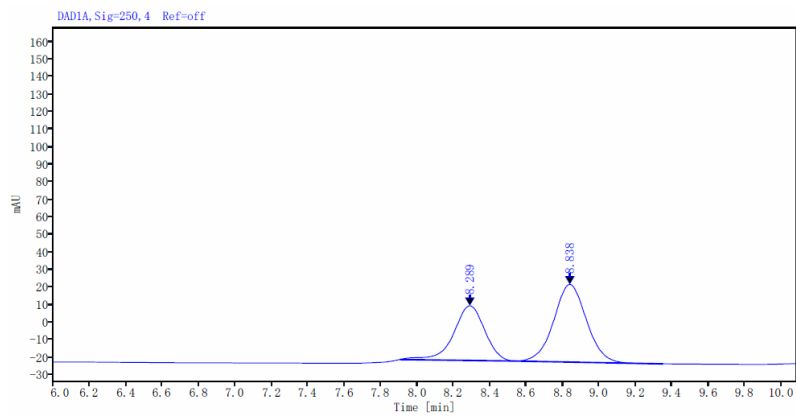

Signal: DADIA, Sig=250, 4 Ref=off

| RetTime [min] | Type | Width [min] | Area [mAU*s] | Height [mAU] | Area %   |
|---------------|------|-------------|--------------|--------------|----------|
| 8.28884       | MM m | 0.62583     | 369.90344    | 31.19948     | 40.04620 |
| 8.83773       | MM m | 0.82076     | 553.78835    | 44.28689     | 59.95380 |
| Totals:       |      |             | 923.69179    |              |          |



5a: IE, *i*-PrOH/hexane = 20/80,  $v = 1.0$  mL/min,  $\lambda = 254$  nm

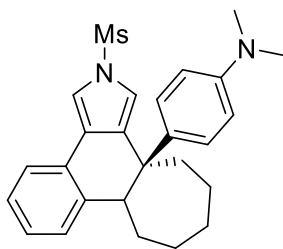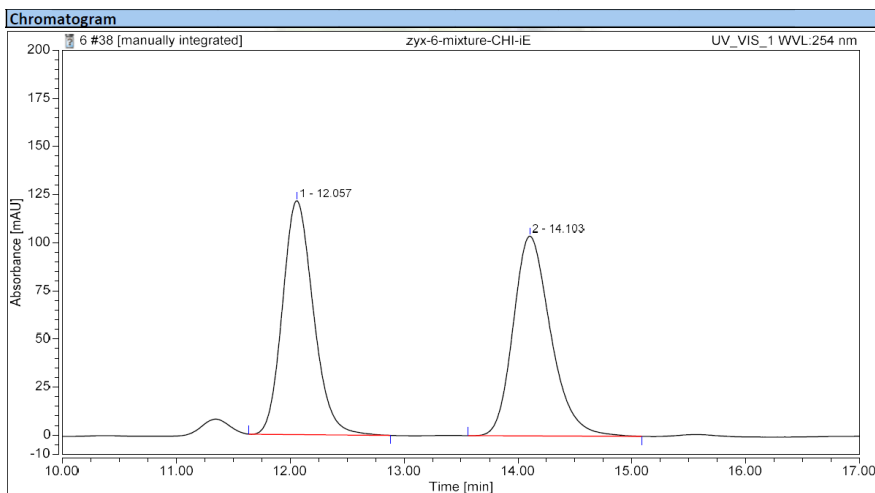

**Integration Results**

| No.           | Peak Name | Retention Time min | Area mAU*min  | Height mAU     | Relative Area % | Relative Height % | Amount |
|---------------|-----------|--------------------|---------------|----------------|-----------------|-------------------|--------|
| 1             |           | 12.057             | 38.202        | 121.481        | 49.11           | 53.94             | n.a.   |
| 2             |           | 14.103             | 39.585        | 103.754        | 50.89           | 46.06             | n.a.   |
| <b>Total:</b> |           |                    | <b>77.787</b> | <b>225.235</b> | <b>100.00</b>   | <b>100.00</b>     |        |

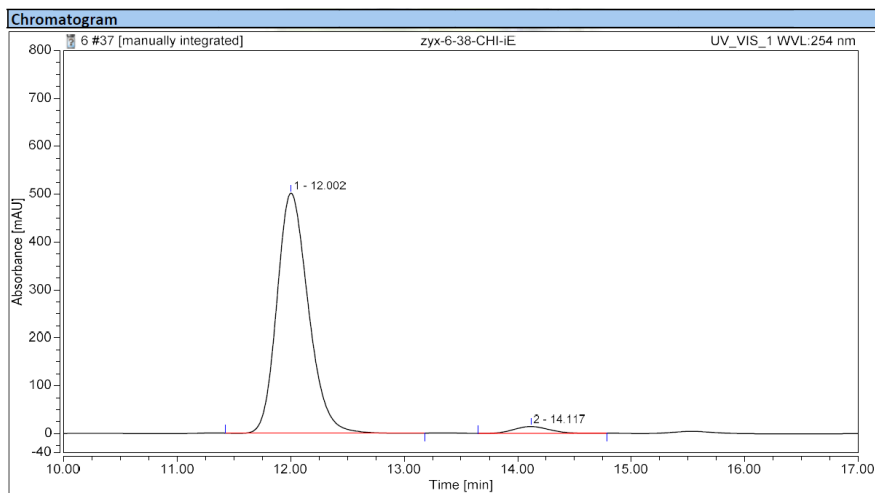

**Integration Results**

| No.           | Peak Name | Retention Time min | Area mAU*min   | Height mAU     | Relative Area % | Relative Height % | Amount |
|---------------|-----------|--------------------|----------------|----------------|-----------------|-------------------|--------|
| 1             |           | 12.002             | 160.238        | 501.426        | 96.96           | 97.27             | n.a.   |
| 2             |           | 14.117             | 5.031          | 14.087         | 3.04            | 2.73              | n.a.   |
| <b>Total:</b> |           |                    | <b>165.268</b> | <b>515.512</b> | <b>100.00</b>   | <b>100.00</b>     |        |

5b: **IE**, *i*-PrOH/hexane = 20/80,  $v = 1.0$  mL/min,  $\lambda = 254$  nm

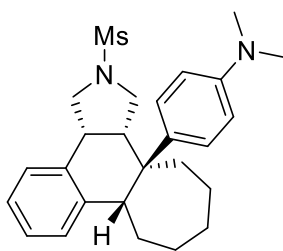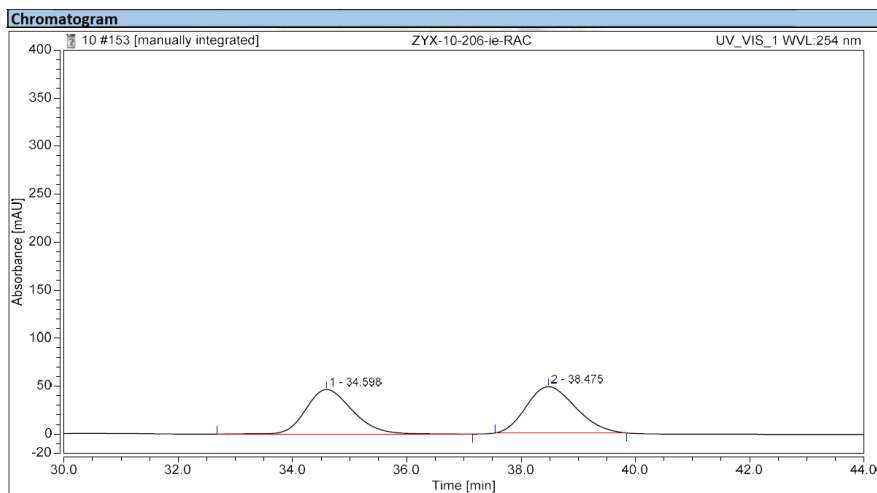

**Integration Results**

| No.           | Peak Name | Retention Time<br>min | Area<br>mAU*min | Height<br>mAU | Relative Area<br>% | Relative Height<br>% | Amount<br>n.a. |
|---------------|-----------|-----------------------|-----------------|---------------|--------------------|----------------------|----------------|
| 1             |           | 34.598                | 43.907          | 46.386        | 47.78              | 49.07                | n.a.           |
| 2             |           | 38.475                | 47.991          | 48.141        | 52.22              | 50.93                | n.a.           |
| <b>Total:</b> |           |                       | <b>91.898</b>   | <b>94.527</b> | <b>100.00</b>      | <b>100.00</b>        |                |

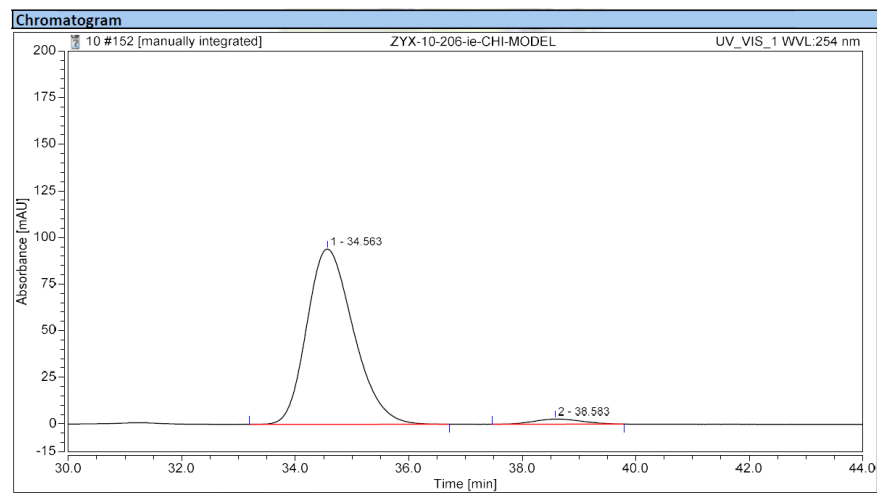

**Integration Results**

| No.           | Peak Name | Retention Time<br>min | Area<br>mAU*min | Height<br>mAU | Relative Area<br>% | Relative Height<br>% | Amount<br>n.a. |
|---------------|-----------|-----------------------|-----------------|---------------|--------------------|----------------------|----------------|
| 1             |           | 34.563                | 89.604          | 94.026        | 97.04              | 97.13                | n.a.           |
| 2             |           | 38.583                | 2.730           | 2.776         | 2.96               | 2.87                 | n.a.           |
| <b>Total:</b> |           |                       | <b>92.334</b>   | <b>96.802</b> | <b>100.00</b>      | <b>100.00</b>        |                |

5c: IE, *i*-PrOH/hexane = 30/70,  $v = 1.0$  mL/min,  $\lambda = 254$  nm

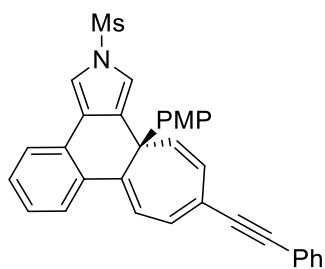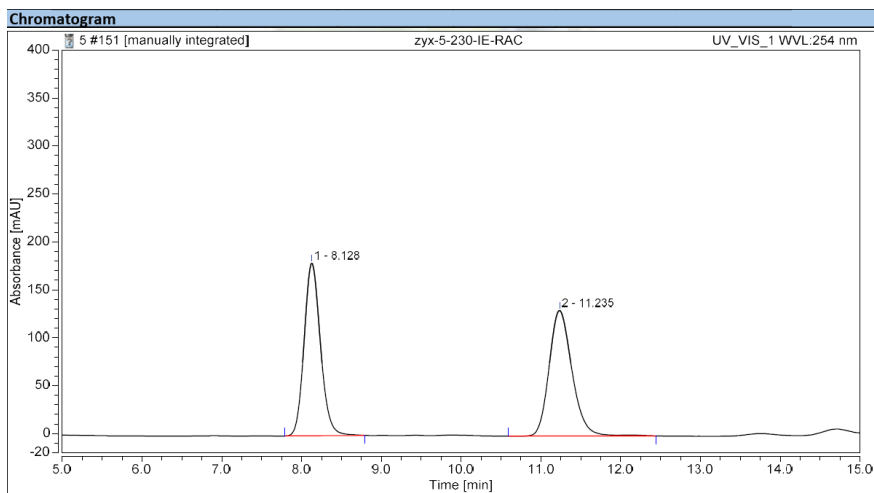

**Integration Results**

| No.           | Peak Name | Retention Time<br>min | Area<br>mAU*min | Height<br>mAU  | Relative Area<br>% | Relative Height<br>% | Amount<br>n.a. |
|---------------|-----------|-----------------------|-----------------|----------------|--------------------|----------------------|----------------|
| 1             |           | 8.128                 | 42.689          | 180.269        | 49.61              | 57.93                | n.a.           |
| 2             |           | 11.235                | 43.365          | 130.918        | 50.39              | 42.07                | n.a.           |
| <b>Total:</b> |           |                       | <b>86.054</b>   | <b>311.187</b> | <b>100.00</b>      | <b>100.00</b>        |                |

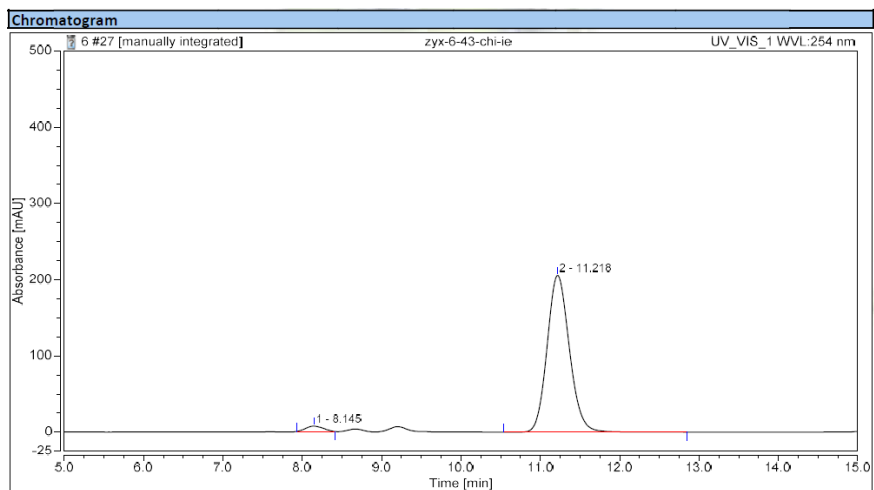

**Integration Results**

| No.           | Peak Name | Retention Time<br>min | Area<br>mAU*min | Height<br>mAU  | Relative Area<br>% | Relative Height<br>% | Amount<br>n.a. |
|---------------|-----------|-----------------------|-----------------|----------------|--------------------|----------------------|----------------|
| 1             |           | 8.145                 | 1.717           | 7.003          | 2.50               | 3.29                 | n.a.           |
| 2             |           | 11.218                | 66.952          | 205.918        | 97.50              | 96.71                | n.a.           |
| <b>Total:</b> |           |                       | <b>68.669</b>   | <b>212.922</b> | <b>100.00</b>      | <b>100.00</b>        |                |

5d: **IE**, *i*-PrOH/hexane = 40/60,  $v = 1.0$  mL/min,  $\lambda = 254$  nm

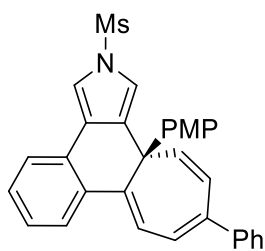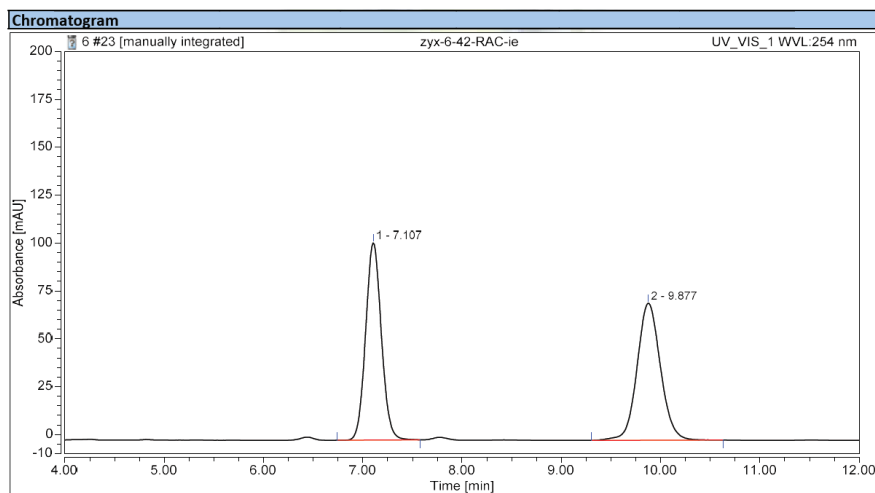

**Integration Results**

| No.           | Peak Name | Retention Time min | Area mAU*min  | Height mAU     | Relative Area % | Relative Height % | Amount |
|---------------|-----------|--------------------|---------------|----------------|-----------------|-------------------|--------|
| 1             |           | 7.107              | 18.875        | 103.018        | 49.11           | 59.01             | n.a.   |
| 2             |           | 9.877              | 19.556        | 71.570         | 50.89           | 40.99             | n.a.   |
| <b>Total:</b> |           |                    | <b>38.431</b> | <b>174.588</b> | <b>100.00</b>   | <b>100.00</b>     |        |

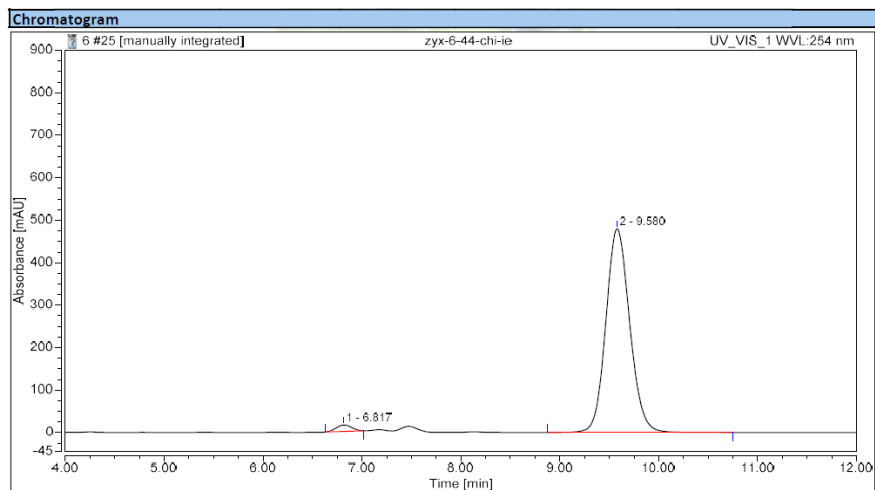

**Integration Results**

| No.           | Peak Name | Retention Time min | Area mAU*min   | Height mAU     | Relative Area % | Relative Height % | Amount |
|---------------|-----------|--------------------|----------------|----------------|-----------------|-------------------|--------|
| 1             |           | 6.817              | 2.771          | 15.381         | 2.02            | 3.11              | n.a.   |
| 2             |           | 9.580              | 134.299        | 479.791        | 97.98           | 96.89             | n.a.   |
| <b>Total:</b> |           |                    | <b>137.071</b> | <b>495.172</b> | <b>100.00</b>   | <b>100.00</b>     |        |

5e: IB, *i*-PrOH/hexane = 20/0,  $v = 1.0$  mL/min,  $\lambda = 254$  nm

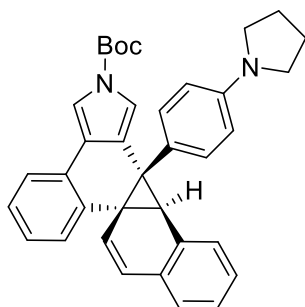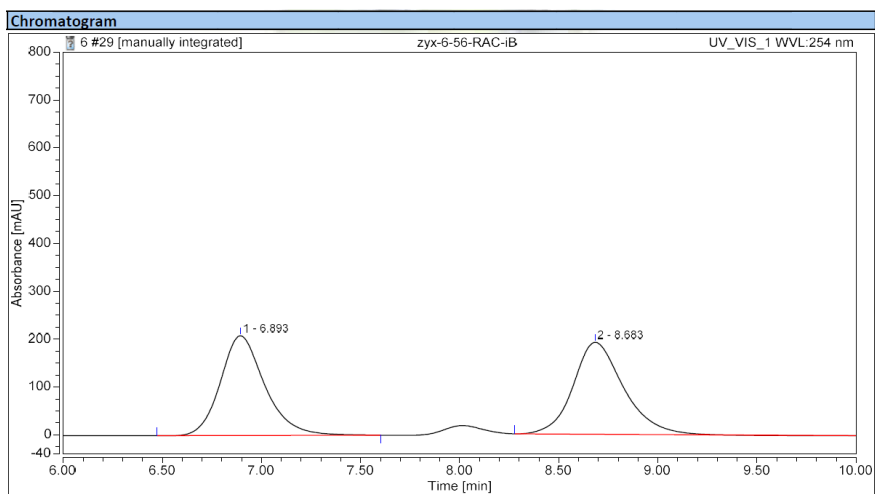

**Integration Results**

| No.           | Peak Name | Retention Time min | Area mAU*min   | Height mAU     | Relative Area % | Relative Height % | Amount |
|---------------|-----------|--------------------|----------------|----------------|-----------------|-------------------|--------|
| 1             |           | 6.893              | 54.246         | 208.529        | 49.00           | 52.05             | n.a.   |
| 2             |           | 8.683              | 56.449         | 192.139        | 51.00           | 47.95             | n.a.   |
| <b>Total:</b> |           |                    | <b>110.696</b> | <b>400.668</b> | <b>100.00</b>   | <b>100.00</b>     |        |

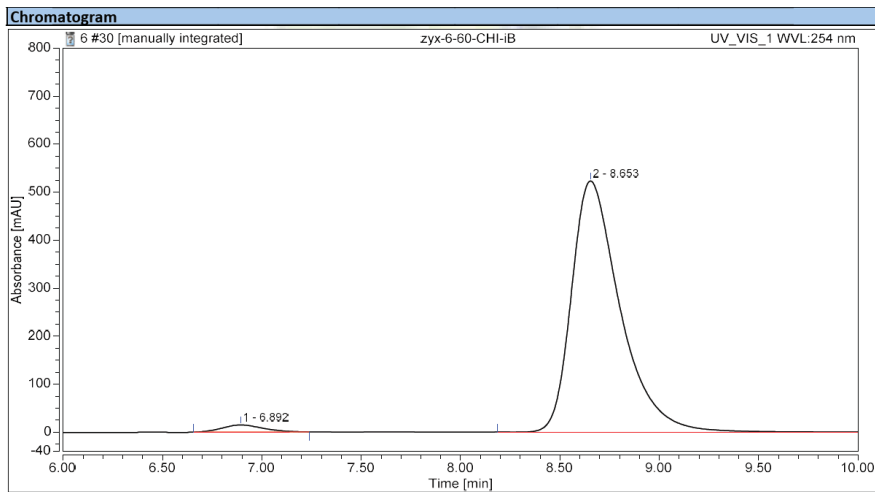

**Integration Results**

| No.           | Peak Name | Retention Time min | Area mAU*min   | Height mAU     | Relative Area % | Relative Height % | Amount |
|---------------|-----------|--------------------|----------------|----------------|-----------------|-------------------|--------|
| 1             |           | 6.892              | 3.525          | 14.844         | 2.33            | 2.76              | n.a.   |
| 2             |           | 8.653              | 147.959        | 523.004        | 97.67           | 97.24             | n.a.   |
| <b>Total:</b> |           |                    | <b>151.484</b> | <b>537.848</b> | <b>100.00</b>   | <b>100.00</b>     |        |

5f: IE, *i*-PrOH/hexane = 30/70,  $v = 1.0$  mL/min,  $\lambda = 254$  nm

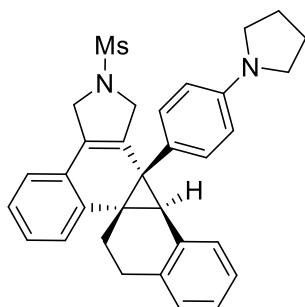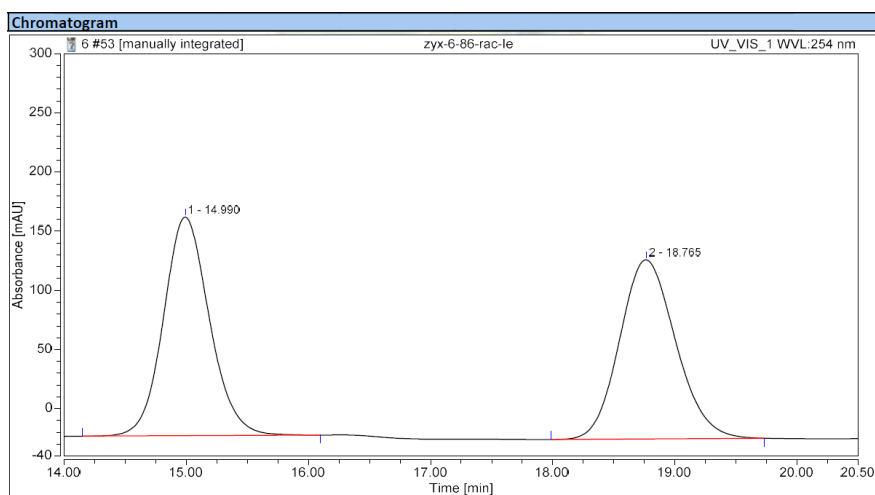

**Integration Results**

| No.           | Peak Name | Retention Time<br>min | Area<br>mAU*min | Height<br>mAU  | Relative Area<br>% | Relative Height<br>% | Amount<br>n.a. |
|---------------|-----------|-----------------------|-----------------|----------------|--------------------|----------------------|----------------|
| 1             |           | 14.990                | 80.800          | 184.796        | 50.09              | 54.97                | n.a.           |
| 2             |           | 18.765                | 80.509          | 151.353        | 49.91              | 45.03                | n.a.           |
| <b>Total:</b> |           |                       | <b>161.309</b>  | <b>336.149</b> | <b>100.00</b>      | <b>100.00</b>        |                |

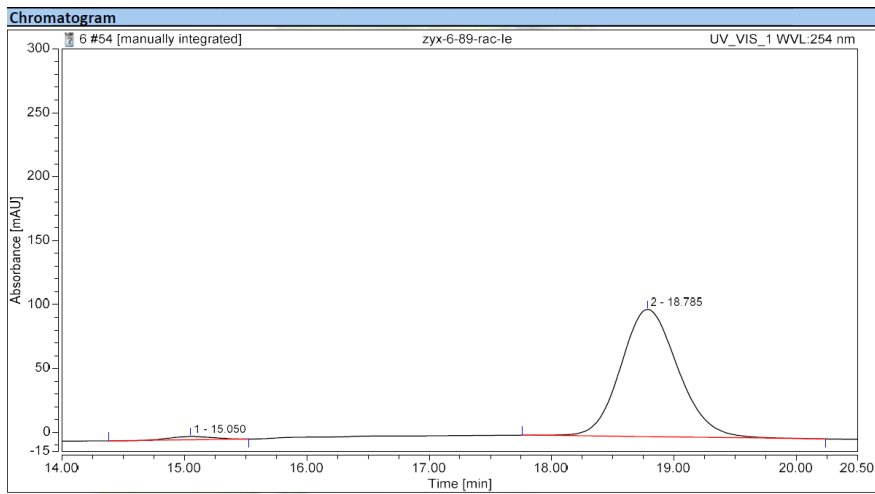

**Integration Results**

| No.           | Peak Name | Retention Time<br>min | Area<br>mAU*min | Height<br>mAU  | Relative Area<br>% | Relative Height<br>% | Amount<br>n.a. |
|---------------|-----------|-----------------------|-----------------|----------------|--------------------|----------------------|----------------|
| 1             |           | 15.050                | 1.054           | 2.605          | 1.91               | 2.55                 | n.a.           |
| 2             |           | 18.785                | 54.097          | 99.507         | 98.09              | 97.45                | n.a.           |
| <b>Total:</b> |           |                       | <b>55.151</b>   | <b>102.112</b> | <b>100.00</b>      | <b>100.00</b>        |                |

5g: IC, *i*-PrOH/hexane = 50/50,  $v = 1.0$  mL/min,  $\lambda = 254$  nm

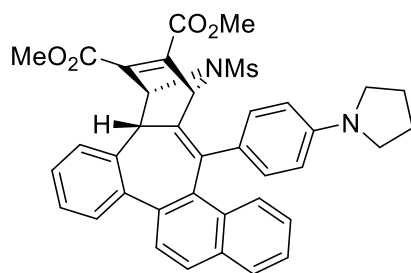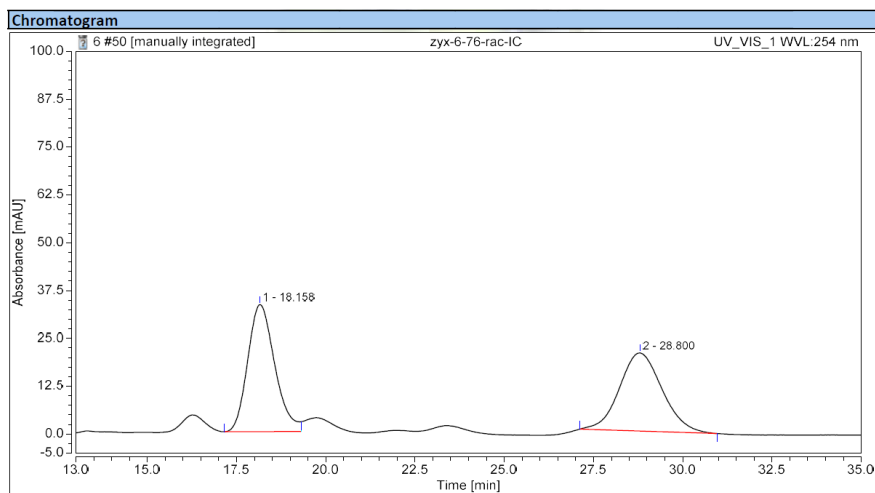

**Integration Results**

| No.           | Peak Name | Retention Time<br>min | Area<br>mAU*min | Height<br>mAU | Relative Area<br>% | Relative Height<br>% | Amount<br>n.a. |
|---------------|-----------|-----------------------|-----------------|---------------|--------------------|----------------------|----------------|
| 1             |           | 18.158                | 29.146          | 33.202        | 50.77              | 61.93                | n.a.           |
| 2             |           | 28.800                | 28.266          | 20.411        | 49.23              | 38.07                | n.a.           |
| <b>Total:</b> |           |                       | <b>57.412</b>   | <b>53.613</b> | <b>100.00</b>      | <b>100.00</b>        |                |

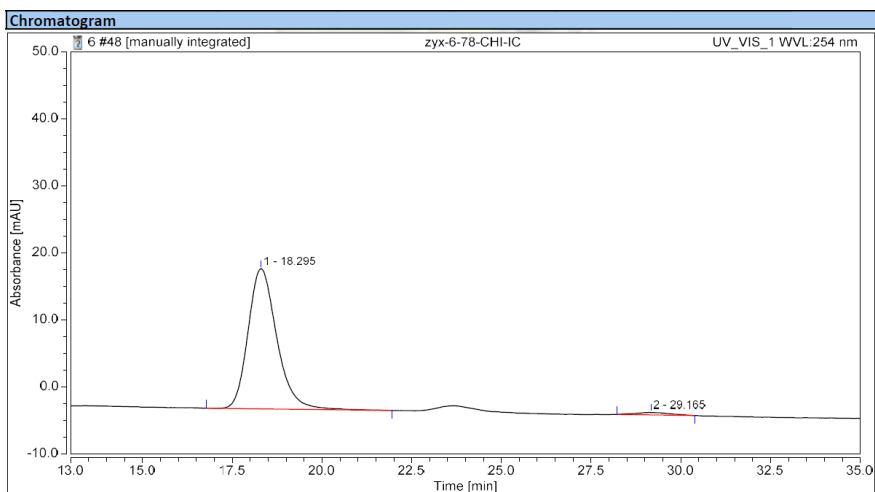

**Integration Results**

| No.           | Peak Name | Retention Time<br>min | Area<br>mAU*min | Height<br>mAU | Relative Area<br>% | Relative Height<br>% | Amount<br>n.a. |
|---------------|-----------|-----------------------|-----------------|---------------|--------------------|----------------------|----------------|
| 1             |           | 18.295                | 19.420          | 20.913        | 98.03              | 98.30                | n.a.           |
| 2             |           | 29.165                | 0.390           | 0.362         | 1.97               | 1.70                 | n.a.           |
| <b>Total:</b> |           |                       | <b>19.809</b>   | <b>21.275</b> | <b>100.00</b>      | <b>100.00</b>        |                |

5h: **IE**, *i*-PrOH/hexane = 40/60,  $v = 1.0$  mL/min,  $\lambda = 254$  nm

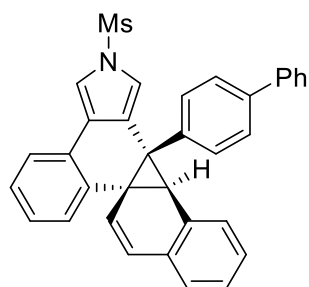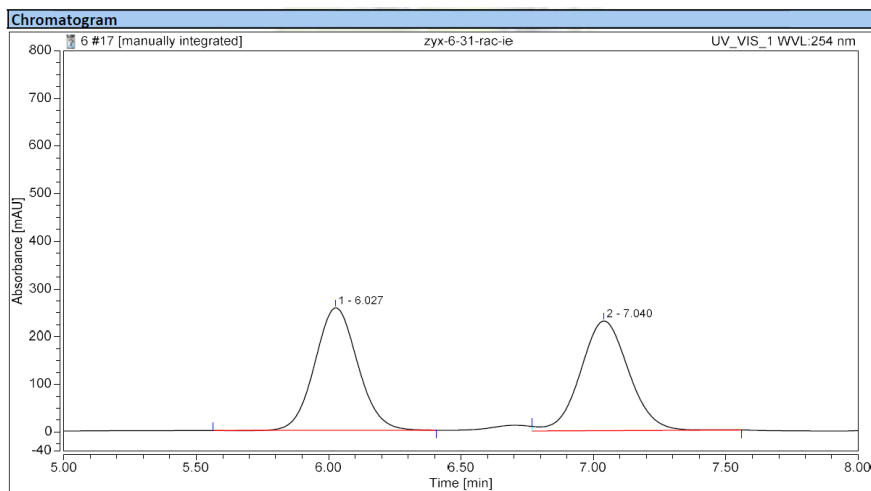

**Integration Results**

| No.           | Peak Name | Retention Time<br>min | Area<br>mAU*min | Height<br>mAU  | Relative Area<br>% | Relative Height<br>% | Amount<br>n.a. |
|---------------|-----------|-----------------------|-----------------|----------------|--------------------|----------------------|----------------|
| 1             |           | 6.027                 | 48.287          | 257.085        | 49.81              | 52.75                | n.a.           |
| 2             |           | 7.040                 | 48.661          | 230.242        | 50.19              | 47.25                | n.a.           |
| <b>Total:</b> |           |                       | <b>96.948</b>   | <b>487.327</b> | <b>100.00</b>      | <b>100.00</b>        |                |

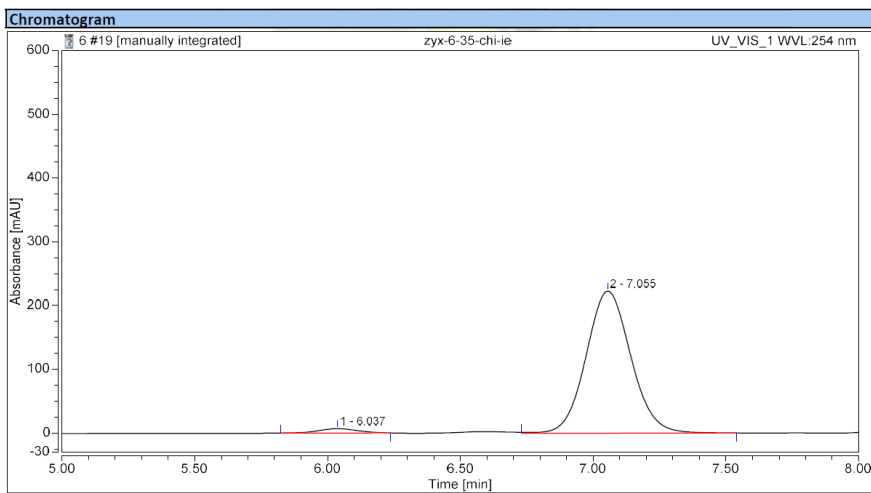

**Integration Results**

| No.           | Peak Name | Retention Time<br>min | Area<br>mAU*min | Height<br>mAU  | Relative Area<br>% | Relative Height<br>% | Amount<br>n.a. |
|---------------|-----------|-----------------------|-----------------|----------------|--------------------|----------------------|----------------|
| 1             |           | 6.037                 | 1.132           | 6.689          | 2.53               | 2.92                 | n.a.           |
| 2             |           | 7.055                 | 43.540          | 222.663        | 97.47              | 97.08                | n.a.           |
| <b>Total:</b> |           |                       | <b>44.672</b>   | <b>229.352</b> | <b>100.00</b>      | <b>100.00</b>        |                |



| Parameter                | Value               |
|--------------------------|---------------------|
| 1 Title                  | zyx-4-189-h         |
| 2 Origin                 | Bruker BioSpin GmbH |
| 3 Solvent                | CDCl3               |
| 4 Temperature            | 297.7               |
| 5 Number of Scans        | 12                  |
| 6 Acquisition Time       | 3.1719              |
| 7 Acquisition Date       | 2022-04-04T21:51:40 |
| 8 Spectrometer Frequency | 500.17              |
| 9 Spectral Width         | 10330.6             |

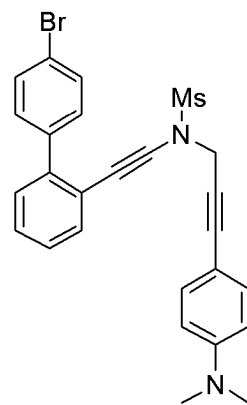

1a

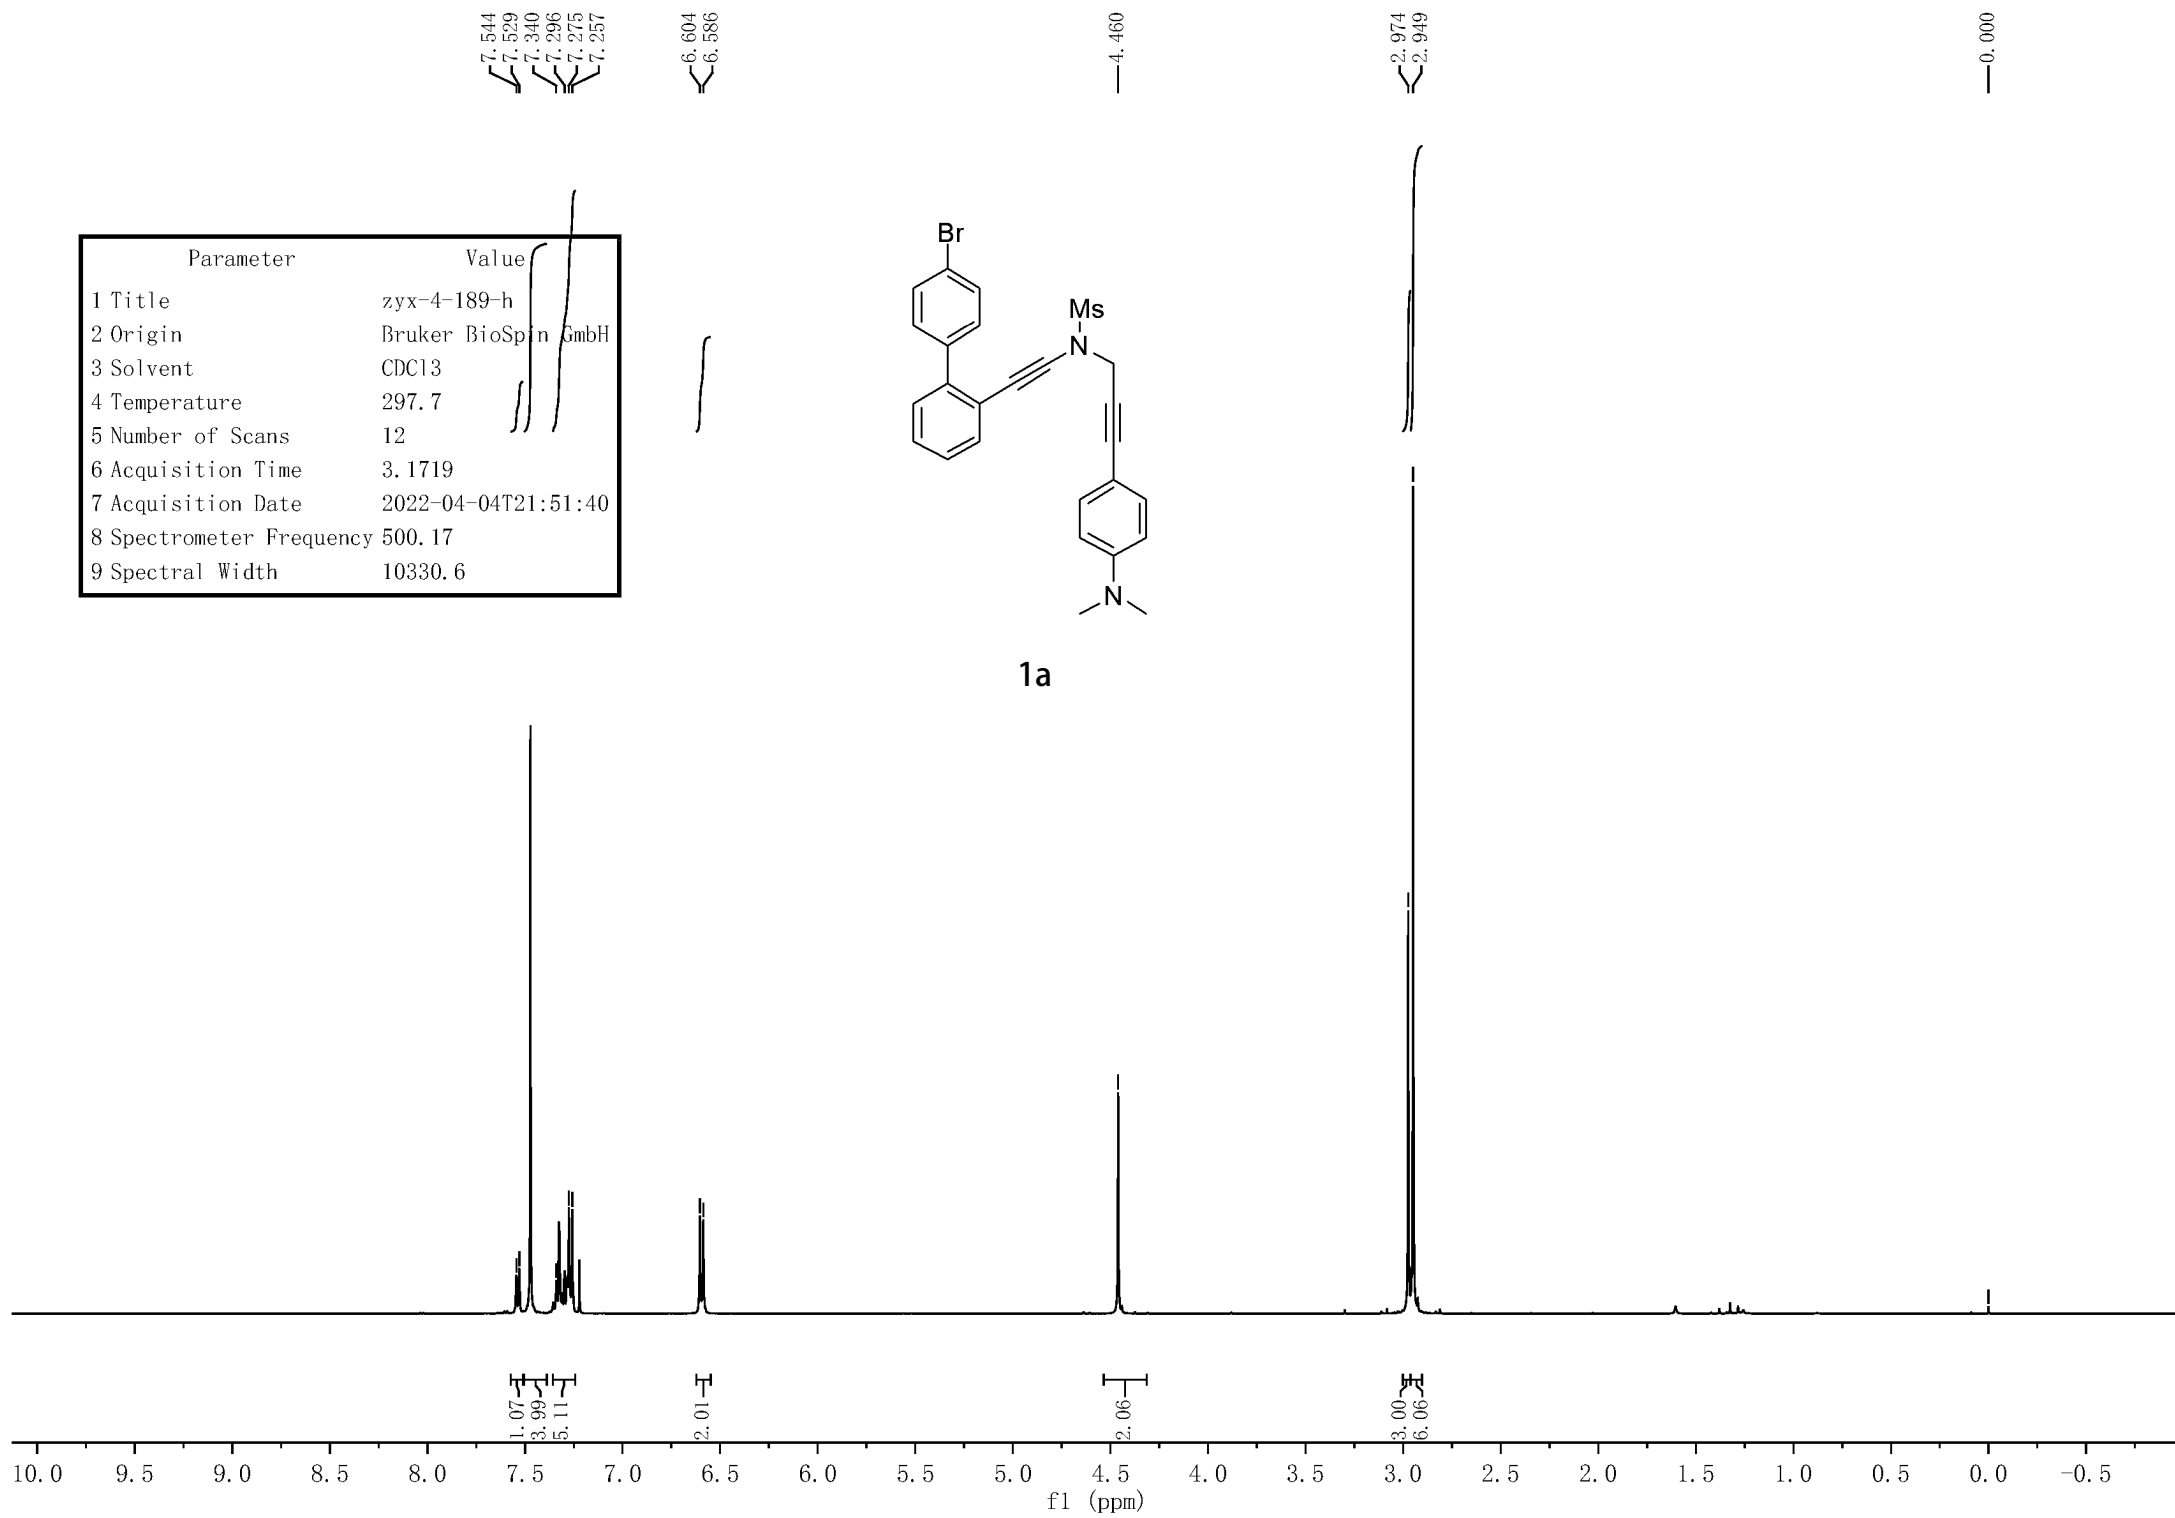

| Parameter                | Value               |
|--------------------------|---------------------|
| 1 Title                  | zyx-4-189-c         |
| 2 Origin                 | Bruker BioSpin GmbH |
| 3 Solvent                | CDC13               |
| 4 Temperature            | 297.9               |
| 5 Number of Scans        | 17                  |
| 6 Acquisition Time       | 1.1010              |
| 7 Acquisition Date       | 2022-04-04T21:53:13 |
| 8 Spectrometer Frequency | 125.77              |
| 9 Spectral Width         | 29761.9             |

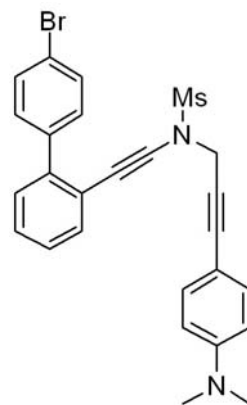

1a

150.47  
142.09  
139.31  
132.89  
132.70  
131.08  
130.88  
129.03  
127.34  
120.62  
111.64  
107.92

88.16  
84.68  
79.19  
77.25  
77.00  
76.75  
70.63

43.13  
40.01  
38.45

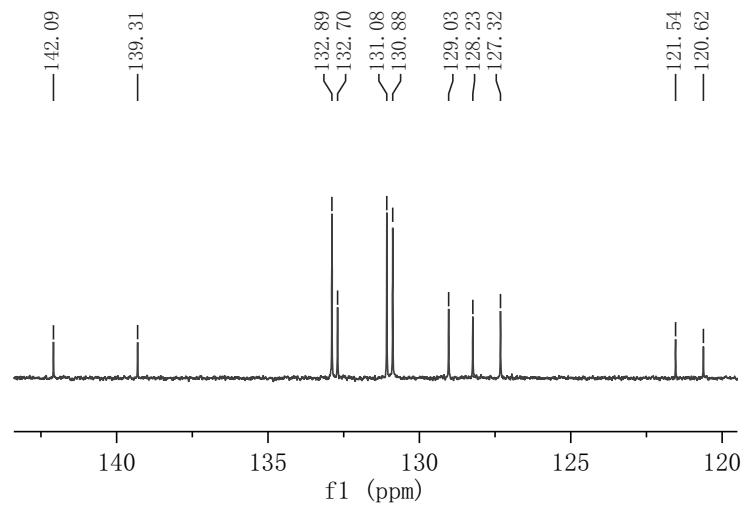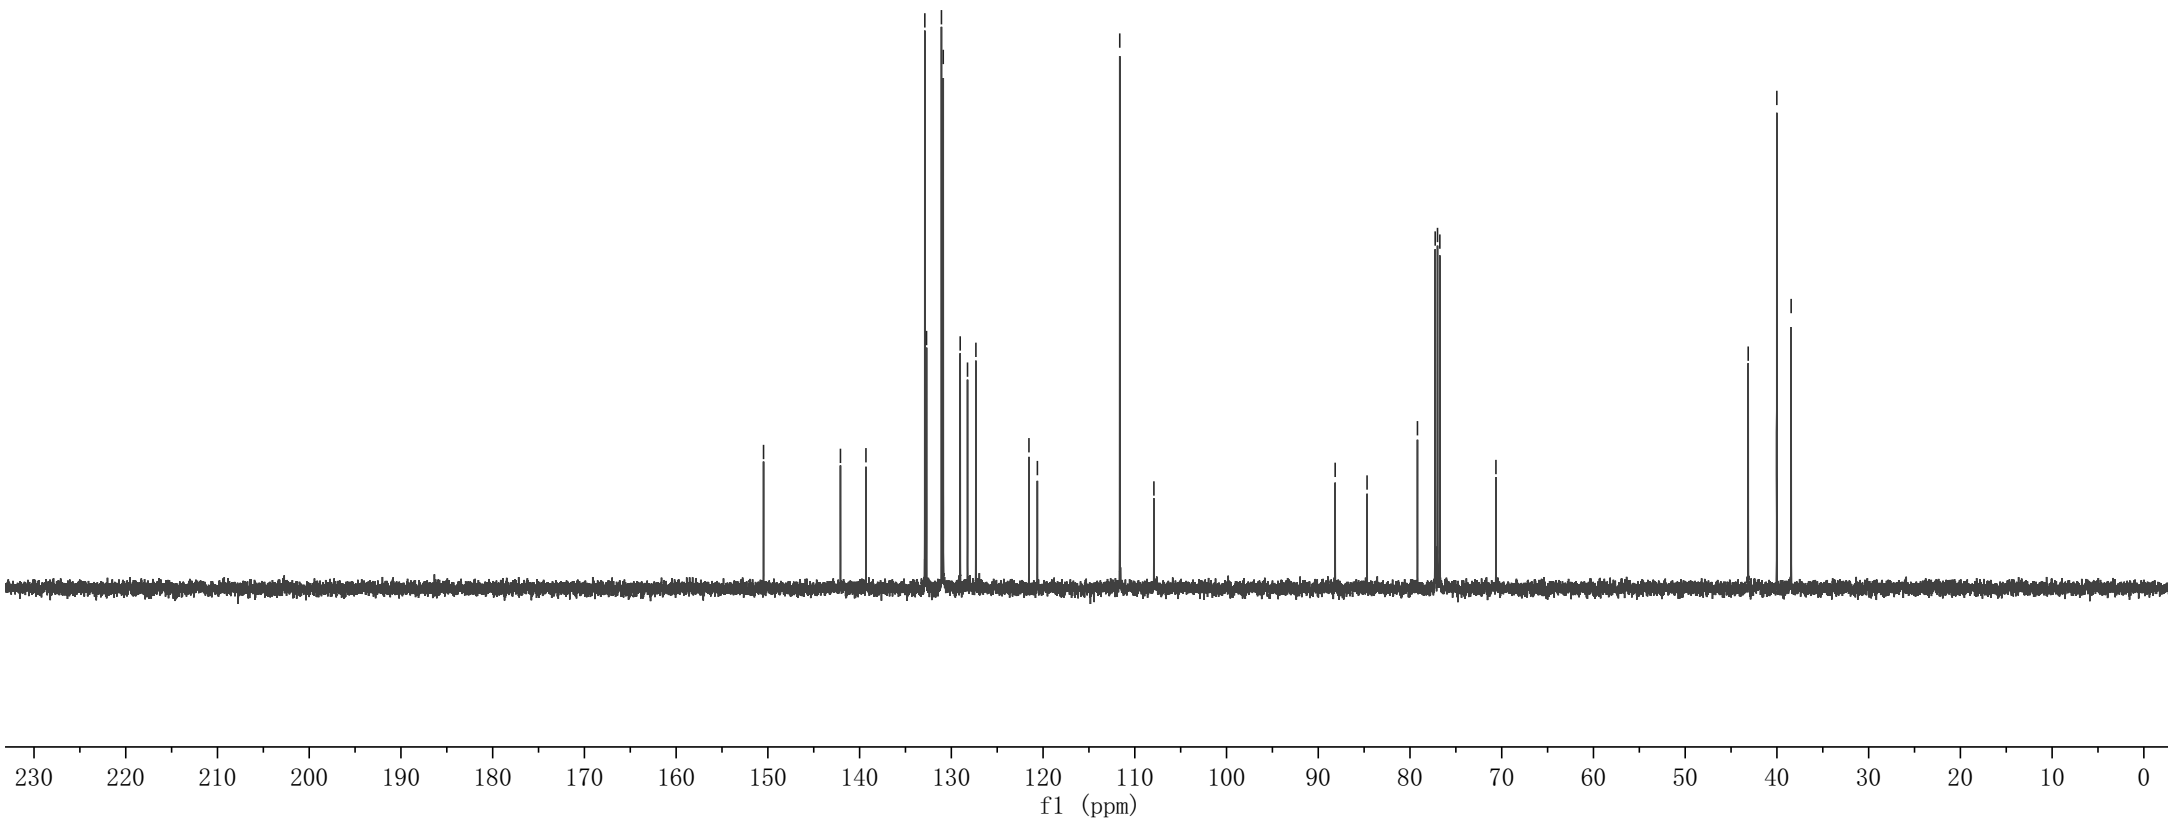

132.89  
132.70  
131.08  
130.88  
129.03  
128.23  
127.32

111.64

43.13  
40.01  
38.45

| Parameter                | Value               |
|--------------------------|---------------------|
| 1 Title                  | zyx-4-189-dept      |
| 2 Origin                 | Bruker BioSpin GmbH |
| 3 Solvent                | CDC13               |
| 4 Temperature            | 298.1               |
| 5 Number of Scans        | 7                   |
| 6 Acquisition Time       | 1.1010              |
| 7 Acquisition Date       | 2022-04-04T21:54:40 |
| 8 Spectrometer Frequency | 125.77              |
| 9 Spectral Width         | 29761.9             |

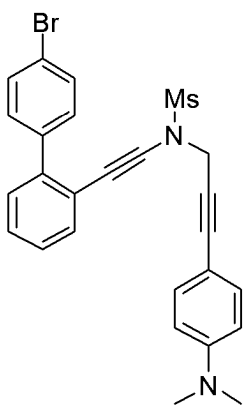

1a

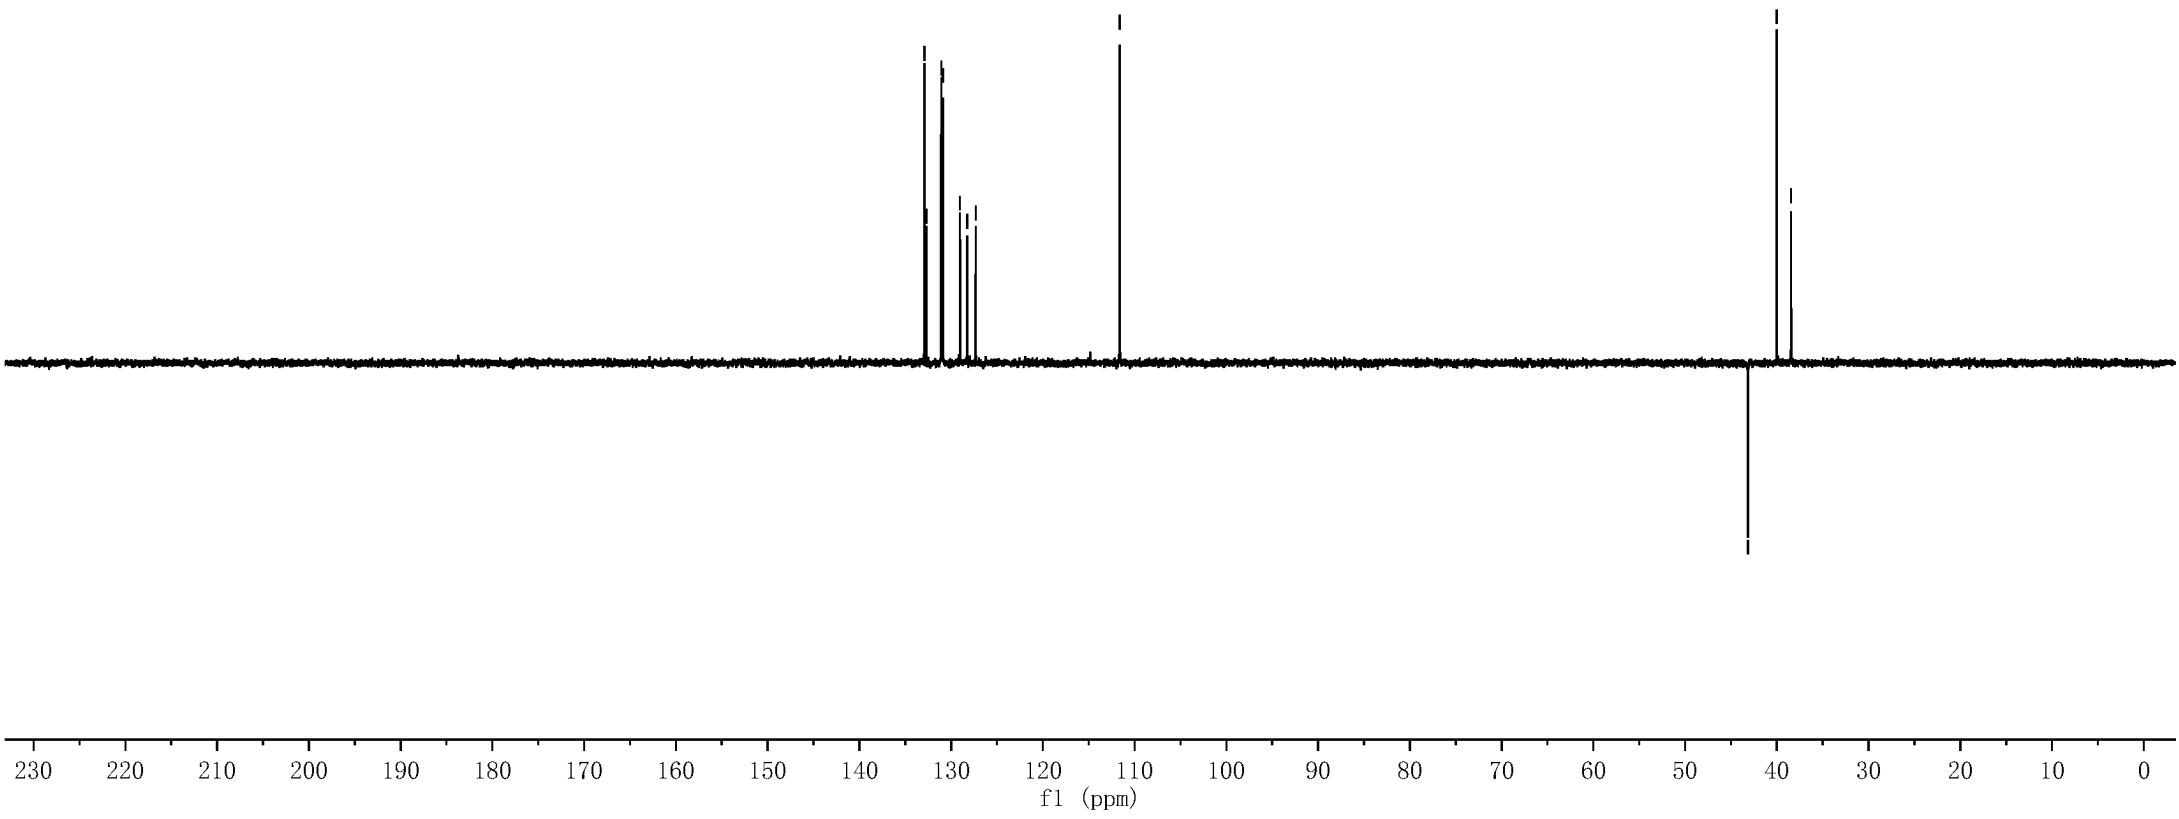

| Parameter                | Value               |
|--------------------------|---------------------|
| 1 Title                  | zyx-4-173-h         |
| 2 Origin                 | Bruker BioSpin GmbH |
| 3 Solvent                | CDCl3               |
| 4 Temperature            | 298.0               |
| 5 Number of Scans        | 6                   |
| 6 Acquisition Time       | 4.0894              |
| 7 Acquisition Date       | 2022-03-31T16:23:04 |
| 8 Spectrometer Frequency | 400.13              |
| 9 Spectral Width         | 8012.8              |

7.650  
7.630  
7.523  
7.504  
7.473  
7.452  
7.431  
7.409  
7.315  
7.289  
7.254  
7.181  
7.161  
7.029  
7.007  
6.551  
6.529

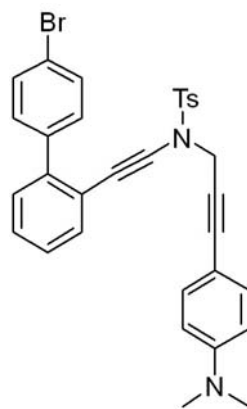

**1b**

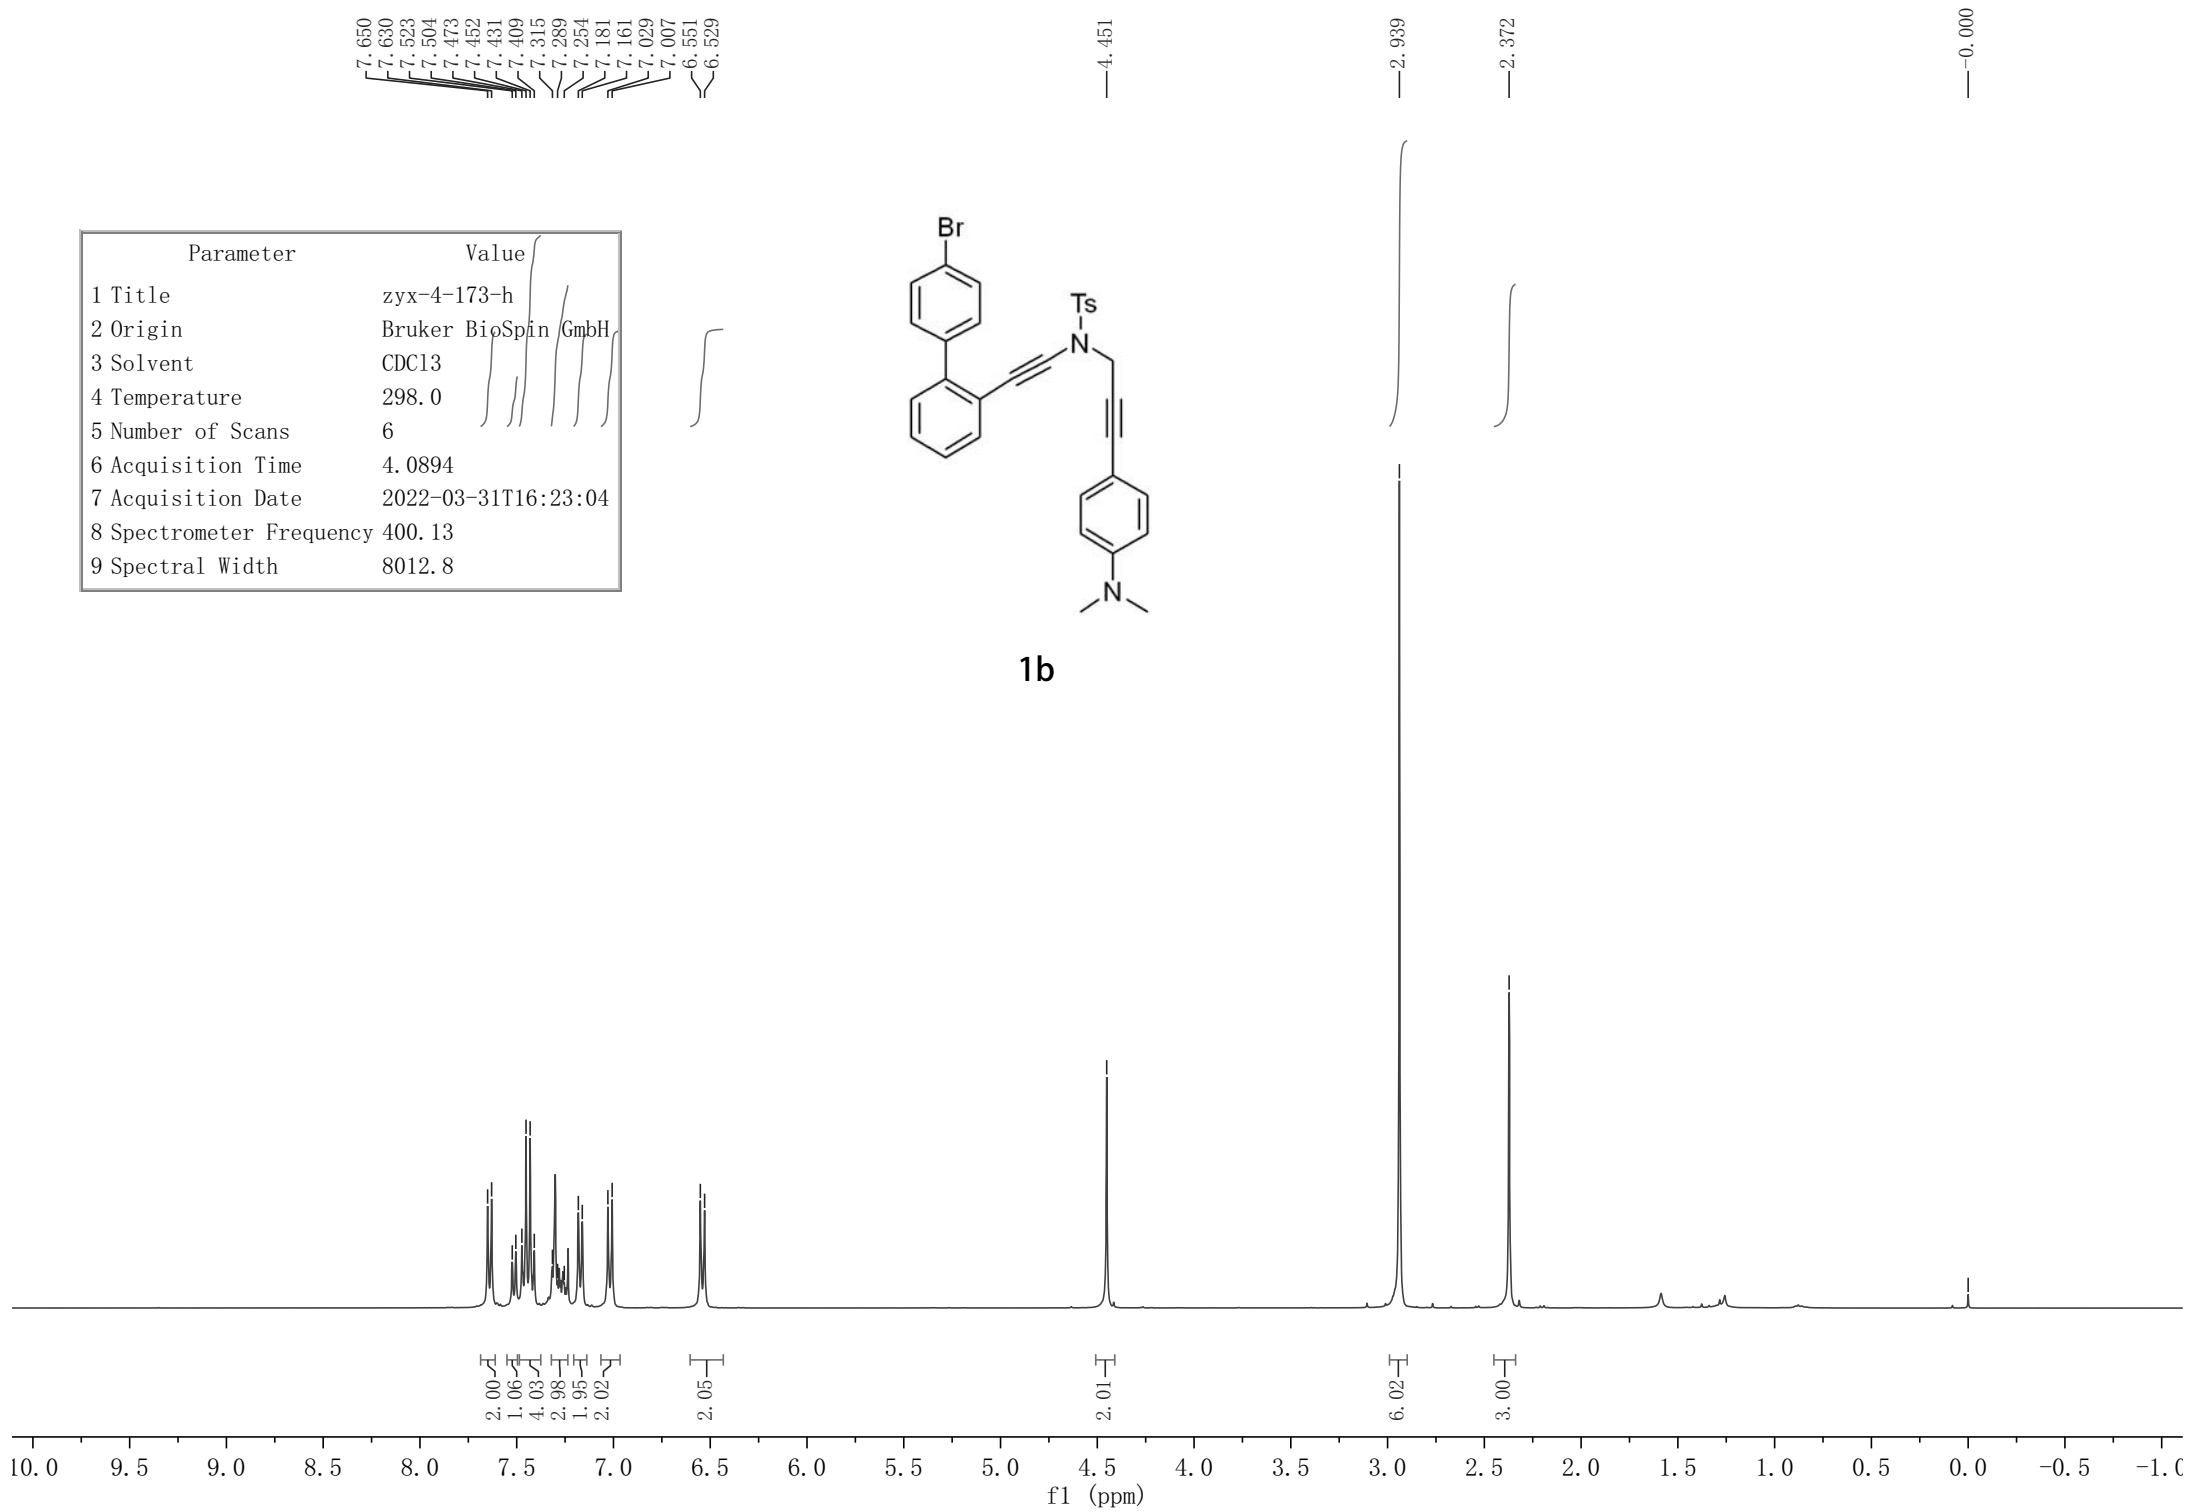

| Parameter                | Value               |
|--------------------------|---------------------|
| 1 Title                  | zyx-4-173-c         |
| 2 Origin                 | Bruker BioSpin GmbH |
| 3 Solvent                | CDC13               |
| 4 Temperature            | 300.0               |
| 5 Number of Scans        | 49                  |
| 6 Acquisition Time       | 1.3631              |
| 7 Acquisition Date       | 2022-03-31T16:24:15 |
| 8 Spectrometer Frequency | 100.61              |
| 9 Spectral Width         | 24038.5             |

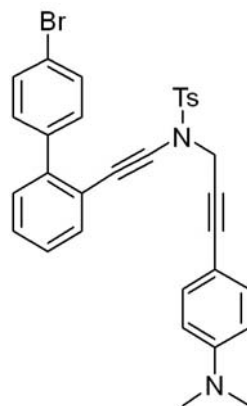

**1b**

150.25 144.58 141.77 139.31 133.18 132.79 131.11 130.87 129.50 127.86 120.96 111.52 108.55 87.49 85.21 78.85 77.32 77.00 76.68 70.35 42.99 40.09 21.62

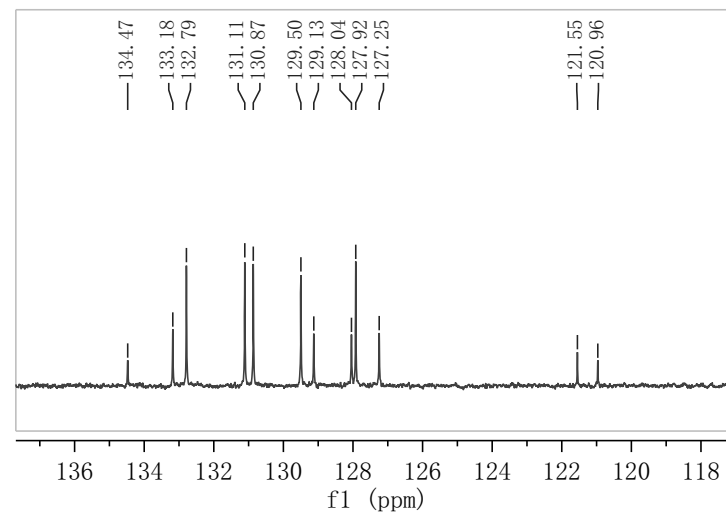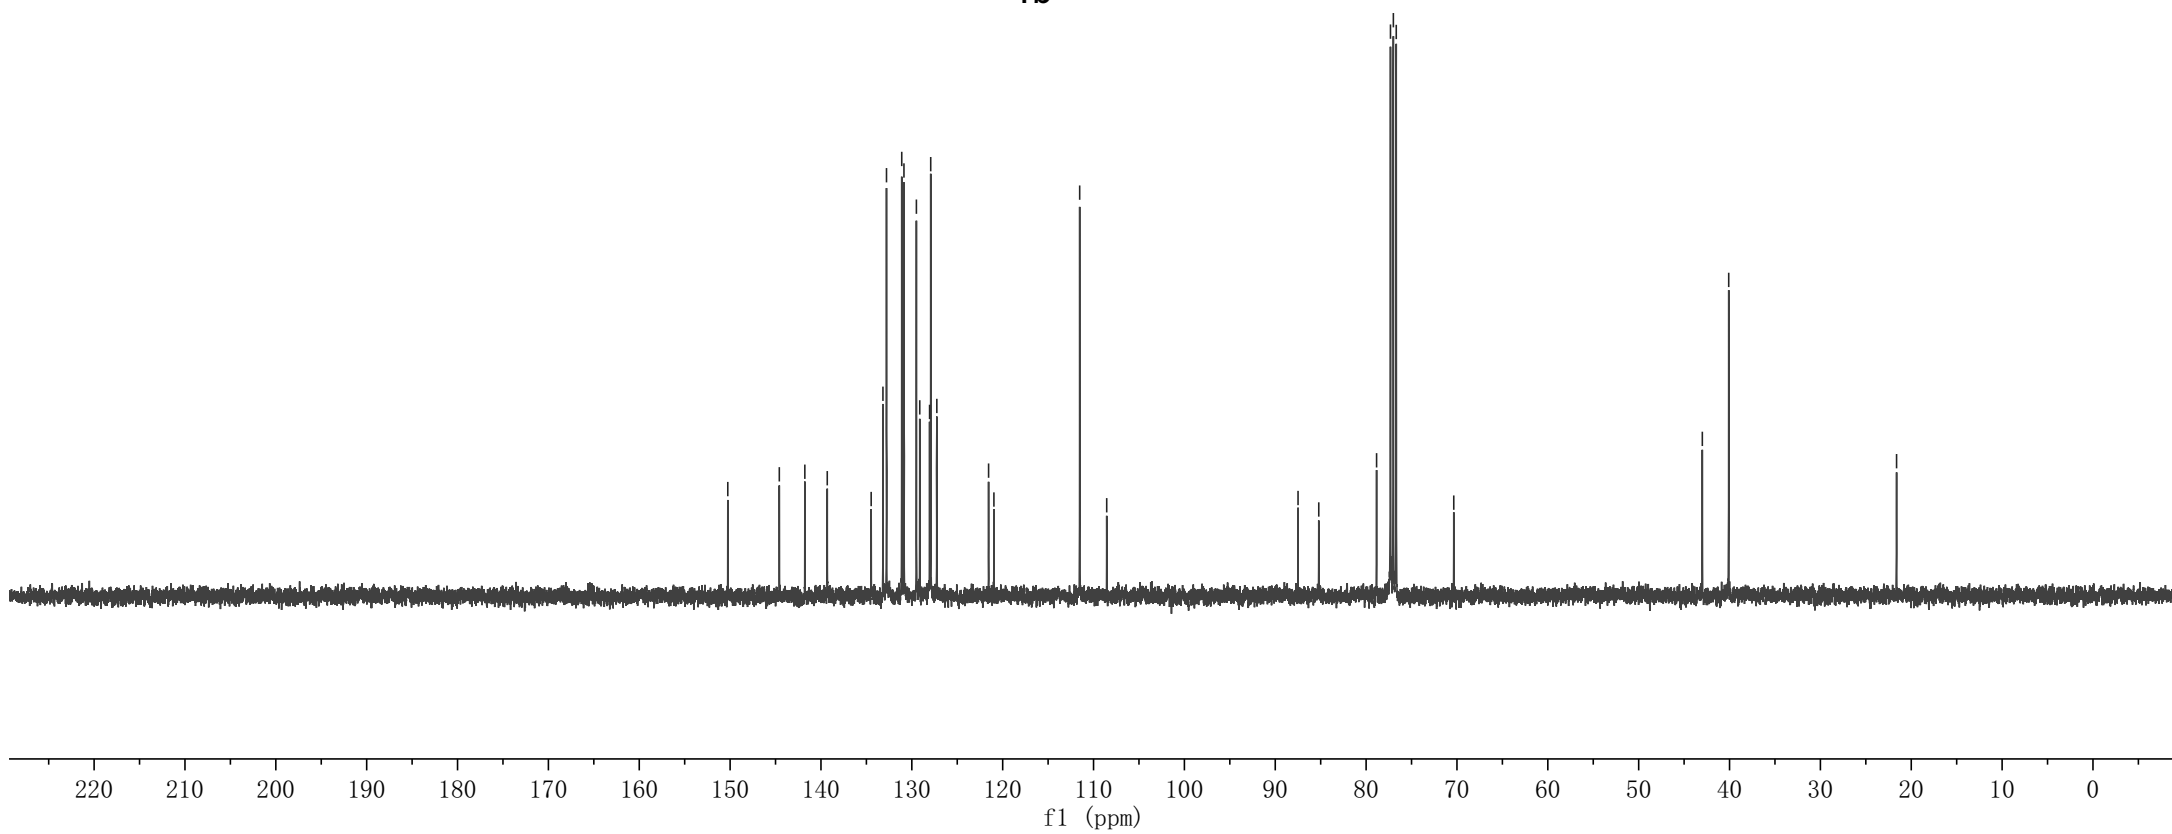

| Parameter                | Value               |
|--------------------------|---------------------|
| 1 Title                  | ZYX-4-191-H         |
| 2 Origin                 | Bruker BioSpin GmbH |
| 3 Solvent                | CDCl3               |
| 4 Temperature            | 297.4               |
| 5 Number of Scans        | 15                  |
| 6 Acquisition Time       | 3.1719              |
| 7 Acquisition Date       | 2022-04-06T09:38:45 |
| 8 Spectrometer Frequency | 500.17              |
| 9 Spectral Width         | 10330.6             |

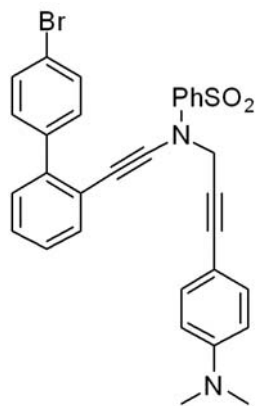

1c

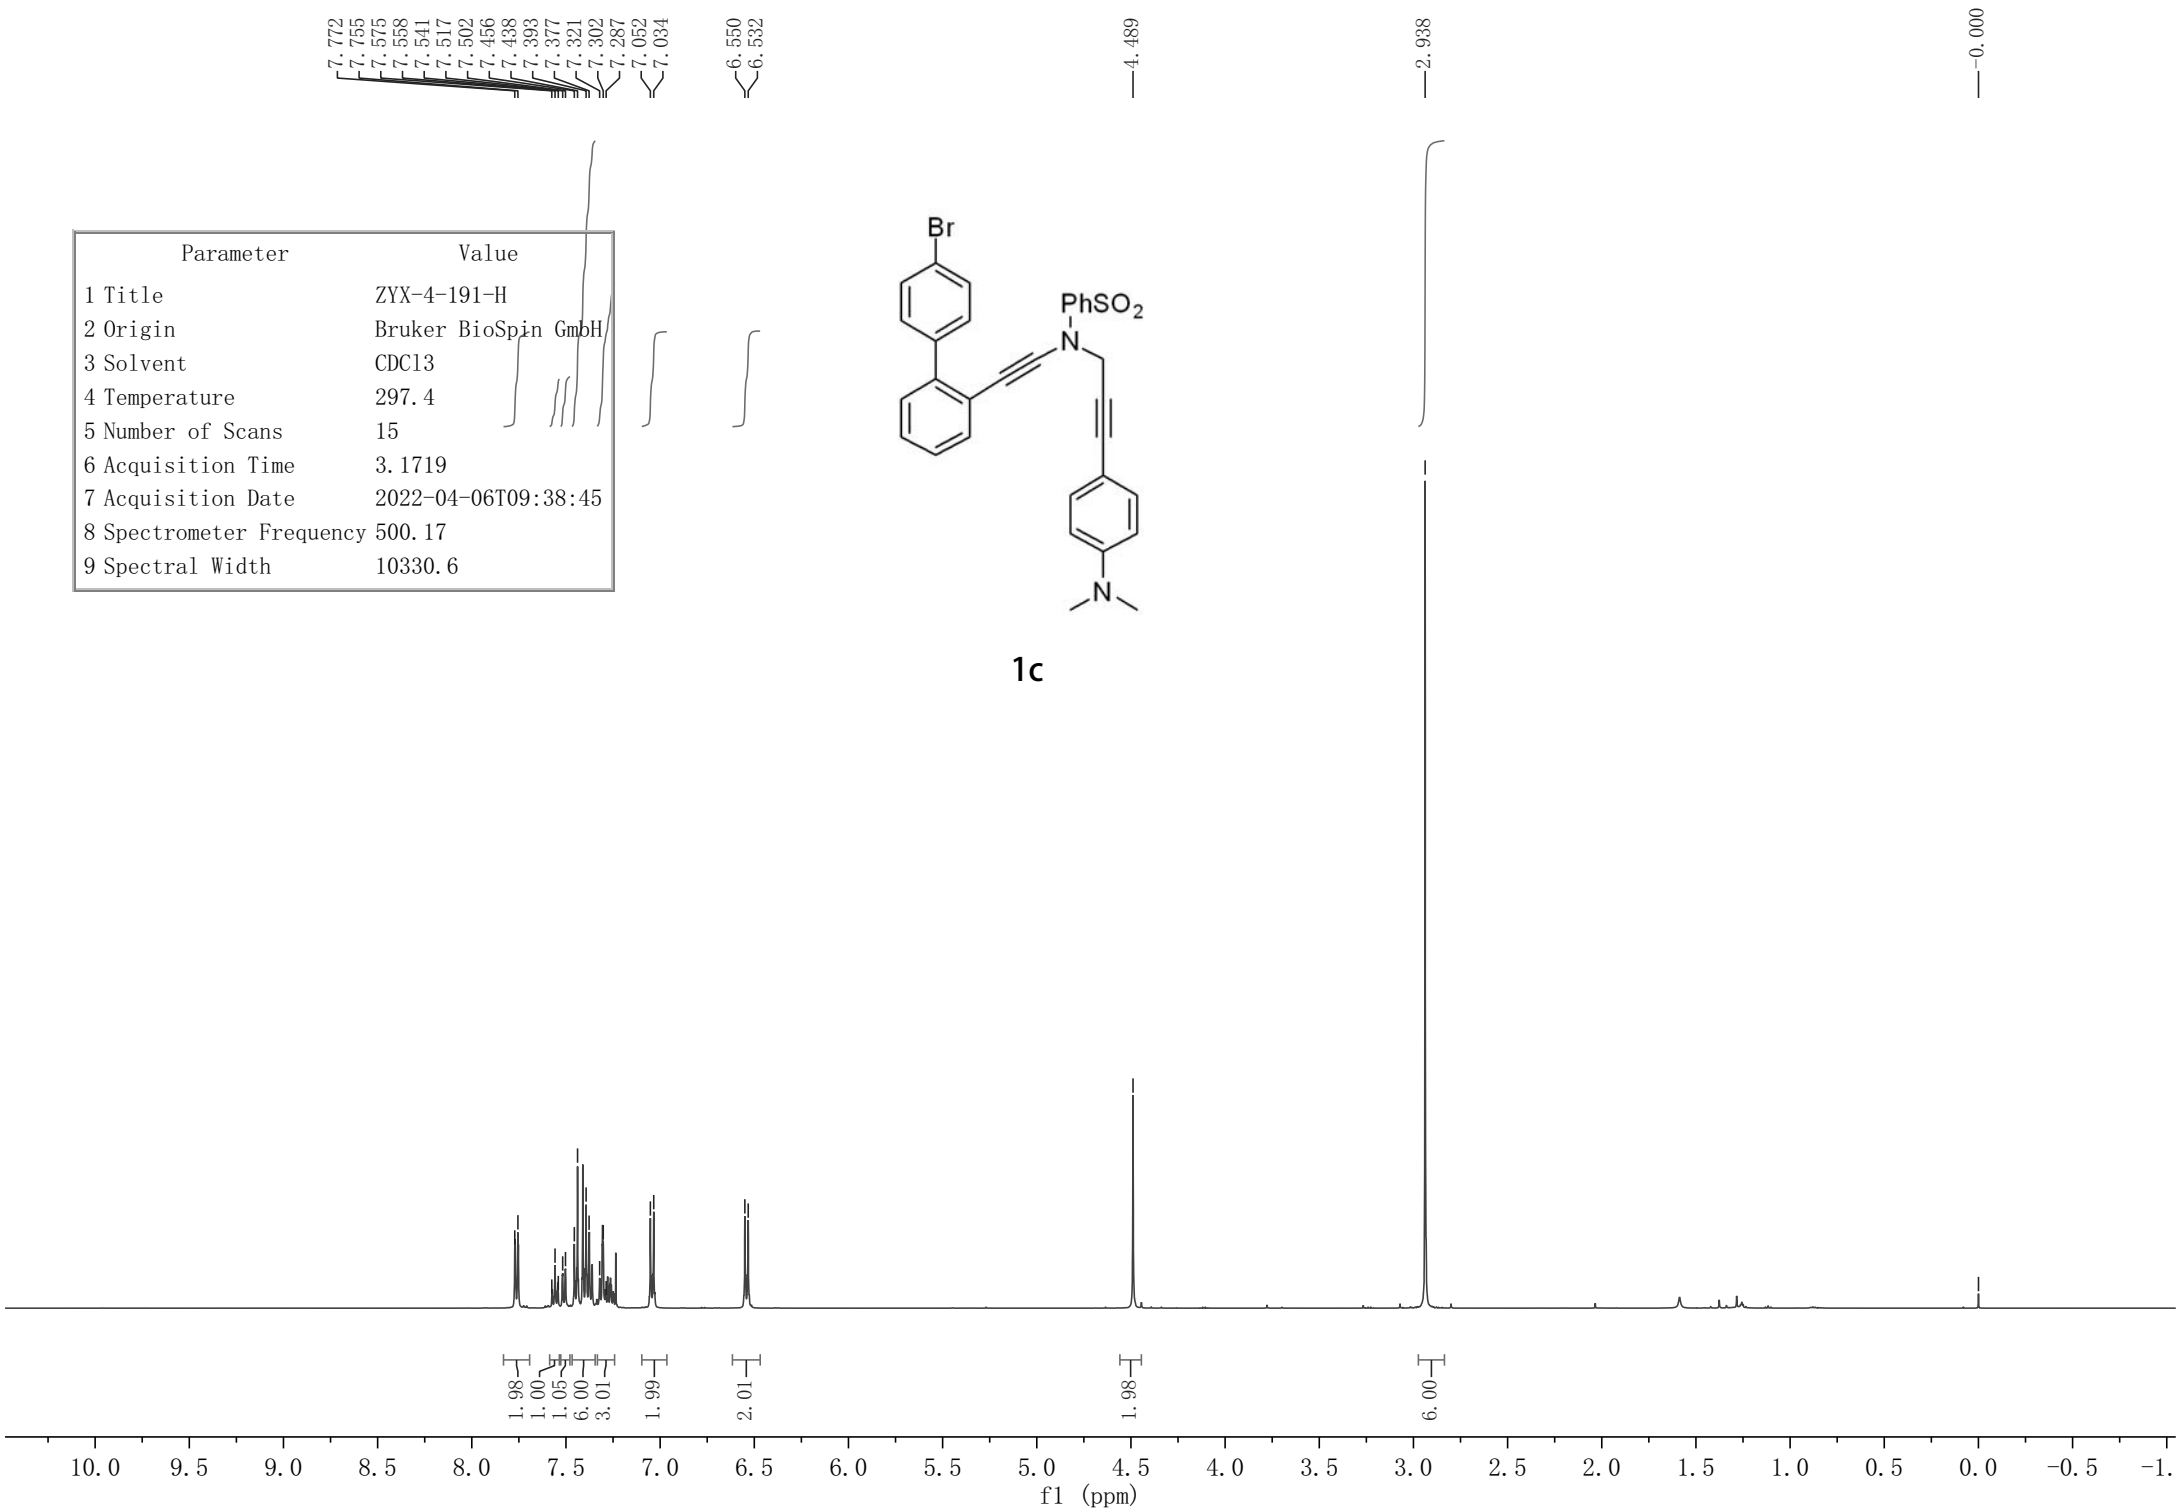

| Parameter                | Value               |
|--------------------------|---------------------|
| 1 Title                  | ZYX-4-191-C         |
| 2 Origin                 | Bruker BioSpin GmbH |
| 3 Solvent                | CDCl3               |
| 4 Temperature            | 297.6               |
| 5 Number of Scans        | 66                  |
| 6 Acquisition Time       | 1.1010              |
| 7 Acquisition Date       | 2022-04-06T09:40:29 |
| 8 Spectrometer Frequency | 125.77              |
| 9 Spectral Width         | 29761.9             |

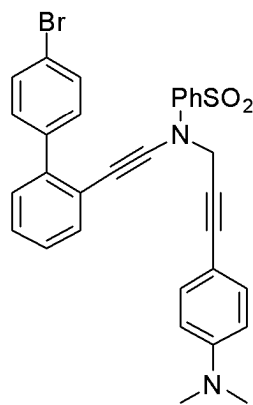

1c

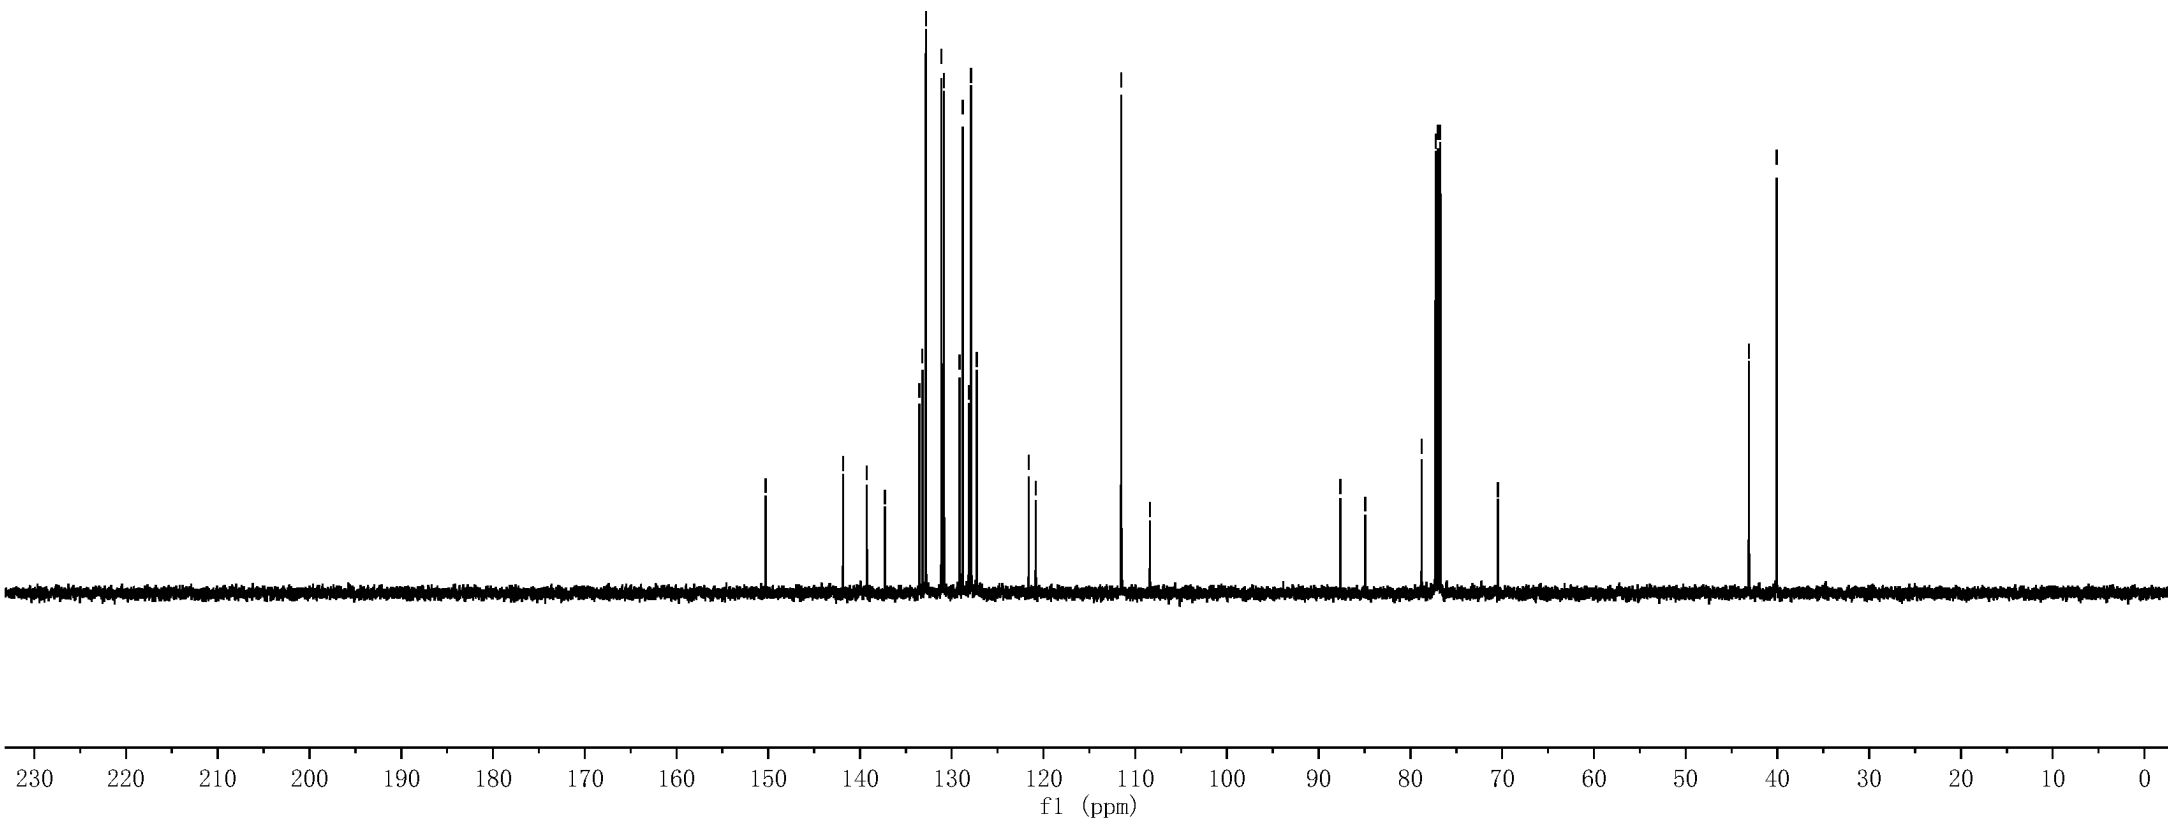

150.29  
133.53  
133.20  
132.81  
131.12  
130.85  
129.15  
128.82  
128.13  
127.89  
121.67  
120.84  
111.53  
108.40

87.63  
84.92  
78.78  
77.25  
77.00  
76.75  
70.46

43.11  
40.07

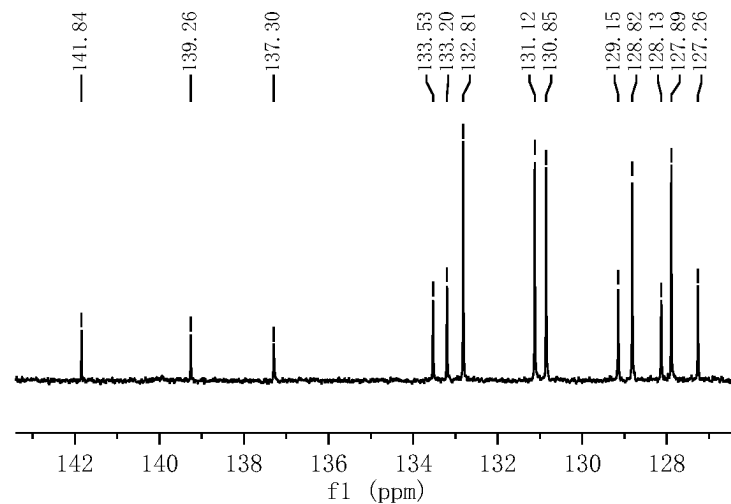

141.84

139.26

137.30

133.53

133.20

132.81

131.12

130.85

129.15

128.82

128.13

127.89

127.26

| Parameter                | Value               |
|--------------------------|---------------------|
| 1 Title                  | zyx-4-177-h         |
| 2 Origin                 | Bruker BioSpin GmbH |
| 3 Solvent                | CDCl3               |
| 4 Temperature            | 298.0               |
| 5 Number of Scans        | 16                  |
| 6 Acquisition Time       | 4.0894              |
| 7 Acquisition Date       | 2022-04-02T09:28:09 |
| 8 Spectrometer Frequency | 400.13              |
| 9 Spectral Width         | 8012.8              |

7.703  
7.680  
7.518  
7.488  
7.460  
7.303  
7.282  
7.255  
7.052  
7.030  
6.835  
6.813  
6.552  
6.529

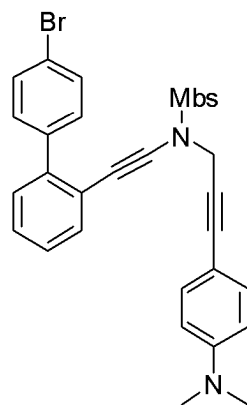

1d

4.442  
3.777  
2.939  
0.000

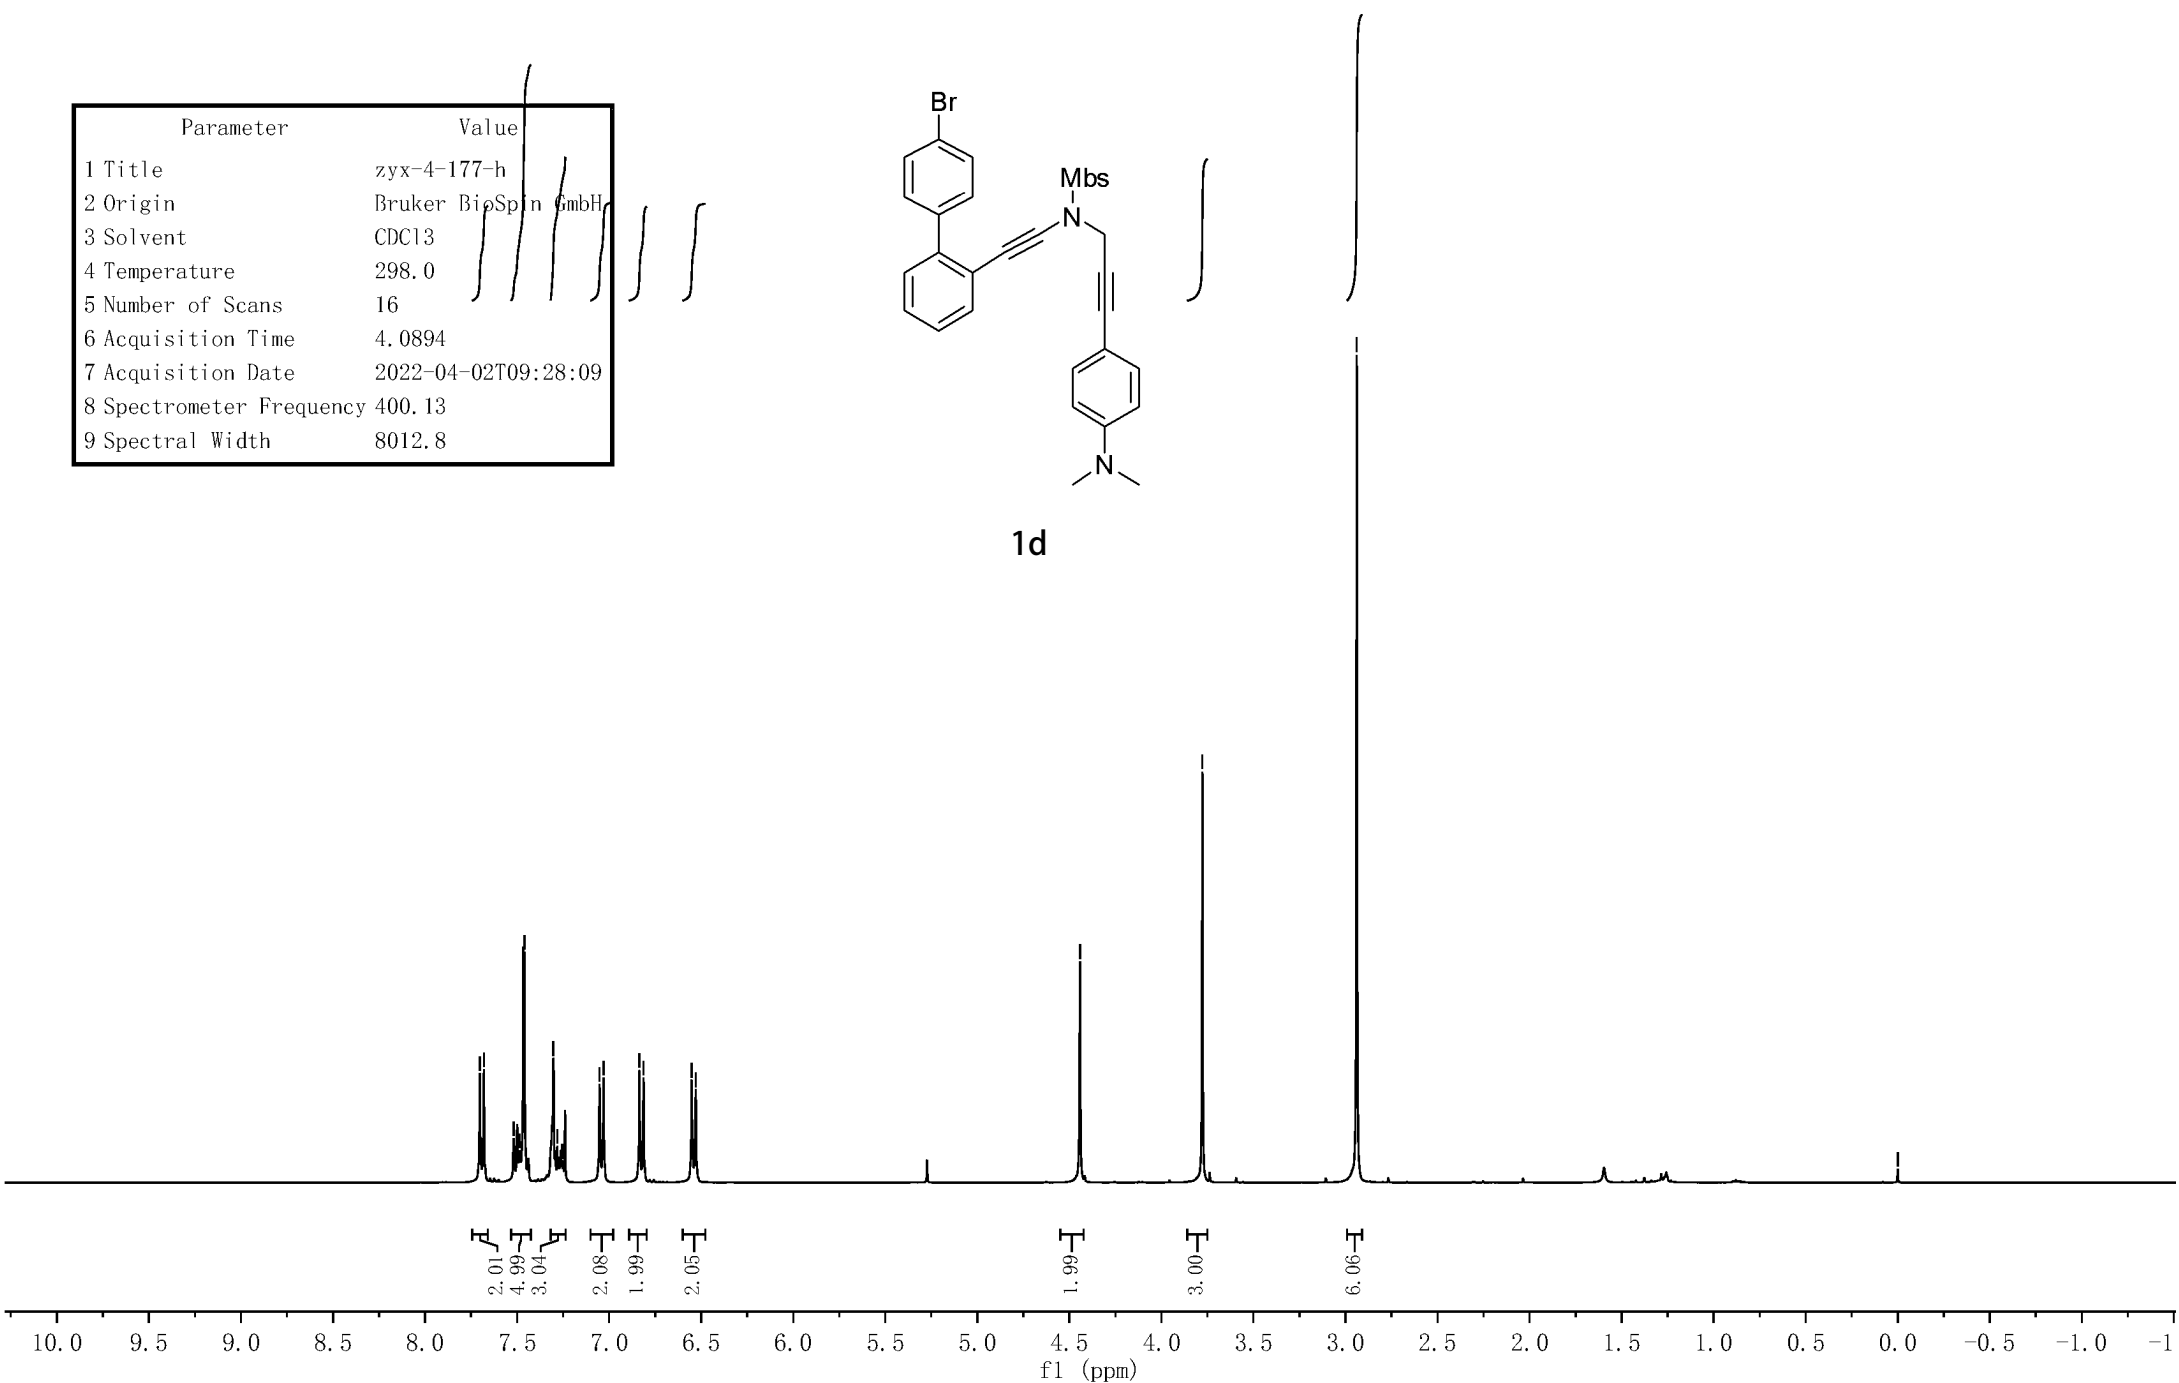



| Parameter                | Value               |
|--------------------------|---------------------|
| 1 Title                  | zyx-4-177-c         |
| 2 Origin                 | Bruker BioSpin GmbH |
| 3 Solvent                | CDCl3               |
| 4 Temperature            | 300.0               |
| 5 Number of Scans        | 121                 |
| 6 Acquisition Time       | 1.3631              |
| 7 Acquisition Date       | 2022-04-02T09:30:07 |
| 8 Spectrometer Frequency | 100.61              |
| 9 Spectral Width         | 24038.5             |

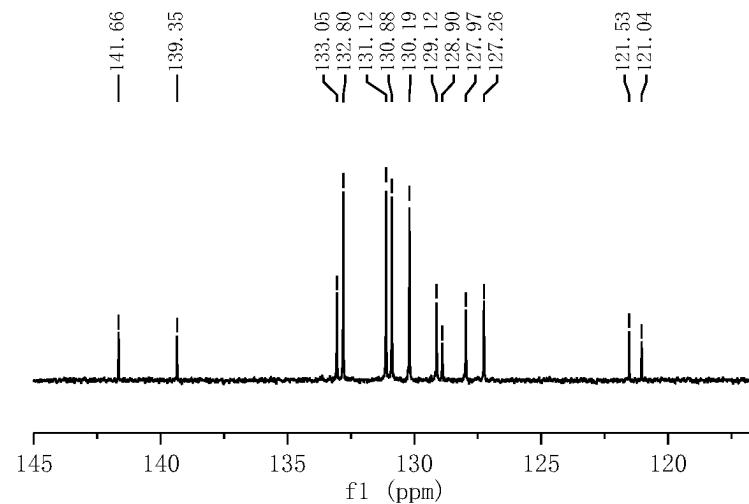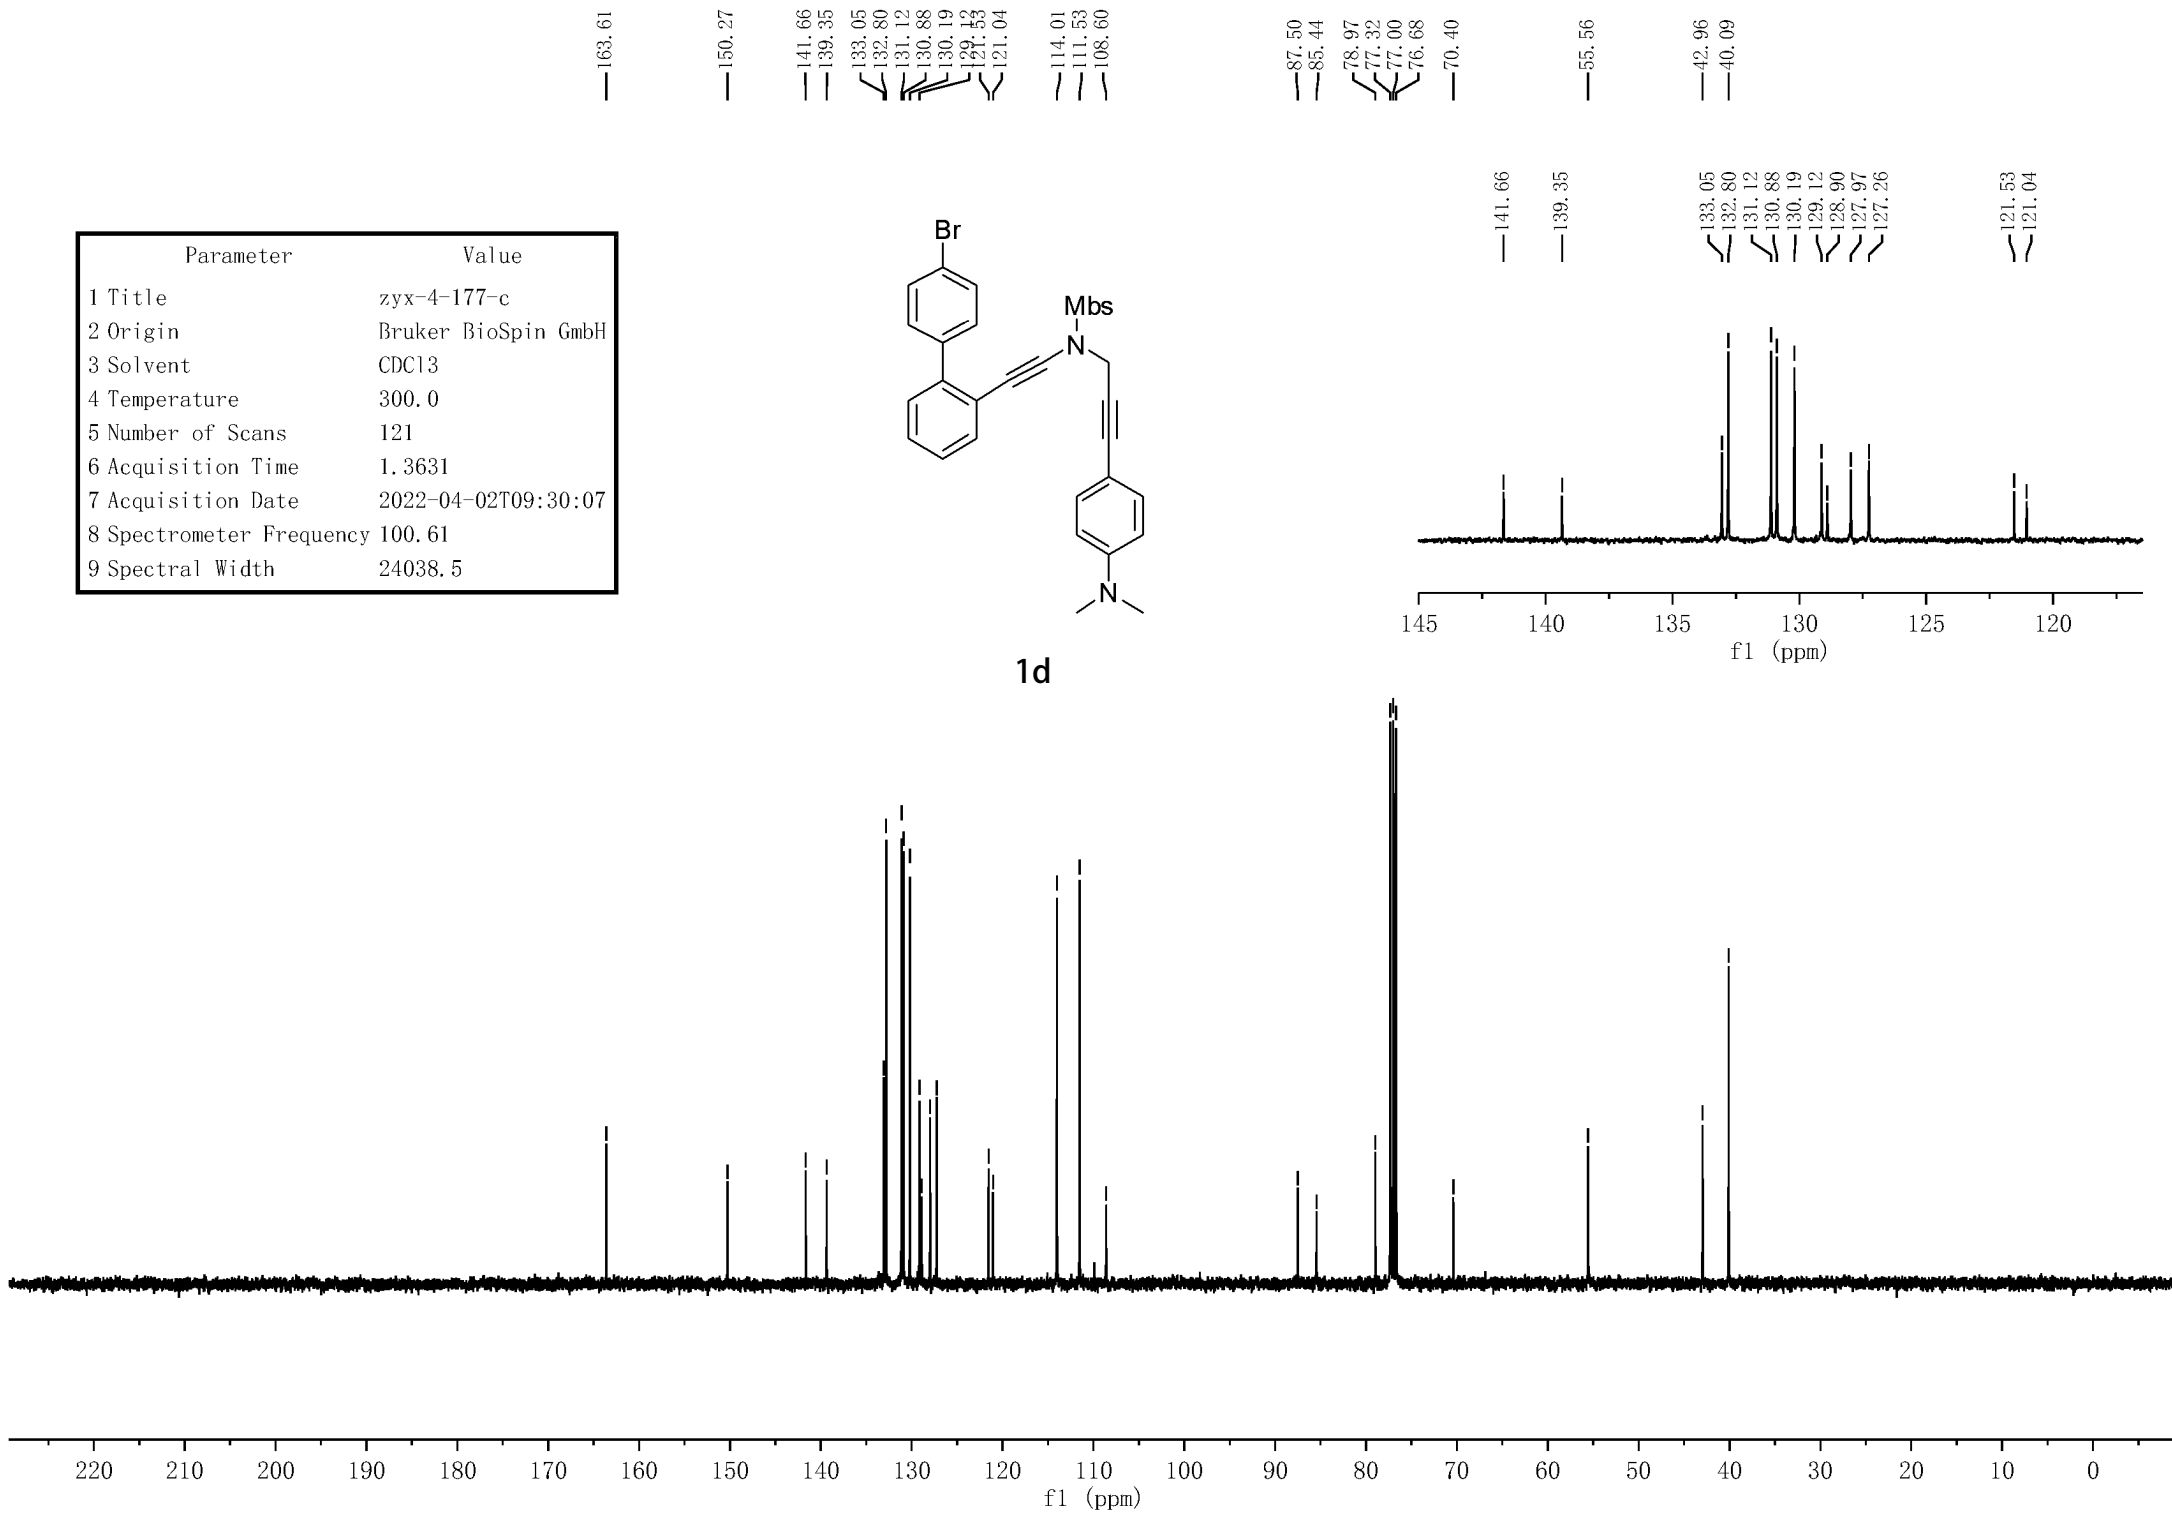

| Parameter                | Value               |
|--------------------------|---------------------|
| 1 Title                  | ZYX-4-204-H         |
| 2 Origin                 | Bruker BioSpin GmbH |
| 3 Solvent                | CDCl3               |
| 4 Temperature            | 295.5               |
| 5 Number of Scans        | 7                   |
| 6 Acquisition Time       | 3.9846              |
| 7 Acquisition Date       | 2022-04-11T21:52:35 |
| 8 Spectrometer Frequency | 399.93              |
| 9 Spectral Width         | 8223.7              |

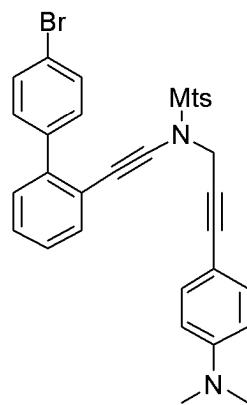

1e

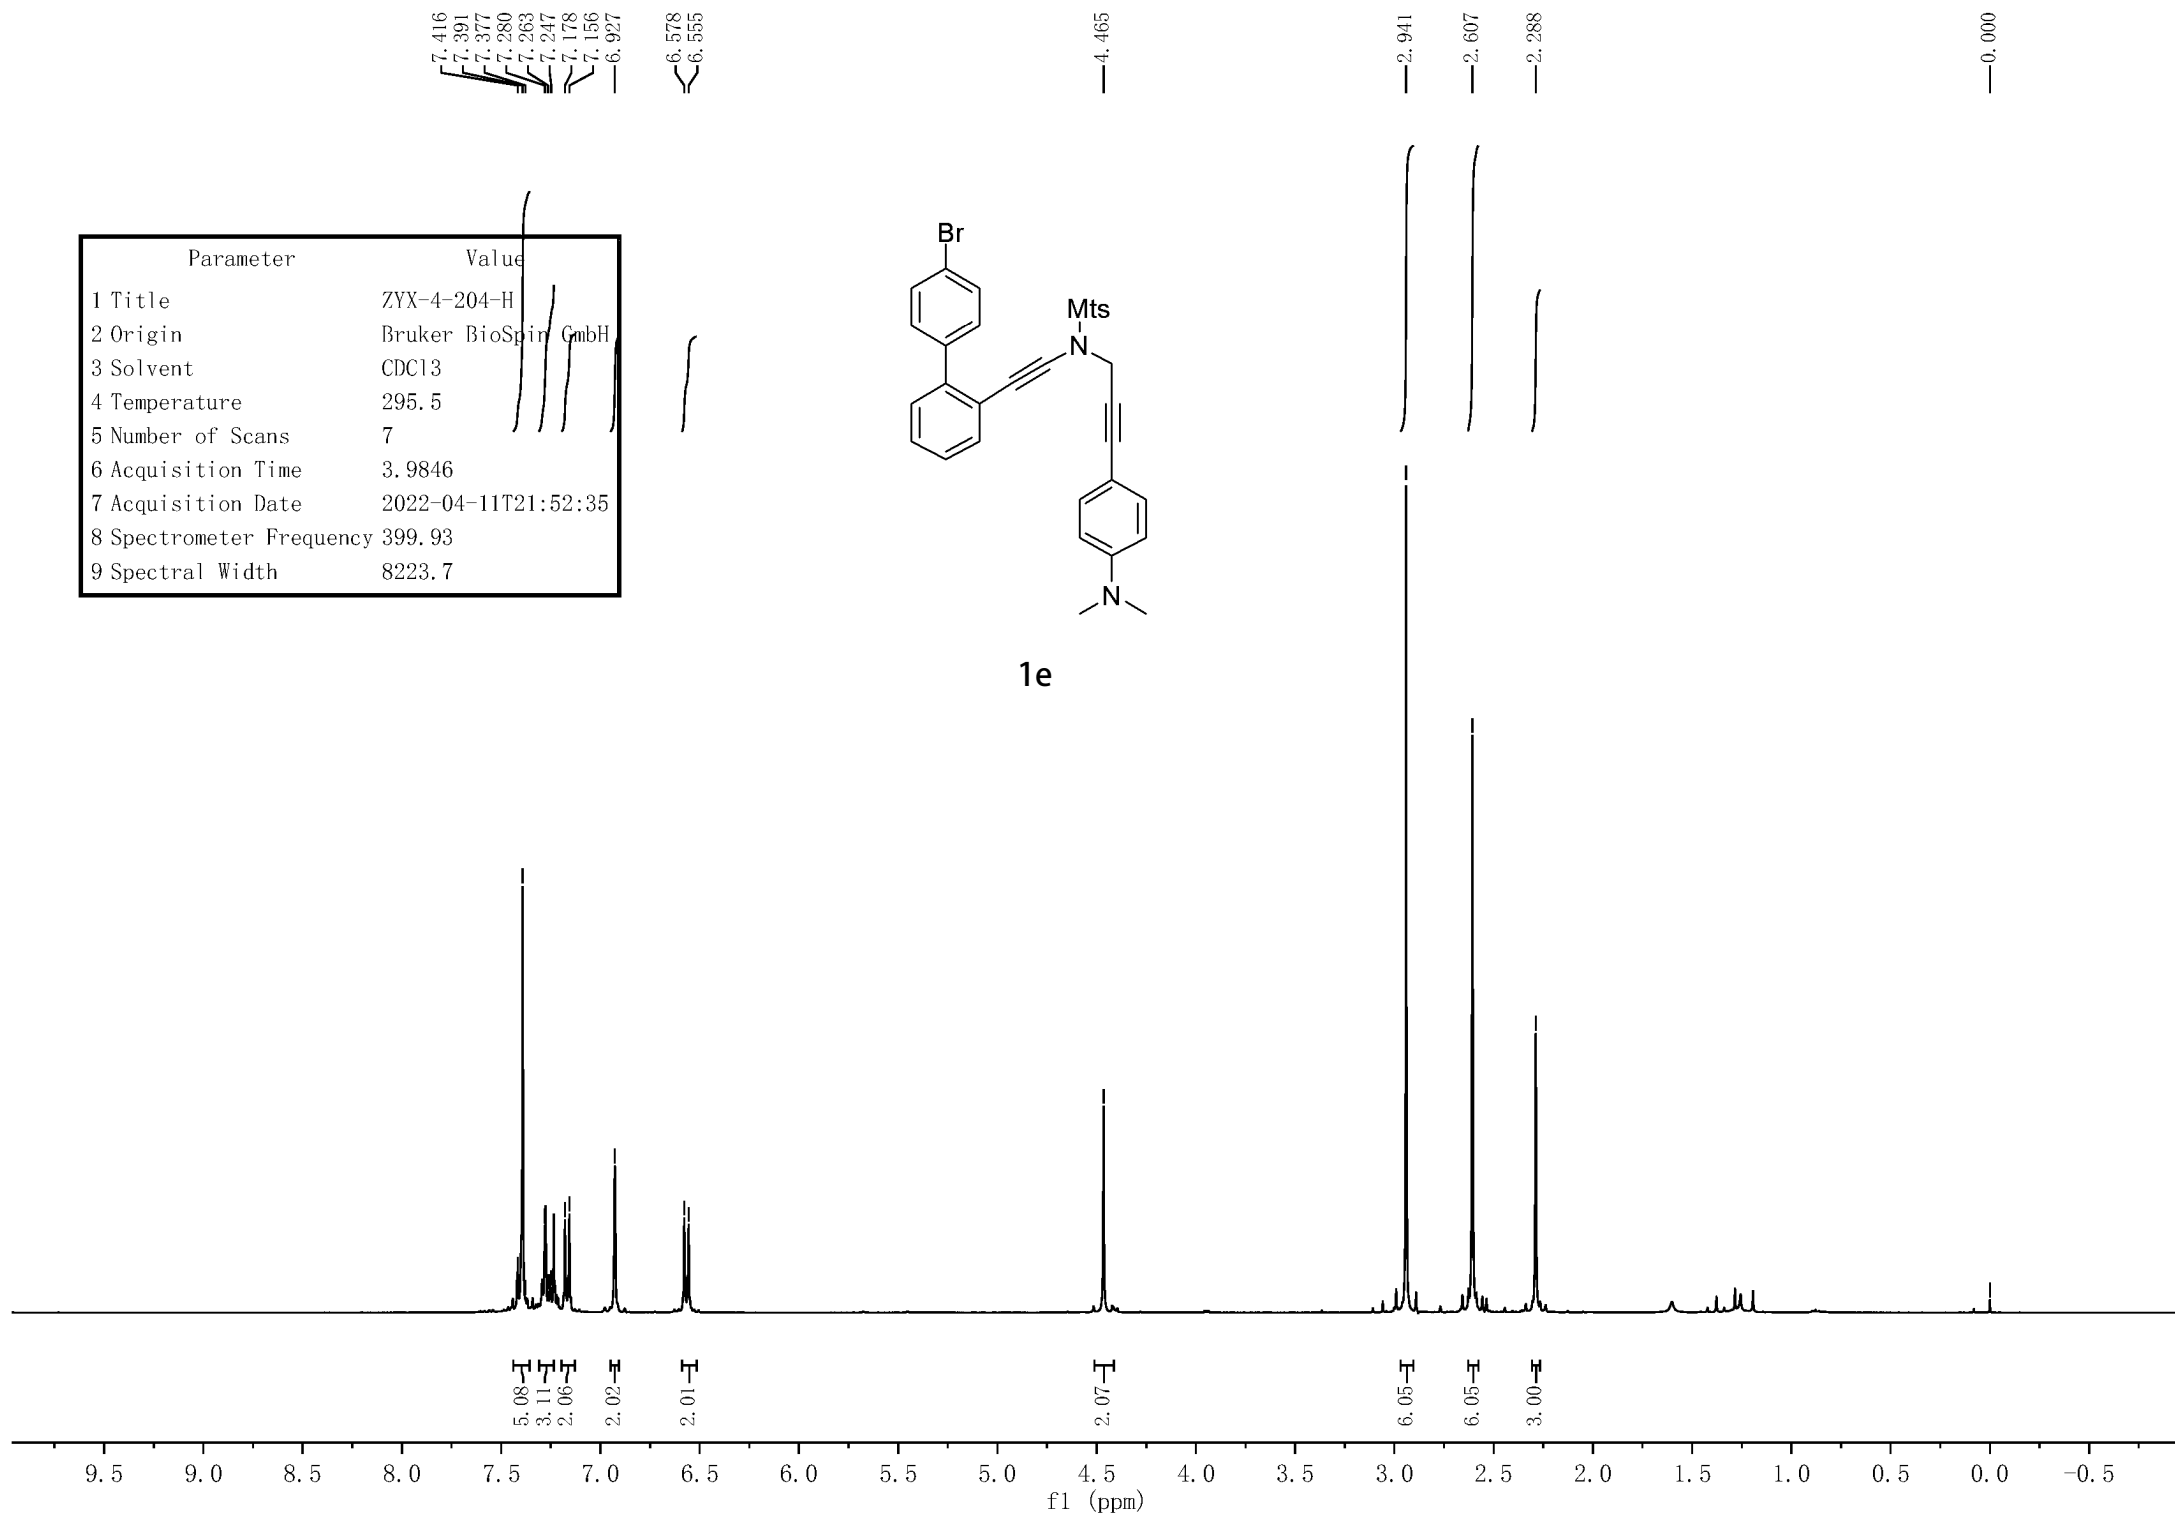

| Parameter                | Value               |
|--------------------------|---------------------|
| 1 Title                  | ZYX-4-204-C         |
| 2 Origin                 | Bruker BioSpin GmbH |
| 3 Solvent                | CDCl3               |
| 4 Temperature            | 295.7               |
| 5 Number of Scans        | 56                  |
| 6 Acquisition Time       | 1.3631              |
| 7 Acquisition Date       | 2022-04-11T21:55:16 |
| 8 Spectrometer Frequency | 100.56              |
| 9 Spectral Width         | 24038.5             |



1e

150.26  
 143.55  
 141.78  
 140.86  
 139.20  
 132.88  
 132.00  
 130.93  
 130.76  
 127.49  
 121.08  
 111.59  
 108.68

86.98  
 85.16  
 79.38  
 77.32  
 77.00  
 76.68  
 71.49

41.45  
 40.10  
 23.09  
 21.03

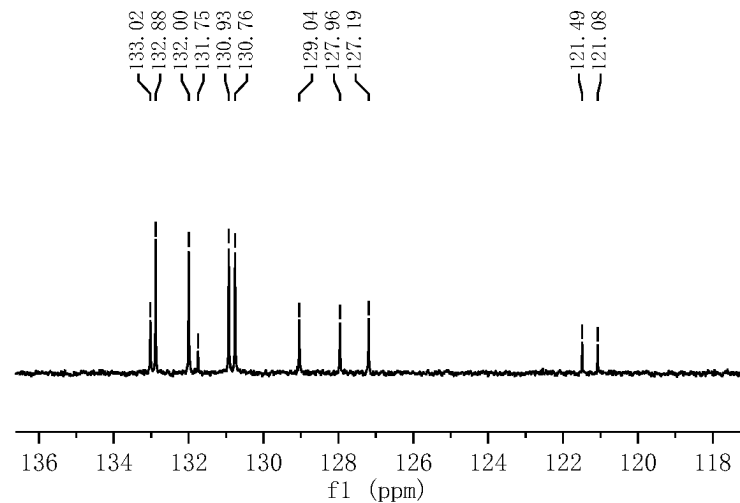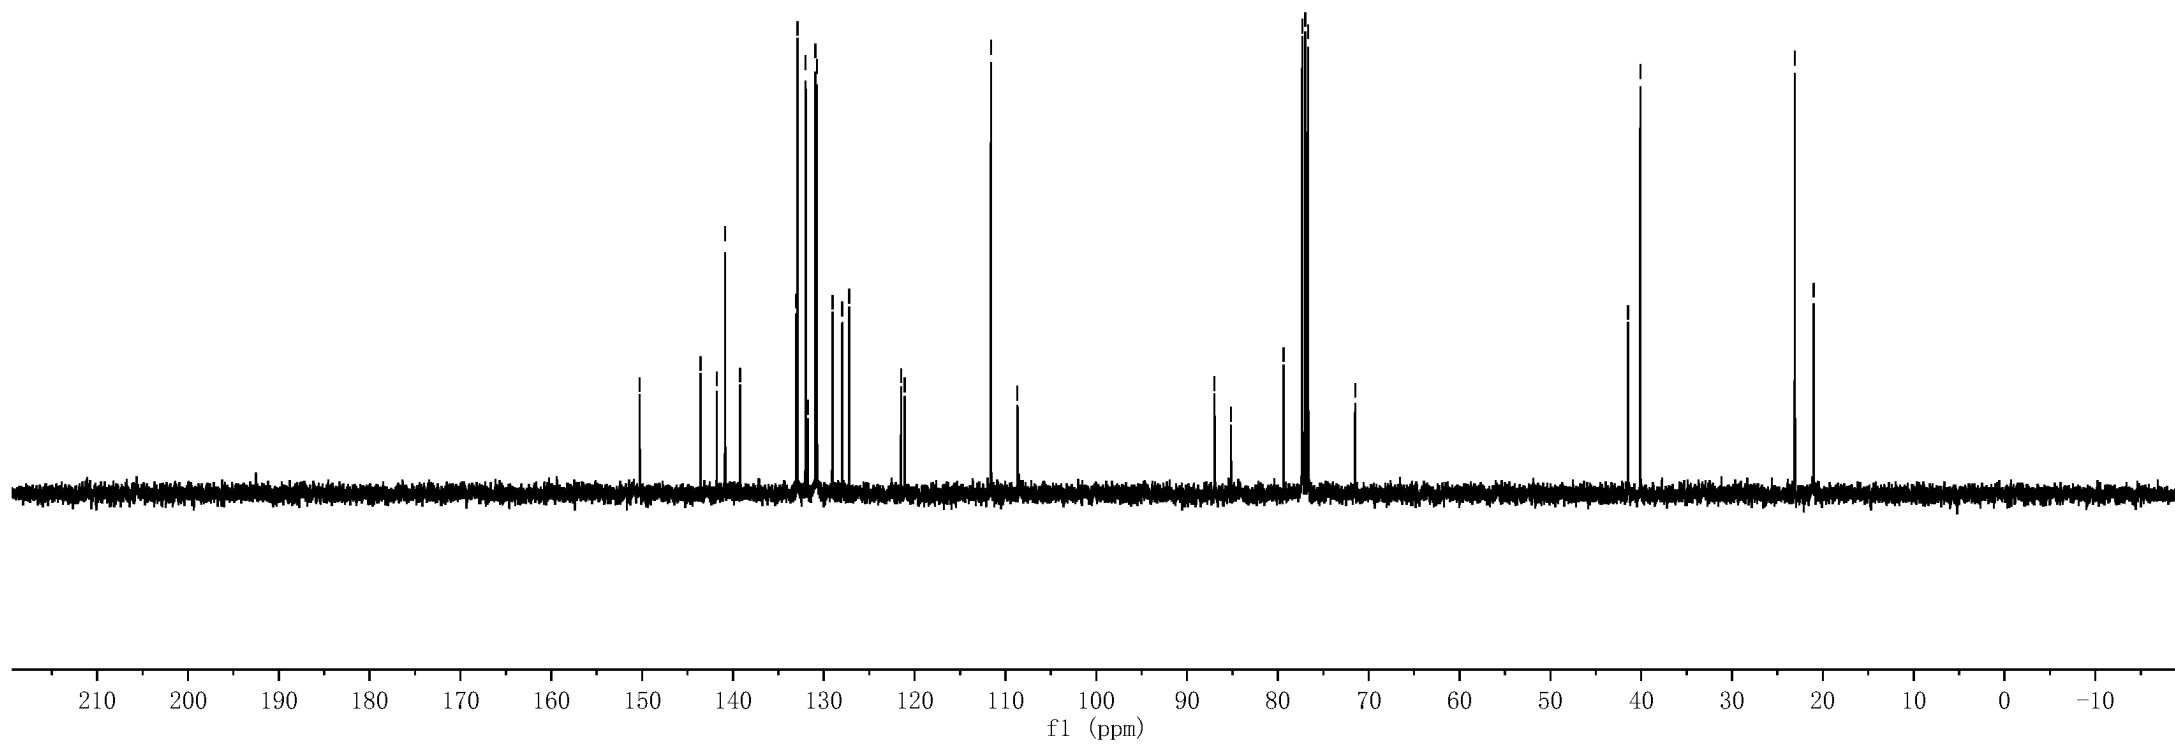

| Parameter                | Value               |
|--------------------------|---------------------|
| 1 Title                  | zyx-4-178-h         |
| 2 Origin                 | Bruker BioSpin GmbH |
| 3 Solvent                | CDCl3               |
| 4 Temperature            | 298.0               |
| 5 Number of Scans        | 17                  |
| 6 Acquisition Time       | 4.0894              |
| 7 Acquisition Date       | 2022-04-02T09:40:55 |
| 8 Spectrometer Frequency | 400.13              |
| 9 Spectral Width         | 8012.8              |

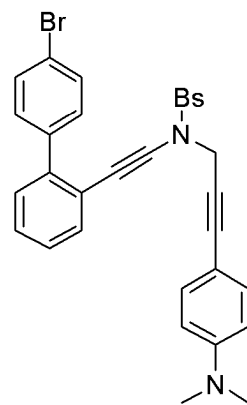

1f

7.590  
7.568  
7.516  
7.505  
7.484  
7.455  
7.336  
7.317  
7.276  
7.004  
6.982

6.578  
6.556

4.477

2.953

0.000

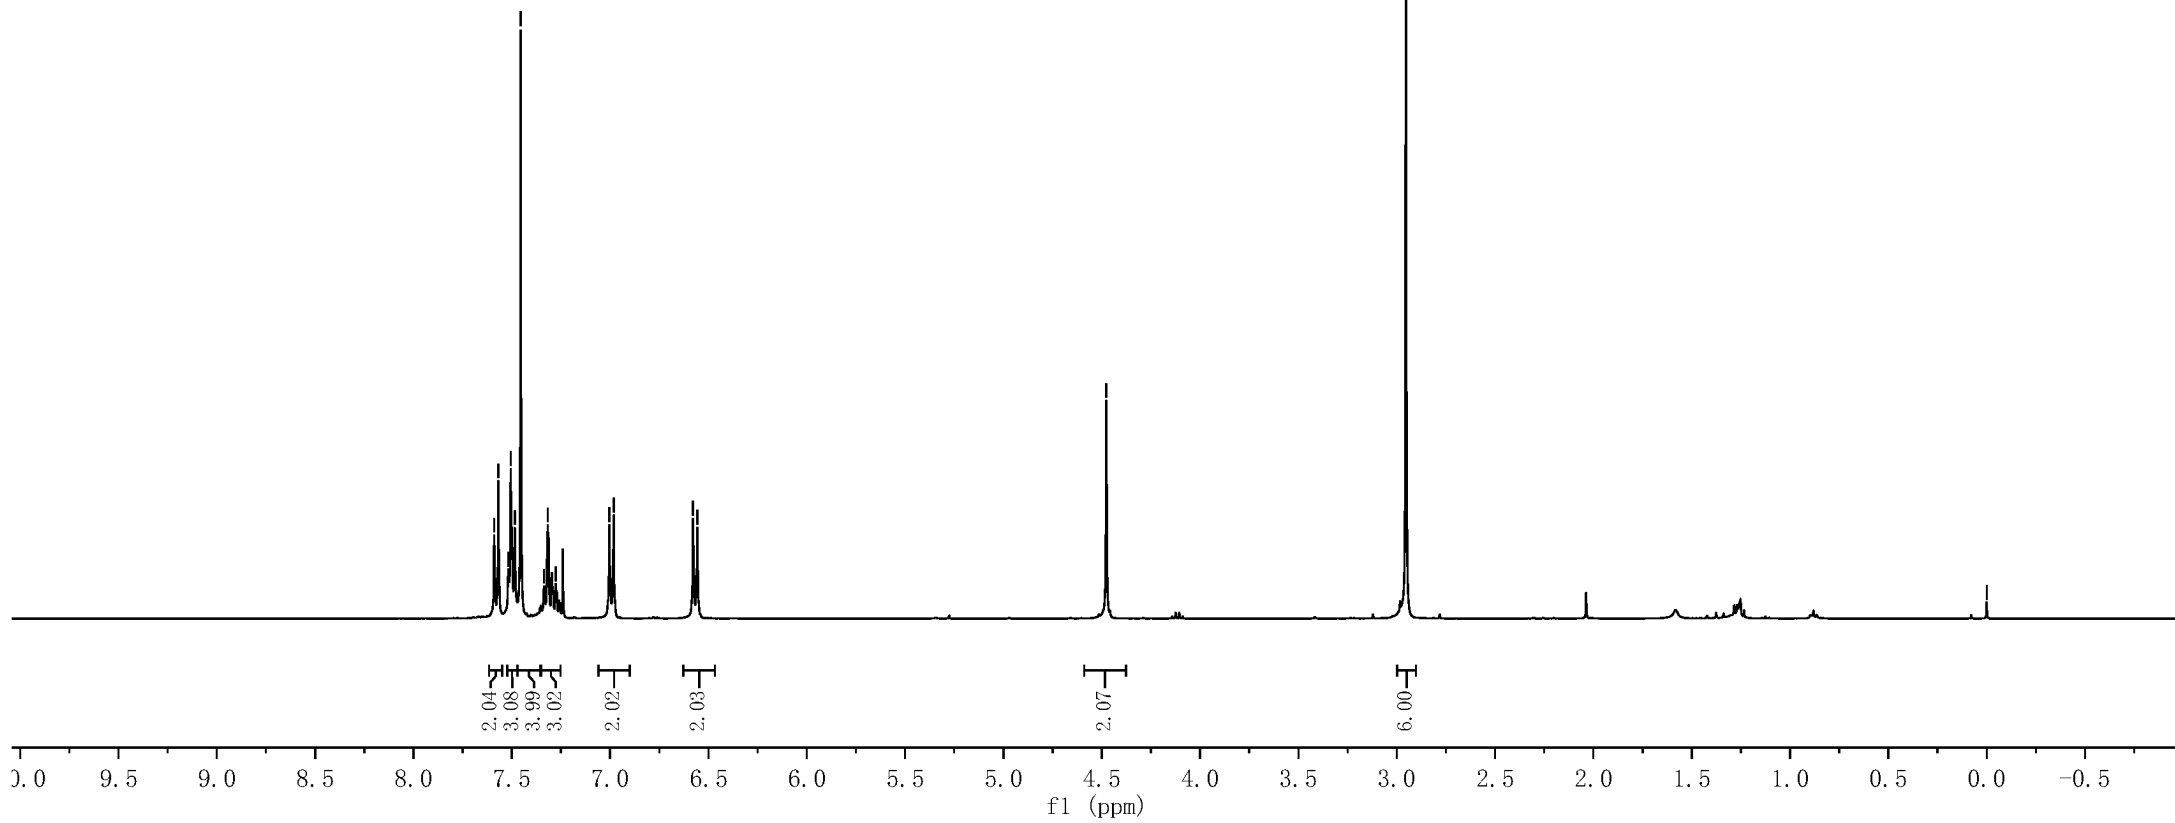

| Parameter                | Value               |
|--------------------------|---------------------|
| 1 Title                  | zyx-4-178-c         |
| 2 Origin                 | Bruker BioSpin GmbH |
| 3 Solvent                | CDCl3               |
| 4 Temperature            | 300.0               |
| 5 Number of Scans        | 161                 |
| 6 Acquisition Time       | 1.3631              |
| 7 Acquisition Date       | 2022-04-02T09:42:55 |
| 8 Spectrometer Frequency | 100.61              |
| 9 Spectral Width         | 24038.5             |

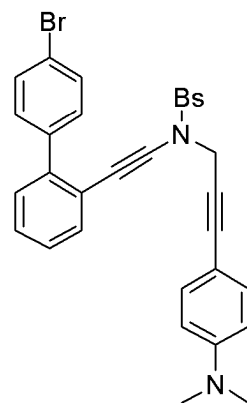

1f

150.37  
141.89  
133.04  
132.78  
132.13  
131.20  
130.88  
129.40  
129.19  
128.23  
127.88  
127.32  
120.70

111.68  
108.15

88.01  
84.66  
78.54  
77.32  
77.00  
76.68  
70.61

43.28  
40.10

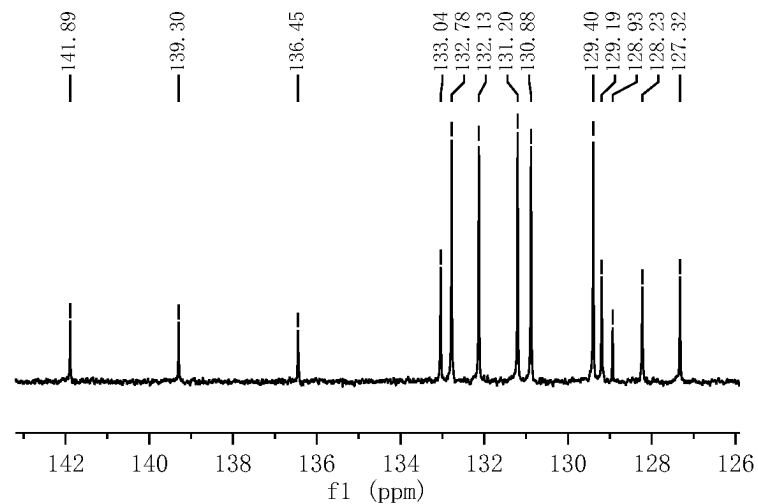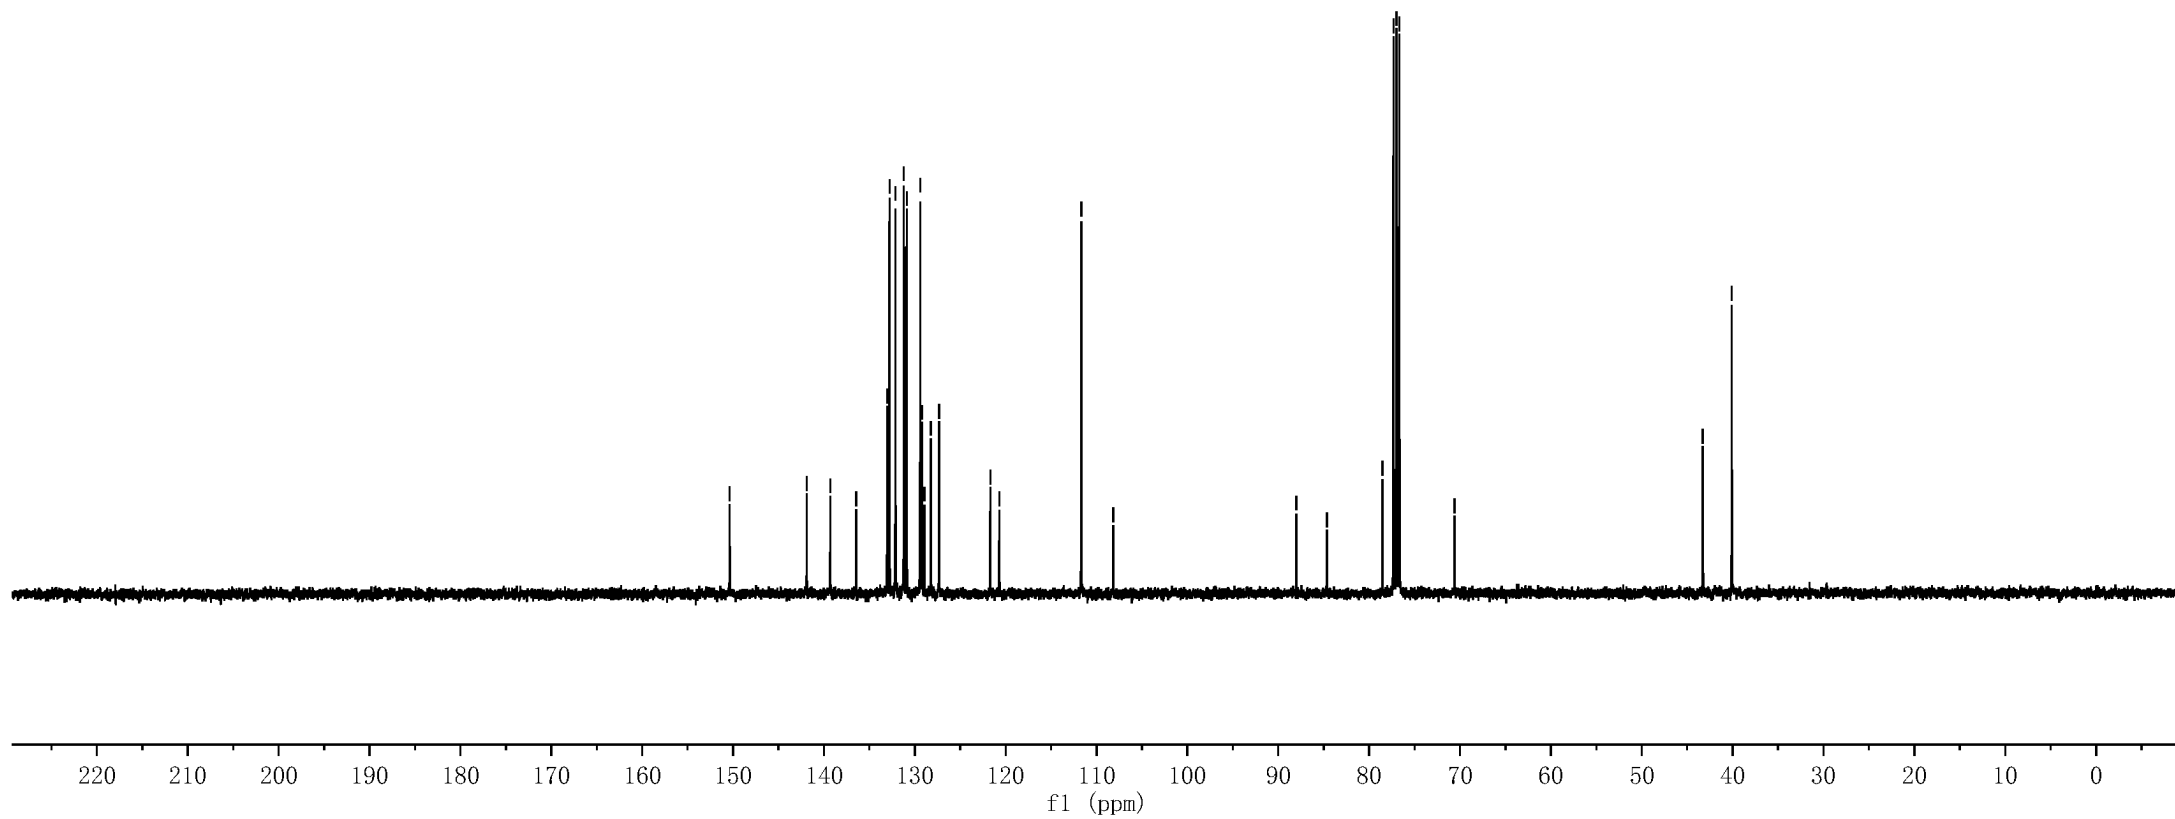

| Parameter                | Value               |
|--------------------------|---------------------|
| 1 Title                  | ZYX-4-207-H         |
| 2 Origin                 | Bruker BioSpin GmbH |
| 3 Solvent                | CDCl3               |
| 4 Temperature            | 295.8               |
| 5 Number of Scans        | 6                   |
| 6 Acquisition Time       | 3.9846              |
| 7 Acquisition Date       | 2022-04-11T22:01:21 |
| 8 Spectrometer Frequency | 399.93              |
| 9 Spectral Width         | 8223.7              |

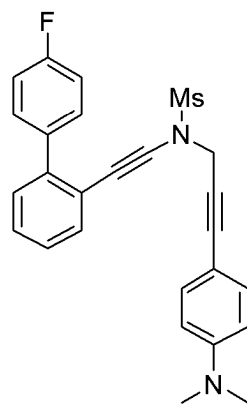

1g

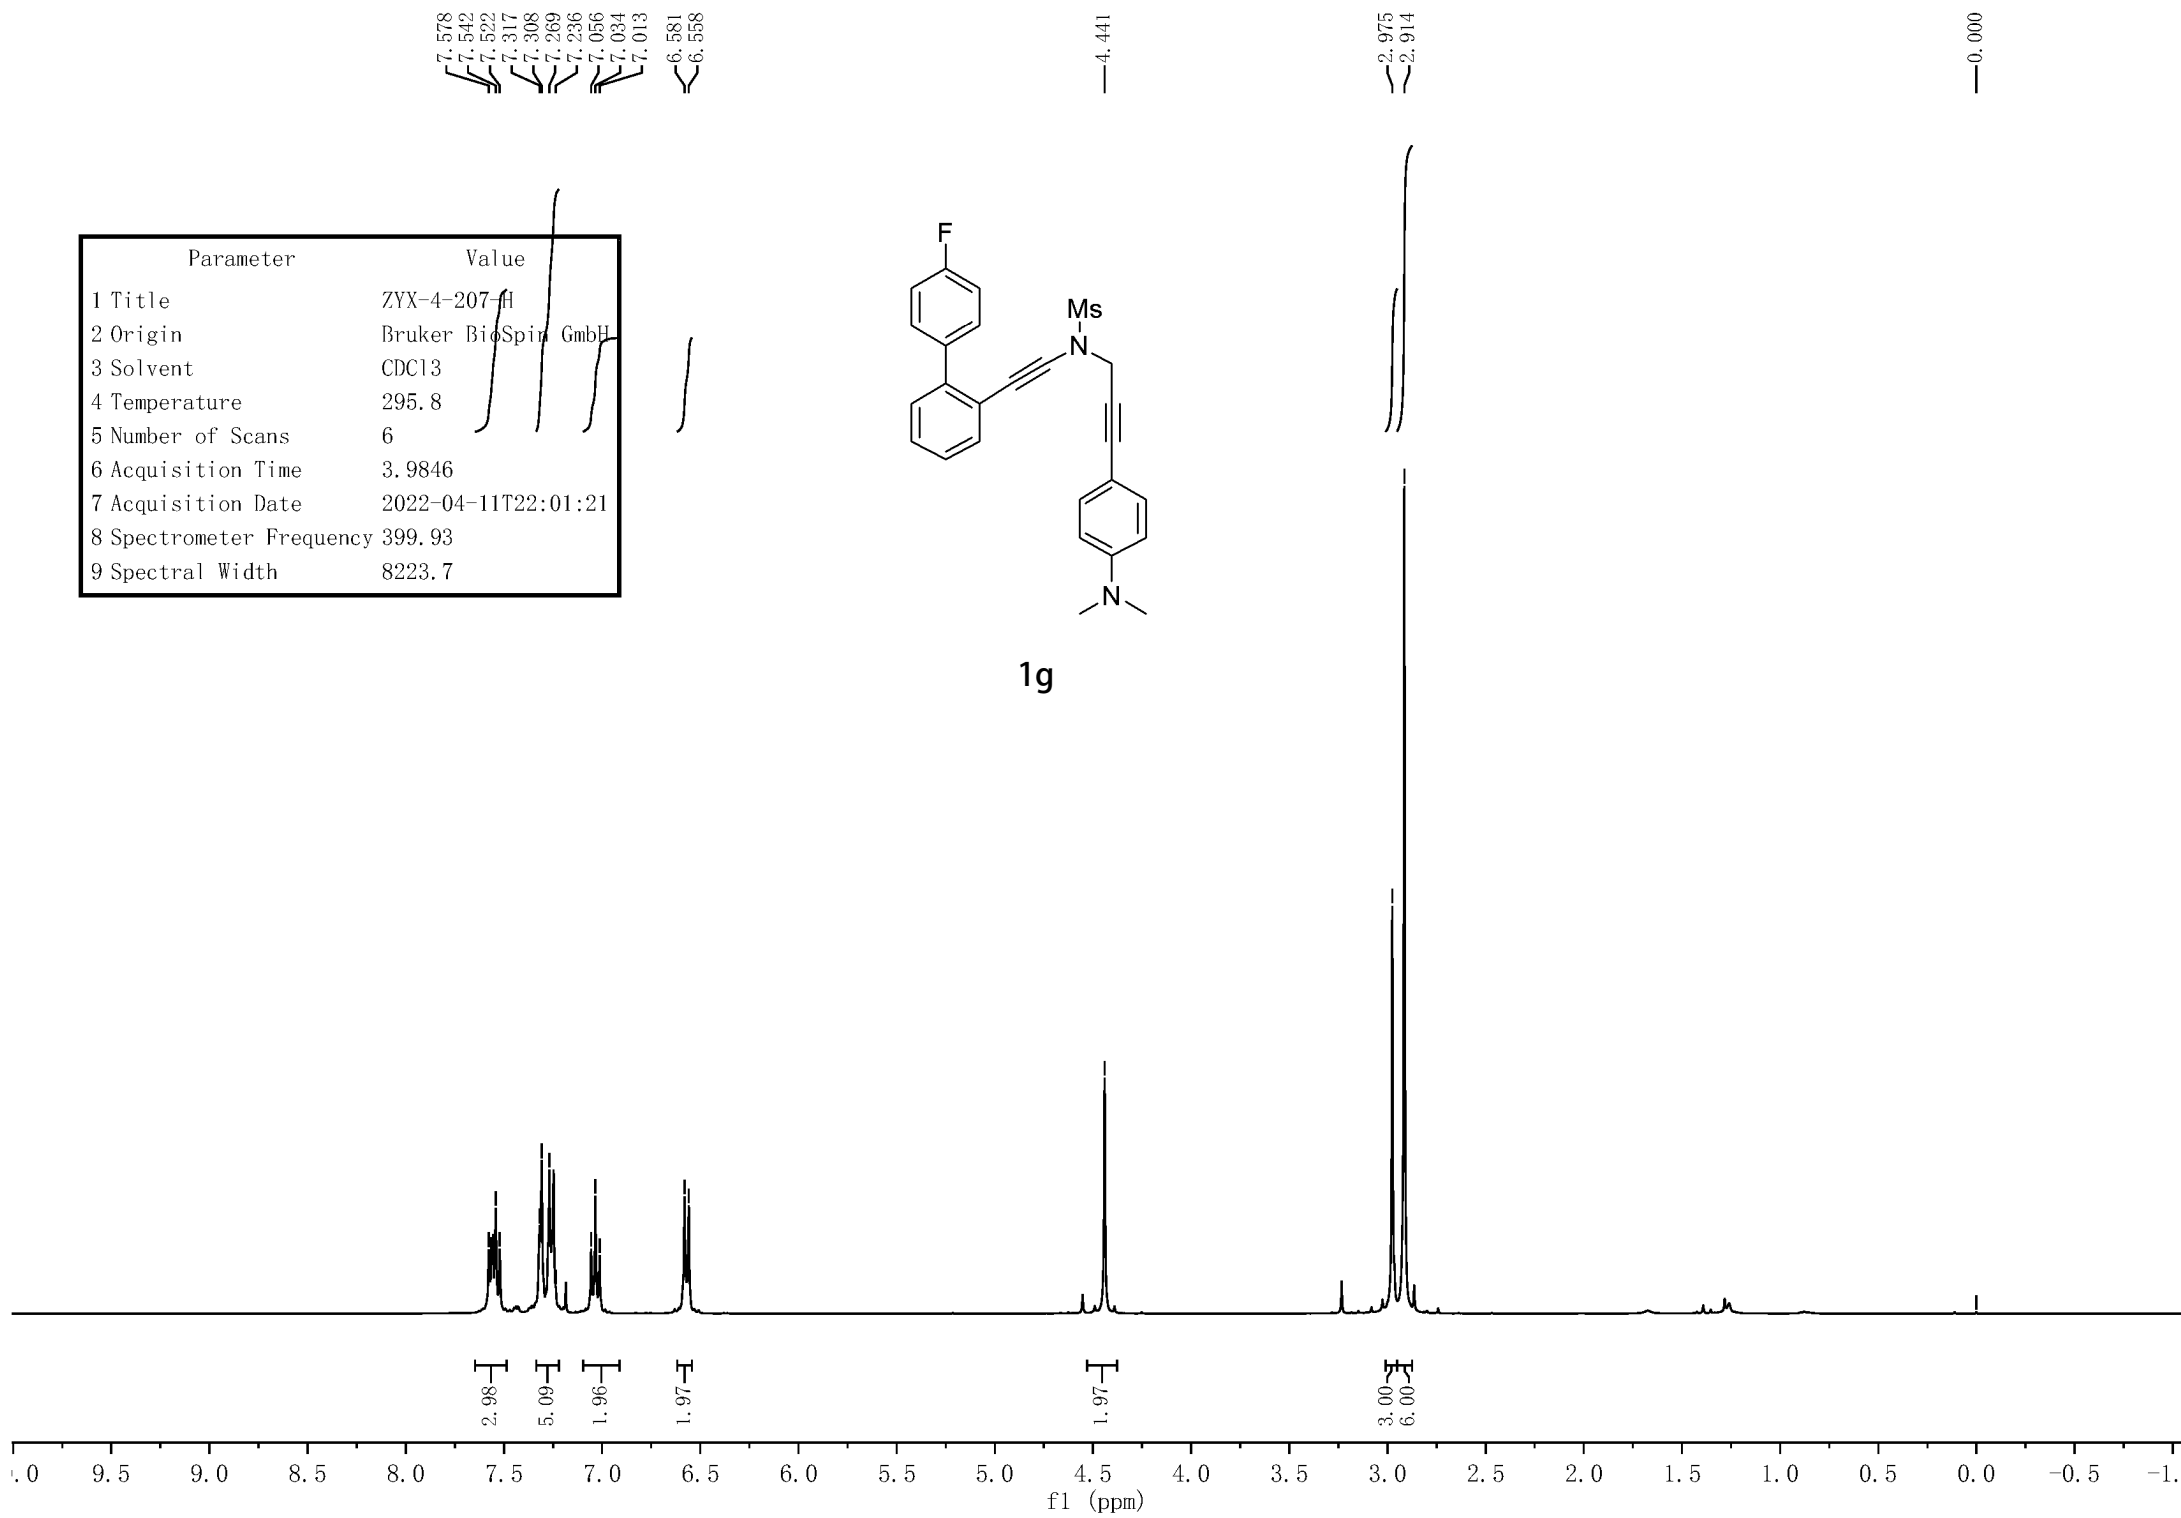

| Parameter                | Value               |
|--------------------------|---------------------|
| 1 Title                  | ZYX-4-207-C         |
| 2 Origin                 | Bruker BioSpin GmbH |
| 3 Solvent                | CDC13               |
| 4 Temperature            | 296.0               |
| 5 Number of Scans        | 33                  |
| 6 Acquisition Time       | 1.3631              |
| 7 Acquisition Date       | 2022-04-11T22:02:49 |
| 8 Spectrometer Frequency | 100.56              |
| 9 Spectral Width         | 24038.5             |

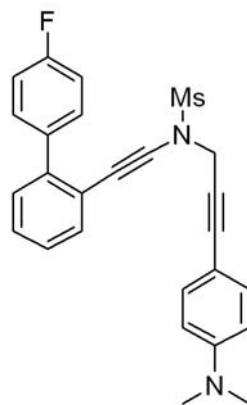

1g

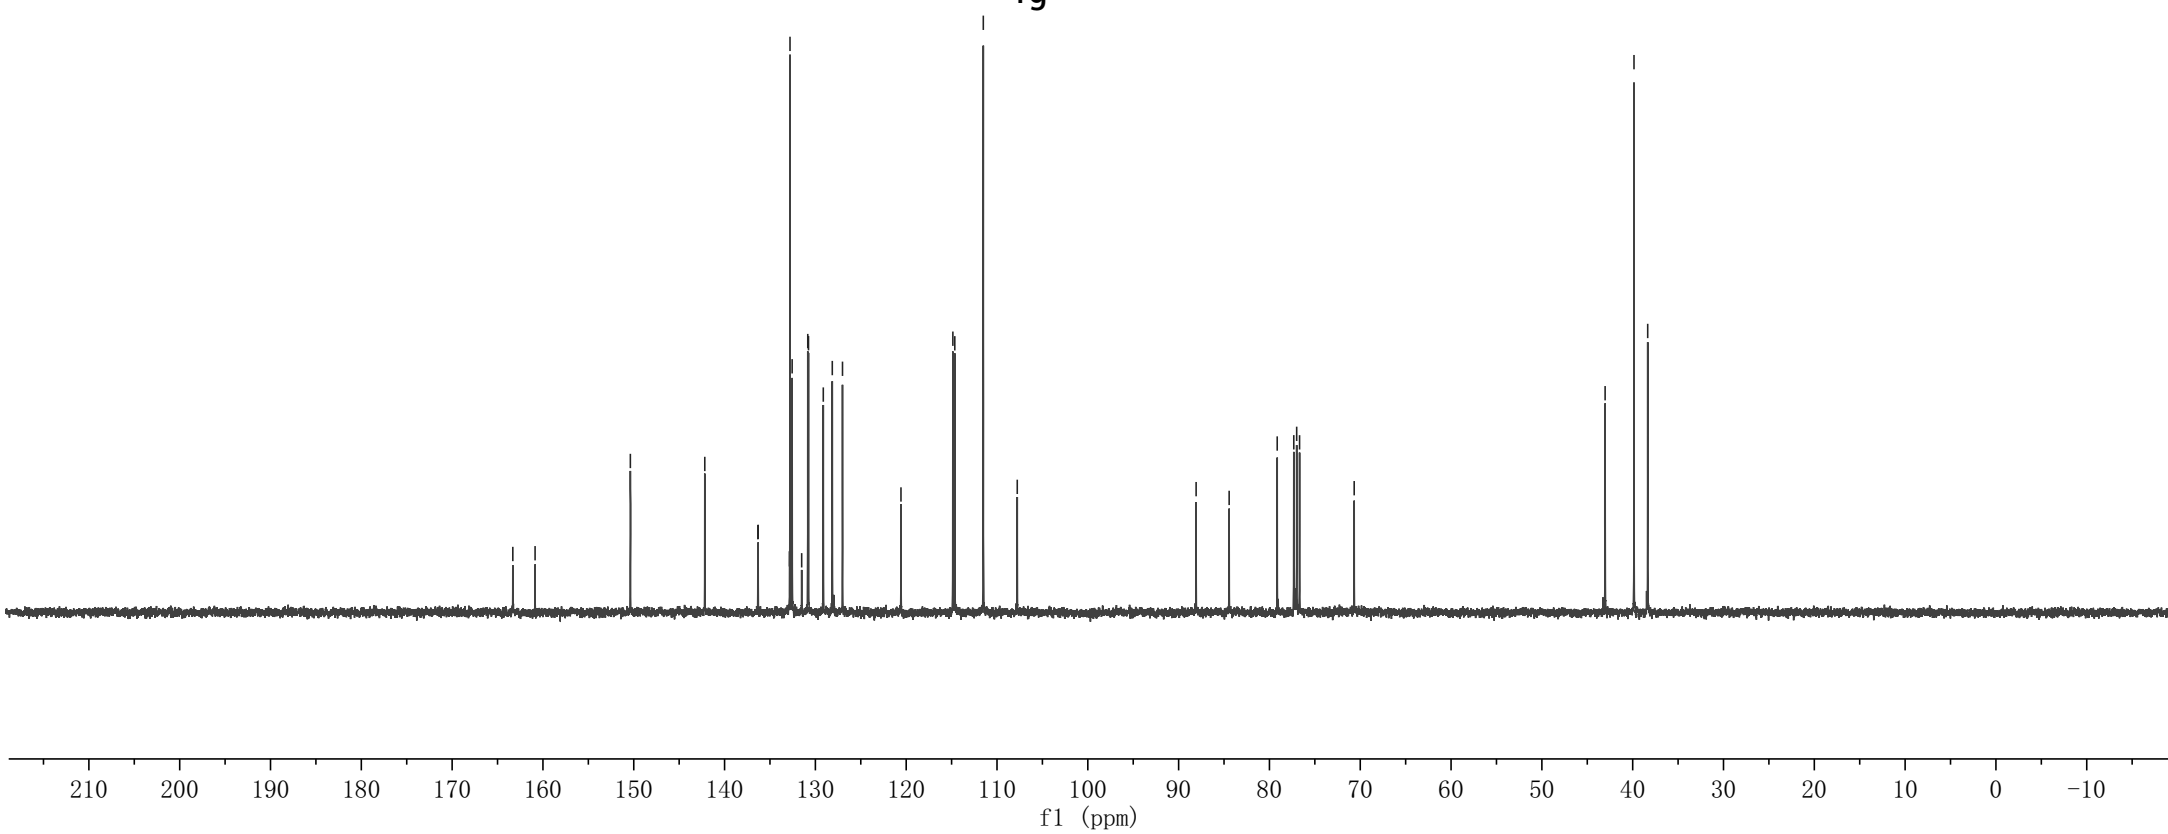

163.32  
160.87  
150.37  
142.18  
136.30  
132.79  
132.56  
130.84  
130.76  
129.13  
128.14  
127.94  
120.57  
114.86  
114.65  
111.51  
107.77

88.07  
84.44  
79.14  
77.32  
77.00  
76.68  
70.67

43.04  
39.85  
38.35

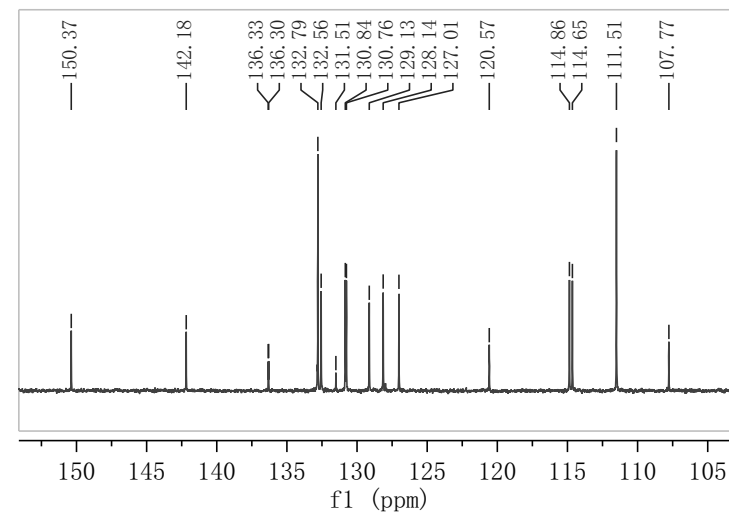

150.37  
142.18  
136.33  
136.30  
132.79  
132.56  
131.51  
130.84  
130.76  
129.13  
128.14  
127.01  
120.57  
114.86  
114.65  
111.51  
107.77

| Parameter                | Value               |
|--------------------------|---------------------|
| 1 Title                  | ZYX-4-207-FF        |
| 2 Origin                 | Bruker BioSpin GmbH |
| 3 Solvent                | CDCl3               |
| 4 Temperature            | 297.2               |
| 5 Number of Scans        | 16                  |
| 6 Acquisition Time       | 0.7340              |
| 7 Acquisition Date       | 2022-08-30T09:26:27 |
| 8 Spectrometer Frequency | 376.31              |
| 9 Spectral Width         | 89285.7             |



1g

—114.91

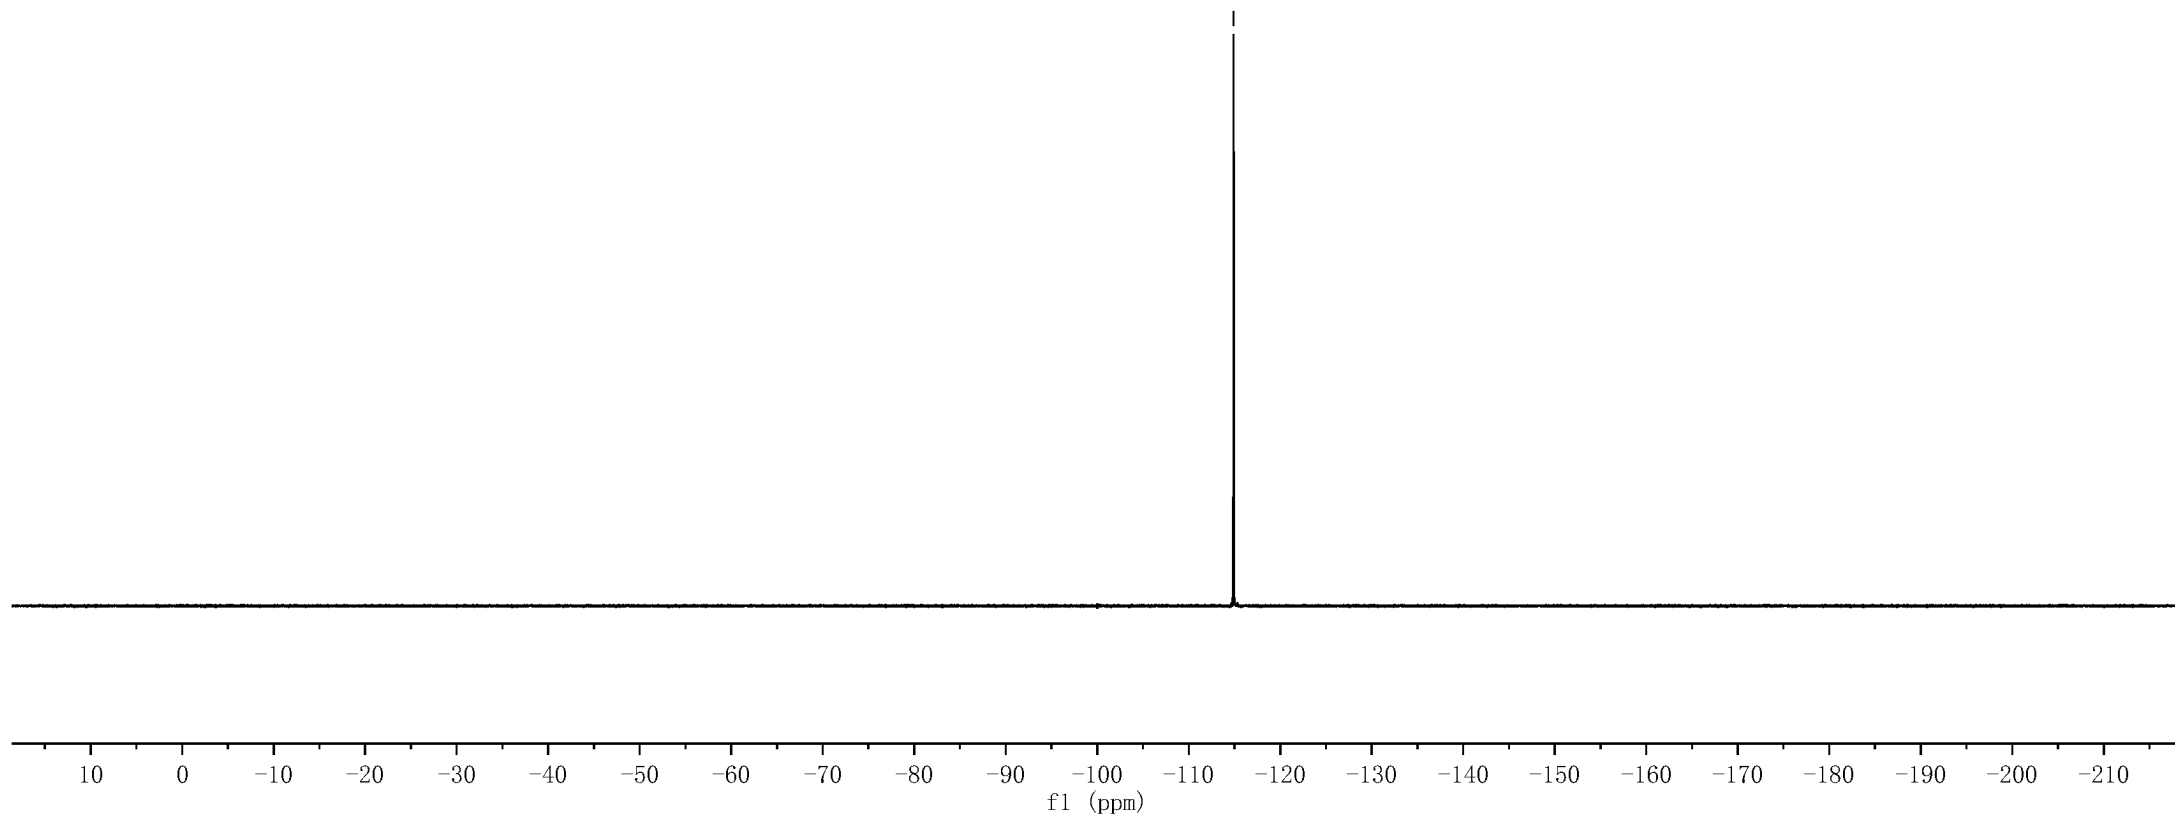



| Parameter                | Value               |
|--------------------------|---------------------|
| 1 Title                  | zyx-4-205-h-1       |
| 2 Origin                 | Bruker BioSpin GmbH |
| 3 Solvent                | CDCl3               |
| 4 Temperature            | 298.0               |
| 5 Number of Scans        | 7                   |
| 6 Acquisition Time       | 4.0894              |
| 7 Acquisition Date       | 2022-04-11T11:51:44 |
| 8 Spectrometer Frequency | 400.13              |
| 9 Spectral Width         | 8012.8              |

7.548  
7.528  
7.333  
7.315  
7.277

6.607  
6.586

4.462

2.982  
2.955

0.000

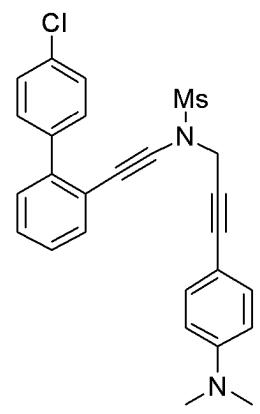

1h

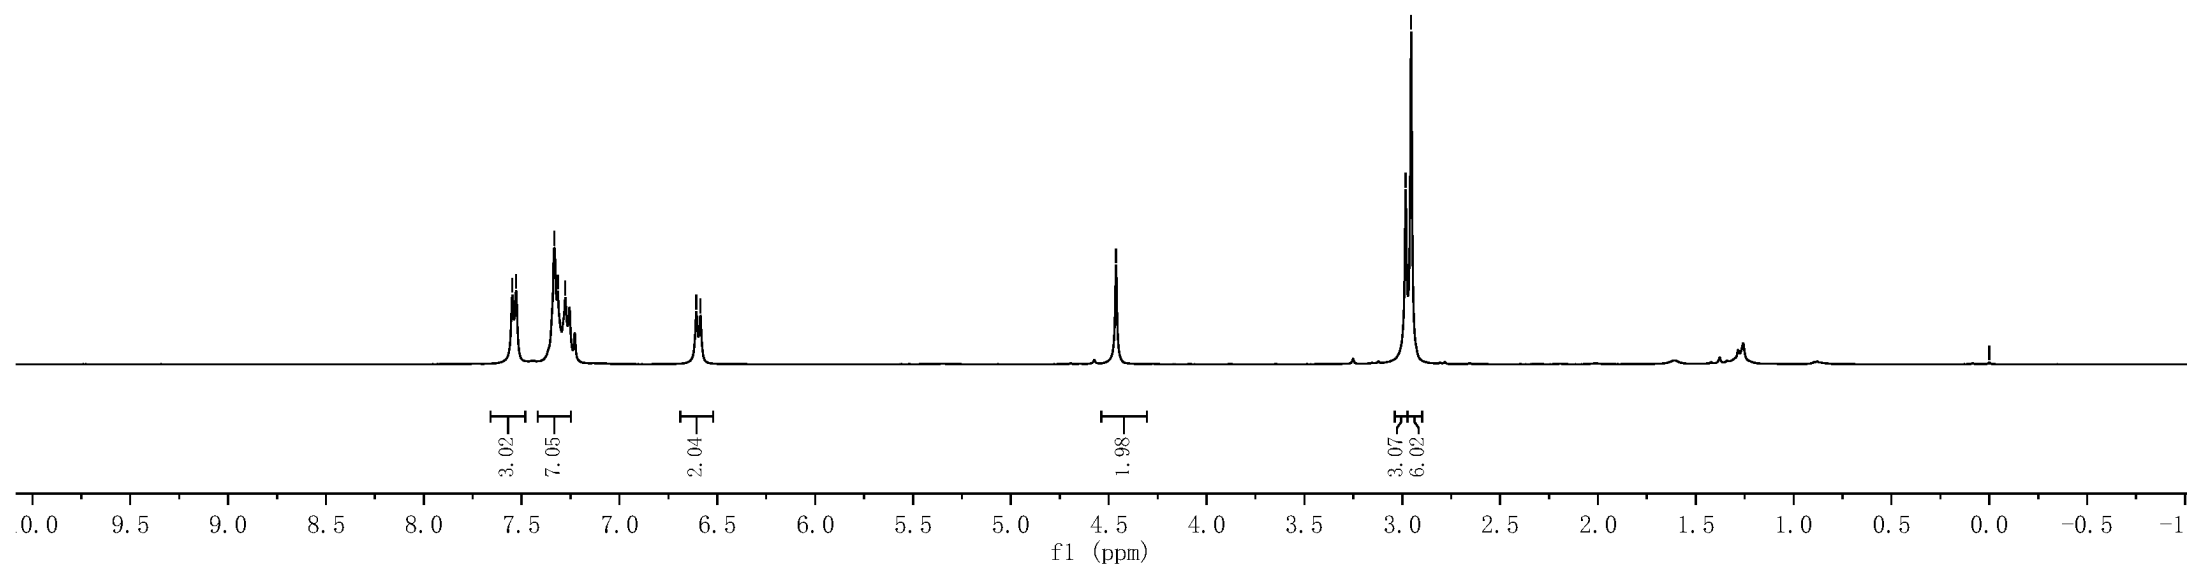

| Parameter                | Value               |
|--------------------------|---------------------|
| 1 Title                  | zyx-4-205-c-1       |
| 2 Origin                 | Bruker BioSpin GmbH |
| 3 Solvent                | CDC13               |
| 4 Temperature            | 300.0               |
| 5 Number of Scans        | 44                  |
| 6 Acquisition Time       | 1.3631              |
| 7 Acquisition Date       | 2022-04-11T11:52:57 |
| 8 Spectrometer Frequency | 100.61              |
| 9 Spectral Width         | 24038.5             |

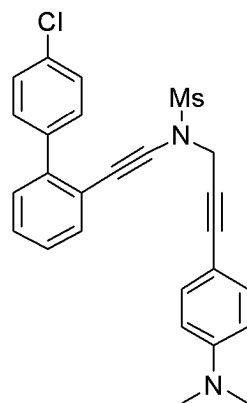

1h

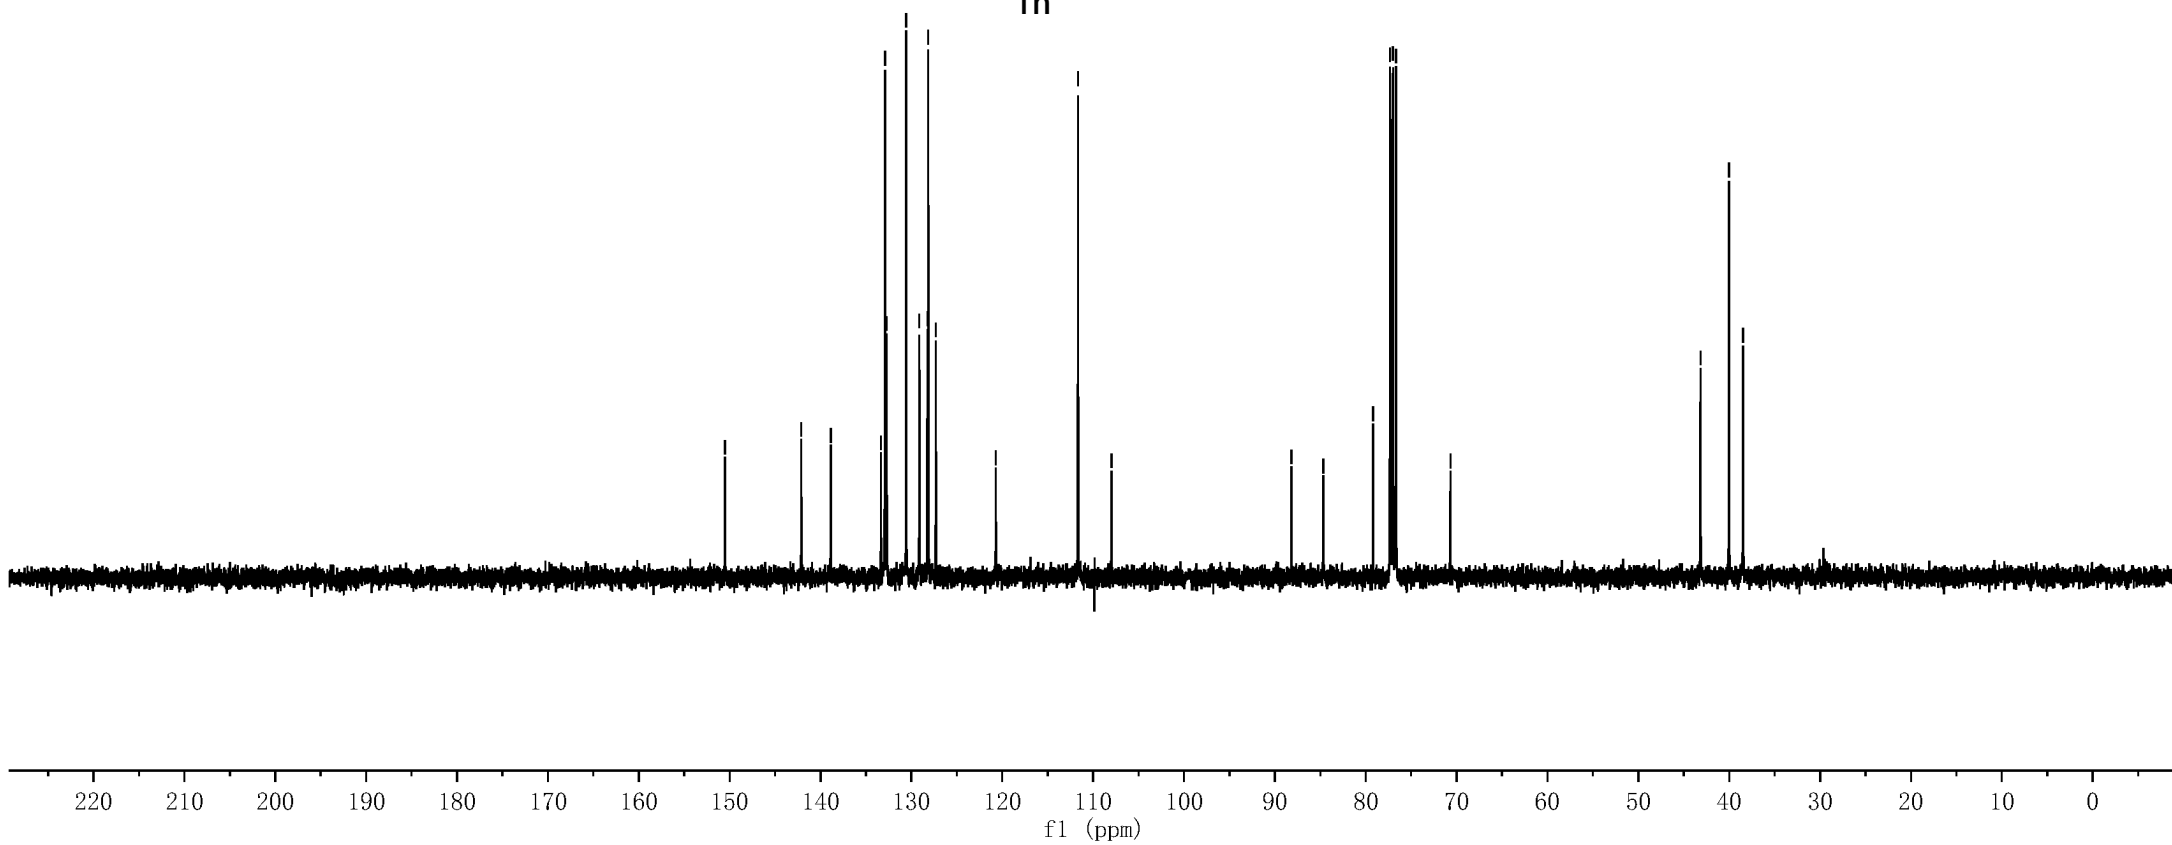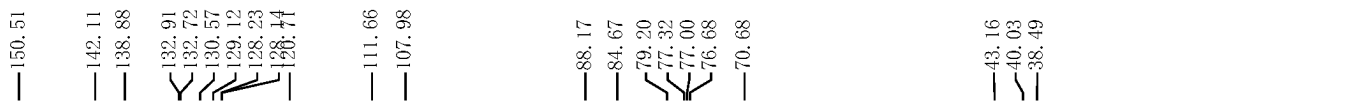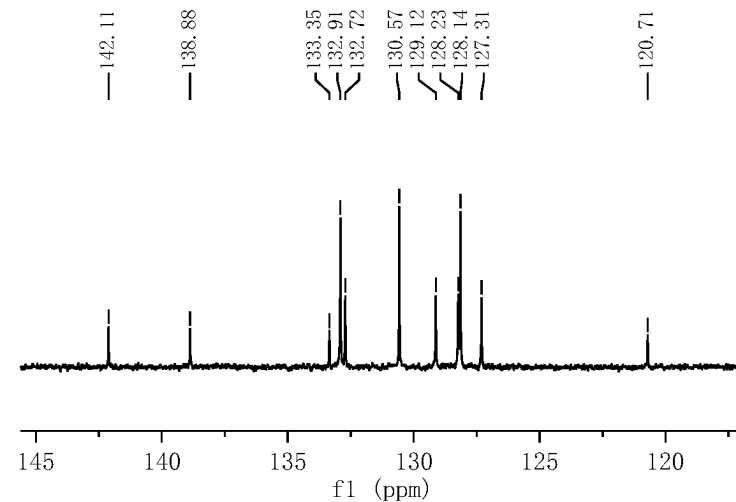

| Parameter                | Value               |
|--------------------------|---------------------|
| 1 Title                  | zyx-5-47-h          |
| 2 Origin                 | Bruker BioSpin GmbH |
| 3 Solvent                | CDC13               |
| 4 Temperature            | 294.5               |
| 5 Number of Scans        | 10                  |
| 6 Acquisition Time       | 3.9846              |
| 7 Acquisition Date       | 2022-05-10T15:35:46 |
| 8 Spectrometer Frequency | 399.93              |
| 9 Spectral Width         | 8223.7              |

7.550  
7.547  
7.531  
7.410  
7.407  
7.388  
7.350  
7.347  
7.338  
7.316  
7.300  
7.281  
7.246  
7.241  
7.224  
6.997  
6.975  
6.959  
6.587  
6.565

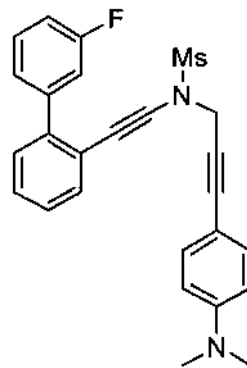

1i

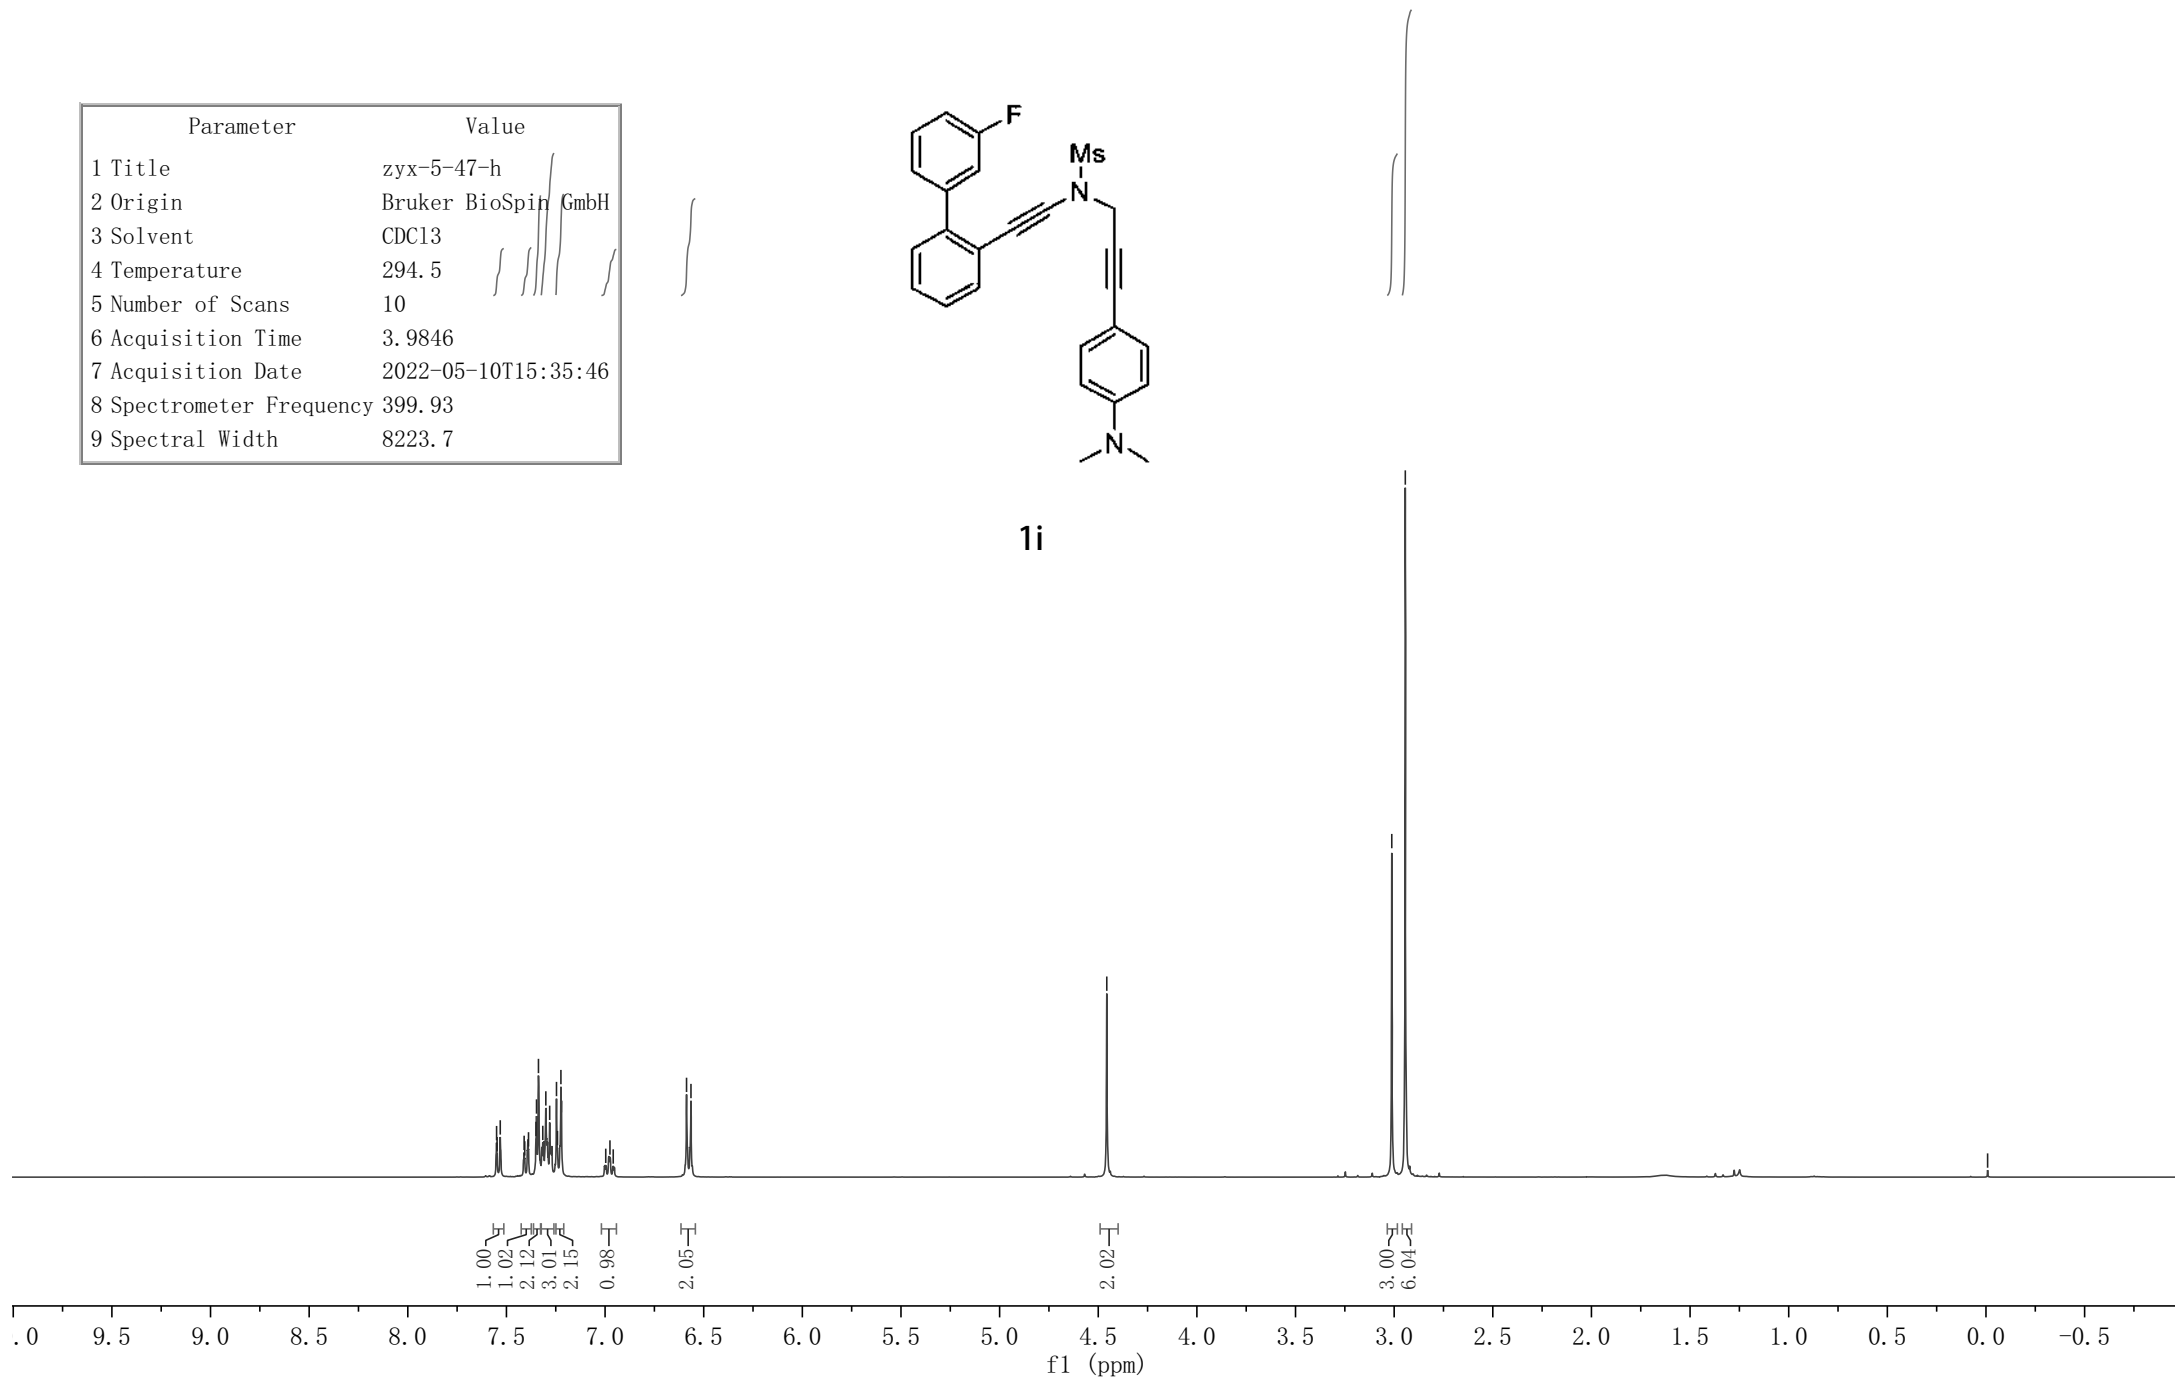

3.012  
2.943

0.008

| Parameter                | Value               |
|--------------------------|---------------------|
| 1 Title                  | zyx-5-47-c          |
| 2 Origin                 | Bruker BioSpin GmbH |
| 3 Solvent                | CDC13               |
| 4 Temperature            | 294.8               |
| 5 Number of Scans        | 52                  |
| 6 Acquisition Time       | 1.3631              |
| 7 Acquisition Date       | 2022-05-10T15:37:09 |
| 8 Spectrometer Frequency | 100.56              |
| 9 Spectral Width         | 24038.5             |

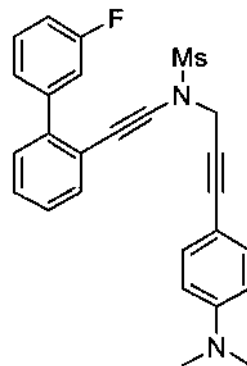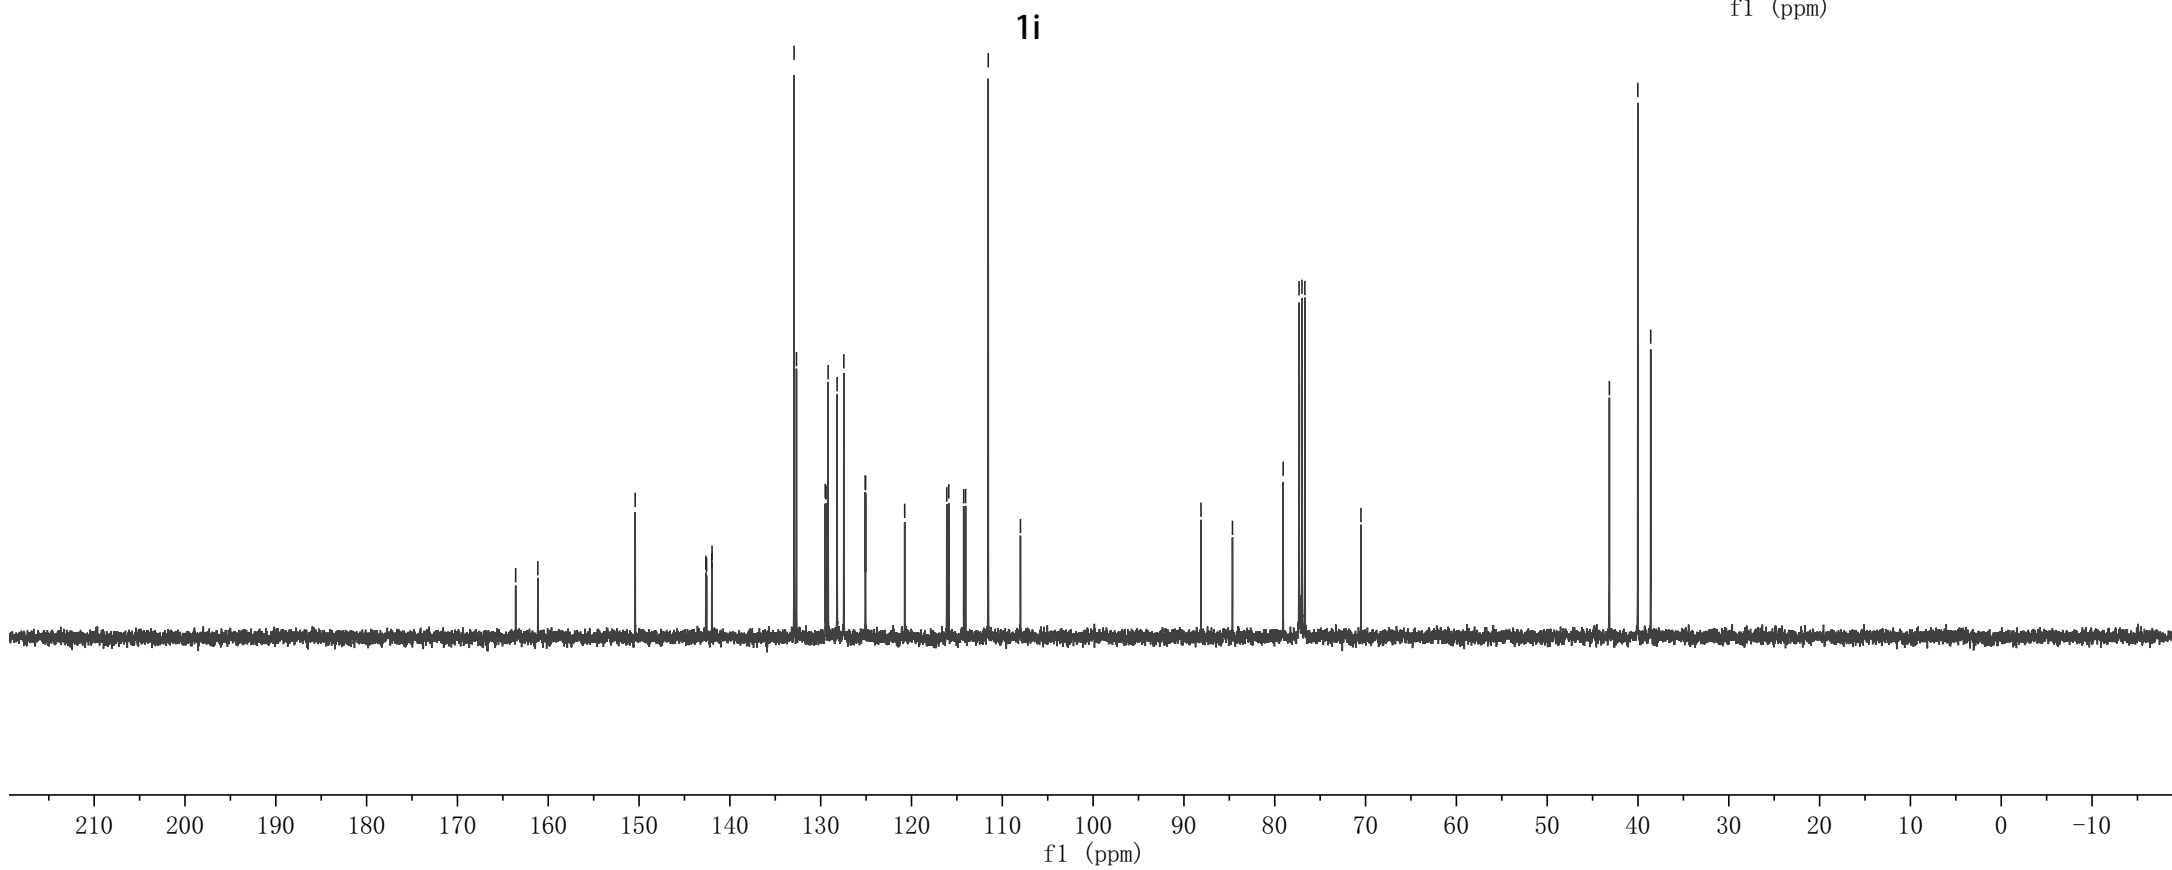

163.59  
161.15

150.43

142.65

142.57

141.98

141.96

132.93

132.67

129.50

129.42

129.18

128.19

127.45

125.09

125.06

120.75

116.11

115.90

114.25

114.04

111.55

108.00

88.12

84.66

79.07

77.32

77.00

76.68

70.51

43.15

40.02

38.60

132.93

132.67

129.50

129.42

129.18

128.19

127.45

125.09

125.06

120.75

116.11

115.90

114.25

114.04

111.55

108.00

130

125

f1 (ppm)

115

110

210

200

190

180

170

160

150

140

130

120

110

100

90

80

70

60

50

40

30

20

10

0

-10

f1 (ppm)

| Parameter                | Value               |
|--------------------------|---------------------|
| 1 Title                  | zyx-11-74-s-f       |
| 2 Origin                 |                     |
| 3 Solvent                | CDC13               |
| 4 Temperature            | 297.5               |
| 5 Number of Scans        | 16                  |
| 6 Acquisition Time       | 1.0000              |
| 7 Acquisition Date       | 2023-11-21T17:21:37 |
| 8 Spectrometer Frequency | 376.28              |
| 9 Spectral Width         | 96153.0             |

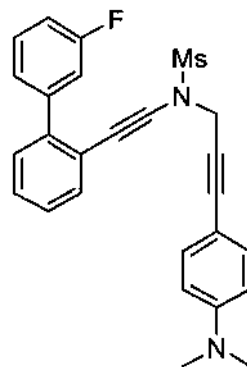

**1i**

-113.35  
-113.38  
-113.39  
-113.42

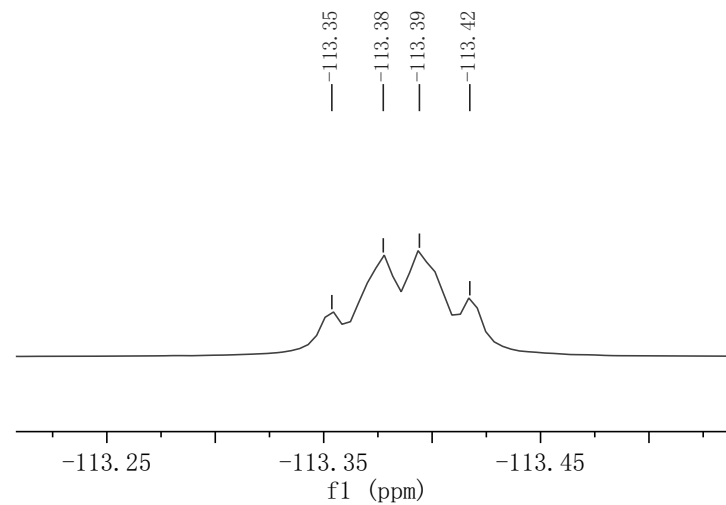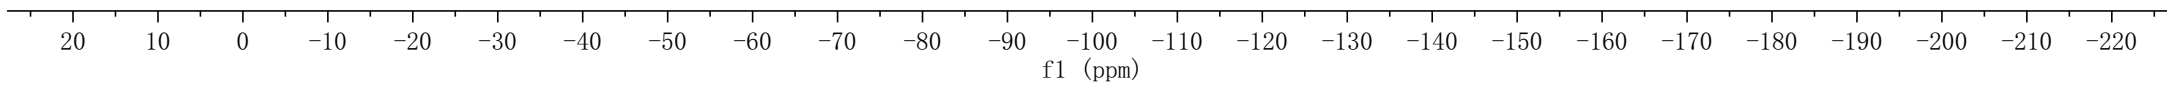

| Parameter                | Value               |
|--------------------------|---------------------|
| 1 Title                  | 4                   |
| 2 Origin                 | Bruker BioSpin GmbH |
| 3 Solvent                | CDCl3               |
| 4 Temperature            | 297.6               |
| 5 Number of Scans        | 9                   |
| 6 Acquisition Time       | 3.1719              |
| 7 Acquisition Date       | 2022-04-13T21:52:48 |
| 8 Spectrometer Frequency | 500.17              |
| 9 Spectral Width         | 10330.6             |

7.548  
7.533  
7.478  
7.345  
7.332  
7.302  
7.274

6.459  
6.442

4.467

3.282  
3.269  
3.256

2.978

2.002  
1.994  
1.988  
1.982  
1.975

0.000

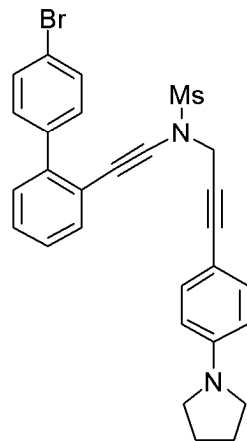

1j

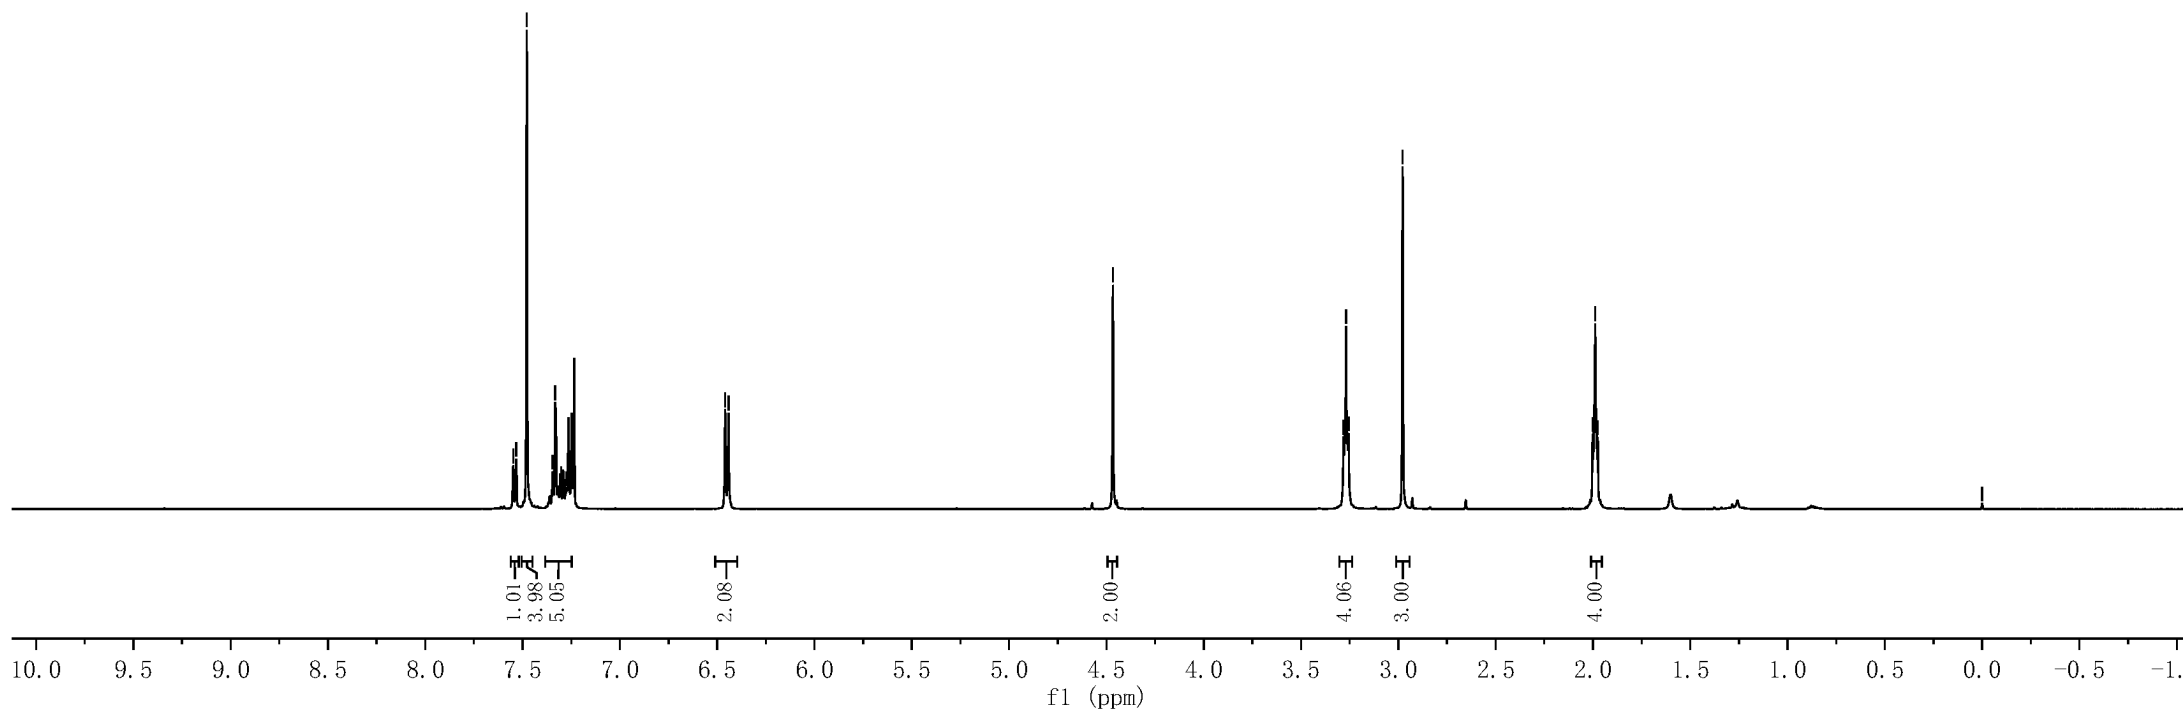

| Parameter                | Value               |
|--------------------------|---------------------|
| 1 Title                  | zyx-4-213-c         |
| 2 Origin                 | Bruker BioSpin GmbH |
| 3 Solvent                | CDCl3               |
| 4 Temperature            | 297.7               |
| 5 Number of Scans        | 28                  |
| 6 Acquisition Time       | 1.1010              |
| 7 Acquisition Date       | 2022-04-13T21:53:59 |
| 8 Spectrometer Frequency | 125.77              |
| 9 Spectral Width         | 29761.9             |

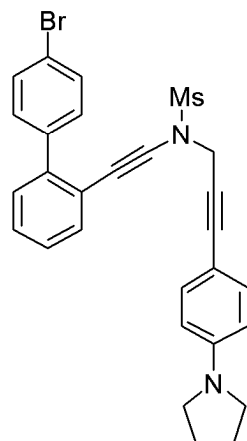

1j

148.00 142.13 139.35 133.02 132.72 131.11 130.91 129.05 127.34 120.69 111.34 106.99 88.54 84.75 78.96 77.25 77.00 76.75 70.63 47.40 43.25 38.48 25.37

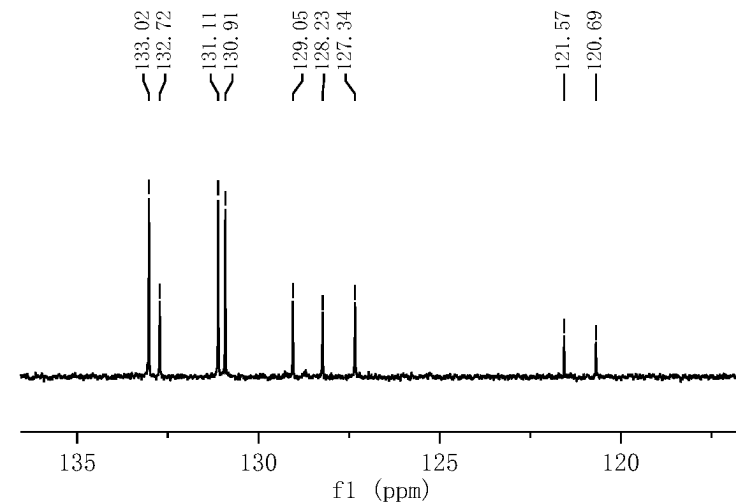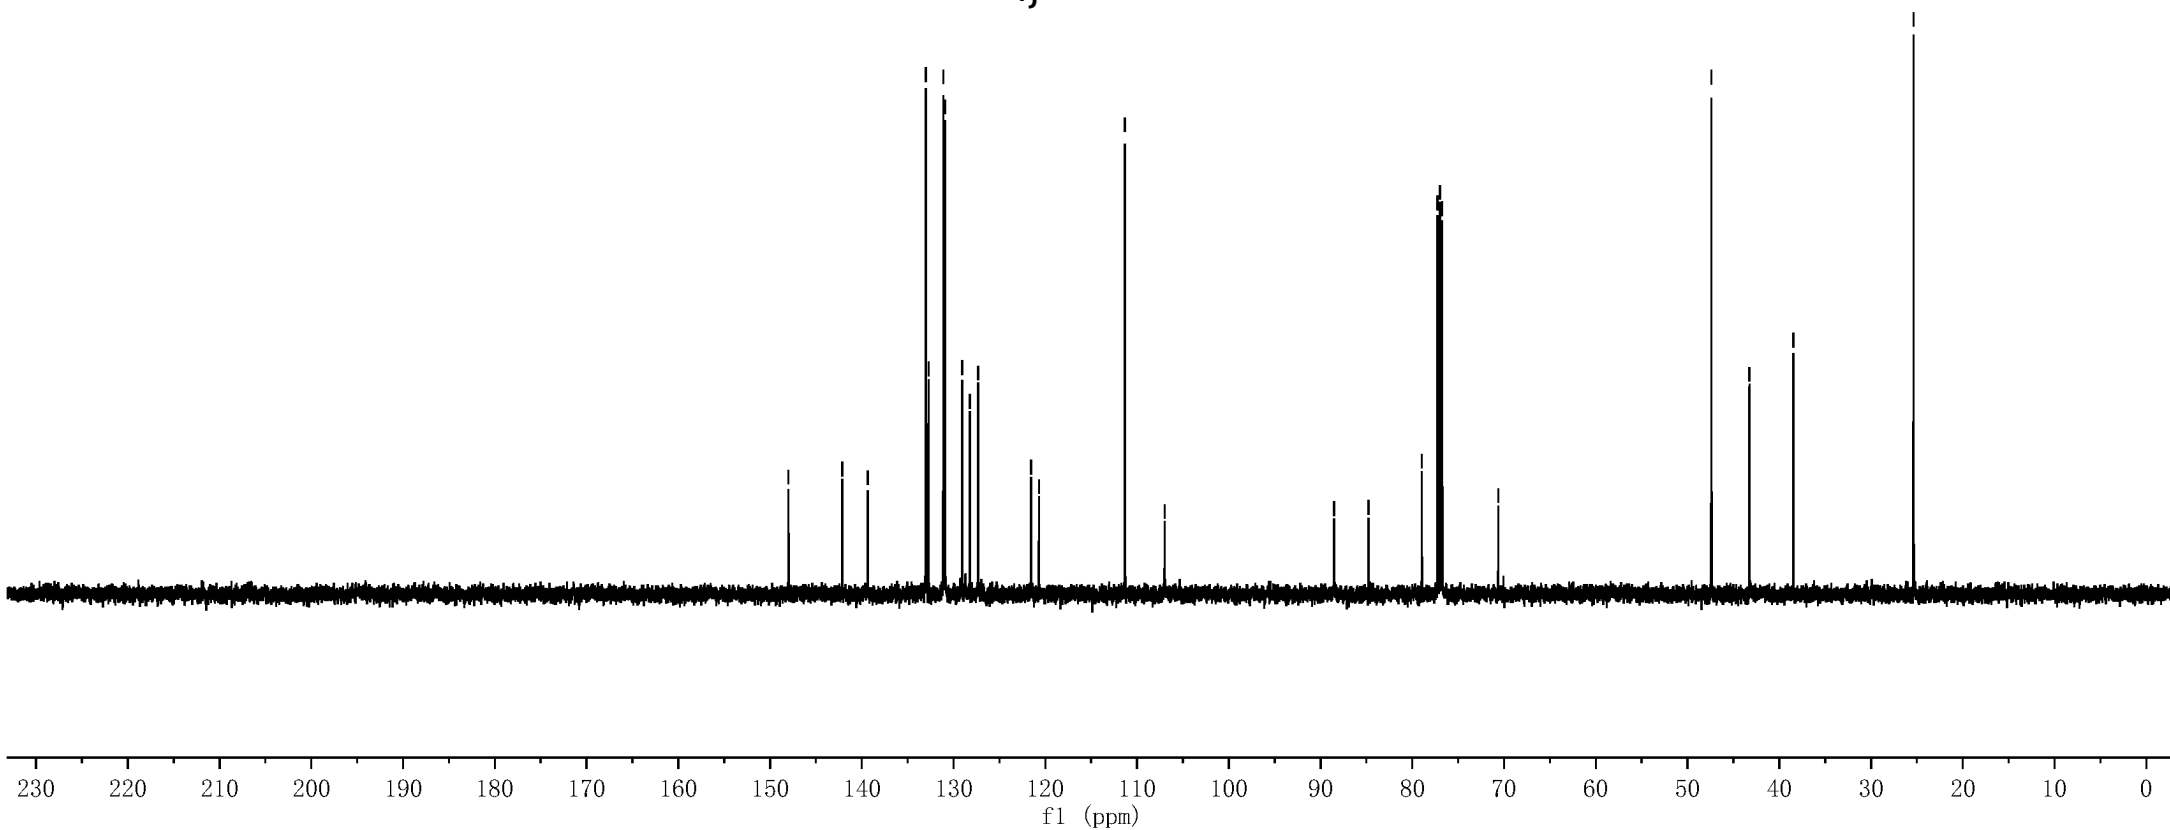

| Parameter                | Value               |
|--------------------------|---------------------|
| 1 Title                  | ZYX-4-206-H         |
| 2 Origin                 | Bruker BioSpin GmbH |
| 3 Solvent                | CDC13               |
| 4 Temperature            | 295.5               |
| 5 Number of Scans        | 7                   |
| 6 Acquisition Time       | 3.9846              |
| 7 Acquisition Date       | 2022-04-11T22:08:11 |
| 8 Spectrometer Frequency | 399.93              |
| 9 Spectral Width         | 8223.7              |

7.531  
7.528  
7.514  
7.446  
7.326  
7.313  
7.294  
7.266  
7.257  
7.243  
7.202  
7.197  
7.192  
6.645  
6.623

4.650

4.429

2.945

0.000

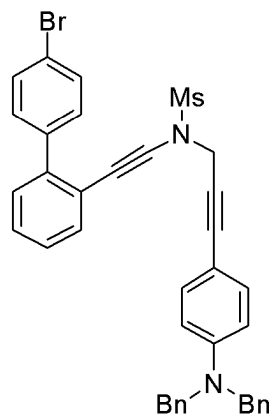

1k

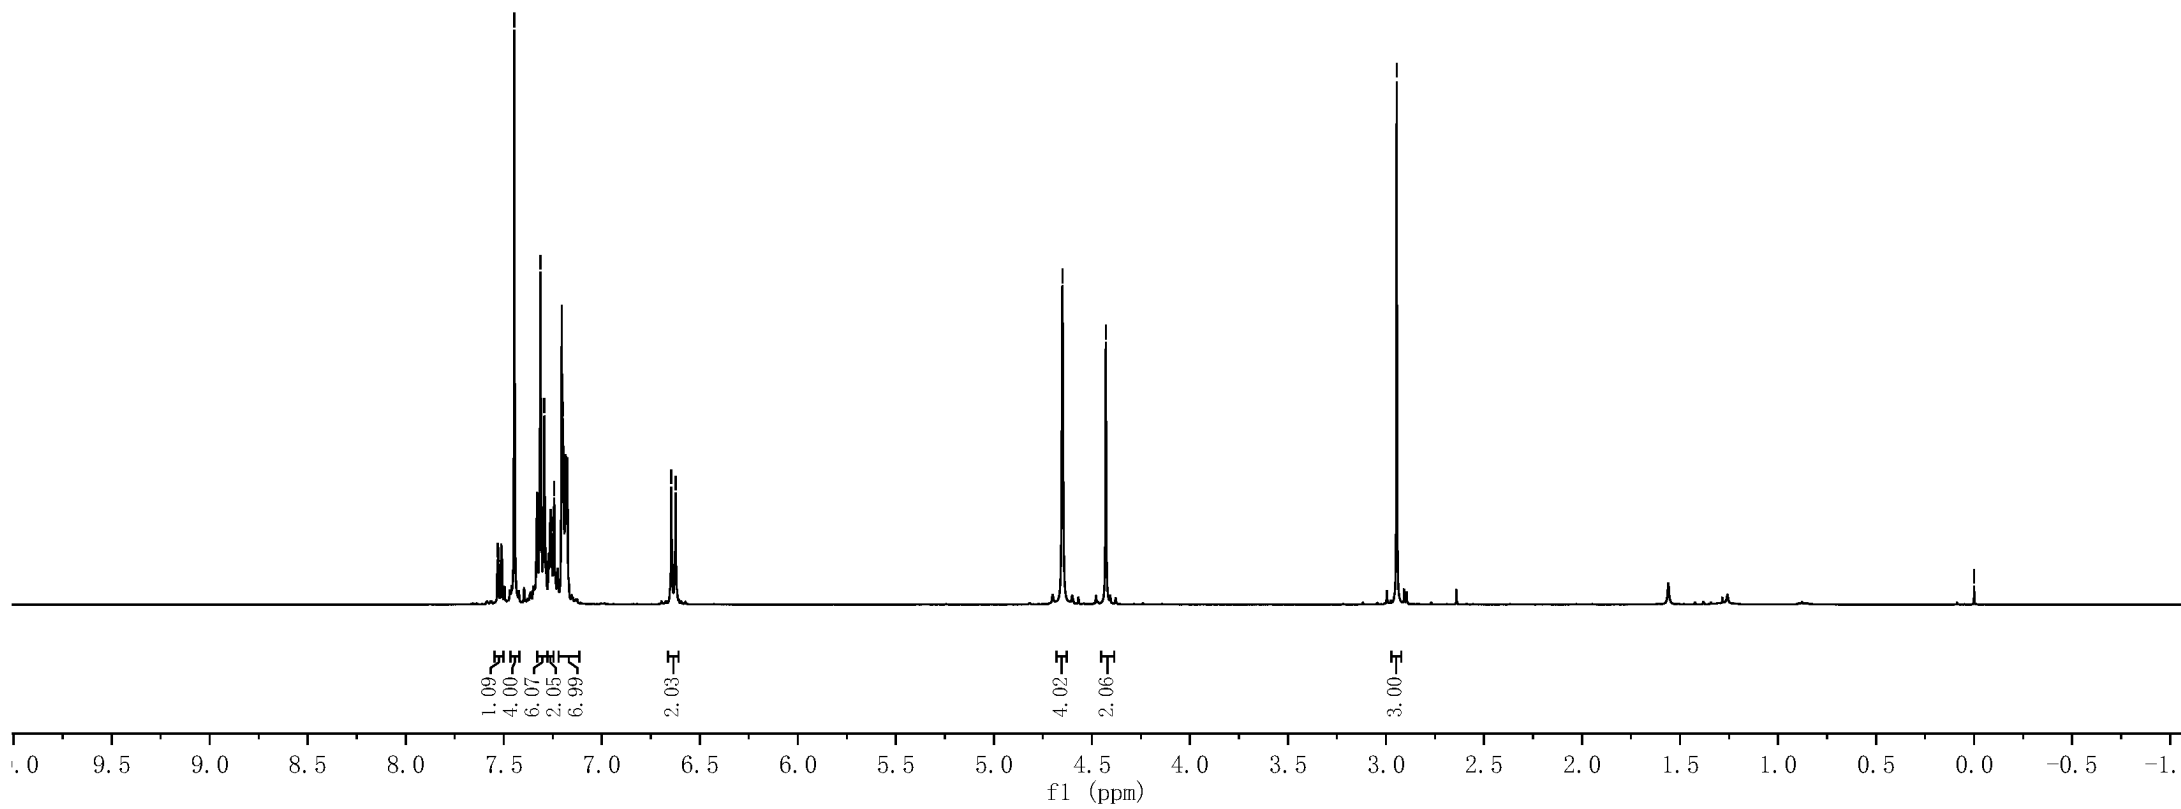



| Parameter                | Value               |
|--------------------------|---------------------|
| 1 Title                  | ZYX-4-206-C         |
| 2 Origin                 | Bruker BioSpin GmbH |
| 3 Solvent                | CDCl3               |
| 4 Temperature            | 295.7               |
| 5 Number of Scans        | 43                  |
| 6 Acquisition Time       | 1.3631              |
| 7 Acquisition Date       | 2022-04-11T22:09:30 |
| 8 Spectrometer Frequency | 100.56              |
| 9 Spectral Width         | 24038.5             |

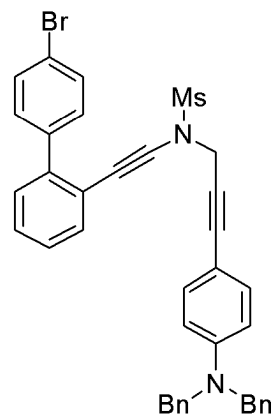

1k

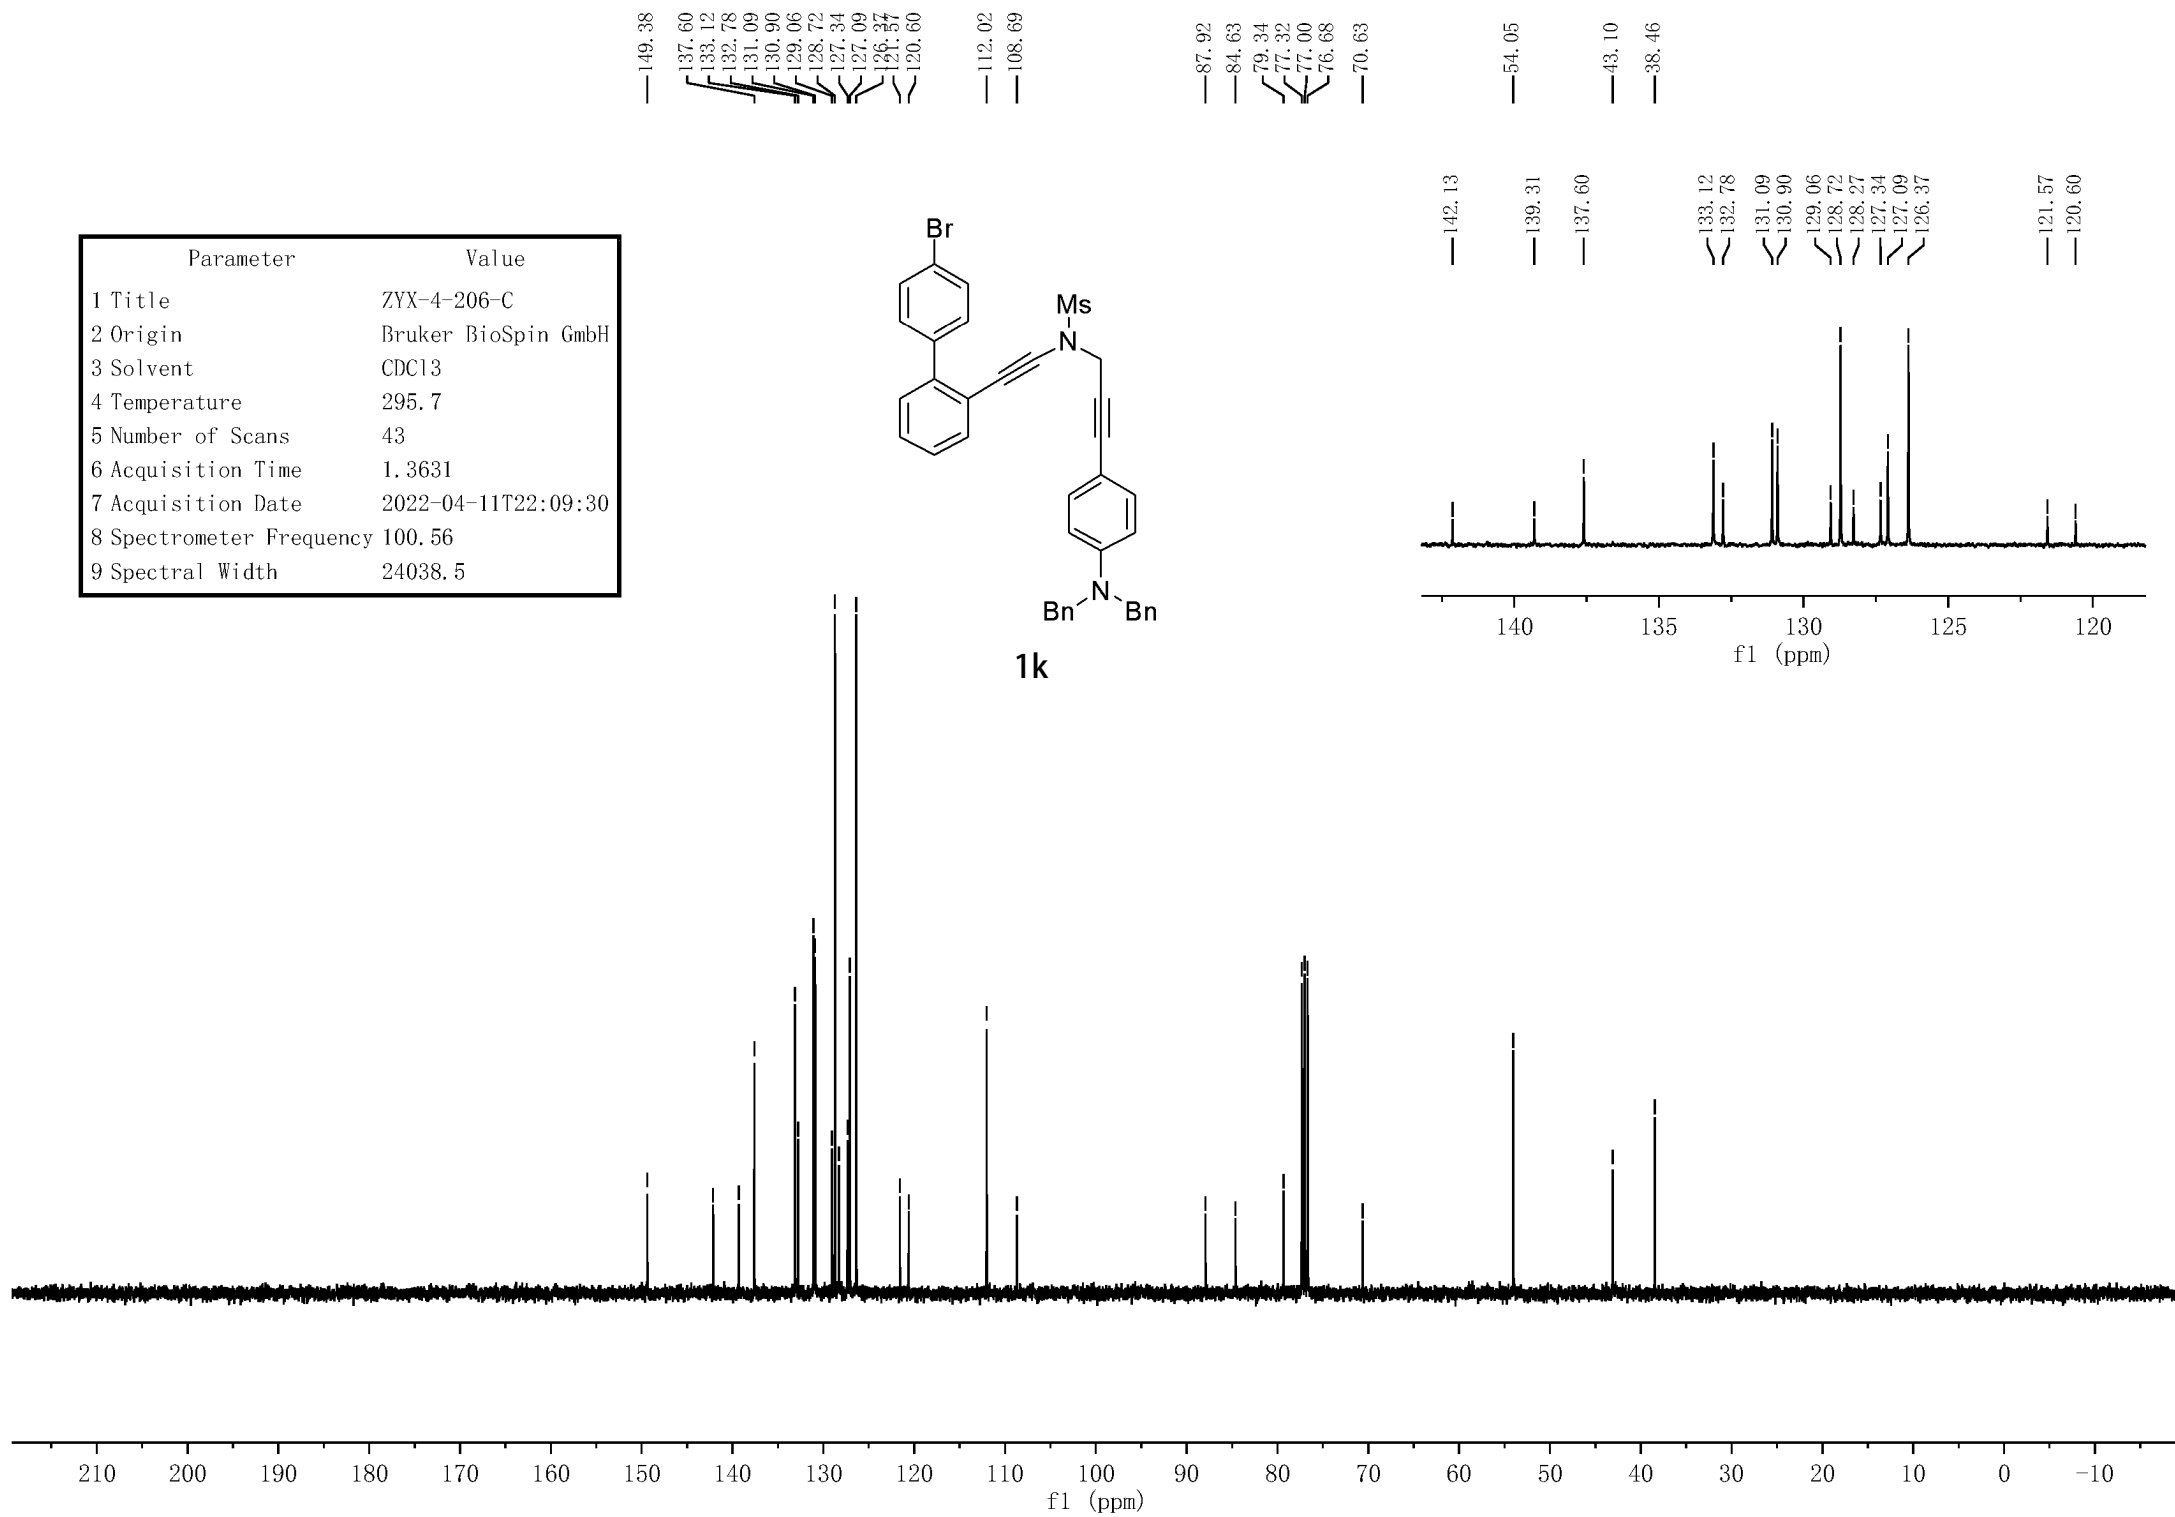

| Parameter                | Value               |
|--------------------------|---------------------|
| 1 Title                  | zyx-4-217-h         |
| 2 Origin                 | Bruker BioSpin GmbH |
| 3 Solvent                | CDCl3               |
| 4 Temperature            | 295.1               |
| 5 Number of Scans        | 16                  |
| 6 Acquisition Time       | 3.9846              |
| 7 Acquisition Date       | 2022-04-18T20:37:30 |
| 8 Spectrometer Frequency | 399.93              |
| 9 Spectral Width         | 8223.7              |

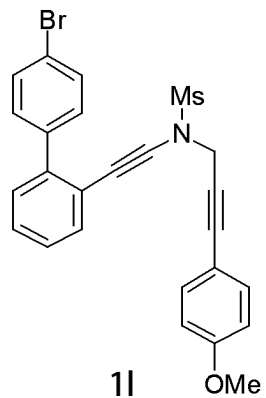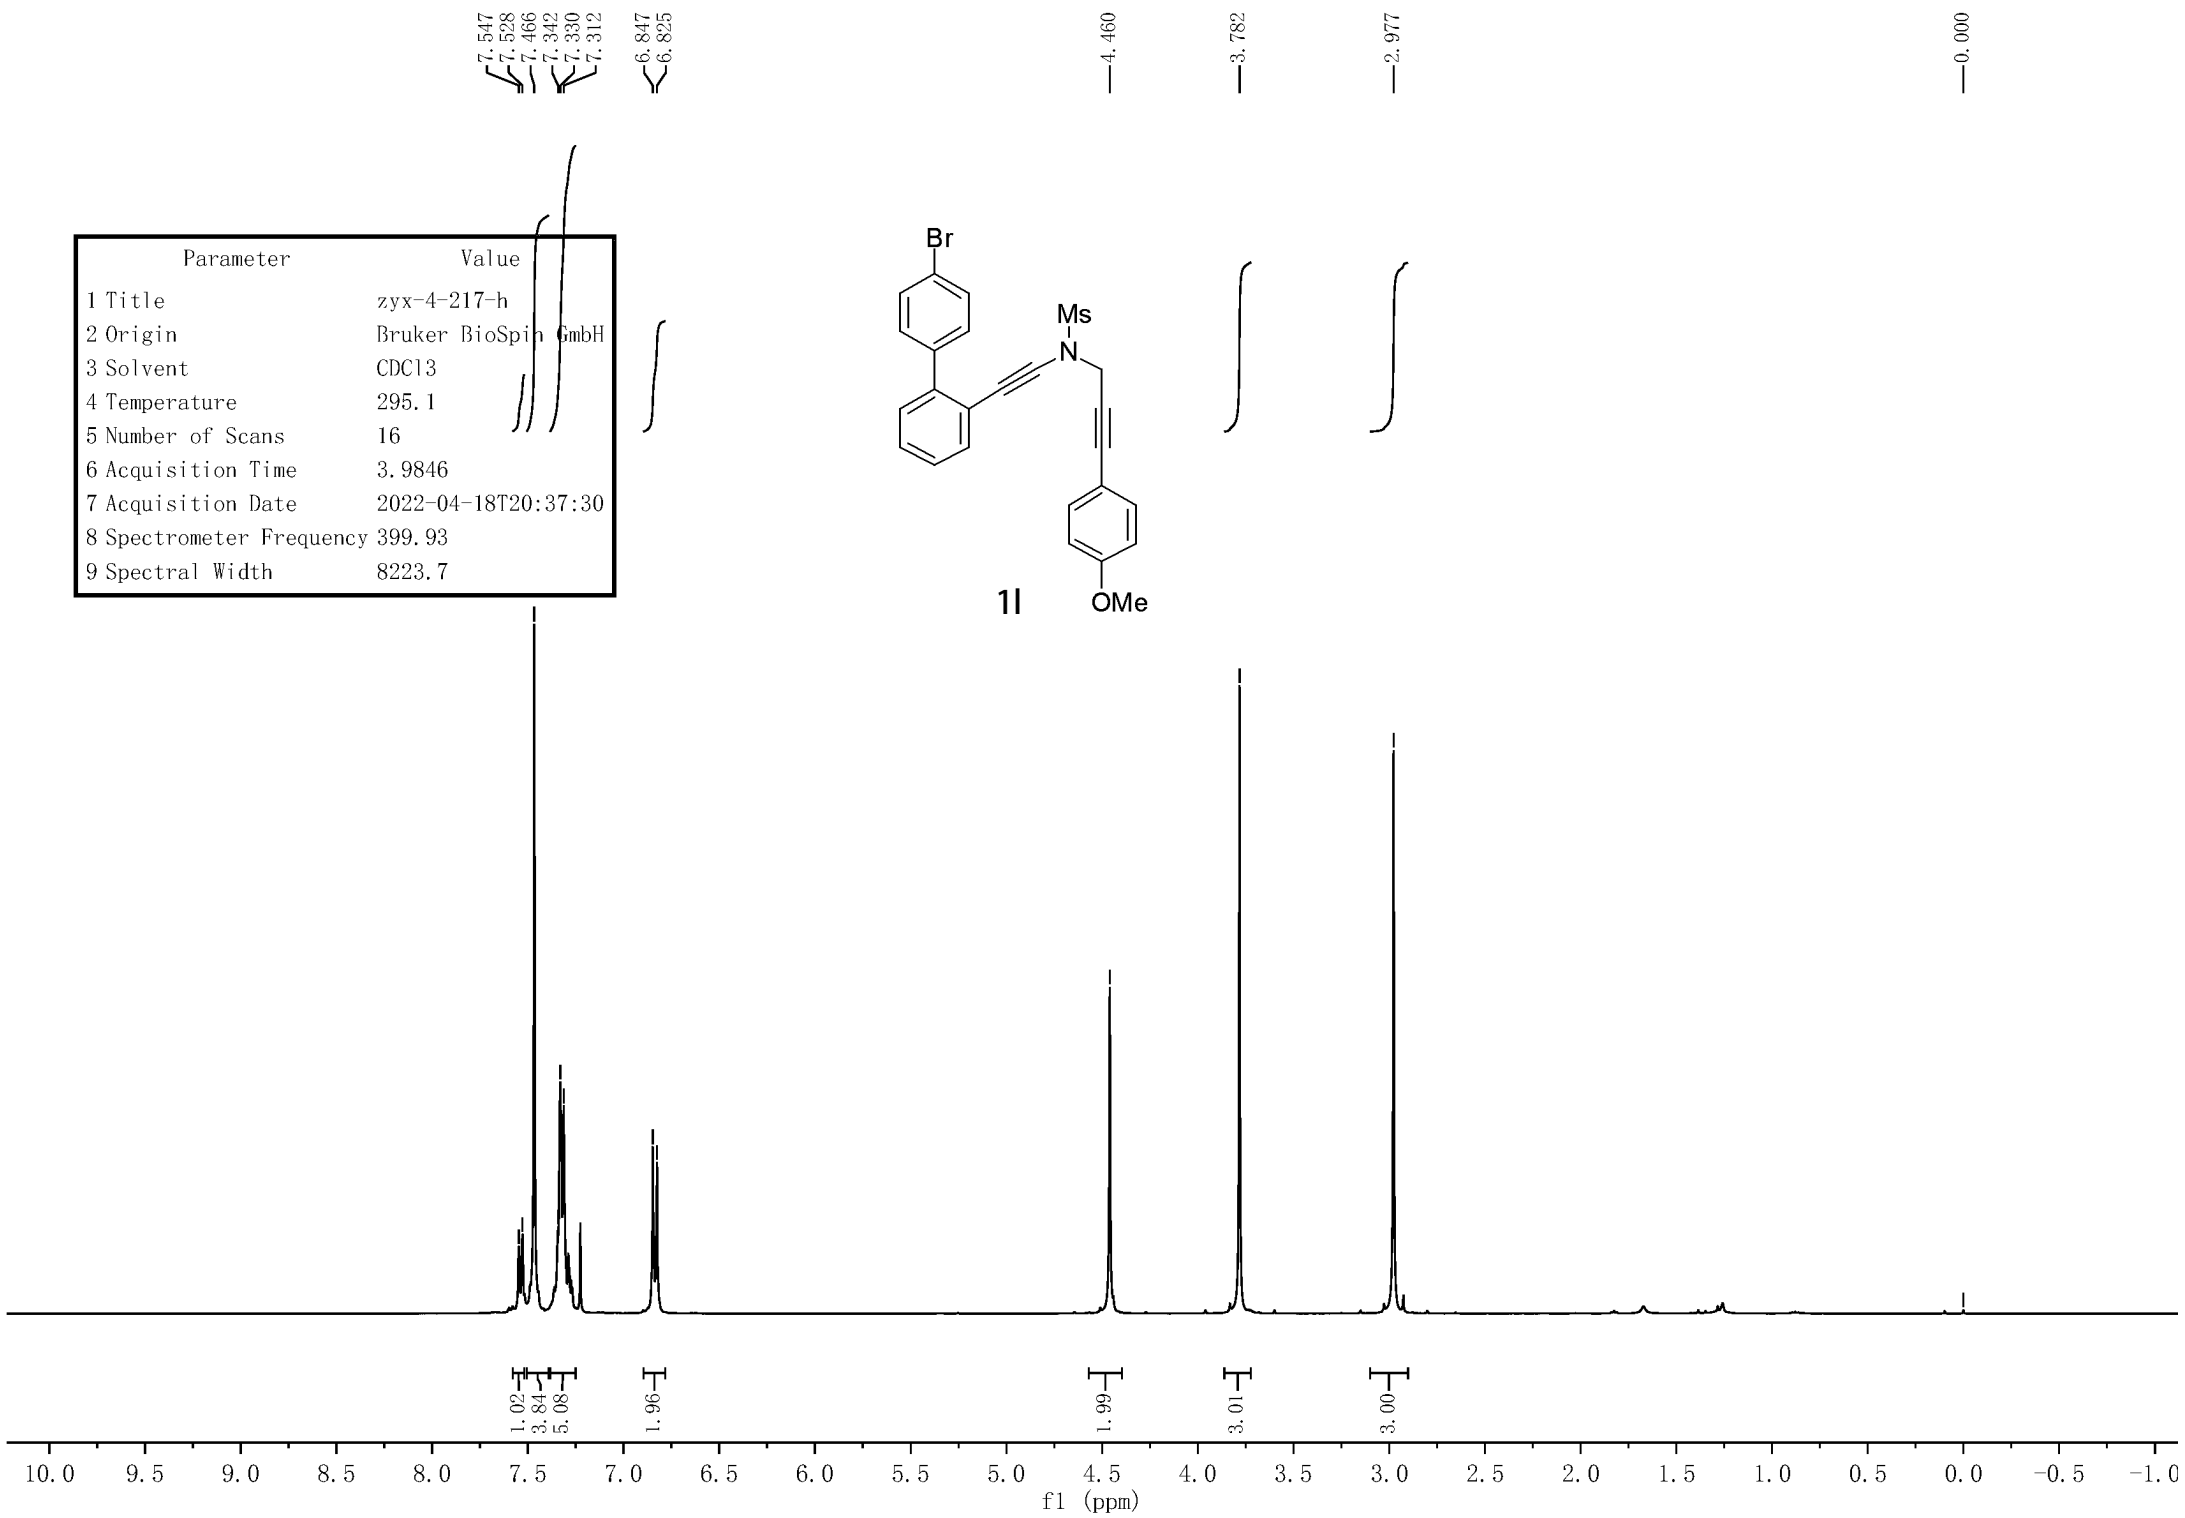

| Parameter                | Value               |
|--------------------------|---------------------|
| 1 Title                  | zyx-4-217-c         |
| 2 Origin                 | Bruker BioSpin GmbH |
| 3 Solvent                | CDCl3               |
| 4 Temperature            | 295.5               |
| 5 Number of Scans        | 140                 |
| 6 Acquisition Time       | 1.3631              |
| 7 Acquisition Date       | 2022-04-18T20:41:39 |
| 8 Spectrometer Frequency | 100.56              |
| 9 Spectral Width         | 24038.5             |

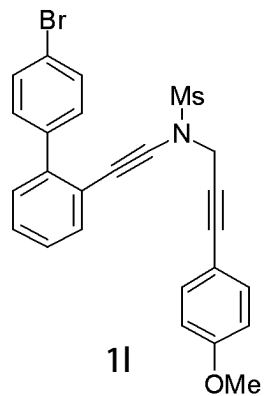

160.07

142.05  
139.26133.22  
132.67  
131.04  
130.83  
129.04  
127.33  
120.47  
114.03  
113.4586.84  
84.41  
80.08  
77.32  
77.00  
76.68  
70.73

55.21

42.75  
38.42

142.05

139.26

133.22  
132.67  
131.04  
130.83  
129.04  
128.29  
127.33121.53  
120.47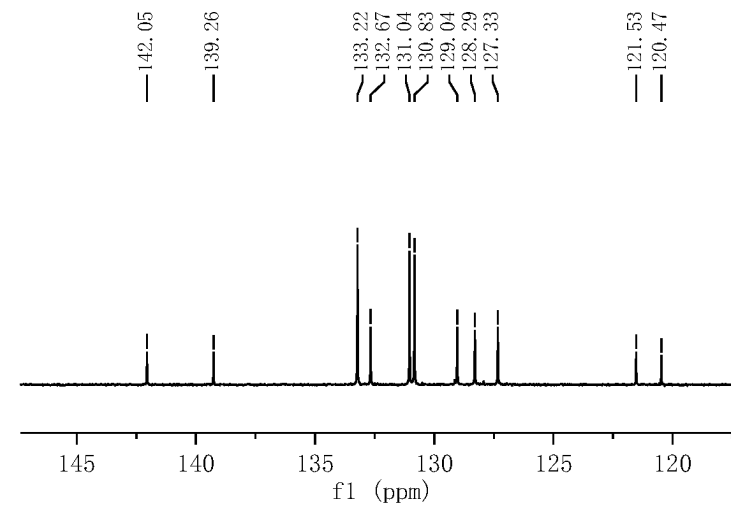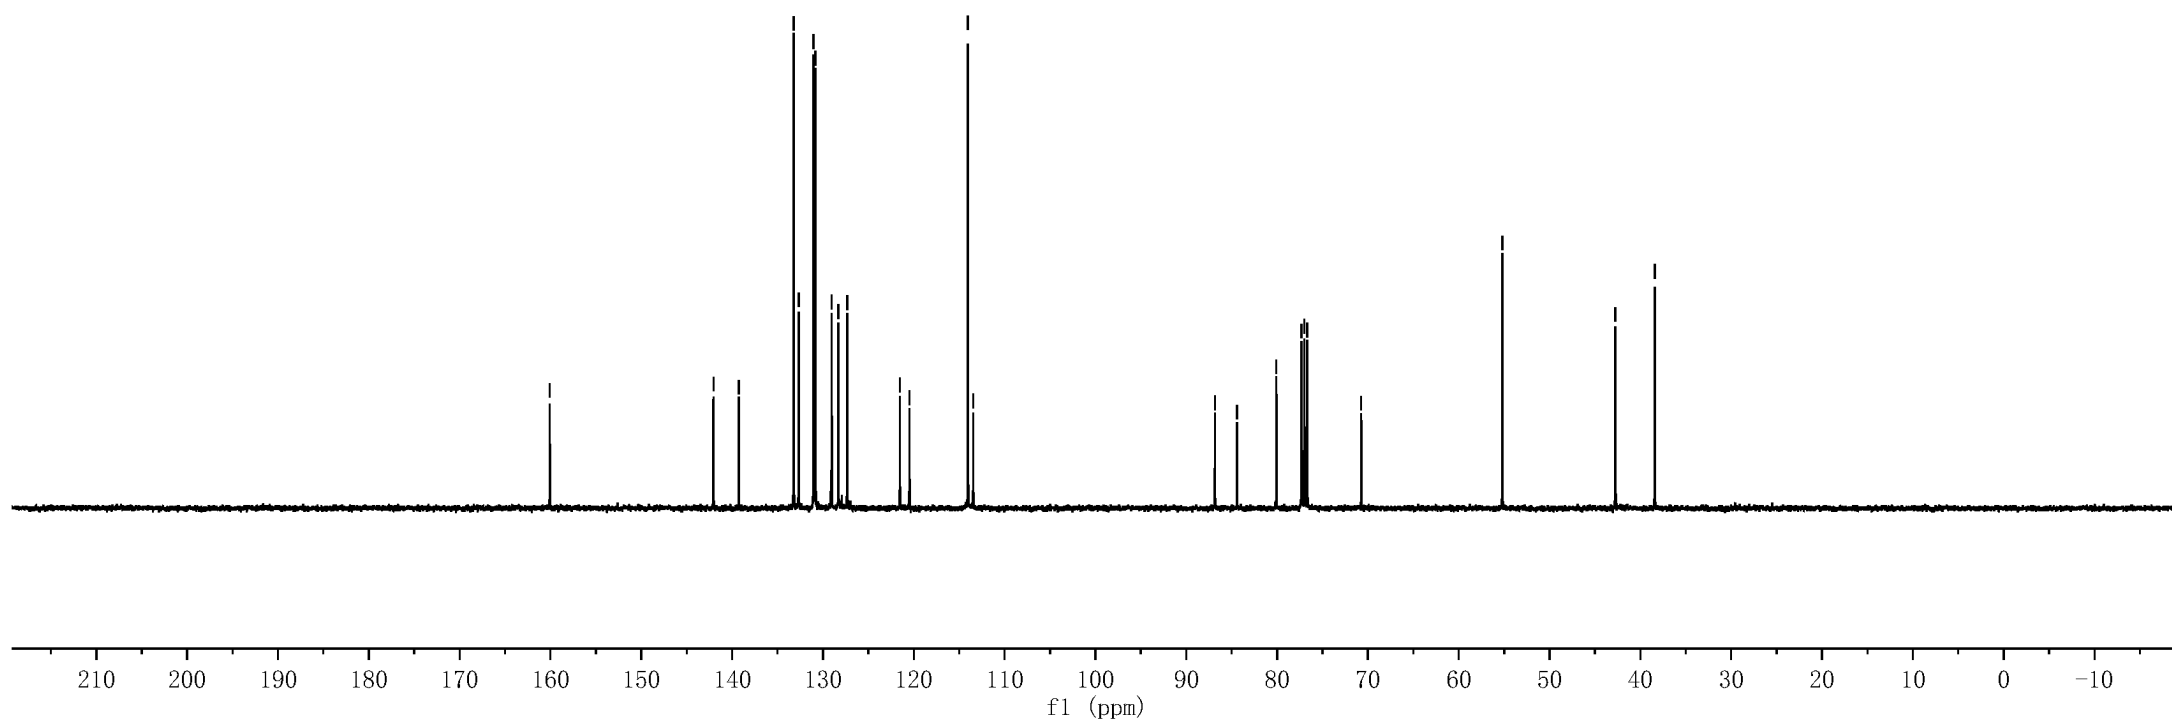

| Parameter                | Value               |
|--------------------------|---------------------|
| 1 Title                  | zyx-5-18-h          |
| 2 Origin                 | Bruker BioSpin GmbH |
| 3 Solvent                | CDCl3               |
| 4 Temperature            | 298.2               |
| 5 Number of Scans        | 9                   |
| 6 Acquisition Time       | 3.1719              |
| 7 Acquisition Date       | 2022-04-27T21:57:41 |
| 8 Spectrometer Frequency | 500.17              |
| 9 Spectral Width         | 10330.6             |

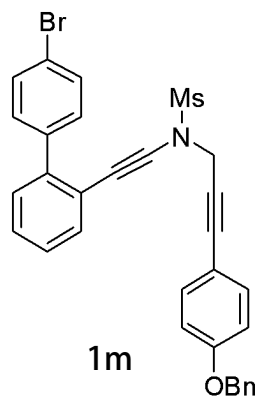

7.543  
7.528  
7.481  
7.463  
7.461  
7.443  
7.391  
7.368  
7.327  
7.301  
6.917  
6.899

5.051

4.451

2.966

0.000

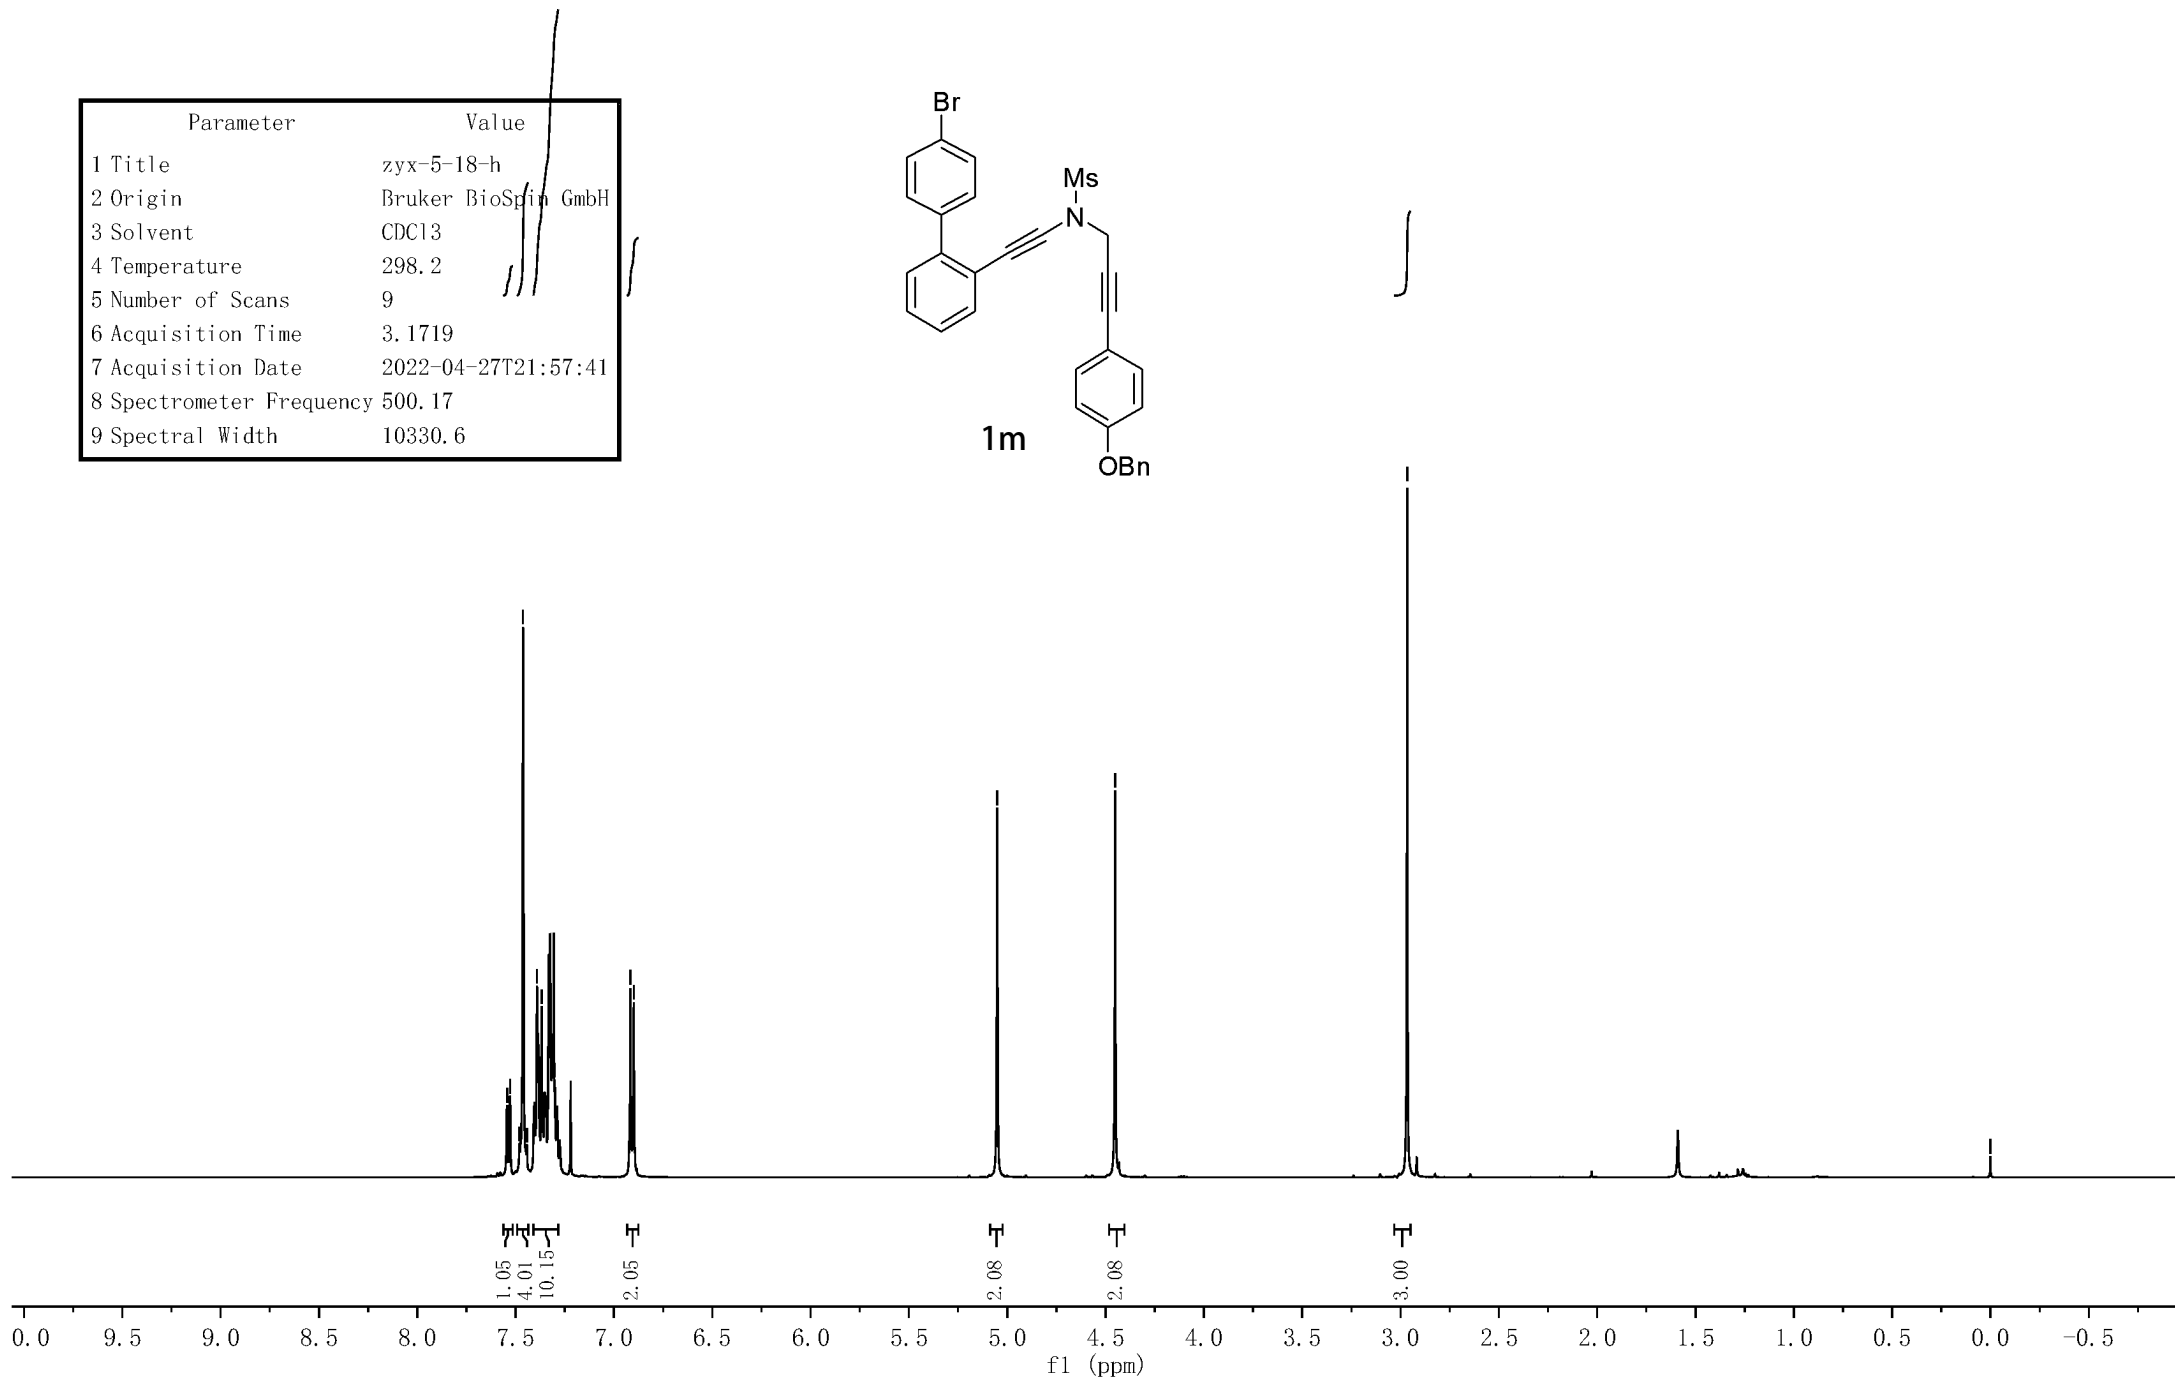

| Parameter                | Value               |
|--------------------------|---------------------|
| 1 Title                  | zyx-5-18-c          |
| 2 Origin                 | Bruker BioSpin GmbH |
| 3 Solvent                | CDCl3               |
| 4 Temperature            | 298.3               |
| 5 Number of Scans        | 36                  |
| 6 Acquisition Time       | 1.1010              |
| 7 Acquisition Date       | 2022-04-27T22:00:33 |
| 8 Spectrometer Frequency | 125.77              |
| 9 Spectral Width         | 29761.9             |

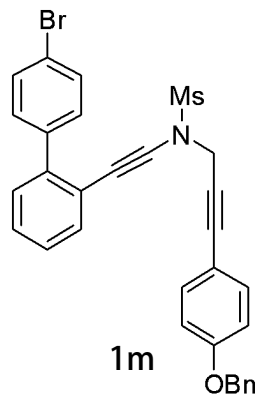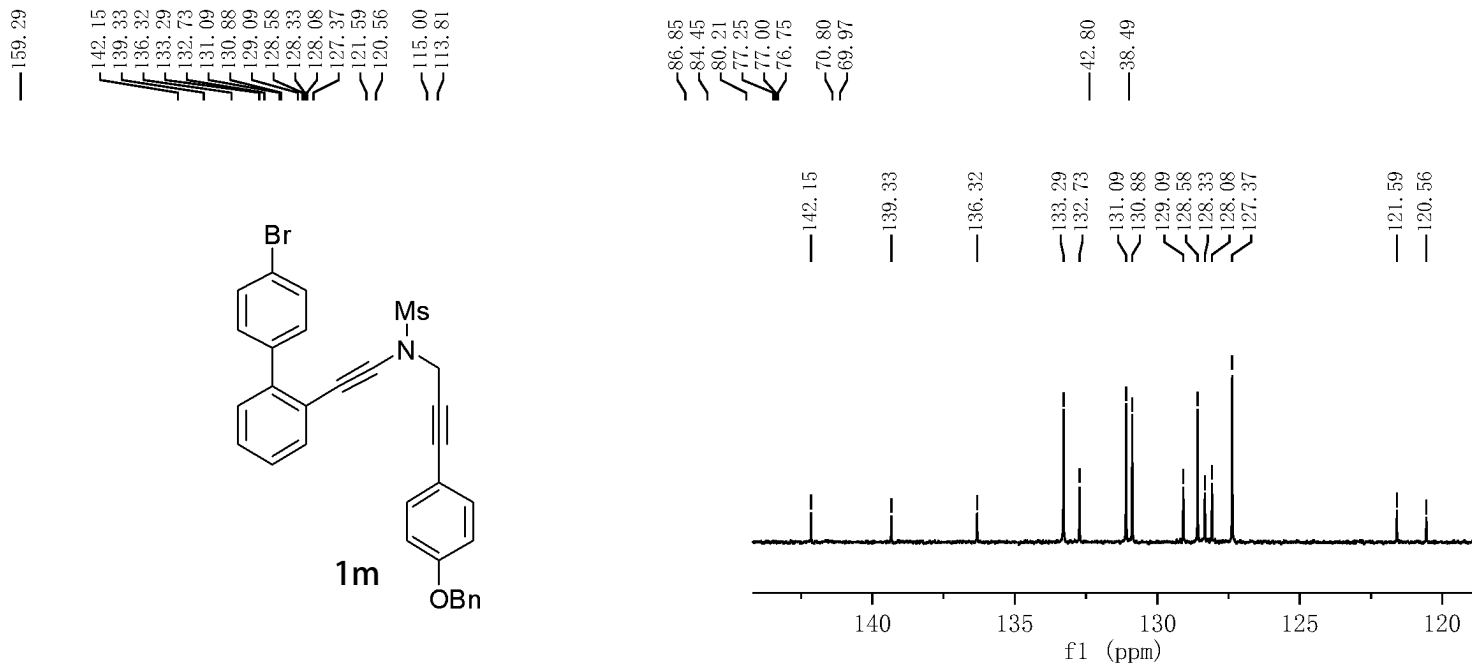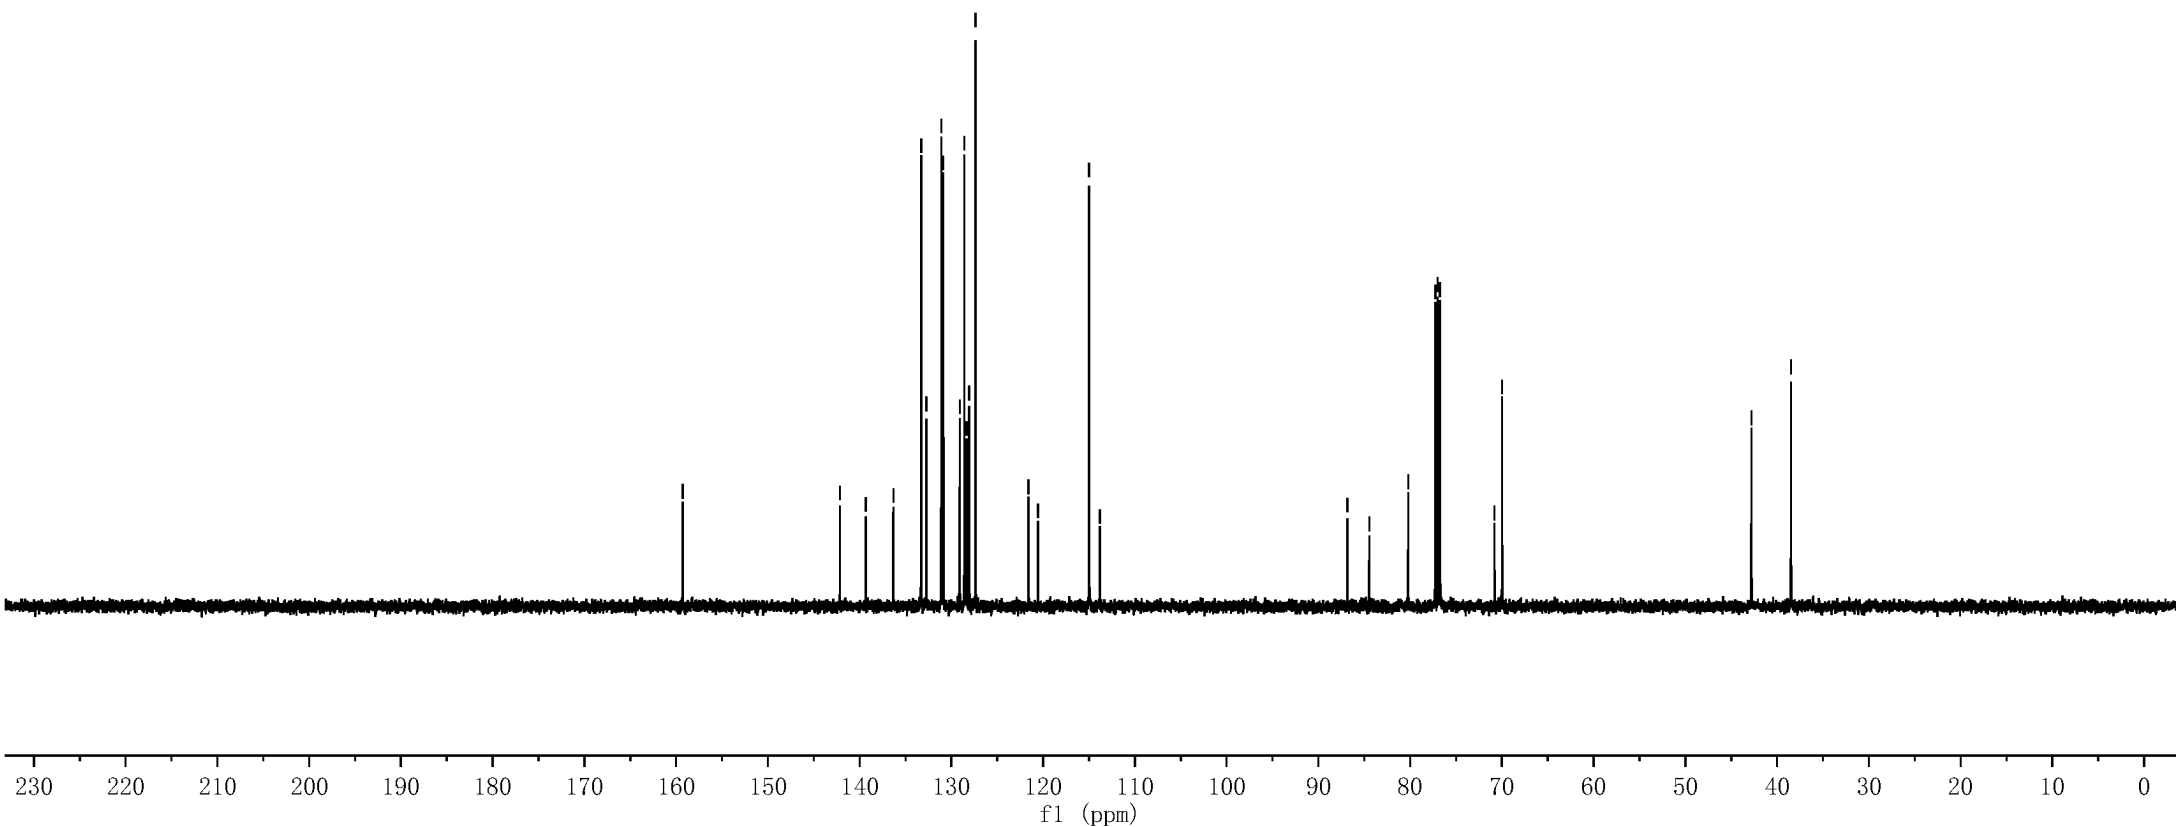

| Parameter                | Value               |
|--------------------------|---------------------|
| 1 Title                  | zyx-4-239-H         |
| 2 Origin                 | Bruker BioSpir GmbH |
| 3 Solvent                | CDCl3               |
| 4 Temperature            | 295.3               |
| 5 Number of Scans        | 10                  |
| 6 Acquisition Time       | 3.9846              |
| 7 Acquisition Date       | 2022-04-21T21:18:26 |
| 8 Spectrometer Frequency | 399.93              |
| 9 Spectral Width         | 8223.7              |

7.548  
7.529  
7.488  
7.441  
7.349  
7.332  
7.293  
7.273  
7.132  
7.112

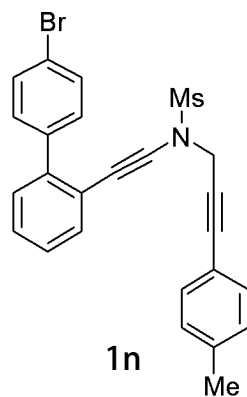

4.464

2.977

2.340

0.000

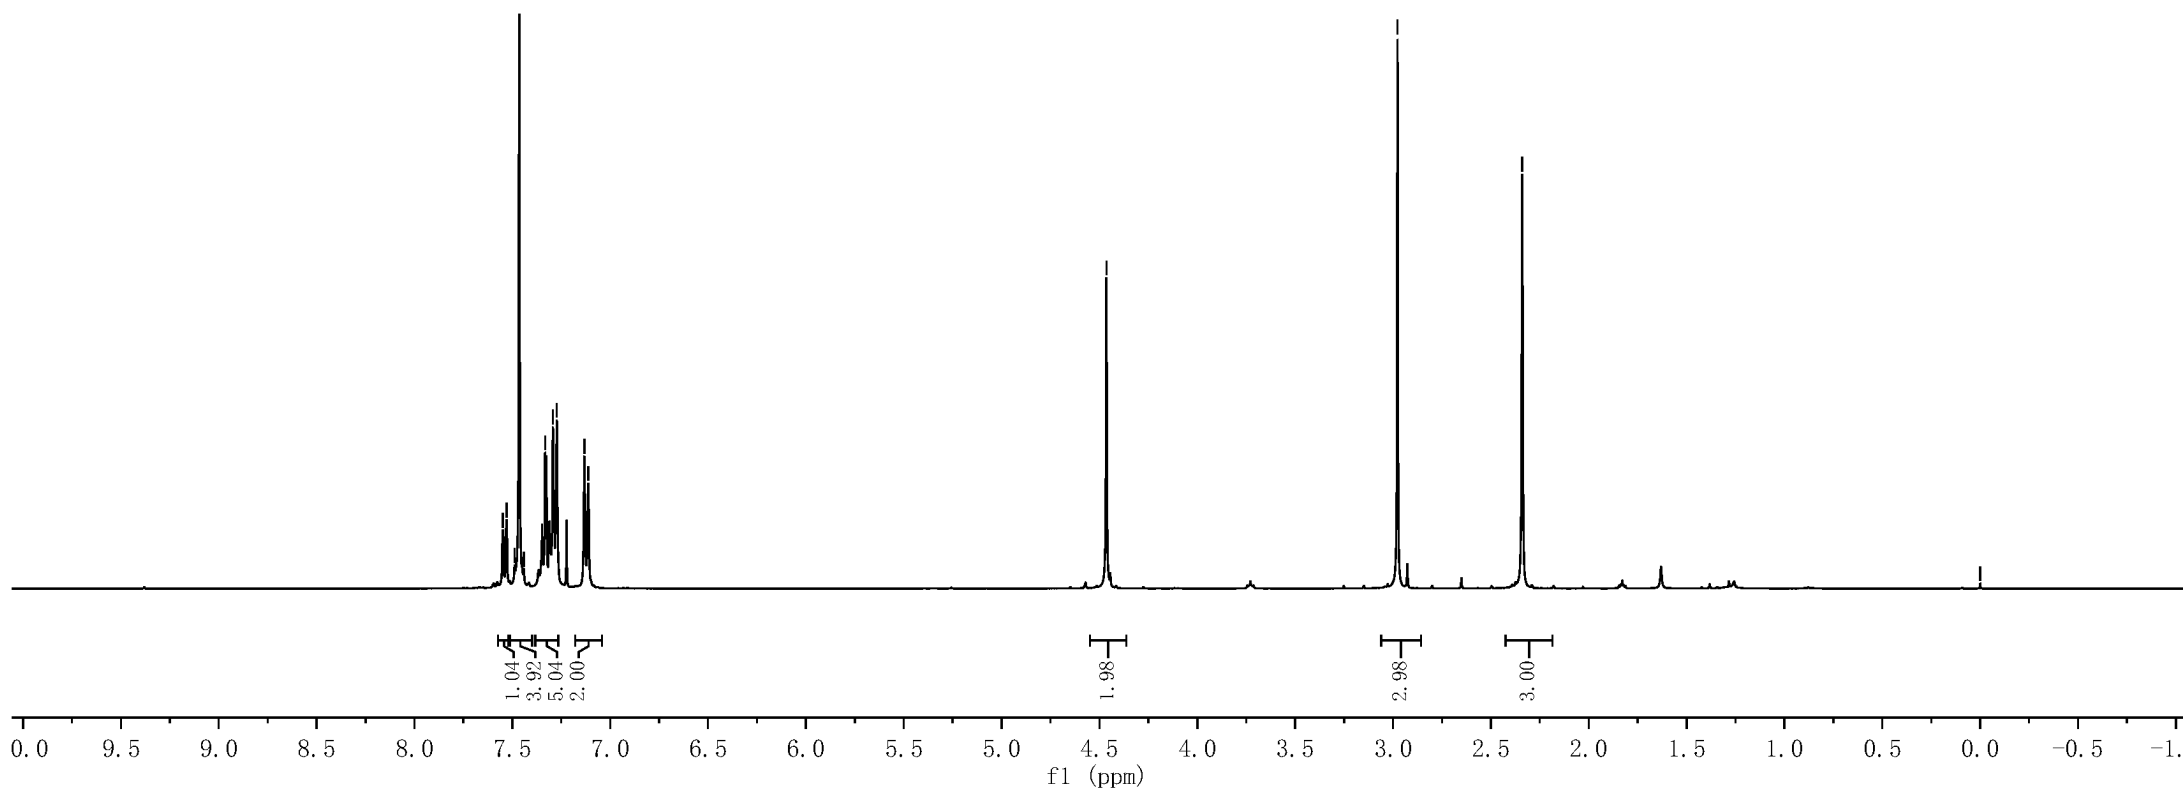

| Parameter                | Value               |
|--------------------------|---------------------|
| 1 Title                  | zyx-4-239-C         |
| 2 Origin                 | Bruker BioSpin GmbH |
| 3 Solvent                | CDCl3               |
| 4 Temperature            | 295.5               |
| 5 Number of Scans        | 26                  |
| 6 Acquisition Time       | 1.3631              |
| 7 Acquisition Date       | 2022-04-21T21:19:49 |
| 8 Spectrometer Frequency | 100.56              |
| 9 Spectral Width         | 24038.5             |

142.11  
139.31  
139.29  
131.61  
131.07  
130.85  
129.18  
127.85  
121.56  
120.50  
118.41

87.01  
84.37  
80.77  
77.32  
77.00  
76.68  
70.78

42.72  
38.44  
21.44

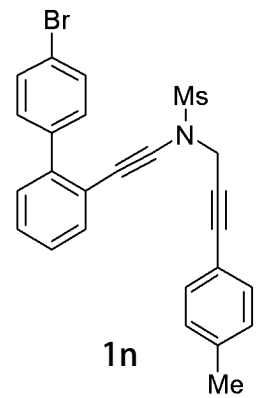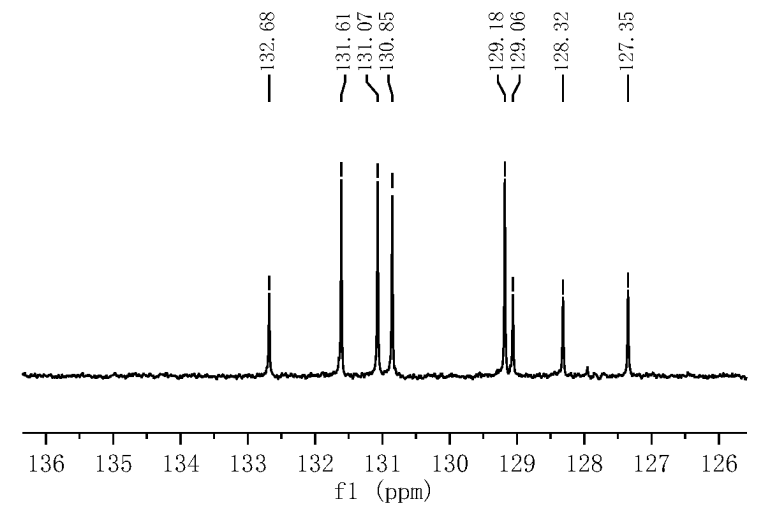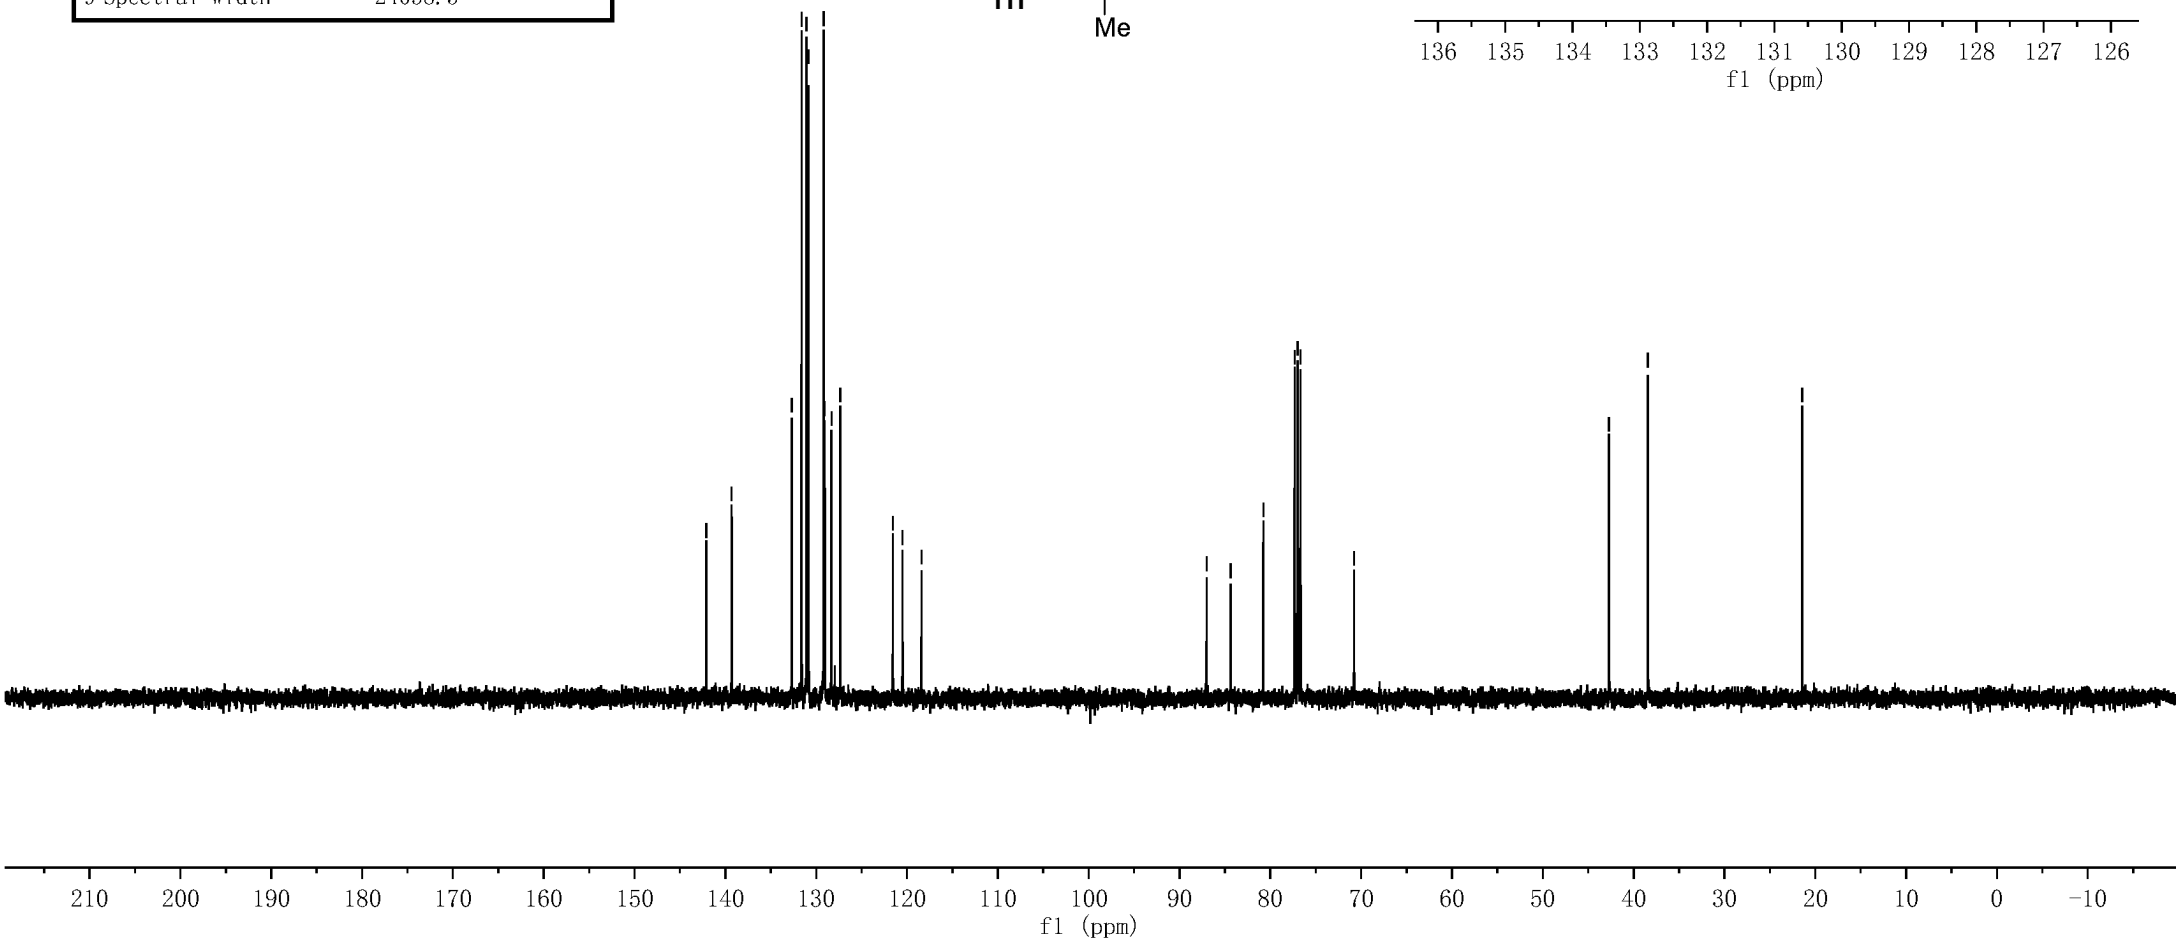

| Parameter                | Value               |
|--------------------------|---------------------|
| 1 Title                  | zyx-5-5-h           |
| 2 Origin                 | Bruker BioSpin GmbH |
| 3 Solvent                | CDCl3               |
| 4 Temperature            | 295.6               |
| 5 Number of Scans        | 13                  |
| 6 Acquisition Time       | 3.9846              |
| 7 Acquisition Date       | 2022-04-25T15:21:52 |
| 8 Spectrometer Frequency | 399.93              |
| 9 Spectral Width         | 8223.7              |

7.579  
7.562  
7.541  
7.481  
7.457  
7.436  
7.367  
7.338  
7.312

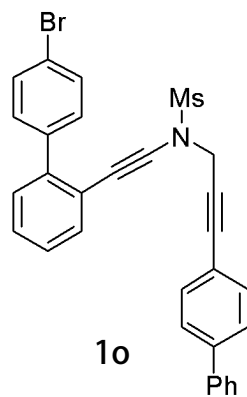

4.498

3.000

0.000

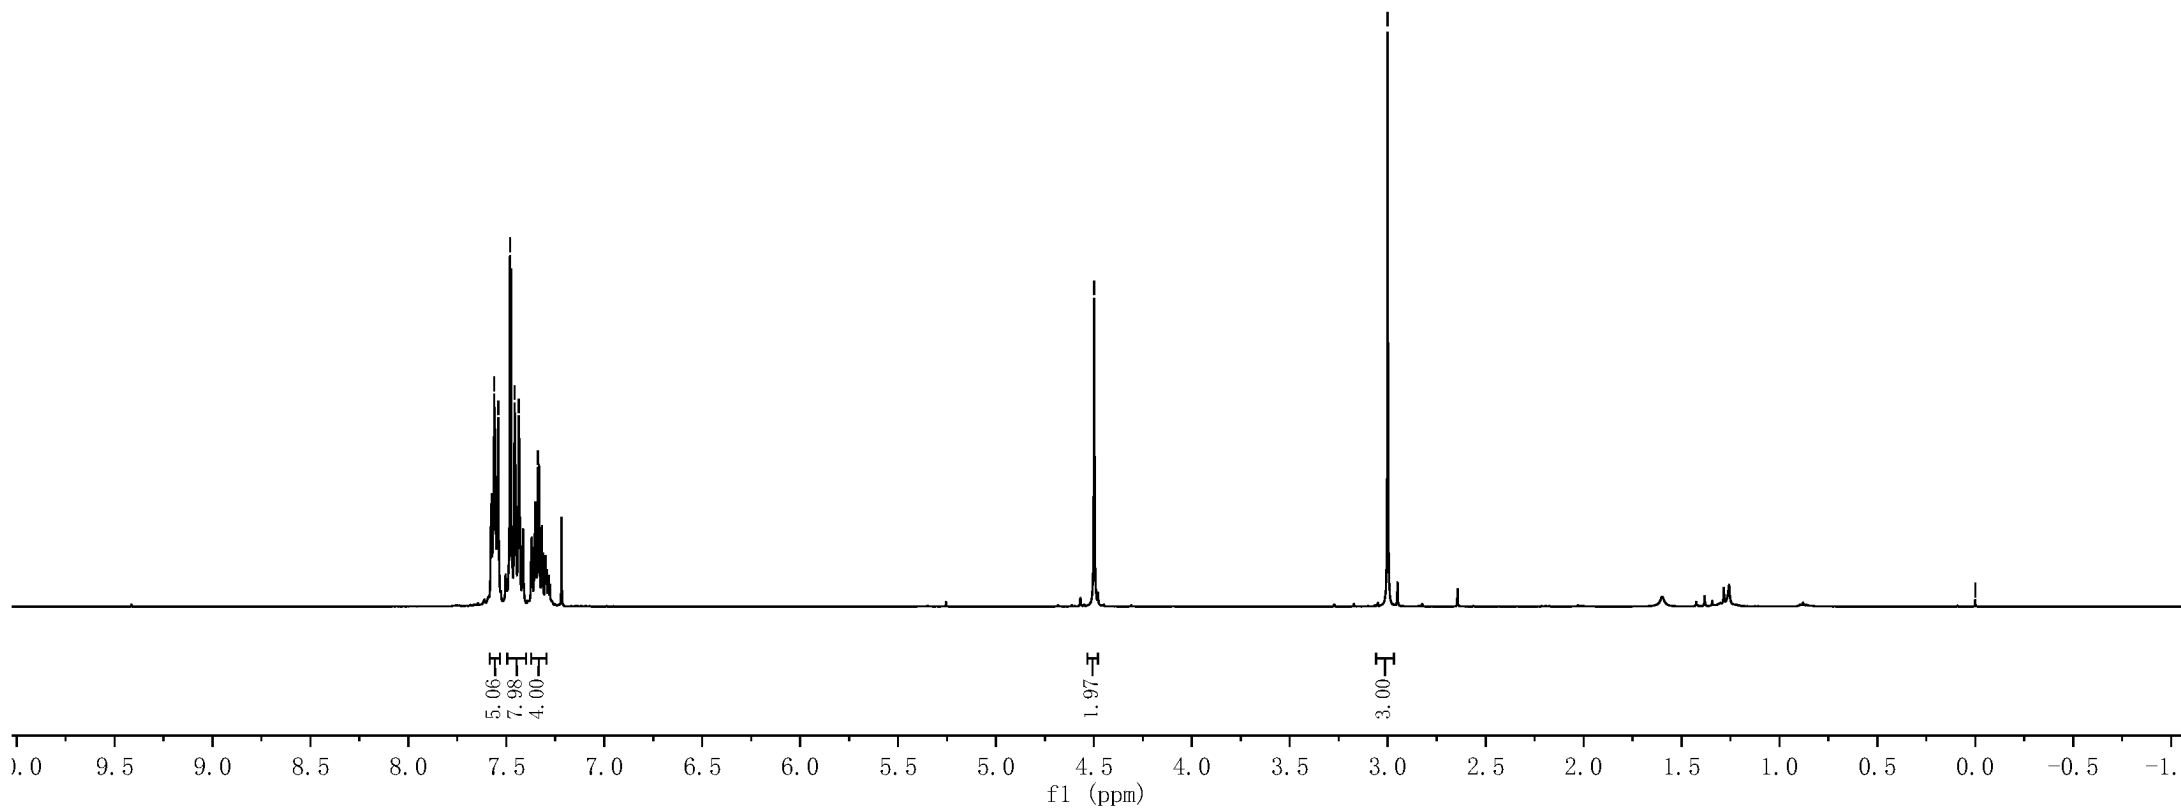



| Parameter                | Value               |
|--------------------------|---------------------|
| 1 Title                  | zyx-5-5-c           |
| 2 Origin                 | Bruker BioSpin GmbH |
| 3 Solvent                | CDCl3               |
| 4 Temperature            | 295.9               |
| 5 Number of Scans        | 56                  |
| 6 Acquisition Time       | 1.3631              |
| 7 Acquisition Date       | 2022-04-25T15:25:11 |
| 8 Spectrometer Frequency | 100.56              |
| 9 Spectral Width         | 24038.5             |

142.16  
141.83  
139.96  
139.33  
132.17  
128.85  
127.11  
126.85  
120.50  
120.33

86.75  
84.33  
82.07  
77.32  
77.00  
76.68  
70.90

42.72  
38.51

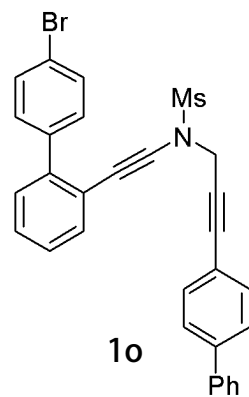

132.74  
132.17  
131.11  
130.88  
129.11  
128.85  
128.38  
127.80  
127.39  
127.11  
126.97

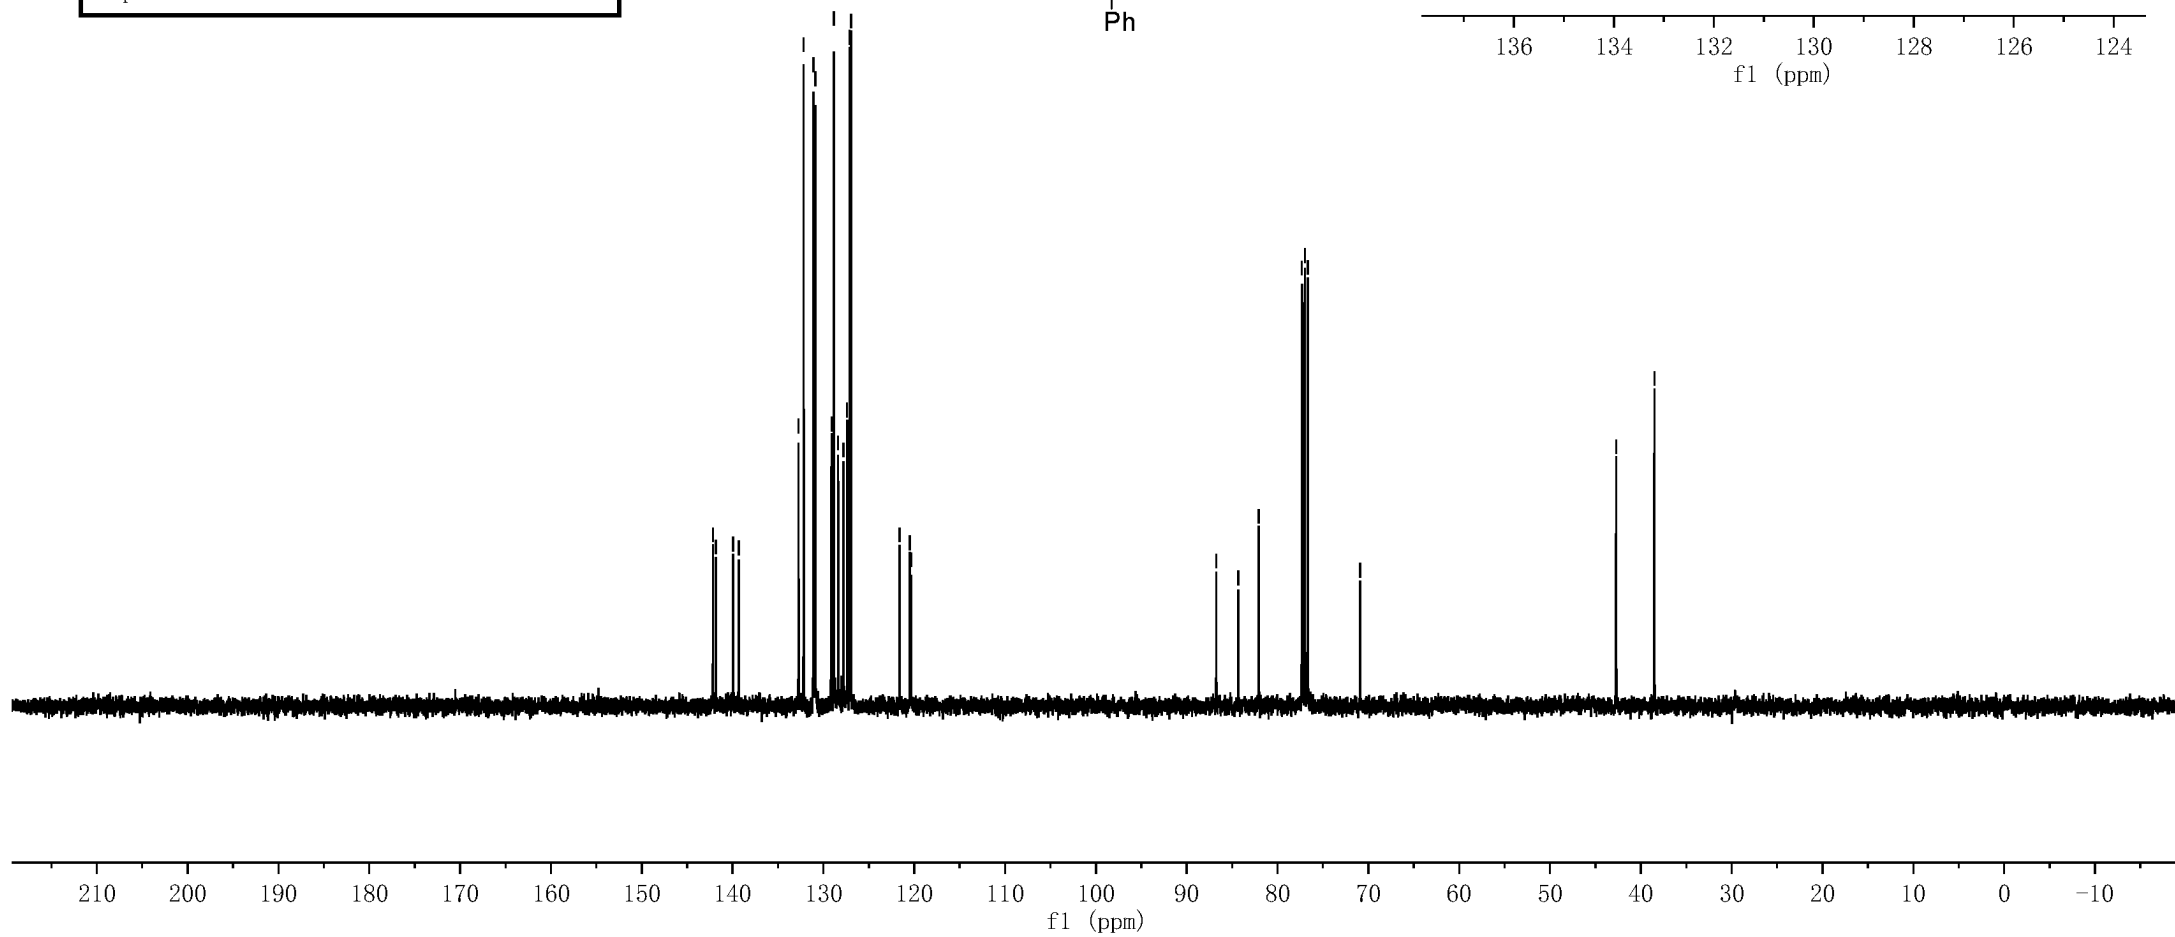

| Parameter                | Value               |
|--------------------------|---------------------|
| 1 Title                  | zyx-5-36-H          |
| 2 Origin                 | Bruker BioSpin GmbH |
| 3 Solvent                | CDCl3               |
| 4 Temperature            | 295.1               |
| 5 Number of Scans        | 11                  |
| 6 Acquisition Time       | 3.9846              |
| 7 Acquisition Date       | 2022-05-05T16:12:26 |
| 8 Spectrometer Frequency | 399.93              |
| 9 Spectral Width         | 8223.7              |

7.541  
7.522  
7.485  
7.463  
7.458  
7.435  
7.339  
7.319  
7.285  
7.264  
7.158  
7.137

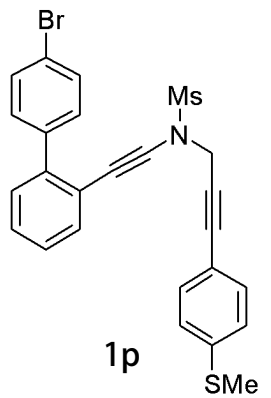

4.460

2.973

2.437

0.000

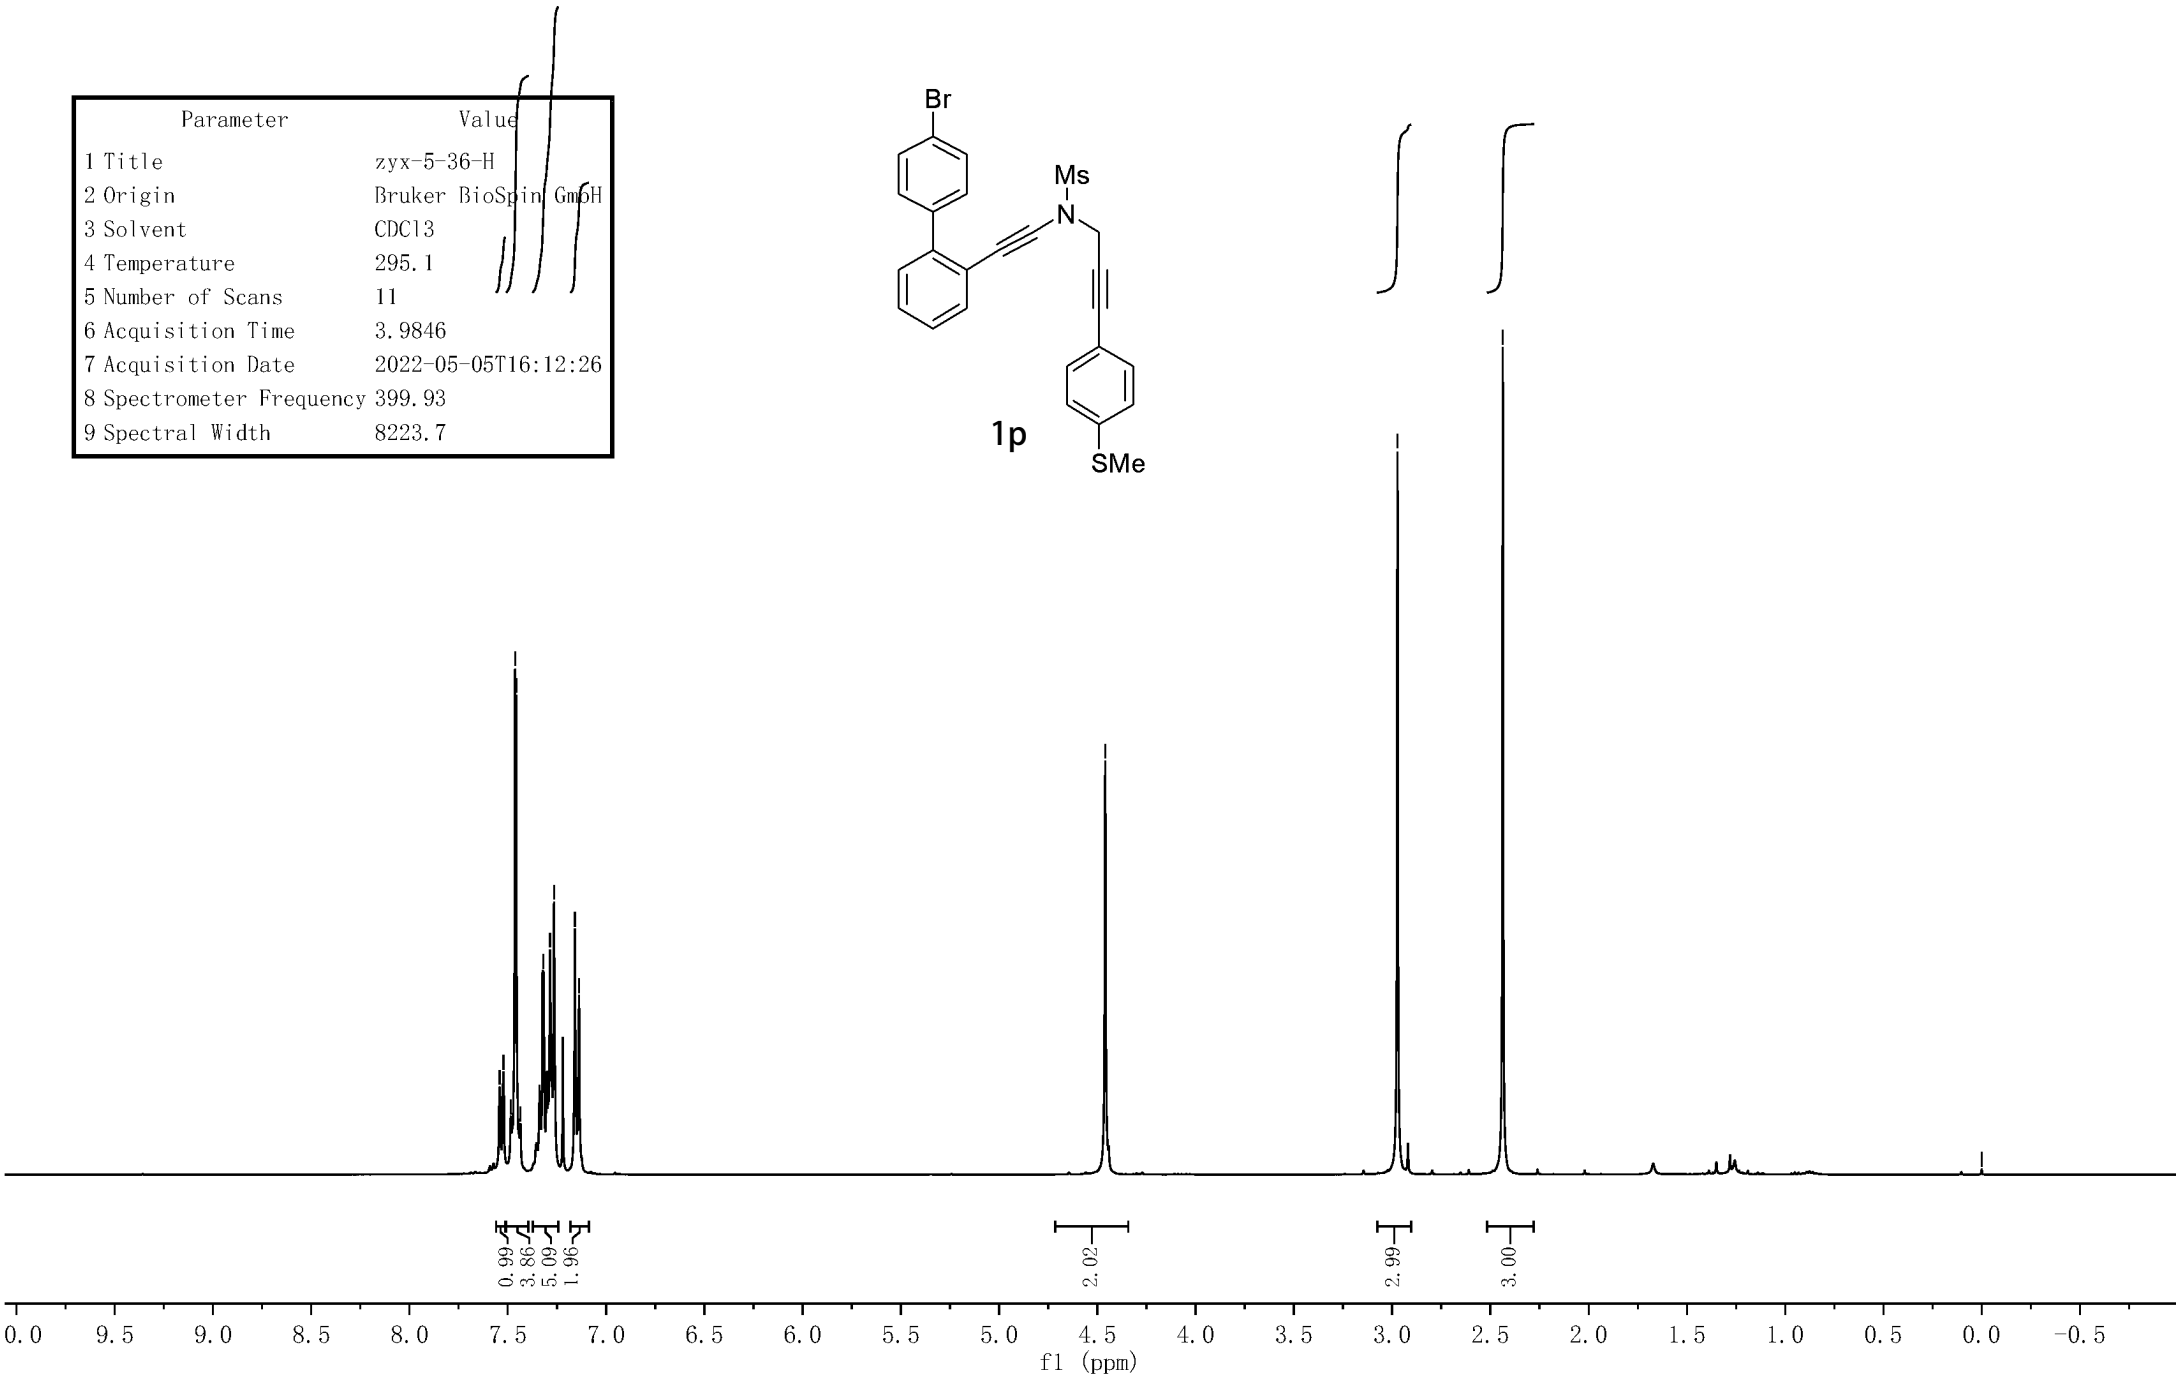

| Parameter                | Value               |
|--------------------------|---------------------|
| 1 Title                  | zyx-5-36-C          |
| 2 Origin                 | Bruker BioSpin GmbH |
| 3 Solvent                | CDC13               |
| 4 Temperature            | 295.5               |
| 5 Number of Scans        | 29                  |
| 6 Acquisition Time       | 1.3631              |
| 7 Acquisition Date       | 2022-05-05T16:14:28 |
| 8 Spectrometer Frequency | 100.56              |
| 9 Spectral Width         | 24038.5             |

141.96  
140.49  
139.17  
132.61  
131.87  
130.98  
130.76  
129.00  
128.28  
127.29  
125.56  
121.49  
120.35  
117.42

86.55  
84.26  
81.41  
77.32  
77.00  
76.68  
70.76

42.59  
38.37  
14.99

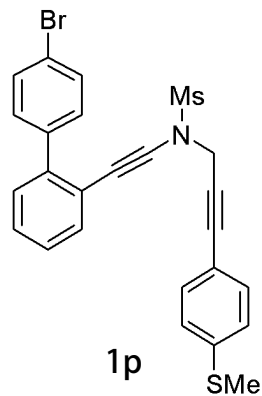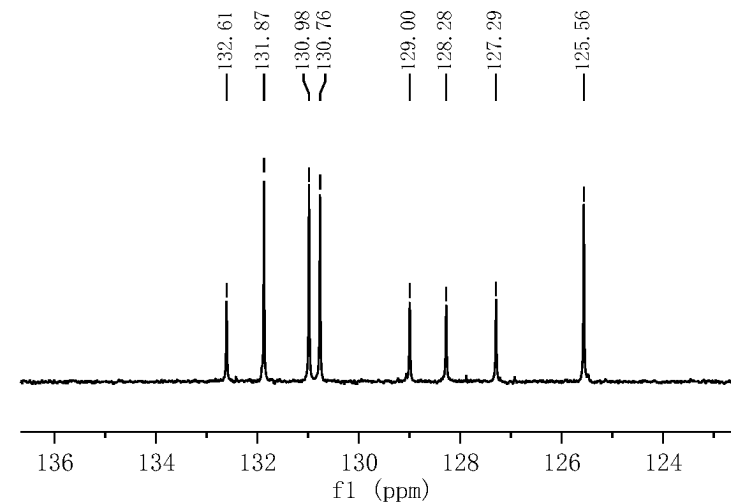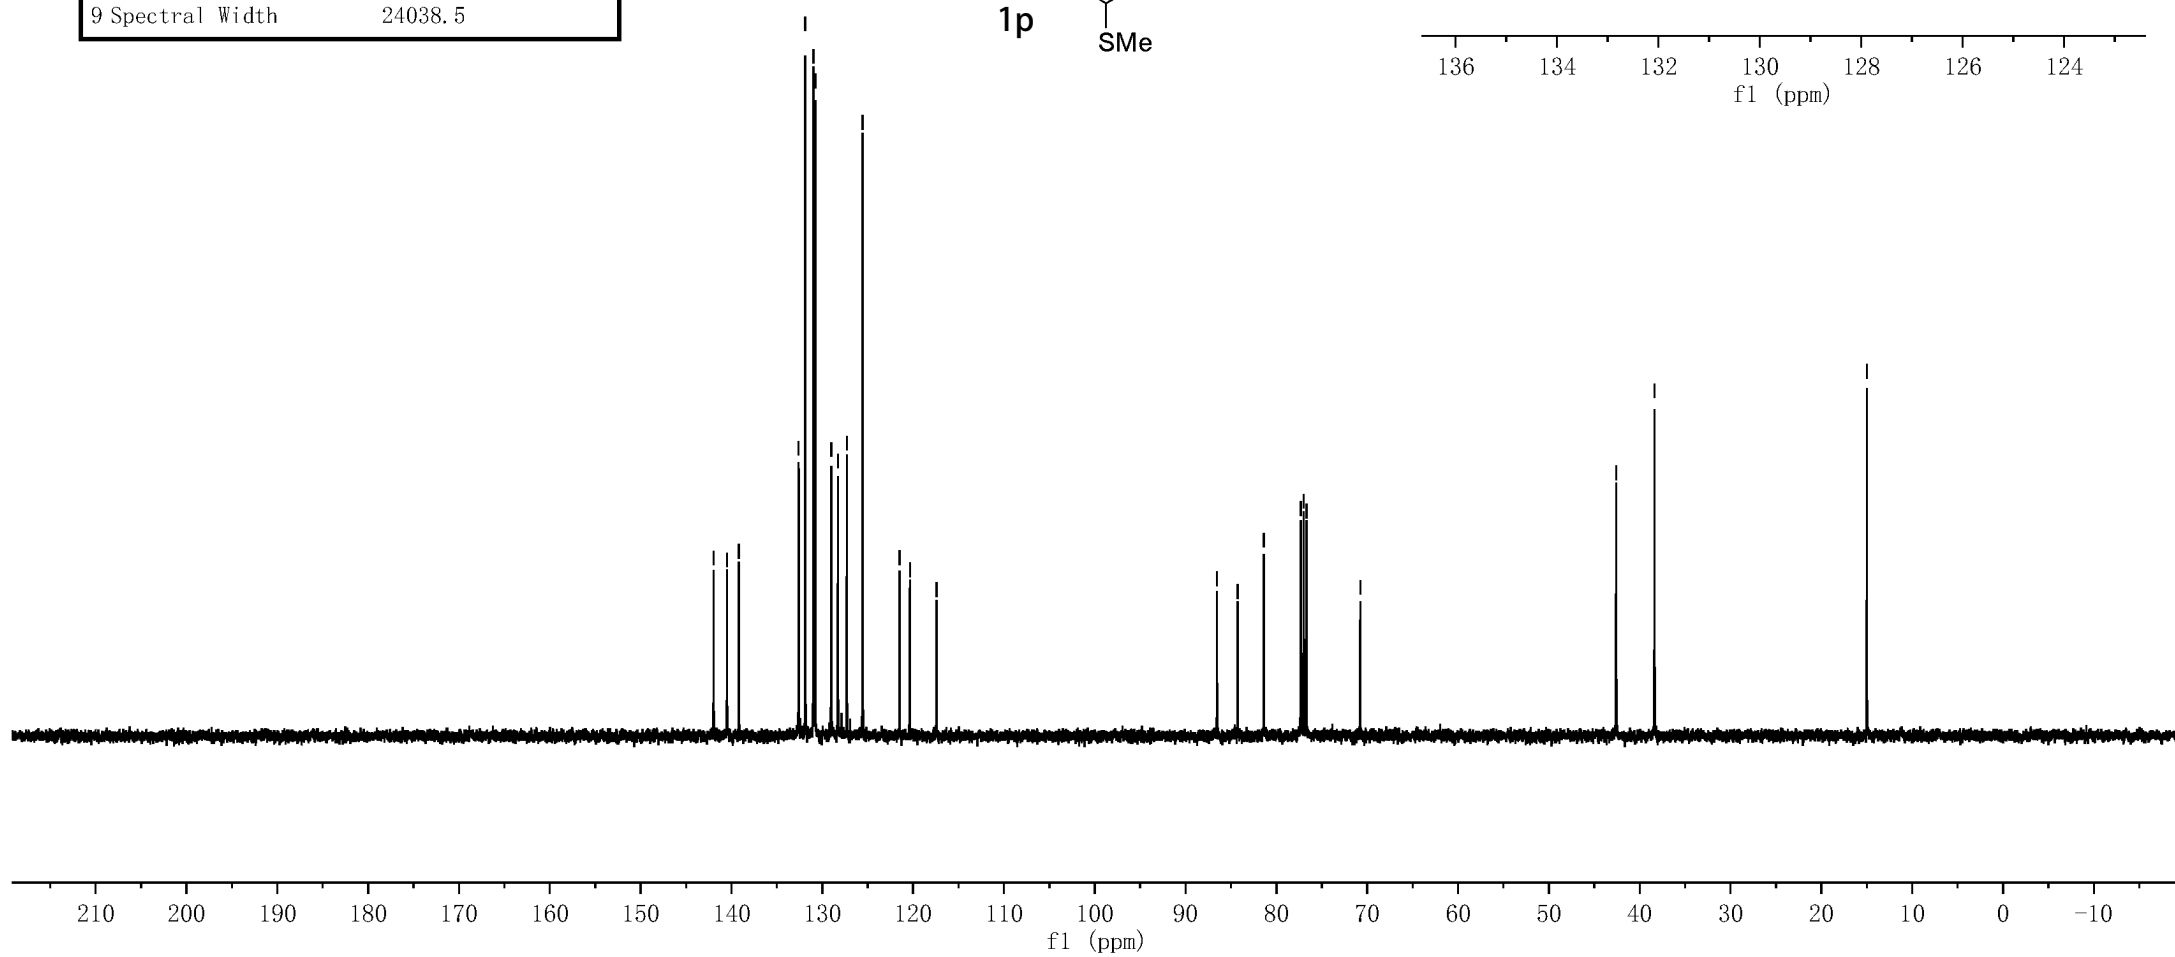

| Parameter                | Value               |
|--------------------------|---------------------|
| 1 Title                  | zyx-4-236-h         |
| 2 Origin                 | Bruker BioSpin GmbH |
| 3 Solvent                | CDCl3               |
| 4 Temperature            | 295.0               |
| 5 Number of Scans        | 20                  |
| 6 Acquisition Time       | 3.9846              |
| 7 Acquisition Date       | 2022-04-20T15:17:37 |
| 8 Spectrometer Frequency | 399.93              |
| 9 Spectral Width         | 8223.7              |

7.548  
7.529  
7.491  
7.476  
7.469  
7.454  
7.359  
7.335  
7.316  
7.294  
6.918  
6.898  
6.803  
6.800  
6.756  
6.736

5.959

4.452

2.973

0.000

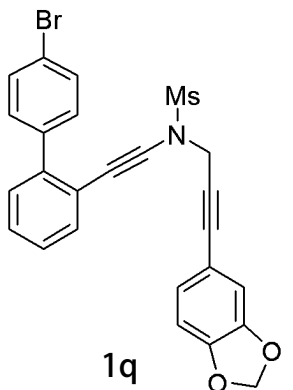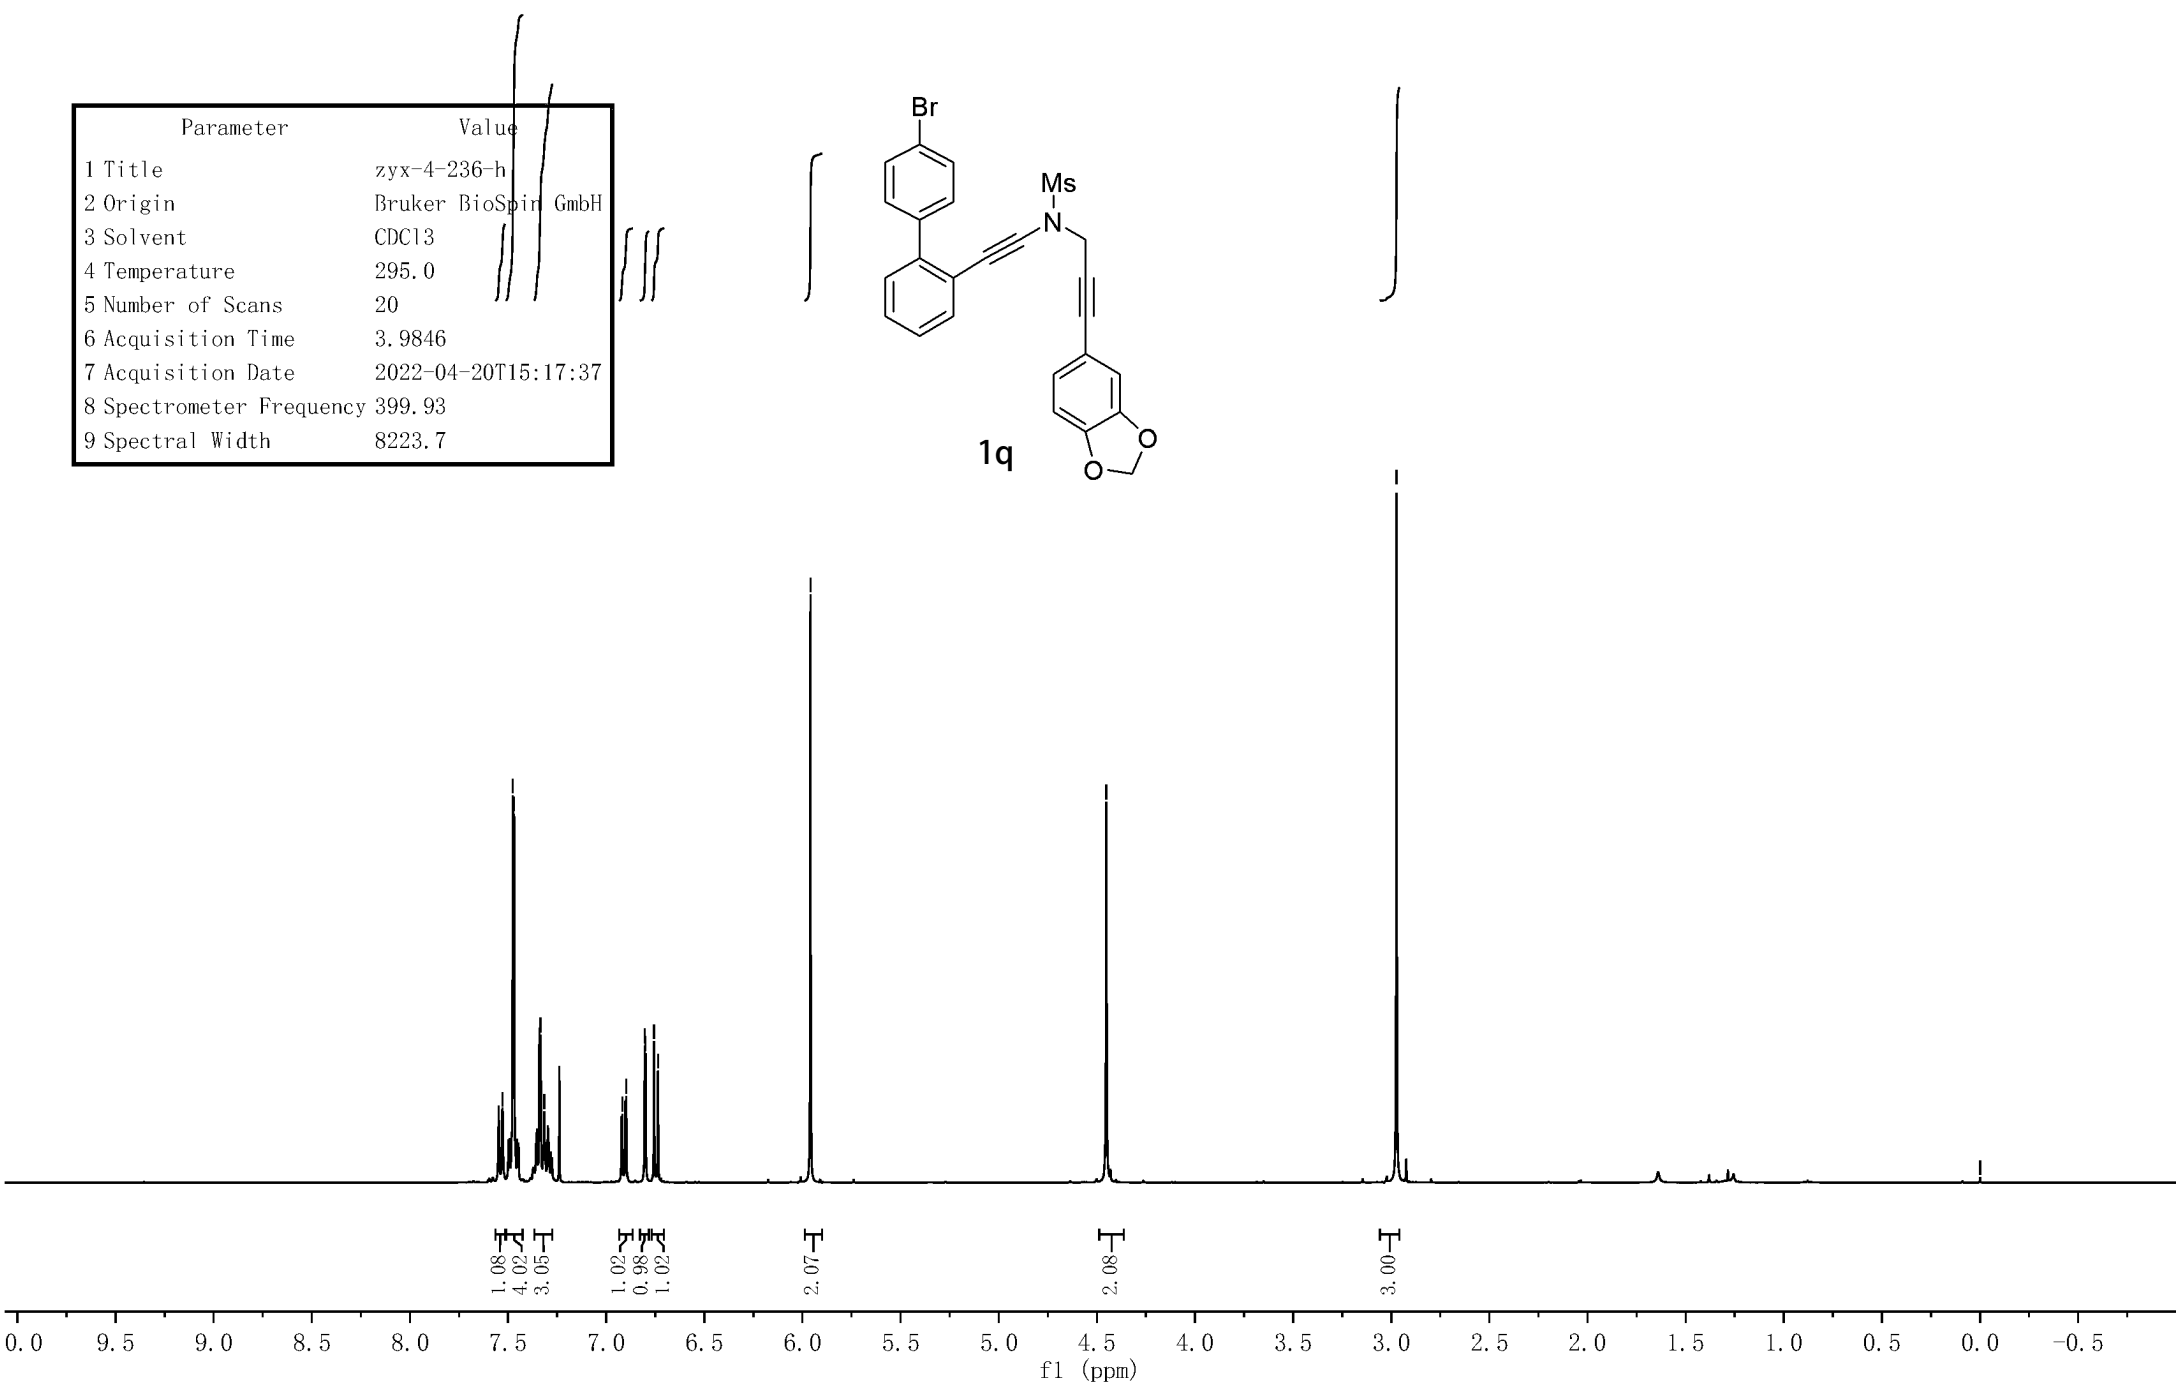

| Parameter                | Value               |
|--------------------------|---------------------|
| 1 Title                  | zyx-4-236-c         |
| 2 Origin                 | Bruker BioSpin GmbH |
| 3 Solvent                | CDCl3               |
| 4 Temperature            | 295.4               |
| 5 Number of Scans        | 116                 |
| 6 Acquisition Time       | 1.3631              |
| 7 Acquisition Date       | 2022-04-20T15:21:27 |
| 8 Spectrometer Frequency | 100.56              |
| 9 Spectral Width         | 24038.5             |

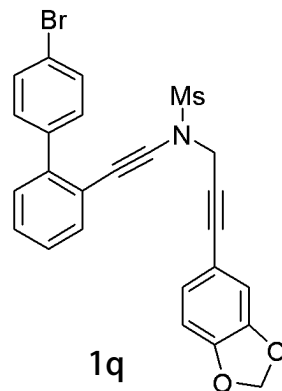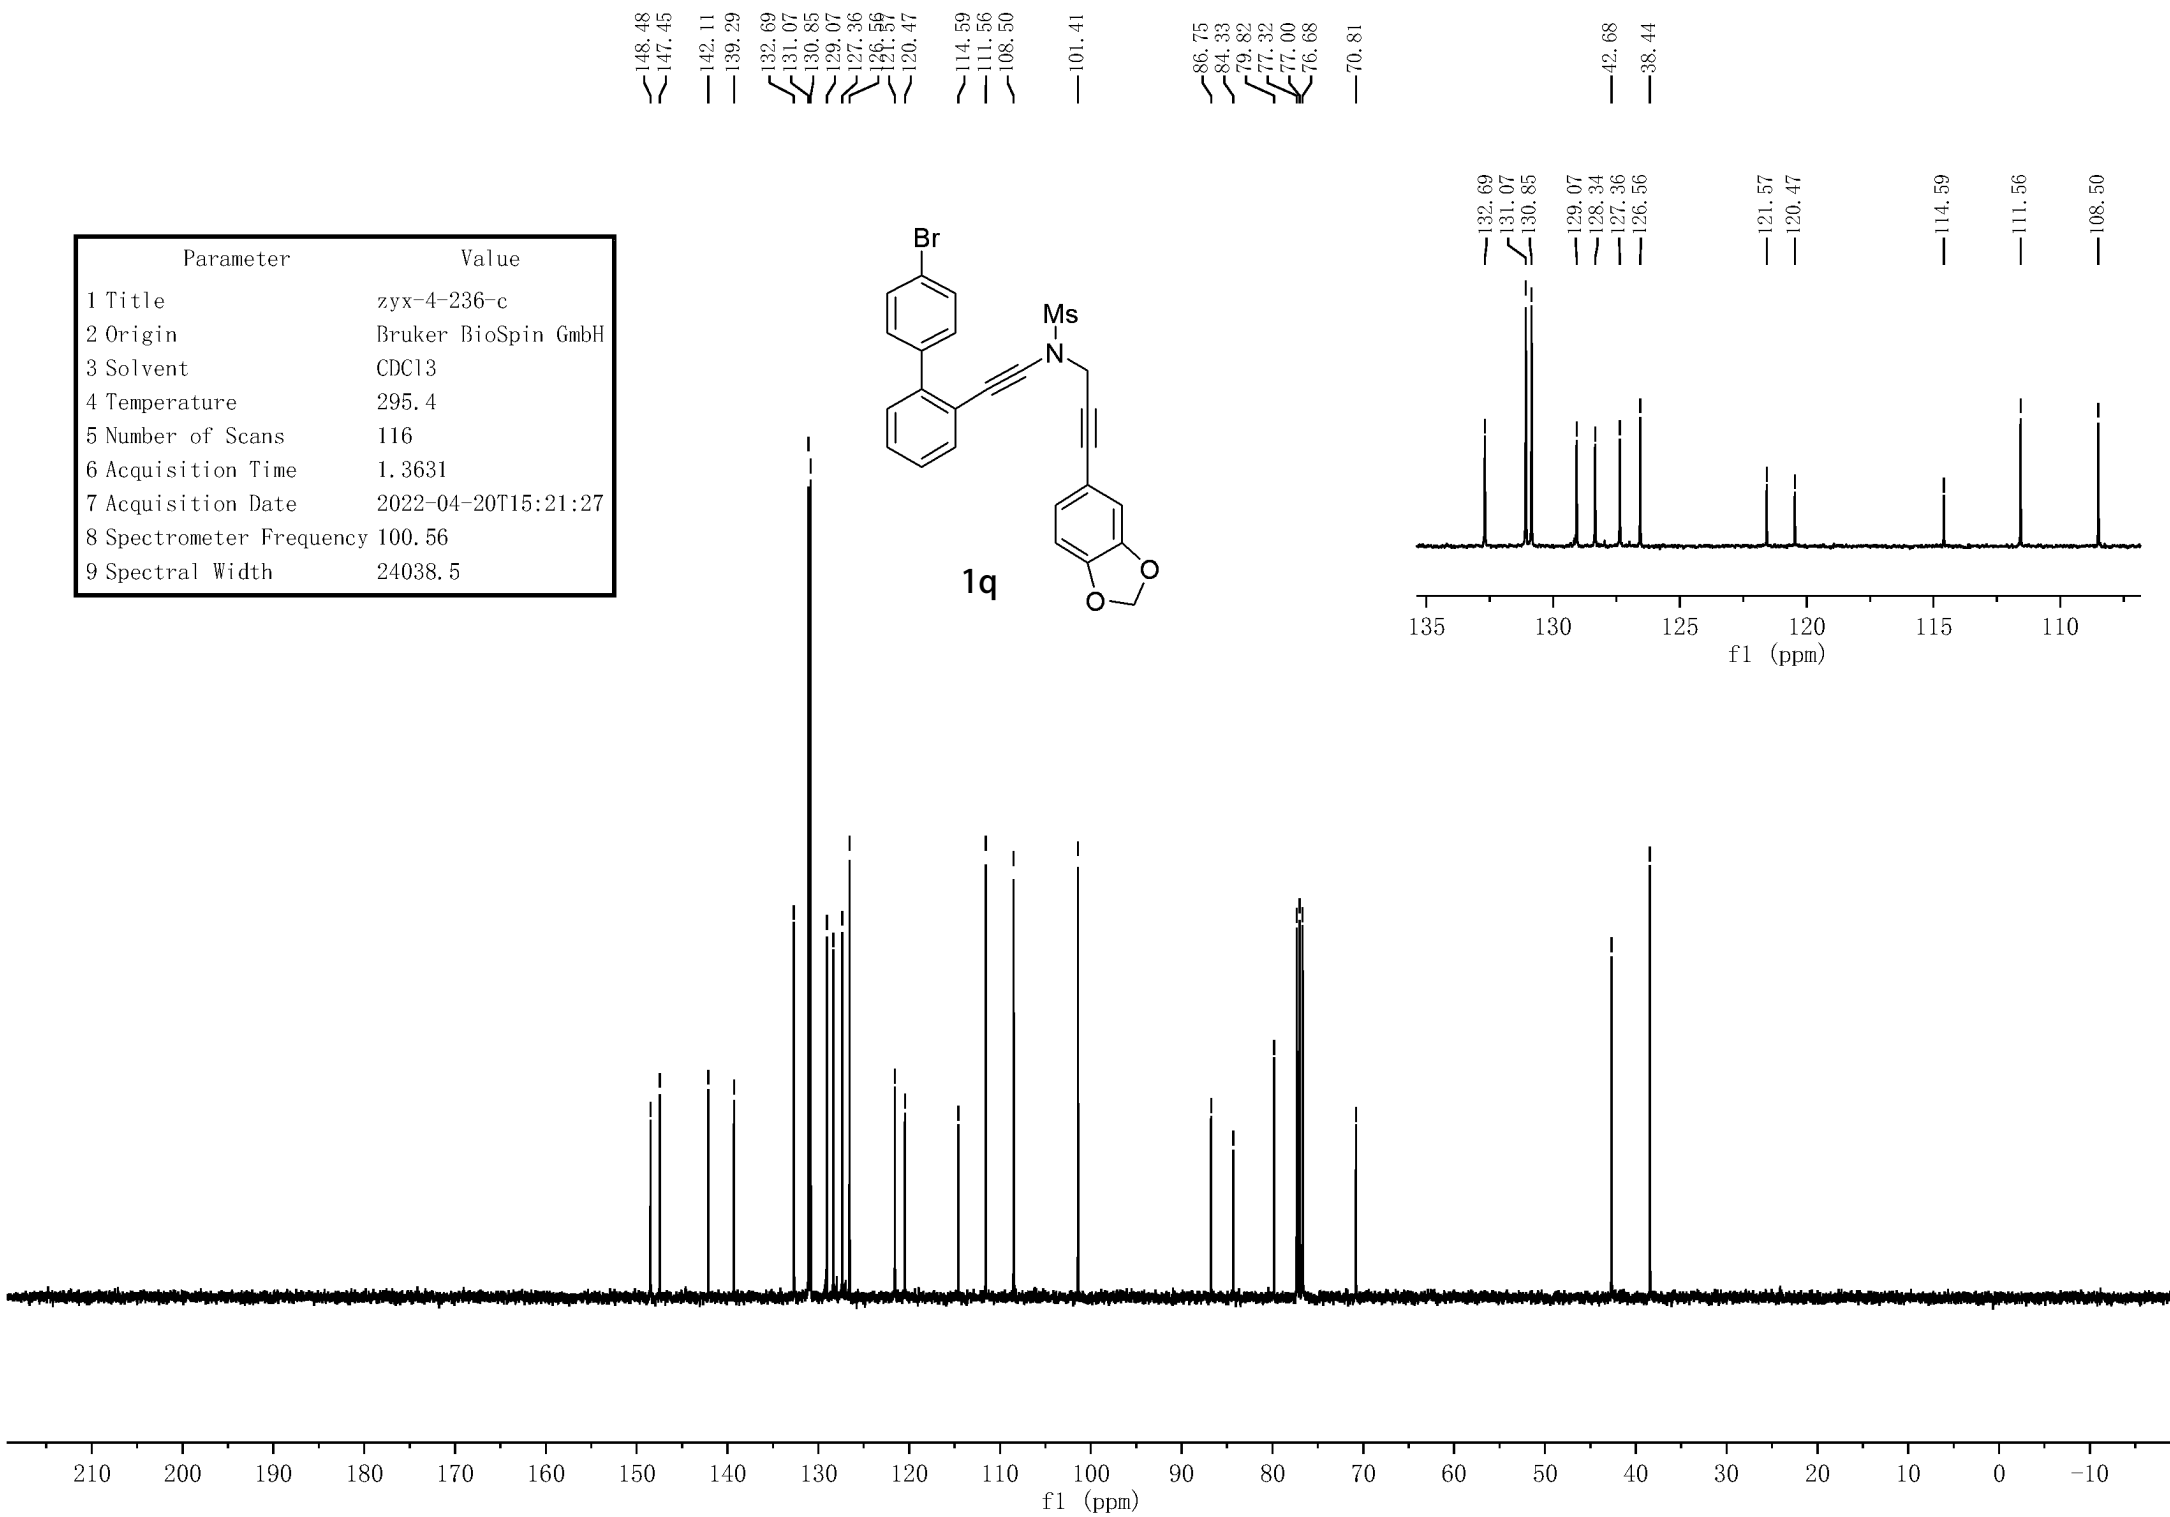

| Parameter                | Value               |
|--------------------------|---------------------|
| 1 Title                  | zyx-5-24-h          |
| 2 Origin                 | Bruker BioSpin GmbH |
| 3 Solvent                | CDCl3               |
| 4 Temperature            | 295.4               |
| 5 Number of Scans        | 7                   |
| 6 Acquisition Time       | 3.9846              |
| 7 Acquisition Date       | 2022-04-29T16:34:54 |
| 8 Spectrometer Frequency | 399.93              |
| 9 Spectral Width         | 8223.7              |

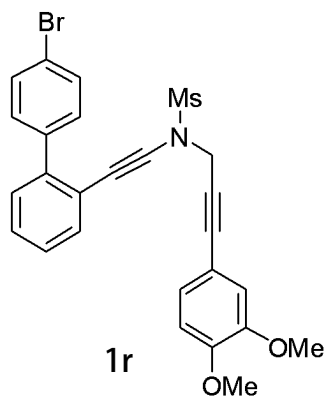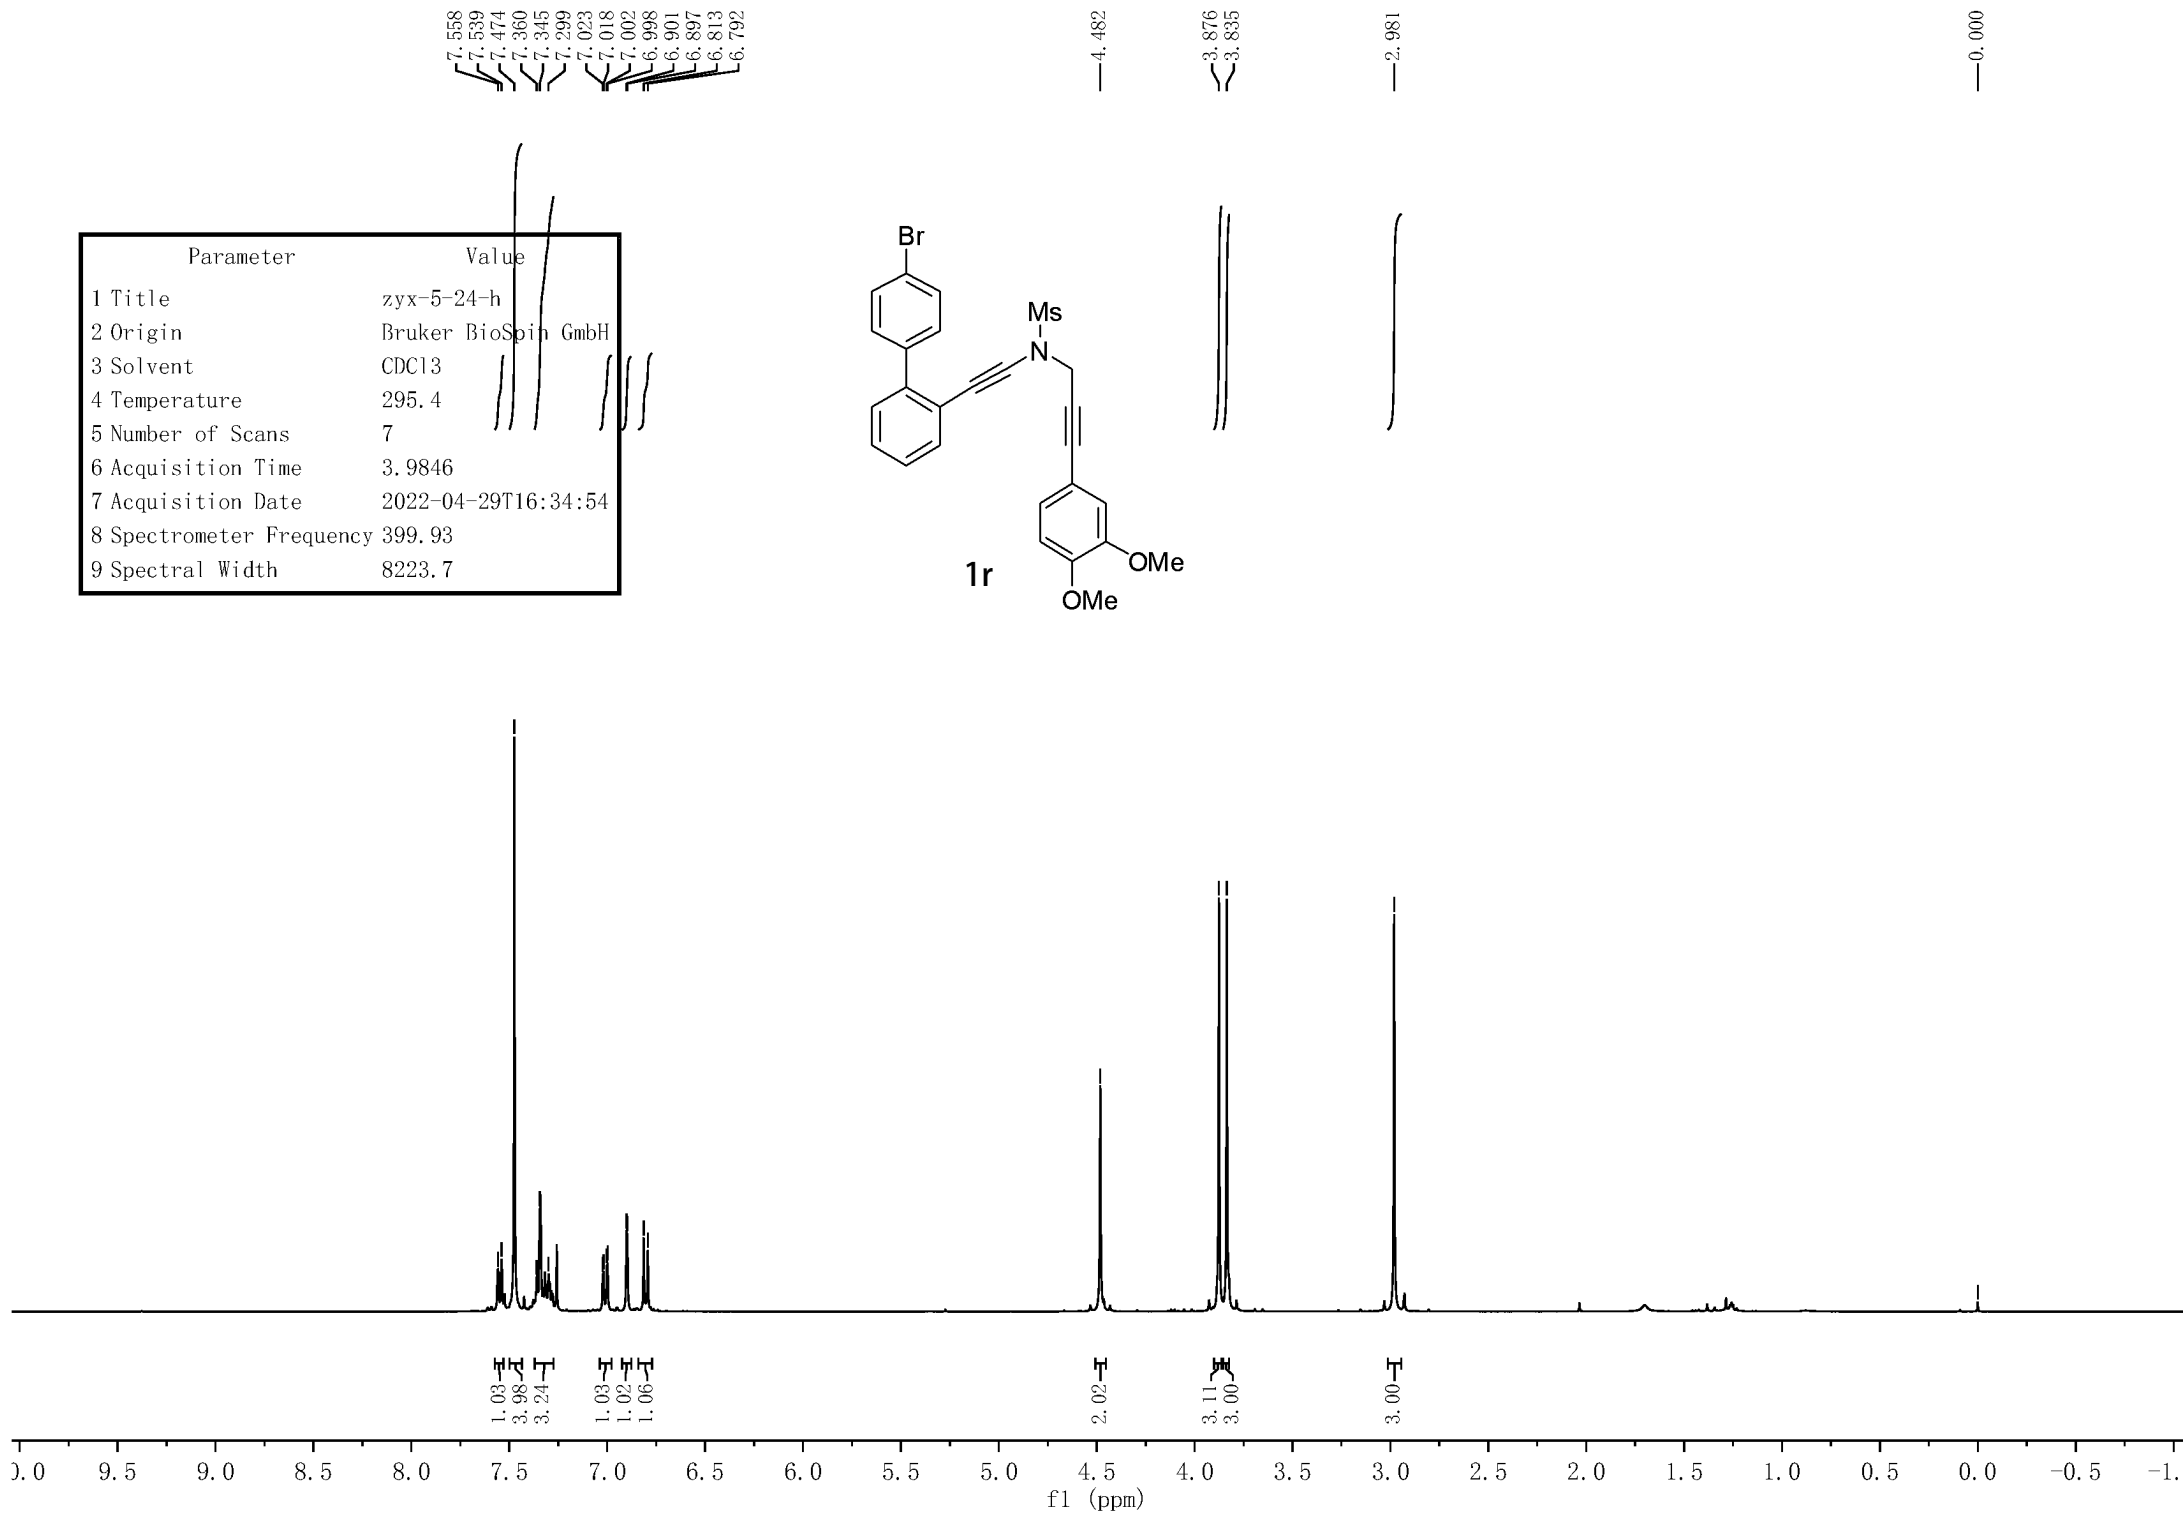

| Parameter                | Value               |
|--------------------------|---------------------|
| 1 Title                  | zyx-5-24-C          |
| 2 Origin                 | Bruker BioSpin GmbH |
| 3 Solvent                | CDCl3               |
| 4 Temperature            | 295.6               |
| 5 Number of Scans        | 29                  |
| 6 Acquisition Time       | 1.3631              |
| 7 Acquisition Date       | 2022-04-29T16:37:30 |
| 8 Spectrometer Frequency | 100.56              |
| 9 Spectral Width         | 24038.5             |

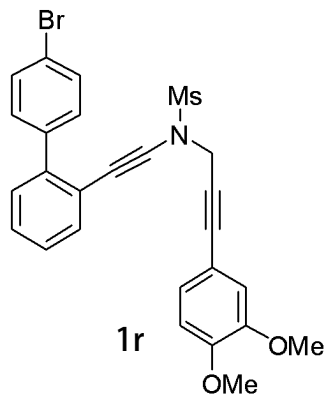

150.01  
148.59  
142.05  
139.23  
132.61  
131.04  
130.81  
129.04  
128.30  
127.32  
125.23  
121.52  
120.47  
114.22  
113.55  
110.95

86.95  
84.39  
79.95  
77.32  
77.00  
76.68  
70.81

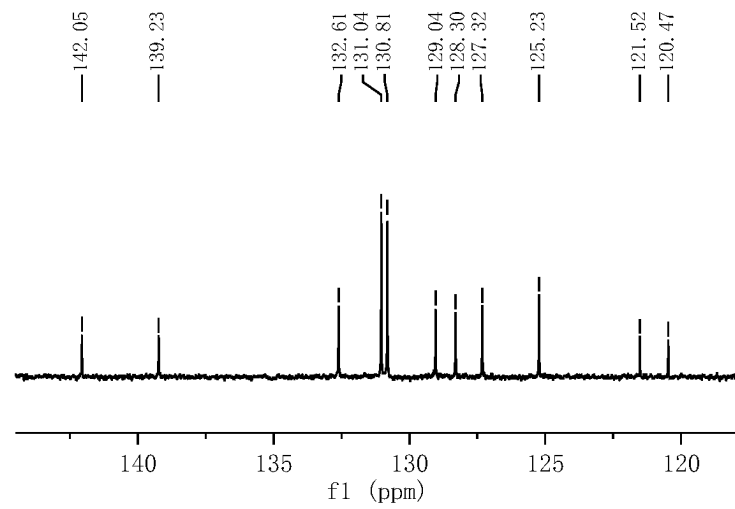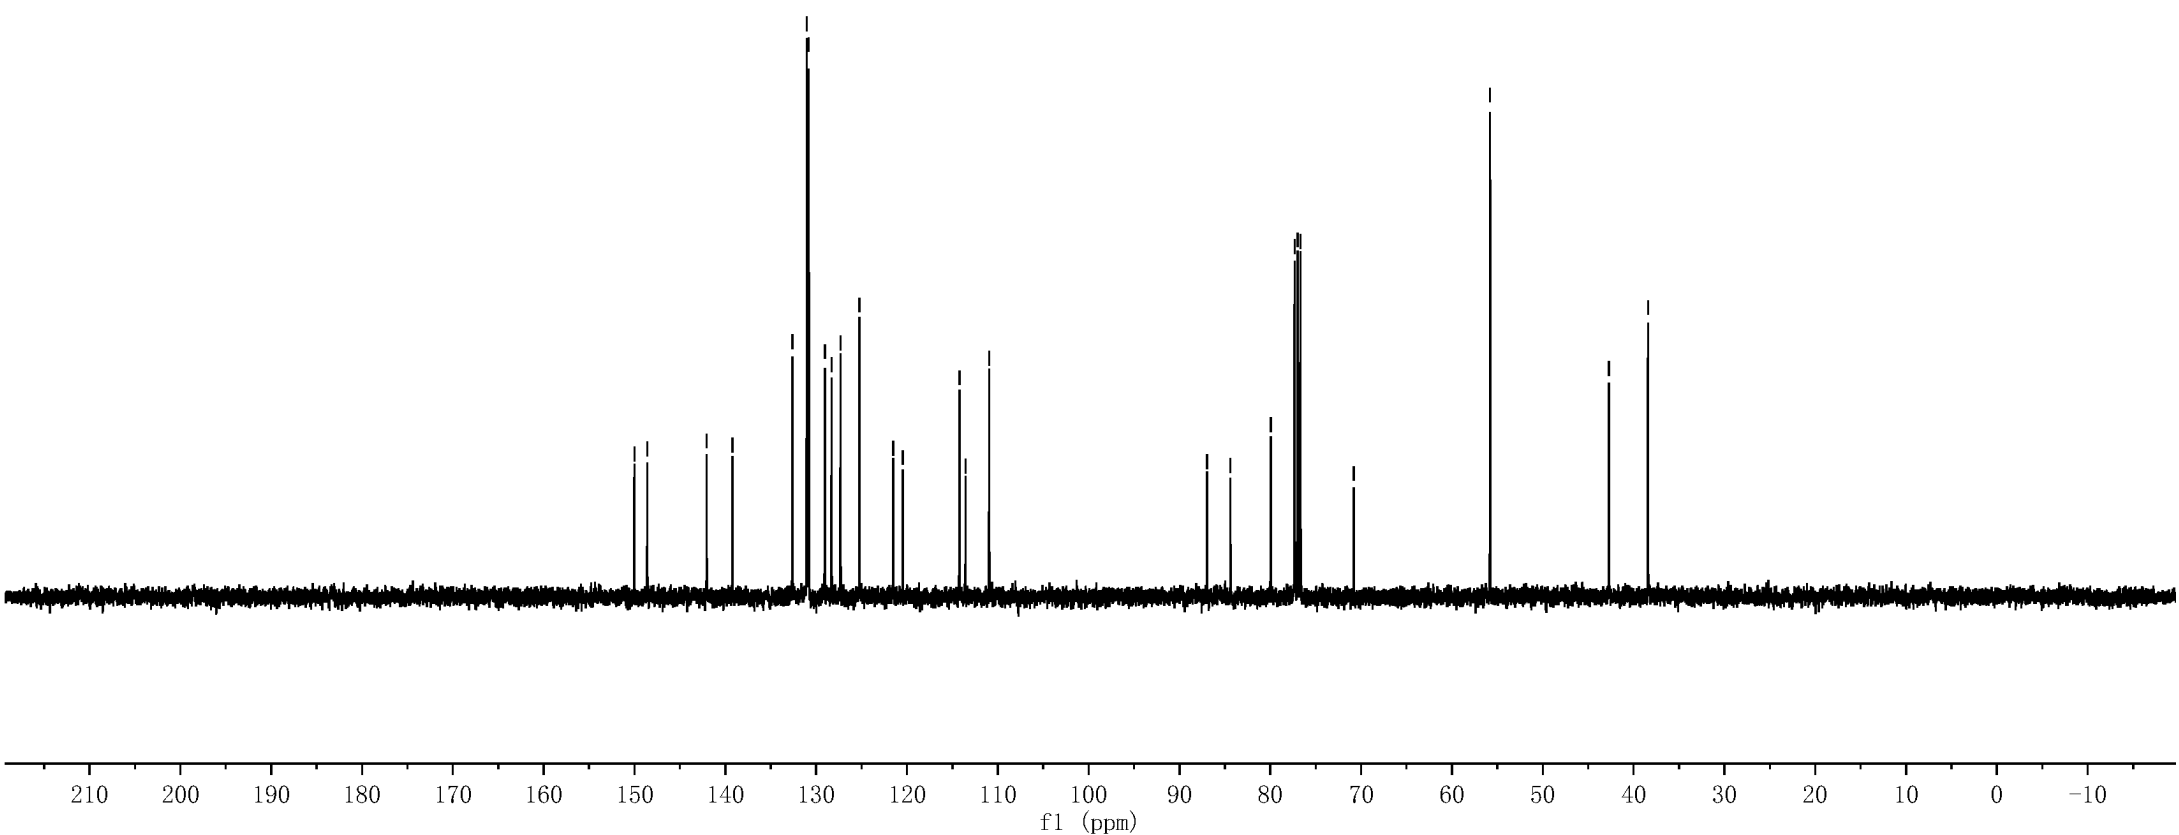

7.545  
7.530  
7.490  
7.472  
7.458  
7.441  
7.349  
7.333  
7.304  
7.278  
7.220  
7.218  
7.213  
7.211  
6.984  
6.976  
6.974  
6.966

4.484

2.954

0.000

| Parameter                | Value               |
|--------------------------|---------------------|
| 1 Title                  | zyx-5-19-h          |
| 2 Origin                 | Bruker BioSpin GmbH |
| 3 Solvent                | CDCl3               |
| 4 Temperature            | 298.2               |
| 5 Number of Scans        | 13                  |
| 6 Acquisition Time       | 3.1719              |
| 7 Acquisition Date       | 2022-04-27T22:06:06 |
| 8 Spectrometer Frequency | 500.17              |
| 9 Spectral Width         | 10330.6             |

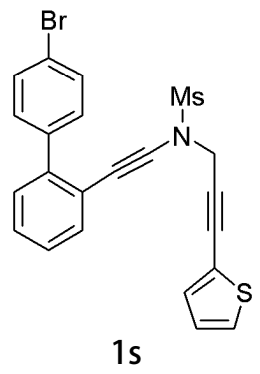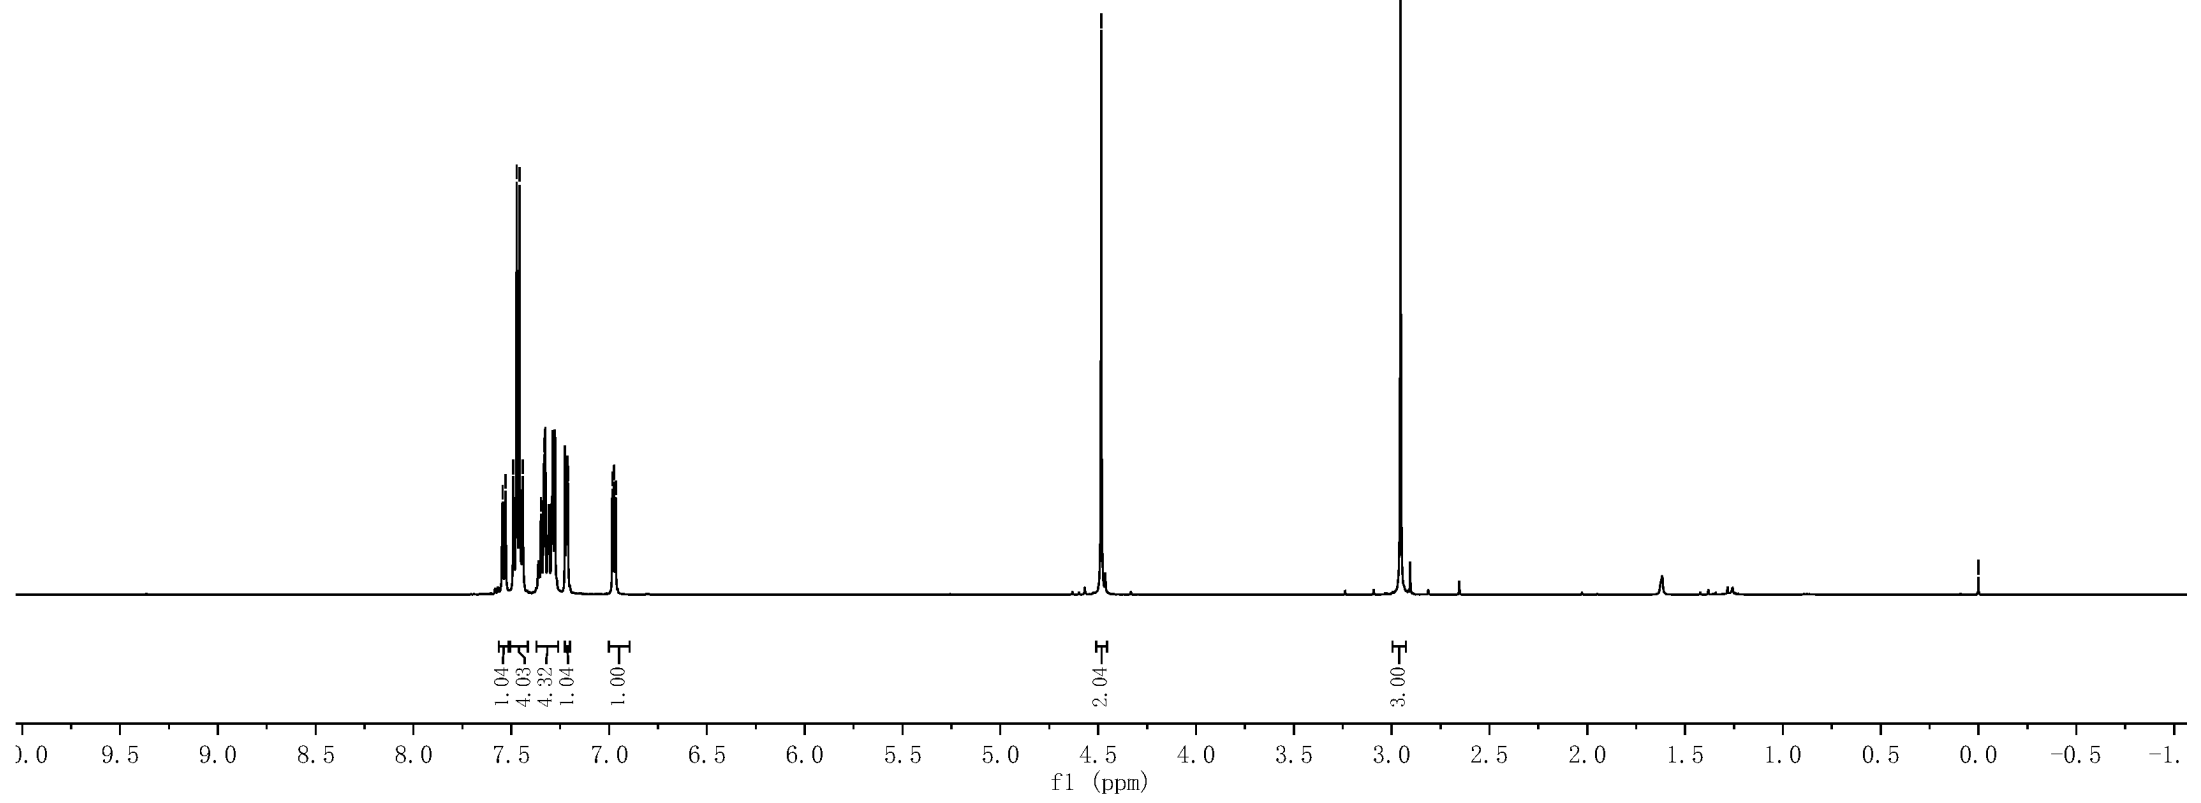



| Parameter                | Value               |
|--------------------------|---------------------|
| 1 Title                  | zyx-5-19-c          |
| 2 Origin                 | Bruker BioSpin GmbH |
| 3 Solvent                | CDCl3               |
| 4 Temperature            | 298.5               |
| 5 Number of Scans        | 24                  |
| 6 Acquisition Time       | 1.1010              |
| 7 Acquisition Date       | 2022-04-27T22:07:43 |
| 8 Spectrometer Frequency | 125.77              |
| 9 Spectral Width         | 29761.9             |

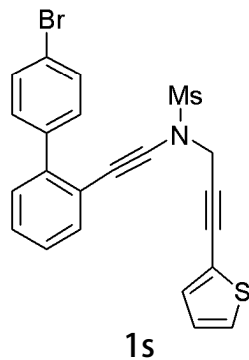

142.18  
139.28  
133.05  
132.68  
131.07  
130.85  
127.58  
121.23  
120.41

85.49  
84.18  
80.19  
77.25  
77.00  
76.75  
70.97

42.75  
38.43

133.05  
132.68  
131.07  
130.85  
129.05  
128.37  
128.10  
127.35  
127.11

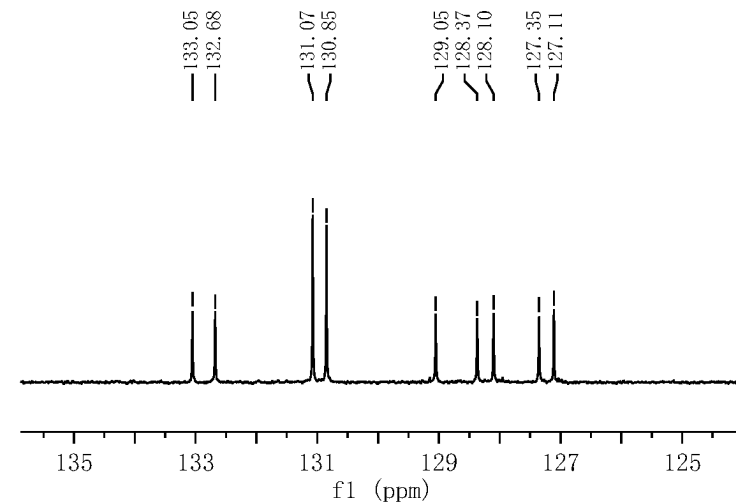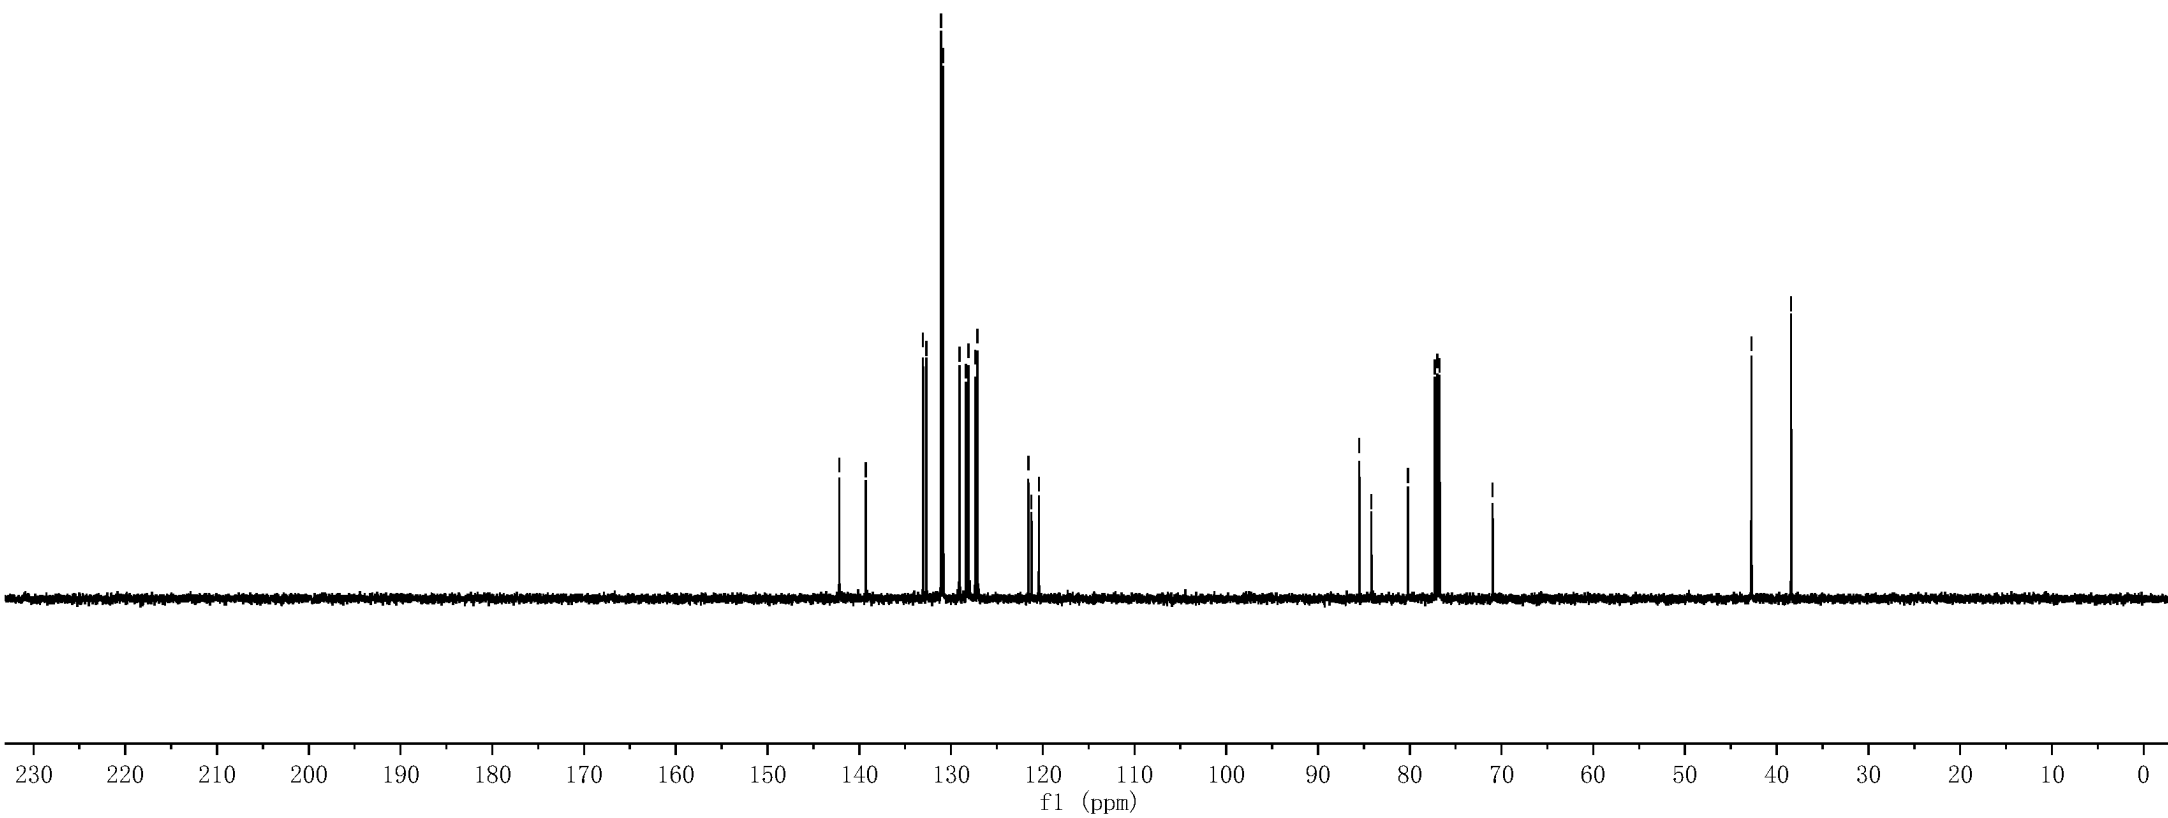

| Parameter                | Value               |
|--------------------------|---------------------|
| 1 Title                  | ZYX-5-67            |
| 2 Origin                 |                     |
| 3 Solvent                | CDC13               |
| 4 Temperature            | 299.6               |
| 5 Number of Scans        | 16                  |
| 6 Acquisition Time       | 4.0002              |
| 7 Acquisition Date       | 2022-05-20T18:13:23 |
| 8 Spectrometer Frequency | 399.92              |
| 9 Spectral Width         | 8012.0              |

7.534  
7.513  
7.463  
7.441  
7.276  
7.254  
7.236  
7.053  
7.024  
7.002  
6.981  
6.618  
6.597

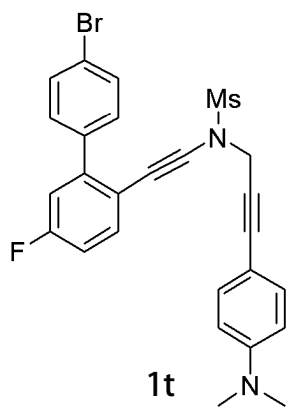

4.465

2.978  
2.964

0.000

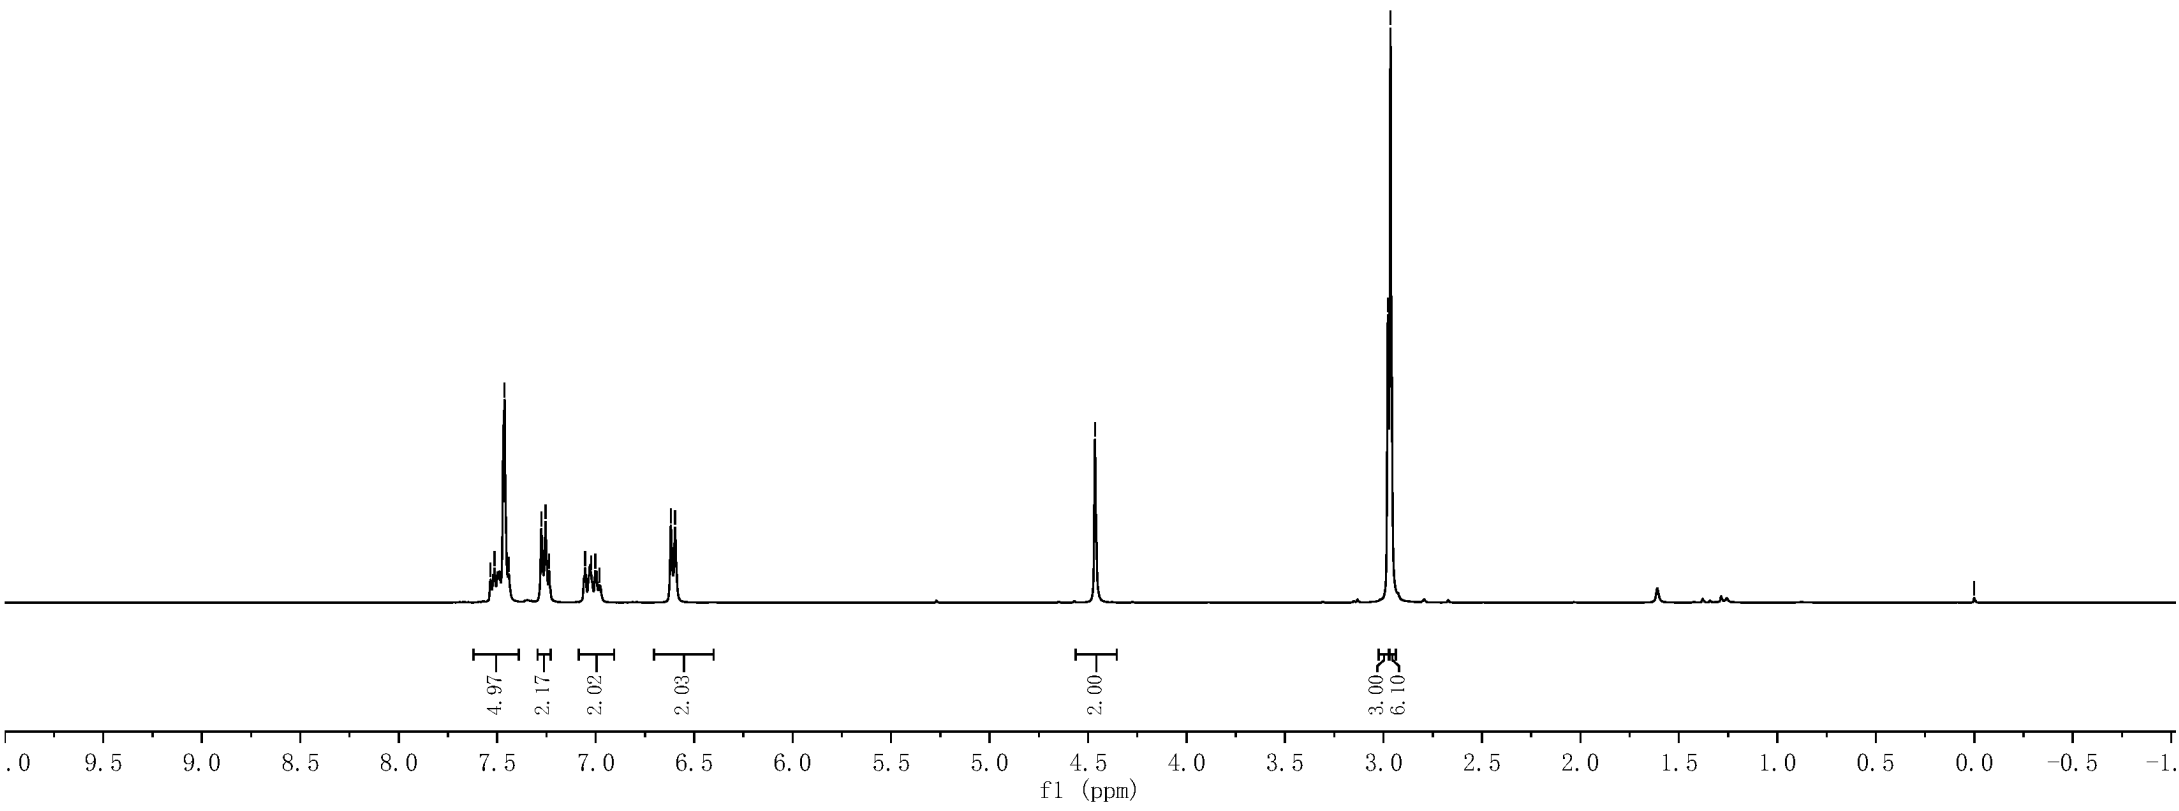

| Parameter                | Value               |
|--------------------------|---------------------|
| 1 Title                  | ZYX-5-67            |
| 2 Origin                 |                     |
| 3 Solvent                | CDC13               |
| 4 Temperature            | 299.6               |
| 5 Number of Scans        | 300                 |
| 6 Acquisition Time       | 1.0000              |
| 7 Acquisition Date       | 2022-05-20T18:23:38 |
| 8 Spectrometer Frequency | 100.56              |
| 9 Spectral Width         | 26041.0             |

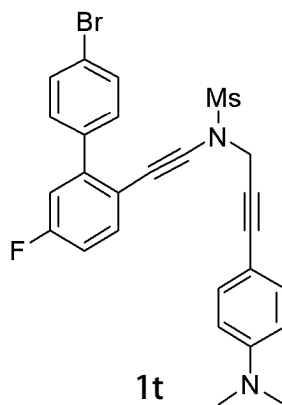

163.40  
160.91  
150.53  
144.58  
144.50  
138.23  
134.89  
134.80  
132.90  
131.25  
130.73  
122.15  
116.75  
116.72  
116.19  
115.96  
114.71  
114.49  
111.68  
107.90  
88.22  
84.22  
79.17  
77.32  
77.00  
76.68  
69.64  
43.12  
40.03  
38.52

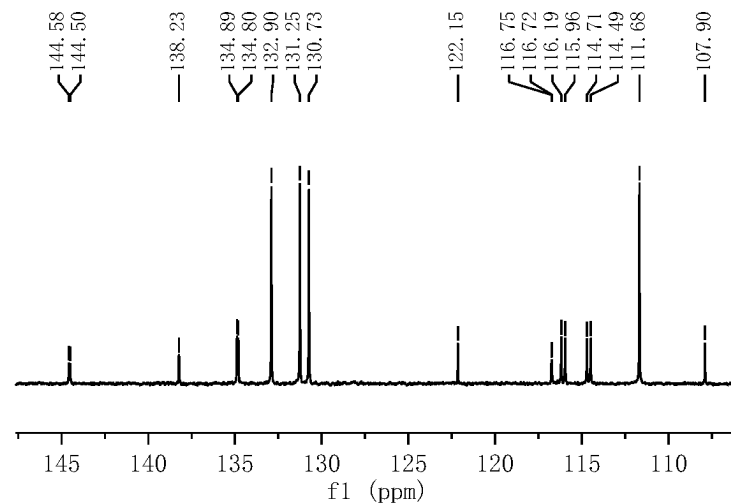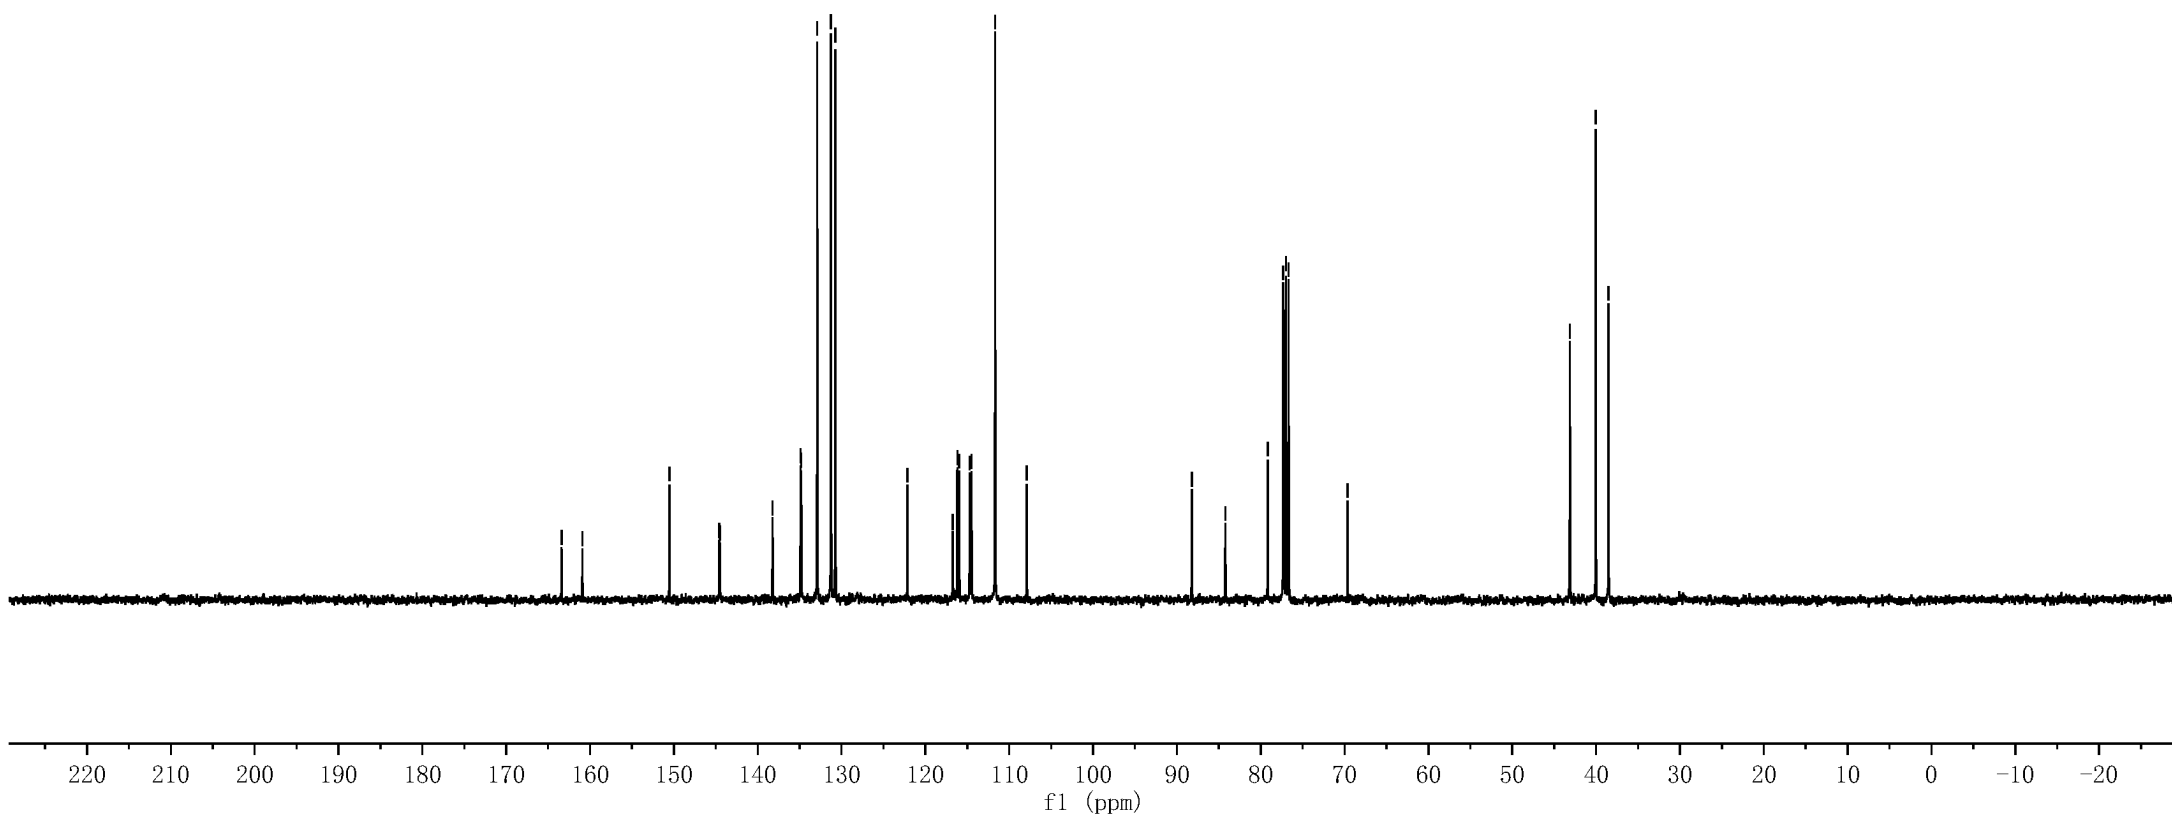

| Parameter                | Value               |
|--------------------------|---------------------|
| 1 Title                  | ZYX-5-79-FF         |
| 2 Origin                 | Bruker BioSpin GmbH |
| 3 Solvent                | CDCl3               |
| 4 Temperature            | 295.6               |
| 5 Number of Scans        | 49                  |
| 6 Acquisition Time       | 0.7340              |
| 7 Acquisition Date       | 2022-05-28T11:04:14 |
| 8 Spectrometer Frequency | 376.31              |
| 9 Spectral Width         | 89285.7             |

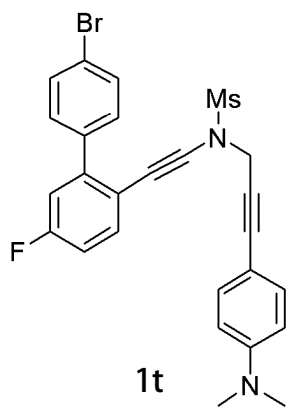

113.55  
113.57  
113.60  
113.62

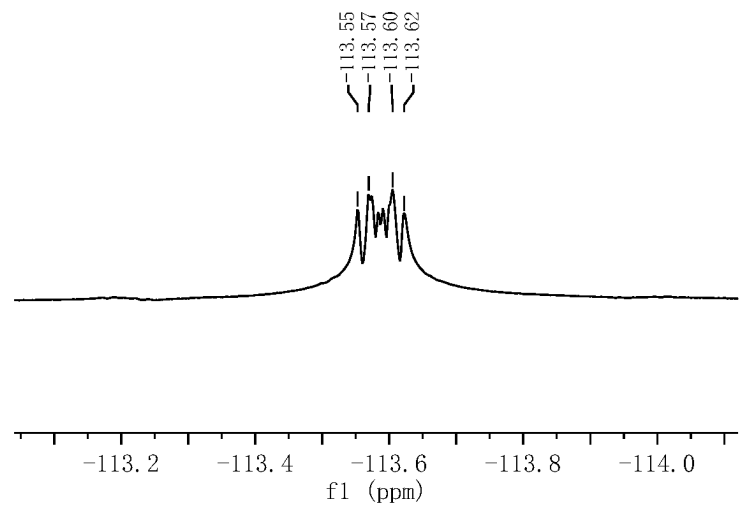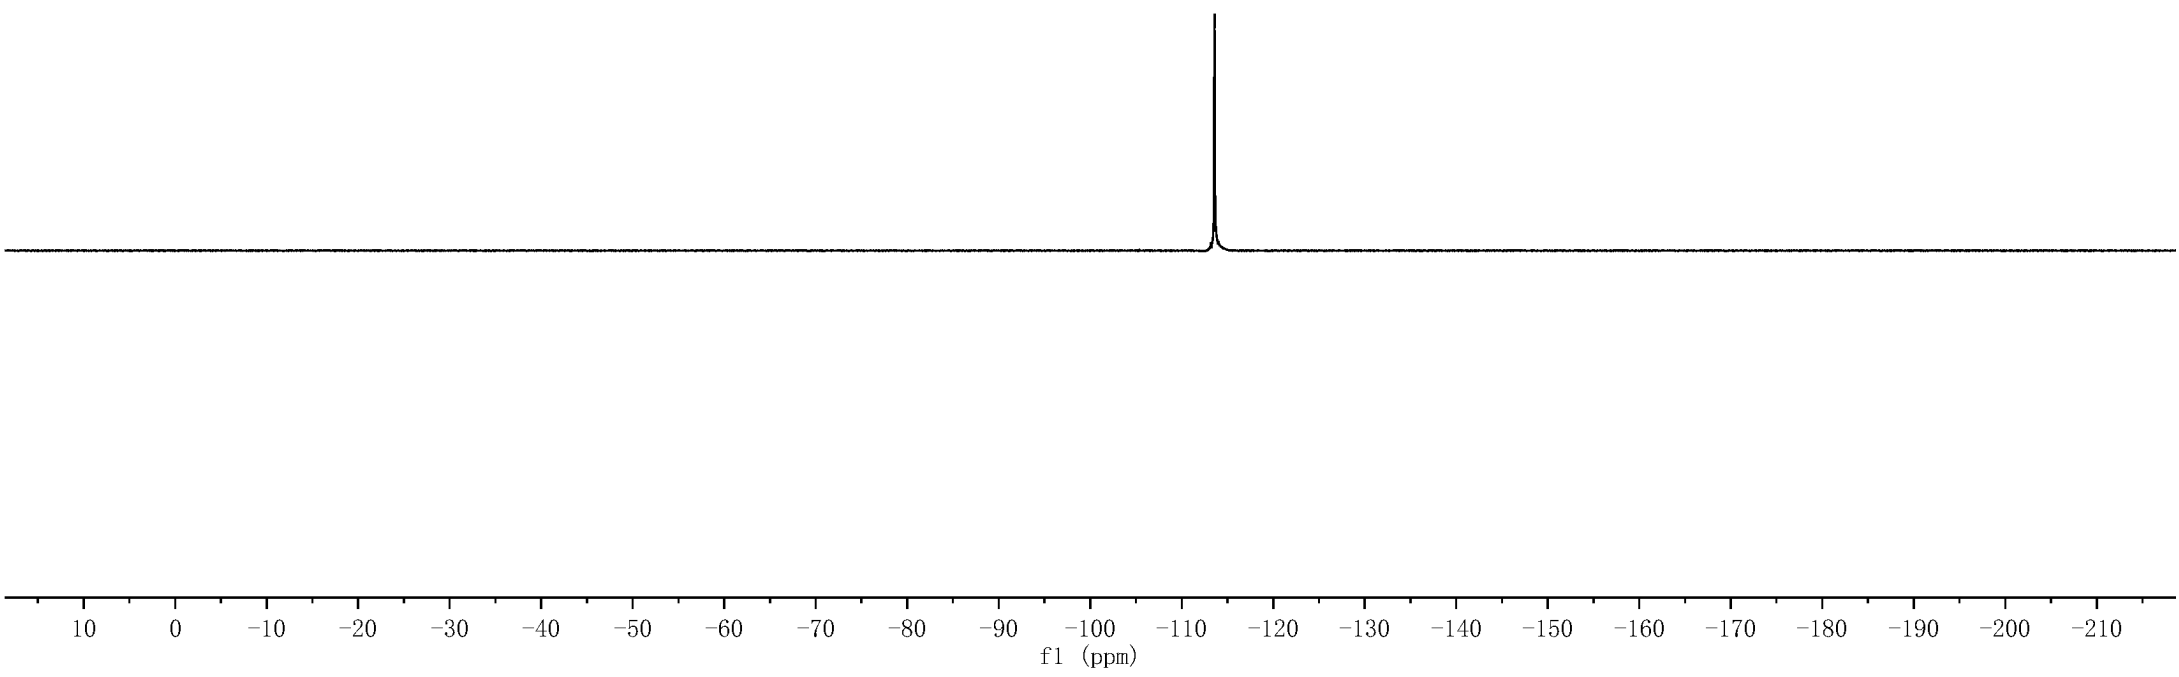

| Parameter                | Value               |
|--------------------------|---------------------|
| 1 Title                  | ZYX-5-48-H          |
| 2 Origin                 | Bruker BioSpin GmbH |
| 3 Solvent                | CDCl3               |
| 4 Temperature            | 294.9               |
| 5 Number of Scans        | 11                  |
| 6 Acquisition Time       | 3.9846              |
| 7 Acquisition Date       | 2022-05-10T15:56:29 |
| 8 Spectrometer Frequency | 399.93              |
| 9 Spectral Width         | 8223.7              |

7.498  
7.476  
7.454  
7.432  
7.323  
7.318  
7.273  
7.267  
7.251  
7.246  
6.611  
6.589

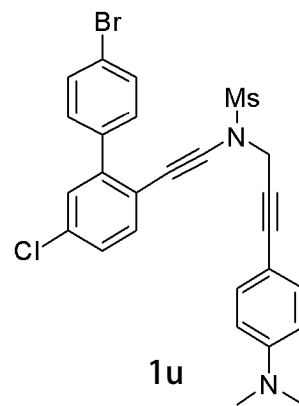

4.463

2.979  
2.960

0.000

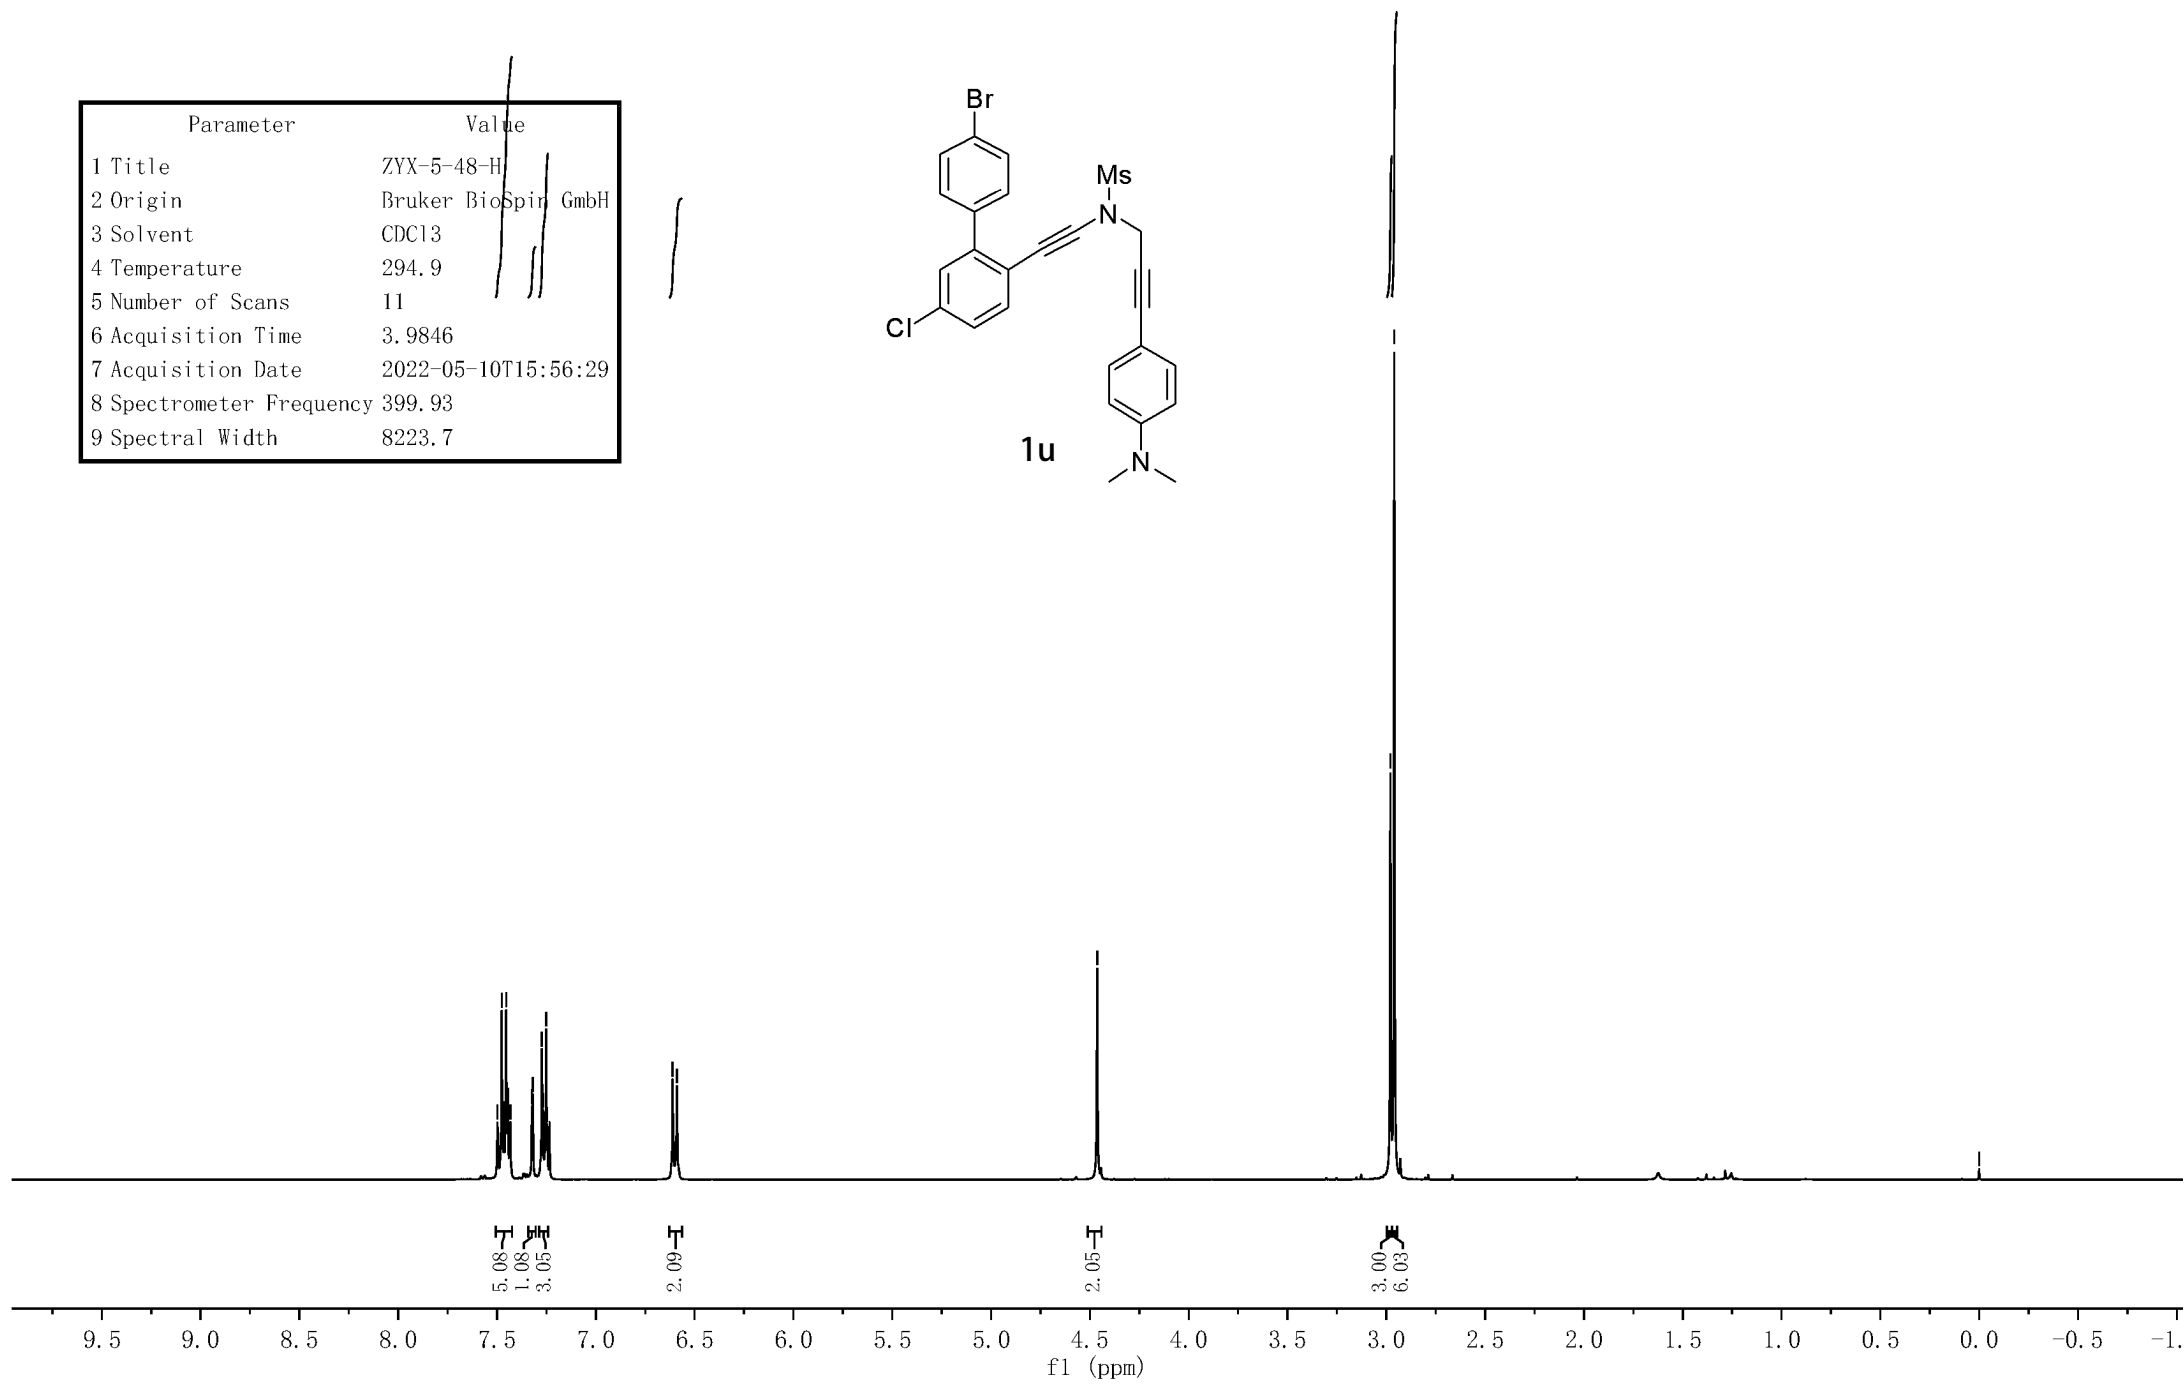

| Parameter                | Value               |
|--------------------------|---------------------|
| 1 Title                  | ZYX-5-48-C          |
| 2 Origin                 | Bruker BioSpin GmbH |
| 3 Solvent                | CDCl3               |
| 4 Temperature            | 295.2               |
| 5 Number of Scans        | 35                  |
| 6 Acquisition Time       | 1.3631              |
| 7 Acquisition Date       | 2022-05-10T15:57:45 |
| 8 Spectrometer Frequency | 100.56              |
| 9 Spectral Width         | 24038.5             |

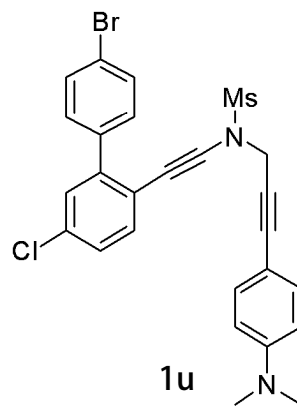

150.49  
 143.54  
 137.99  
 133.92  
 133.81  
 132.88  
 131.25  
 130.72  
 129.04  
 127.47  
 122.14  
 119.24  
 111.63  
 107.79

88.27  
 85.45  
 79.06  
 77.32  
 77.00  
 76.68  
 69.78

43.10  
 40.02  
 38.58

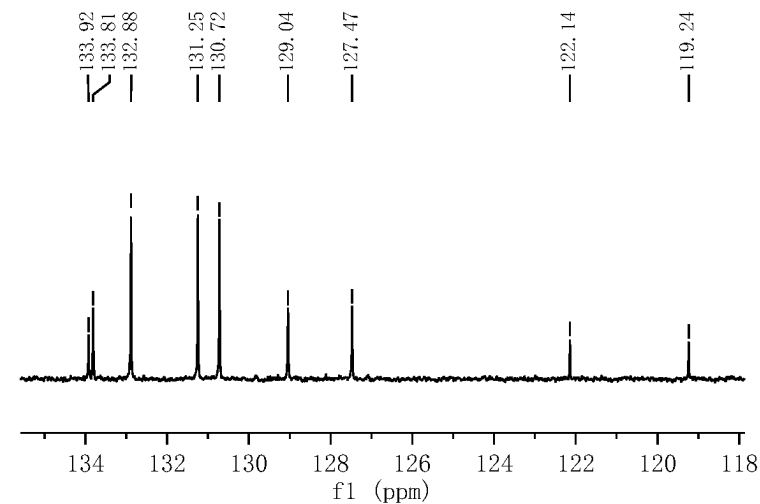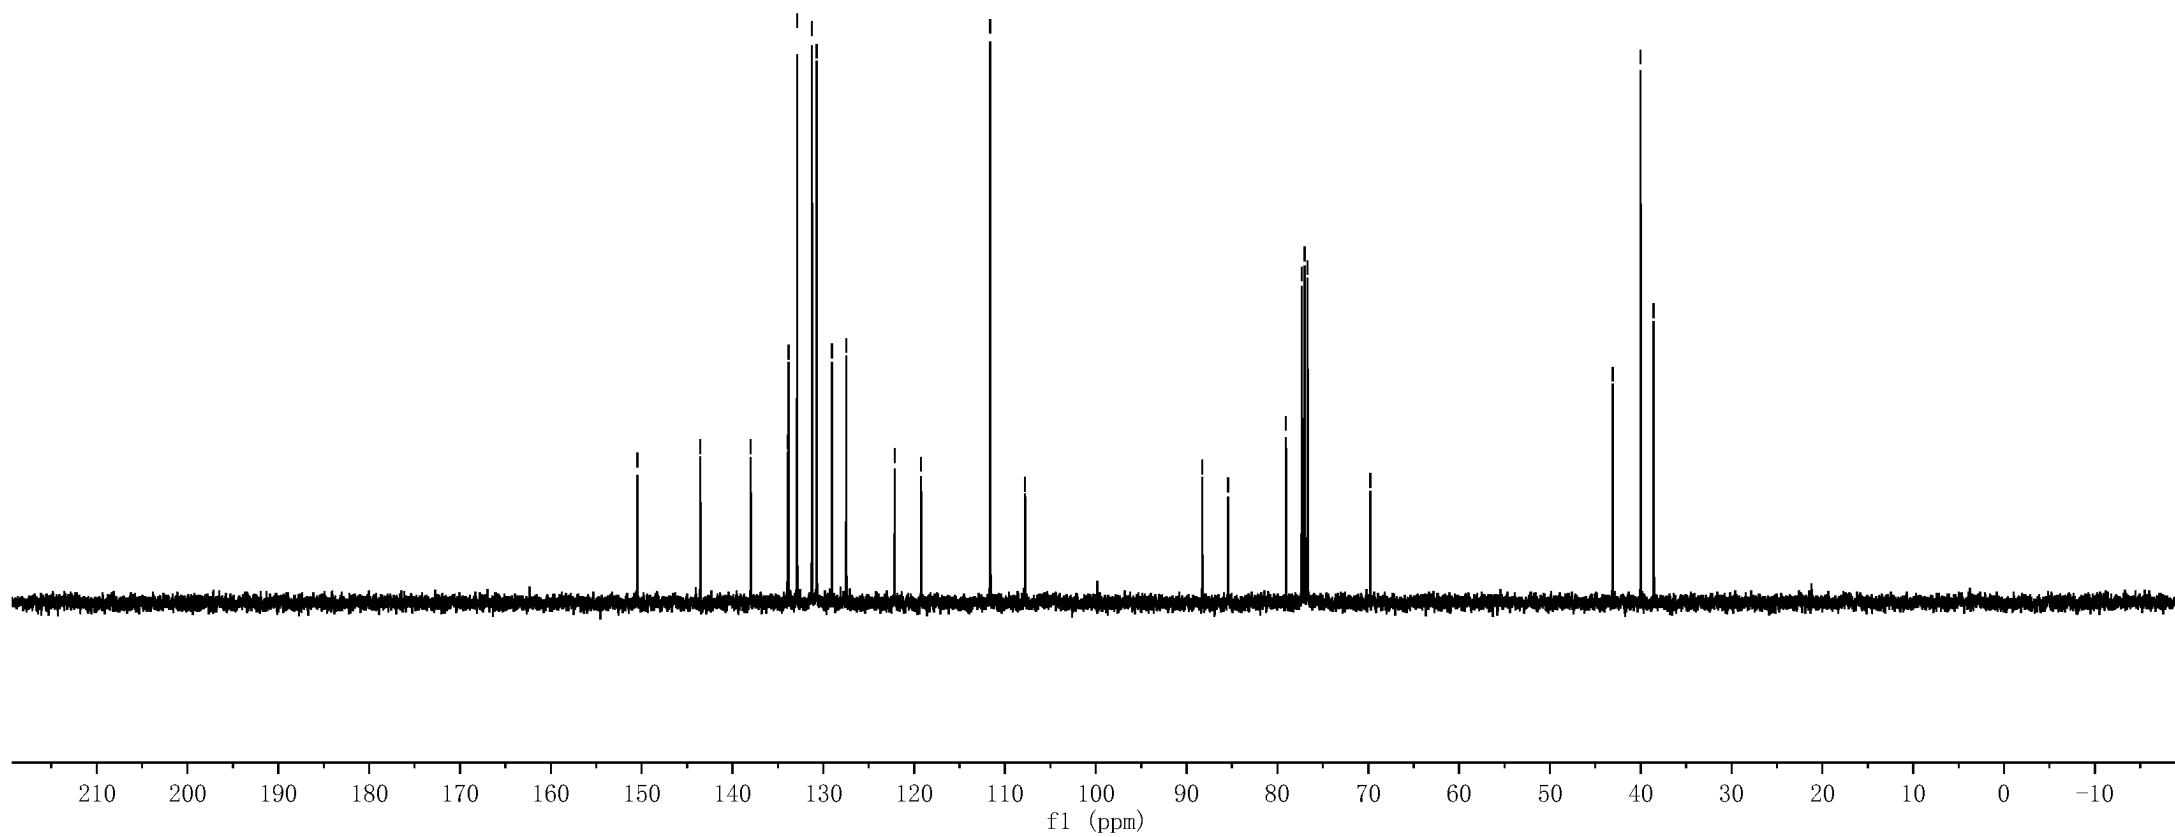

| Parameter                | Value               |
|--------------------------|---------------------|
| 1 Title                  | ZYX-5-62-H          |
| 2 Origin                 | Bruker BioSpin GmbH |
| 3 Solvent                | CDCl3               |
| 4 Temperature            | 294.4               |
| 5 Number of Scans        | 13                  |
| 6 Acquisition Time       | 3.9846              |
| 7 Acquisition Date       | 2022-05-17T16:49:42 |
| 8 Spectrometer Frequency | 399.93              |
| 9 Spectral Width         | 8223.7              |

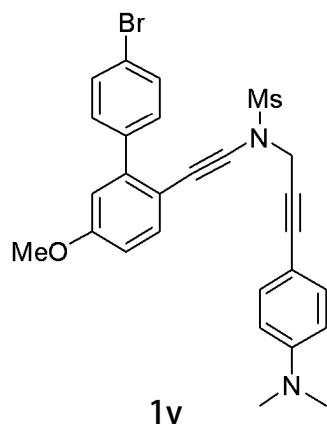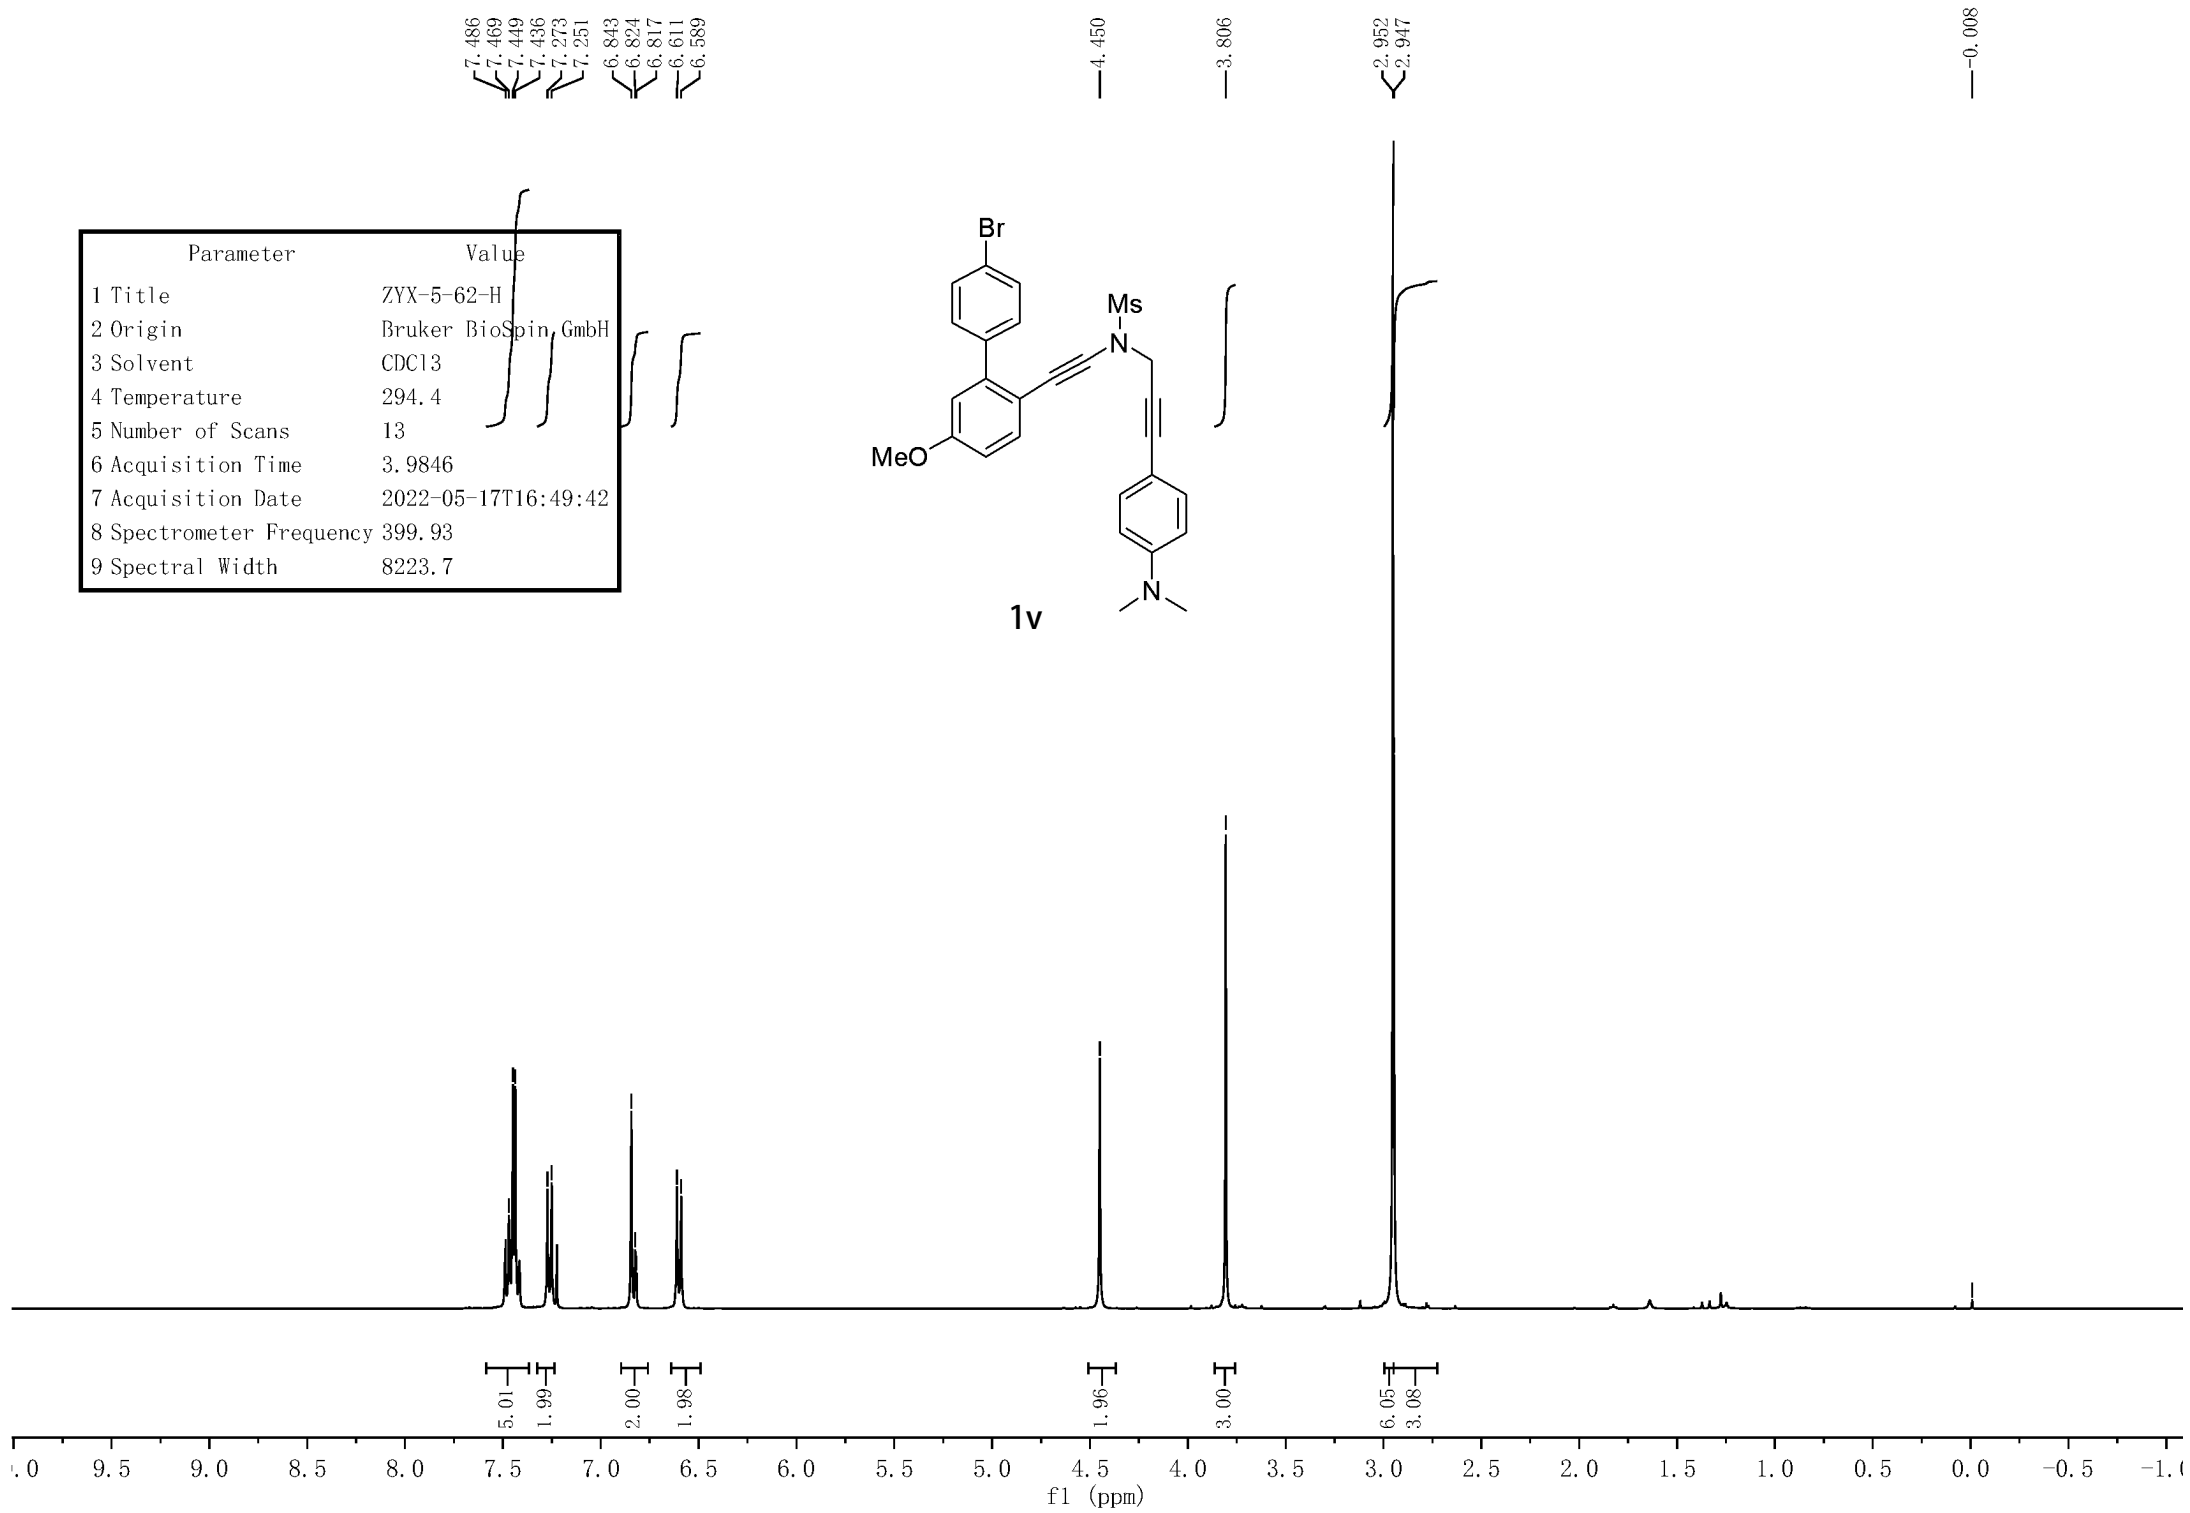

| Parameter                | Value               |
|--------------------------|---------------------|
| 1 Title                  | ZYX-5-62-C          |
| 2 Origin                 | Bruker BioSpin GmbH |
| 3 Solvent                | CDC13               |
| 4 Temperature            | 295.0               |
| 5 Number of Scans        | 48                  |
| 6 Acquisition Time       | 1.3631              |
| 7 Acquisition Date       | 2022-05-17T16:51:50 |
| 8 Spectrometer Frequency | 100.56              |
| 9 Spectral Width         | 24038.5             |

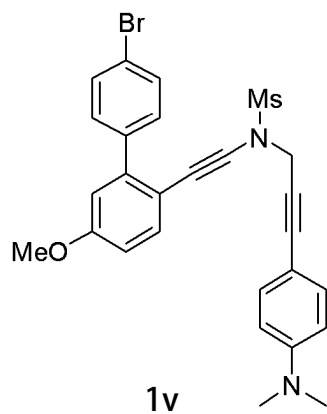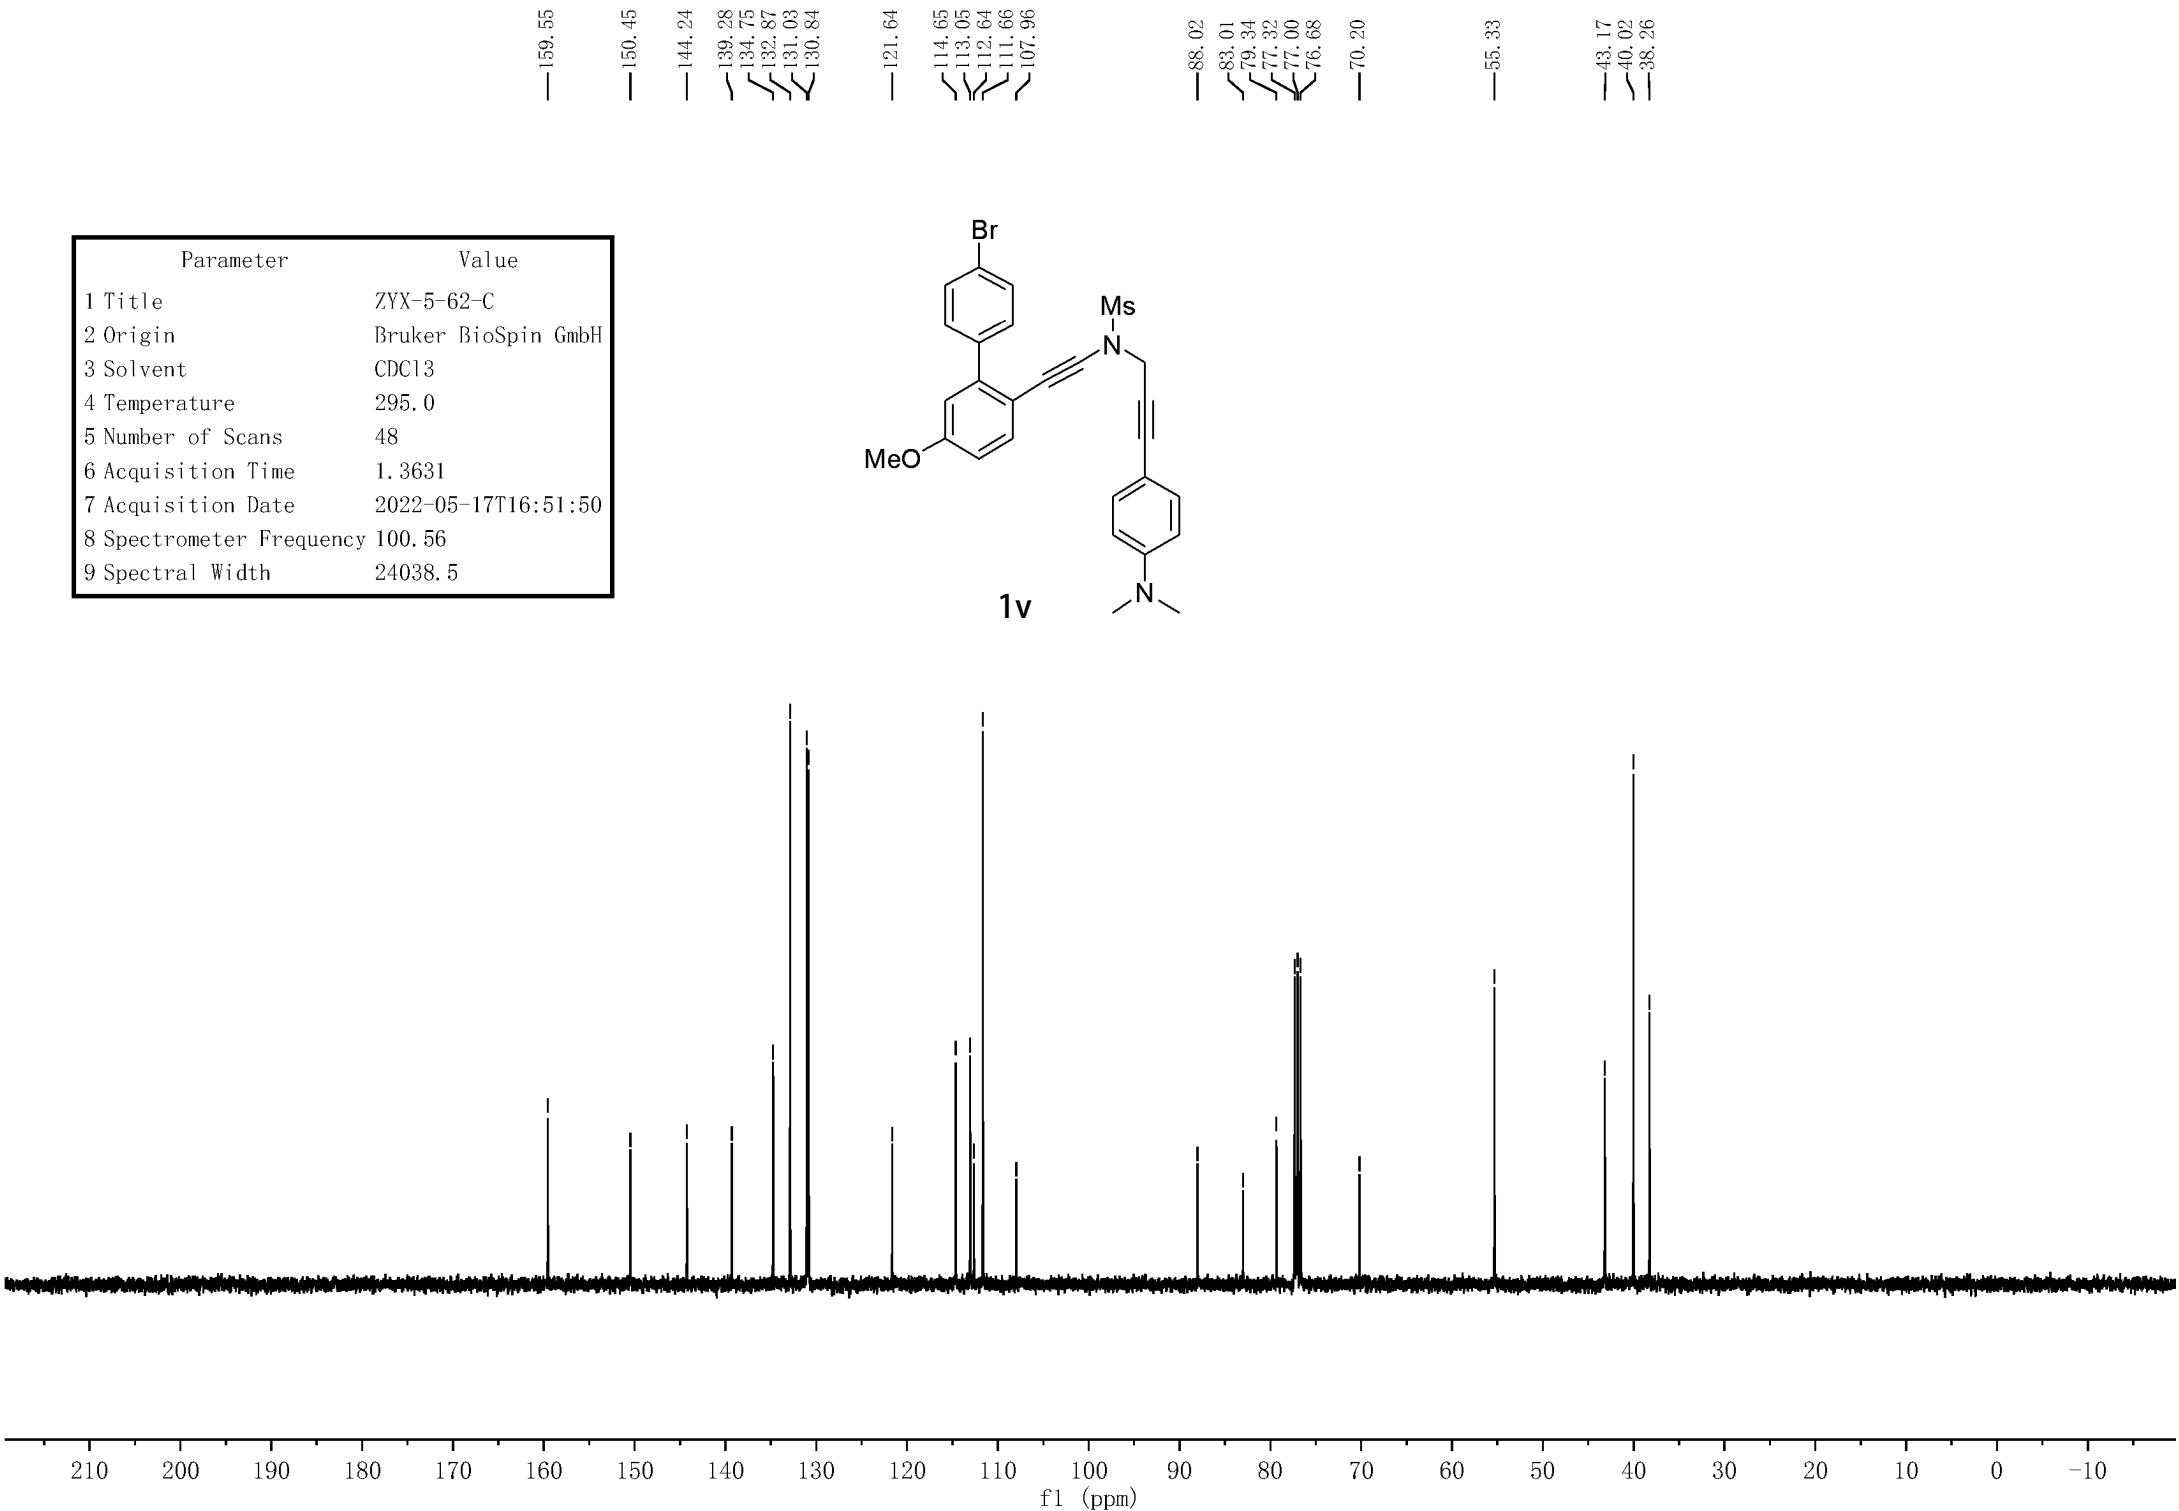



| Parameter                | Value               |
|--------------------------|---------------------|
| 1 Title                  | ZYX-5-68-H          |
| 2 Origin                 | Bruker BioSpin GmbH |
| 3 Solvent                | CDCl3               |
| 4 Temperature            | 297.0               |
| 5 Number of Scans        | 6                   |
| 6 Acquisition Time       | 3.9846              |
| 7 Acquisition Date       | 2022-05-21T10:57:07 |
| 8 Spectrometer Frequency | 399.93              |
| 9 Spectral Width         | 8223.7              |

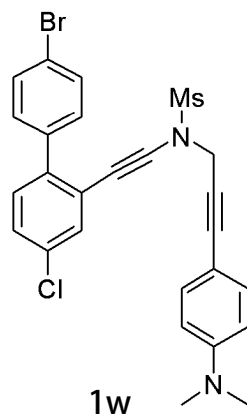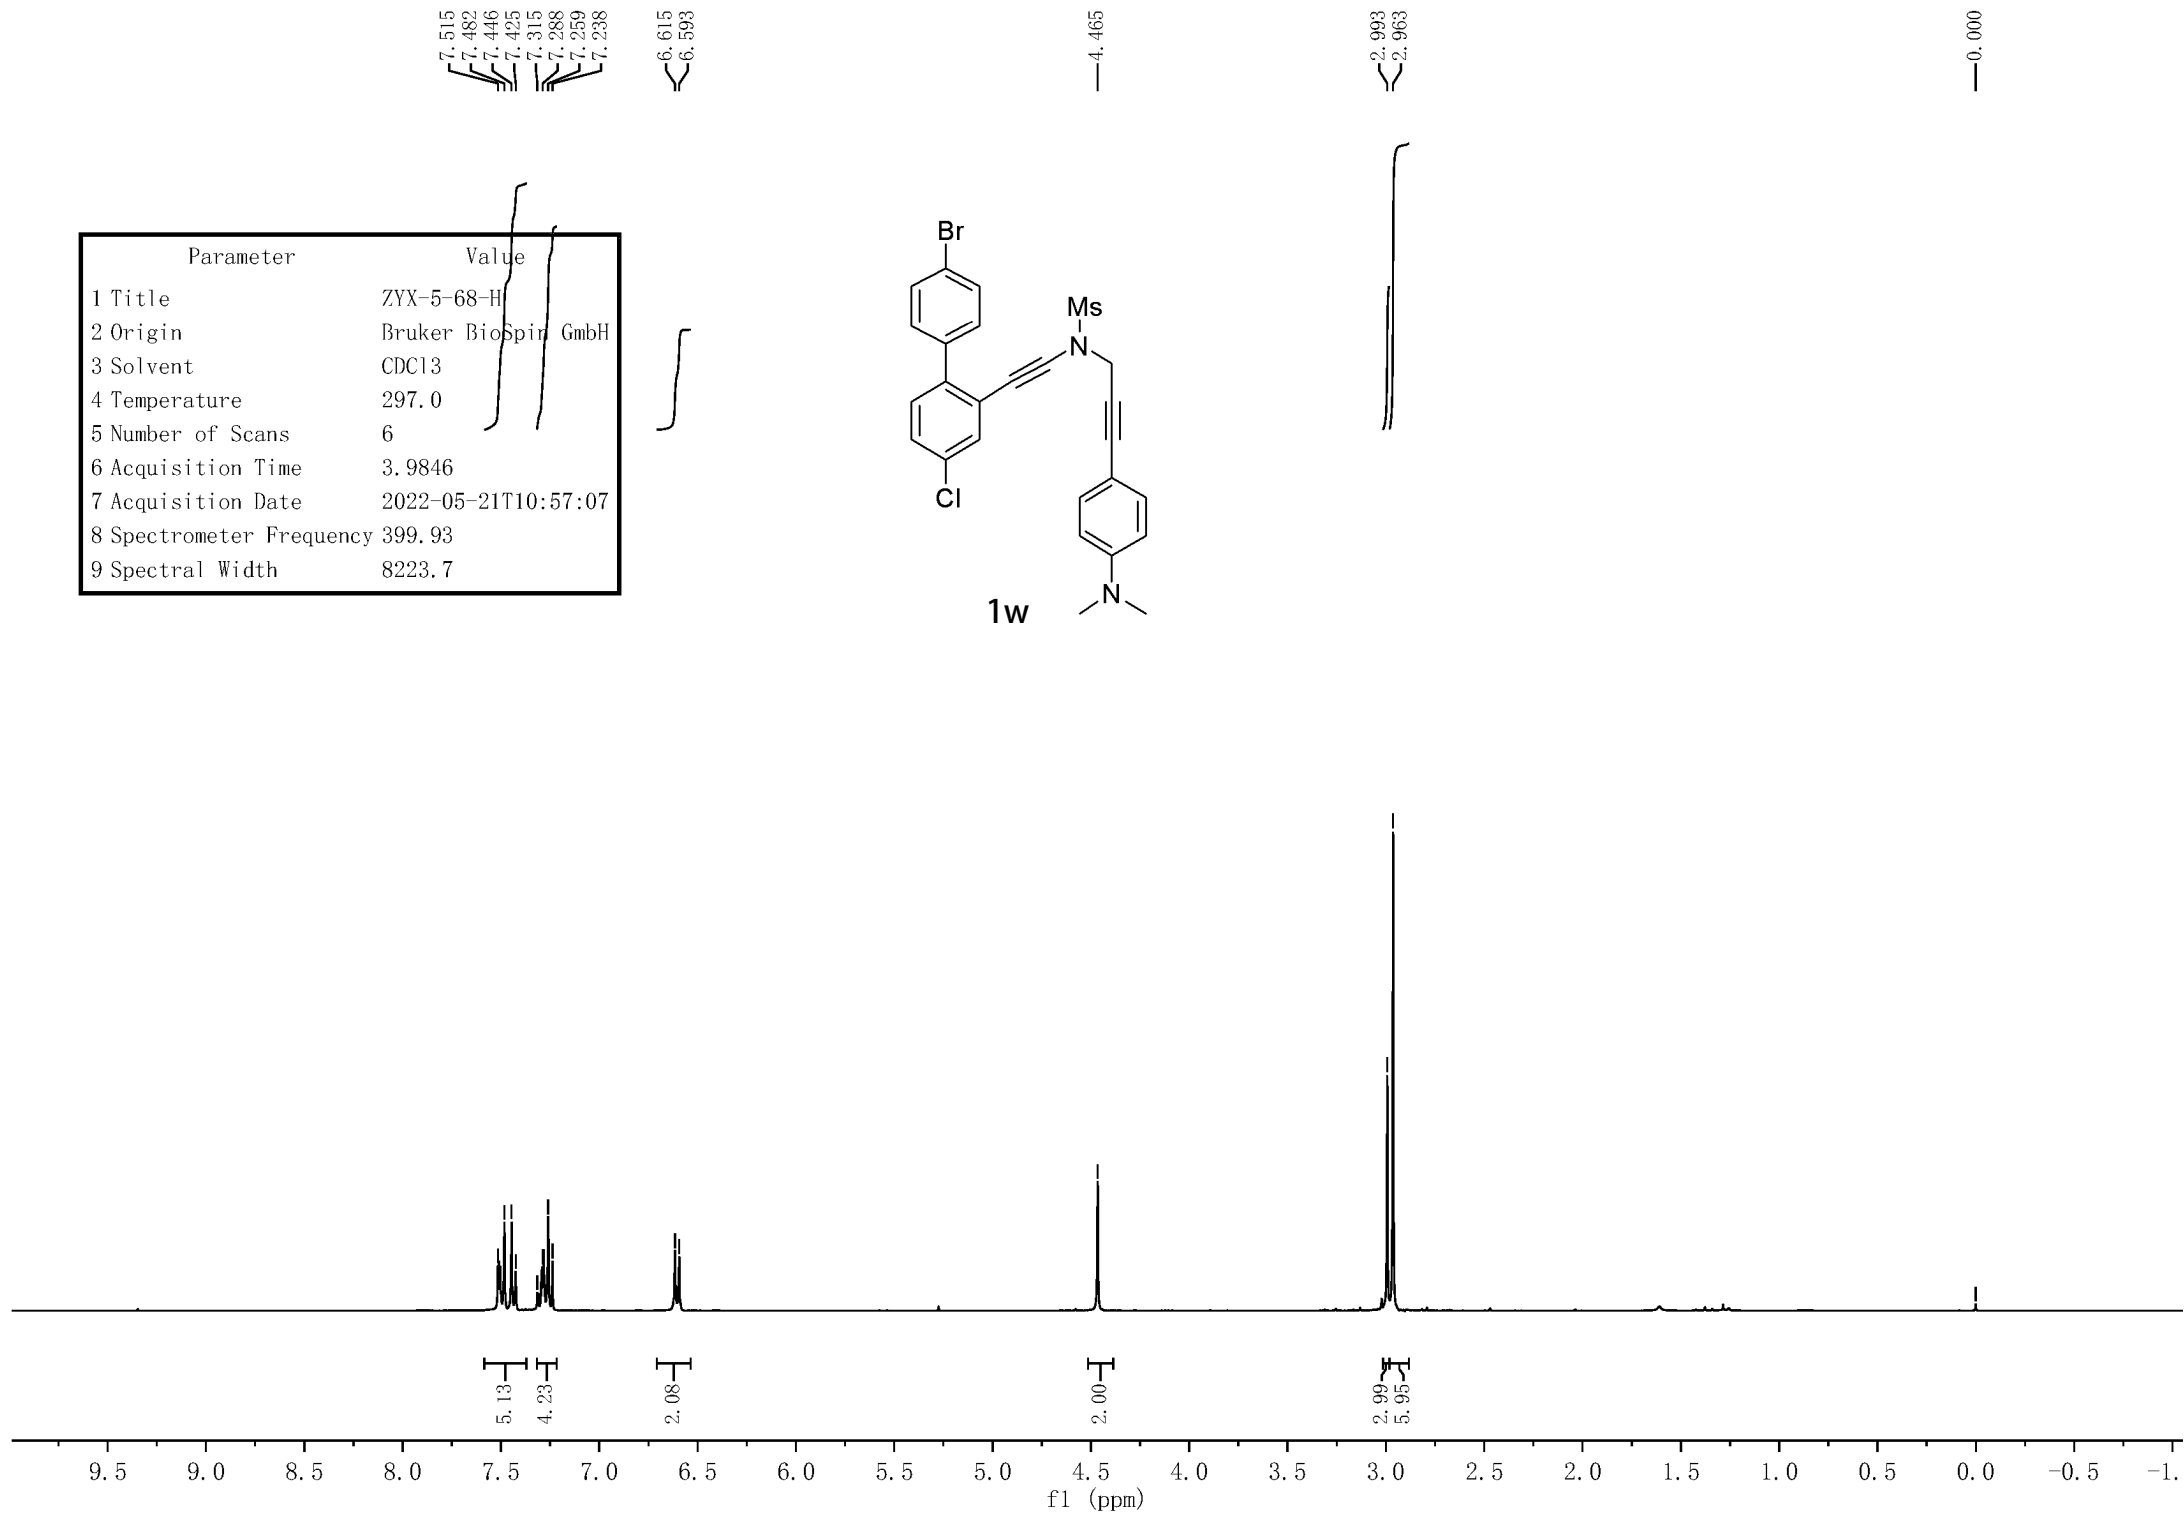

| Parameter                | Value               |
|--------------------------|---------------------|
| 1 Title                  | ZYX-5-68-C          |
| 2 Origin                 | Bruker BioSpin GmbH |
| 3 Solvent                | CDCl3               |
| 4 Temperature            | 297.2               |
| 5 Number of Scans        | 40                  |
| 6 Acquisition Time       | 1.3631              |
| 7 Acquisition Date       | 2022-05-21T10:58:16 |
| 8 Spectrometer Frequency | 100.56              |
| 9 Spectral Width         | 24038.5             |

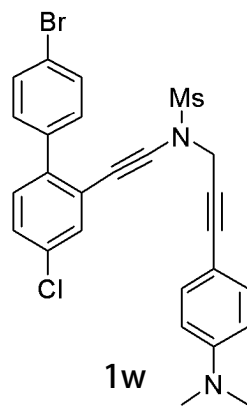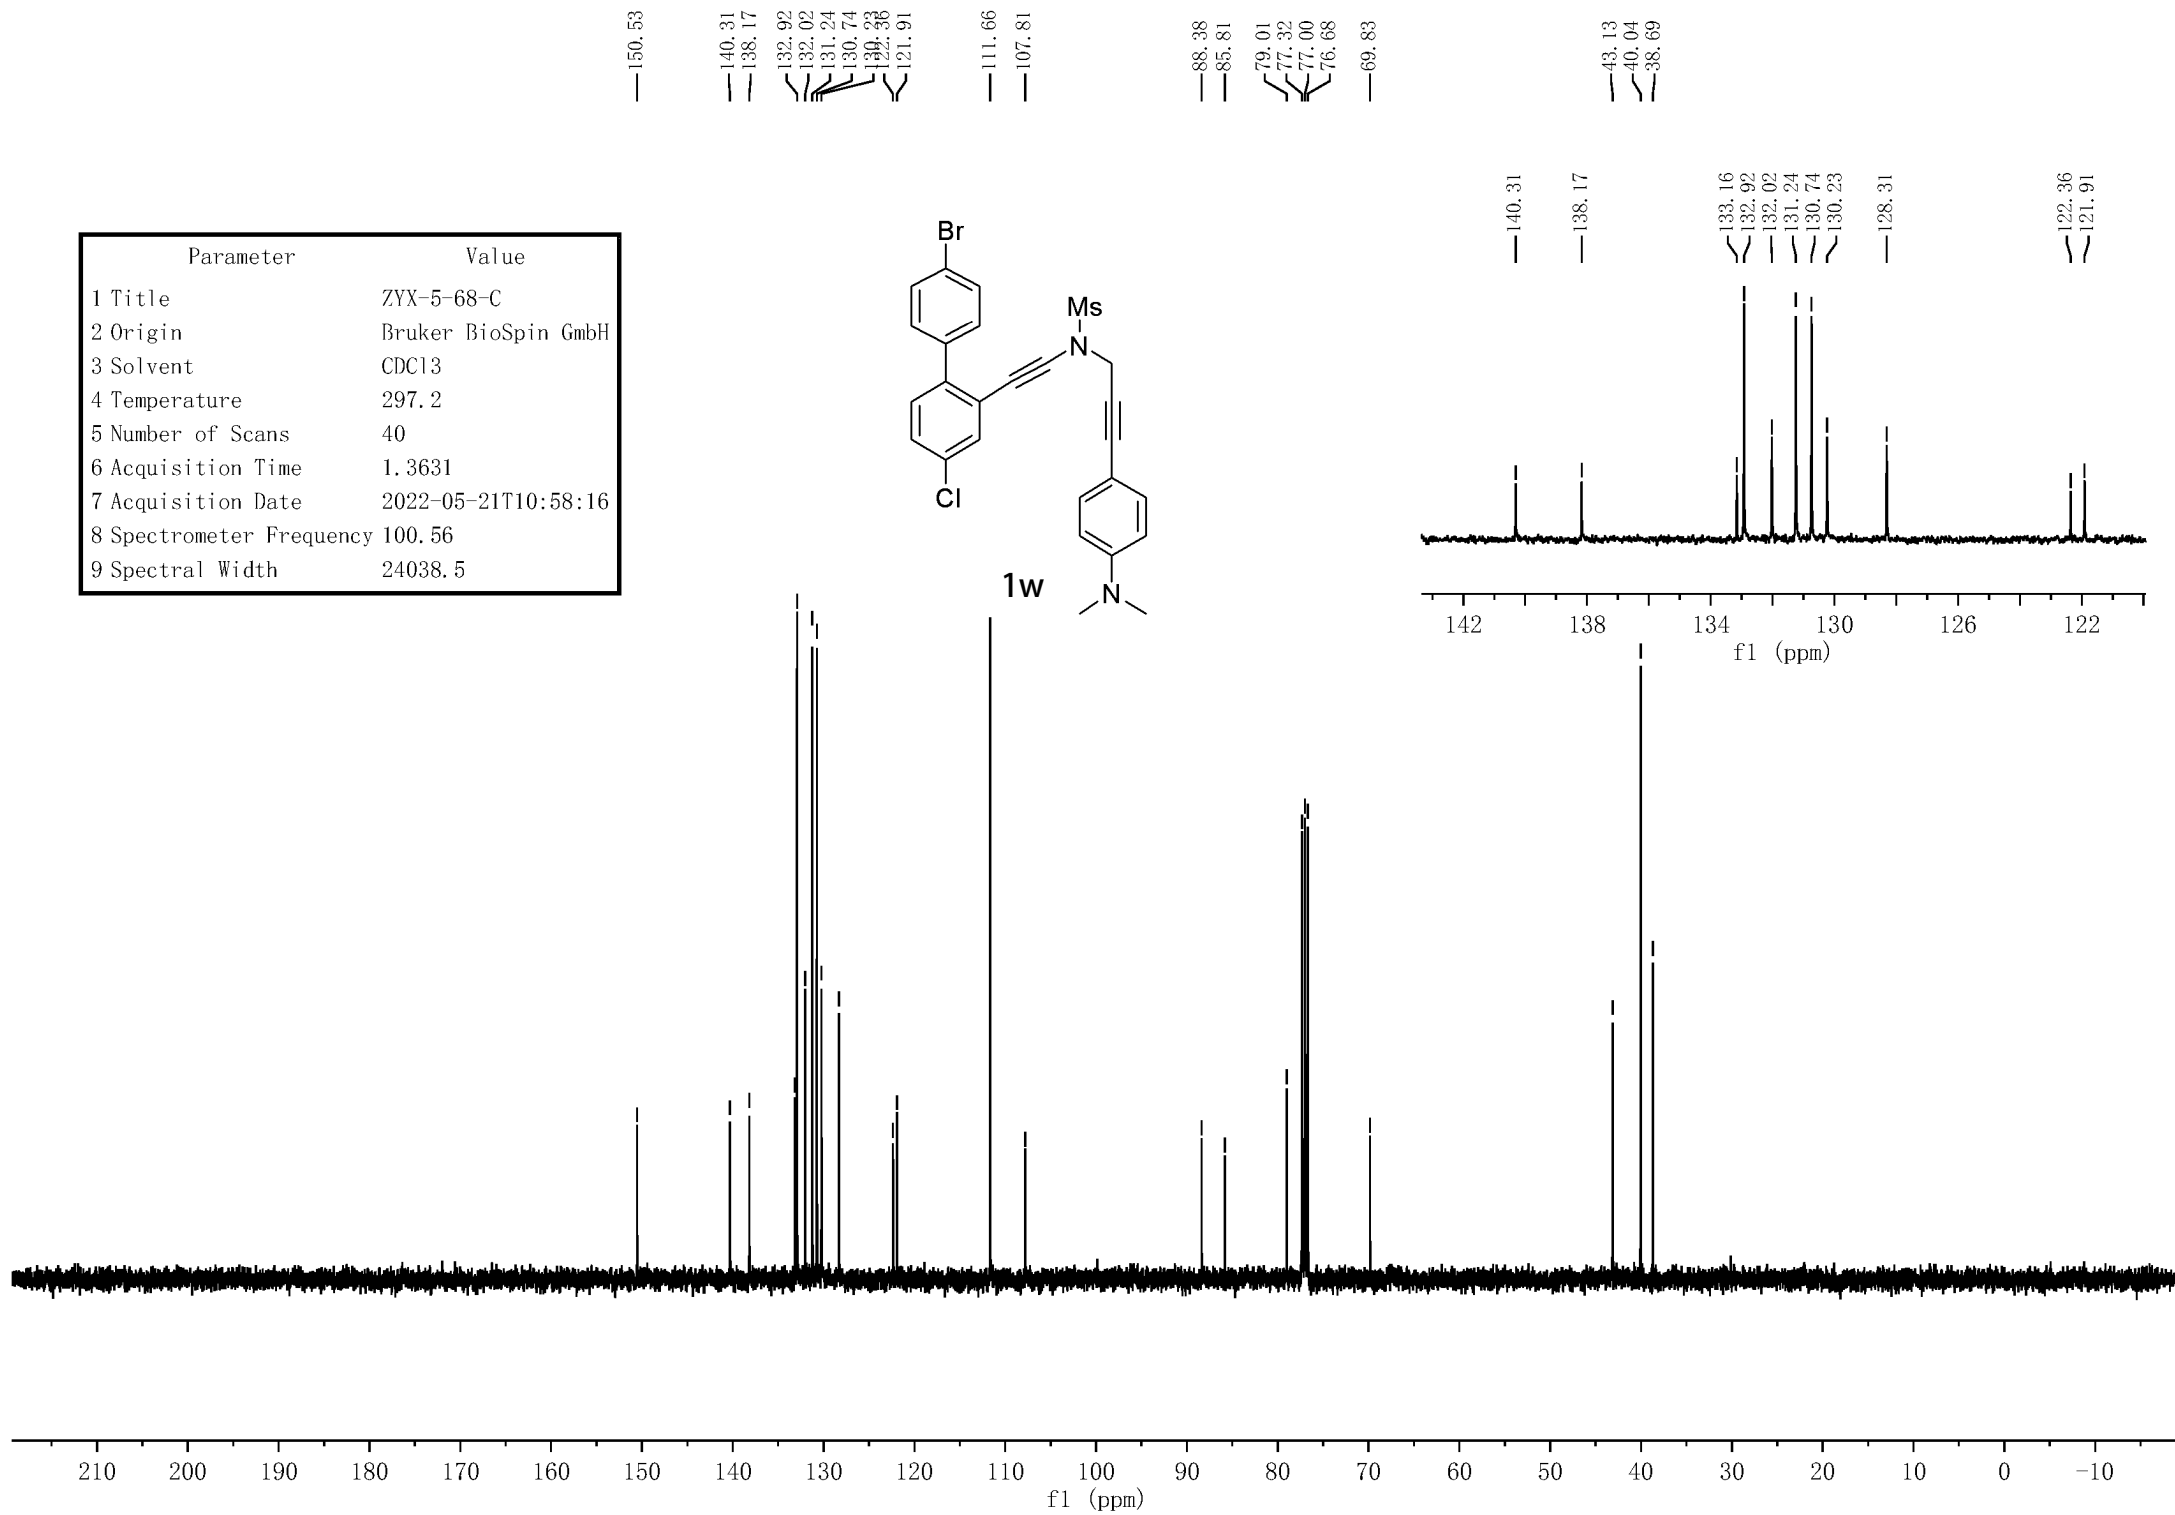

| Parameter                | Value               |
|--------------------------|---------------------|
| 1 Title                  | ZYX-5-61-H          |
| 2 Origin                 | Bruker BioSpin GmbH |
| 3 Solvent                | CDC13               |
| 4 Temperature            | 294.6               |
| 5 Number of Scans        | 10                  |
| 6 Acquisition Time       | 3.9846              |
| 7 Acquisition Date       | 2022-05-17T16:41:35 |
| 8 Spectrometer Frequency | 399.93              |
| 9 Spectral Width         | 8223.7              |

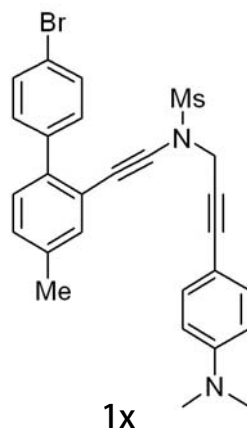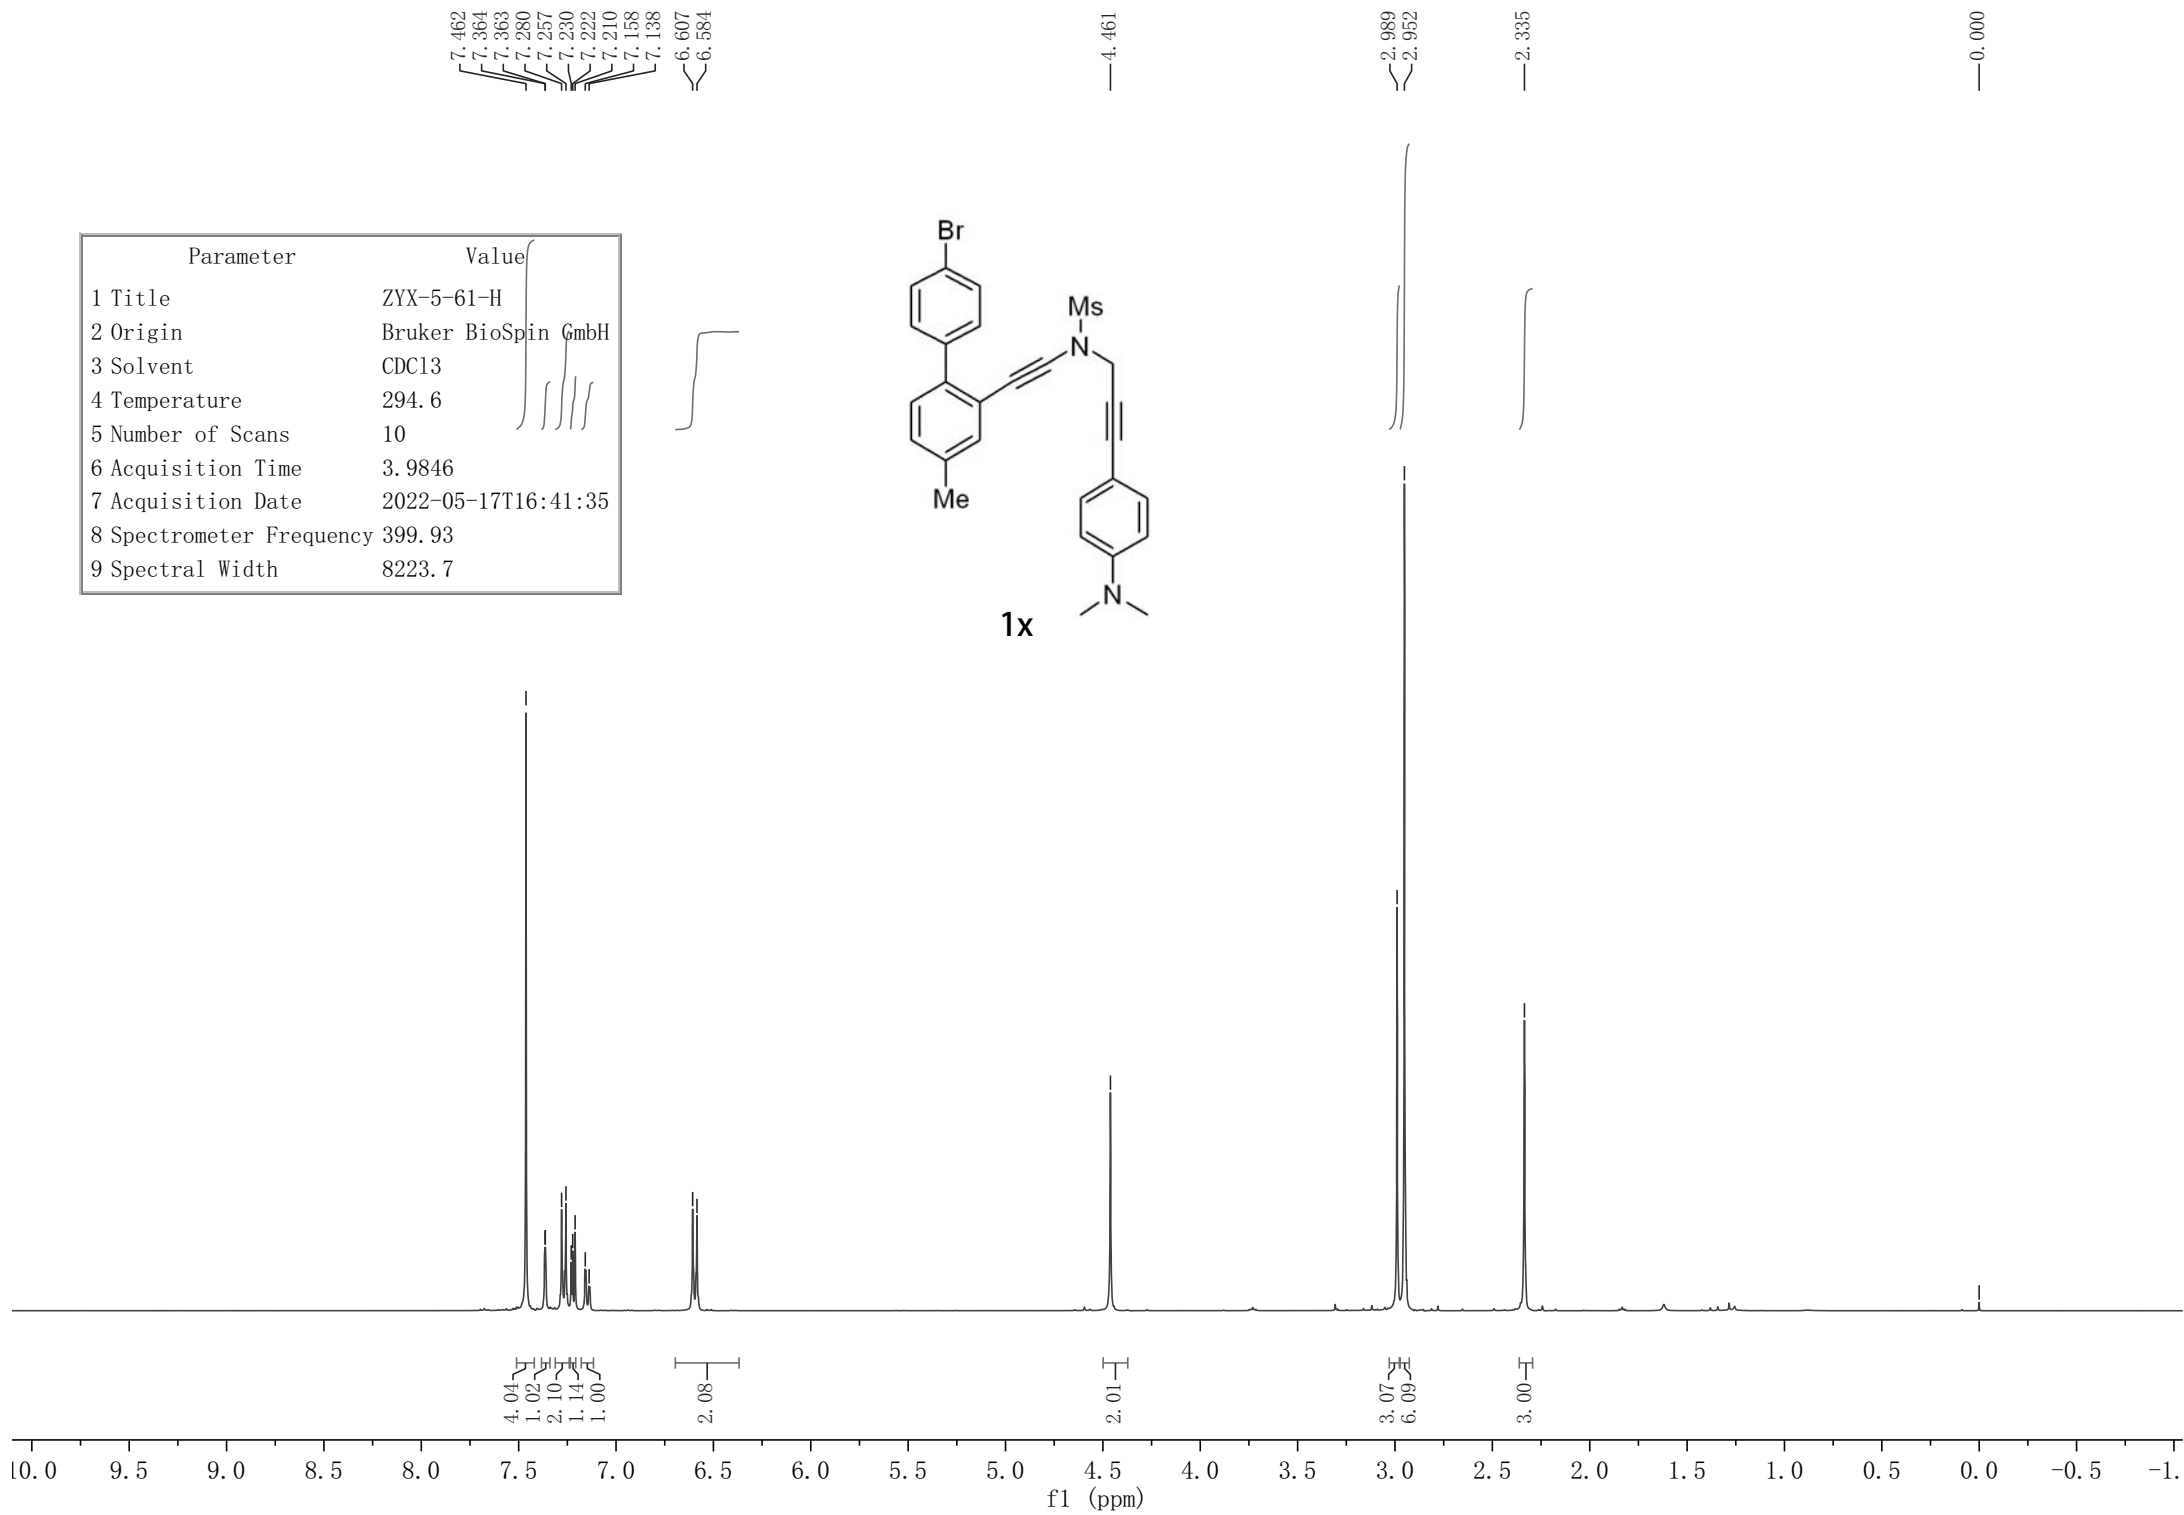

| Parameter                | Value               |
|--------------------------|---------------------|
| 1 Title                  | ZYX-5-61-C          |
| 2 Origin                 | Bruker BioSpin GmbH |
| 3 Solvent                | CDC13               |
| 4 Temperature            | 294.9               |
| 5 Number of Scans        | 53                  |
| 6 Acquisition Time       | 1.3631              |
| 7 Acquisition Date       | 2022-05-17T16:43:12 |
| 8 Spectrometer Frequency | 100.56              |
| 9 Spectral Width         | 24038.5             |

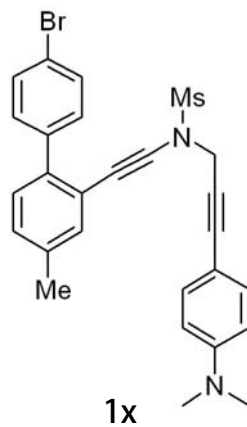

—150.46  
 —139.25  
 —139.21  
 —137.16  
 —133.17  
 —132.89  
 —131.02  
 —130.84  
 —129.18  
 —128.93  
 —121.27  
 —120.29  
 —111.62  
 —107.92

—88.15  
 —84.26  
 —79.20  
 —77.32  
 —77.00  
 —76.68  
 —70.80

—43.14  
 —40.02  
 —38.43  
 —20.75

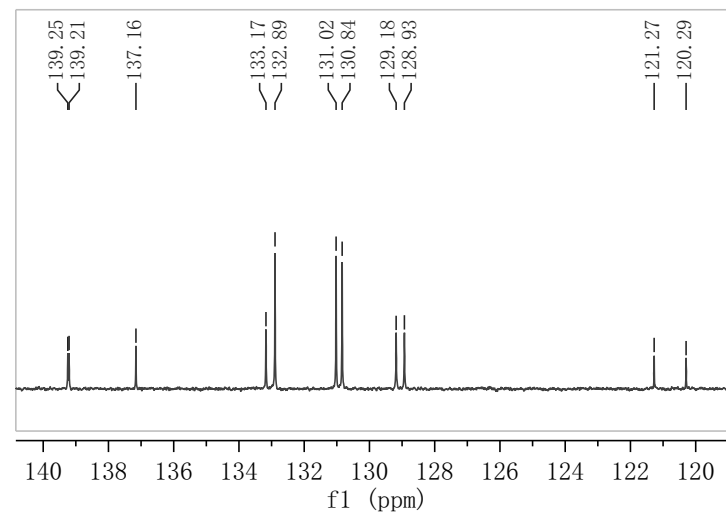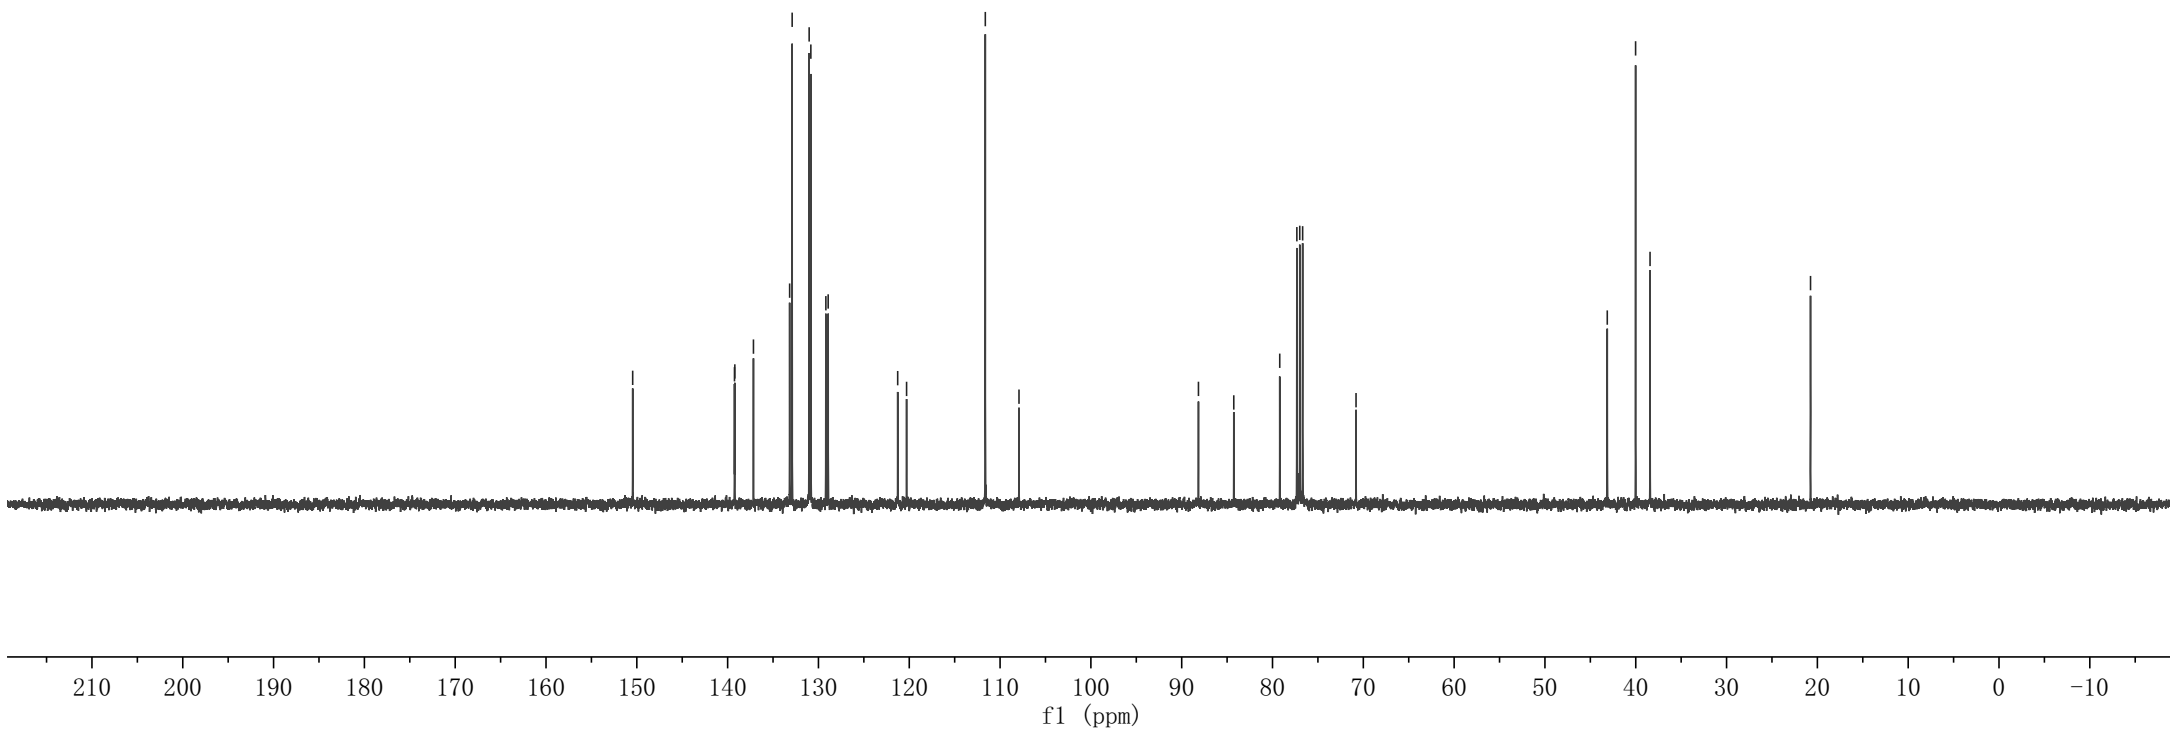

| Parameter                | Value               |
|--------------------------|---------------------|
| 1 Title                  | zyx-5-69            |
| 2 Origin                 |                     |
| 3 Solvent                | CDC13               |
| 4 Temperature            | 299.3               |
| 5 Number of Scans        | 16                  |
| 6 Acquisition Time       | 4.0002              |
| 7 Acquisition Date       | 2022-05-21T11:53:40 |
| 8 Spectrometer Frequency | 399.92              |
| 9 Spectral Width         | 8012.0              |

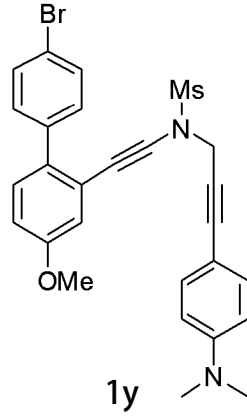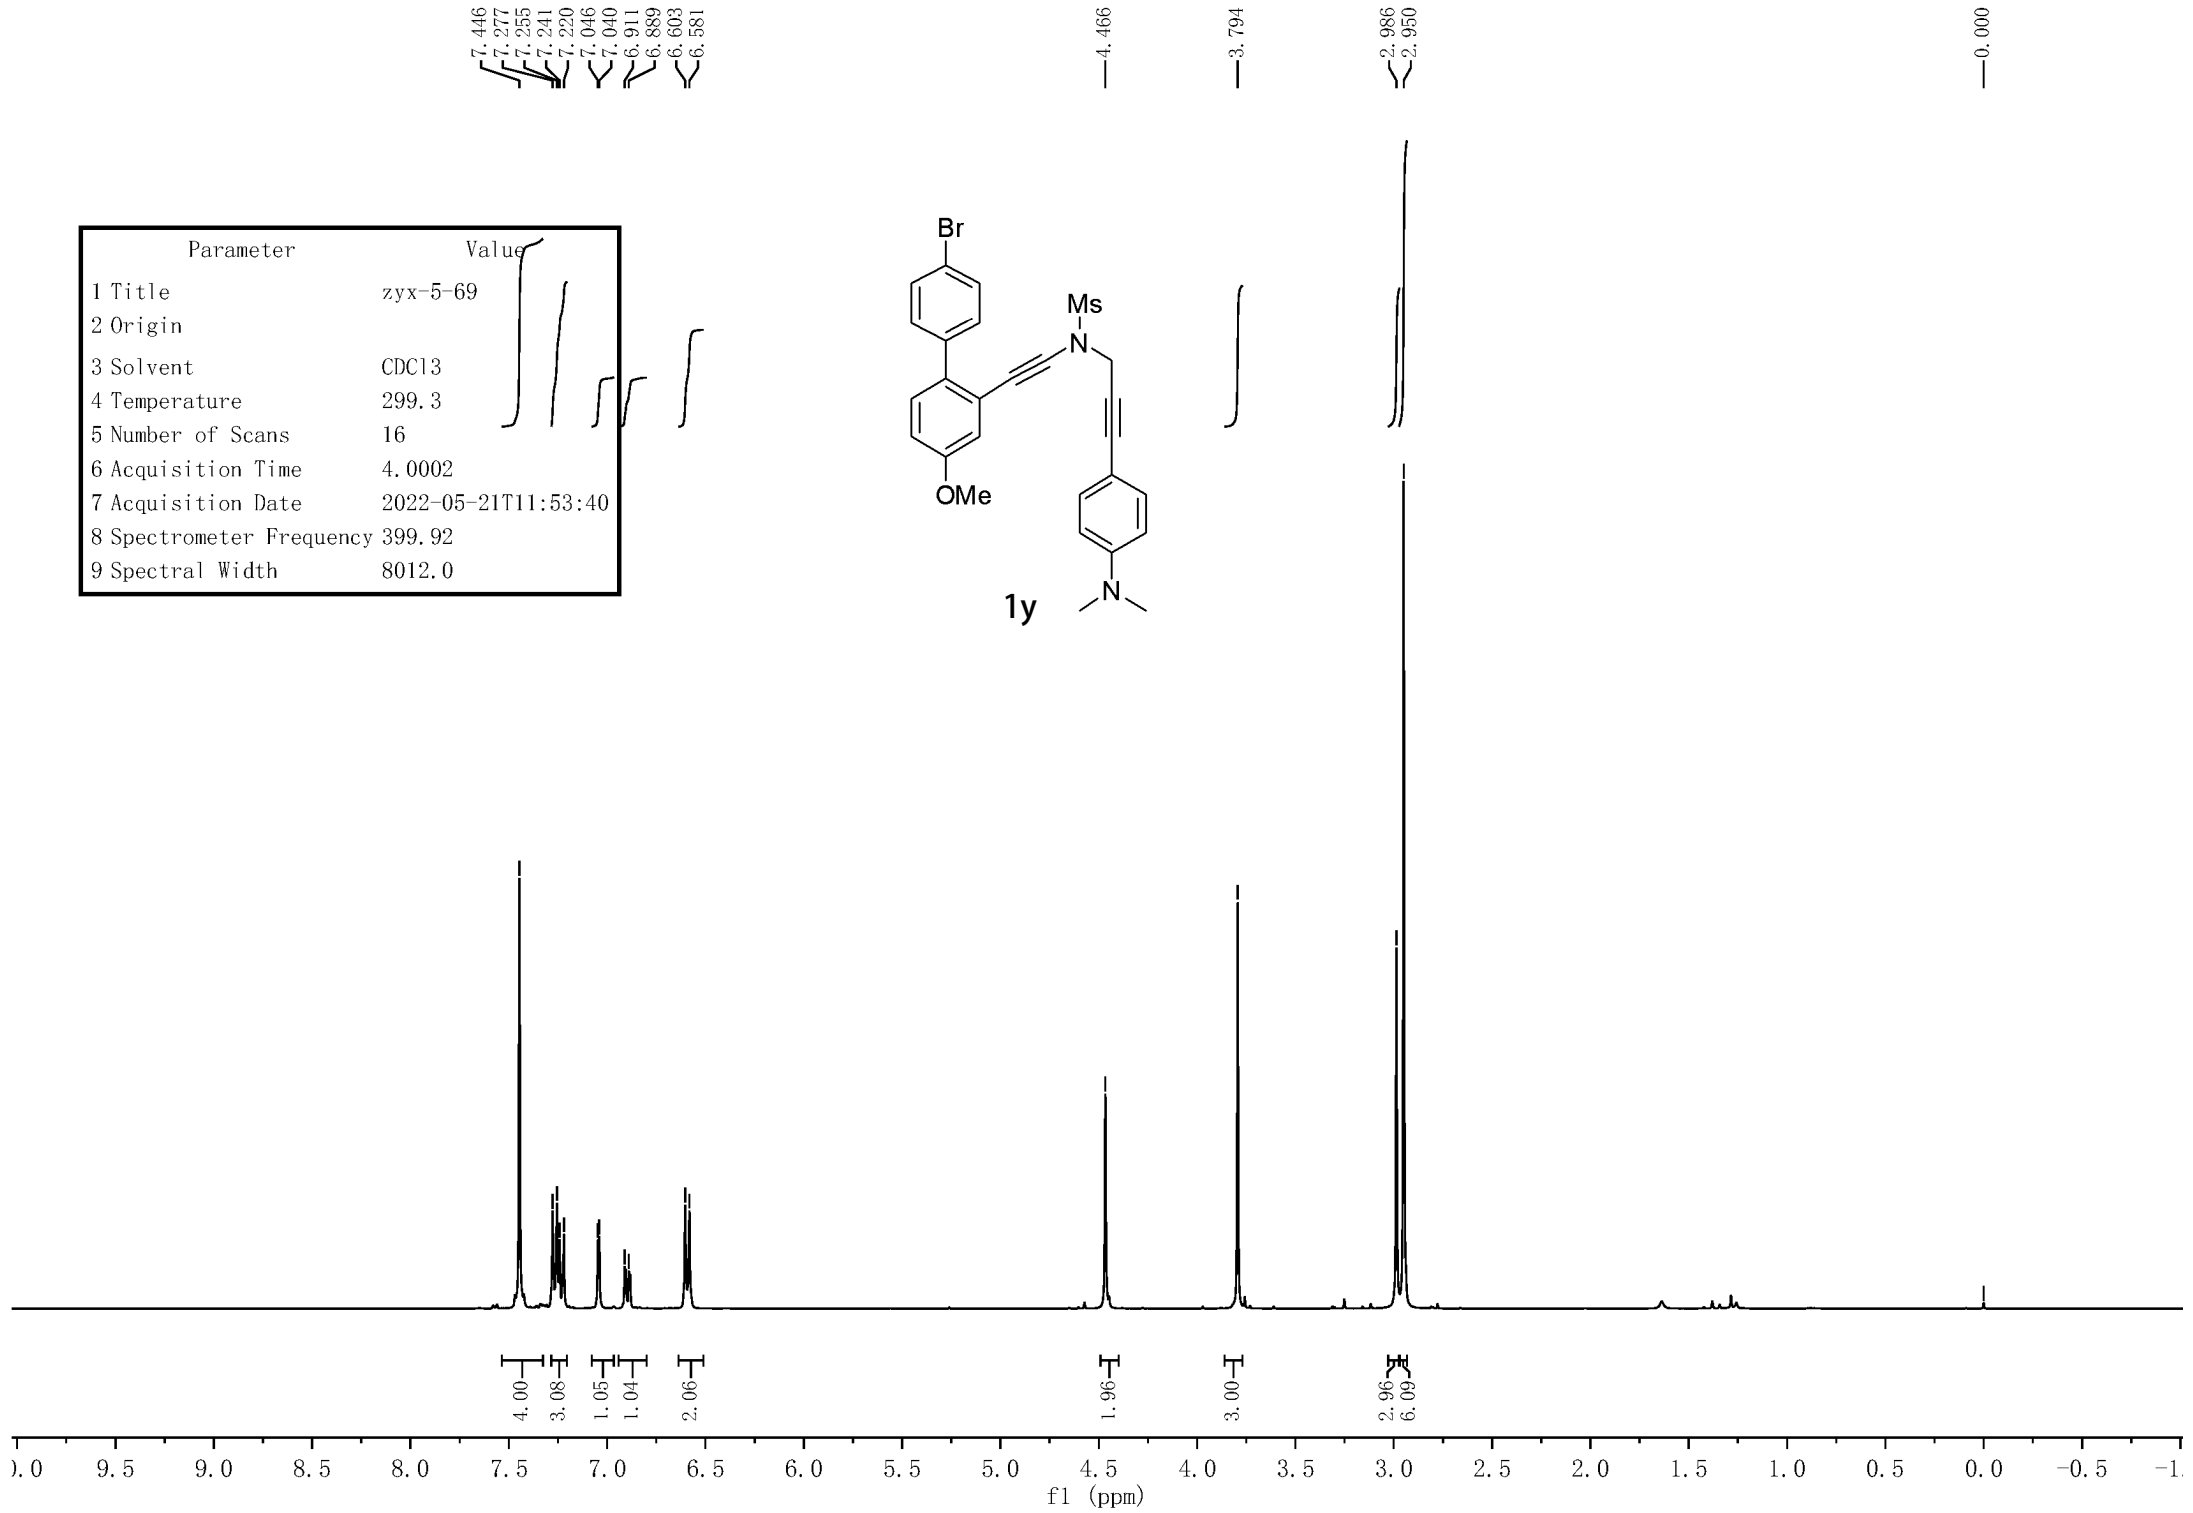

| Parameter                | Value               |
|--------------------------|---------------------|
| 1 Title                  | zyx-5-69            |
| 2 Origin                 |                     |
| 3 Solvent                | CDCl3               |
| 4 Temperature            | 299.1               |
| 5 Number of Scans        | 300                 |
| 6 Acquisition Time       | 1.0000              |
| 7 Acquisition Date       | 2022-05-21T12:05:57 |
| 8 Spectrometer Frequency | 100.56              |
| 9 Spectral Width         | 26041.0             |

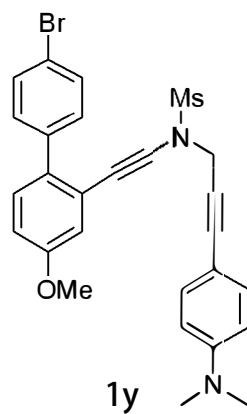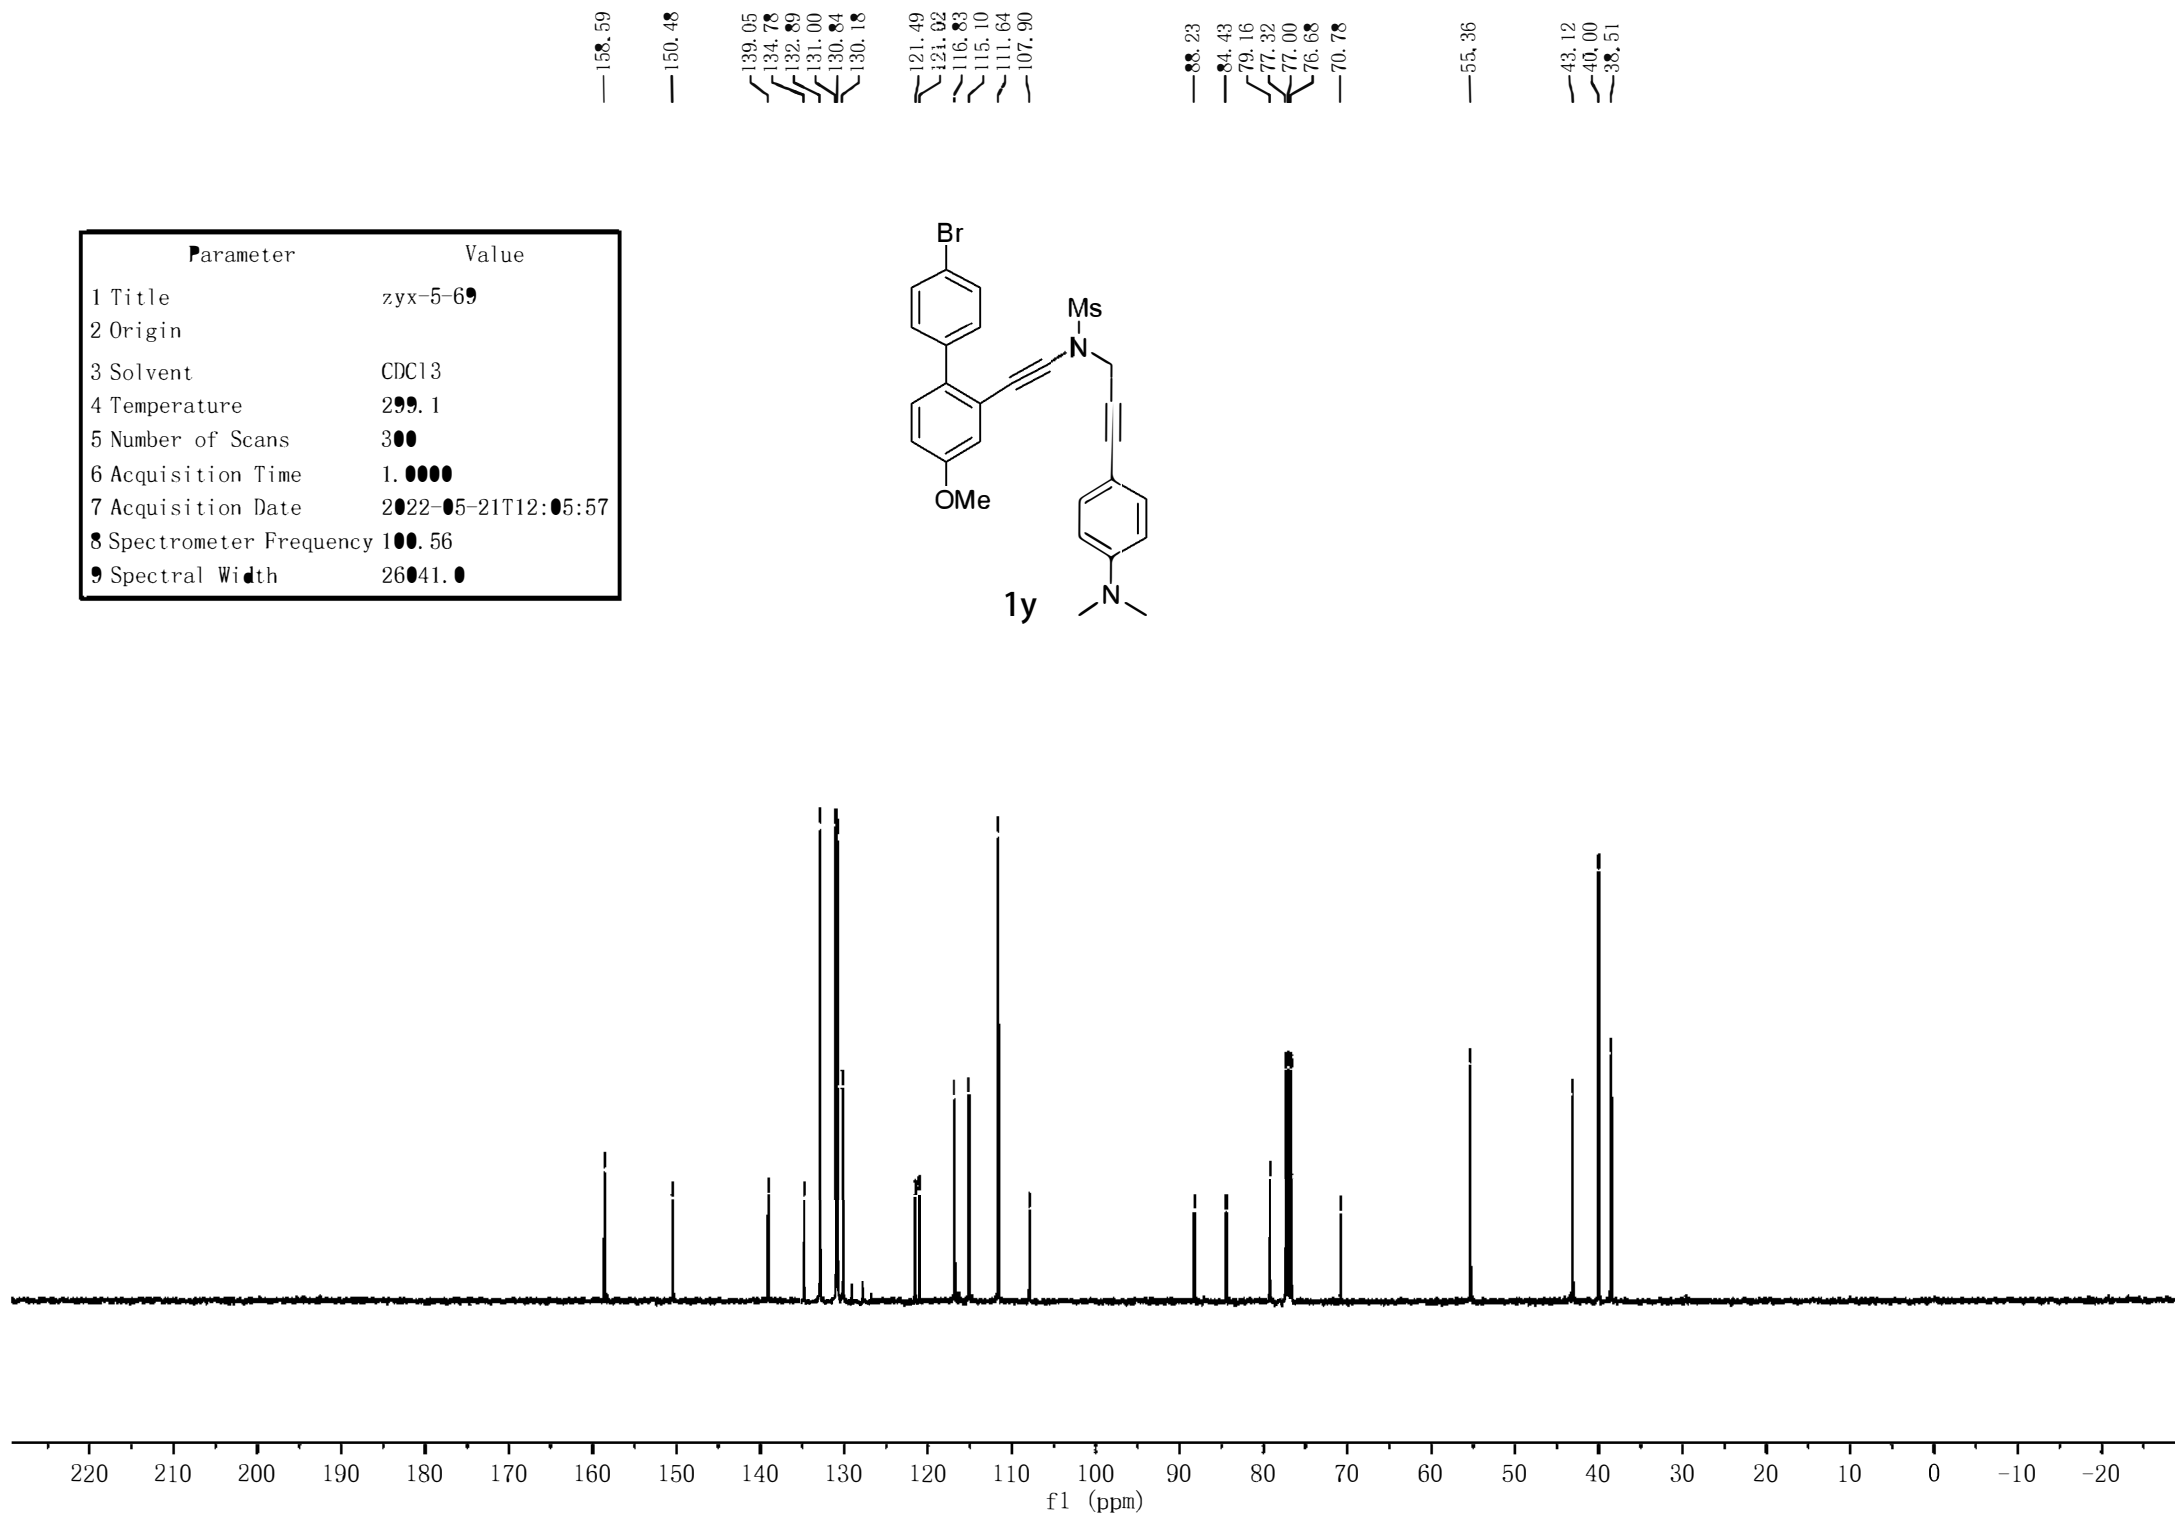

| Parameter                | Value               |
|--------------------------|---------------------|
| 1 Title                  | zyx-5-13-H          |
| 2 Origin                 | Bruker BioSpin GmbH |
| 3 Solvent                | CDC13               |
| 4 Temperature            | 295.2               |
| 5 Number of Scans        | 15                  |
| 6 Acquisition Time       | 3.9846              |
| 7 Acquisition Date       | 2022-04-26T15:27:13 |
| 8 Spectrometer Frequency | 399.93              |
| 9 Spectral Width         | 8223.7              |

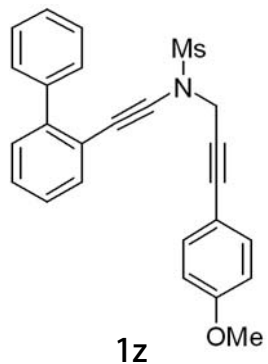

7.598  
7.581  
7.550  
7.532  
7.368  
7.334  
7.303  
7.268  
6.827  
6.805

4.433

3.764

2.917

0.000

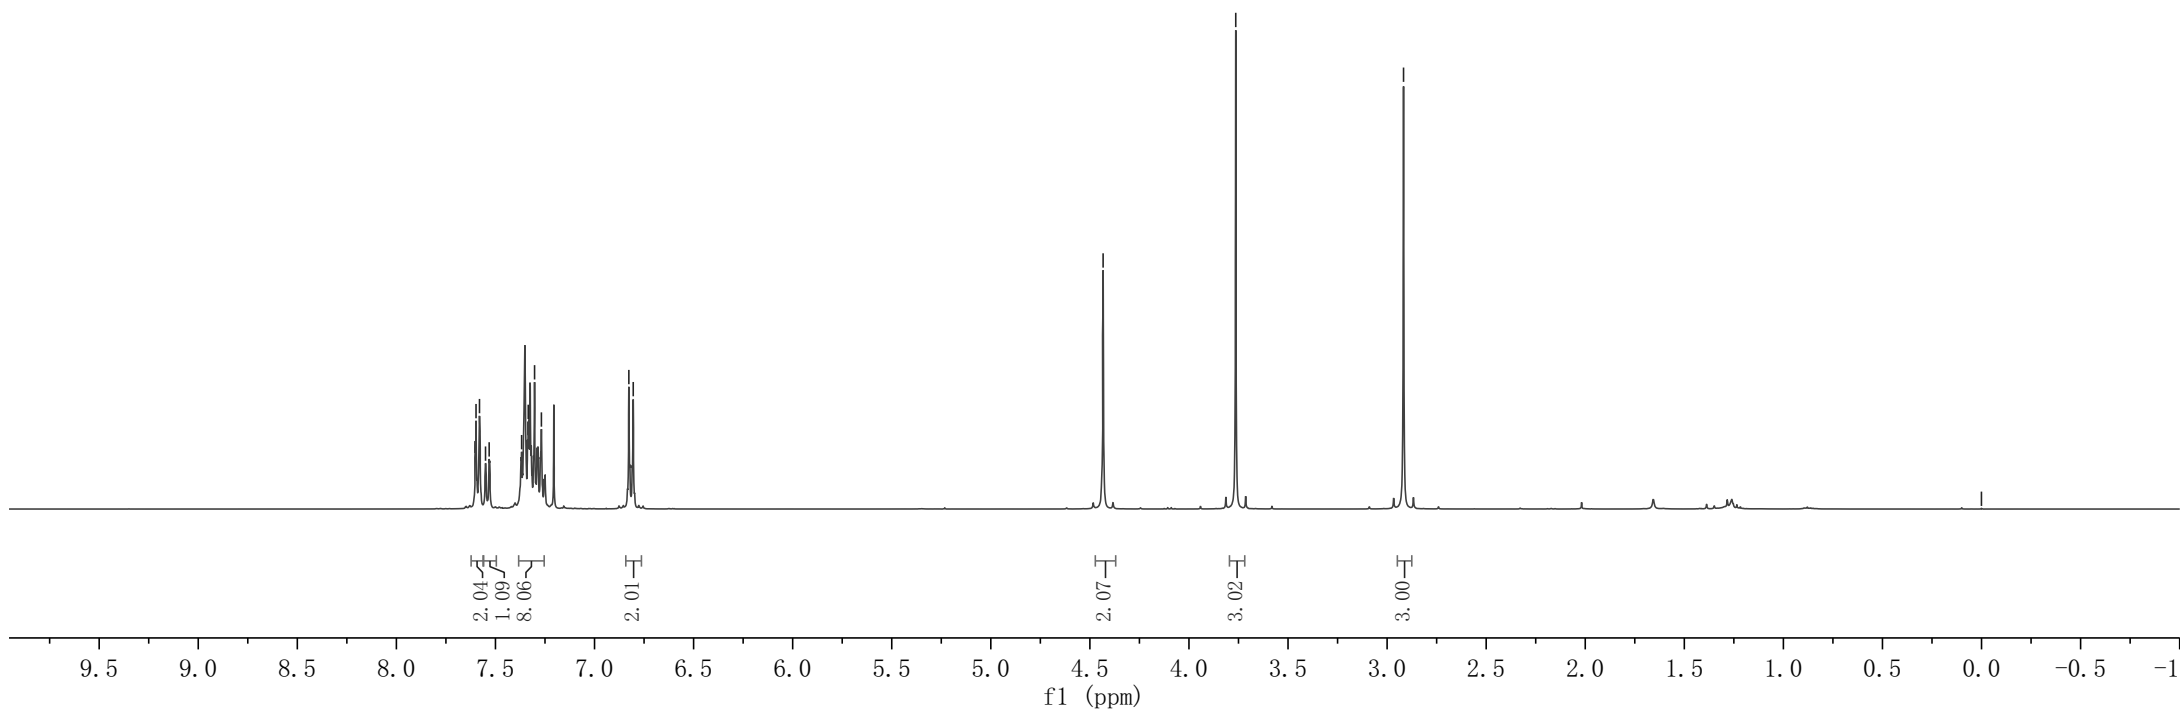

| Parameter                | Value               |
|--------------------------|---------------------|
| 1 Title                  | zyx-5-13-C          |
| 2 Origin                 | Bruker BioSpin GmbH |
| 3 Solvent                | CDC13               |
| 4 Temperature            | 295.5               |
| 5 Number of Scans        | 110                 |
| 6 Acquisition Time       | 1.3631              |
| 7 Acquisition Date       | 2022-04-26T15:28:43 |
| 8 Spectrometer Frequency | 100.56              |
| 9 Spectral Width         | 24038.5             |

160.02

143.47  
140.43  
133.24  
132.47  
129.26  
129.13  
127.92  
127.24  
126.96  
113.94  
113.56

86.71  
84.00  
80.19  
77.32  
77.00  
76.68  
71.01

55.17

42.76  
38.36

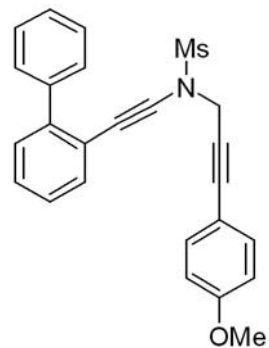

1z

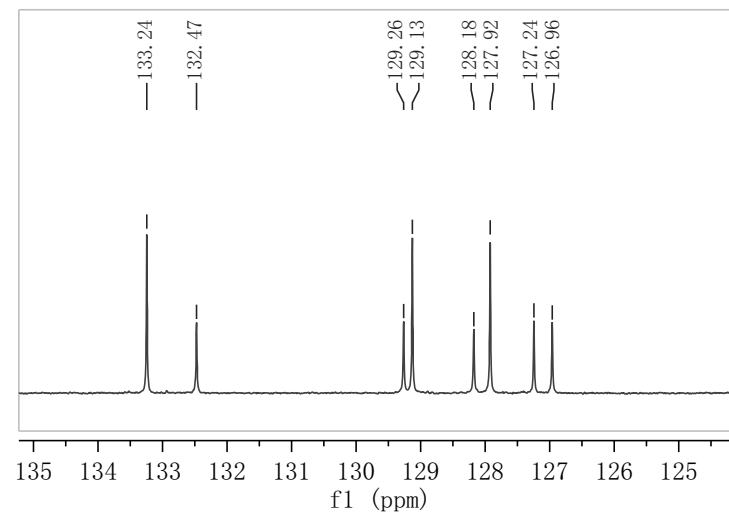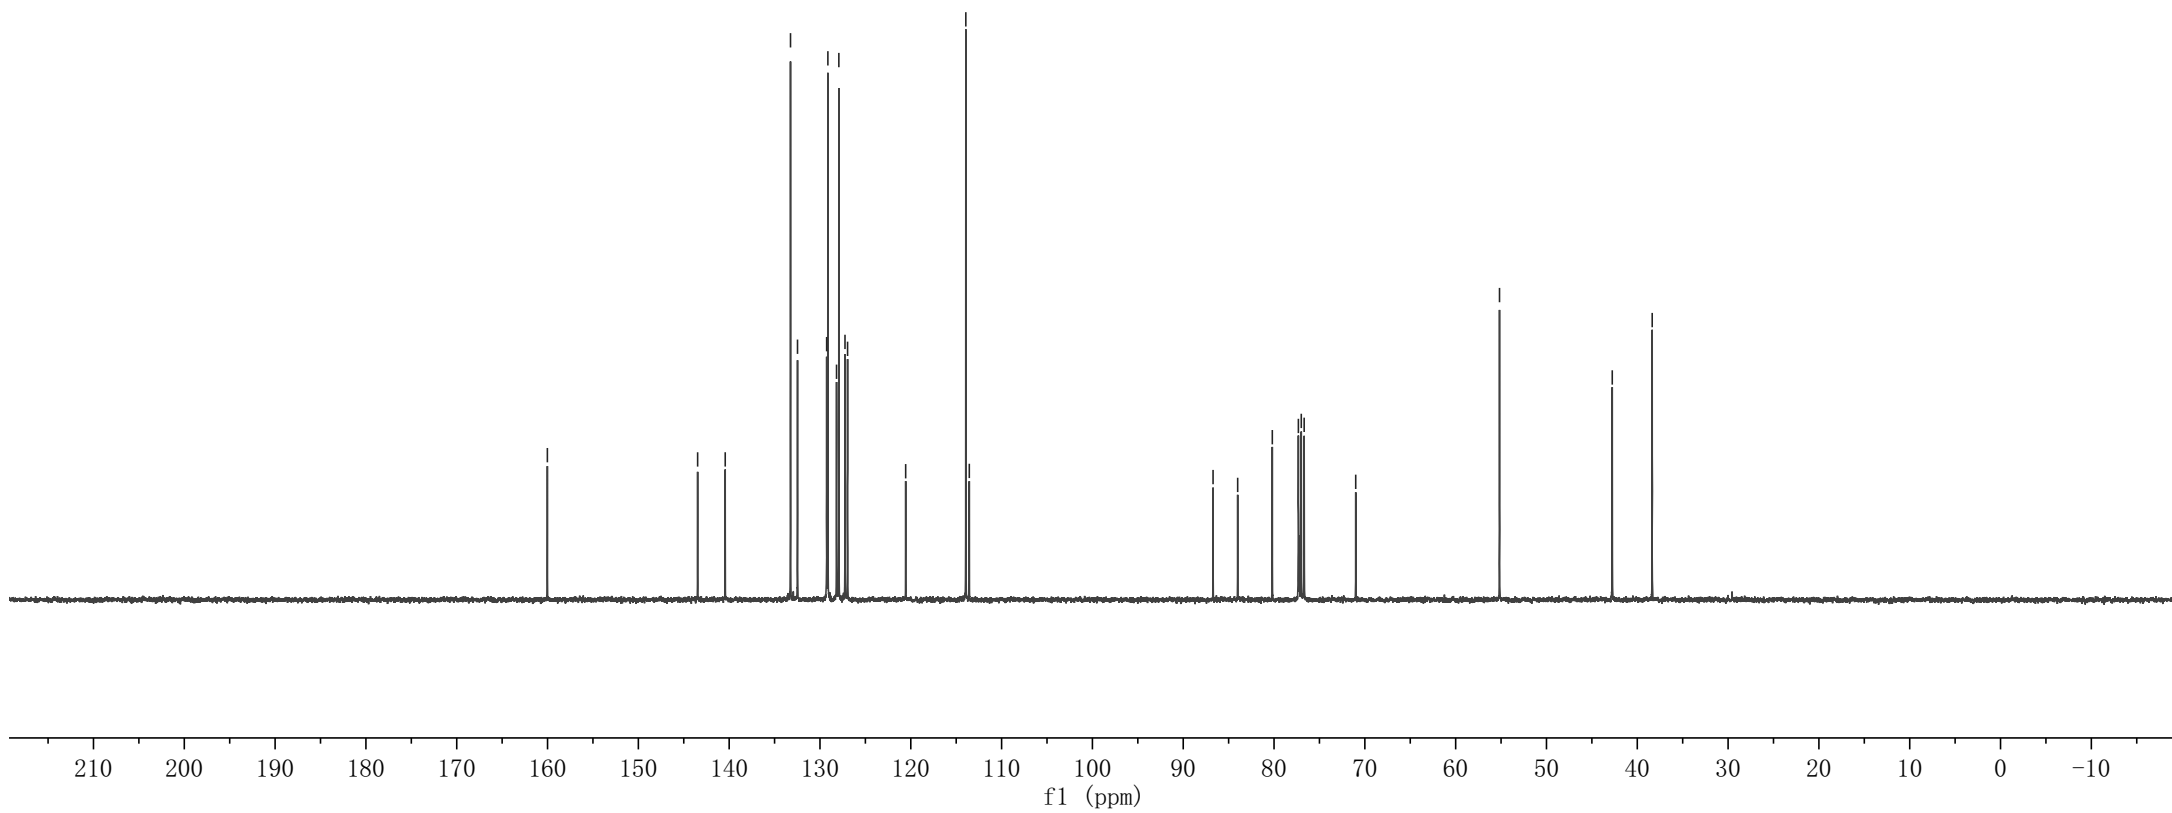



| Parameter                | Value               |
|--------------------------|---------------------|
| 1 Title                  | zyx-5-11-h          |
| 2 Origin                 | Bruker BioSpin GmbH |
| 3 Solvent                | CDCl3               |
| 4 Temperature            | 295.1               |
| 5 Number of Scans        | 15                  |
| 6 Acquisition Time       | 3.9846              |
| 7 Acquisition Date       | 2022-04-26T15:16:02 |
| 8 Spectrometer Frequency | 399.93              |
| 9 Spectral Width         | 8223.7              |

7.541  
7.522  
7.512  
7.492  
7.368  
7.321  
7.293  
7.270  
7.248  
7.234  
7.170  
7.150  
6.829  
6.807

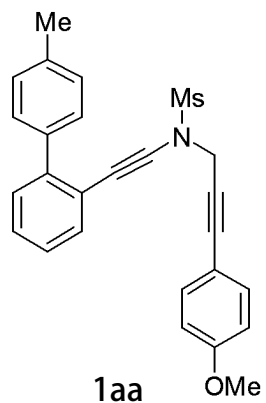

4.449  
3.771  
2.953  
2.300  
0.000

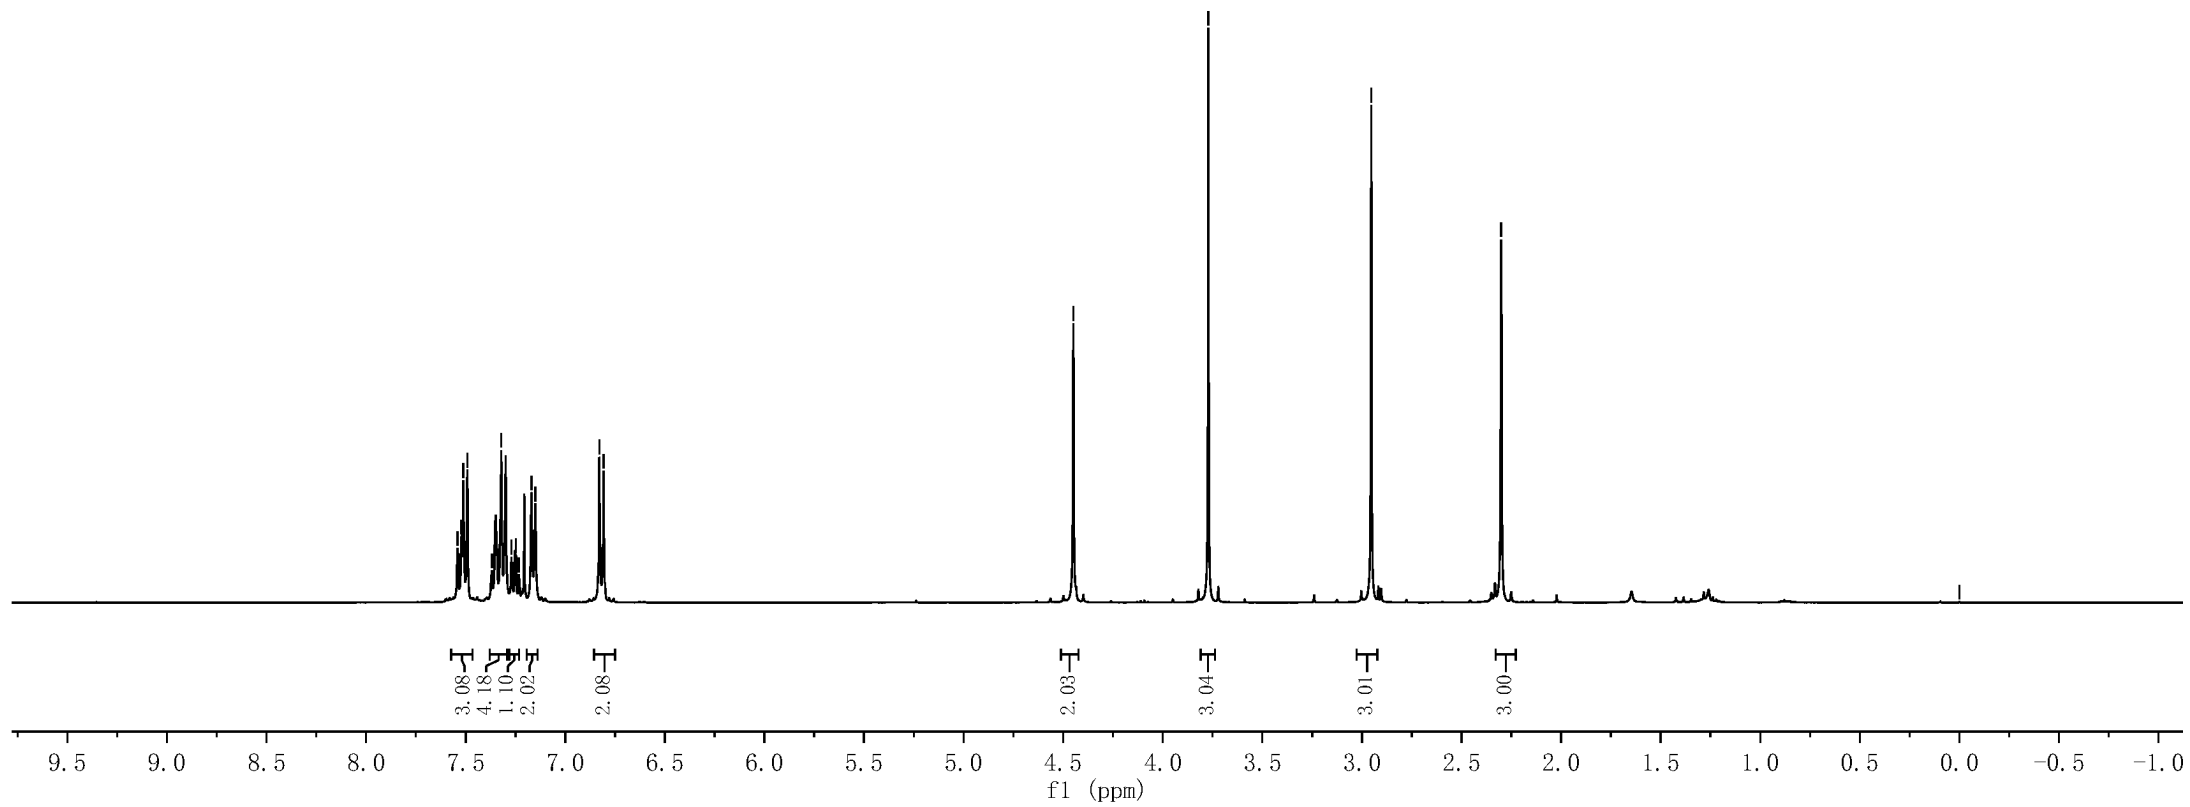

| Parameter                | Value               |
|--------------------------|---------------------|
| 1 Title                  | zyx-5-11-c          |
| 2 Origin                 | Bruker BioSpin GmbH |
| 3 Solvent                | CDCl3               |
| 4 Temperature            | 295.4               |
| 5 Number of Scans        | 55                  |
| 6 Acquisition Time       | 1.3631              |
| 7 Acquisition Date       | 2022-04-26T15:19:46 |
| 8 Spectrometer Frequency | 100.56              |
| 9 Spectral Width         | 24038.5             |

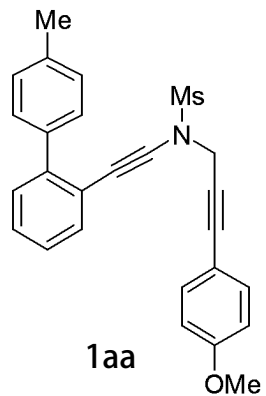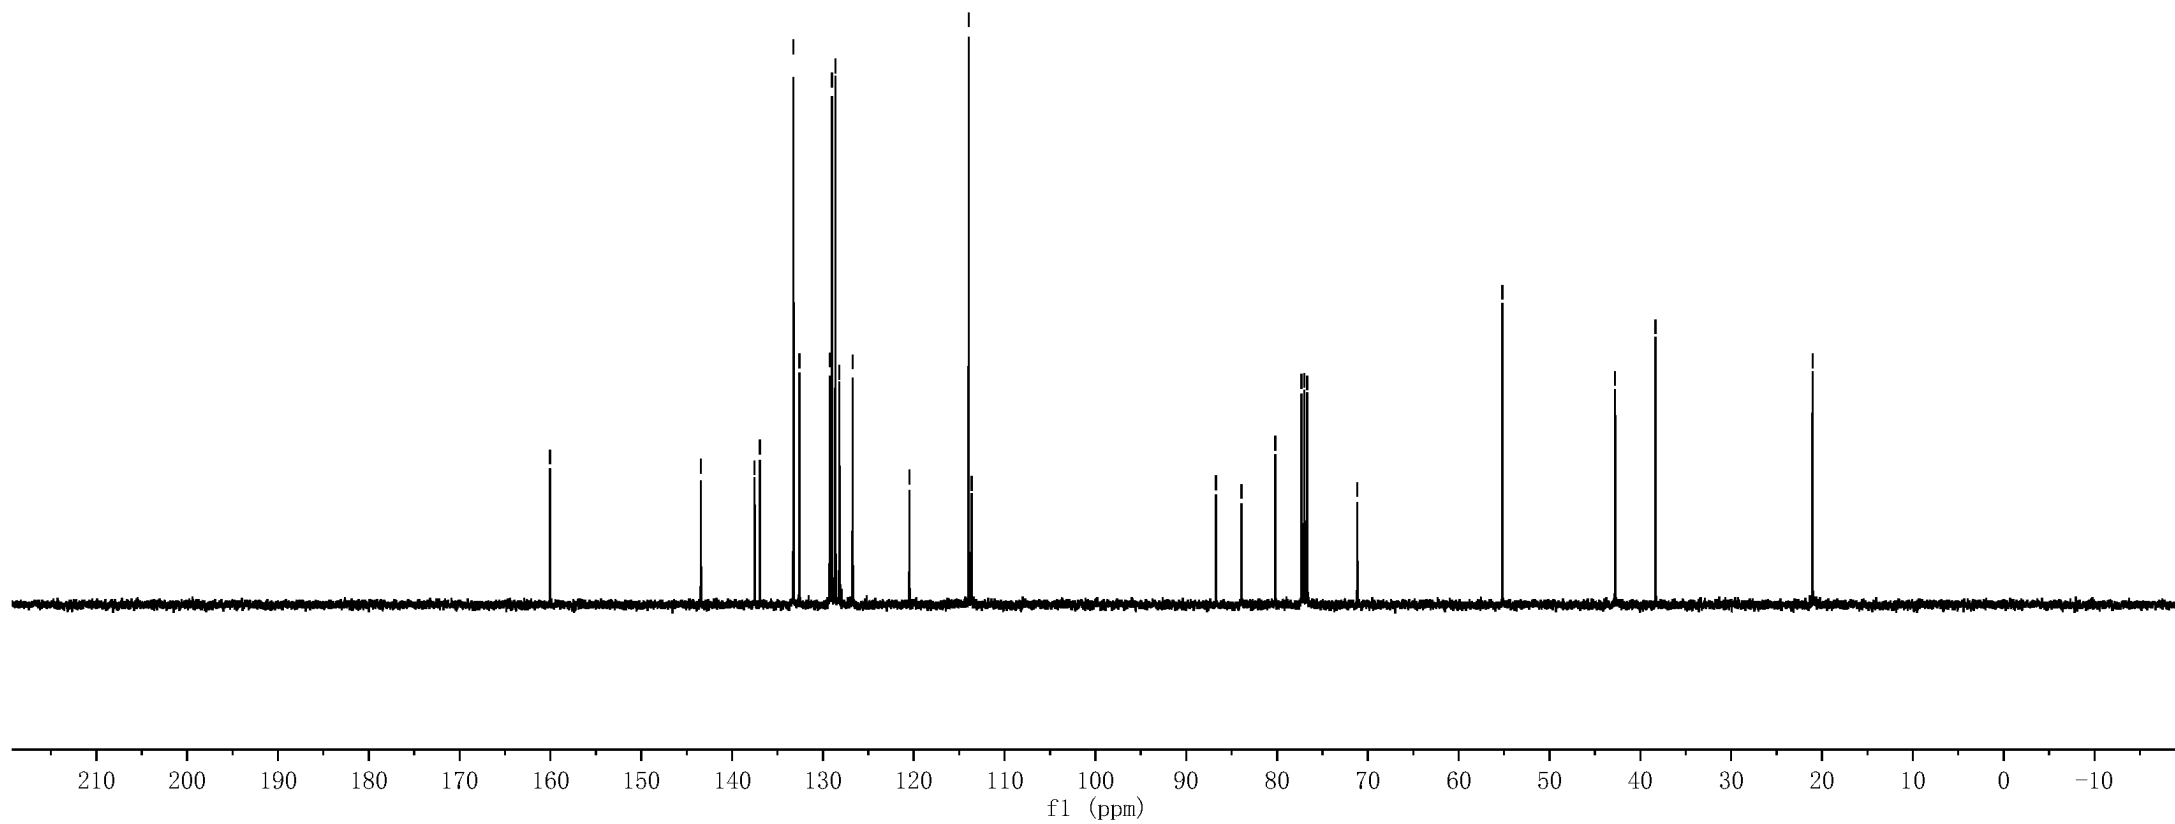

160.03  
 143.43  
 136.95  
 133.25  
 132.60  
 129.24  
 129.00  
 128.63  
 128.19  
 126.73  
 113.95  
 113.61

86.72  
 83.93  
 80.21  
 77.32  
 77.00  
 76.68  
 71.17

55.19  
 42.78  
 38.34  
 21.04

137.53  
 136.95  
 133.25  
 132.60  
 129.24  
 129.00  
 128.63  
 128.19  
 126.73

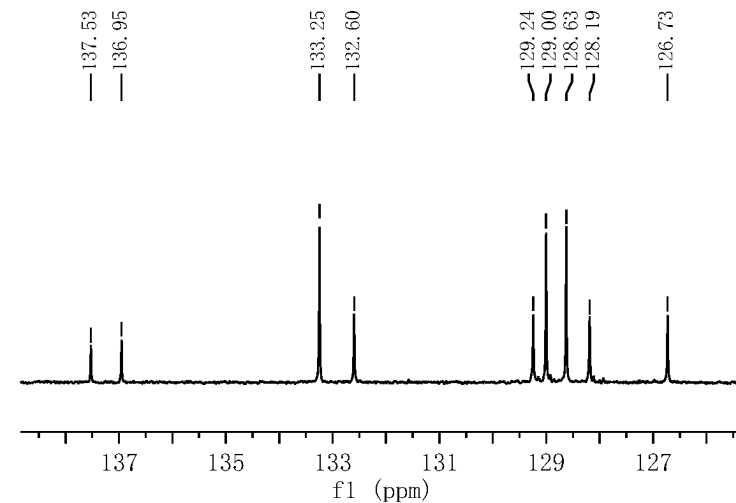

| Parameter                | Value               |
|--------------------------|---------------------|
| 1 Title                  | zyx-5-168--h        |
| 2 Origin                 | Bruker BioSpin GmbH |
| 3 Solvent                | CDCl3               |
| 4 Temperature            | 298.0               |
| 5 Number of Scans        | 12                  |
| 6 Acquisition Time       | 4.0894              |
| 7 Acquisition Date       | 2022-06-29T15:46:51 |
| 8 Spectrometer Frequency | 400.13              |
| 9 Spectral Width         | 8012.8              |

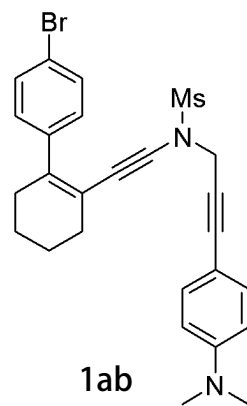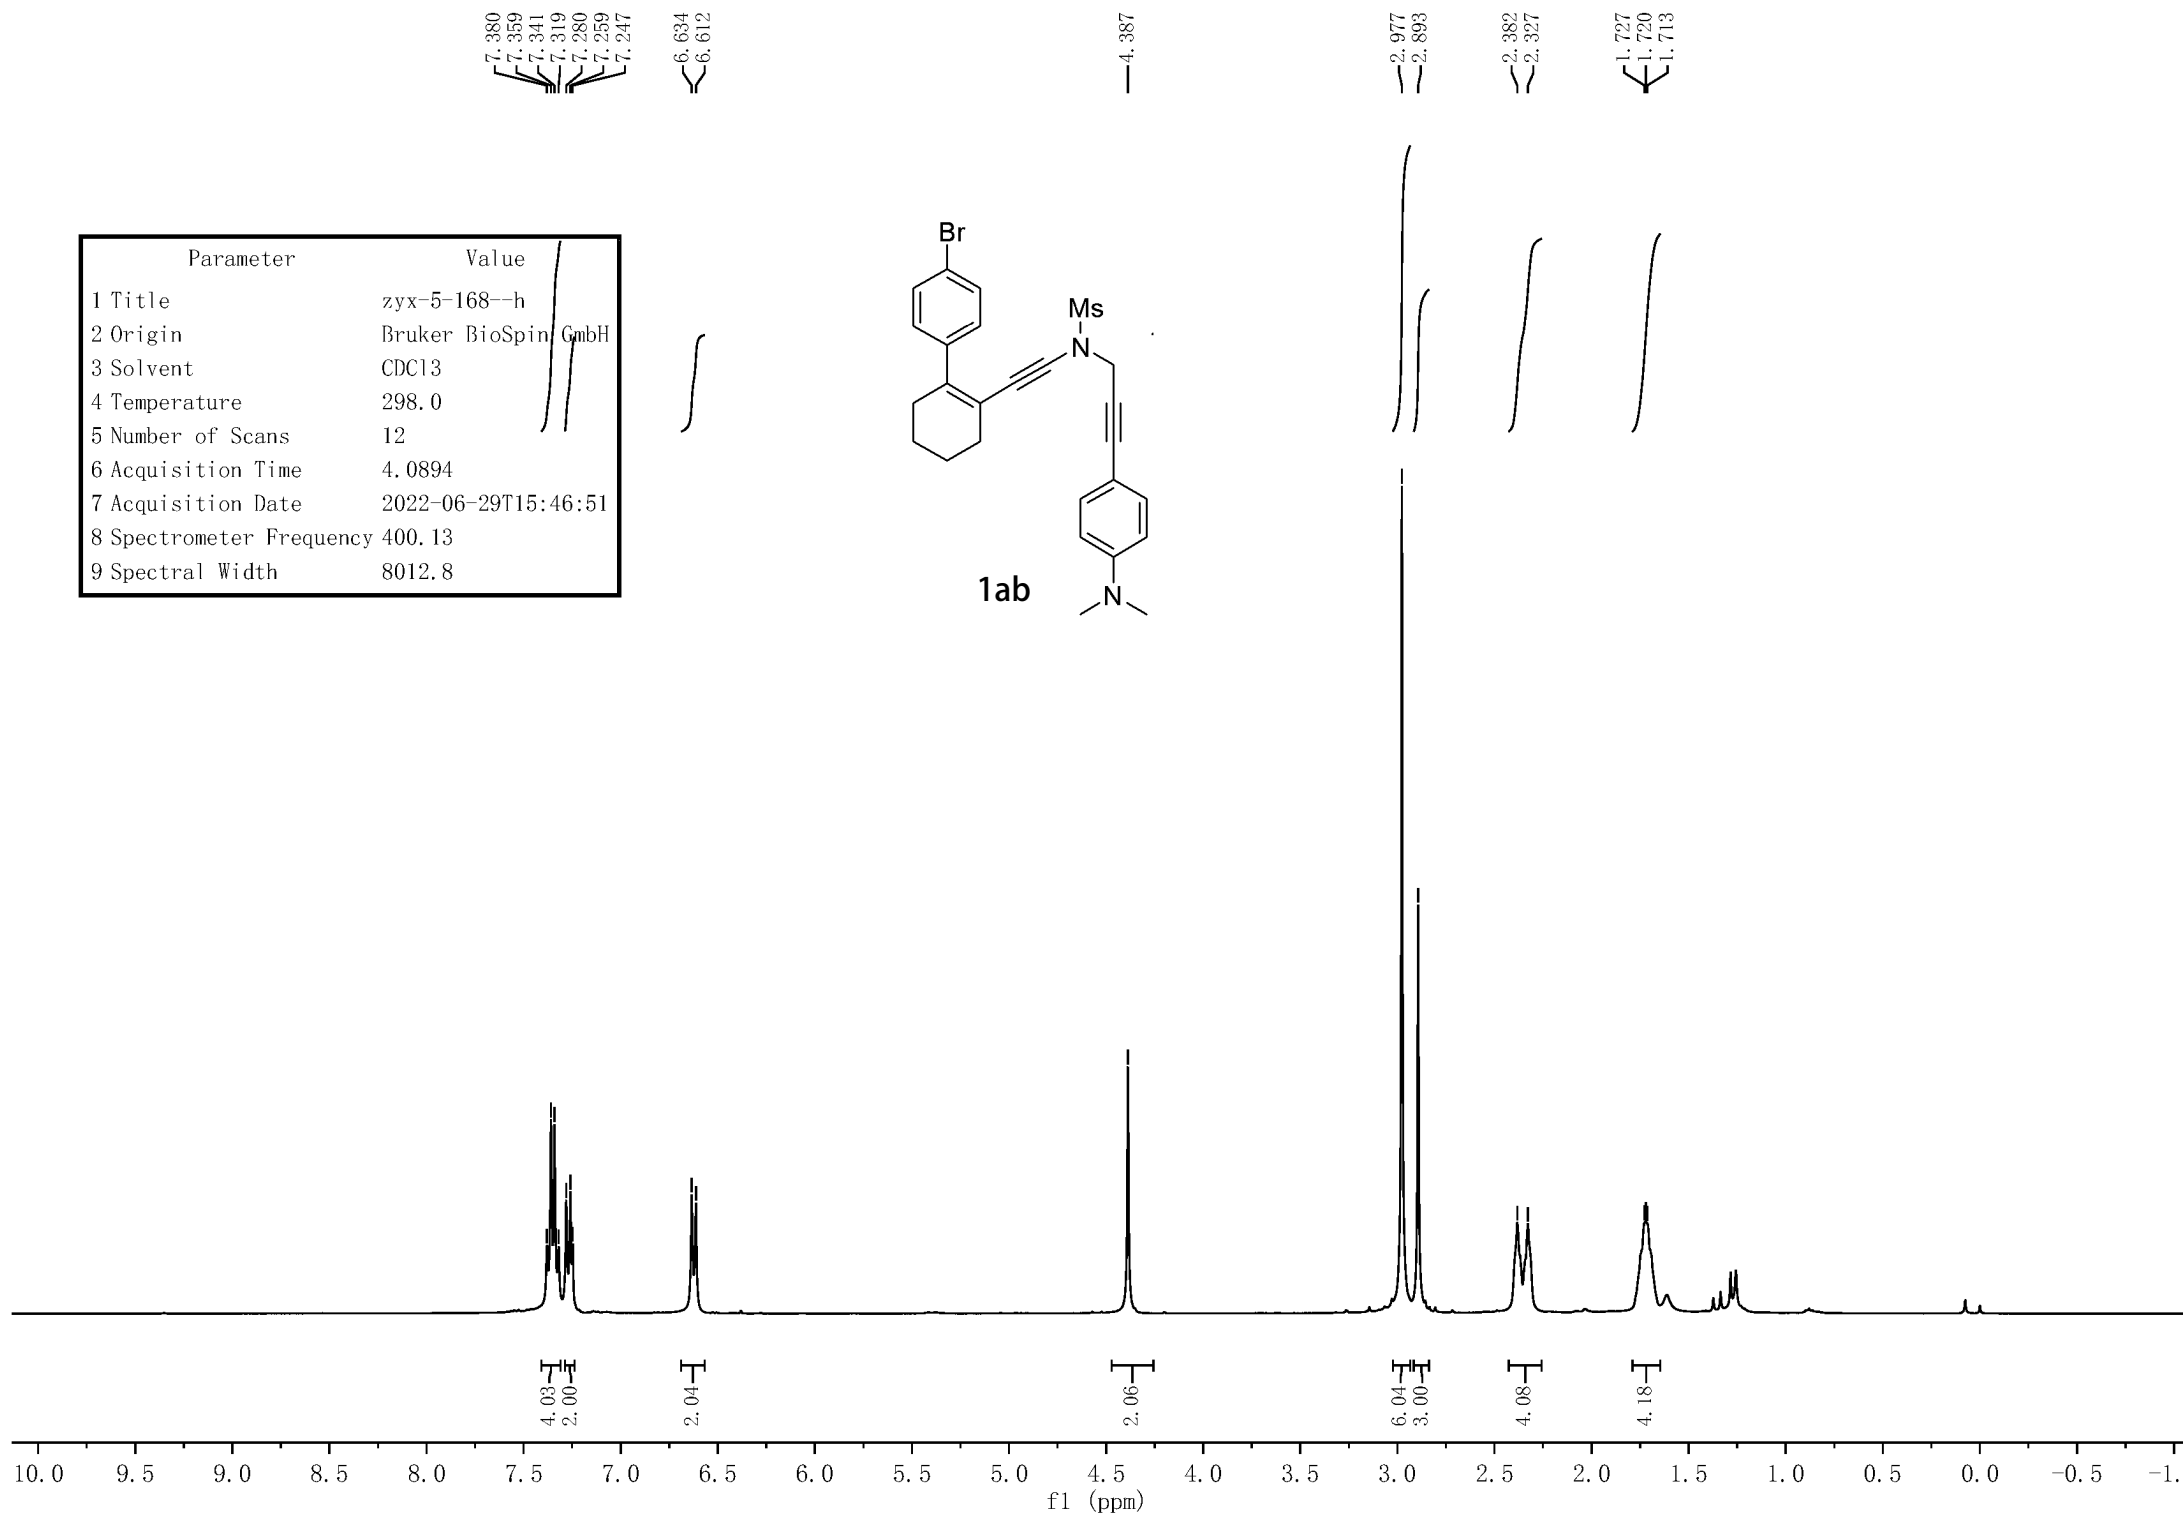

| Parameter                | Value               |
|--------------------------|---------------------|
| 1 Title                  | zyx-5-168--c        |
| 2 Origin                 | Bruker BioSpin GmbH |
| 3 Solvent                | CDCl3               |
| 4 Temperature            | 300.0               |
| 5 Number of Scans        | 66                  |
| 6 Acquisition Time       | 1.3631              |
| 7 Acquisition Date       | 2022-06-29T15:49:21 |
| 8 Spectrometer Frequency | 100.61              |
| 9 Spectral Width         | 24038.5             |

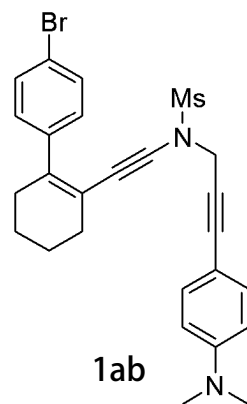

150.51  
 141.95  
 141.55  
 132.91  
 130.86  
 129.58  
 120.63  
 116.44  
 111.72  
 108.21  
 87.91  
 83.37  
 79.36  
 77.32  
 77.00  
 76.68  
 72.48  
 43.15  
 40.08  
 38.02  
 30.87  
 30.60  
 22.51  
 22.15

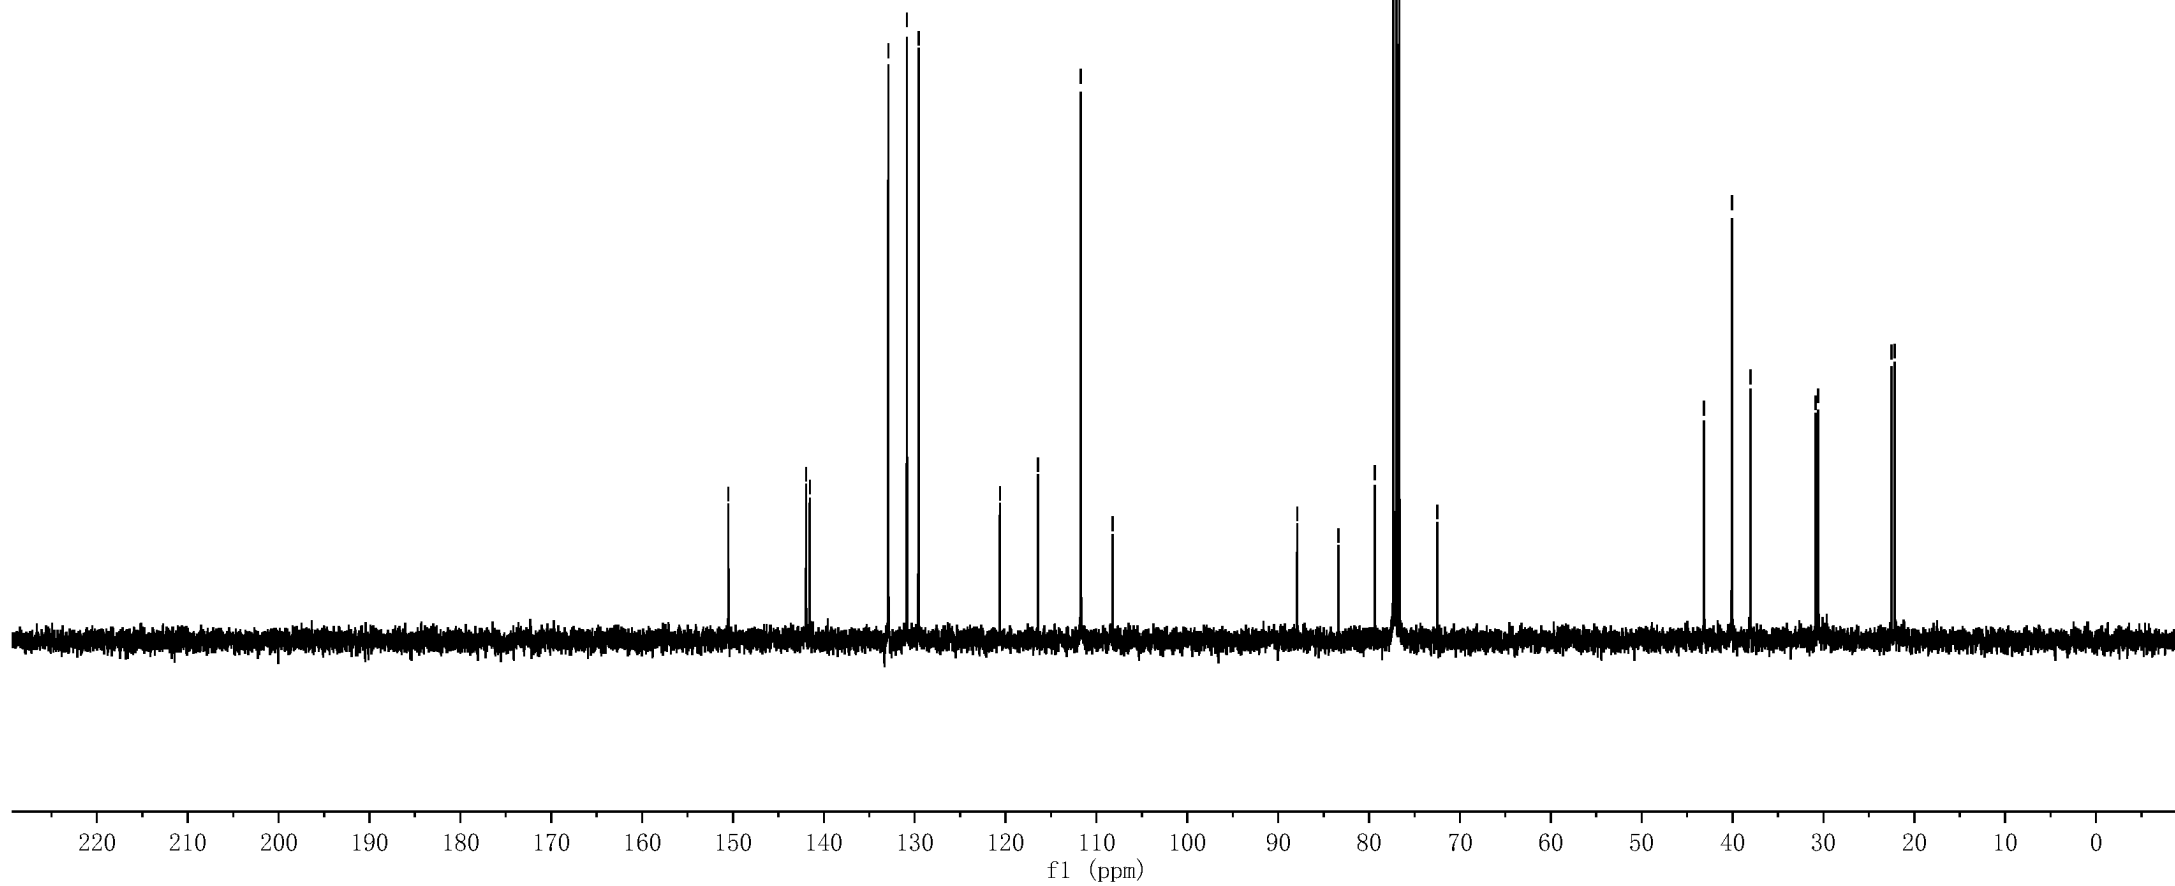

| Parameter                | Value               |
|--------------------------|---------------------|
| 1 Title                  | zyx-4-232-1         |
| 2 Origin                 | Bruker Biospin GmbH |
| 3 Solvent                | CDCl3               |
| 4 Temperature            | 294.9               |
| 5 Number of Scans        | 15                  |
| 6 Acquisition Time       | 3.9846              |
| 7 Acquisition Date       | 2022-04-19T16:39:47 |
| 8 Spectrometer Frequency | 399.93              |
| 9 Spectral Width         | 8223.7              |

7.552  
7.551  
7.532  
7.466  
7.463  
7.449  
7.393  
7.335  
7.312  
7.290

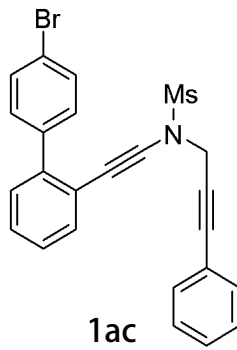

4.475

2.983

0.000

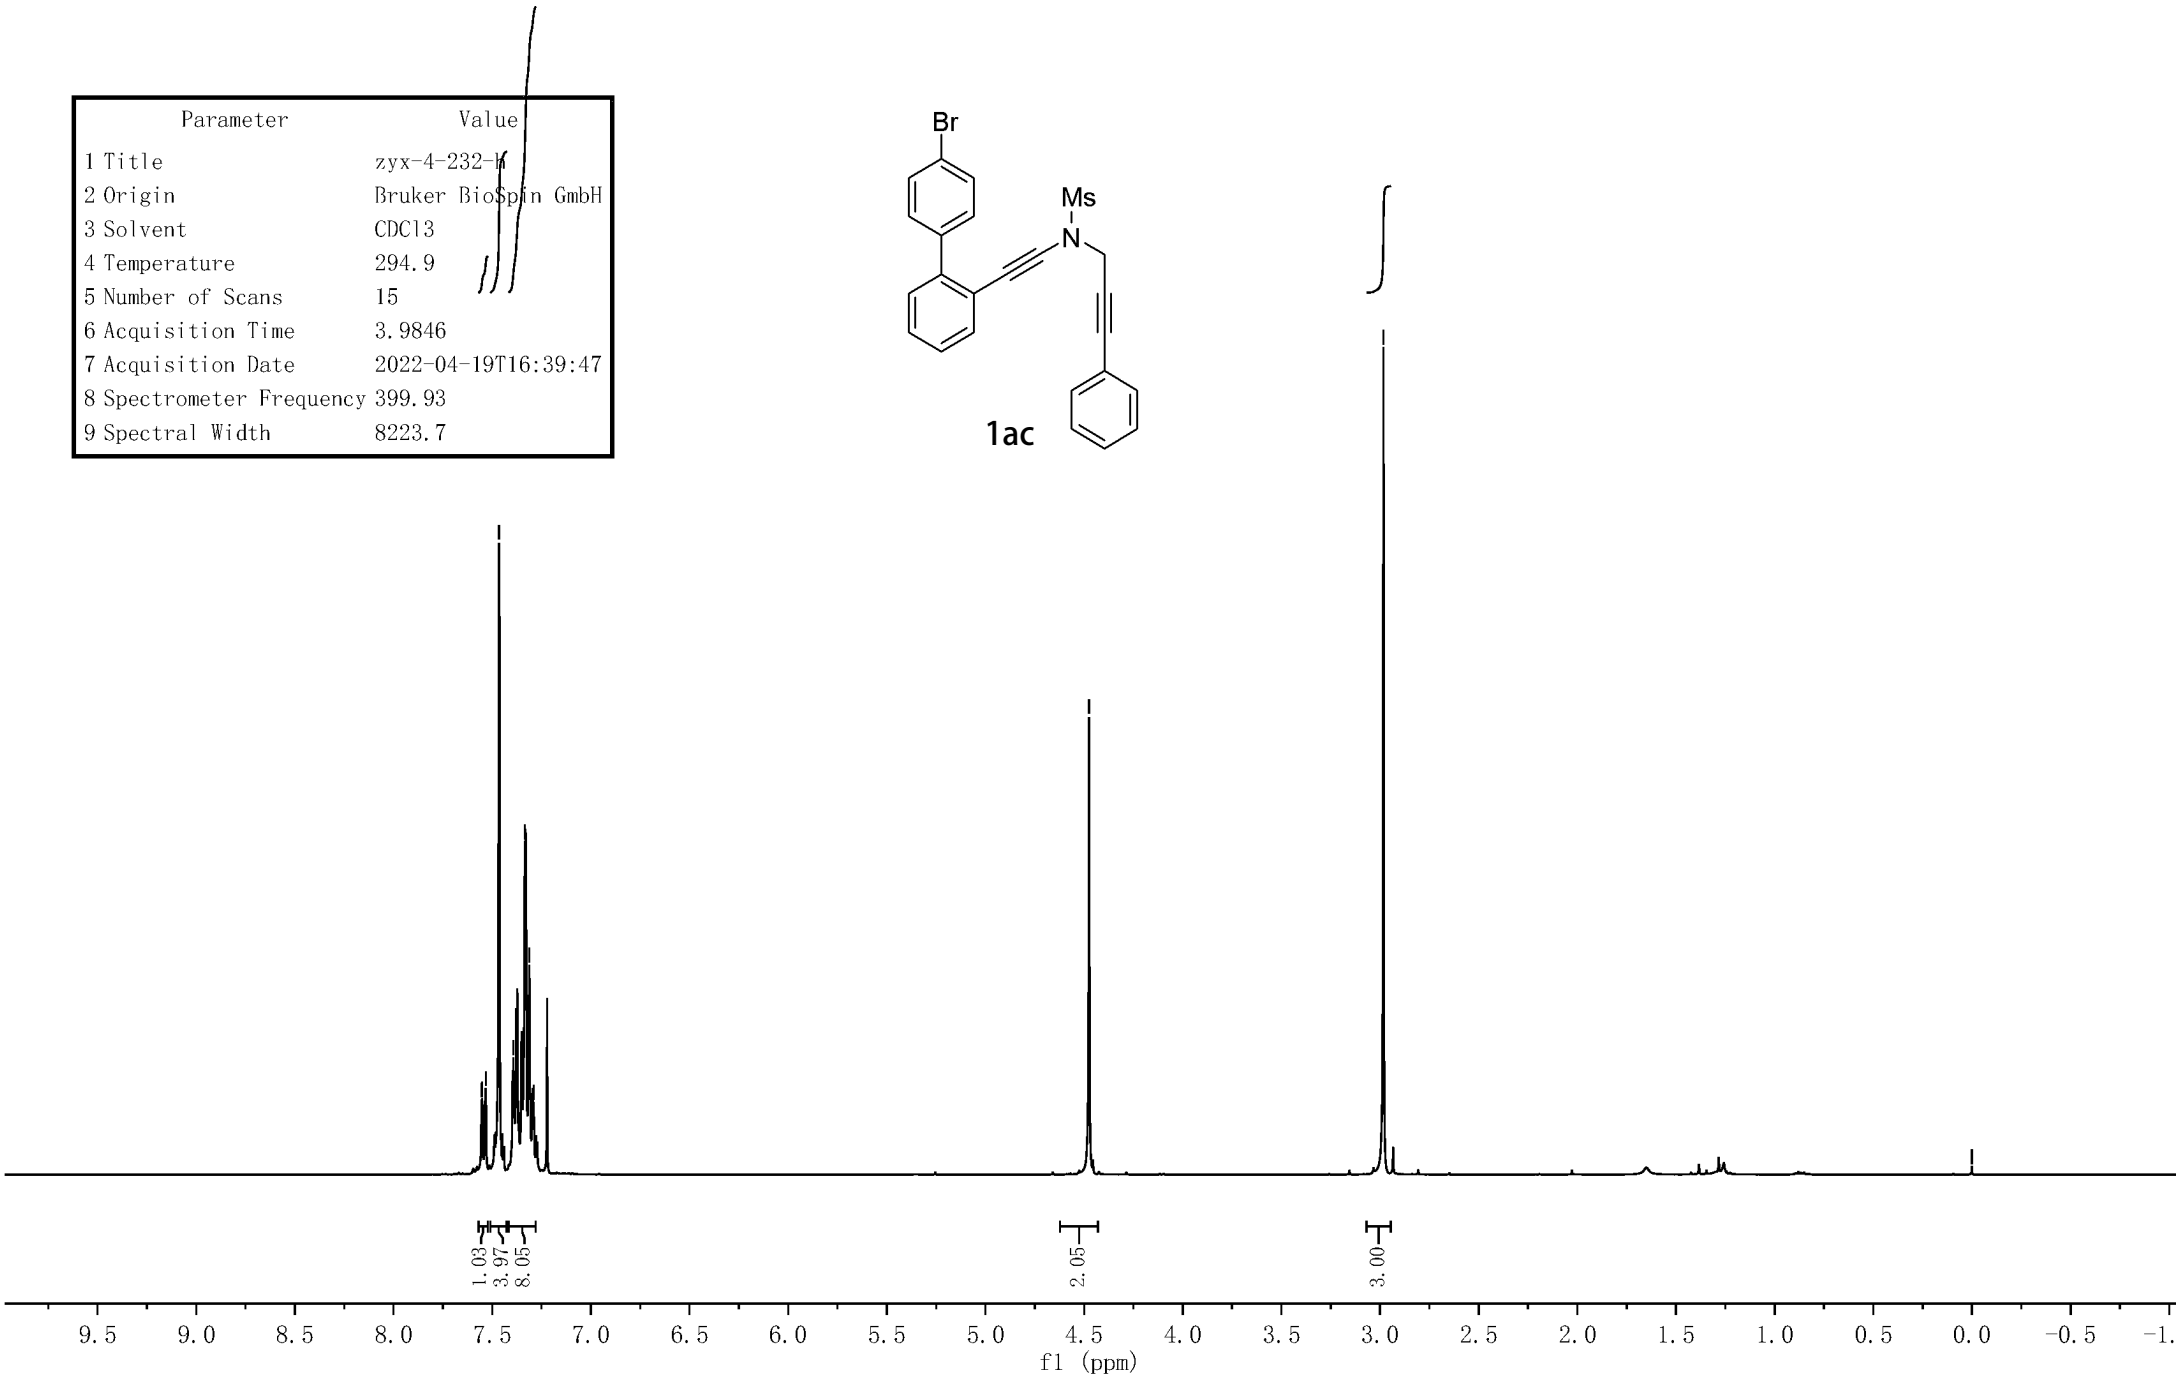

| Parameter                | Value               |
|--------------------------|---------------------|
| 1 Title                  | zyx-4-232-c         |
| 2 Origin                 | Bruker BioSpin GmbH |
| 3 Solvent                | CDCl3               |
| 4 Temperature            | 295.3               |
| 5 Number of Scans        | 40                  |
| 6 Acquisition Time       | 1.3631              |
| 7 Acquisition Date       | 2022-04-19T16:43:28 |
| 8 Spectrometer Frequency | 100.56              |
| 9 Spectral Width         | 24038.5             |

142.11  
139.28  
131.70  
131.06  
130.84  
129.03  
128.43  
127.57  
121.48  
120.46

86.81  
84.28  
81.44  
77.32  
77.00  
76.68  
70.83

42.62  
38.45

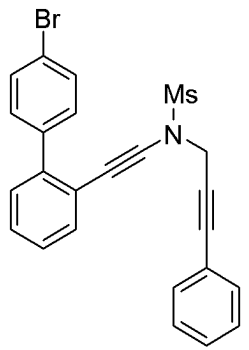

1ac

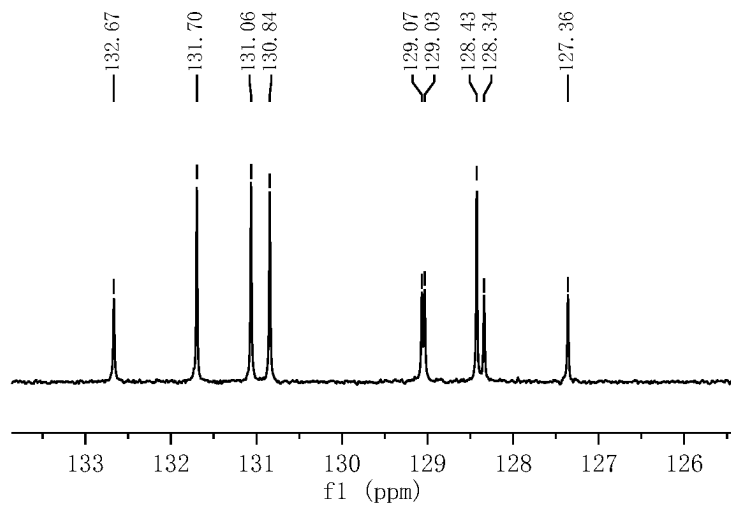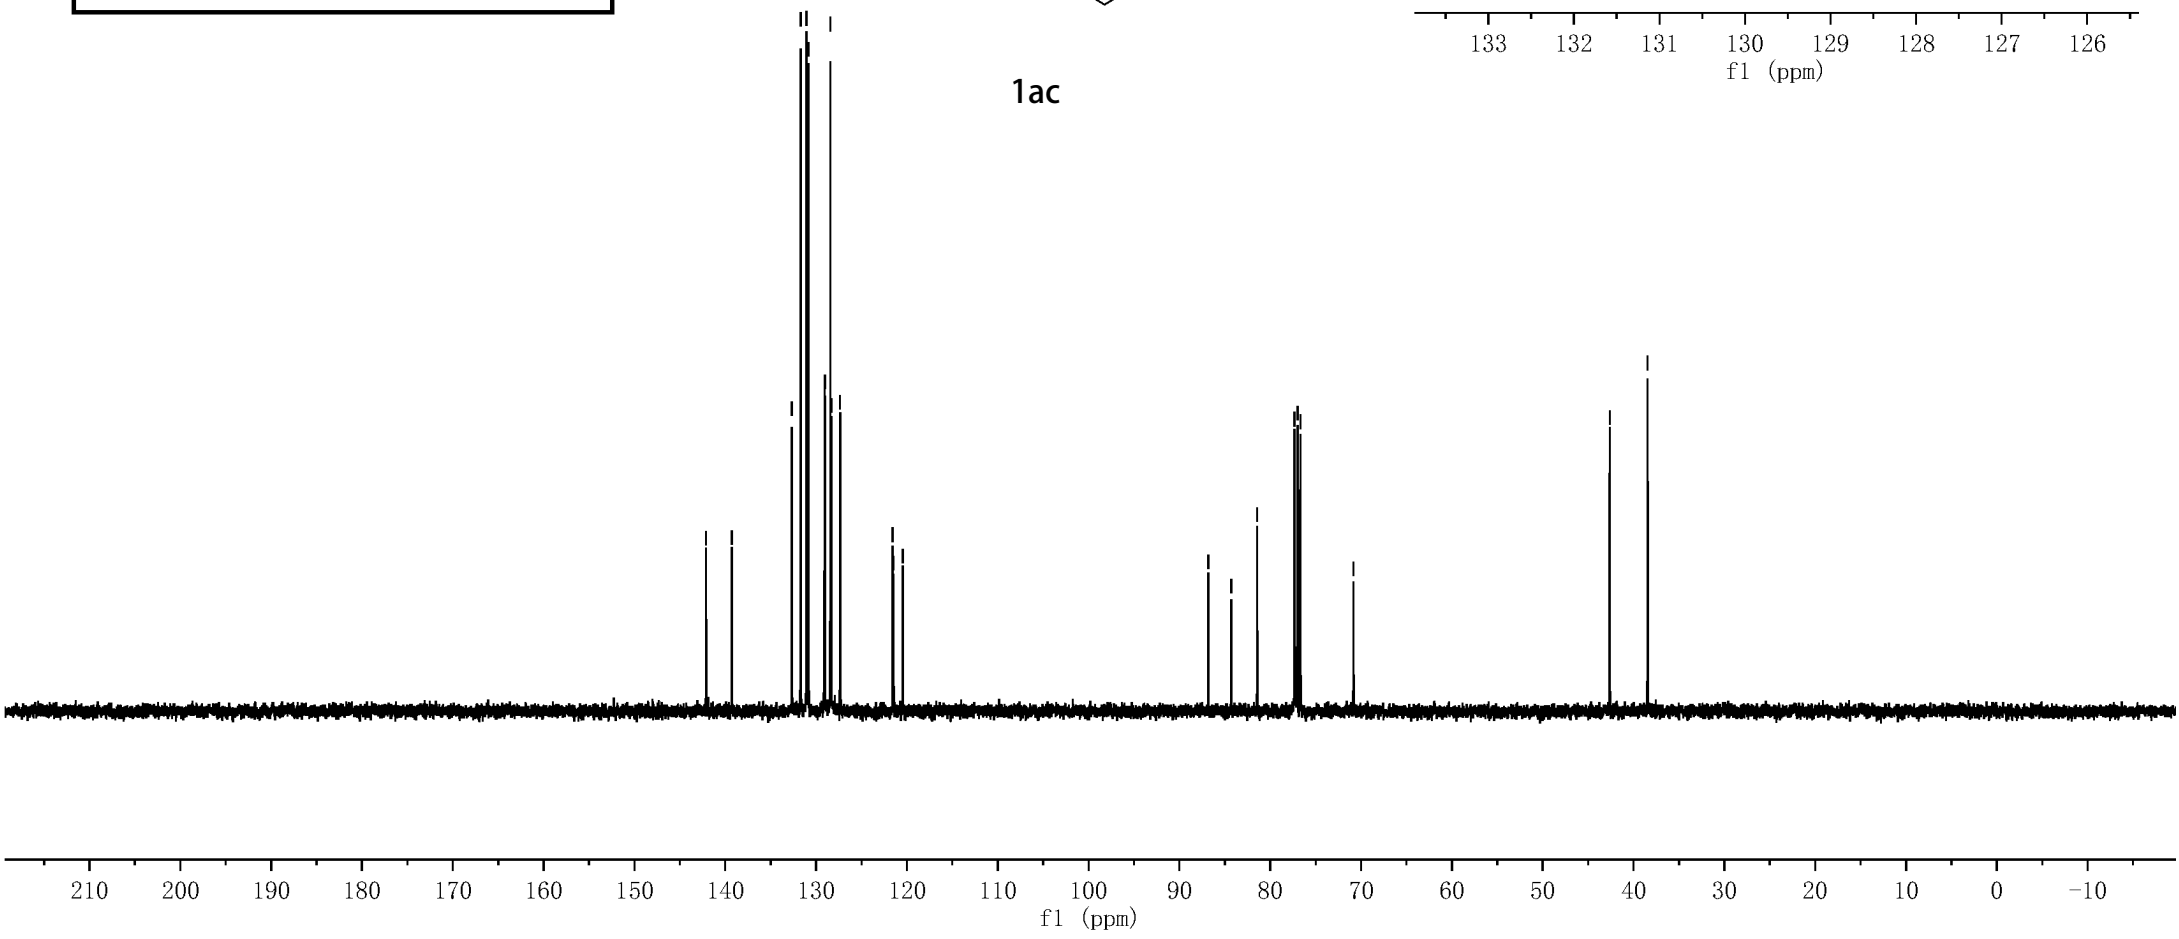

| Parameter                | Value               |
|--------------------------|---------------------|
| 1 Title                  | zyx-4-242-H         |
| 2 Origin                 | Bruker BioSpir GmbH |
| 3 Solvent                | CDCl3               |
| 4 Temperature            | 295.3               |
| 5 Number of Scans        | 6                   |
| 6 Acquisition Time       | 3.9846              |
| 7 Acquisition Date       | 2022-04-21T21:25:26 |
| 8 Spectrometer Frequency | 399.93              |
| 9 Spectral Width         | 8223.7              |

7.545  
7.527  
7.487  
7.460  
7.444  
7.358  
7.339  
7.311  
7.291

4.470

2.977

0.000

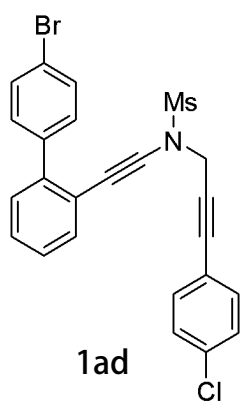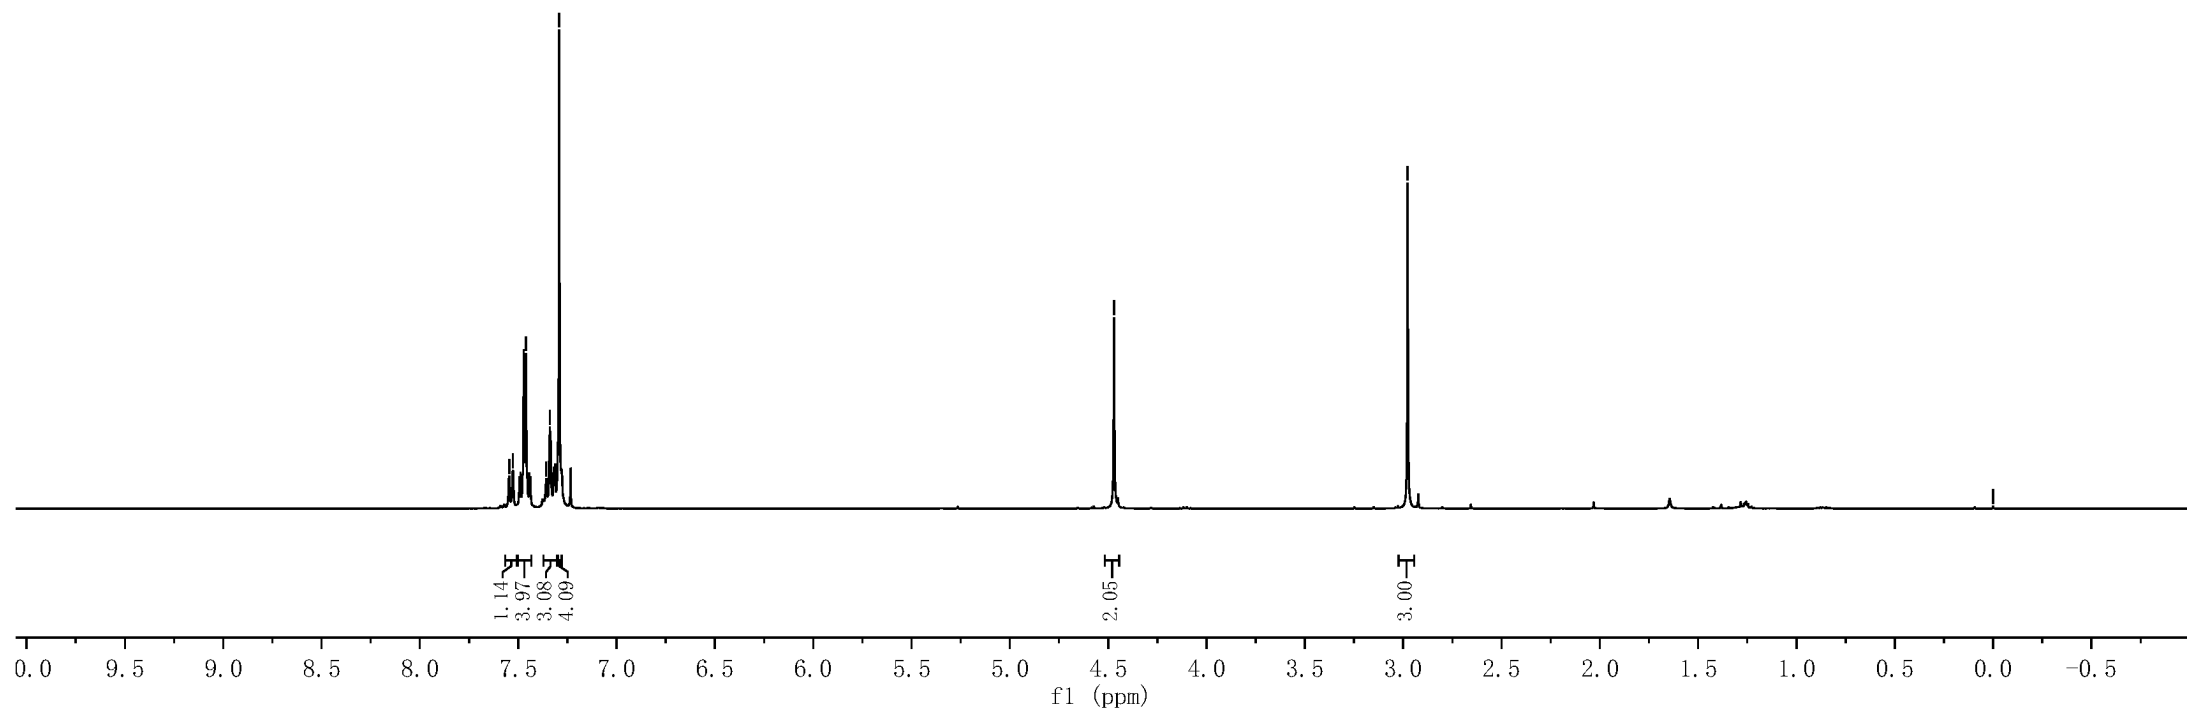

| Parameter                | Value               |
|--------------------------|---------------------|
| 1 Title                  | zyx-4-242-C         |
| 2 Origin                 | Bruker BioSpin GmbH |
| 3 Solvent                | CDCl3               |
| 4 Temperature            | 295.5               |
| 5 Number of Scans        | 24                  |
| 6 Acquisition Time       | 1.3631              |
| 7 Acquisition Date       | 2022-04-21T21:26:23 |
| 8 Spectrometer Frequency | 100.56              |
| 9 Spectral Width         | 24038.5             |

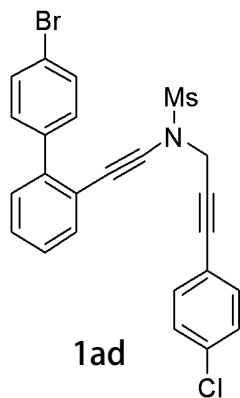

142.07  
139.27  
135.12  
132.93  
132.65  
131.06  
130.82  
129.09  
128.76  
128.39  
127.38  
121.58  
120.38  
119.94

85.62  
84.14  
82.45  
77.32  
77.00  
76.68  
70.95

42.48  
38.47

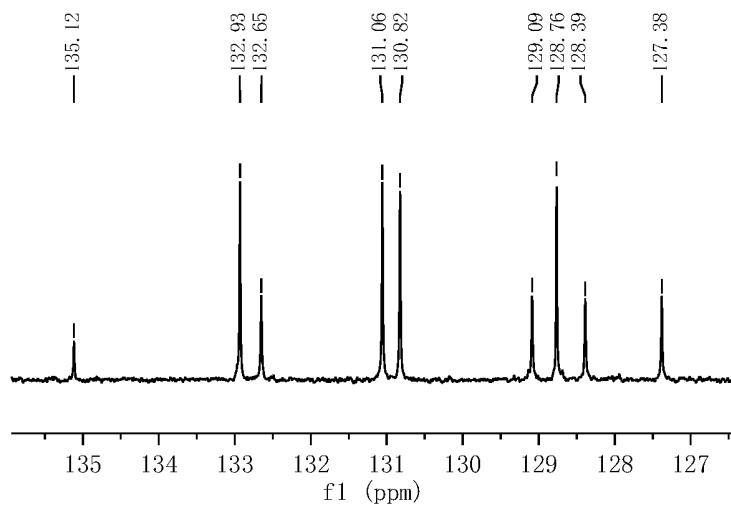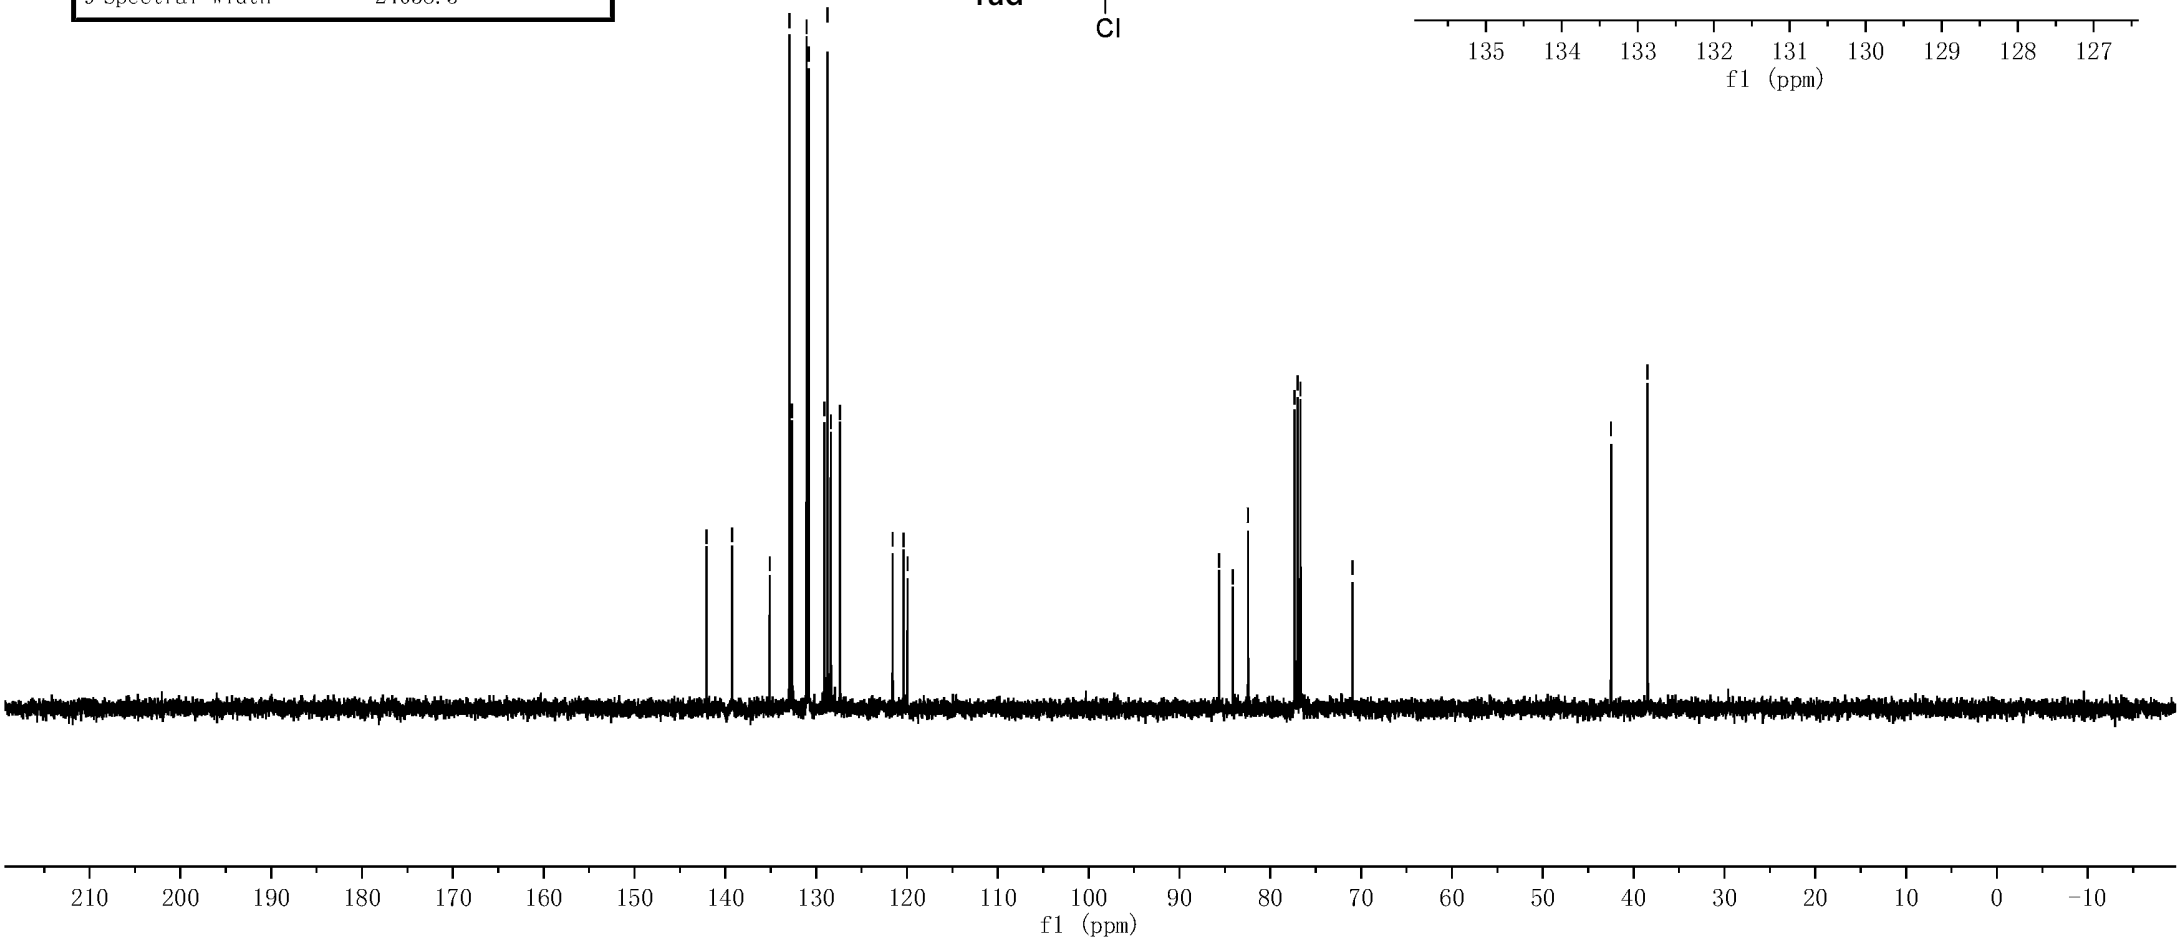



| Parameter                | Value               |
|--------------------------|---------------------|
| 1 Title                  | ZYX-13-60-C         |
| 2 Origin                 | Bruker BioSpin GmbH |
| 3 Solvent                | CDC13               |
| 4 Temperature            | 300.0               |
| 5 Number of Scans        | 3                   |
| 6 Acquisition Time       | 3.1719              |
| 7 Acquisition Date       | 2024-05-16T16:44:23 |
| 8 Spectrometer Frequency | 500.17              |
| 9 Spectral Width         | 10330.6             |

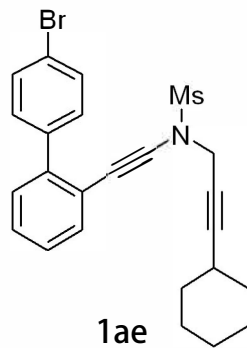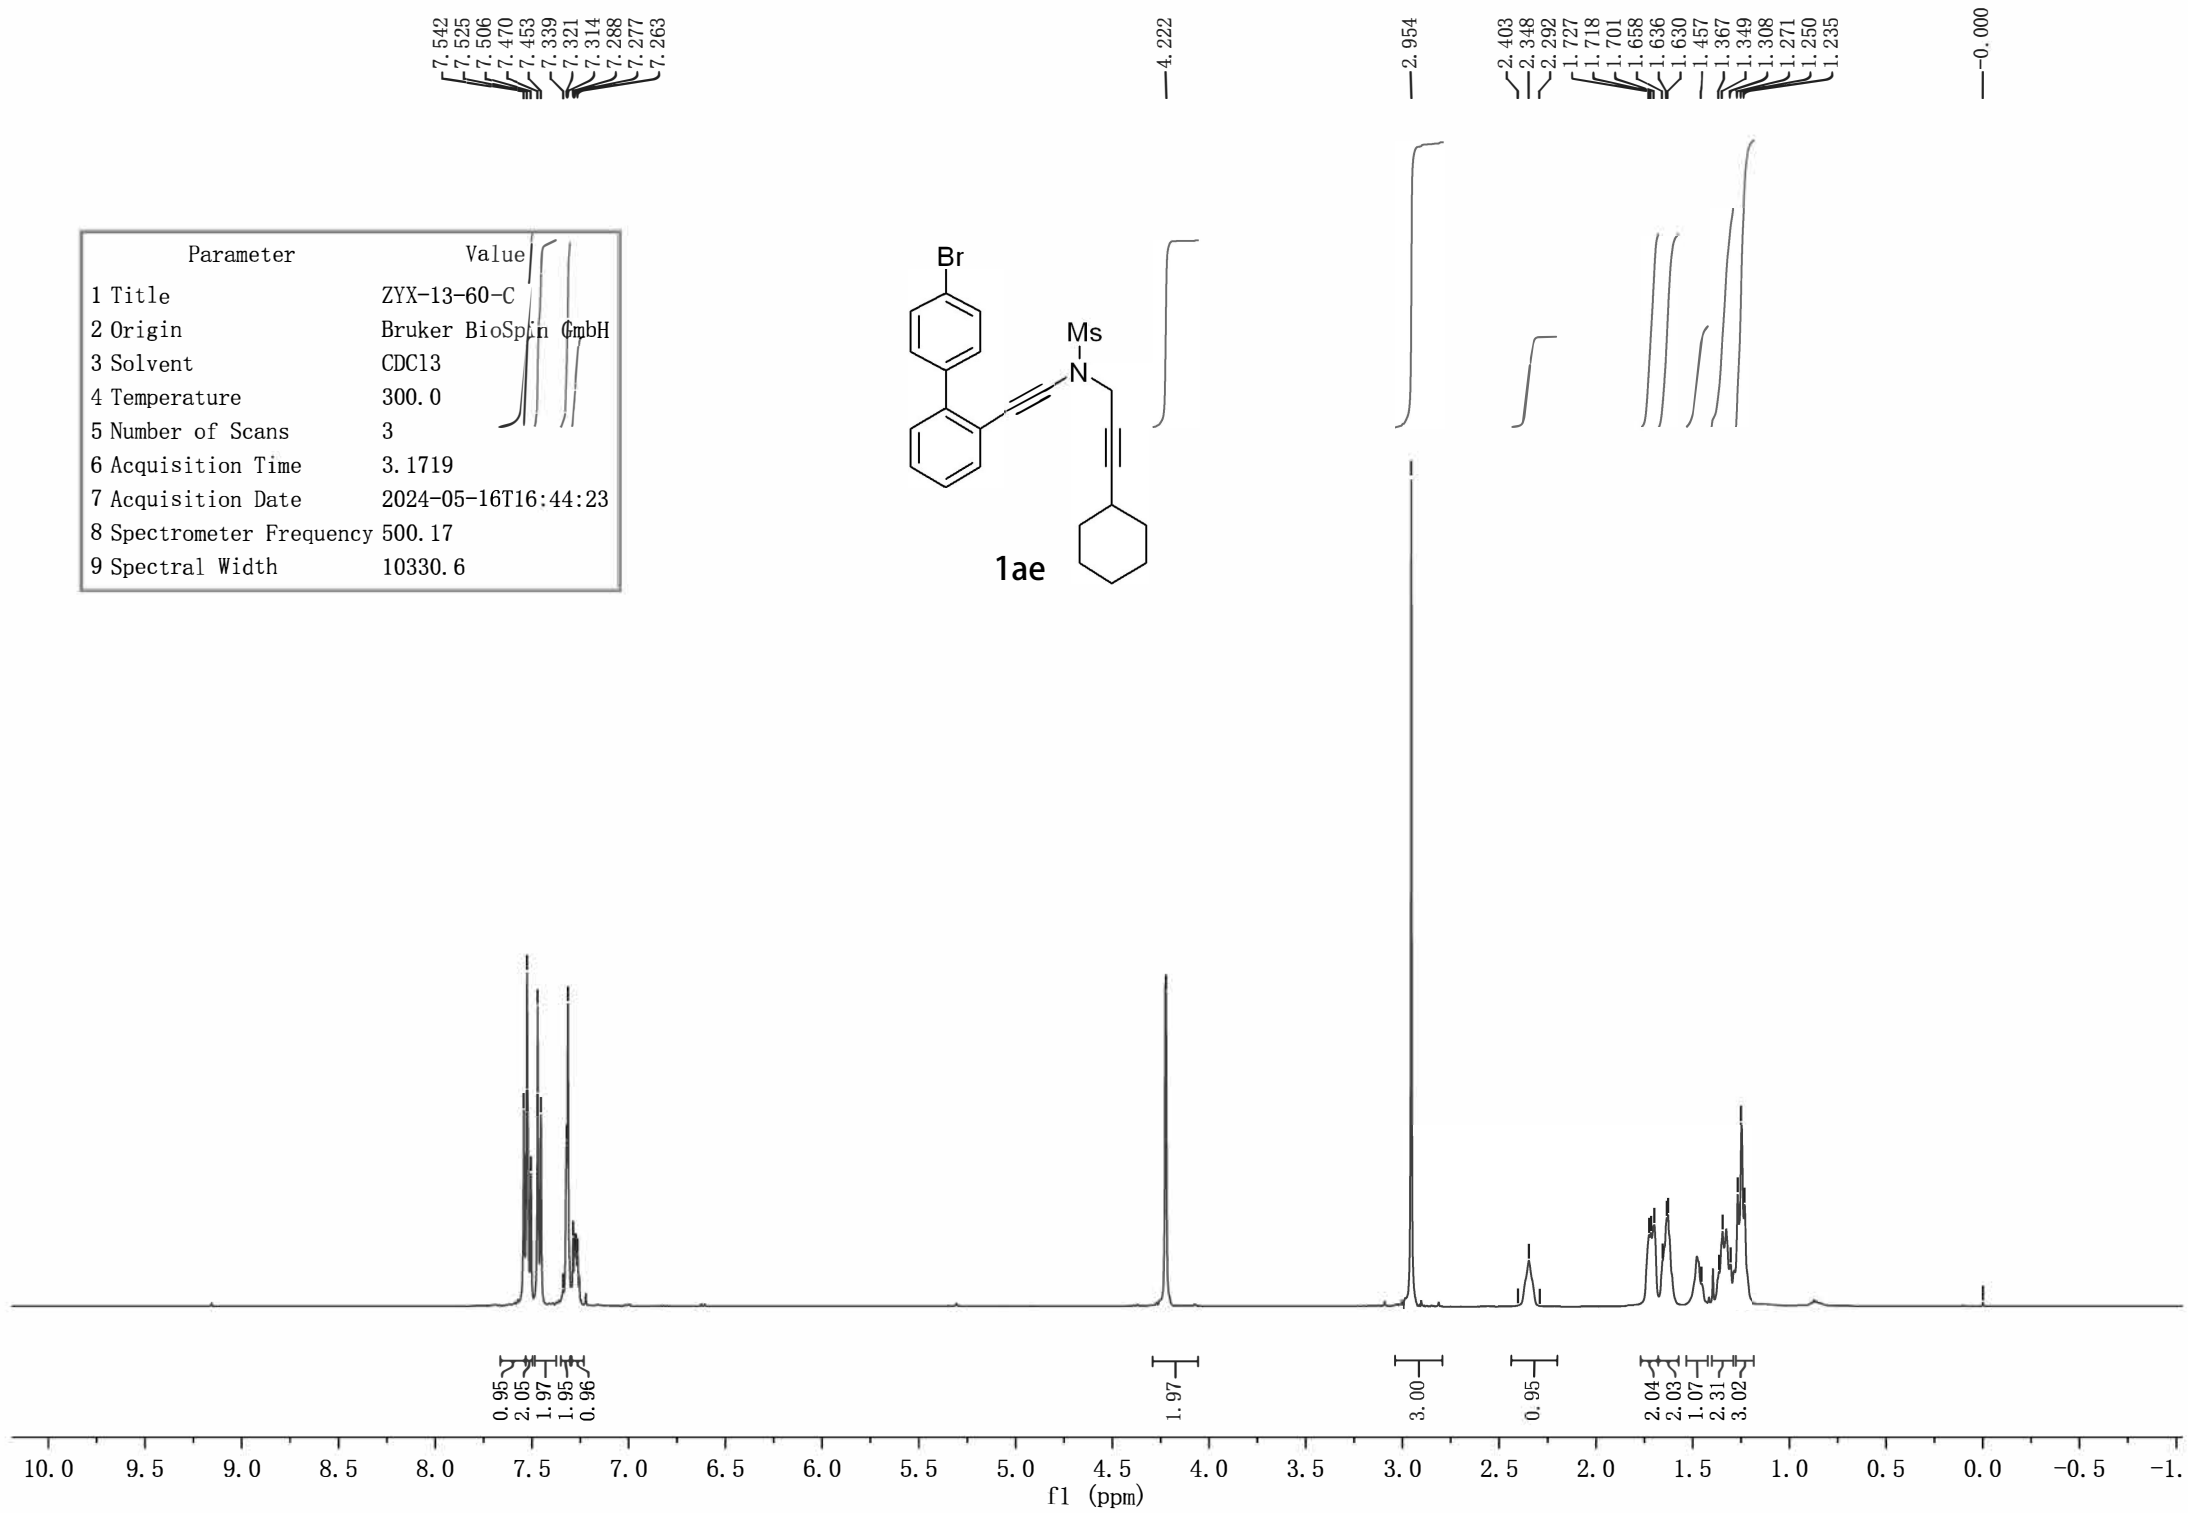

| Parameter                | Value               |
|--------------------------|---------------------|
| 1 Title                  | ZYX-13-60           |
| 2 Origin                 | Bruker BioSpin GmbH |
| 3 Solvent                | CDCl3               |
| 4 Temperature            | 297.5               |
| 5 Number of Scans        | 8                   |
| 6 Acquisition Time       | 1.1010              |
| 7 Acquisition Date       | 2024-05-16T16:45:13 |
| 8 Spectrometer Frequency | 125.77              |
| 9 Spectral Width         | 29761.9             |

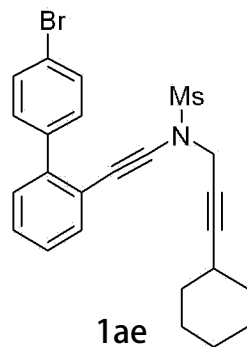

141.74  
139.17  
132.48  
130.93  
130.74  
128.91  
128.08  
127.20  
121.40  
120.48

91.76

84.46

77.25

77.00

76.74

72.27

70.43

42.24

38.31

32.17

28.67

25.48

24.50

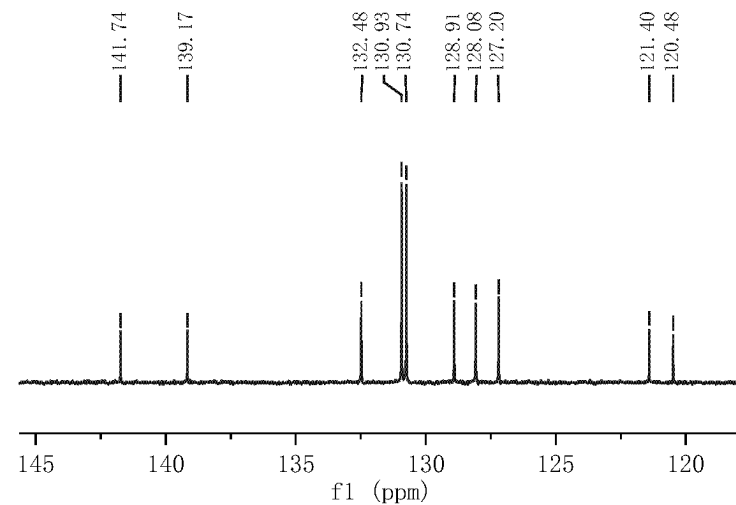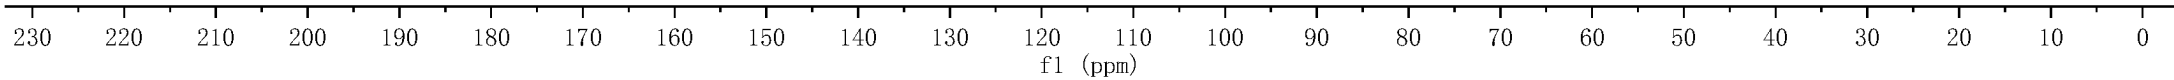

| Parameter                | Value               |
|--------------------------|---------------------|
| 1 Title                  | lct-15-133-H'       |
| 2 Origin                 | Bruker BioSpin GmbH |
| 3 Solvent                | CDCl3               |
| 4 Temperature            | 298.0               |
| 5 Number of Scans        | 5                   |
| 6 Acquisition Time       | 4.0394              |
| 7 Acquisition Date       | 2024-07-03T15:07:48 |
| 8 Spectrometer Frequency | 400.13              |
| 9 Spectral Width         | 8012.8              |

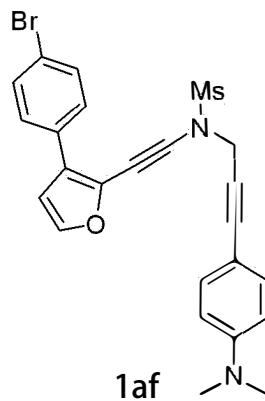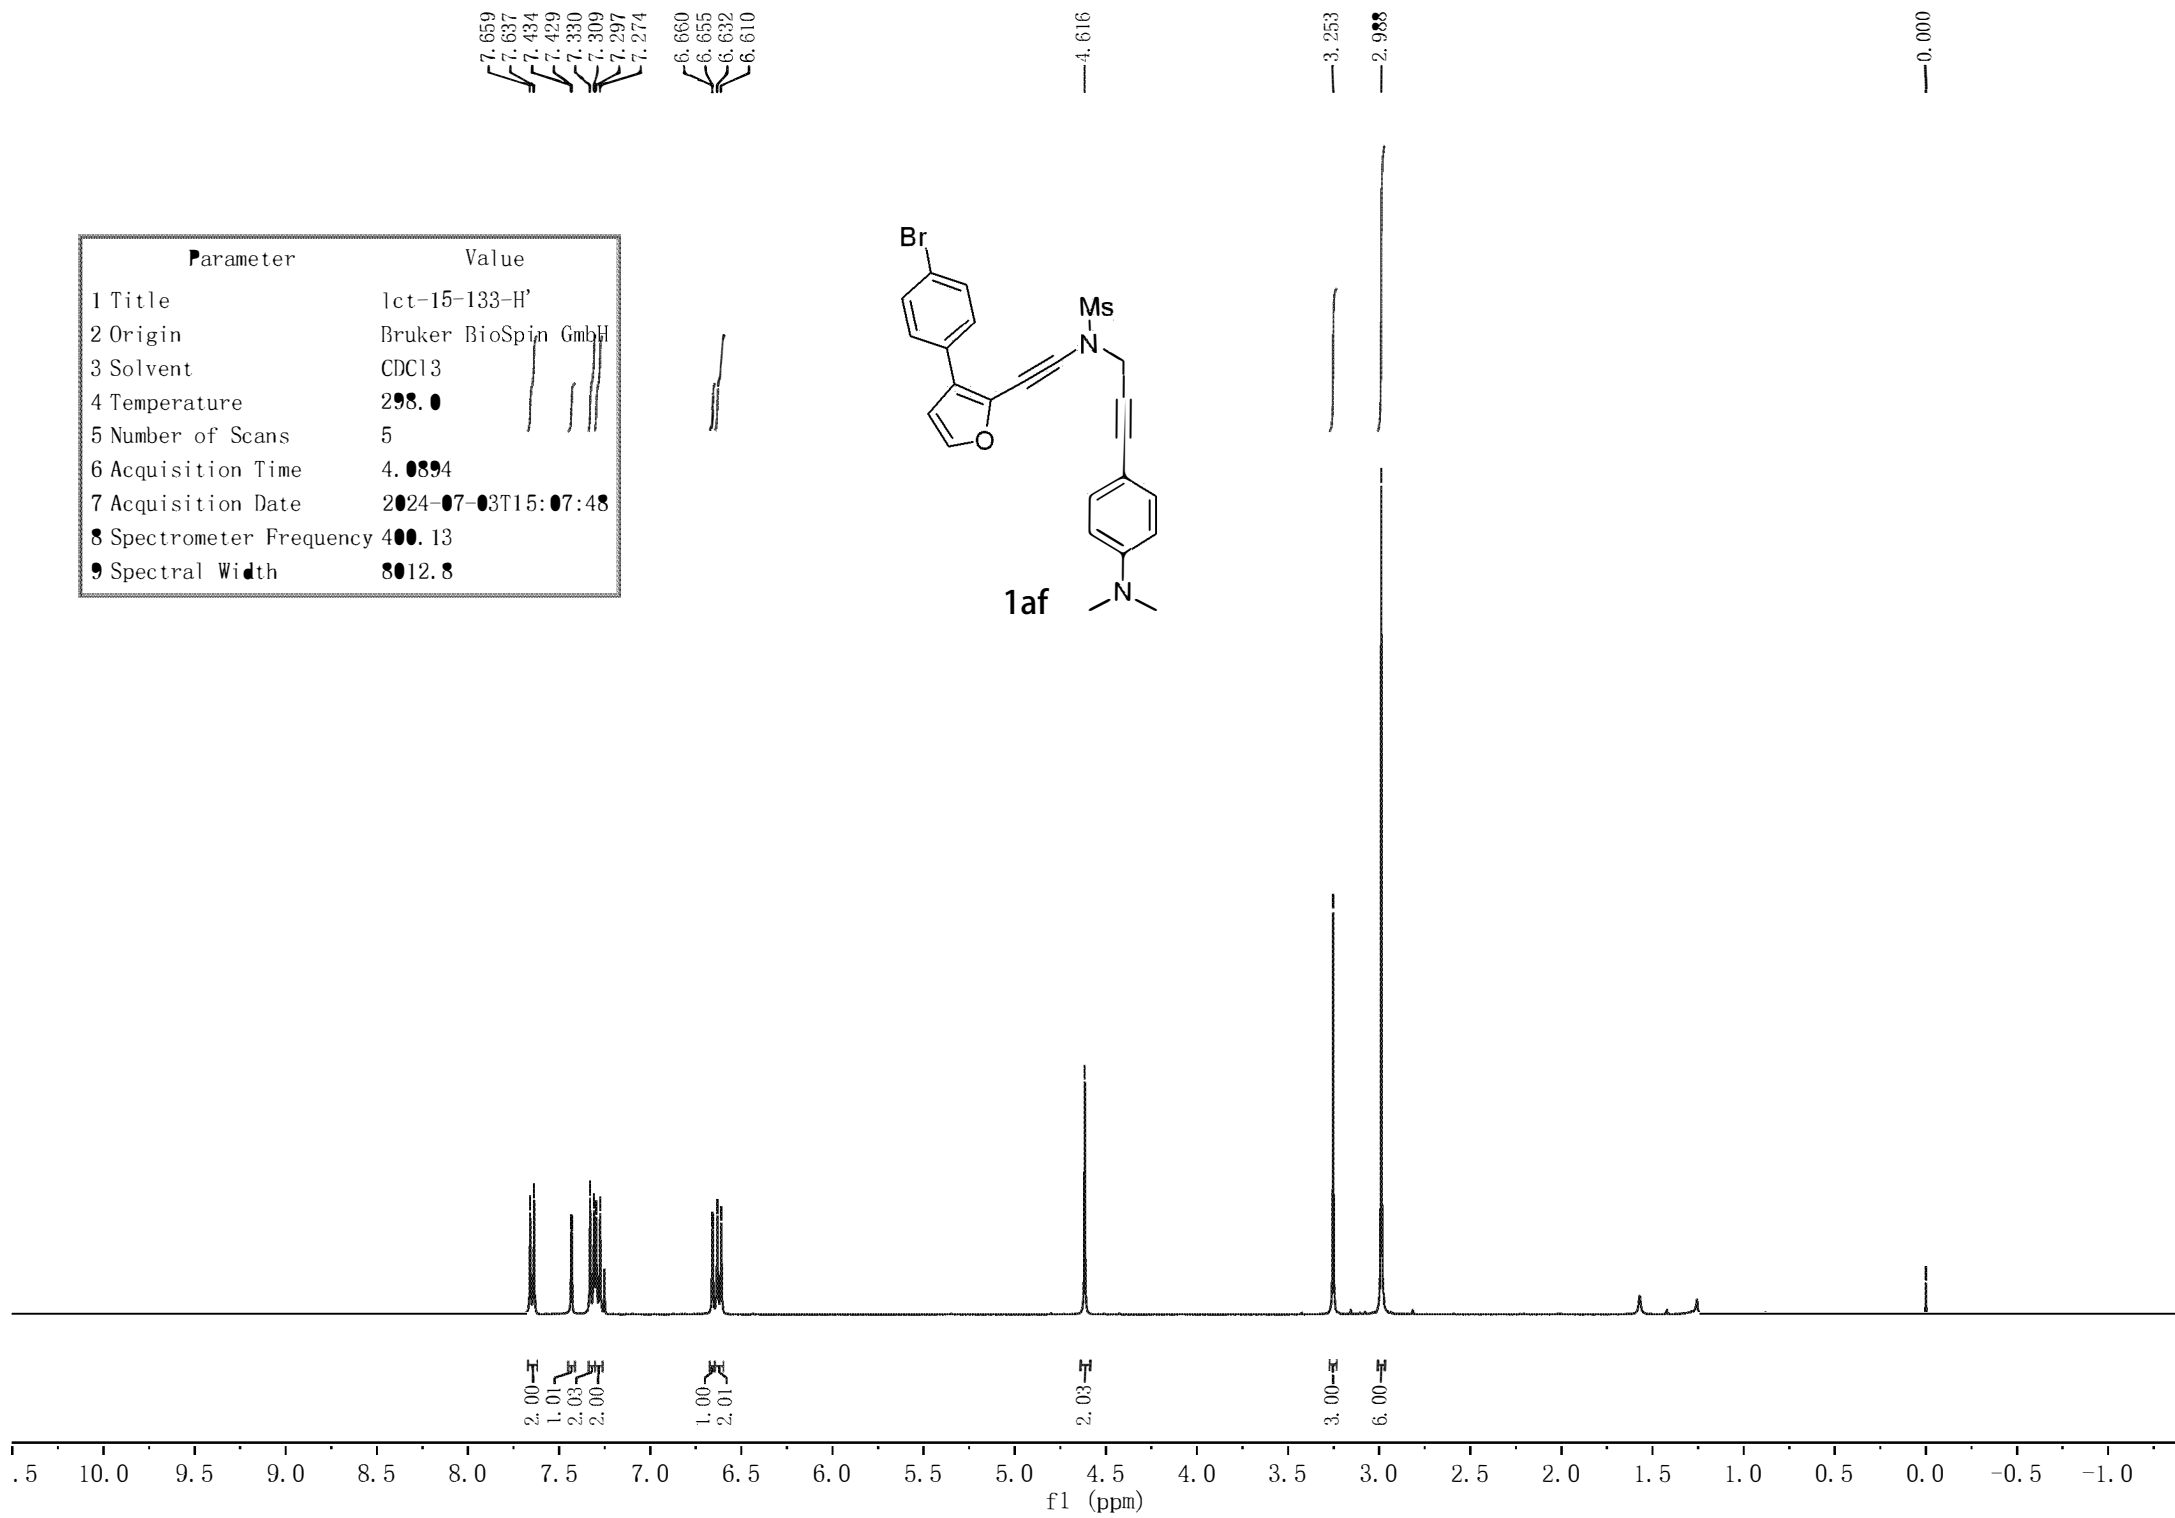

| Parameter                | Value               |
|--------------------------|---------------------|
| 1 Title                  | lct-15-133-C        |
| 2 Origin                 | Bruker BioSpin GmbH |
| 3 Solvent                | CDCl3               |
| 4 Temperature            | 300.0               |
| 5 Number of Scans        | 83                  |
| 6 Acquisition Time       | 1.3631              |
| 7 Acquisition Date       | 2024-07-03T15:09:00 |
| 8 Spectrometer Frequency | 100.61              |
| 9 Spectral Width         | 24038.5             |

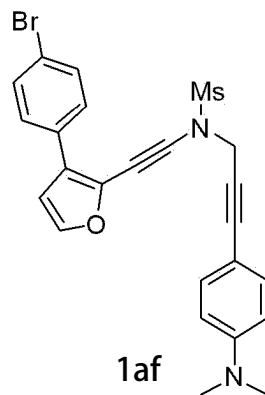

150.71 144.33 133.08 132.34 131.76 130.80 130.41 128.35 121.52 111.77 110.35 107.78 88.86 88.65 79.09 77.32 77.00 76.68 62.76 43.60 40.10 39.27

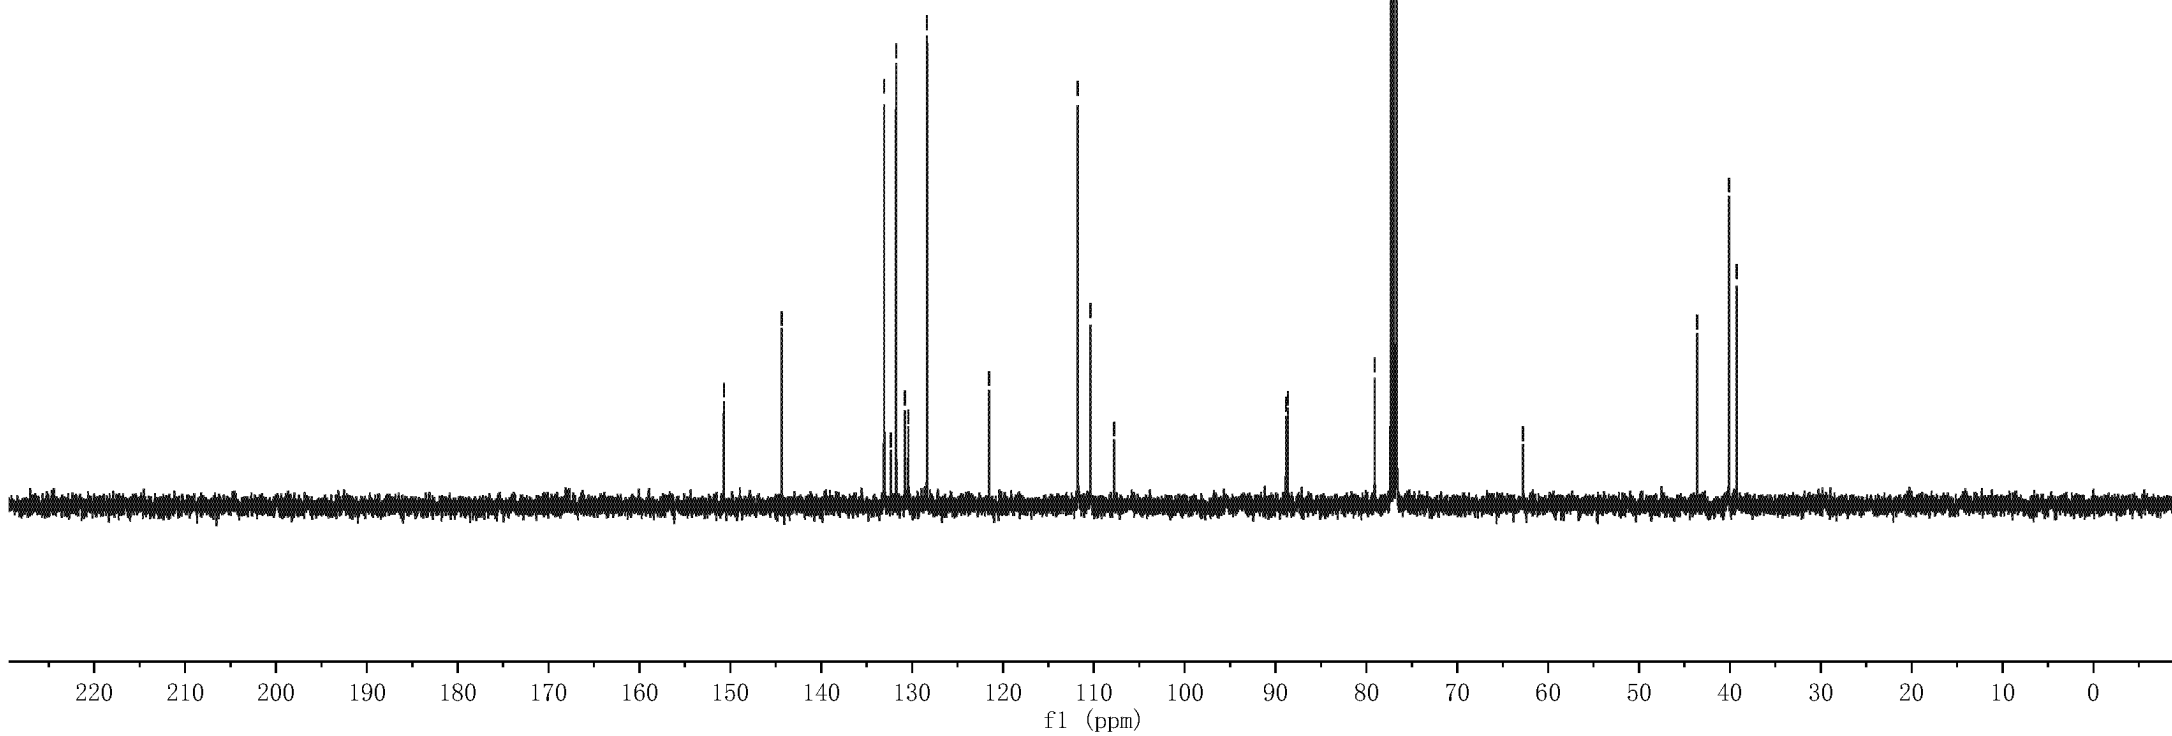

7.659  
7.655  
7.642  
7.638  
7.395  
7.373  
7.295  
7.282  
7.246  
7.151  
6.632  
6.610

4.567

3.173

2.980

0.000

| Parameter                | Value                 |
|--------------------------|-----------------------|
| 1 Title                  | 1ct-15-112-H-20240629 |
| 2 Origin                 | Bruker BioSpin GmbH   |
| 3 Solvent                | CDC13                 |
| 4 Temperature            | 298.0                 |
| 5 Number of Scans        | 5                     |
| 6 Acquisition Time       | 4.0894                |
| 7 Acquisition Date       | 2024-06-29T21:54:43   |
| 8 Spectrometer Frequency | 400.13                |
| 9 Spectral Width         | 8012.8                |

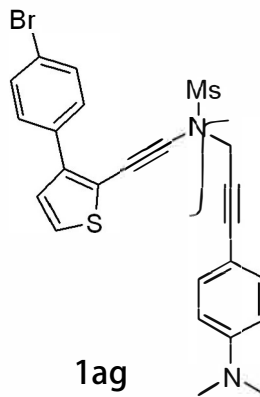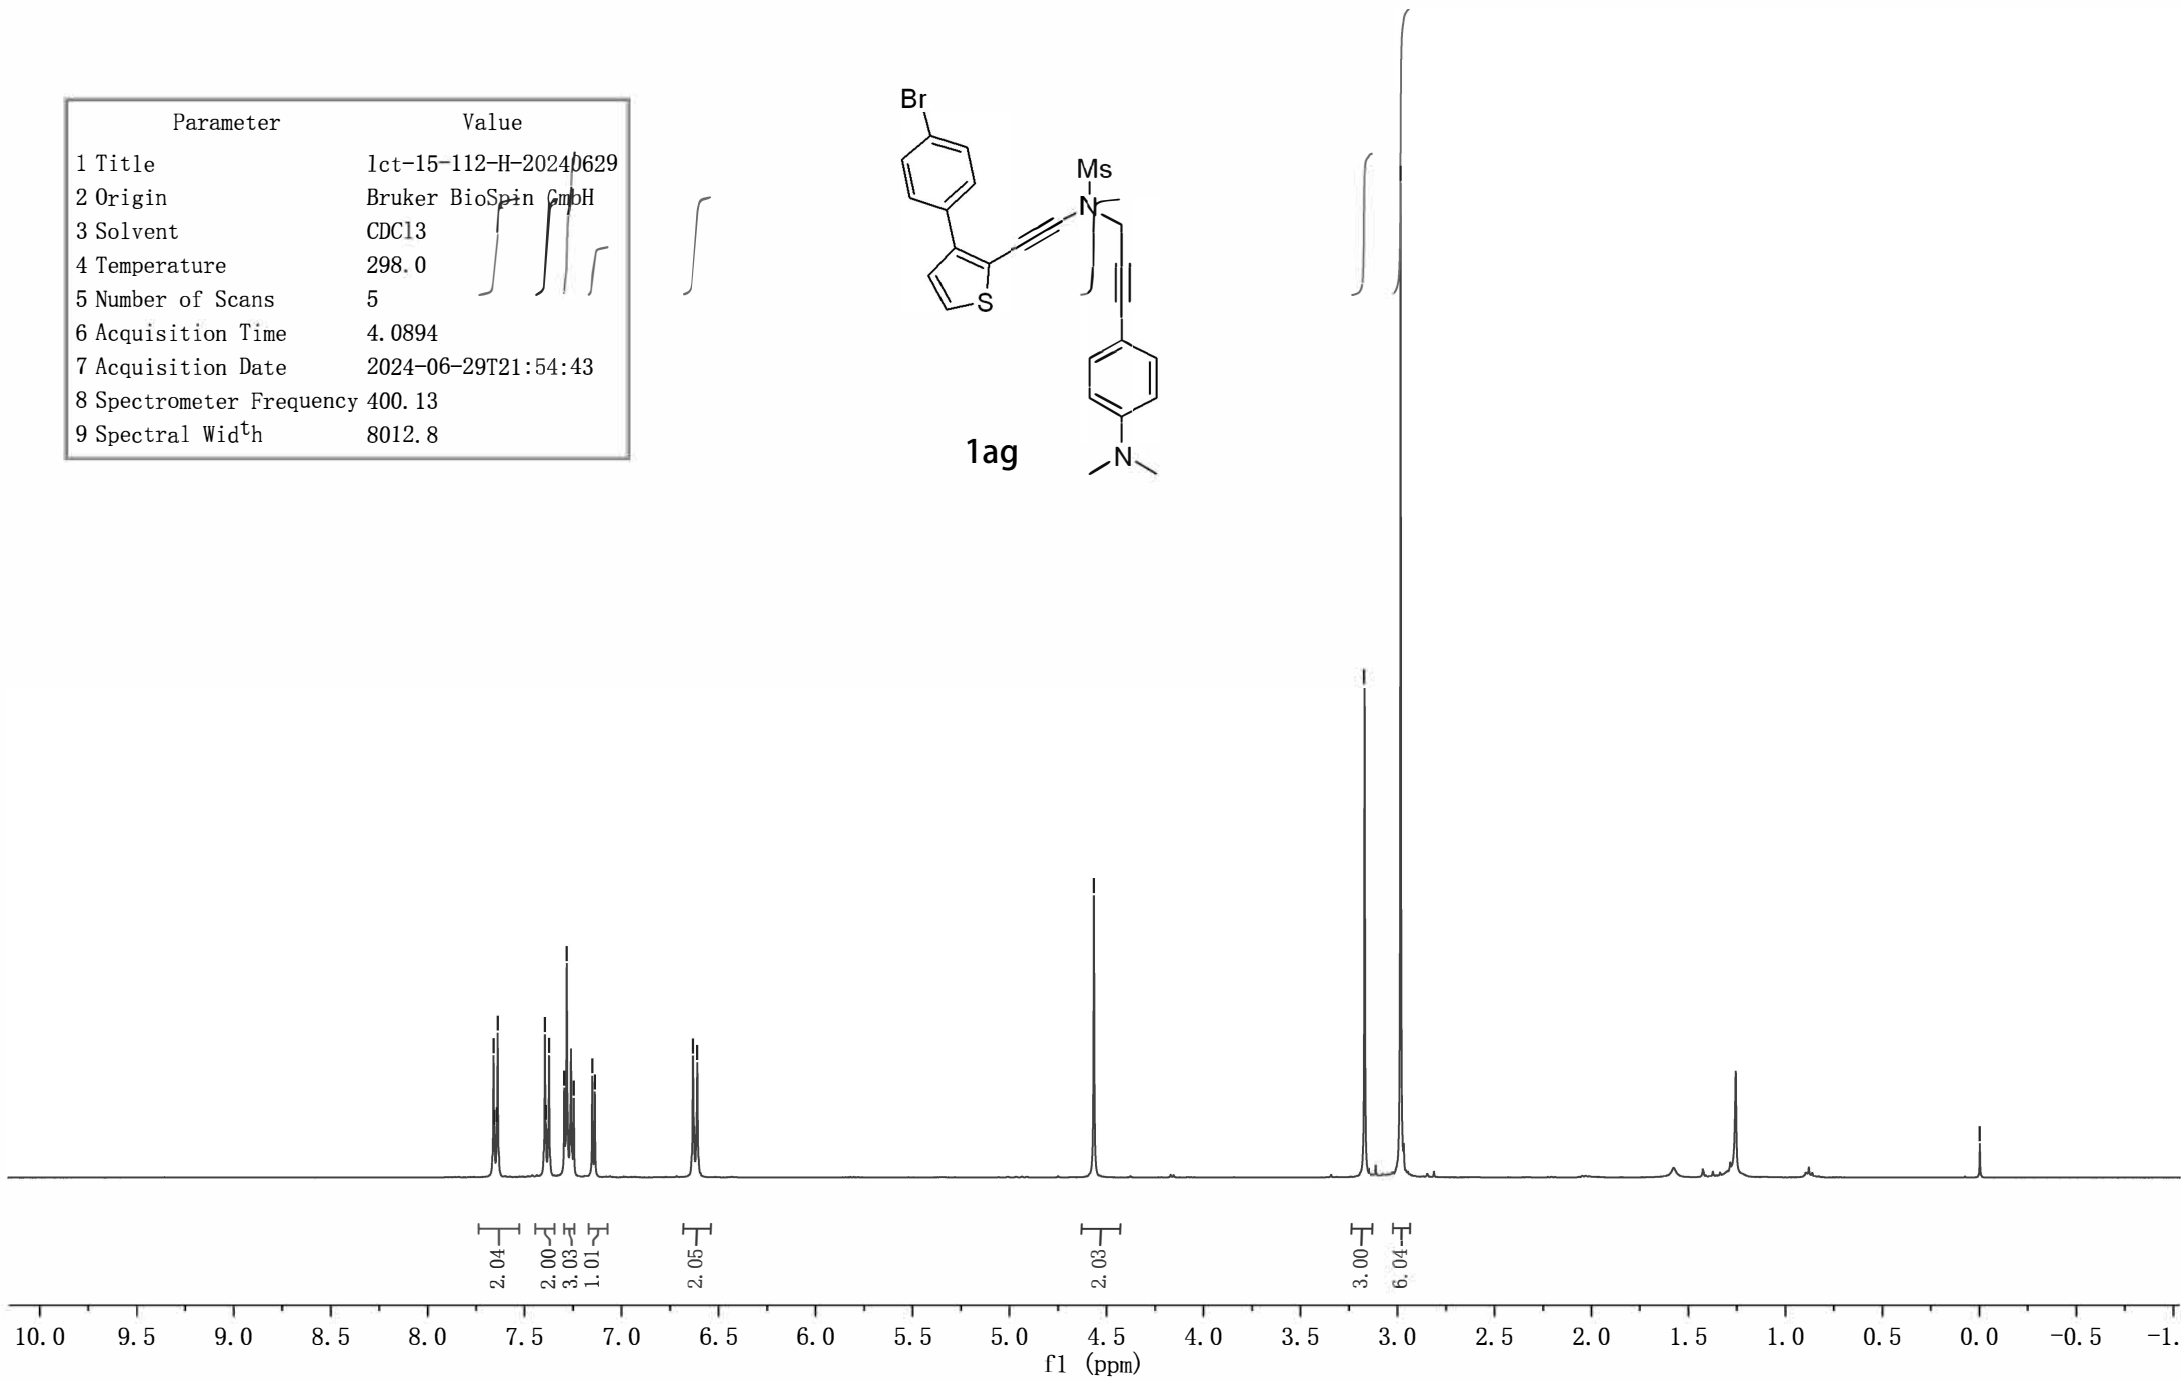

150.65 — 144.53 — 134.09 133.00 131.51 129.51 127.56 127.35 121.65 117.58 111.79 107.89 — 88.51 87.52 79.17 77.32 77.00 76.68 — 64.88 — 43.49 40.09 38.99

| Parameter                | Value                 |
|--------------------------|-----------------------|
| 1 Title                  | lct-15-112-C-20240629 |
| 2 Origin                 | Bruker BioSpin GmbH   |
| 3 Solvent                | CDCl3                 |
| 4 Temperature            | 300.0                 |
| 5 Number of Scans        | 90                    |
| 6 Acquisition Time       | 1.3631                |
| 7 Acquisition Date       | 2024-06-29T21:55:46   |
| 8 Spectrometer Frequency | 100.61                |
| 9 Spectral Width         | 24038.5               |

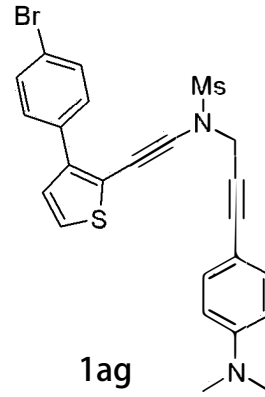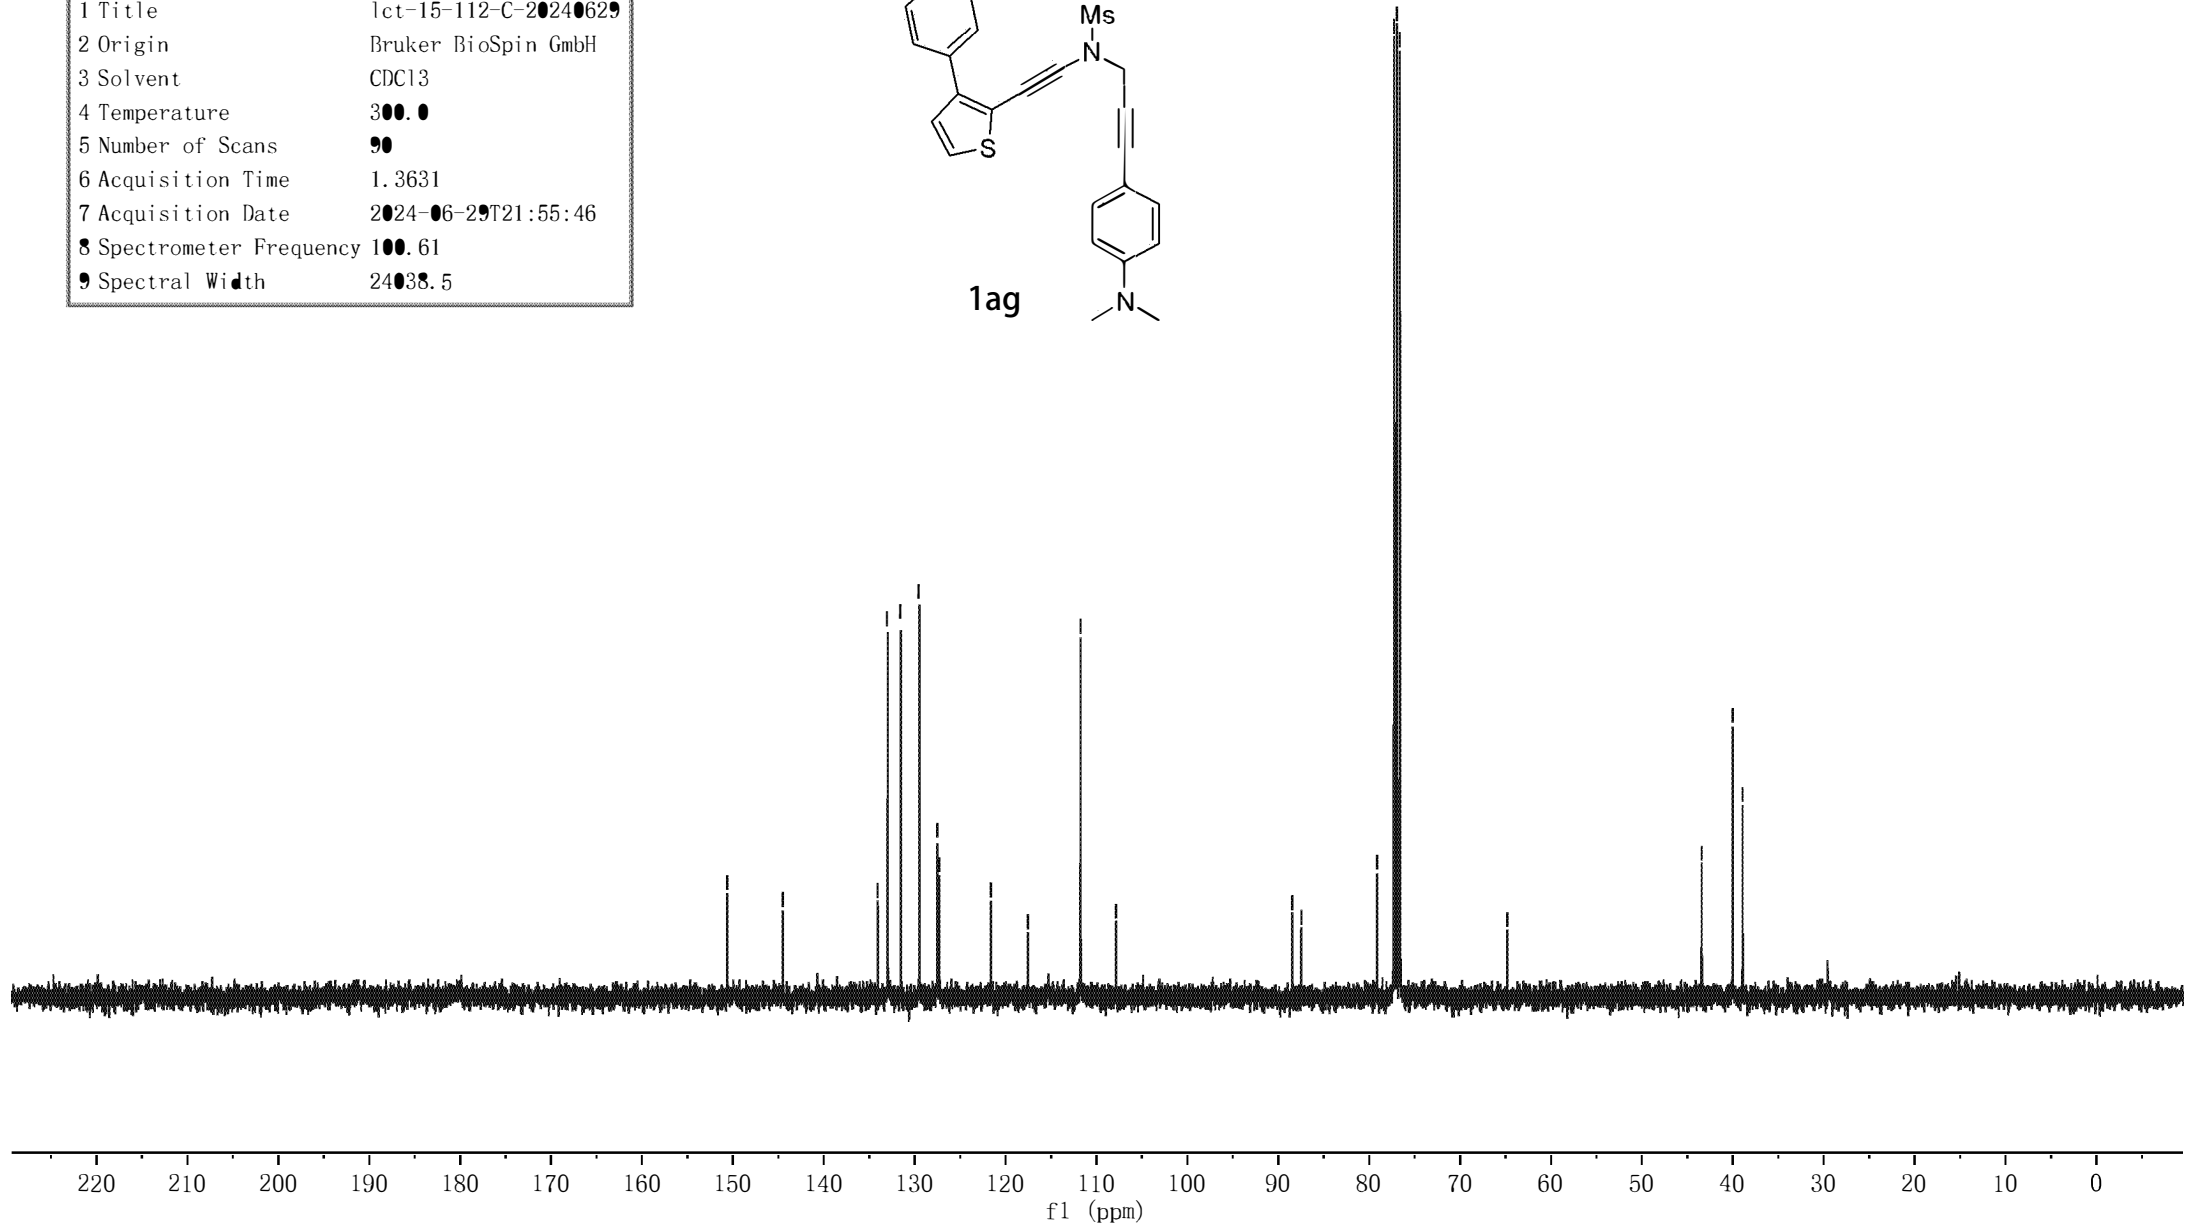

| Parameter                | Value               |
|--------------------------|---------------------|
| 1 Title                  | zyx-13-145-h        |
| 2 Origin                 | Bruker BioSpin GmbH |
| 3 Solvent                | CDCl3               |
| 4 Temperature            | 298.0               |
| 5 Number of Scans        | 8                   |
| 6 Acquisition Time       | 4.0394              |
| 7 Acquisition Date       | 2024-06-17T15:39:43 |
| 8 Spectrometer Frequency | 400.13              |
| 9 Spectral Width         | 8012.8              |

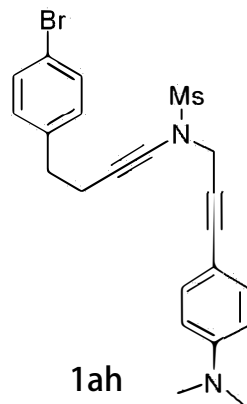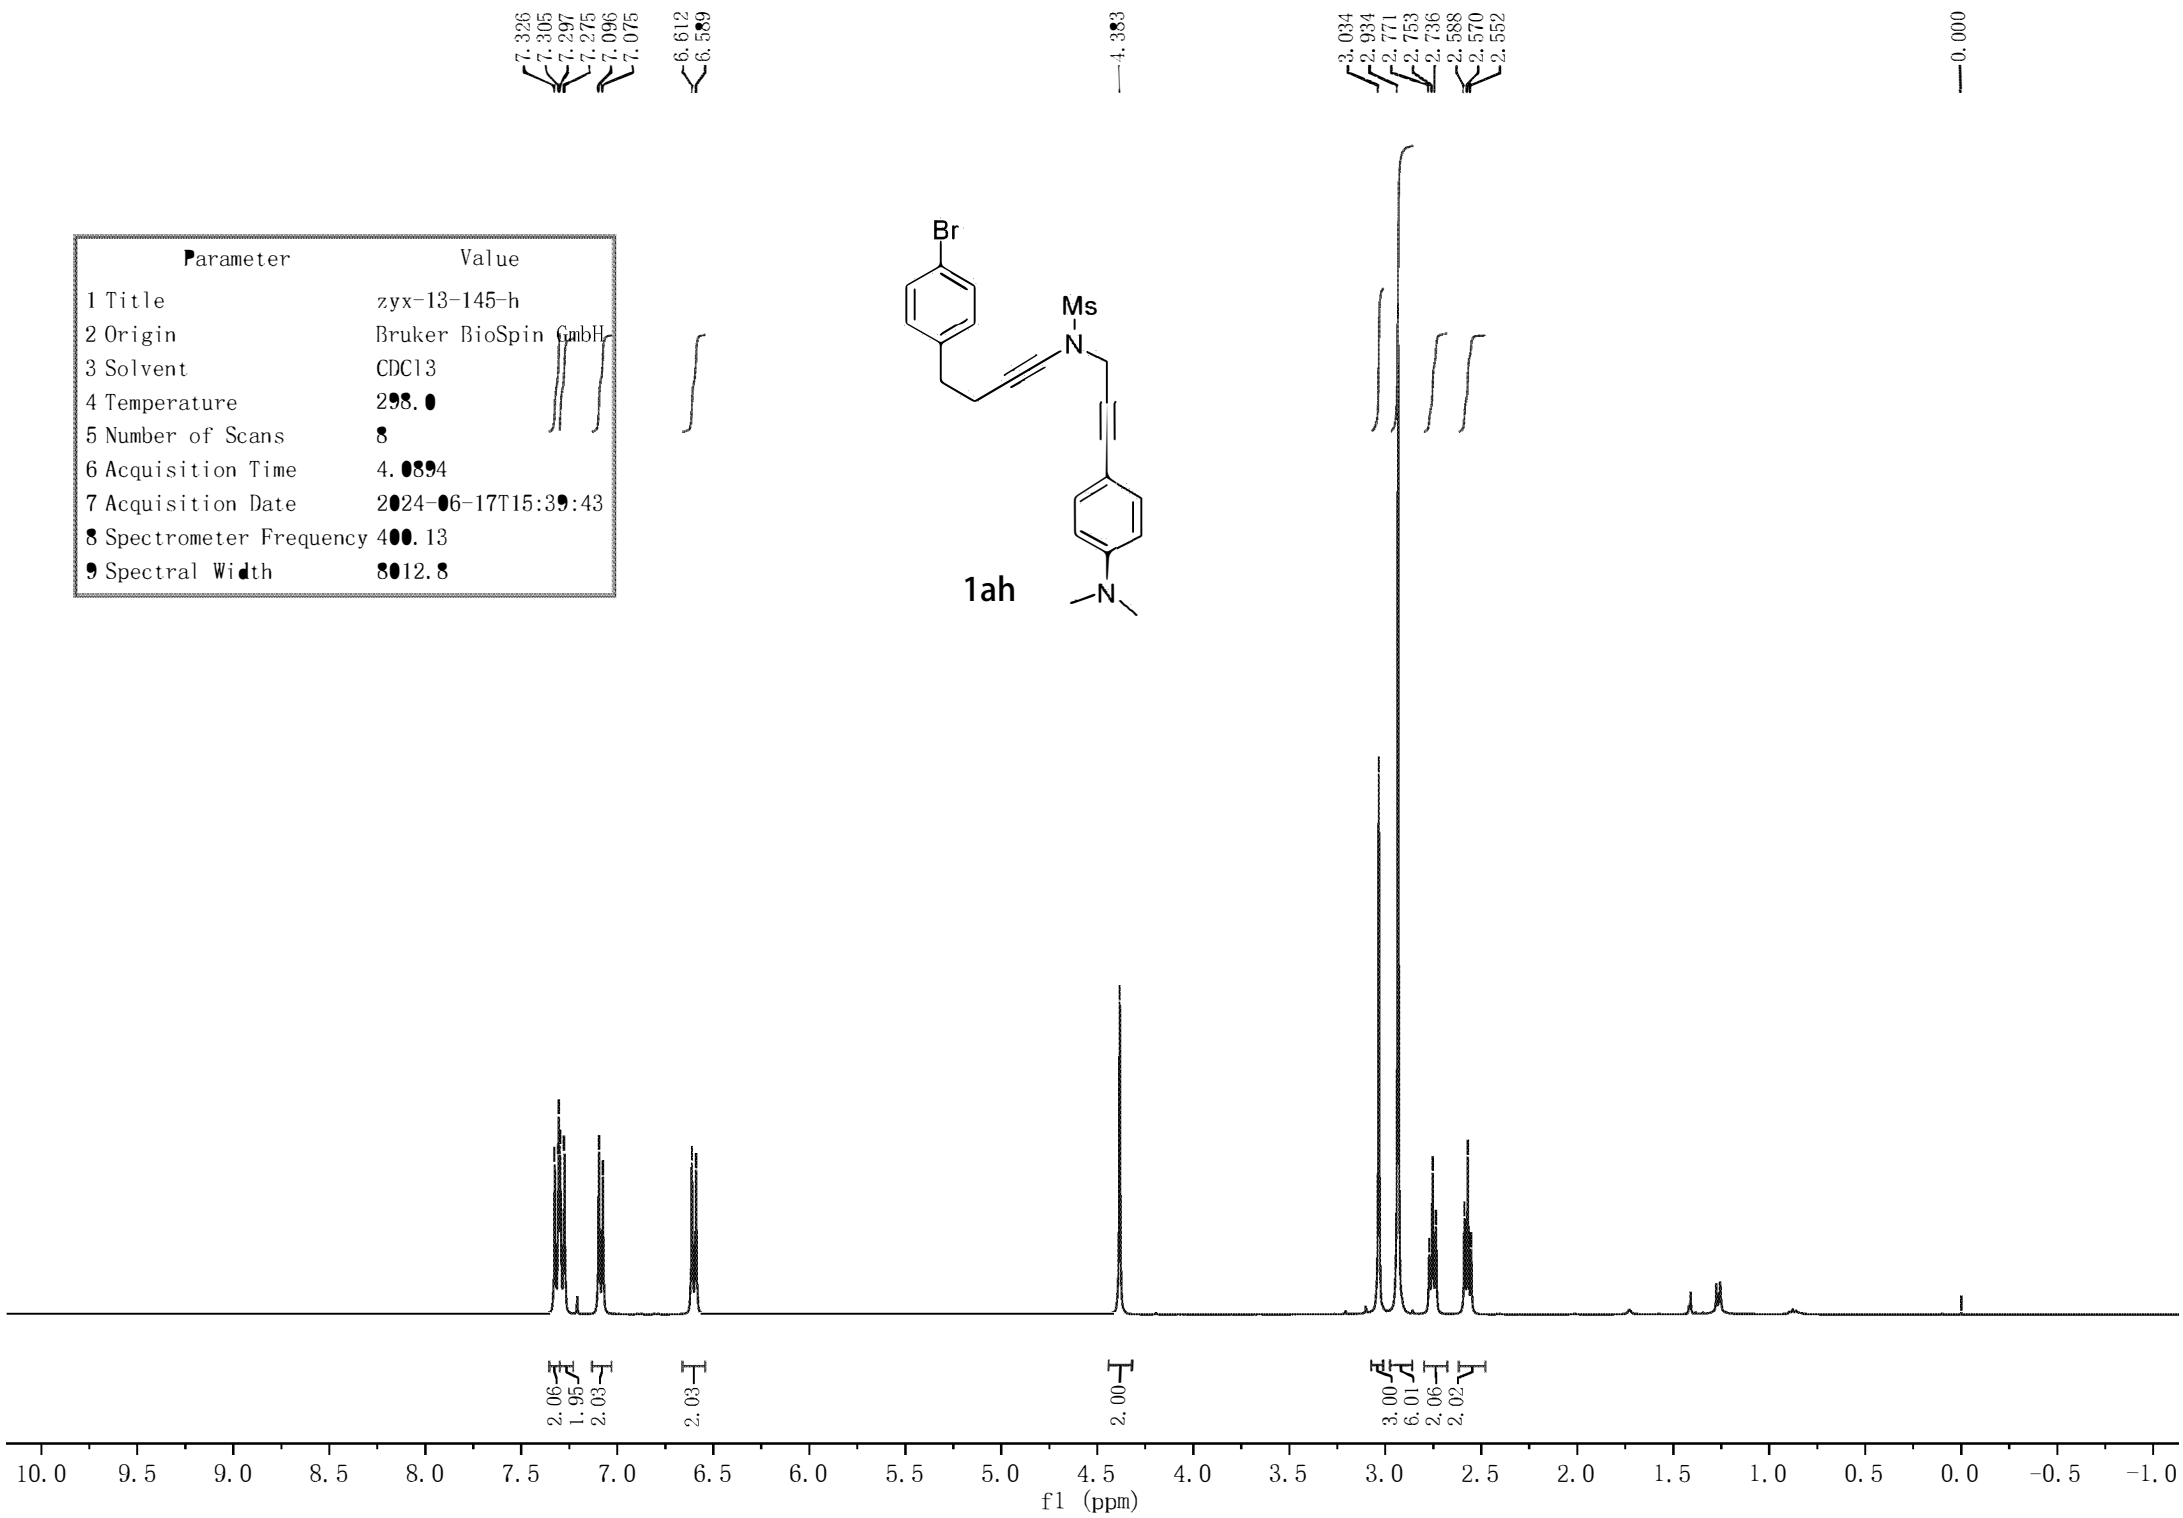

| Parameter                | Value               |
|--------------------------|---------------------|
| 1 Title                  | zyx-13-145-c        |
| 2 Origin                 | Bruker BioSpin GmbH |
| 3 Solvent                | CDCl3               |
| 4 Temperature            | 300.0               |
| 5 Number of Scans        | 16                  |
| 6 Acquisition Time       | 1.3631              |
| 7 Acquisition Date       | 2024-06-17T15:41:40 |
| 8 Spectrometer Frequency | 100.61              |
| 9 Spectral Width         | 24038.5             |

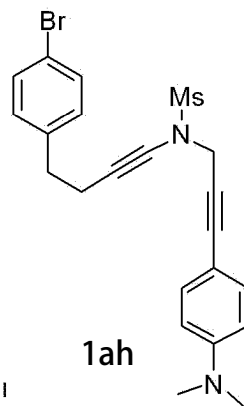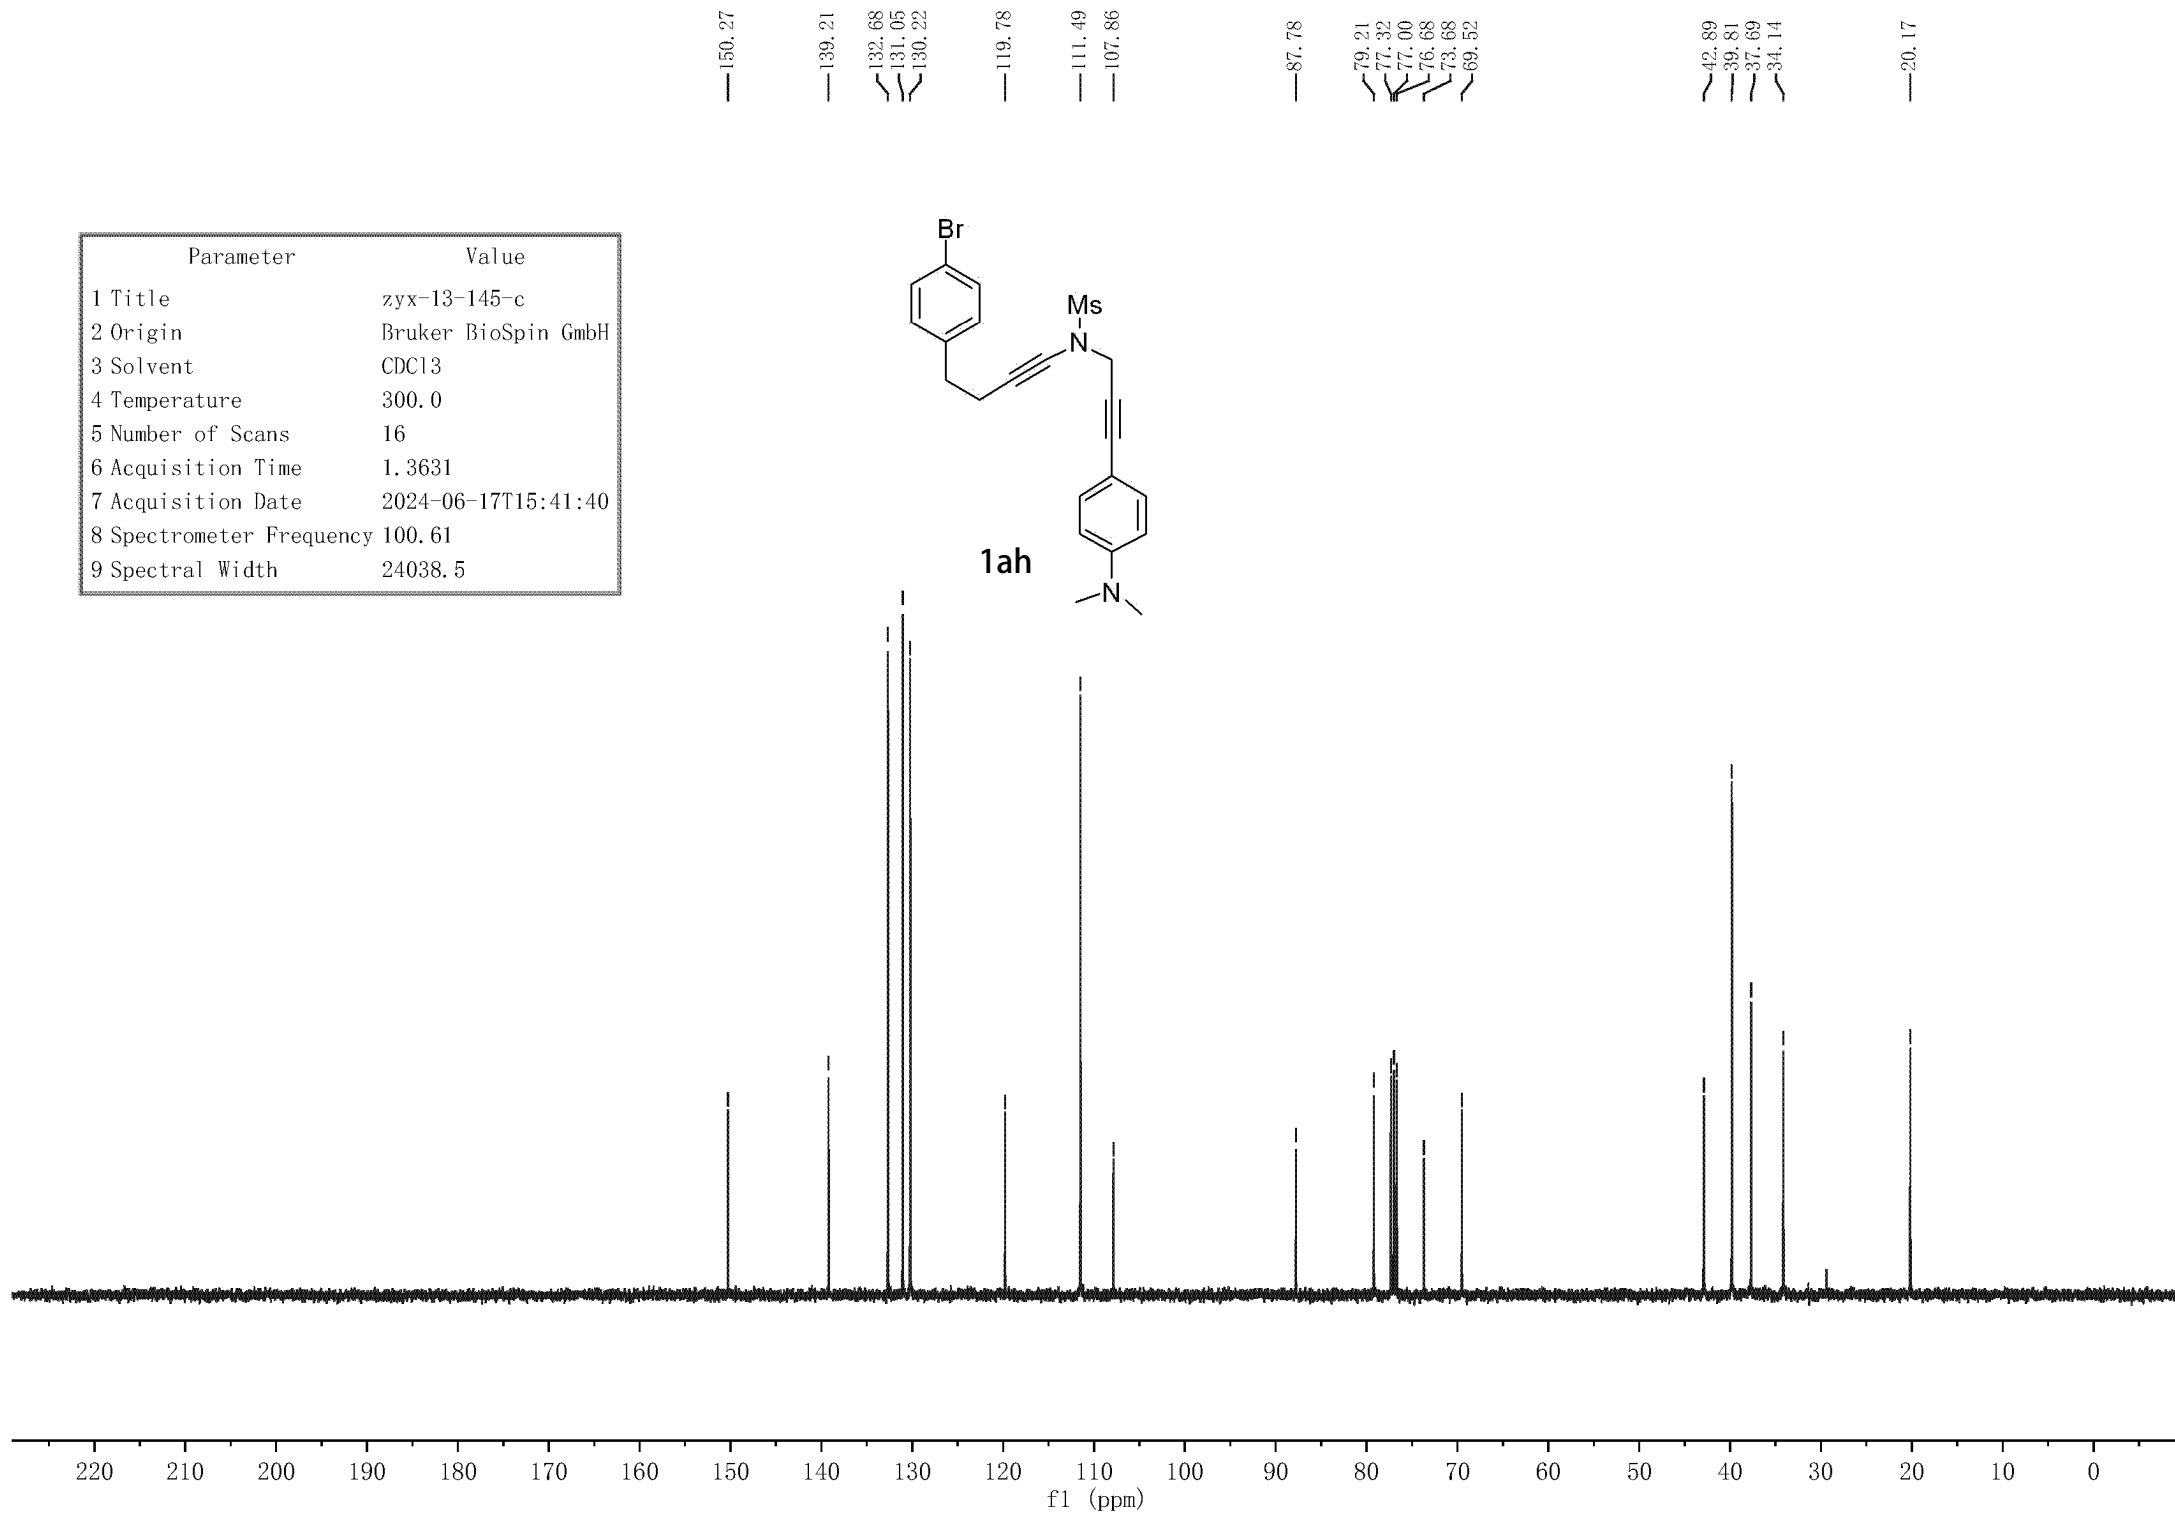



| Parameter                | Value               |
|--------------------------|---------------------|
| 1 Title                  | zyx-13-145-dept     |
| 2 Origin                 | Bruker BioSpin GmbH |
| 3 Solvent                | CDCl3               |
| 4 Temperature            | 300.0               |
| 5 Number of Scans        | 15                  |
| 6 Acquisition Time       | 1.3631              |
| 7 Acquisition Date       | 2024-06-17T15:43:33 |
| 8 Spectrometer Frequency | 100.61              |
| 9 Spectral Width         | 24038.5             |

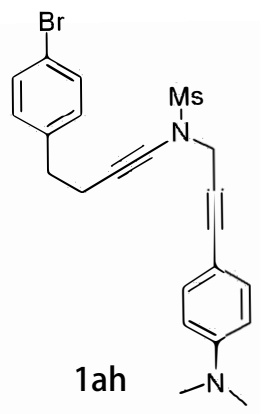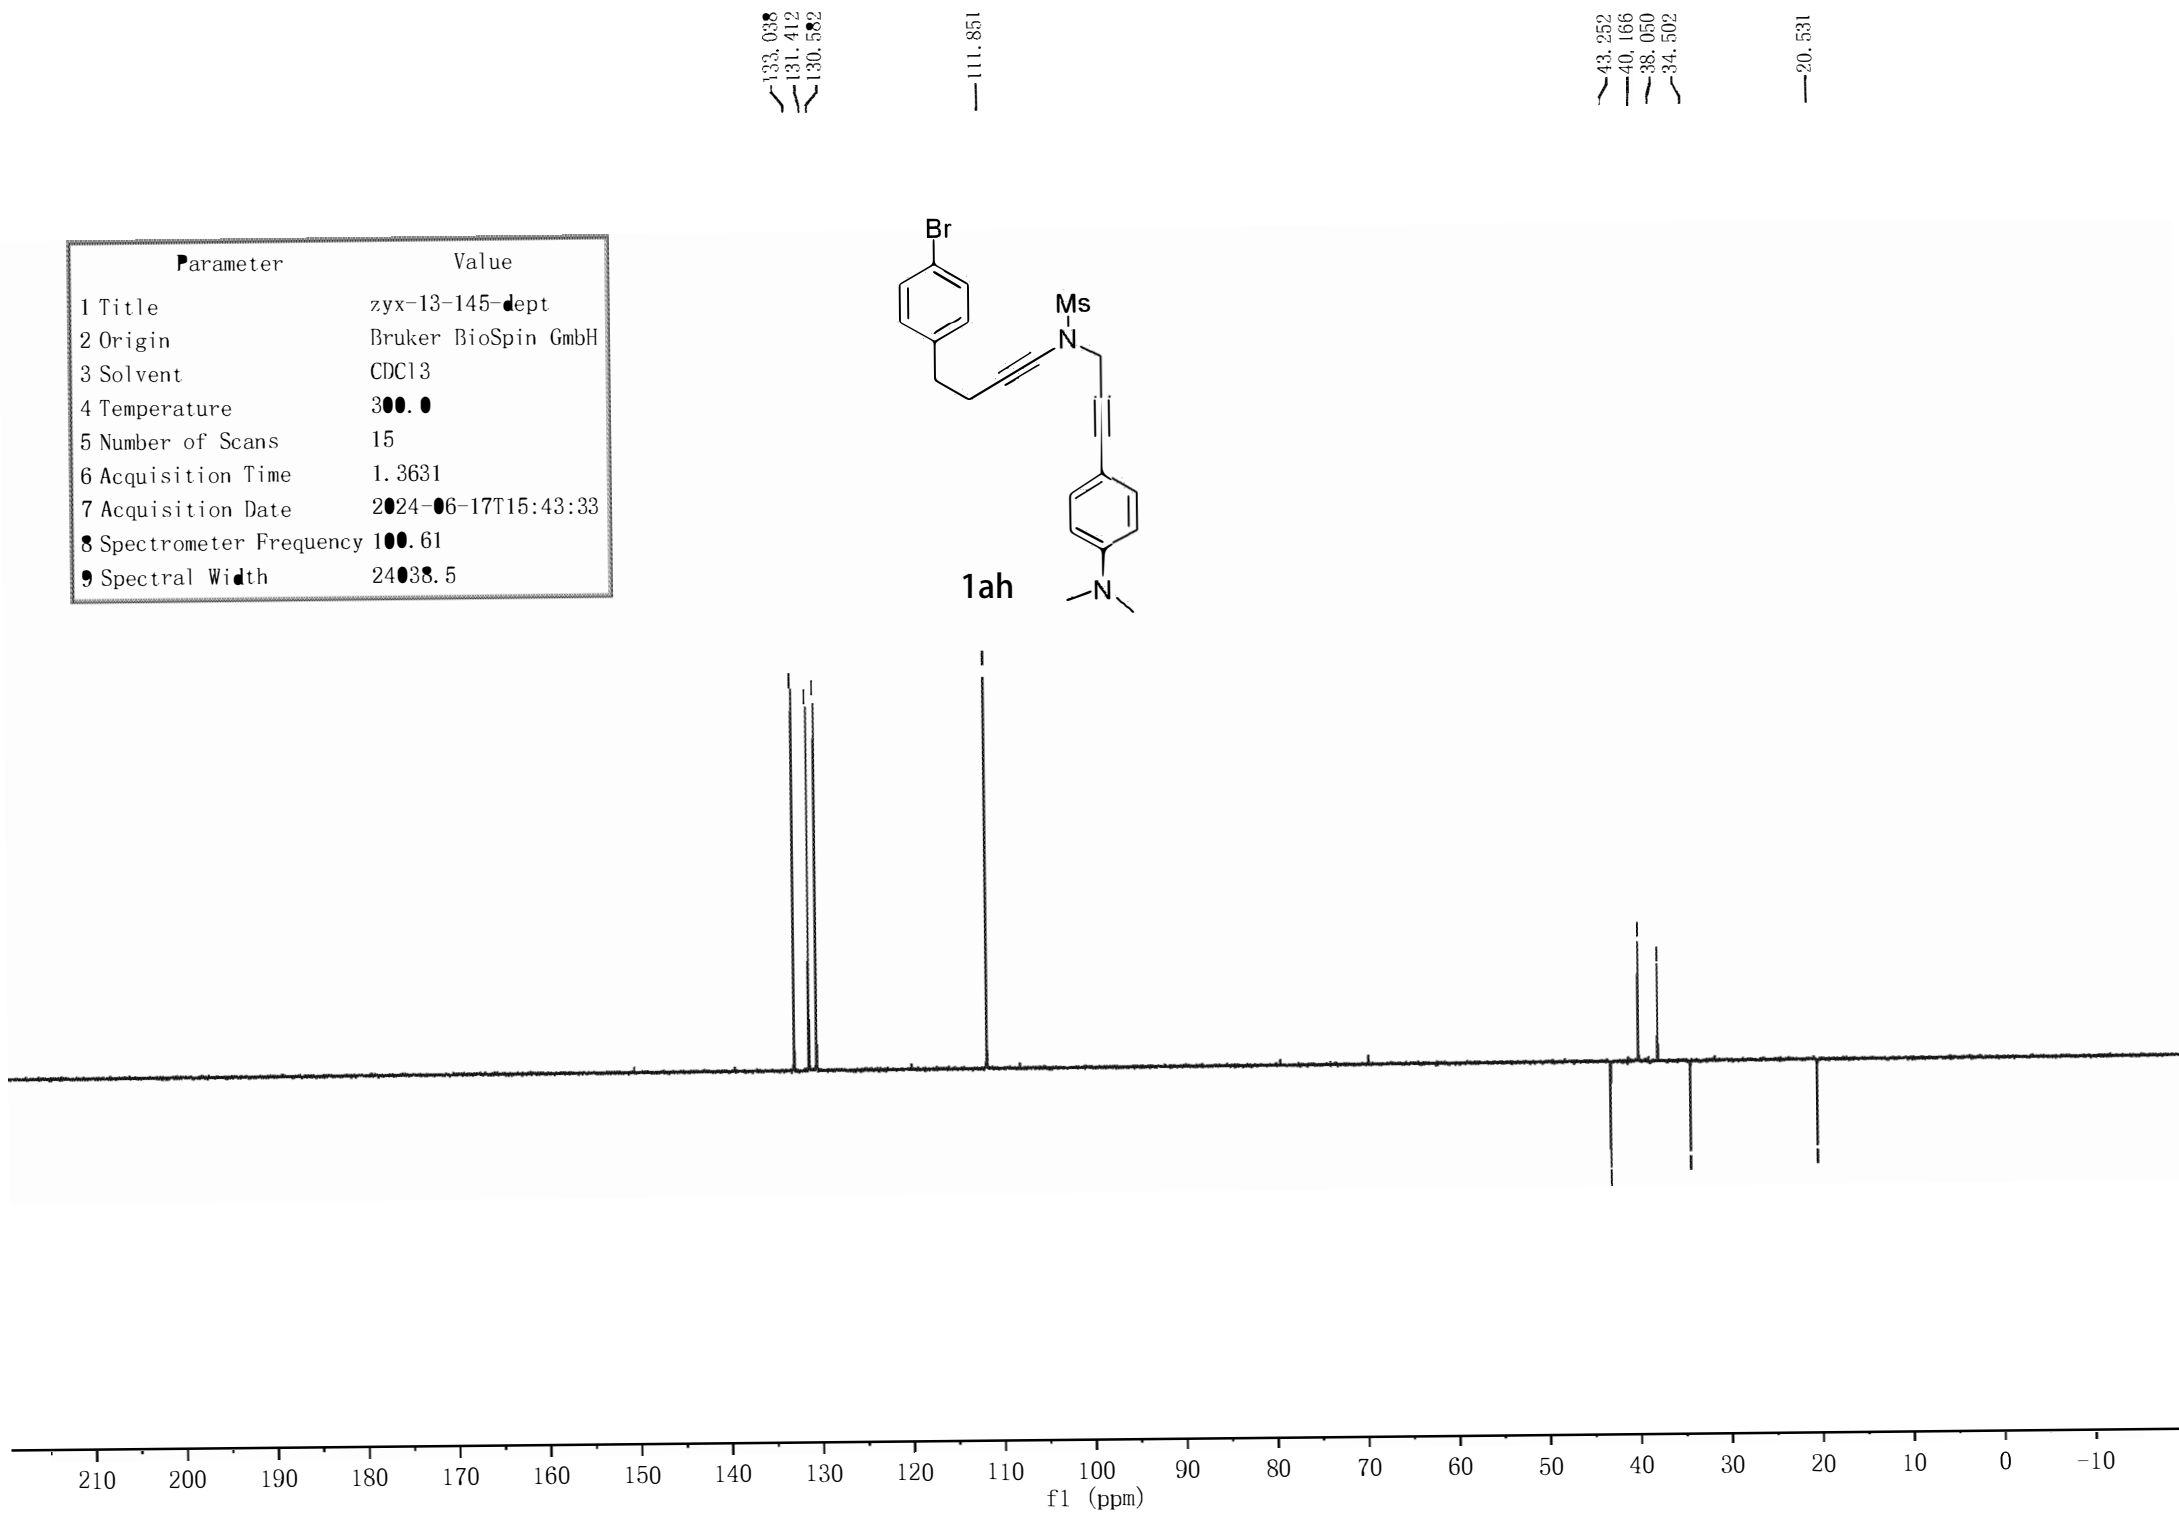

| Parameter                | Value               |
|--------------------------|---------------------|
| 1 Title                  | ZYX-13-190-H        |
| 2 Origin                 | Bruker BioSpin GmbH |
| 3 Solvent                | CDCl3               |
| 4 Temperature            | 298.1               |
| 5 Number of Scans        | 4                   |
| 6 Acquisition Time       | 3.1719              |
| 7 Acquisition Date       | 2024-07-11T15:48:20 |
| 8 Spectrometer Frequency | 500.17              |
| 9 Spectral Width         | 10330.6             |

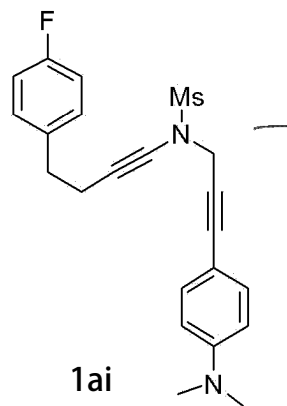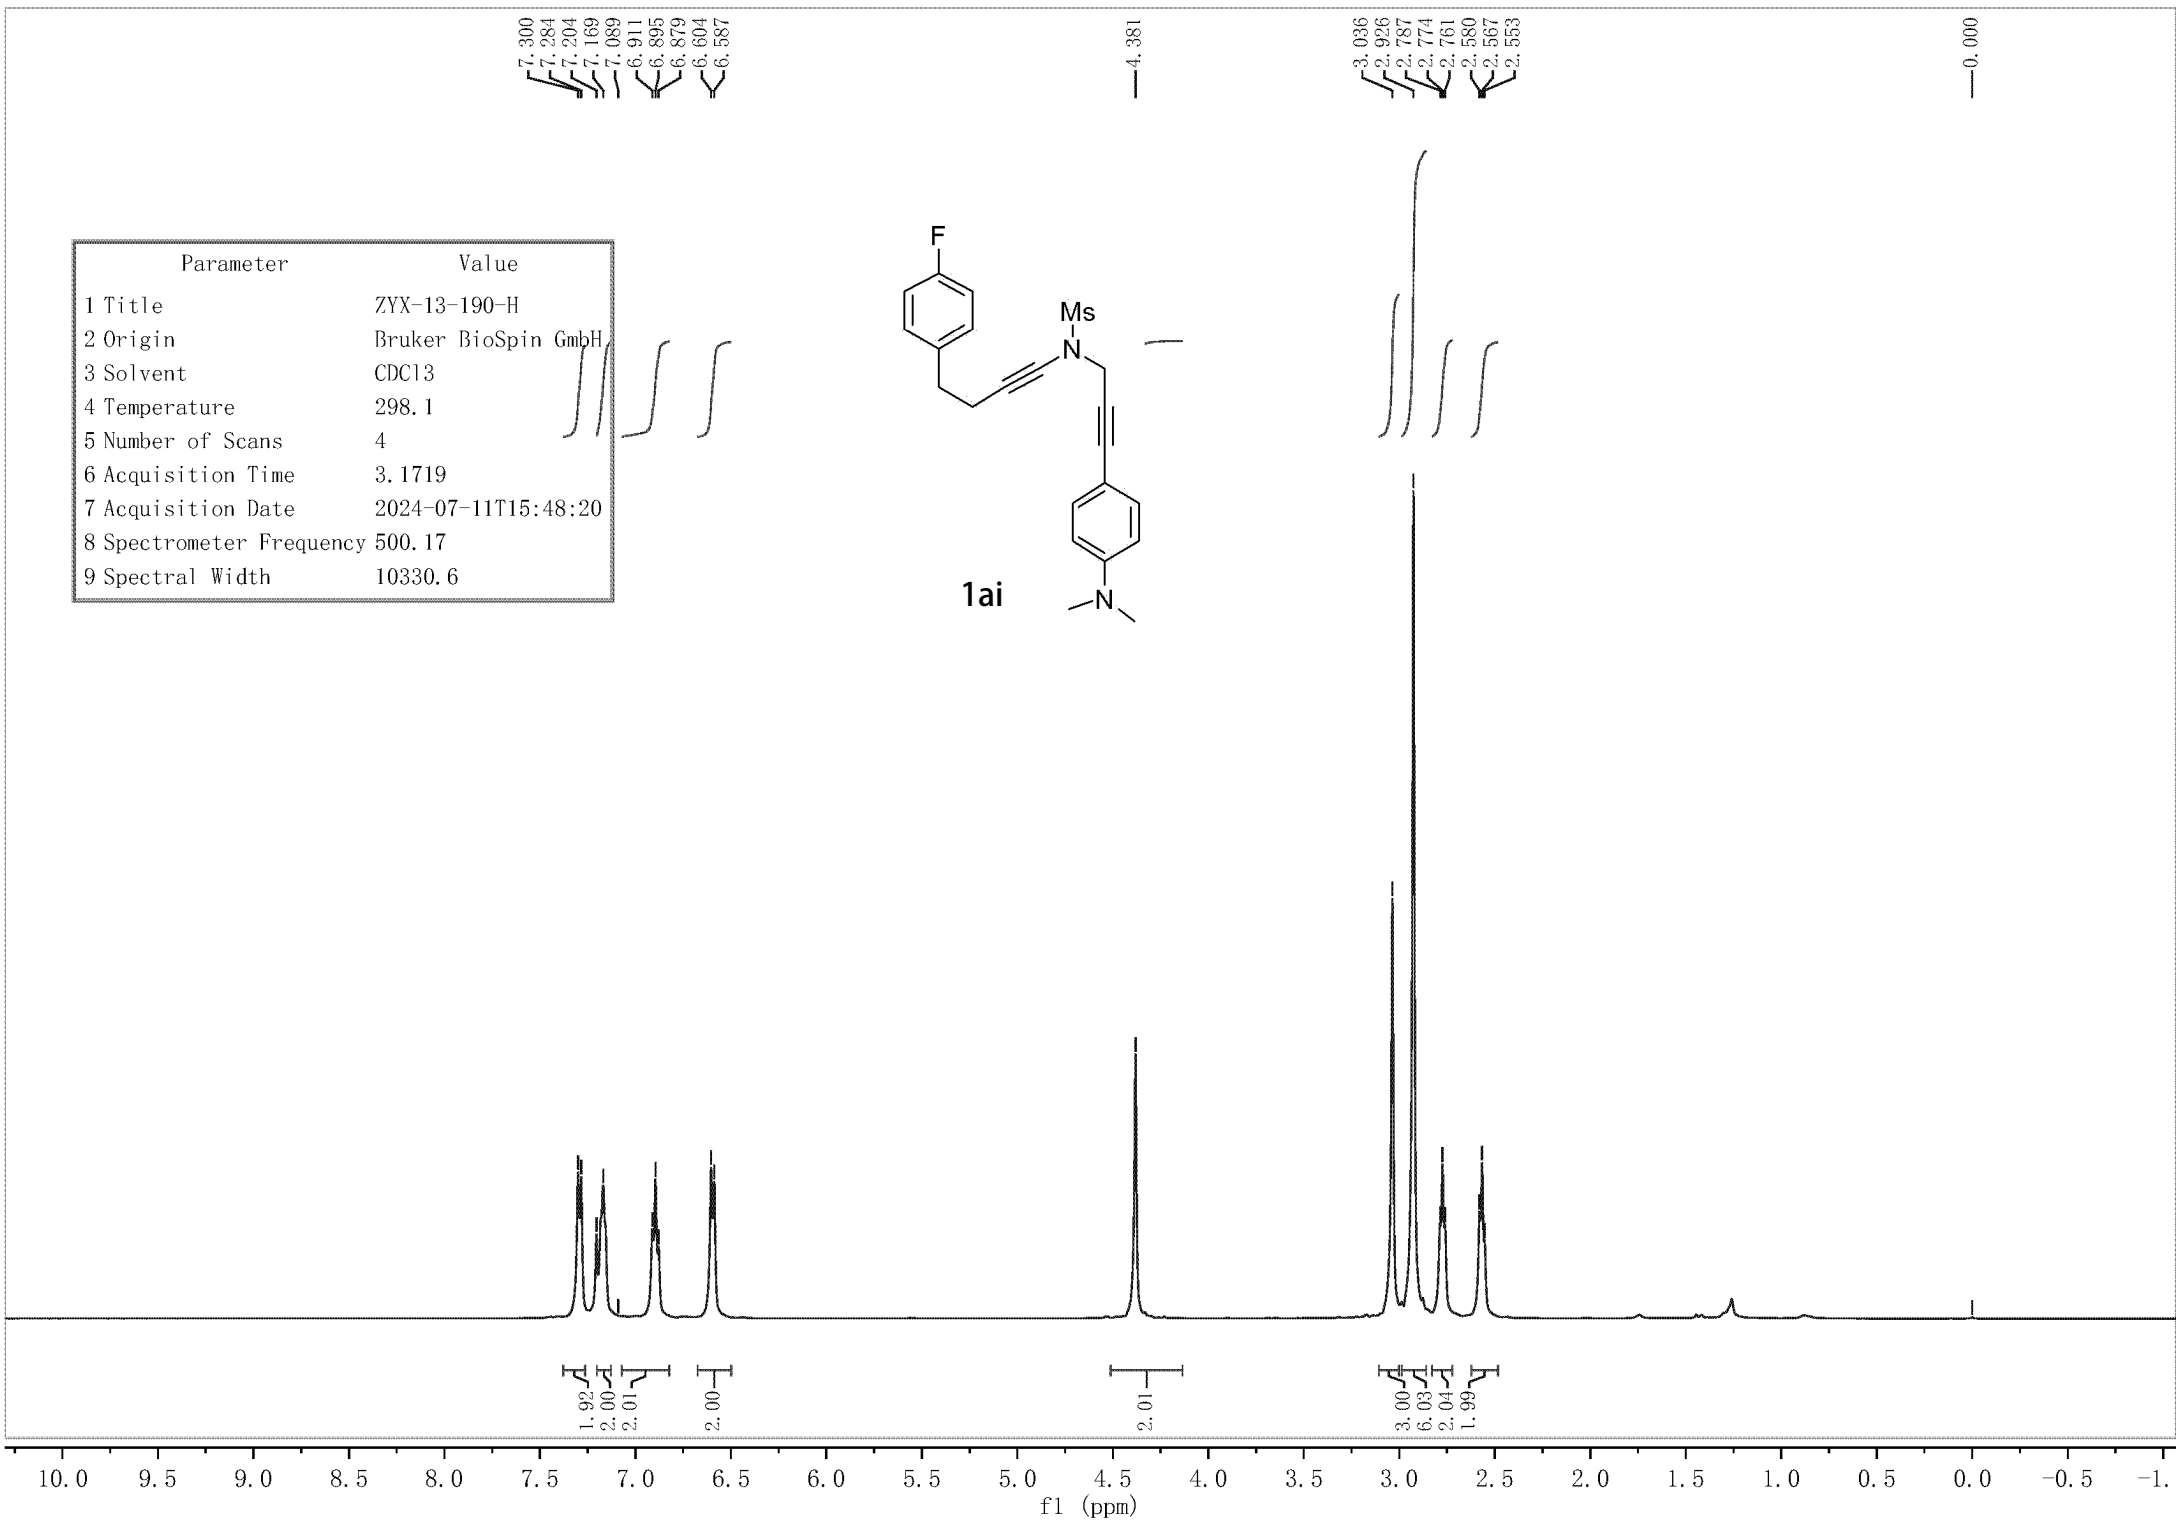

| Parameter                | Value               |
|--------------------------|---------------------|
| 1 Title                  | ZYX-13-190-C        |
| 2 Origin                 | Bruker BioSpin GmbH |
| 3 Solvent                | CDCl3               |
| 4 Temperature            | 298.2               |
| 5 Number of Scans        | 13                  |
| 6 Acquisition Time       | 1.1010              |
| 7 Acquisition Date       | 2024-07-11T15:53:39 |
| 8 Spectrometer Frequency | 125.77              |
| 9 Spectral Width         | 29761.9             |

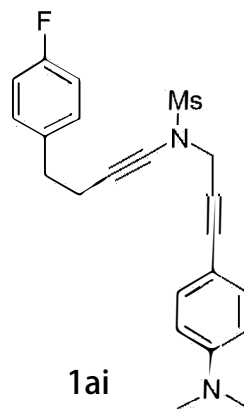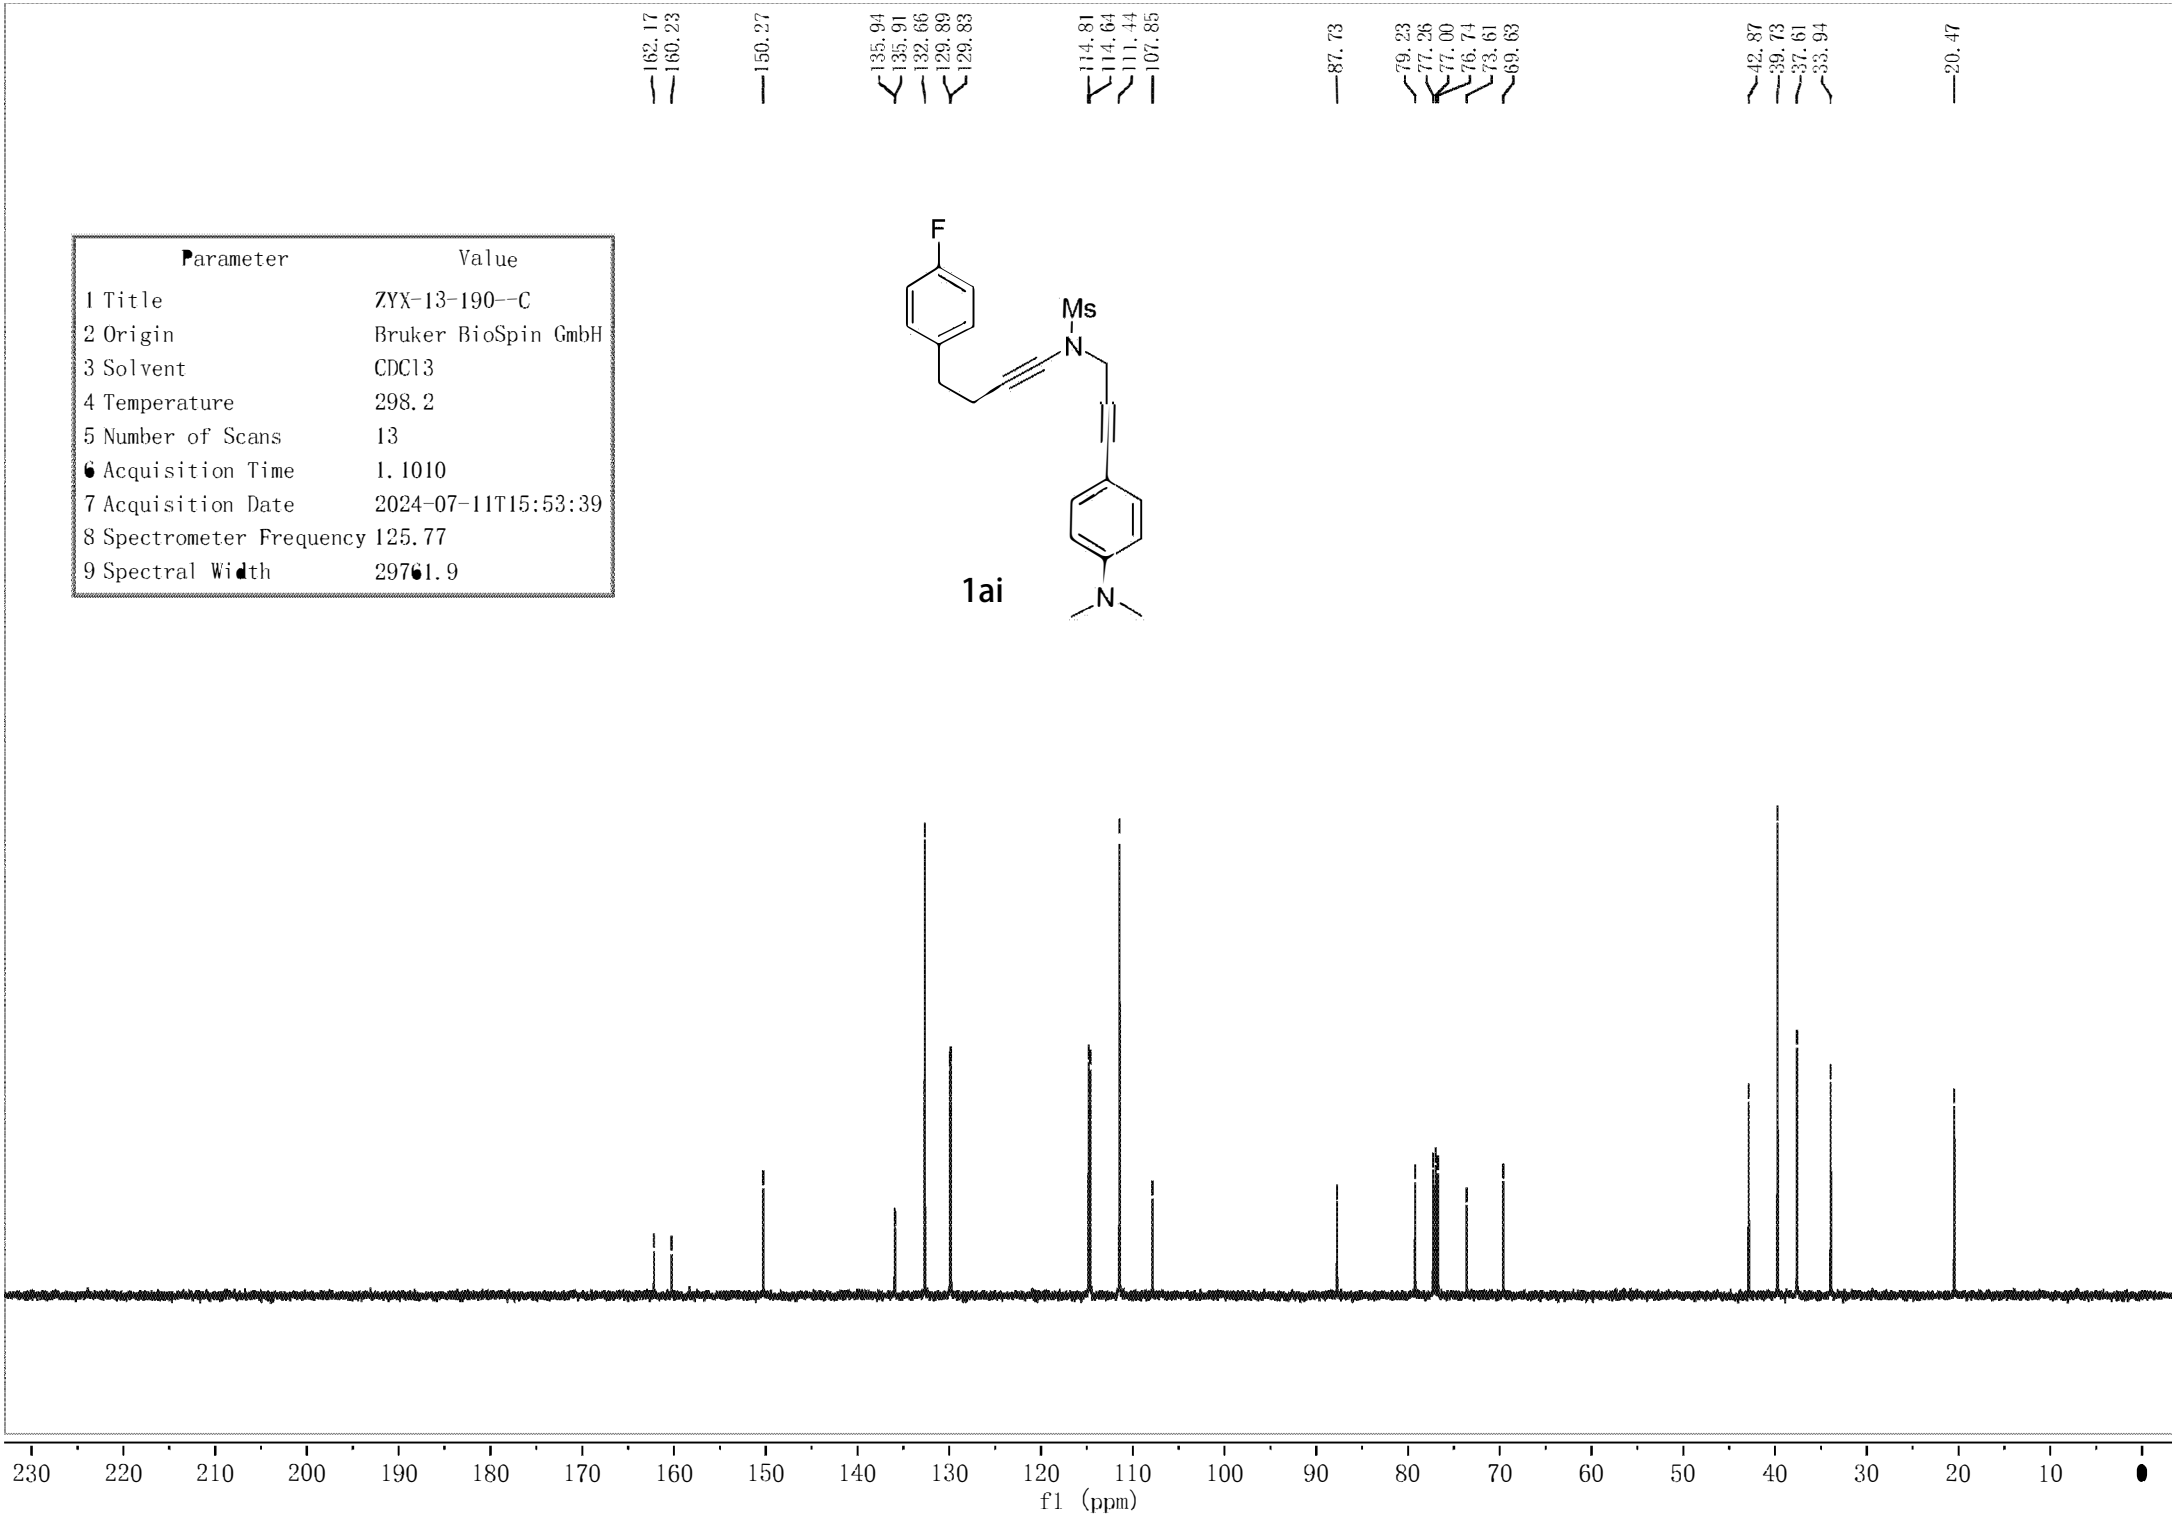

132.665  
129.889  
129.827

114.806  
114.638  
111.442

57.3  
42.731  
39.613  
33.937

20.466

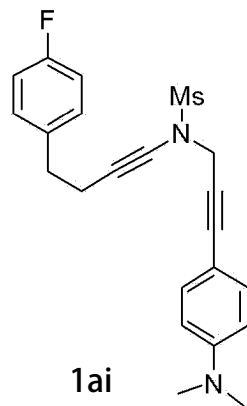

| Parameter                | Value               |
|--------------------------|---------------------|
| 1 Title                  | ZYX-13-190-DEPT     |
| 2 Origin                 | Bruker BioSpin GmbH |
| 3 Solvent                | CDC13               |
| 4 Temperature            | 298.3               |
| 5 Number of Scans        | 12                  |
| 6 Acquisition Time       | 1.1010              |
| 7 Acquisition Date       | 2024-07-11T15:55:19 |
| 8 Spectrometer Frequency | 125.77              |
| 9 Spectral Width         | 29761.9             |

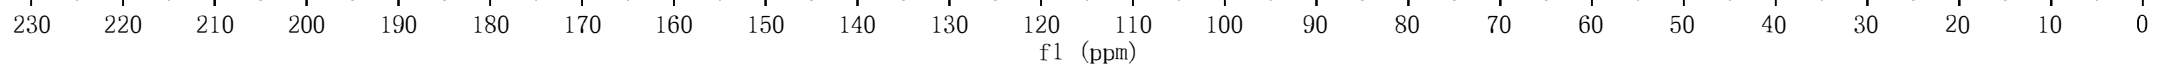

| Parameter                | Value               |
|--------------------------|---------------------|
| 1 Title                  | ZYX-13-190-F        |
| 2 Origin                 | Bruker BioSpin GmbH |
| 3 Solvent                | CDCl3               |
| 4 Temperature            | 296.3               |
| 5 Number of Scans        | 13                  |
| 6 Acquisition Time       | 0.7340              |
| 7 Acquisition Date       | 2024-07-14T20:55:46 |
| 8 Spectrometer Frequency | 376.31              |
| 9 Spectral Width         | 89285.7             |

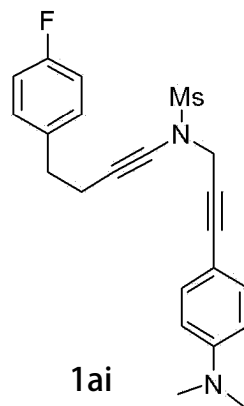

—116.975

10 0 -10 -20 -30 -40 -50 -60 -70 -80 -90 -100 -110 -120 -130 -140 -150 -160 -170 -180 -190 -200 -210

f1 (ppm)

| Parameter                | Value               |
|--------------------------|---------------------|
| 1 Title                  | ysh-1-45-h          |
| 2 Origin                 | Bruker BioSpin GmbH |
| 3 Solvent                | CDC13               |
| 4 Temperature            | 298.0               |
| 5 Number of Scans        | 6                   |
| 6 Acquisition Time       | 4.0894              |
| 7 Acquisition Date       | 2024-06-27T20:49:42 |
| 8 Spectrometer Frequency | 400.13              |
| 9 Spectral Width         | 8012.8              |

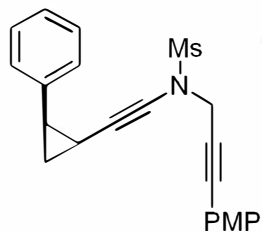

1aj

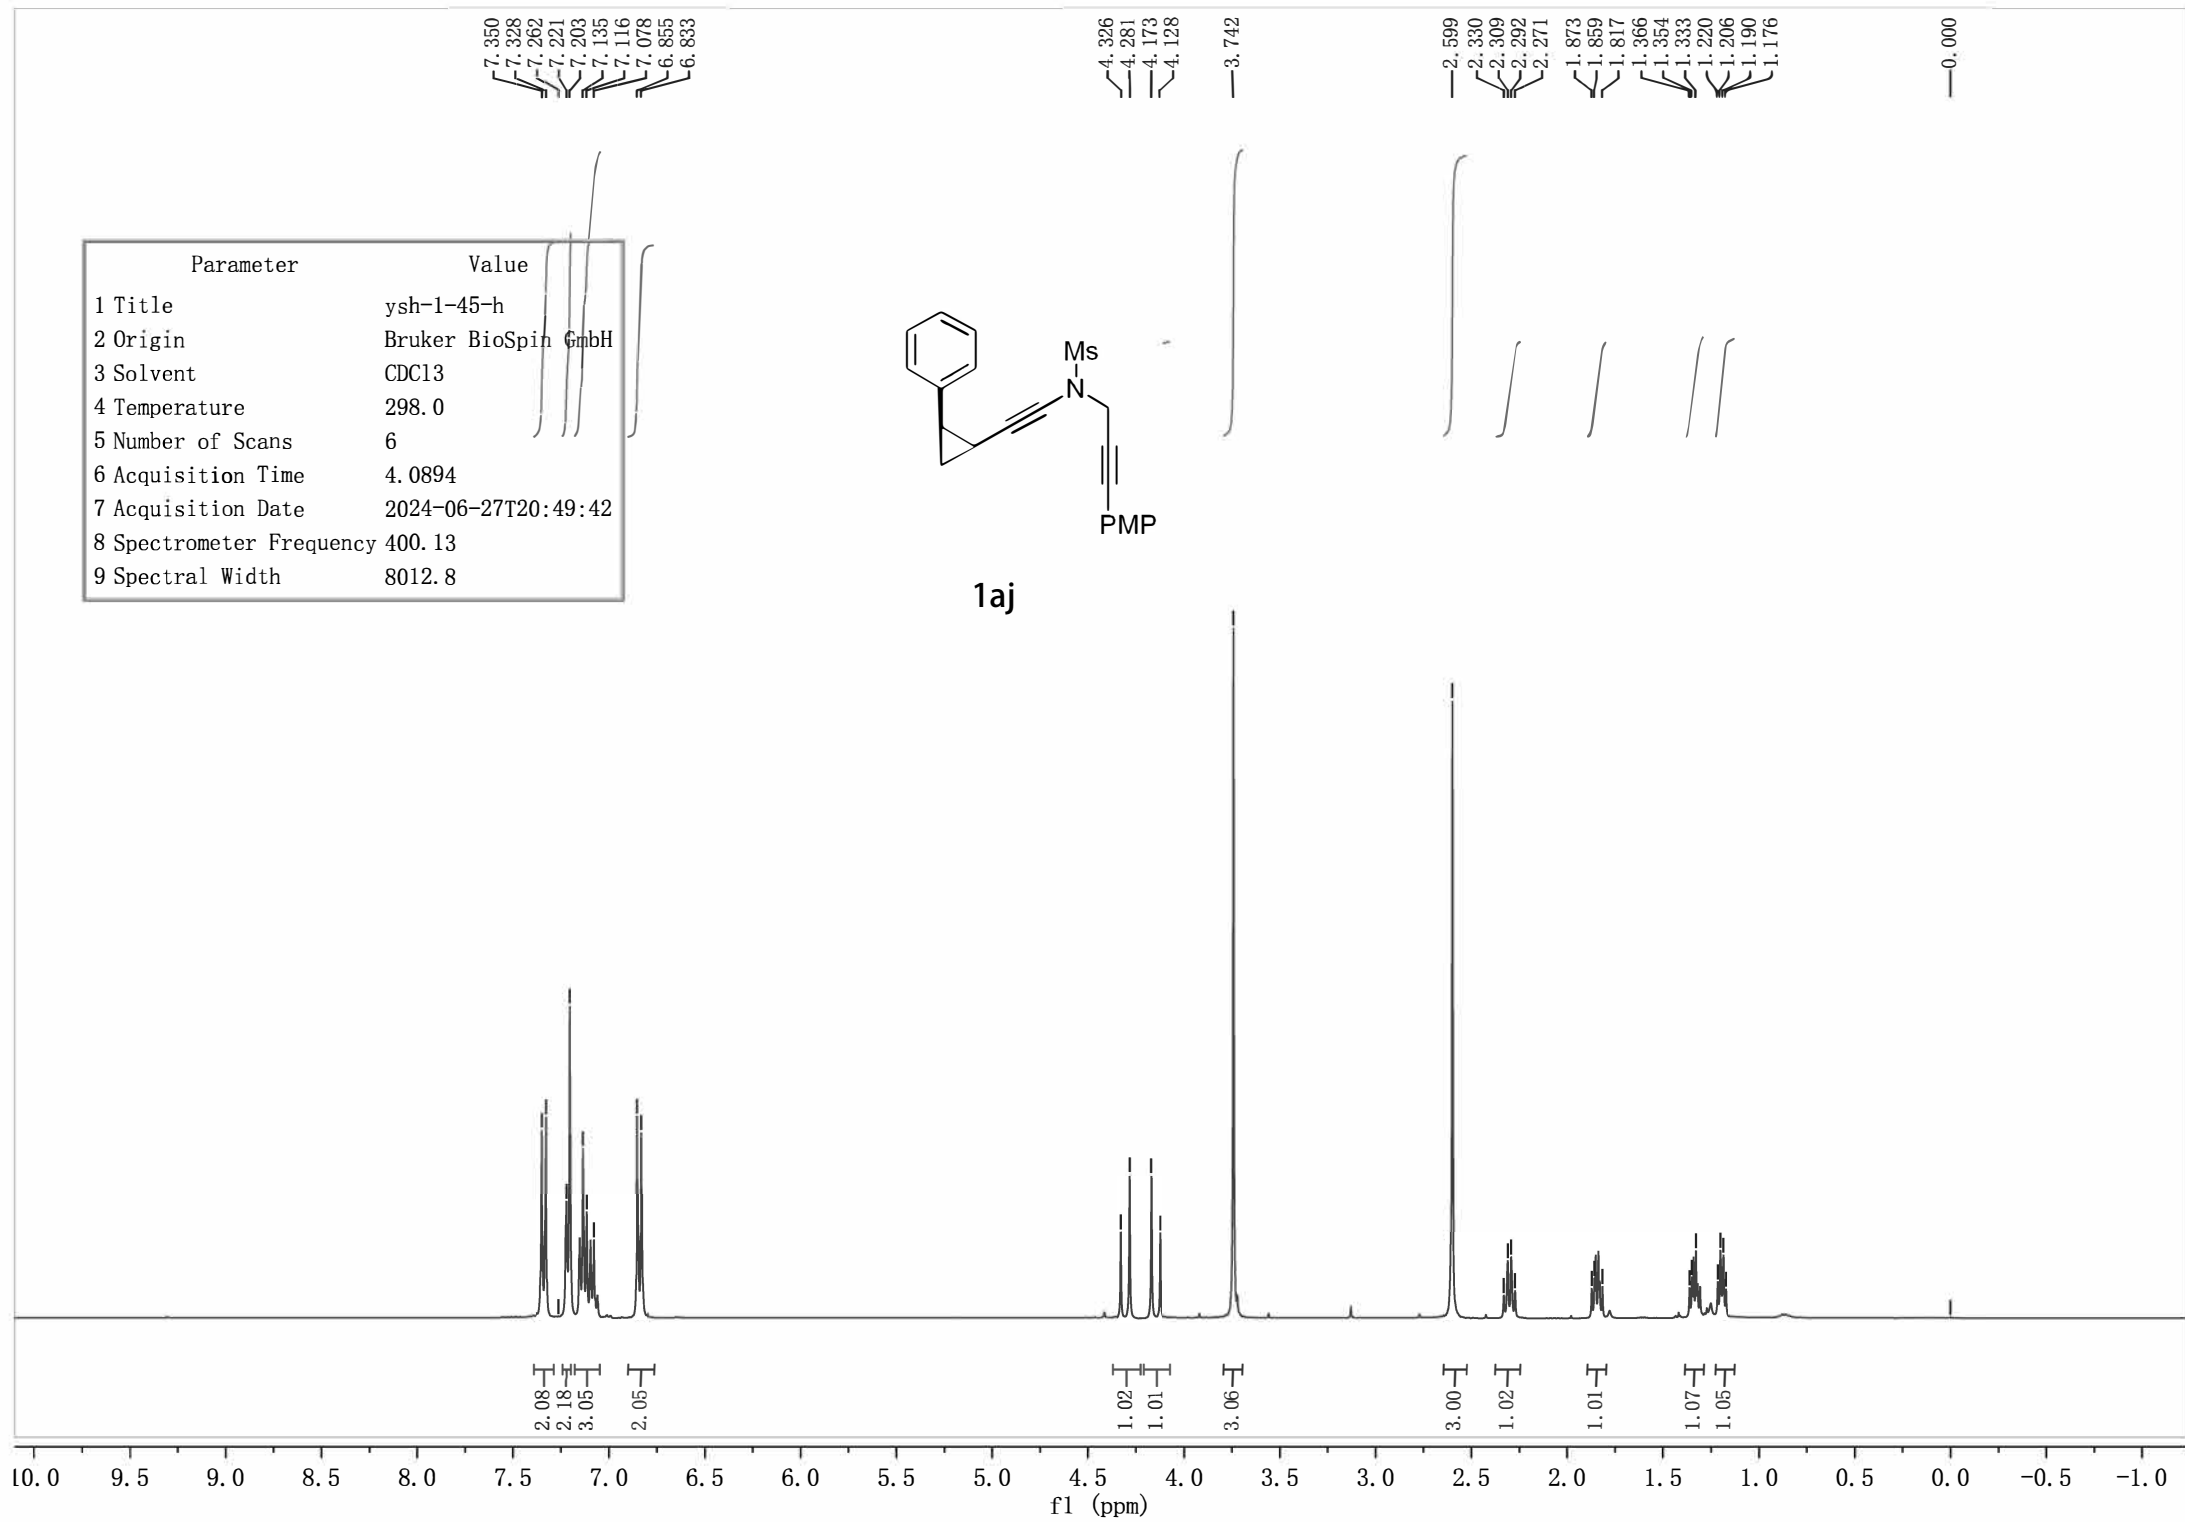

| Parameter                | Value               |
|--------------------------|---------------------|
| 1 Title                  | ysh-1-45-c          |
| 2 Origin                 | Bruker BioSpin GmbH |
| 3 Solvent                | CDCl3               |
| 4 Temperature            | 300.0               |
| 5 Number of Scans        | 7                   |
| 6 Acquisition Time       | 1.3631              |
| 7 Acquisition Date       | 2024-06-27T20:51:15 |
| 8 Spectrometer Frequency | 100.61              |
| 9 Spectral Width         | 24038.5             |

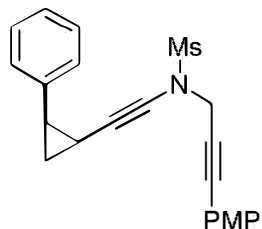

1aj

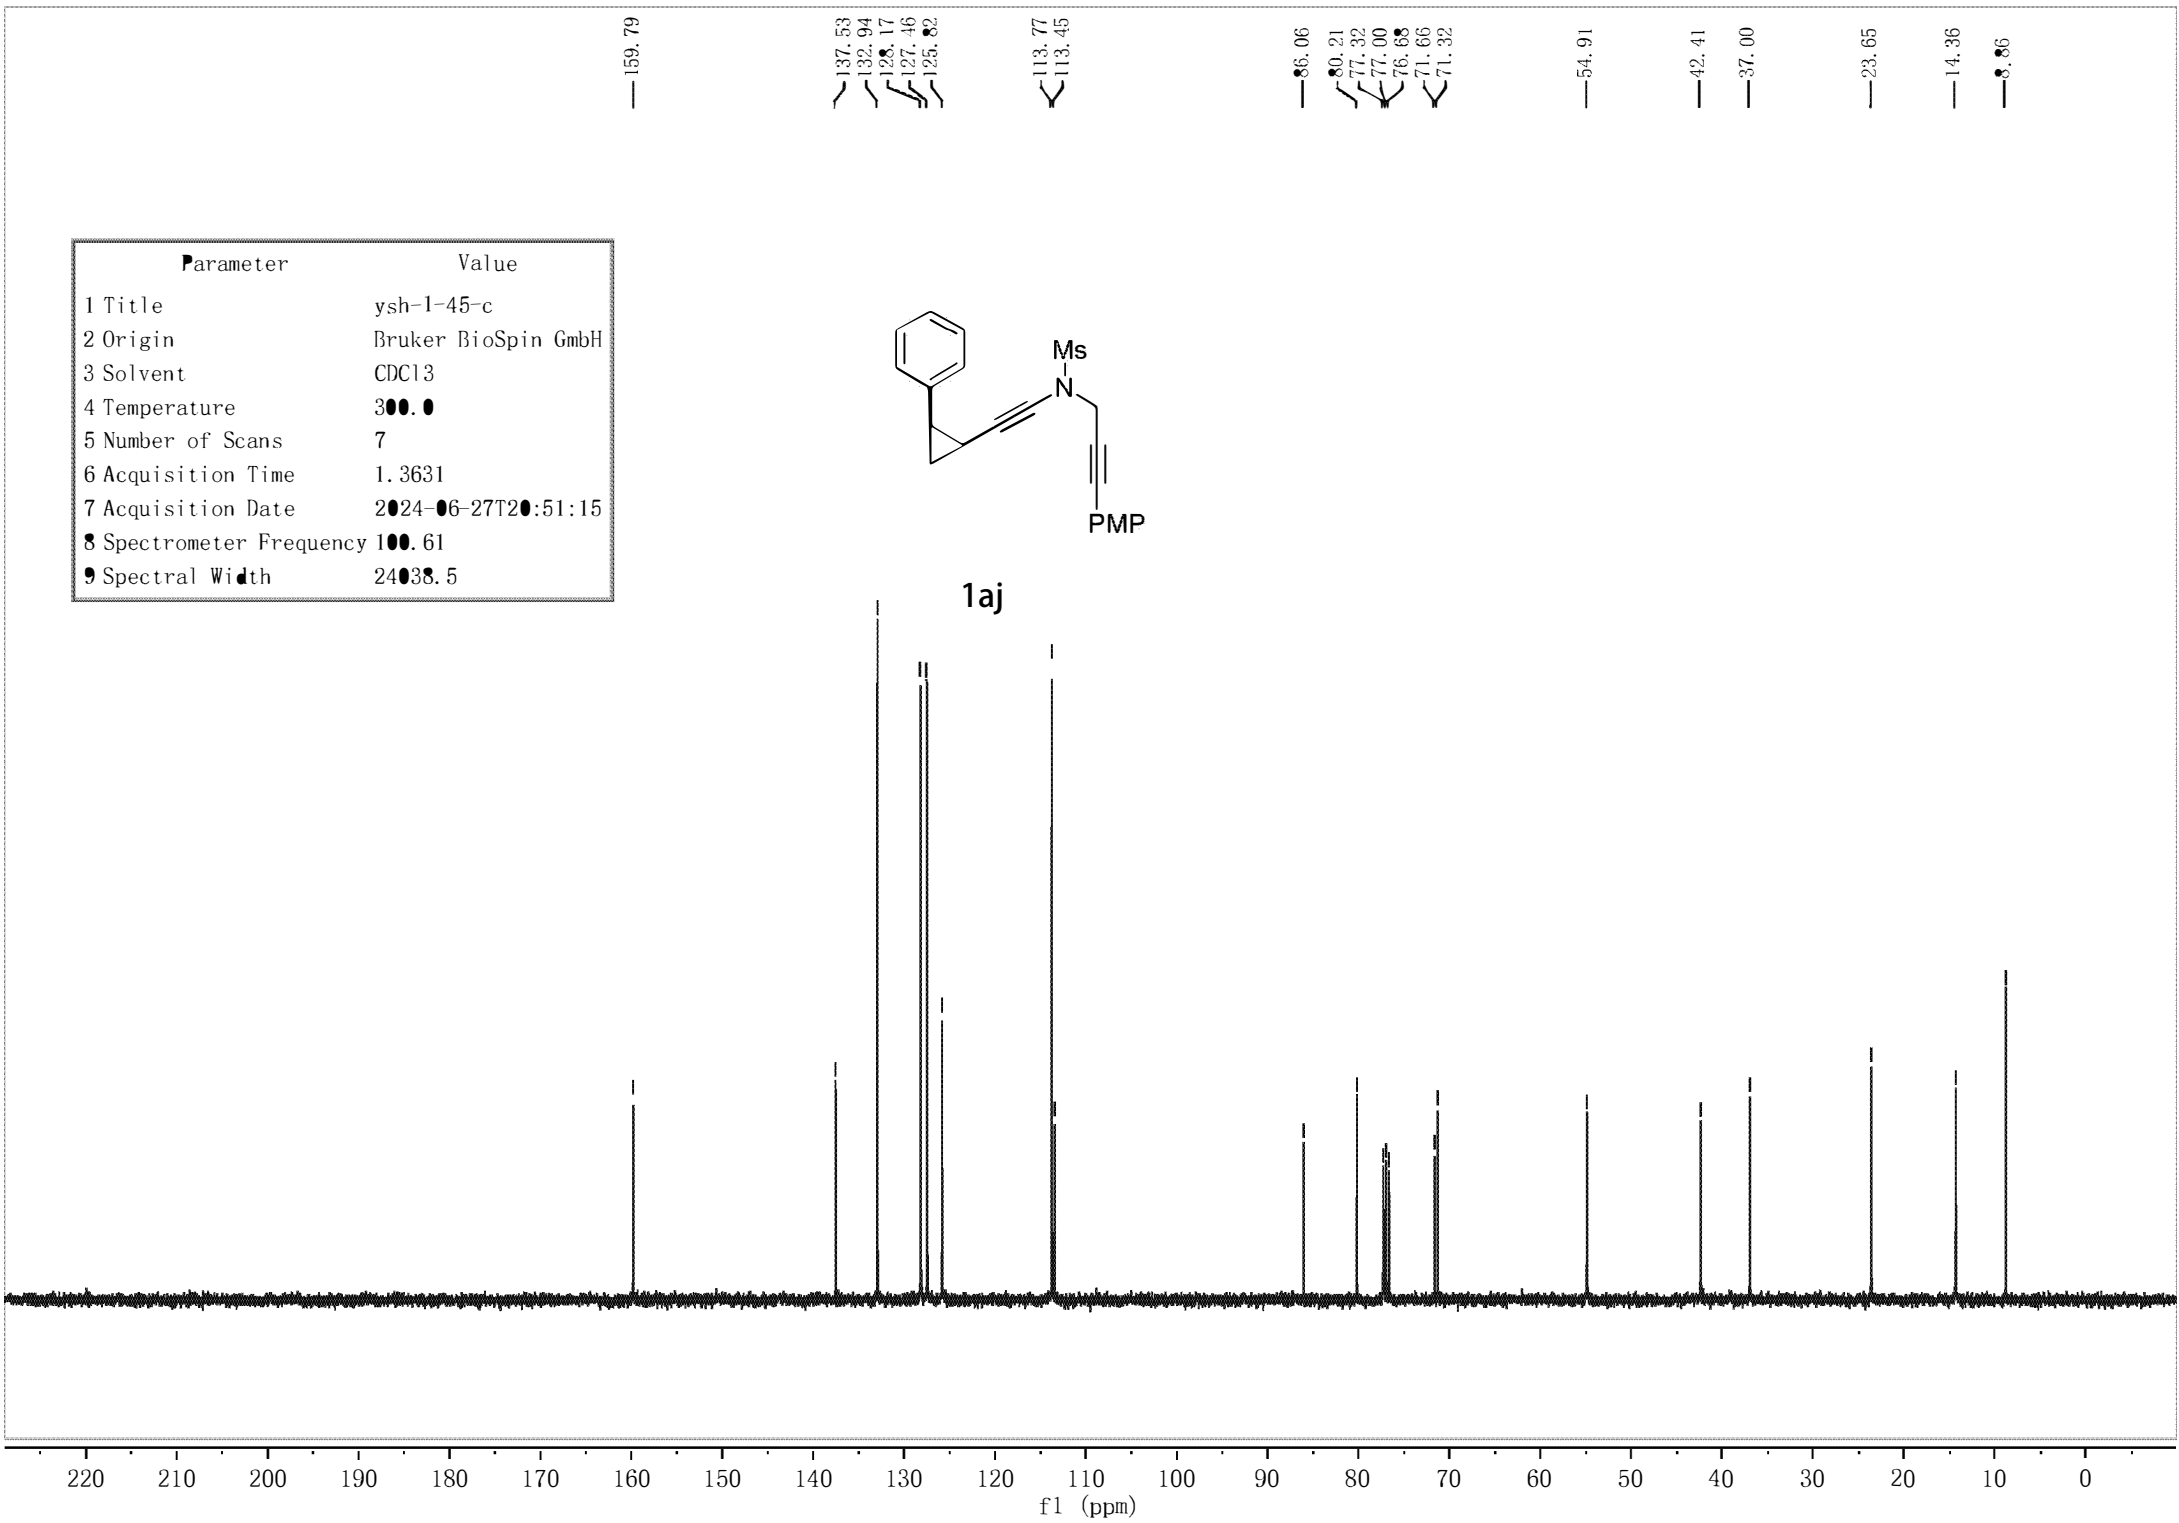

| Parameter                | Value               |
|--------------------------|---------------------|
| 1 Title                  | ysh-1-45-dept       |
| 2 Origin                 | Bruker BioSpin GmbH |
| 3 Solvent                | CDCl3               |
| 4 Temperature            | 300.0               |
| 5 Number of Scans        | 16                  |
| 6 Acquisition Time       | 1.3631              |
| 7 Acquisition Date       | 2024-06-27T20:52:39 |
| 8 Spectrometer Frequency | 100.61              |
| 9 Spectral Width         | 24038.5             |

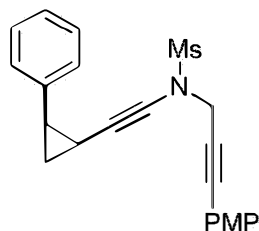

132.94  
128.18  
127.47  
125.83  
113.77  
77.20  
54.92  
42.41  
37.00  
23.65  
14.36  
8.86

210 200 190 180 170 160 150 140 130 120 110 100 90 80 70 60 50 40 30 20 10 0 -10

f1 (ppm)



8.061  
7.902  
7.893  
7.886  
7.878  
7.829  
7.807  
7.796  
7.779  
7.595  
7.576  
7.480  
7.460  
7.441  
7.425  
7.392  
7.389  
7.374  
7.370  
7.355  
7.351  
7.319  
7.316  
7.300  
7.297  
7.282  
7.278  
7.176  
7.154  
6.393  
6.371

| Parameter                | Value               |
|--------------------------|---------------------|
| 1 Title                  | zyx-3-132--H        |
| 2 Origin                 | Bruker BioSpin GmbH |
| 3 Solvent                | CDCl <sub>3</sub>   |
| 4 Temperature            | 298.0               |
| 5 Number of Scans        | 10                  |
| 6 Acquisition Time       | 4.0894              |
| 7 Acquisition Date       | 2021-11-30T16:03:12 |
| 8 Spectrometer Frequency | 400.13              |
| 9 Spectral Width         | 8012.8              |

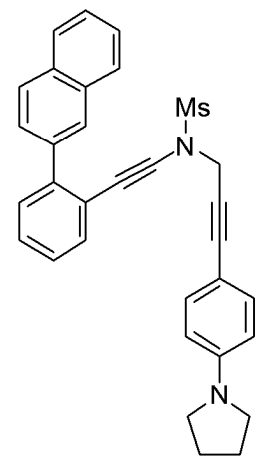

3a

3.249  
3.232  
3.216  
2.770  
1.975  
1.959  
1.942

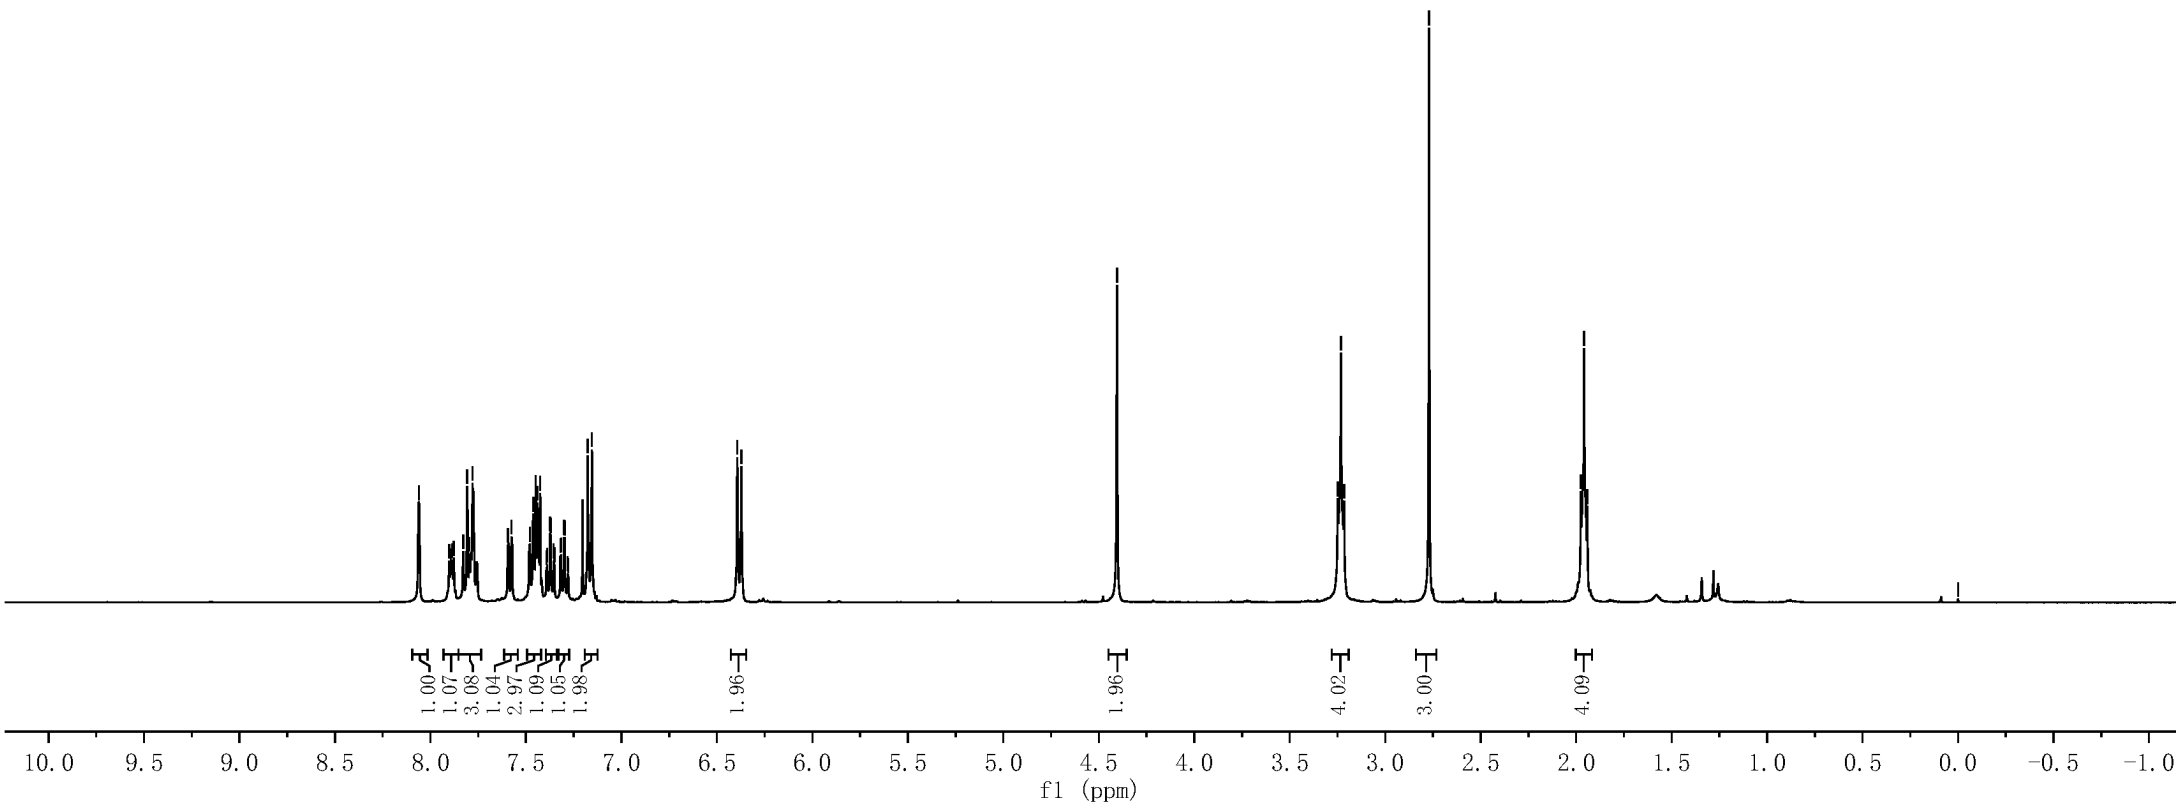

| Parameter                | Value               |
|--------------------------|---------------------|
| 1 Title                  | ZYX-3-132--C        |
| 2 Origin                 | Bruker BioSpin GmbH |
| 3 Solvent                | CDCl3               |
| 4 Temperature            | 300.0               |
| 5 Number of Scans        | 36                  |
| 6 Acquisition Time       | 1.3631              |
| 7 Acquisition Date       | 2021-11-29T16:08:54 |
| 8 Spectrometer Frequency | 100.61              |
| 9 Spectral Width         | 24038.5             |

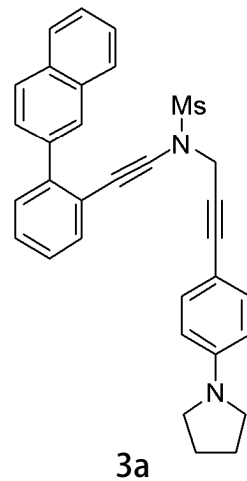

147.90  
143.34  
138.01  
133.00  
128.29  
127.51  
127.48  
127.42  
126.98

111.23  
107.09

88.46  
84.52  
78.99  
77.32  
77.00  
76.68  
70.95

47.37  
43.23  
38.31

25.33

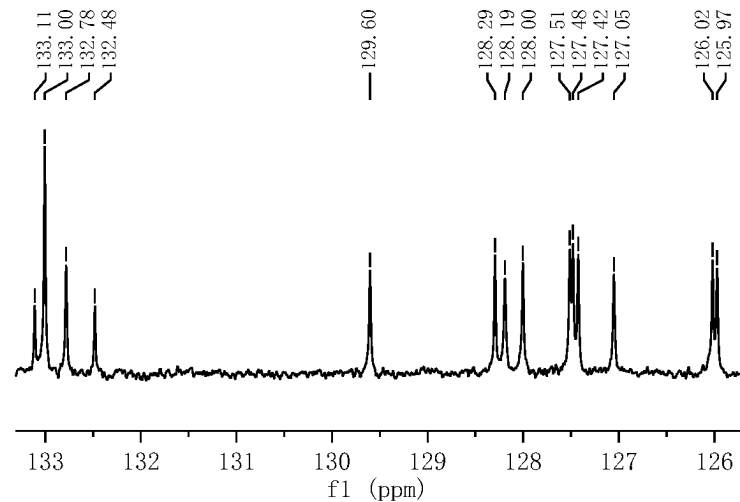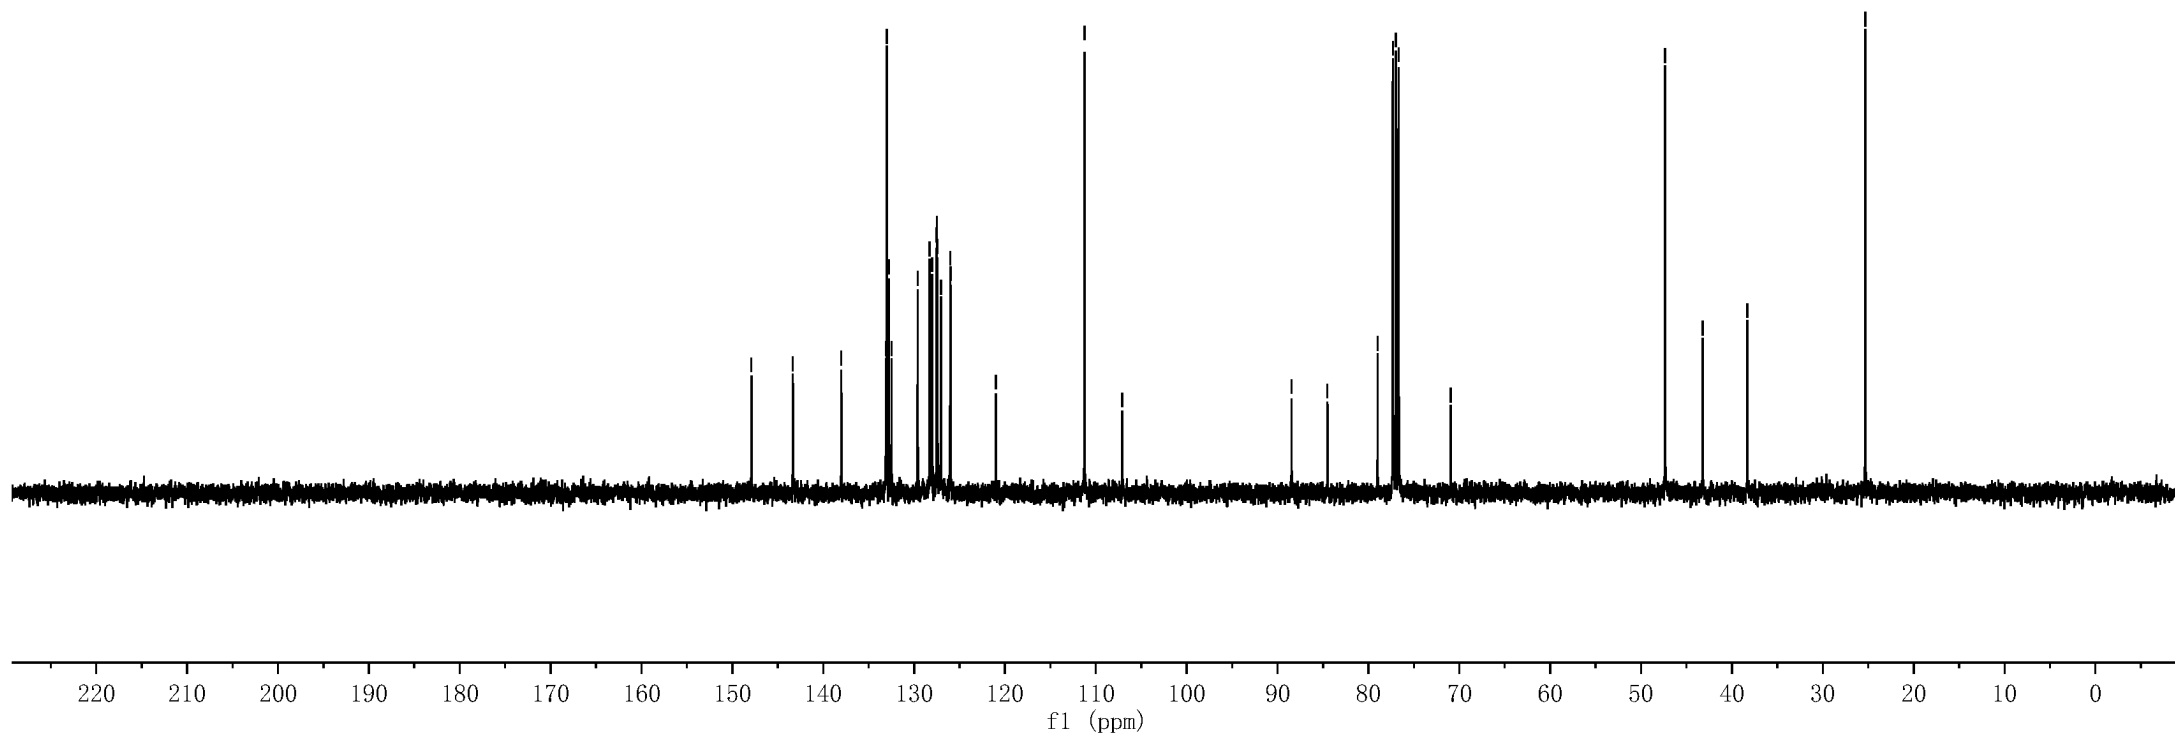

| Parameter                | Value               |
|--------------------------|---------------------|
| 1 Title                  | ZYX-3-132--C        |
| 2 Origin                 | Bruker BioSpin GmbH |
| 3 Solvent                | CDCl3               |
| 4 Temperature            | 300.0               |
| 5 Number of Scans        | 36                  |
| 6 Acquisition Time       | 1.3631              |
| 7 Acquisition Date       | 2021-11-29T16:08:54 |
| 8 Spectrometer Frequency | 100.61              |
| 9 Spectral Width         | 24038.5             |

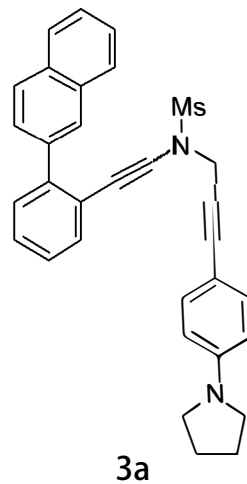

133.00  
132.78  
129.60  
128.30  
128.19  
128.00  
127.51  
127.48  
127.43  
127.05  
126.02  
125.97

111.23

47.36

43.23

38.31

25.33

133.00

132.78

129.60

128.30

128.19

128.00

127.51

127.48

127.43

127.05

126.02

125.97

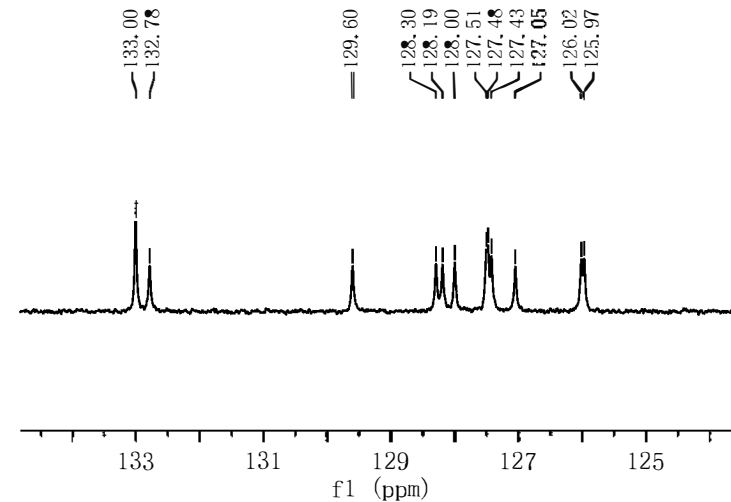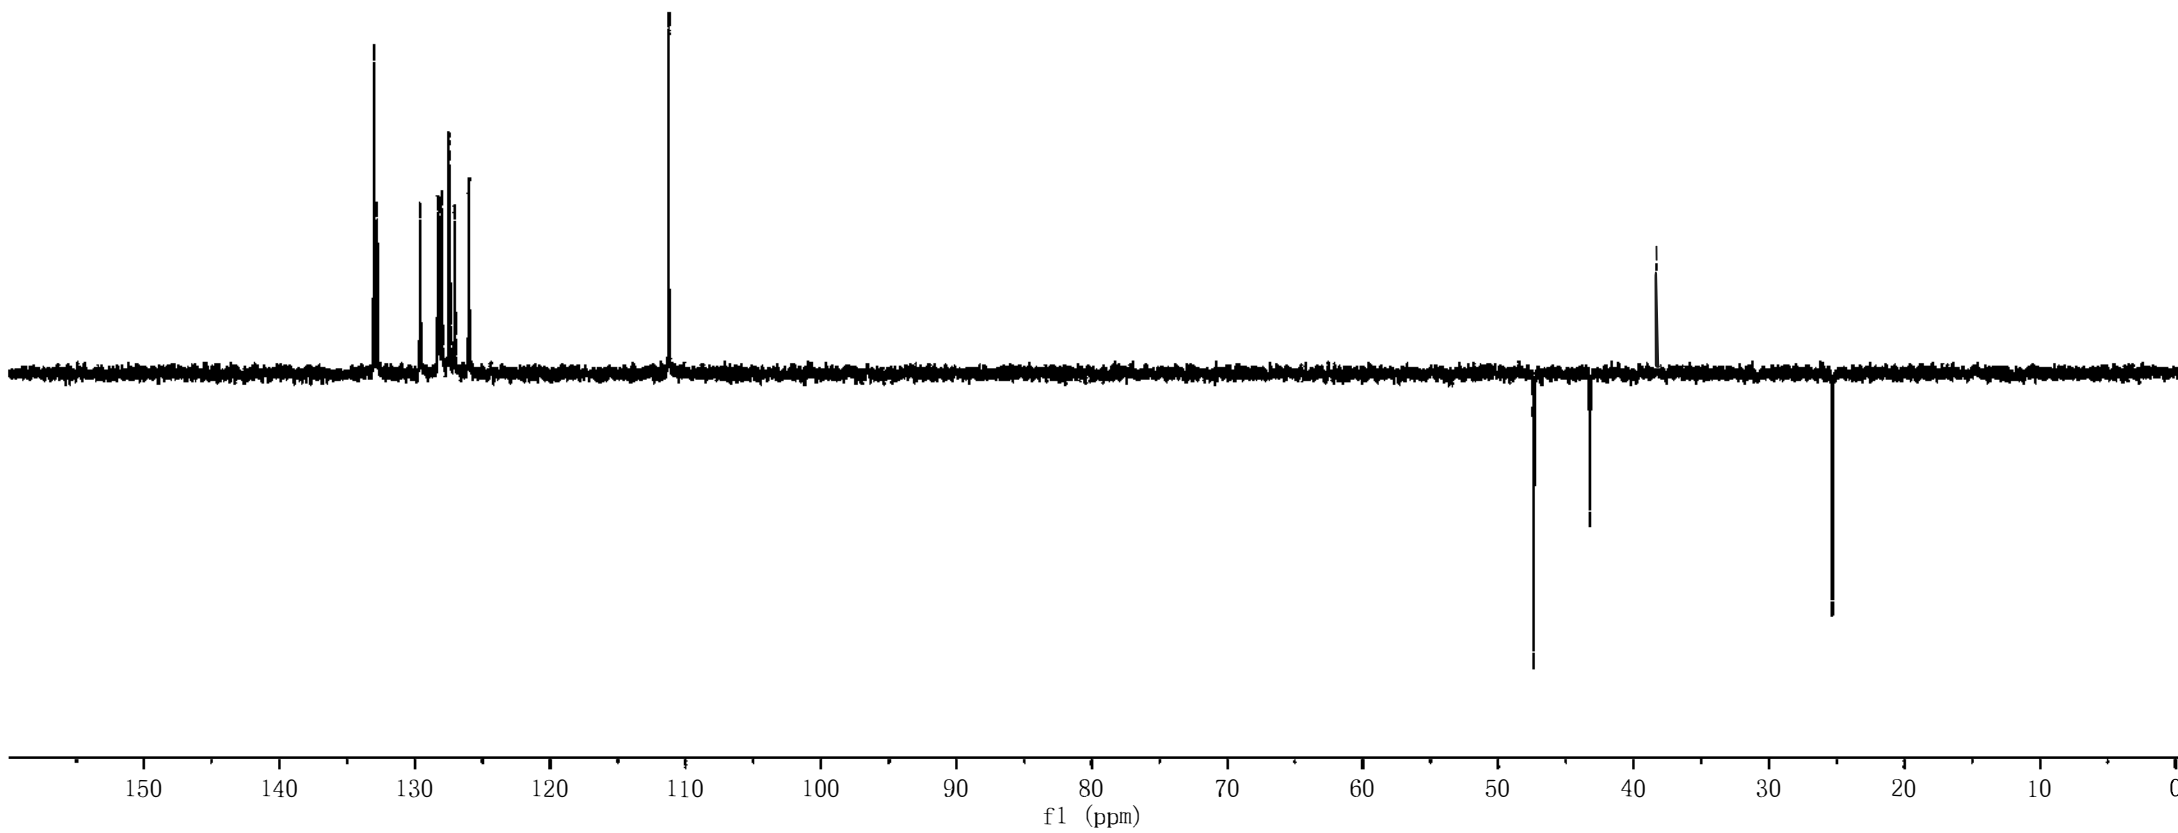

8.041  
7.904  
7.891  
7.881  
7.801  
7.790  
7.779  
7.771  
7.558  
7.537  
7.502  
7.481  
7.458  
7.446  
7.436  
7.360  
7.344  
7.341  
7.322  
7.292  
7.273  
7.270  
7.255  
7.218  
6.987  
6.966  
6.859  
6.839  
6.361  
6.339

| Parameter                | Value               |
|--------------------------|---------------------|
| 1 Title                  | ZYX-3-70-H          |
| 2 Origin                 | Bruker Biospin GmbH |
| 3 Solvent                | CDCl <sub>3</sub>   |
| 4 Temperature            | 298.0               |
| 5 Number of Scans        | 8                   |
| 6 Acquisition Time       | 4.0894              |
| 7 Acquisition Date       | 2021-11-29T16:20:31 |
| 8 Spectrometer Frequency | 400.13              |
| 9 Spectral Width         | 8012.8              |

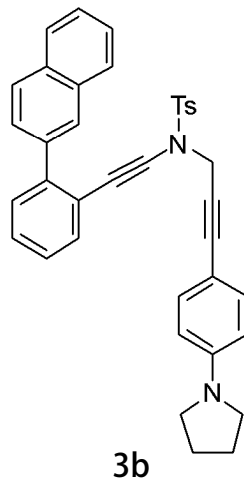

3.248  
3.232  
3.216  
2.205  
1.980  
1.963  
1.947  
0.000

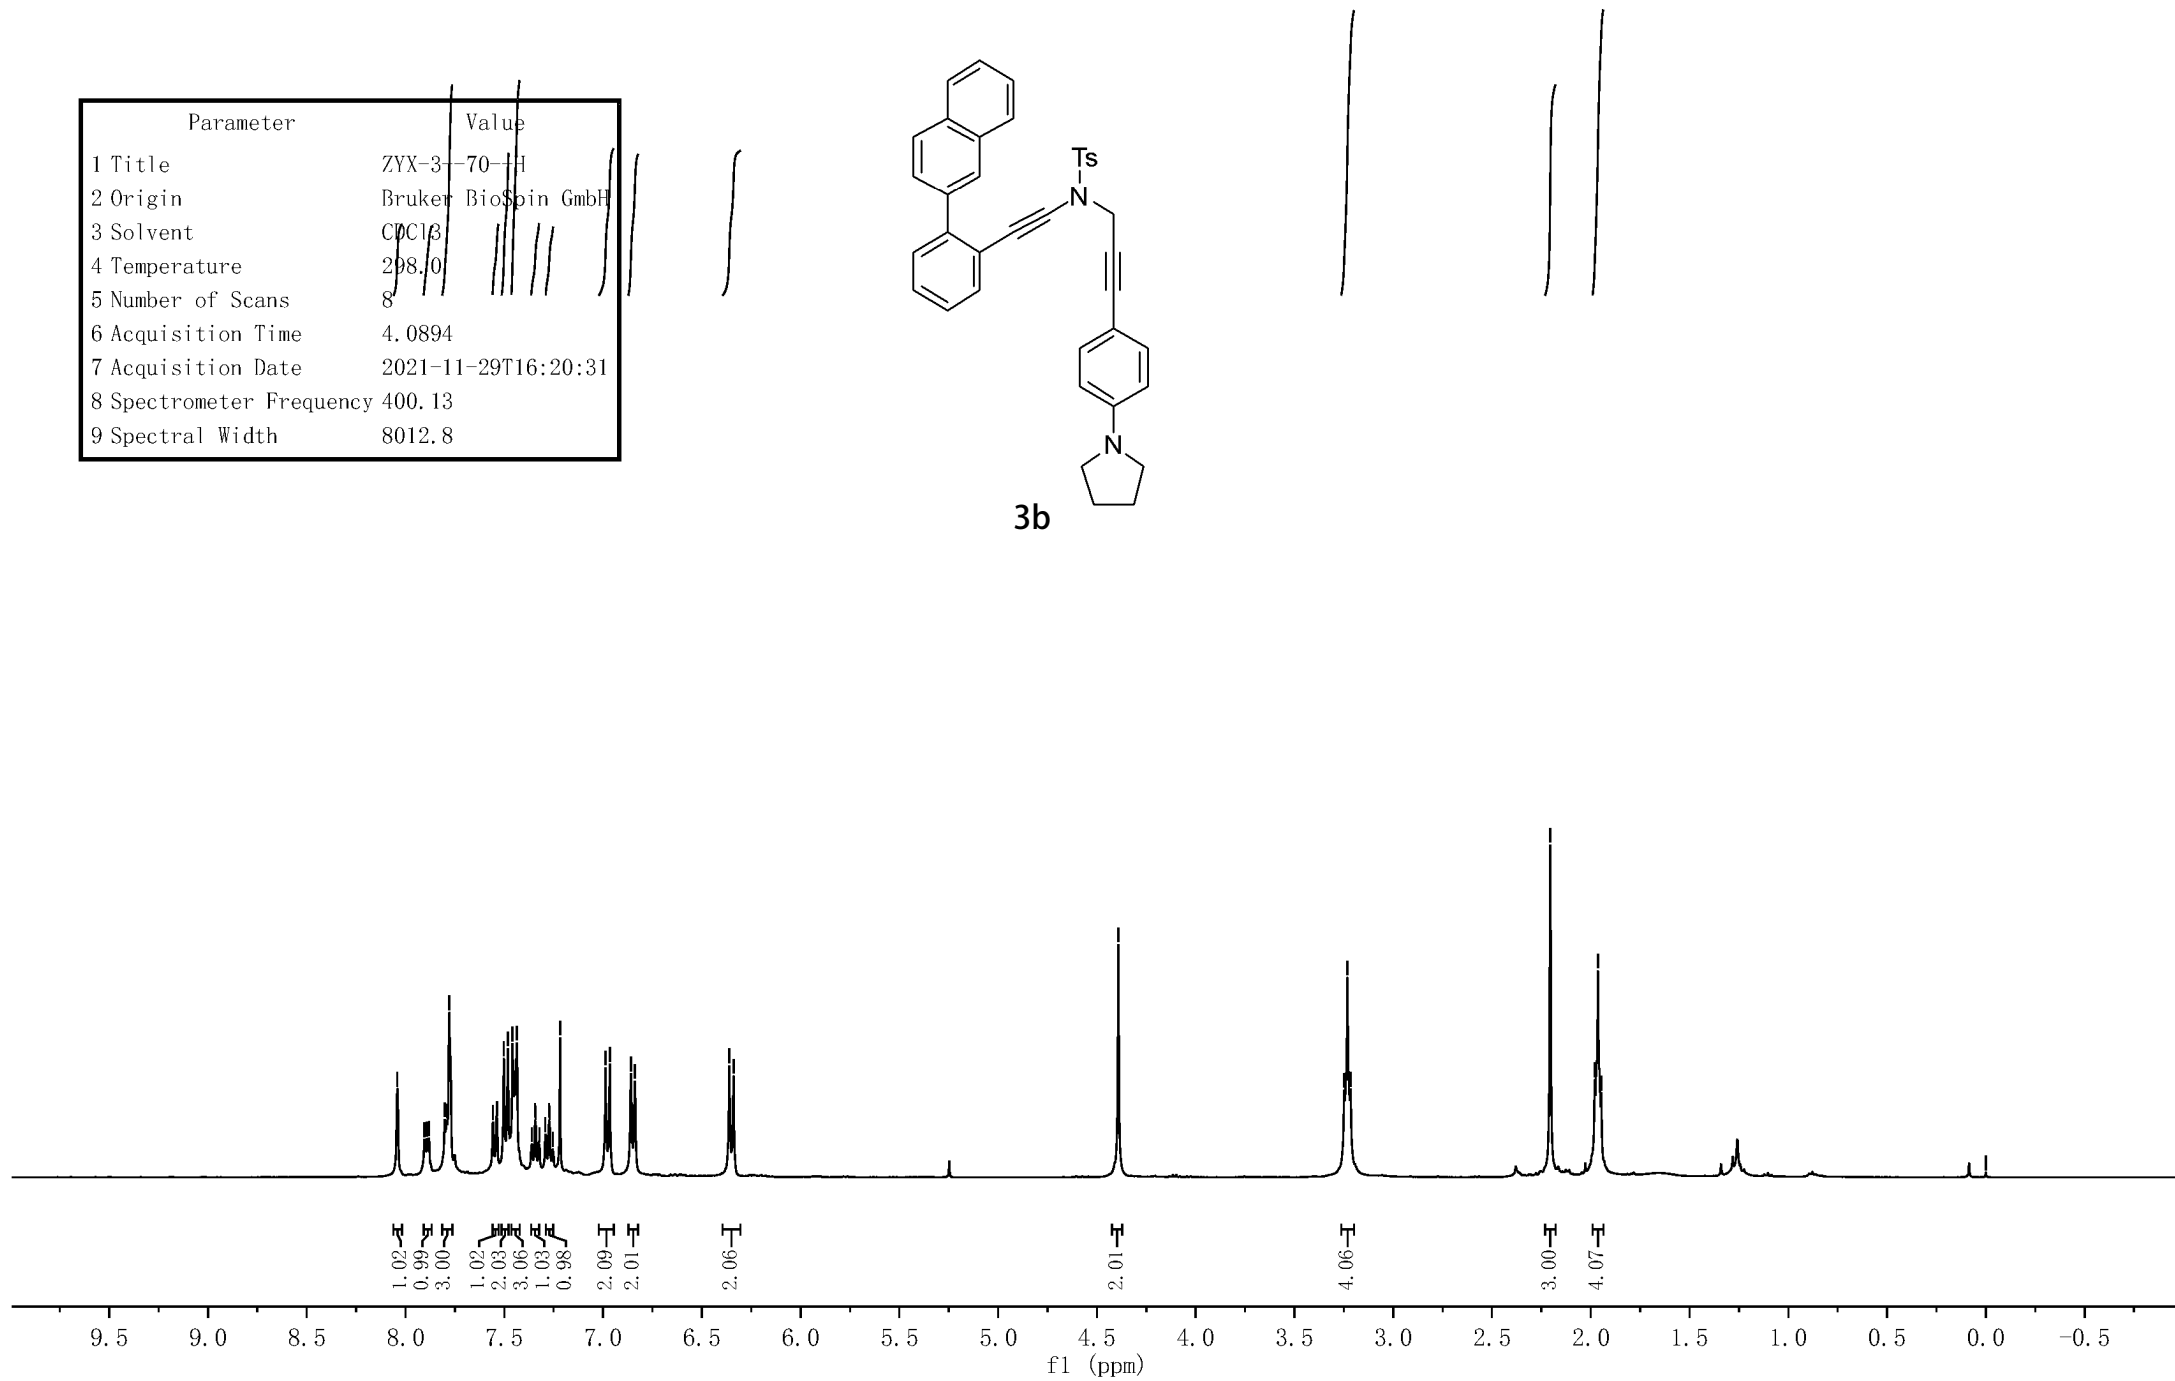

| Parameter                | Value               |
|--------------------------|---------------------|
| 1 Title                  | ZYX-3--70--C        |
| 2 Origin                 | Bruker BioSpin GmbH |
| 3 Solvent                | CDCl3               |
| 4 Temperature            | 300.0               |
| 5 Number of Scans        | 53                  |
| 6 Acquisition Time       | 1.3631              |
| 7 Acquisition Date       | 2021-11-29T16:21:56 |
| 8 Spectrometer Frequency | 100.61              |
| 9 Spectral Width         | 24038.5             |

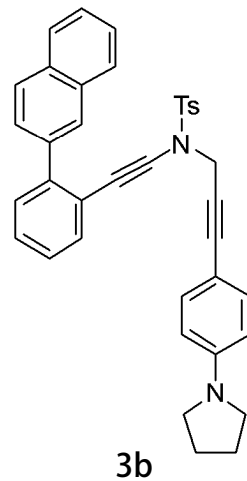

147.66  
144.25  
142.91  
132.94  
132.91  
129.21  
128.34  
127.87  
127.78  
127.62  
127.53  
127.44  
126.97  
125.93  
125.88  
107.68

87.85  
85.11  
78.63  
77.32  
77.00  
76.68  
70.74

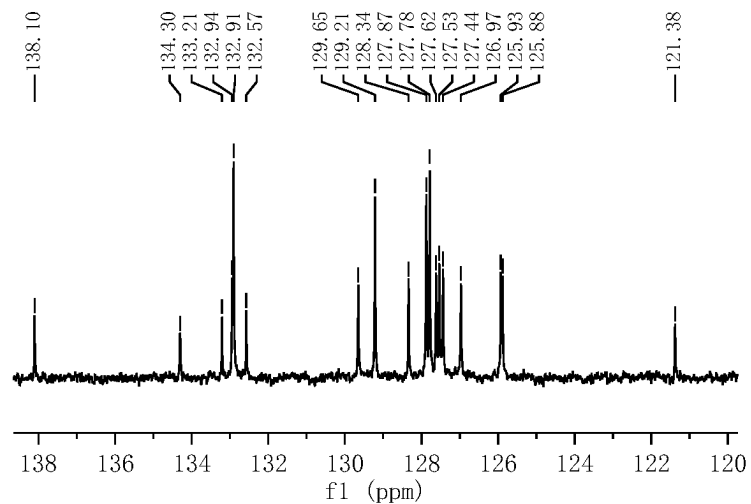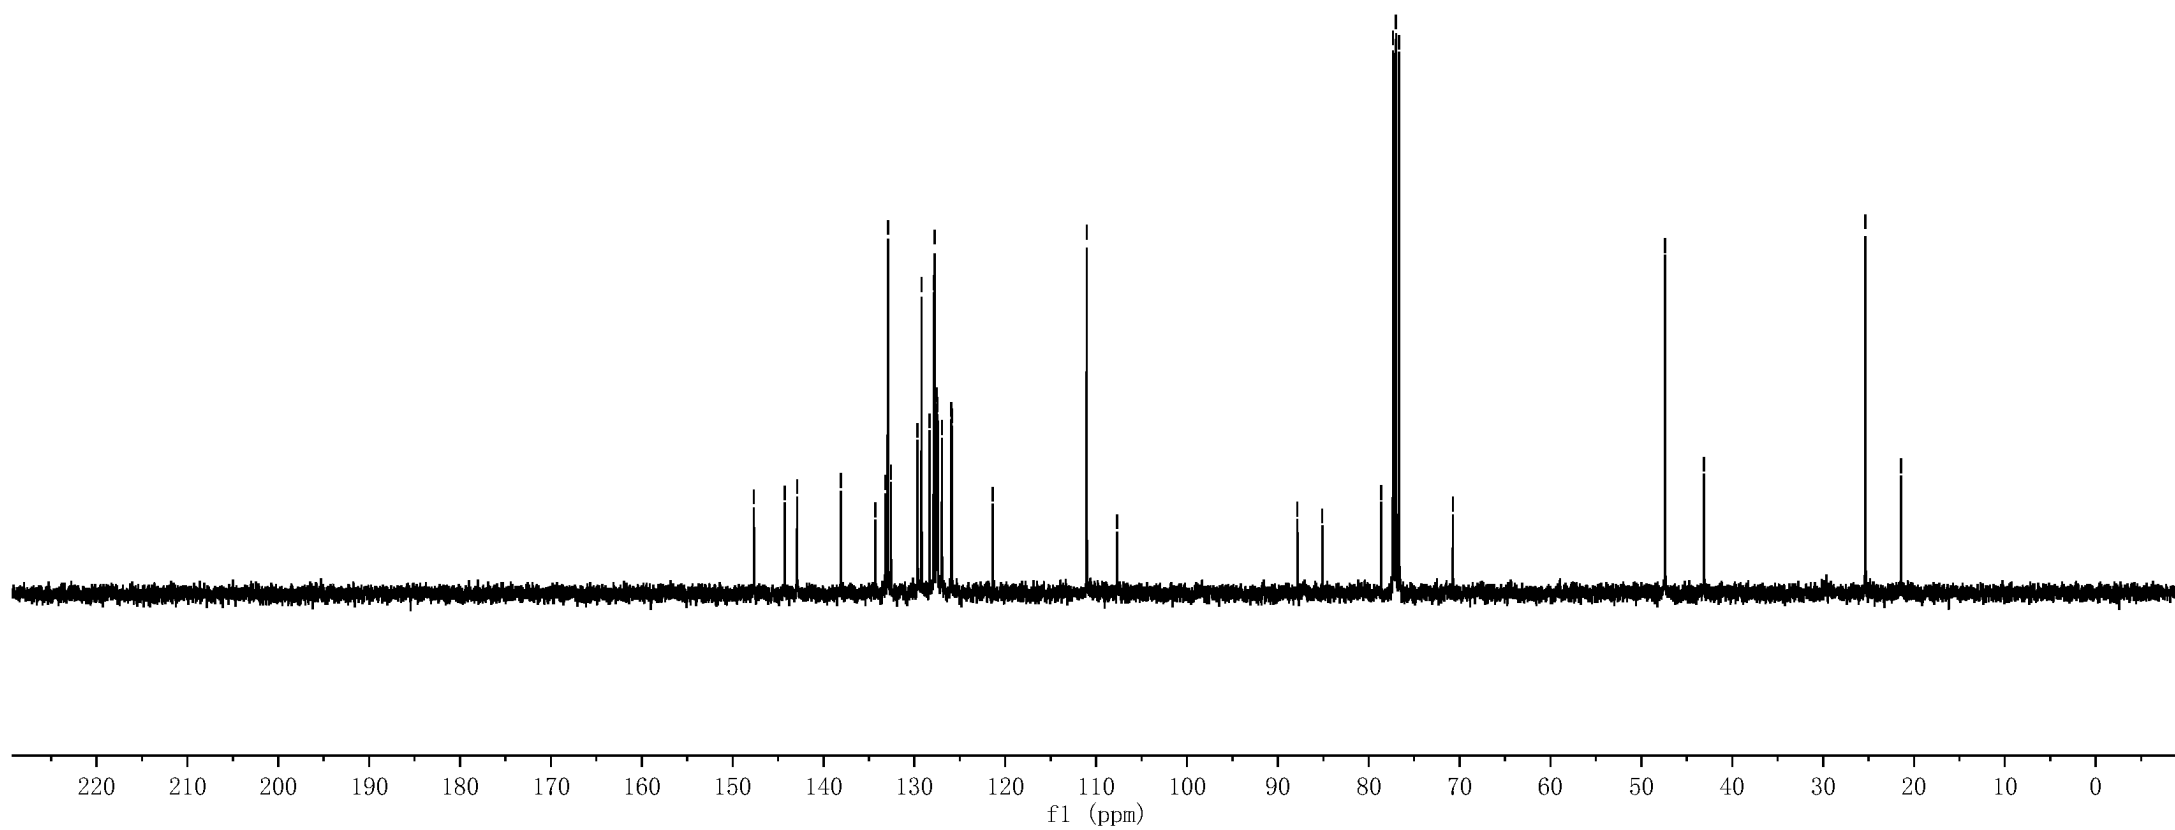

| Parameter                | Value               |
|--------------------------|---------------------|
| 1 Title                  | zyx-3-144-hh        |
| 2 Origin                 | Bruker BioSpir GmbH |
| 3 Solvent                | CDCl3               |
| 4 Temperature            | 298.0               |
| 5 Number of Scans        | 6                   |
| 6 Acquisition Time       | 4.0894              |
| 7 Acquisition Date       | 2021-12-02T16:22:59 |
| 8 Spectrometer Frequency | 400.13              |
| 9 Spectral Width         | 8012.8              |

8.026  
7.895  
7.883  
7.849  
7.771  
7.744  
7.706  
7.608  
7.590  
7.547  
7.529  
7.452  
7.434  
7.339  
7.319  
7.275  
7.205  
7.066  
7.027  
7.011  
6.991  
6.356  
6.335

4.422

3.324  
3.217  
3.125

2.022  
1.947  
1.863

0.000

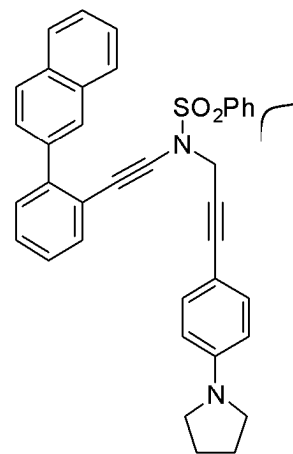

3c

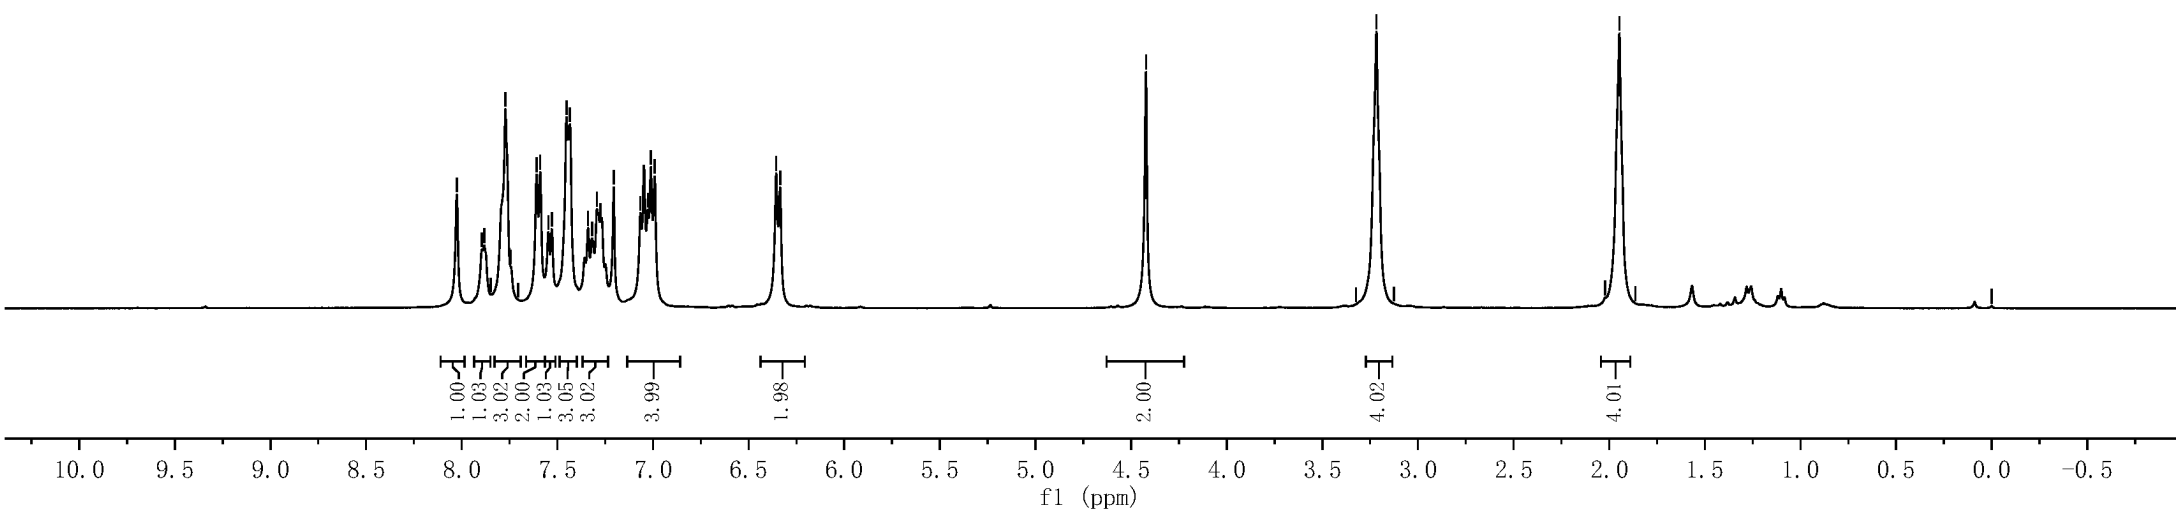

| Parameter                | Value               |
|--------------------------|---------------------|
| 1 Title                  | zyx-3-144-cc        |
| 2 Origin                 | Bruker BioSpin GmbH |
| 3 Solvent                | CDCl3               |
| 4 Temperature            | 300.0               |
| 5 Number of Scans        | 56                  |
| 6 Acquisition Time       | 1.3631              |
| 7 Acquisition Date       | 2021-12-02T16:24:05 |
| 8 Spectrometer Frequency | 100.61              |
| 9 Spectral Width         | 24038.5             |

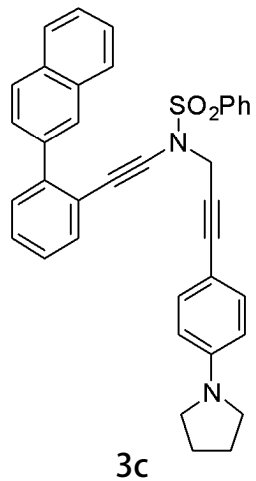

147.68  
142.94  
133.22  
132.92  
129.65  
128.49  
128.31  
127.94  
127.87  
127.75  
127.59  
127.54  
127.45  
125.97  
125.08  
107.52

88.00  
84.83  
78.54  
77.32  
77.00  
76.68  
70.84

47.35  
43.21

25.34

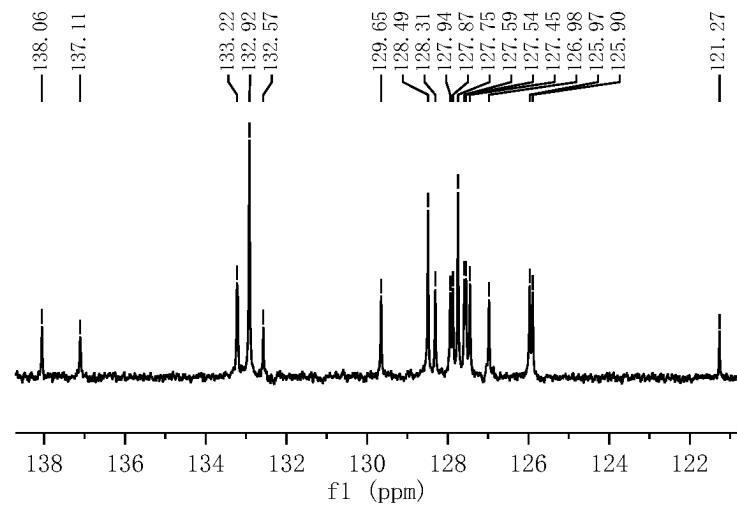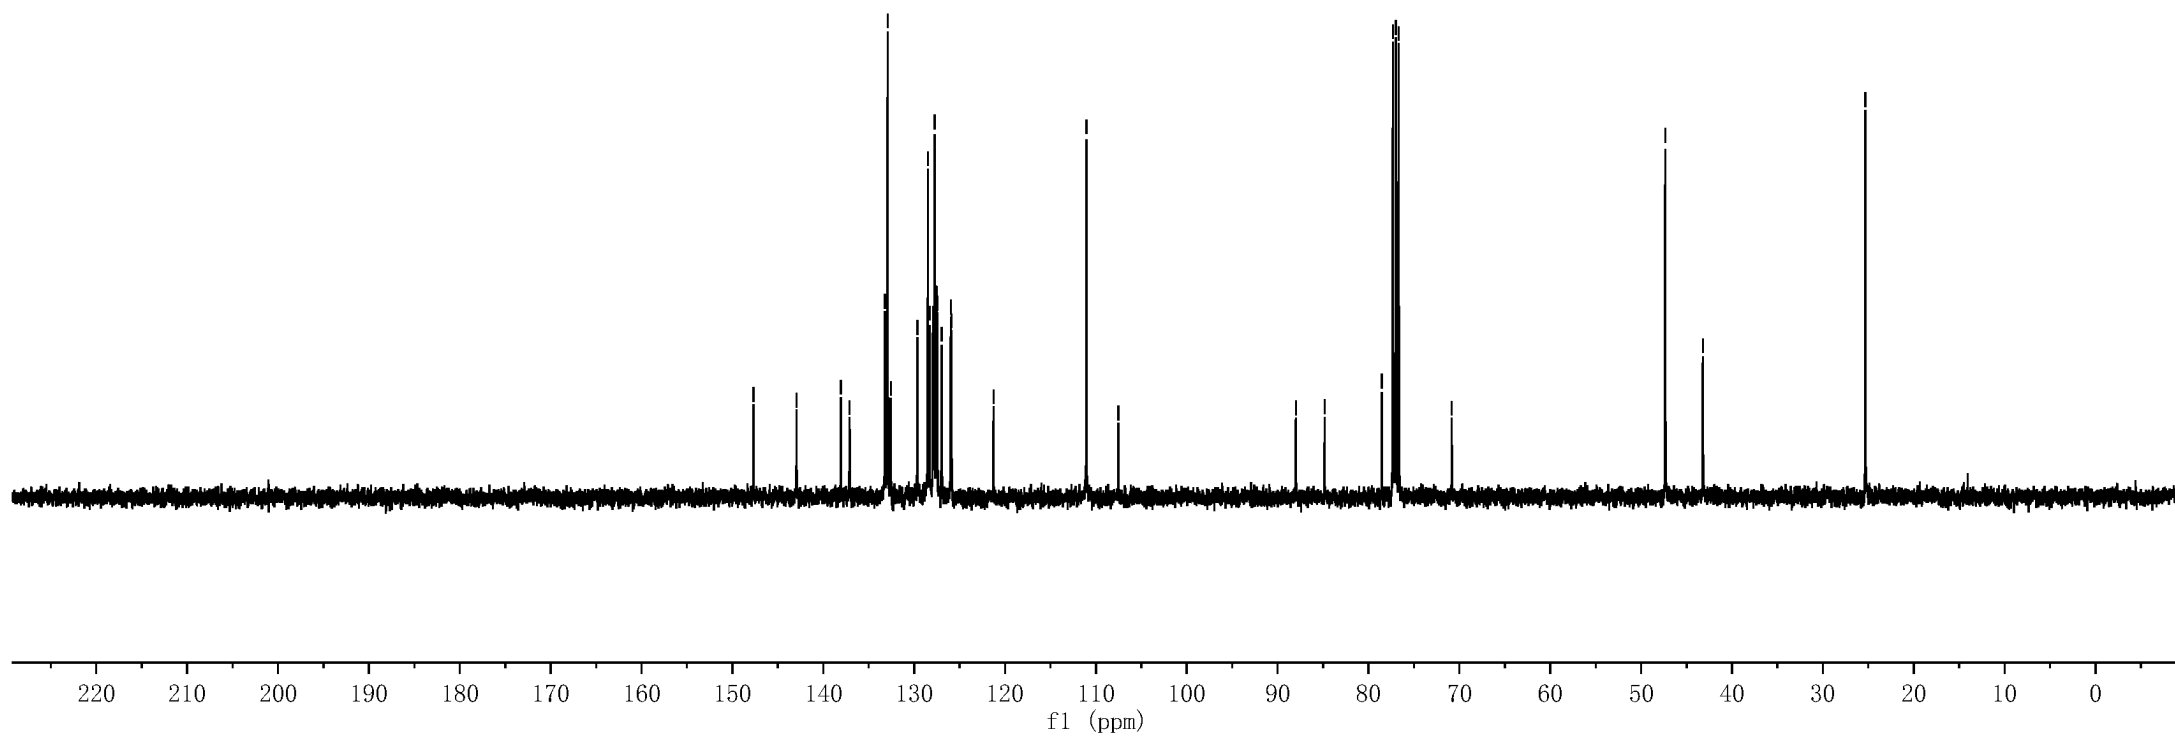

| Parameter                | Value               |
|--------------------------|---------------------|
| 1 Title                  | zyx-3-145-h         |
| 2 Origin                 | Bruker BioSpin GmbH |
| 3 Solvent                | CDCl3               |
| 4 Temperature            | 298.0               |
| 5 Number of Scans        | 7                   |
| 6 Acquisition Time       | 4.0894              |
| 7 Acquisition Date       | 2021-12-02T16:16:13 |
| 8 Spectrometer Frequency | 400.13              |
| 9 Spectral Width         | 8012.8              |

8.027  
7.893  
7.877  
7.870  
7.815  
7.800  
7.779  
7.744  
7.740  
7.722  
7.719  
7.550  
7.531  
7.467  
7.458  
7.449  
7.430  
7.370  
7.349  
7.328  
7.293  
7.274  
7.255  
7.099  
7.077  
6.950  
6.928  
6.374  
6.352

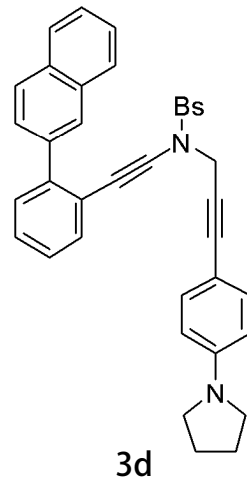

4.419

3.241  
3.225  
3.209

1.963  
1.947  
1.931

0.000

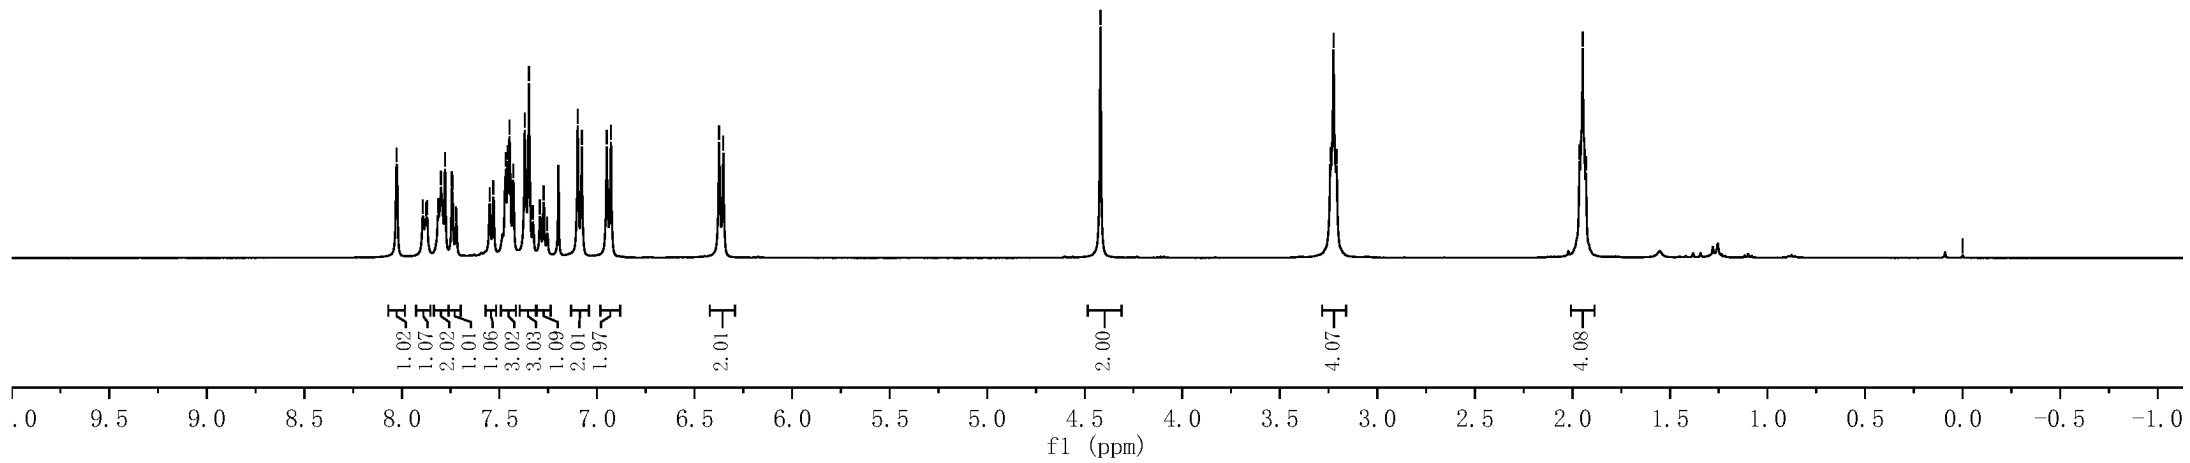



| Parameter                | Value               |
|--------------------------|---------------------|
| 1 Title                  | zyx-3-145-c         |
| 2 Origin                 | Bruker BioSpin GmbH |
| 3 Solvent                | CDCl3               |
| 4 Temperature            | 300.0               |
| 5 Number of Scans        | 32                  |
| 6 Acquisition Time       | 1.3631              |
| 7 Acquisition Date       | 2021-12-02T16:17:28 |
| 8 Spectrometer Frequency | 100.61              |
| 9 Spectral Width         | 24038.5             |

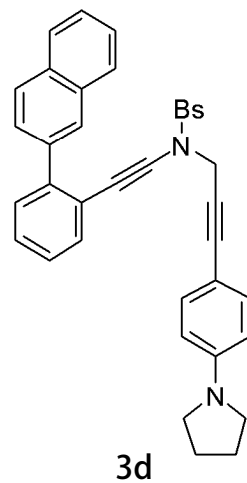

147.73  
143.07  
132.90  
132.87  
131.78  
129.17  
128.29  
127.57  
127.52  
126.09

111.17  
107.22

88.32  
84.46  
78.31  
77.32  
77.00  
76.68  
70.86

47.36  
43.37

25.33

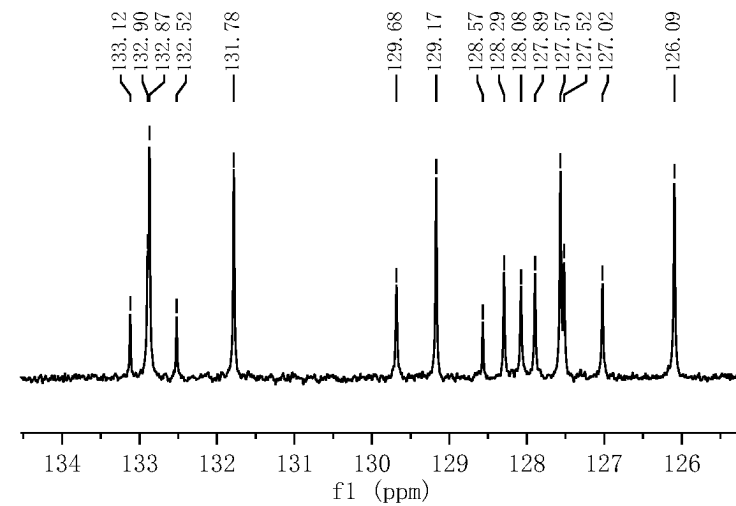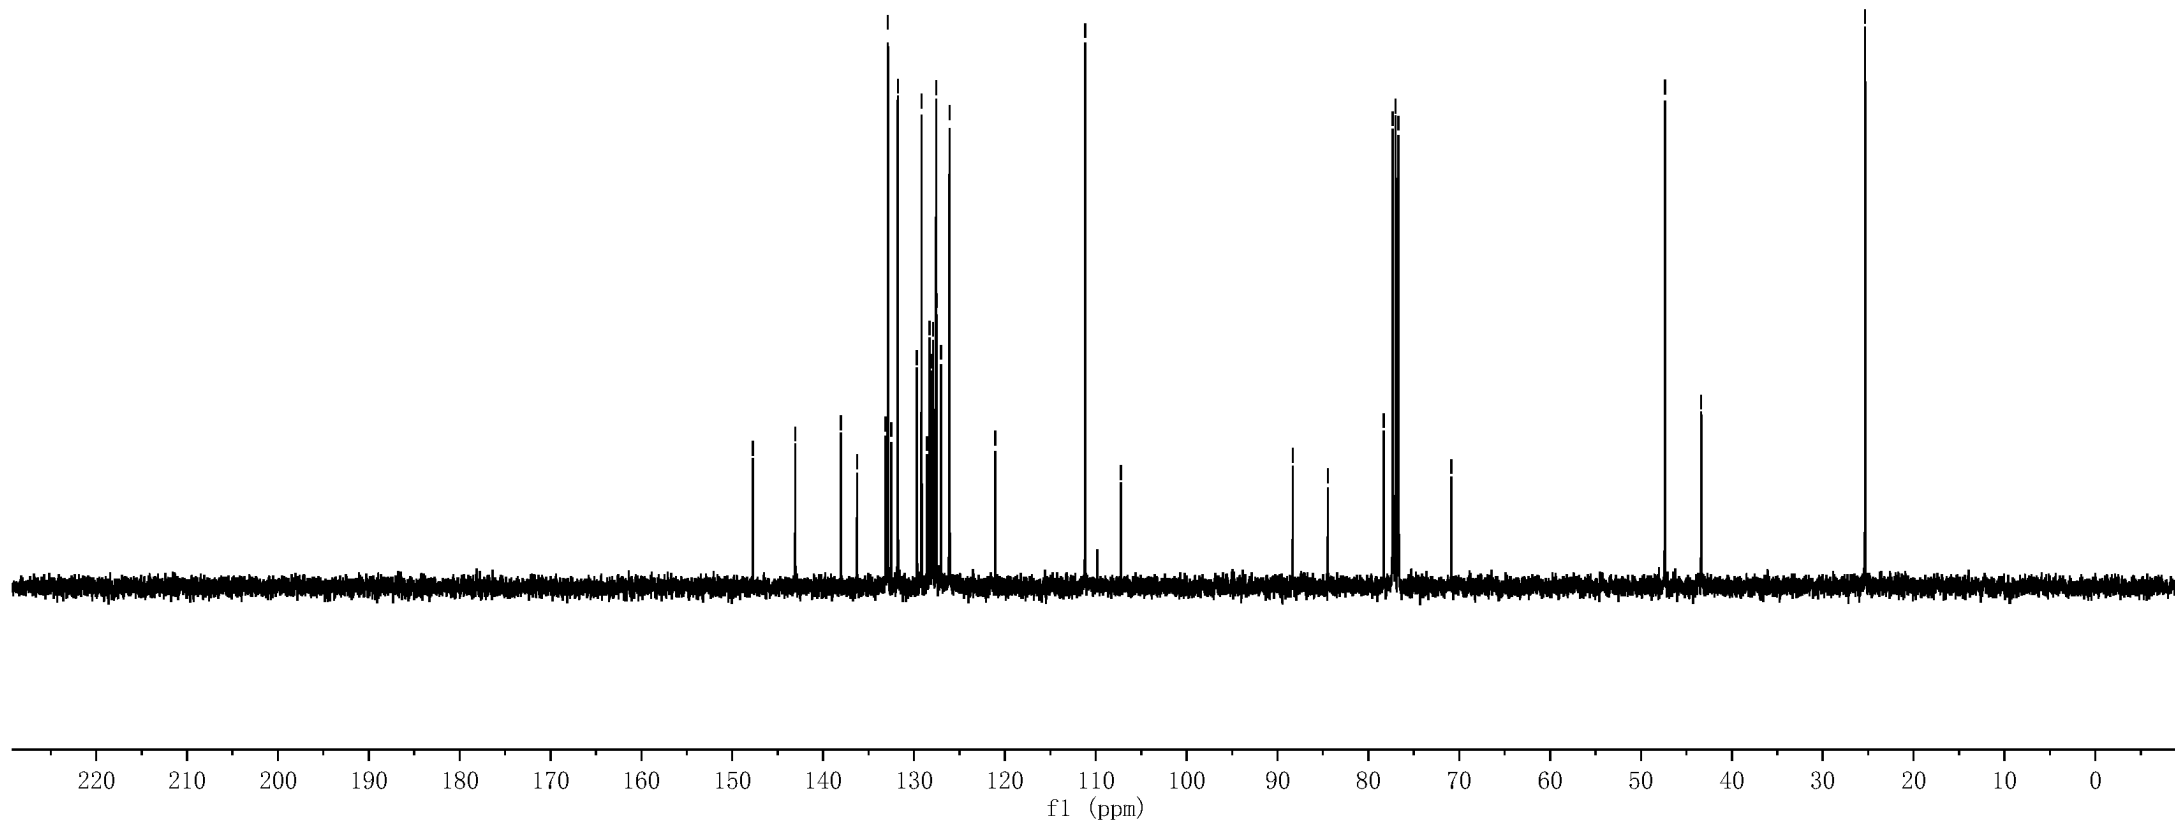

| Parameter                | Value               |
|--------------------------|---------------------|
| 1 Title                  | zyx-3-146-h         |
| 2 Origin                 | Bruker BioSpin GmbH |
| 3 Solvent                | CDCl <sub>3</sub>   |
| 4 Temperature            | 298.0               |
| 5 Number of Scans        | 7                   |
| 6 Acquisition Time       | 4.0894              |
| 7 Acquisition Date       | 2021-12-02T16:29:42 |
| 8 Spectrometer Frequency | 400.13              |
| 9 Spectral Width         | 8012.8              |

8.040  
7.917  
7.908  
7.902  
7.893  
7.843  
7.822  
7.810  
7.794  
7.772  
7.514  
7.492  
7.458  
7.451  
7.435  
7.405  
6.983

6.494  
6.472  
6.352  
6.330

4.386

3.614

3.237  
3.221  
3.205

1.973  
1.957  
1.941

0.000

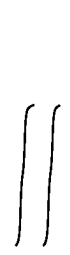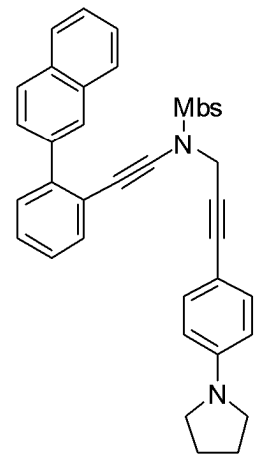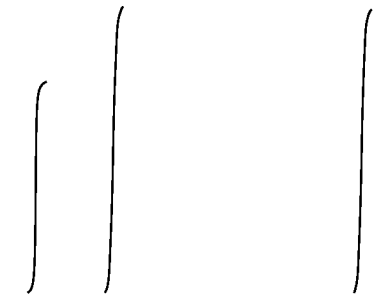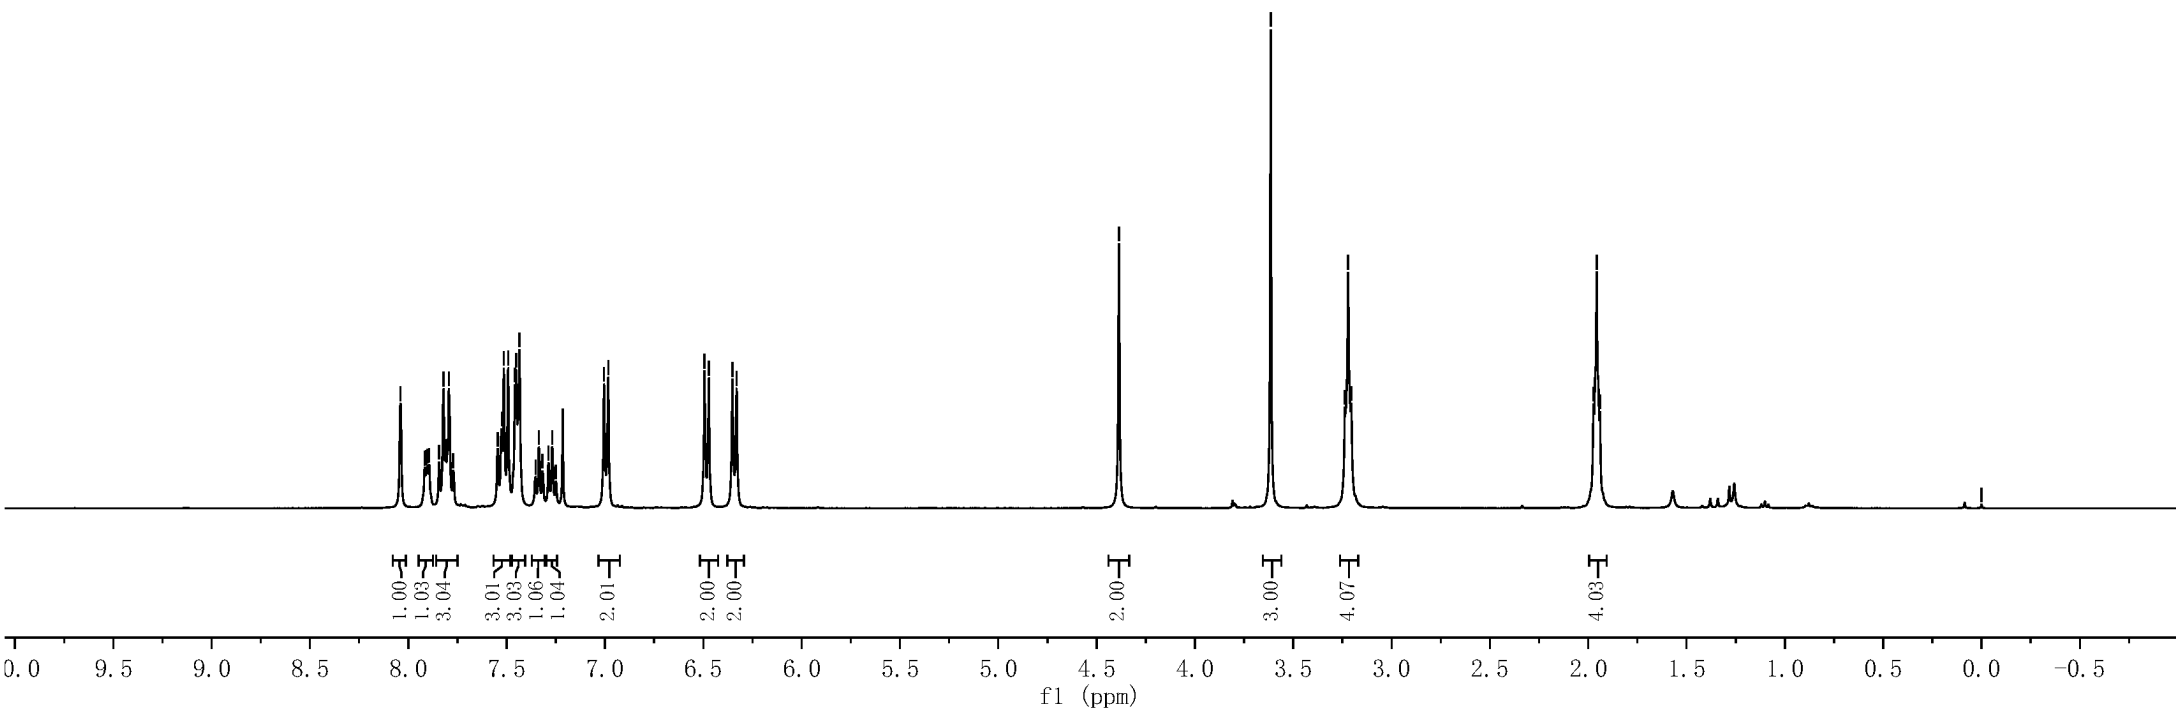

| Parameter                | Value               |
|--------------------------|---------------------|
| 1 Title                  | zyx-3-146-c         |
| 2 Origin                 | Bruker BioSpin GmbH |
| 3 Solvent                | CDCl3               |
| 4 Temperature            | 300.0               |
| 5 Number of Scans        | 44                  |
| 6 Acquisition Time       | 1.3631              |
| 7 Acquisition Date       | 2021-12-02T16:31:00 |
| 8 Spectrometer Frequency | 100.61              |
| 9 Spectral Width         | 24038.5             |

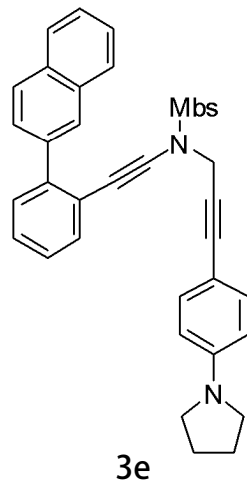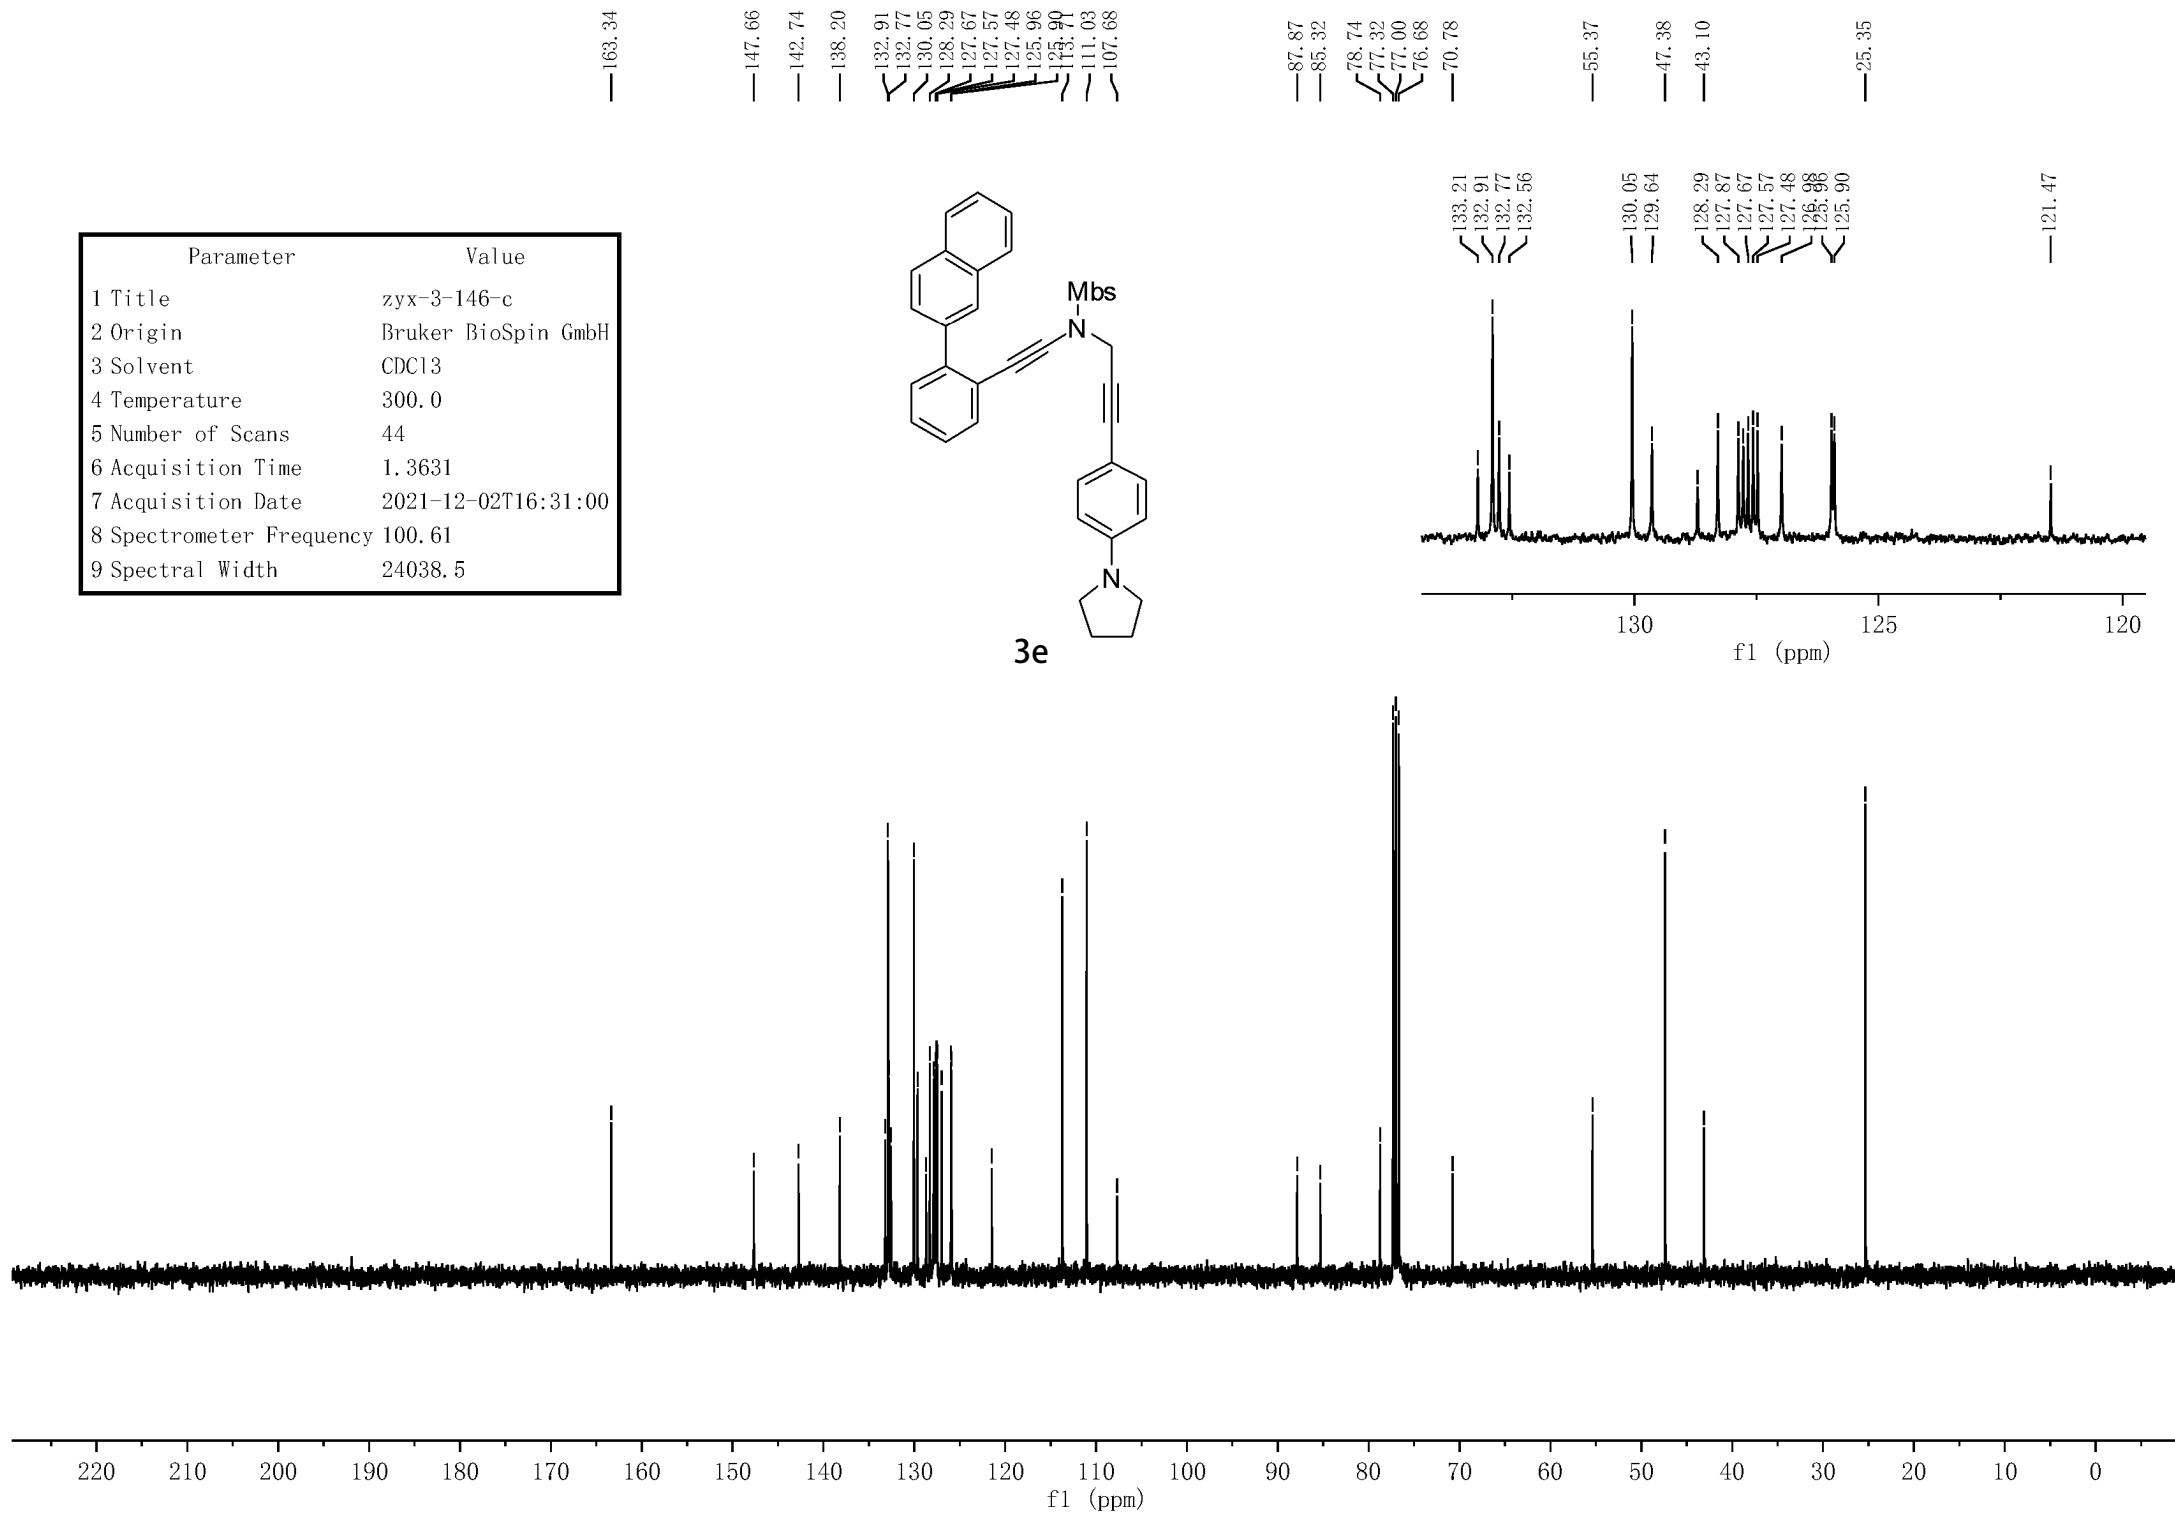

| Parameter                | Value               |
|--------------------------|---------------------|
| 1 Title                  | zyx-3-202--f        |
| 2 Origin                 | Bruker BioSpin GmbH |
| 3 Solvent                | CDCl <sub>3</sub>   |
| 4 Temperature            | 298.0               |
| 5 Number of Scans        | 8                   |
| 6 Acquisition Time       | 4.0894              |
| 7 Acquisition Date       | 2021-12-23T16:45:04 |
| 8 Spectrometer Frequency | 400.13              |
| 9 Spectral Width         | 8012.8              |

8.053  
7.900  
7.887  
7.878  
7.822  
7.791  
7.747  
7.726  
7.571  
7.557  
7.550  
7.536  
7.459  
7.454  
7.448  
7.436  
7.206  
7.169  
7.148  
7.031  
7.011  
6.990  
6.395  
6.373

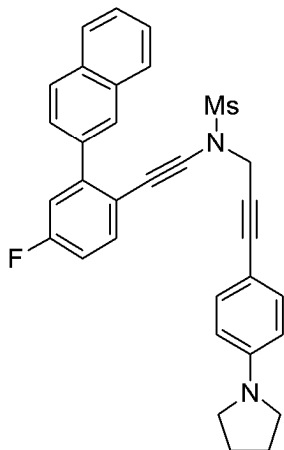

4.406  
3.252  
3.236  
3.220  
2.771  
1.980  
1.964  
1.948  
0.000

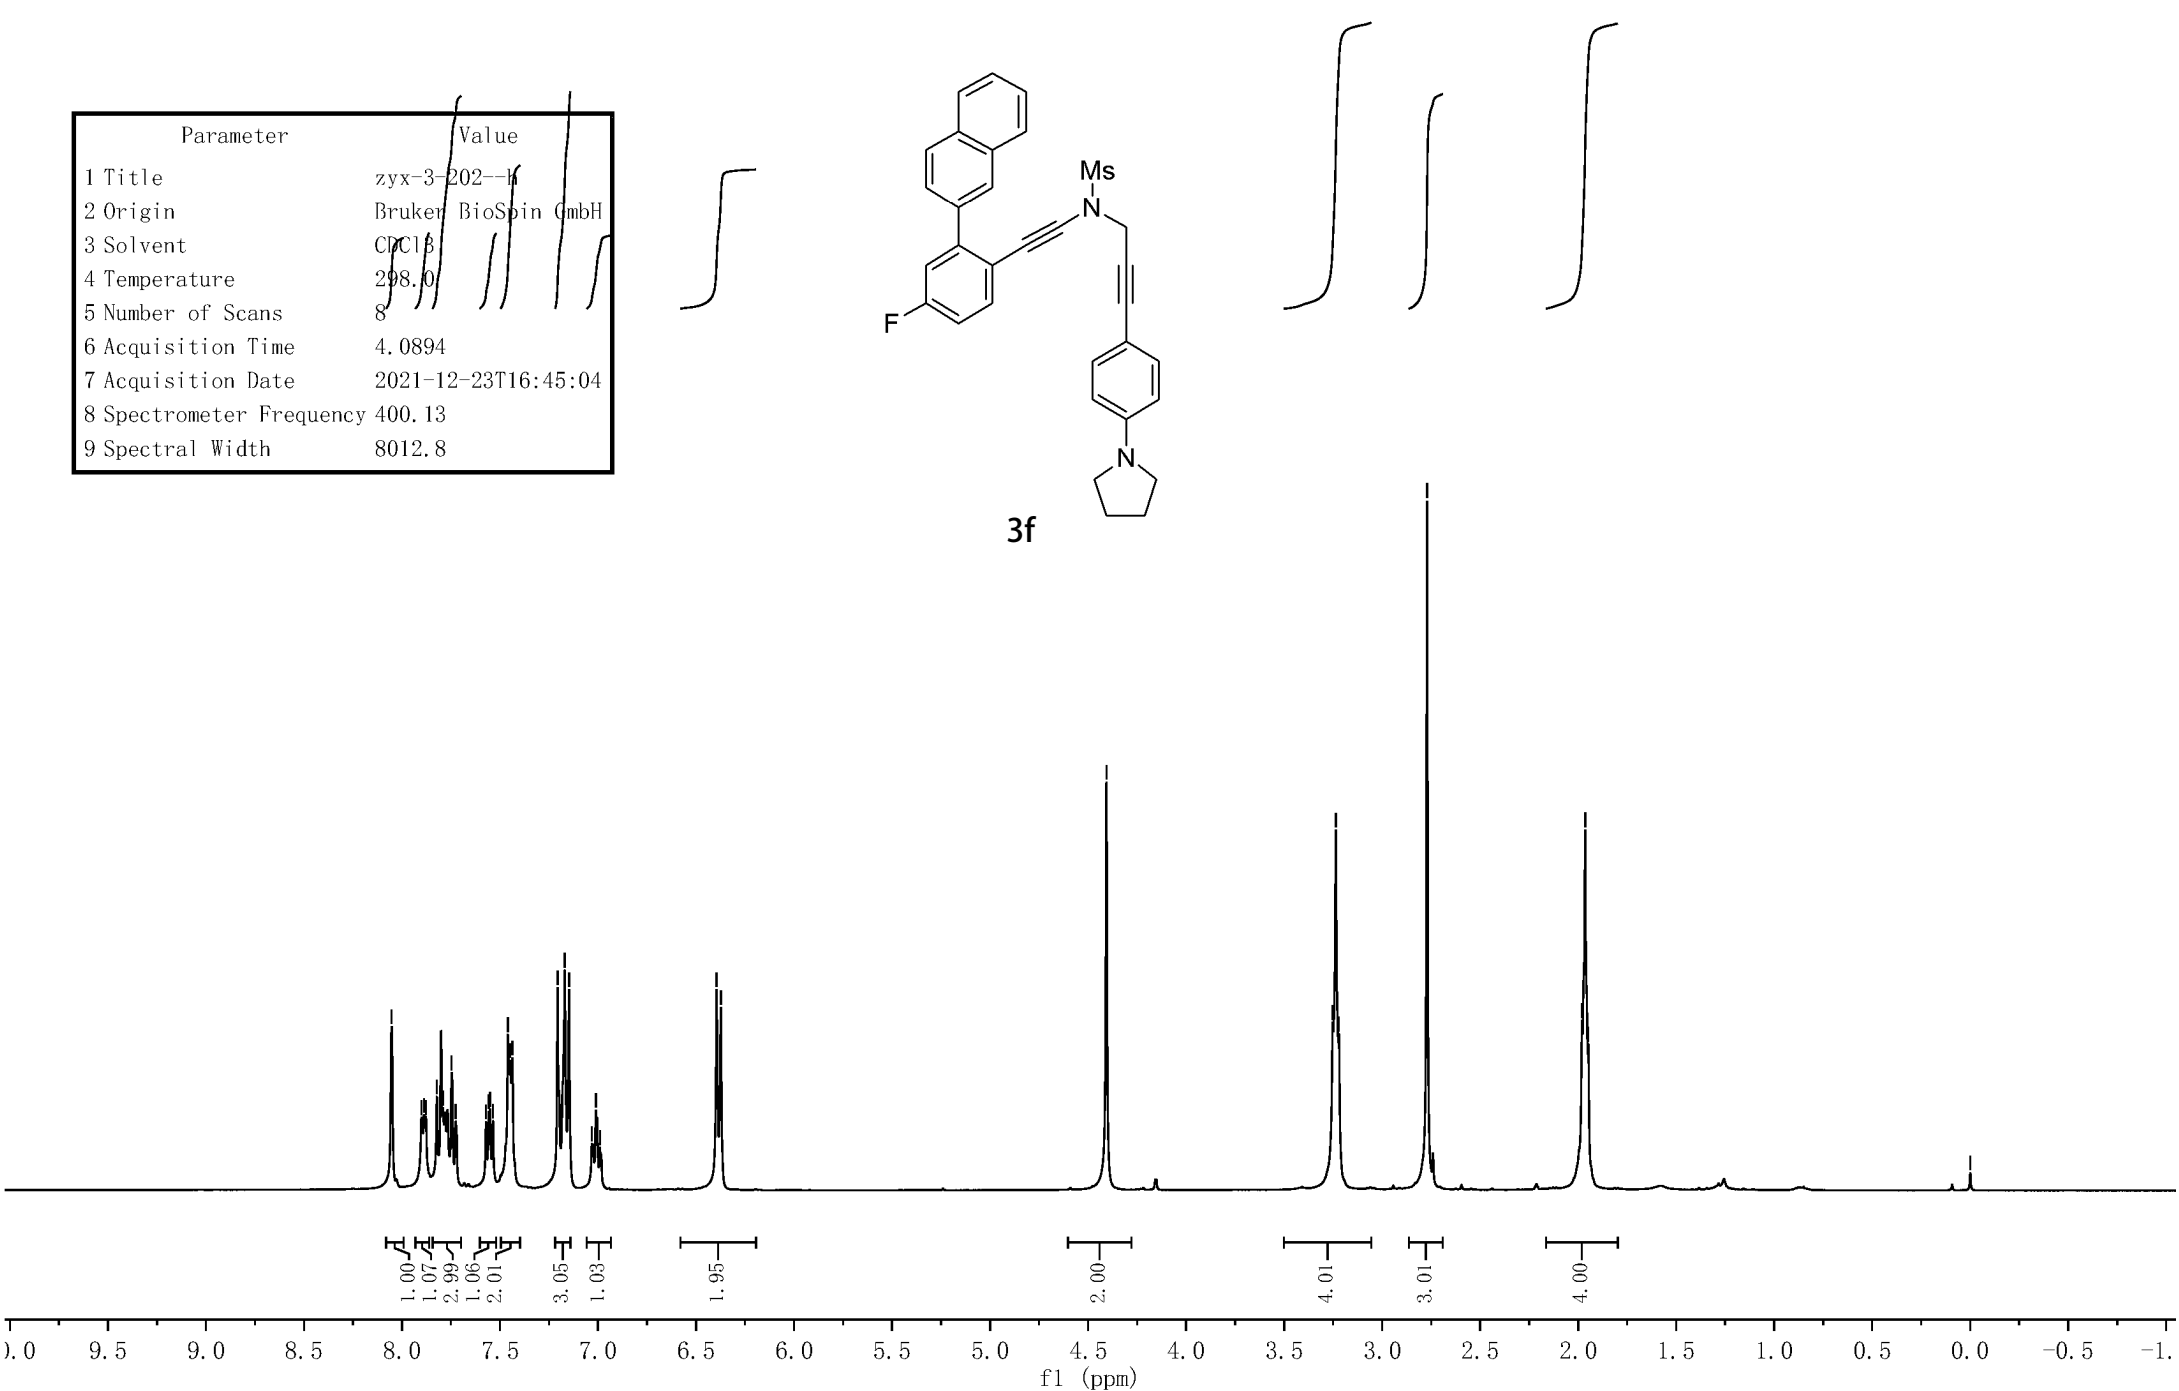

| Parameter                | Value               |
|--------------------------|---------------------|
| 1 Title                  | zyx-3-202--c        |
| 2 Origin                 | Bruker BioSpin GmbH |
| 3 Solvent                | CDCl3               |
| 4 Temperature            | 300.0               |
| 5 Number of Scans        | 82                  |
| 6 Acquisition Time       | 1.3631              |
| 7 Acquisition Date       | 2021-12-23T16:46:17 |
| 8 Spectrometer Frequency | 100.61              |
| 9 Spectral Width         | 24038.5             |

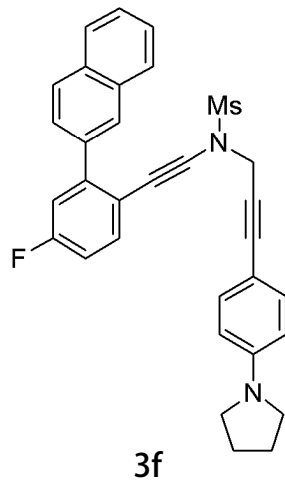

163.44  
160.96

147.92  
145.82  
145.74  
133.01  
132.99  
128.36  
128.09  
127.63  
127.50  
127.07  
126.27  
125.08  
117.05  
116.66  
116.43  
114.41  
114.19  
111.25  
107.03

88.52  
84.03  
78.94  
77.32  
77.00  
76.68  
69.95

47.37  
43.19  
38.36  
25.33

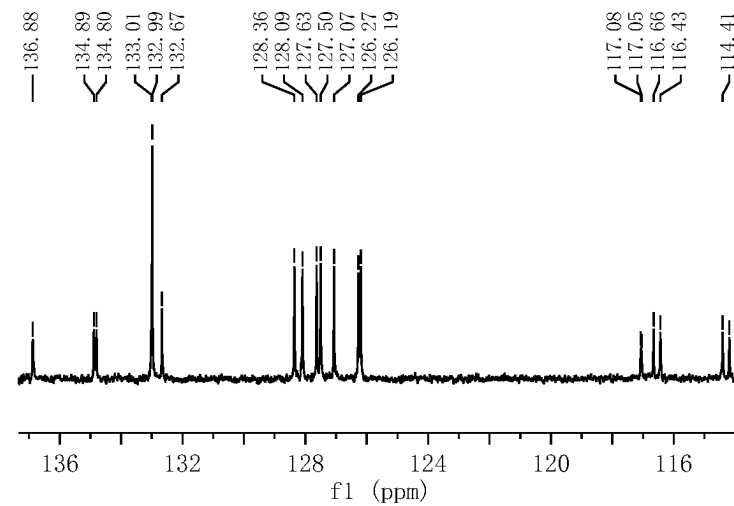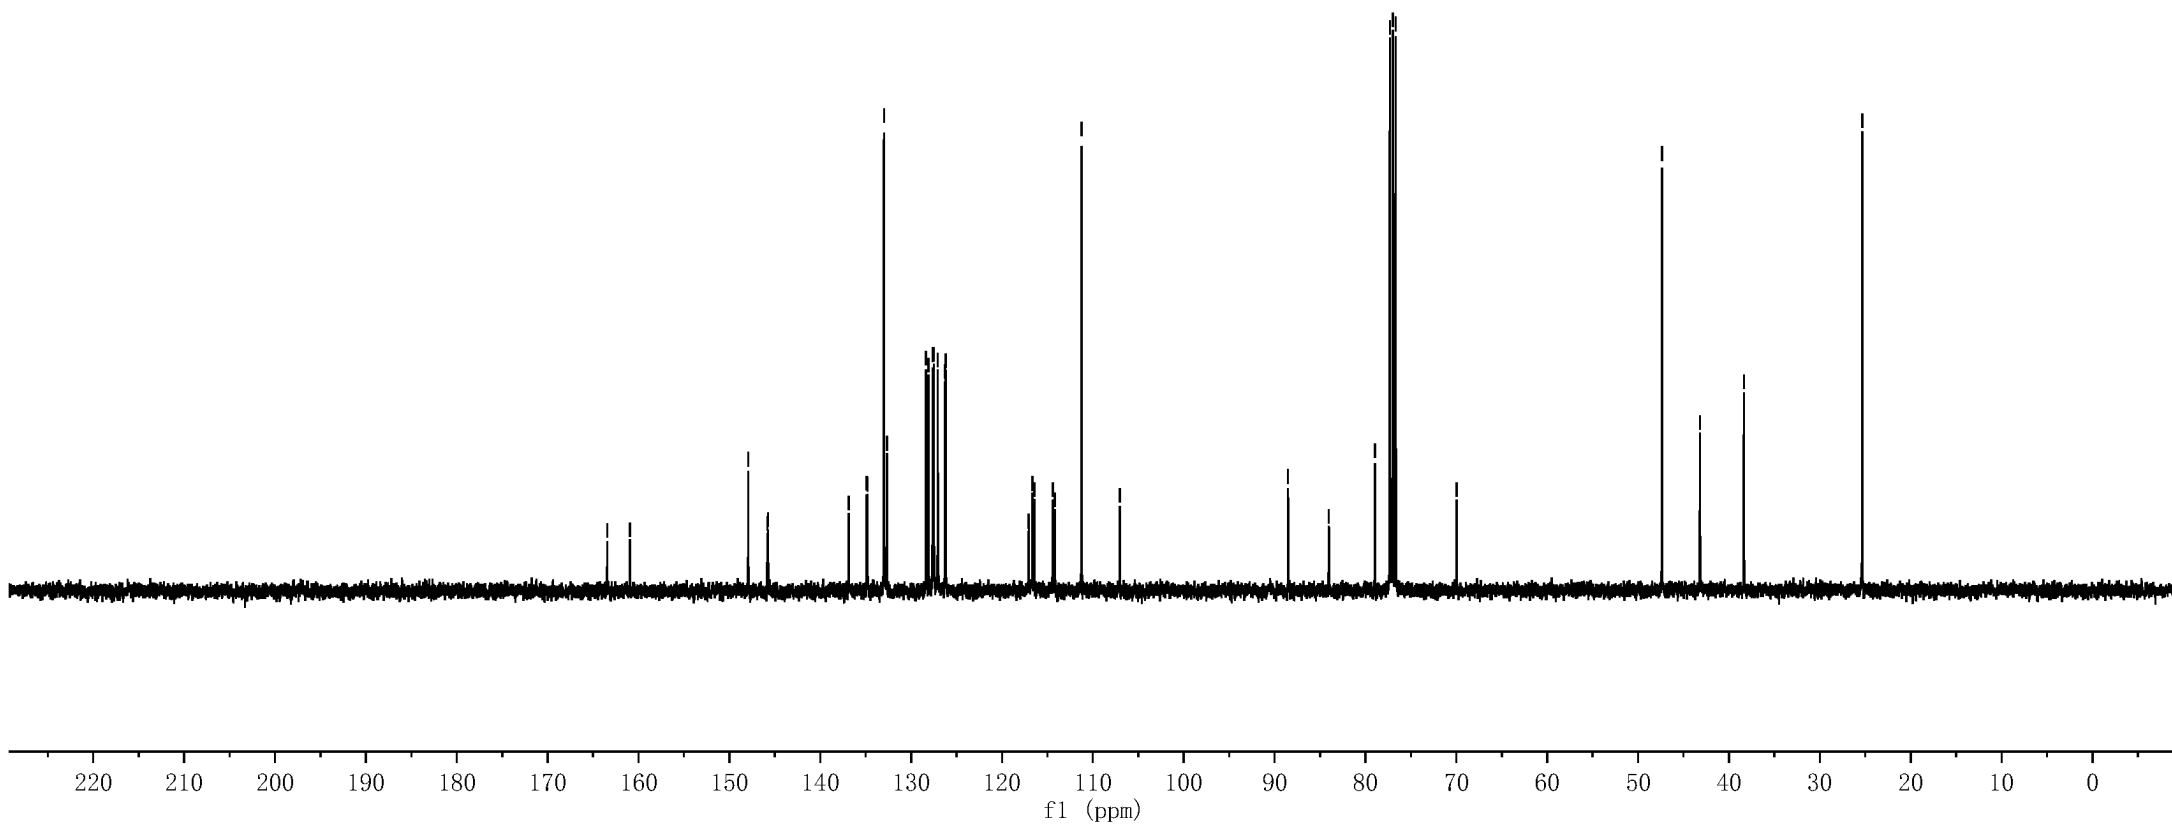

| Parameter                | Value               |
|--------------------------|---------------------|
| 1 Title                  | ZYX-3-202-F         |
| 2 Origin                 | Bruker BioSpin GmbH |
| 3 Solvent                | CDCl3               |
| 4 Temperature            | 295.6               |
| 5 Number of Scans        | 16                  |
| 6 Acquisition Time       | 0.7340              |
| 7 Acquisition Date       | 2022-01-19T16:39:59 |
| 8 Spectrometer Frequency | 376.31              |
| 9 Spectral Width         | 89285.7             |

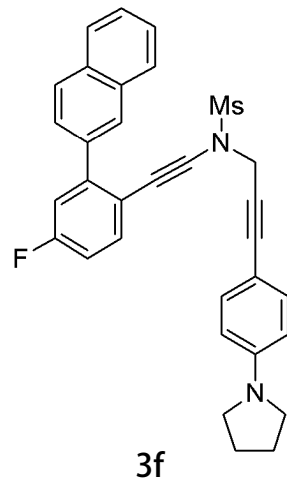

111.89

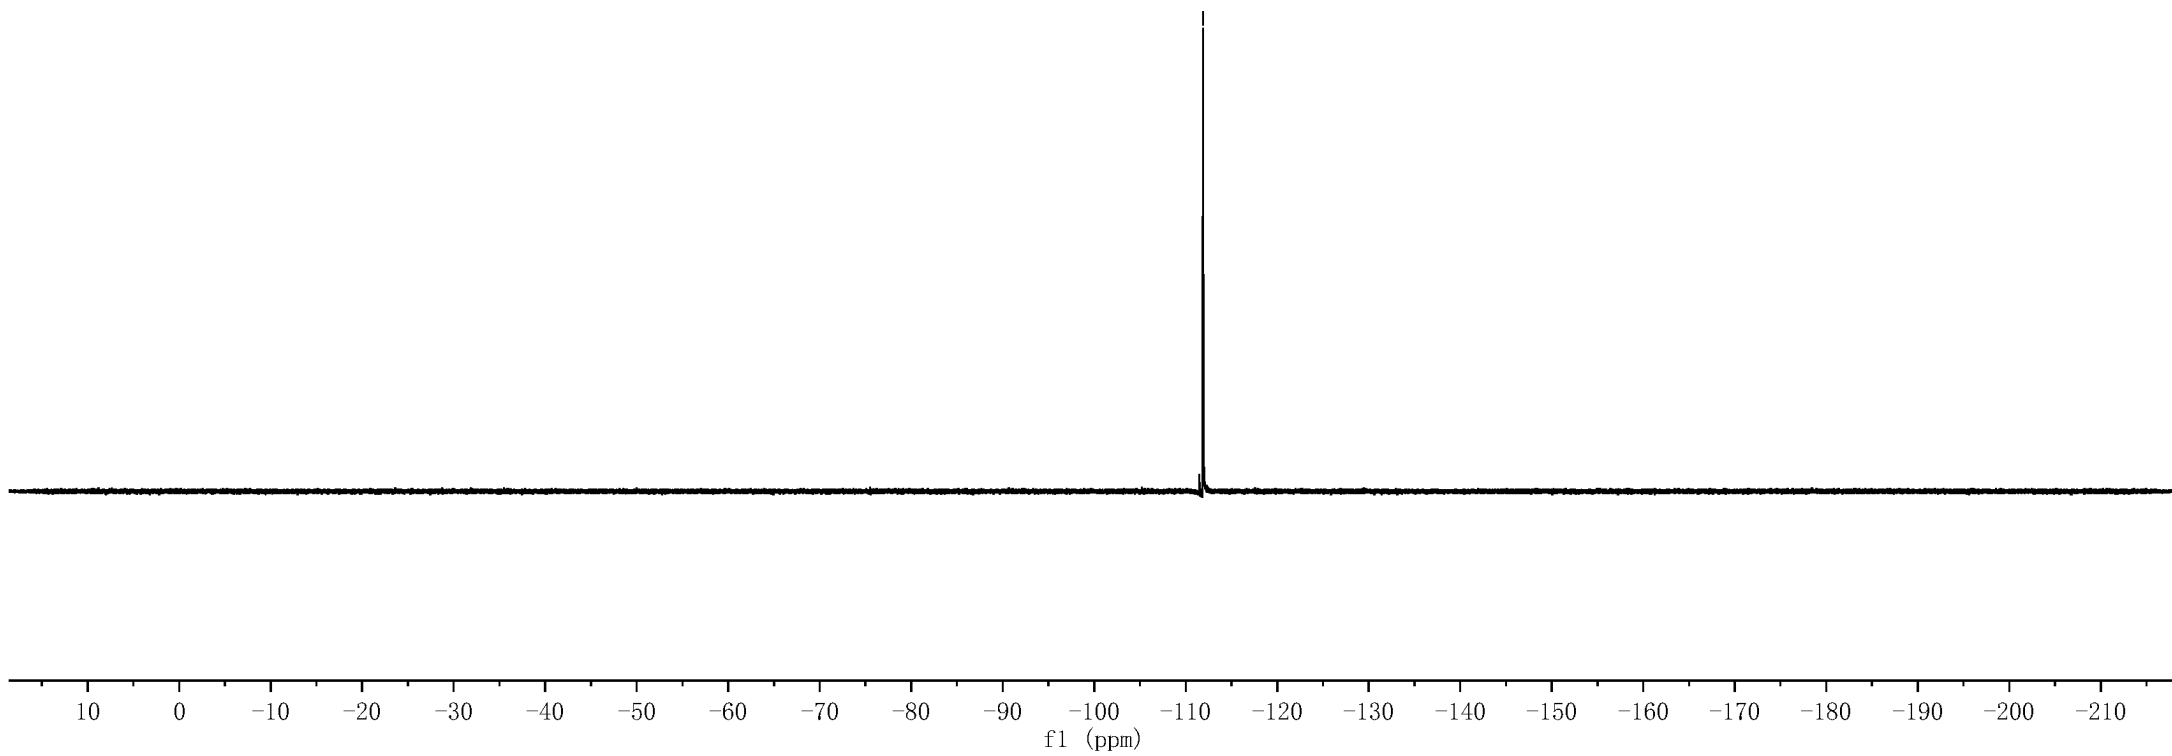

| Parameter                | Value               |
|--------------------------|---------------------|
| 1 Title                  | zyx-3-203-h         |
| 2 Origin                 | Bruker BioSpin GmbH |
| 3 Solvent                | CDCl <sub>3</sub>   |
| 4 Temperature            | 298.0               |
| 5 Number of Scans        | 8                   |
| 6 Acquisition Time       | 4.0894              |
| 7 Acquisition Date       | 2021-12-23T16:53:54 |
| 8 Spectrometer Frequency | 400.13              |
| 9 Spectral Width         | 8012.8              |

8.036  
7.900  
7.886  
7.877  
7.828  
7.806  
7.794  
7.771  
7.733  
7.712  
7.501  
7.480  
7.465  
7.446  
7.279  
7.274  
7.258  
7.253  
7.166  
7.145  
6.390  
6.368

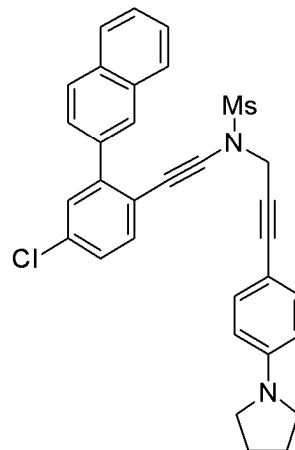

4.399  
3.244  
3.229  
3.214  
2.772  
1.973  
1.957  
1.942  
0.000

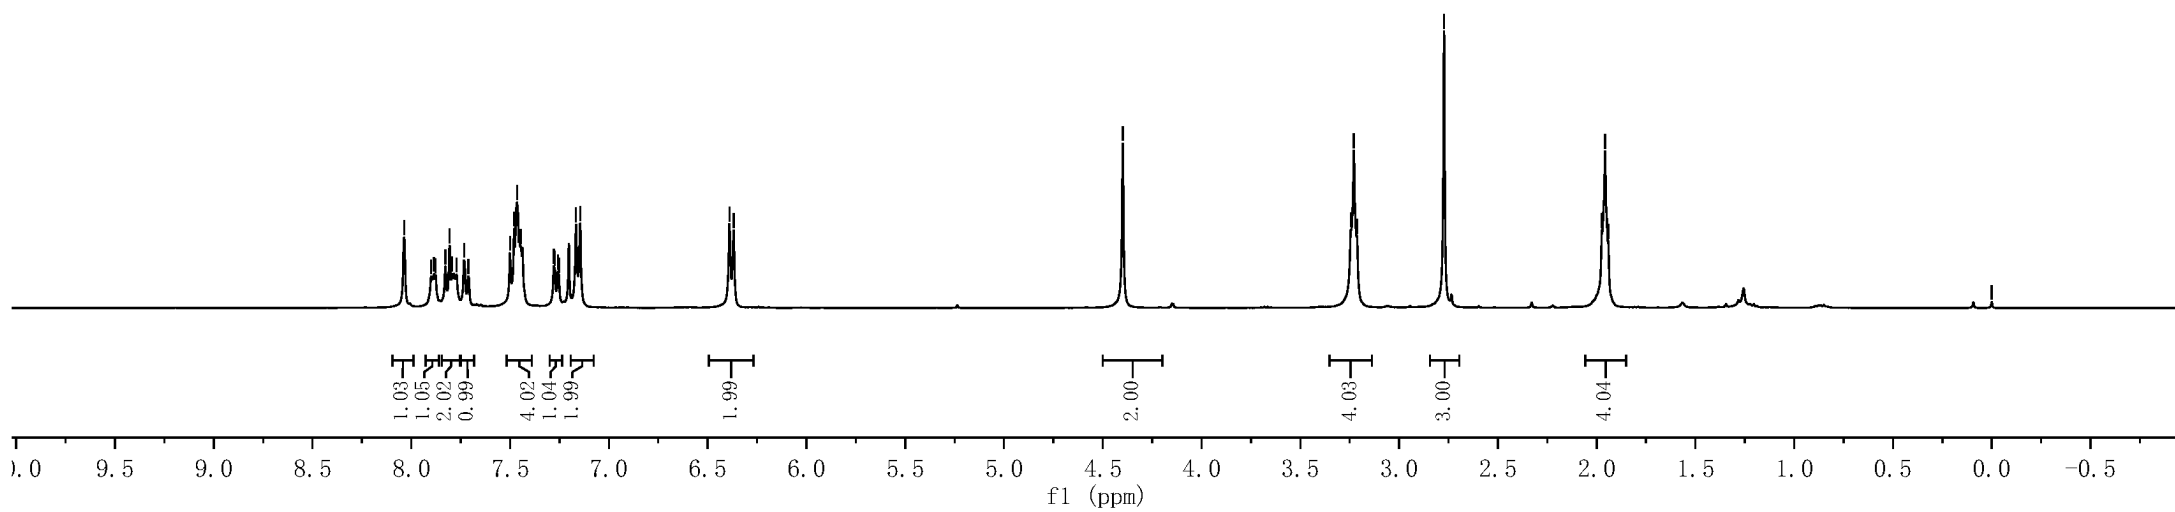

| Parameter                | Value               |
|--------------------------|---------------------|
| 1 Title                  | zyx-3--203-c        |
| 2 Origin                 | Bruker BioSpin GmbH |
| 3 Solvent                | CDCl3               |
| 4 Temperature            | 300.0               |
| 5 Number of Scans        | 25                  |
| 6 Acquisition Time       | 1.3631              |
| 7 Acquisition Date       | 2021-12-22T17:14:53 |
| 8 Spectrometer Frequency | 100.61              |
| 9 Spectral Width         | 24038.5             |

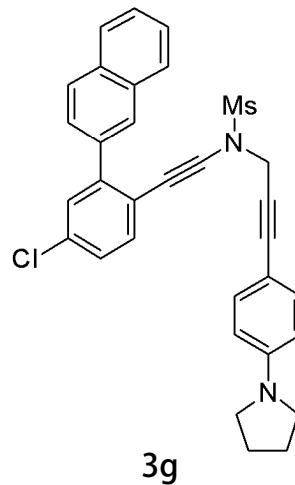

147.86  
144.73  
133.84  
132.93  
128.30  
128.03  
127.60  
127.45  
126.99  
126.24  
119.54  
111.19  
106.88  
88.57  
85.27  
78.82  
77.32  
77.00  
76.68  
70.06

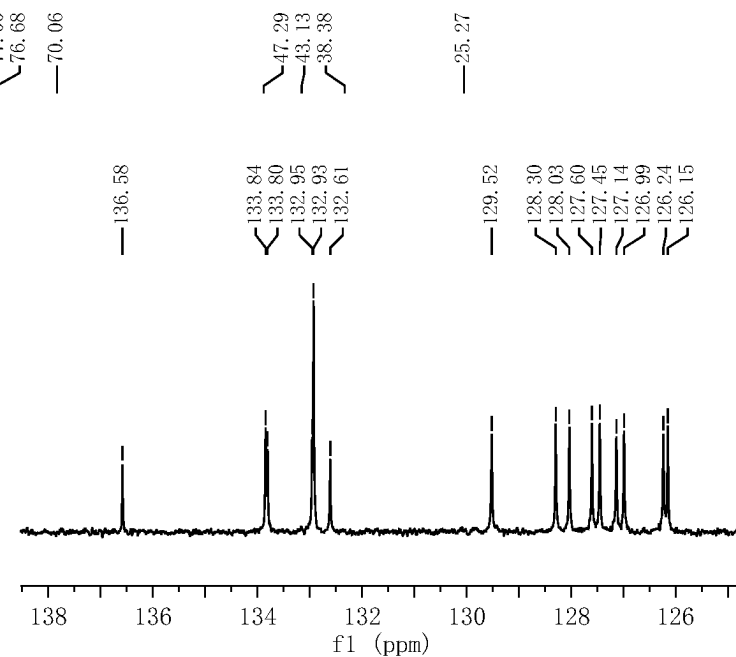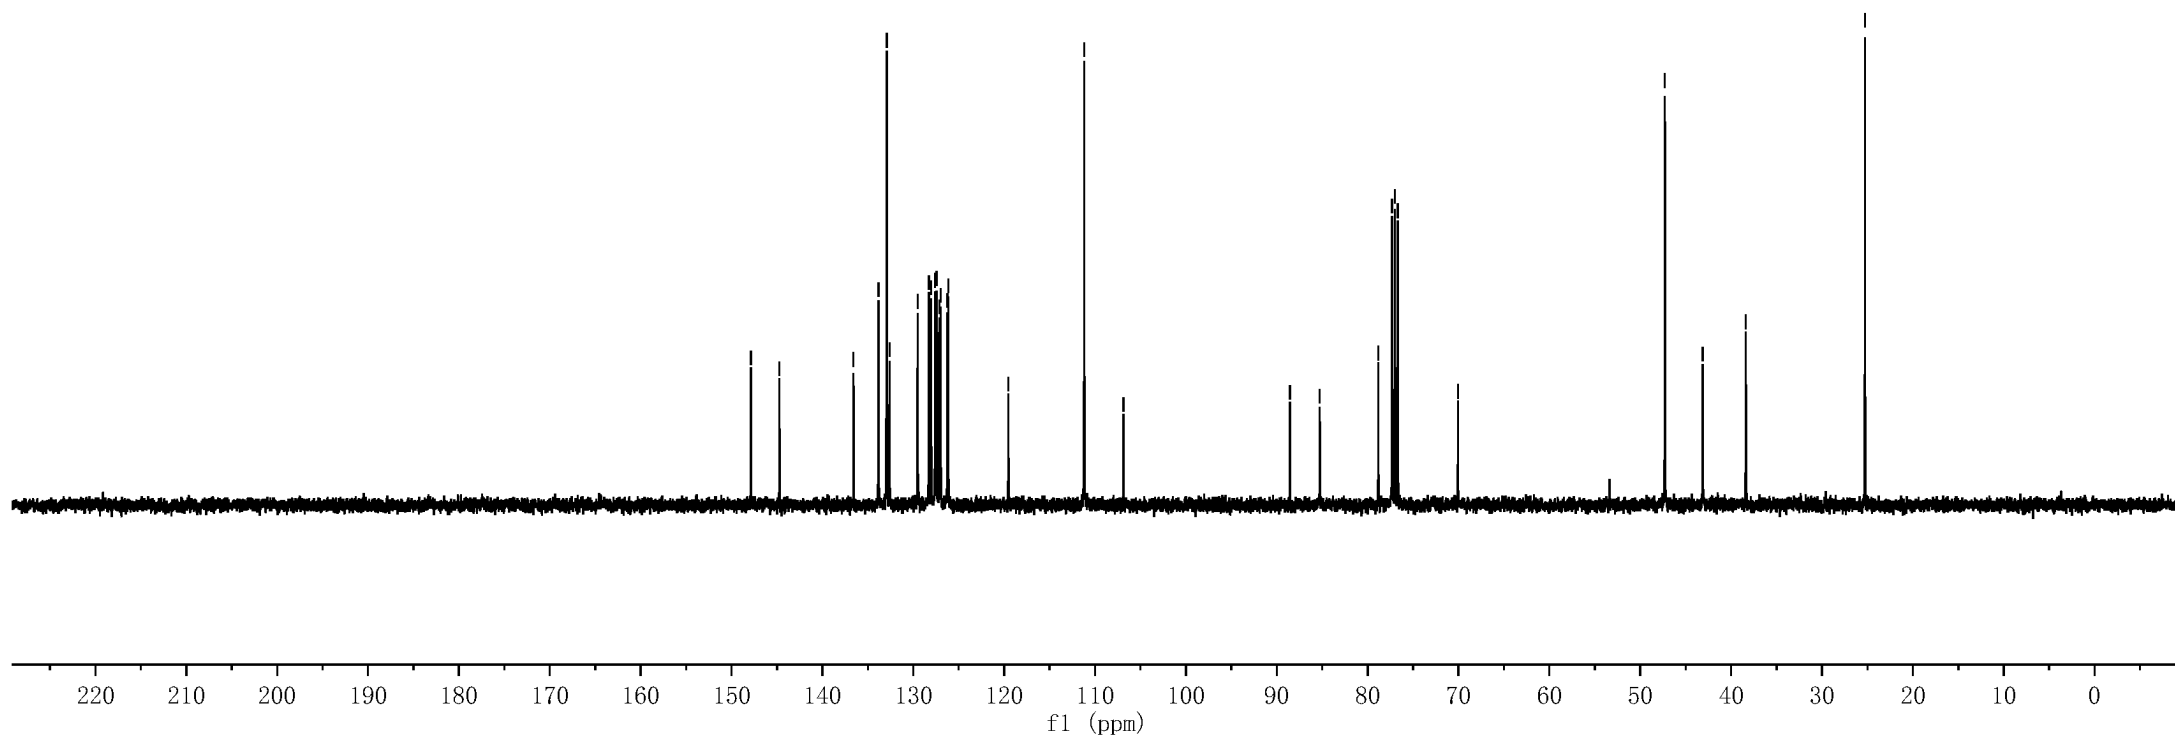



| Parameter                | Value               |
|--------------------------|---------------------|
| 1 Title                  | zyx-3-191-3-1       |
| 2 Origin                 | Bruker BioSpin GmbH |
| 3 Solvent                | CDCl <sub>3</sub>   |
| 4 Temperature            | 298.0               |
| 5 Number of Scans        | 11                  |
| 6 Acquisition Time       | 4.0894              |
| 7 Acquisition Date       | 2021-12-16T16:44:45 |
| 8 Spectrometer Frequency | 400.13              |
| 9 Spectral Width         | 8012.8              |

8.050  
7.898  
7.889  
7.883  
7.875  
7.814  
7.793  
7.777  
7.756  
7.497  
7.477  
7.449  
7.441  
7.434  
7.425  
7.298  
7.228  
7.178  
7.156  
6.405  
6.383

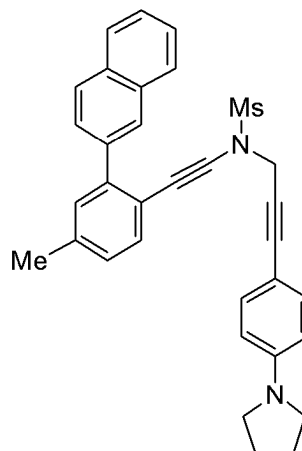

3h

4.410  
3.272  
3.256  
3.240  
2.762  
2.407  
2.000  
1.984  
1.968  
0.000

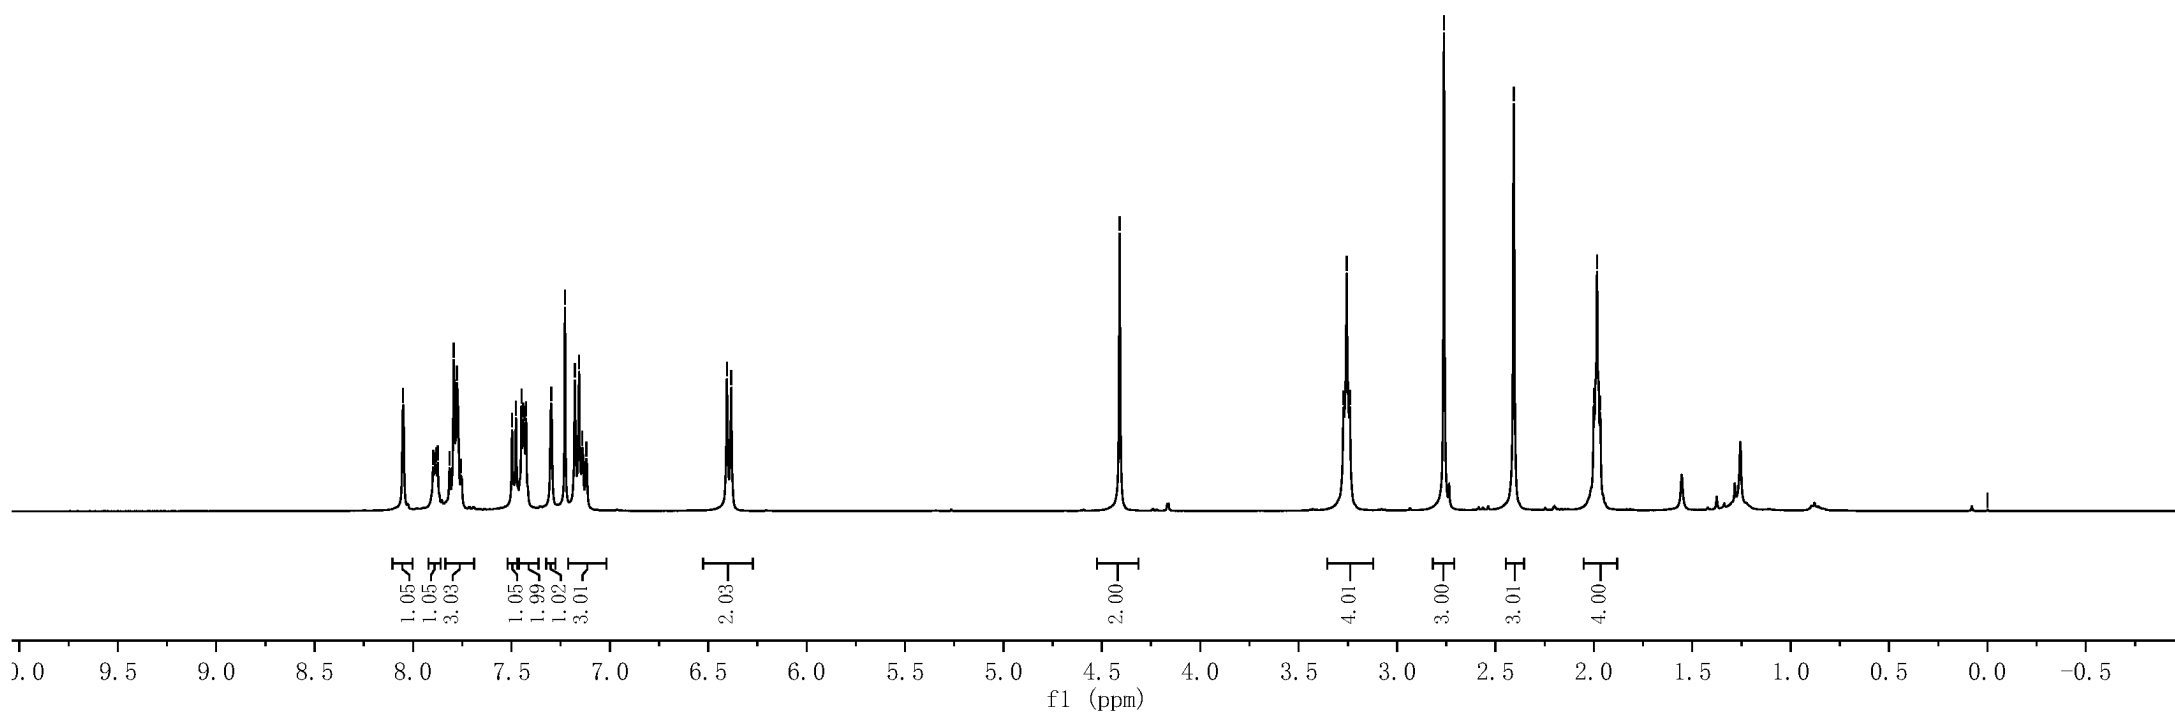

| Parameter                | Value               |
|--------------------------|---------------------|
| 1 Title                  | zyx-3-191-3-cc      |
| 2 Origin                 | Bruker BioSpin GmbH |
| 3 Solvent                | CDC13               |
| 4 Temperature            | 300.0               |
| 5 Number of Scans        | 106                 |
| 6 Acquisition Time       | 1.3631              |
| 7 Acquisition Date       | 2021-12-16T16:46:38 |
| 8 Spectrometer Frequency | 100.61              |
| 9 Spectral Width         | 24038.5             |

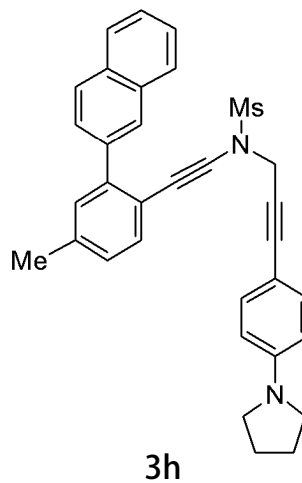

147.94  
143.47  
138.39  
138.20  
133.05  
128.31  
127.98  
127.93  
127.61  
127.51  
127.38  
117.99

111.27  
107.23

88.40  
83.75  
79.10  
77.32  
77.00  
76.68

70.92

47.42  
43.30  
38.27

25.39  
21.44

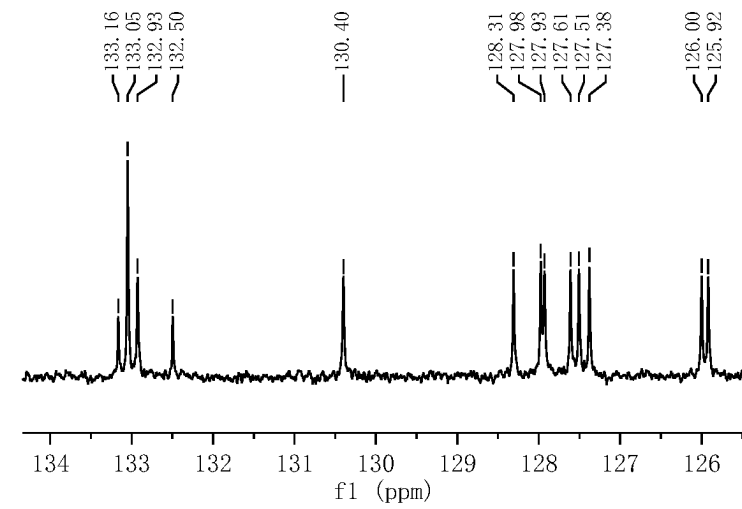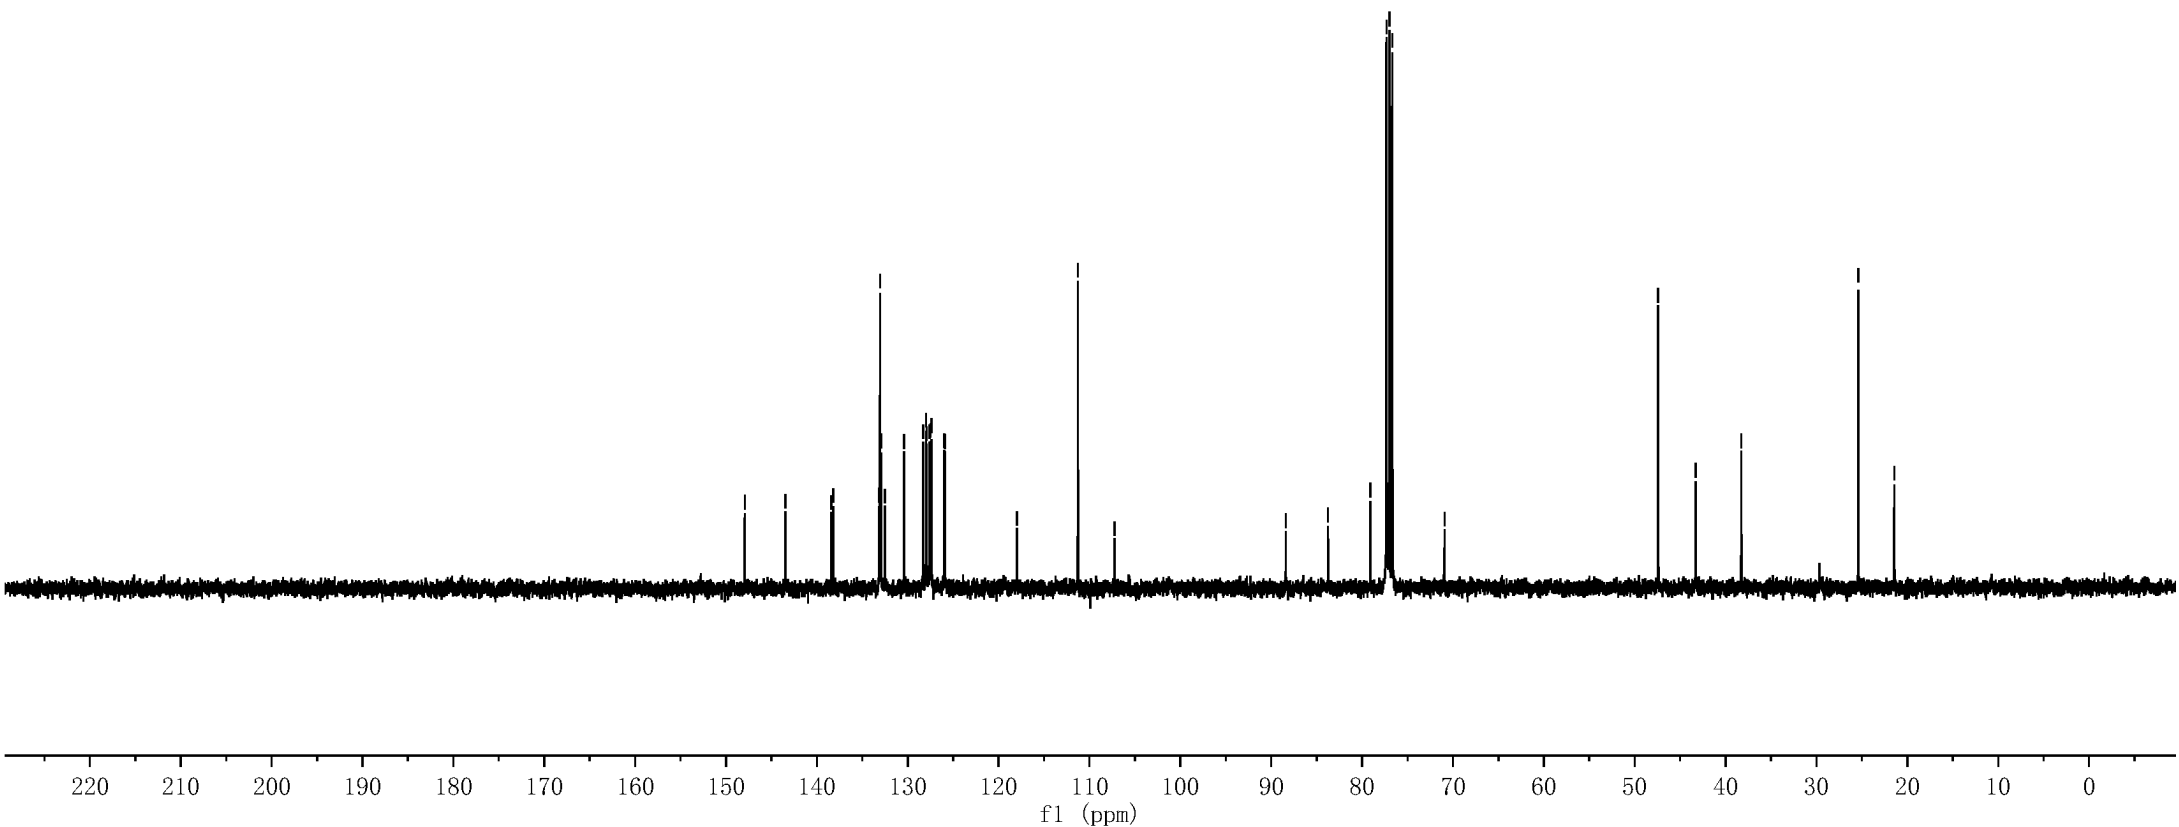

| Parameter                | Value               |
|--------------------------|---------------------|
| 1 Title                  | zyx-4-59-h          |
| 2 Origin                 | Bruker BioSpin GmbH |
| 3 Solvent                | CDCl <sub>3</sub>   |
| 4 Temperature            | 298.0               |
| 5 Number of Scans        | 12                  |
| 6 Acquisition Time       | 4.0894              |
| 7 Acquisition Date       | 2022-02-12T20:32:44 |
| 8 Spectrometer Frequency | 400.13              |
| 9 Spectral Width         | 8012.8              |

8.057  
7.891  
7.877  
7.868  
7.801  
7.779  
7.757  
7.544  
7.522  
7.449  
7.435  
7.425  
7.177  
7.155  
7.016  
7.009  
6.880  
6.873  
6.868  
6.384

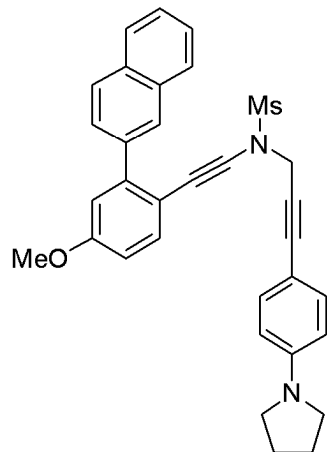

3i

4.412  
3.843  
3.273  
3.256  
3.240  
2.744  
2.000  
1.983  
1.967  
0.000

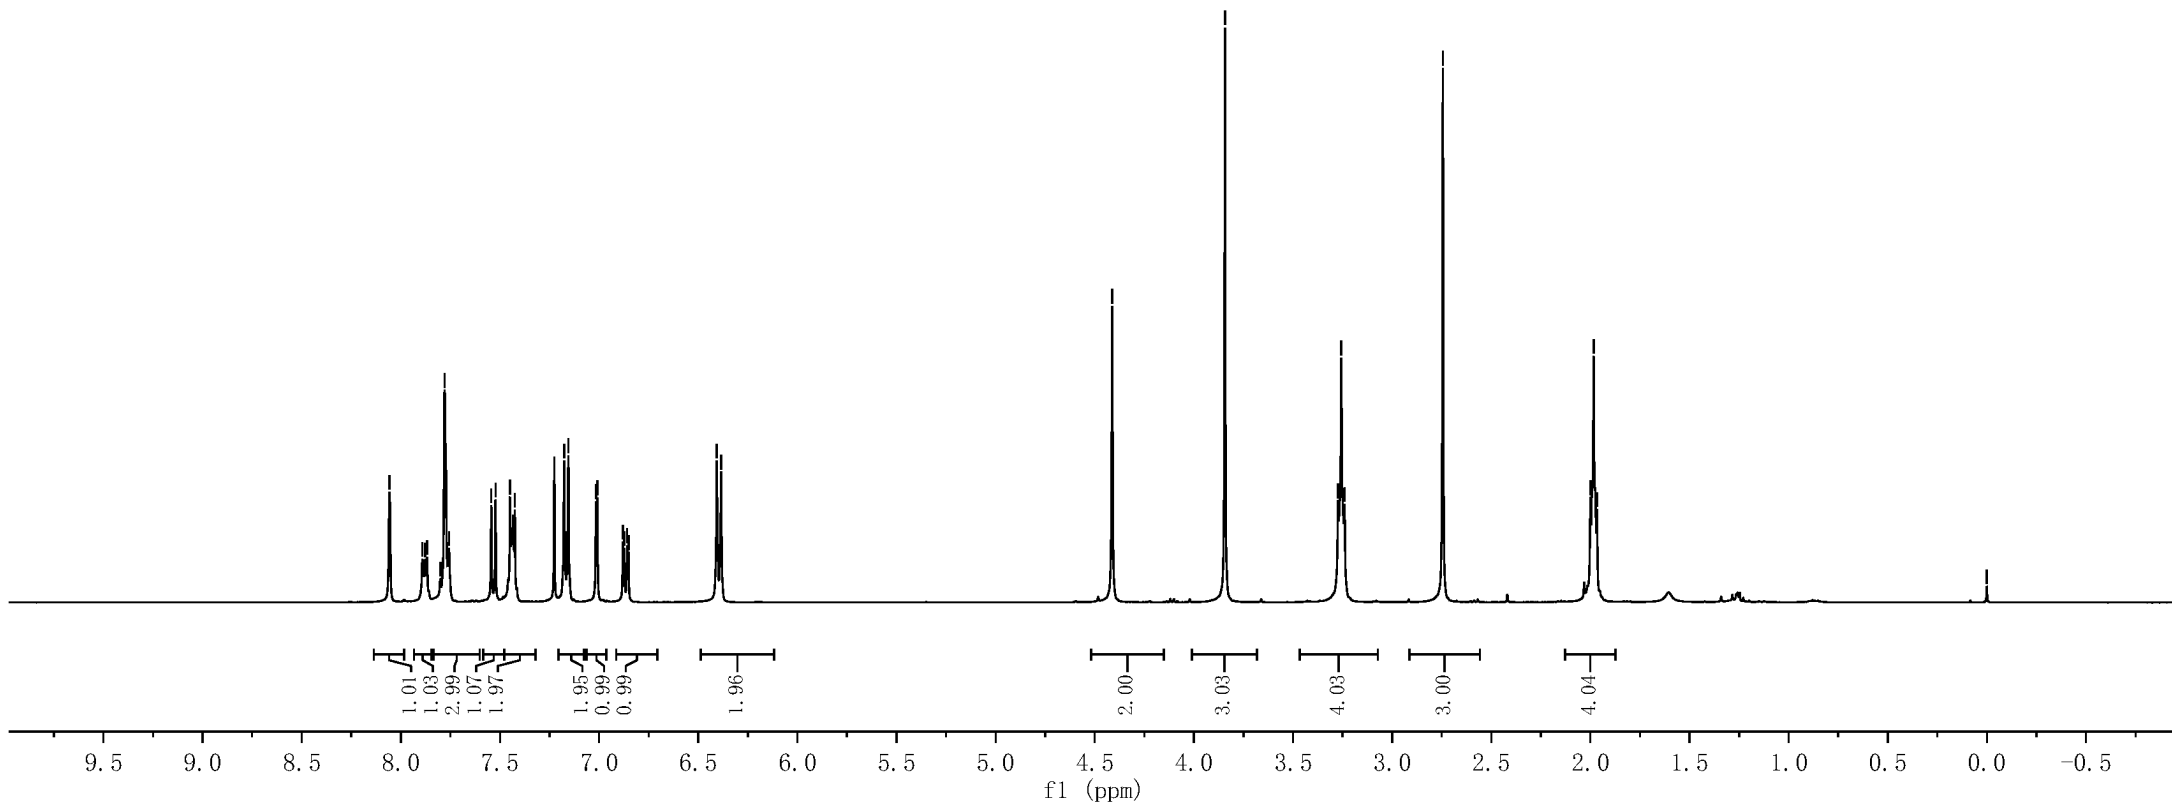

| Parameter                | Value               |
|--------------------------|---------------------|
| 1 Title                  | zyx-4-59-c          |
| 2 Origin                 | Bruker BioSpin GmbH |
| 3 Solvent                | CDCl3               |
| 4 Temperature            | 300.0               |
| 5 Number of Scans        | 54                  |
| 6 Acquisition Time       | 1.3631              |
| 7 Acquisition Date       | 2022-02-12T20:34:41 |
| 8 Spectrometer Frequency | 100.61              |
| 9 Spectral Width         | 24038.5             |

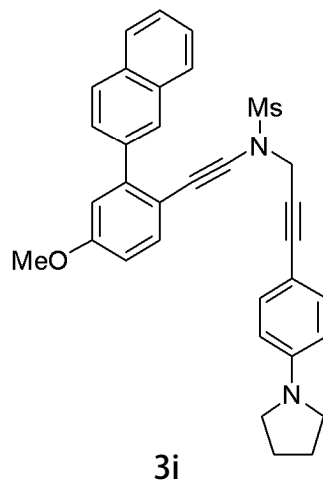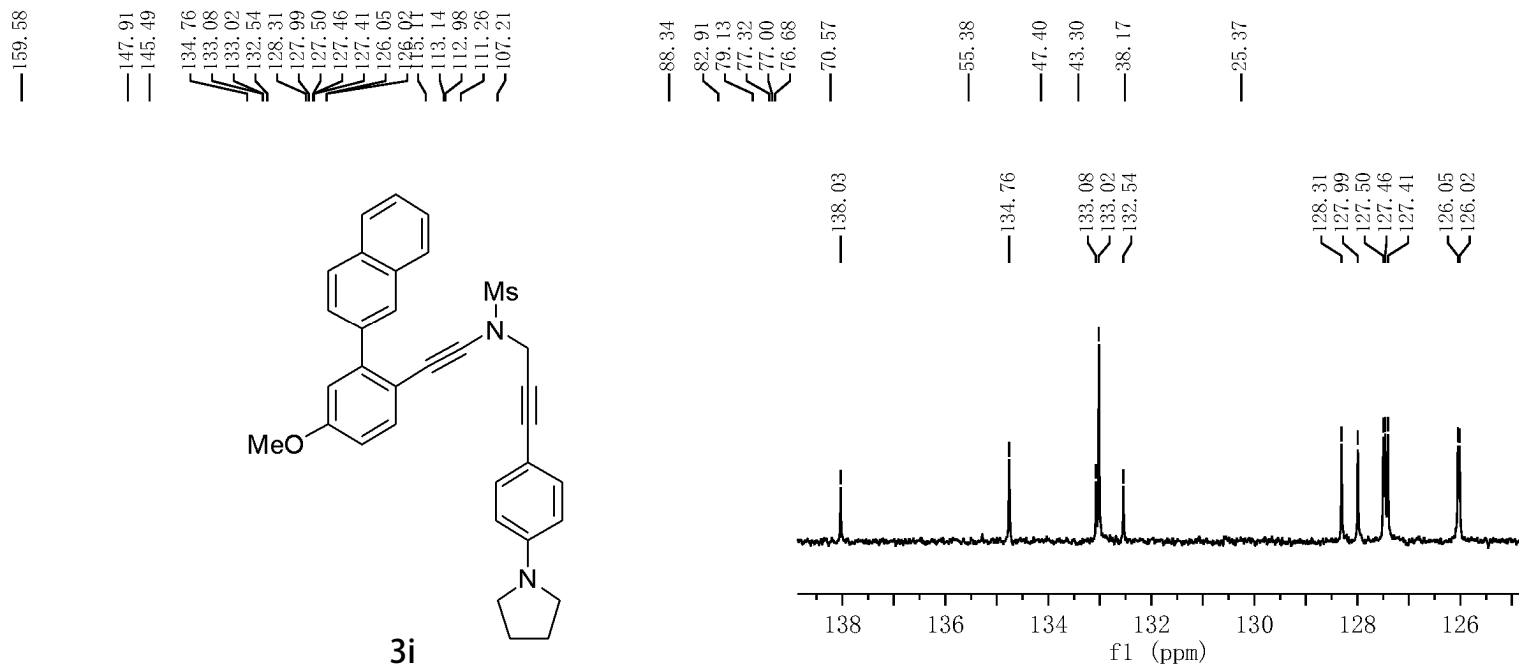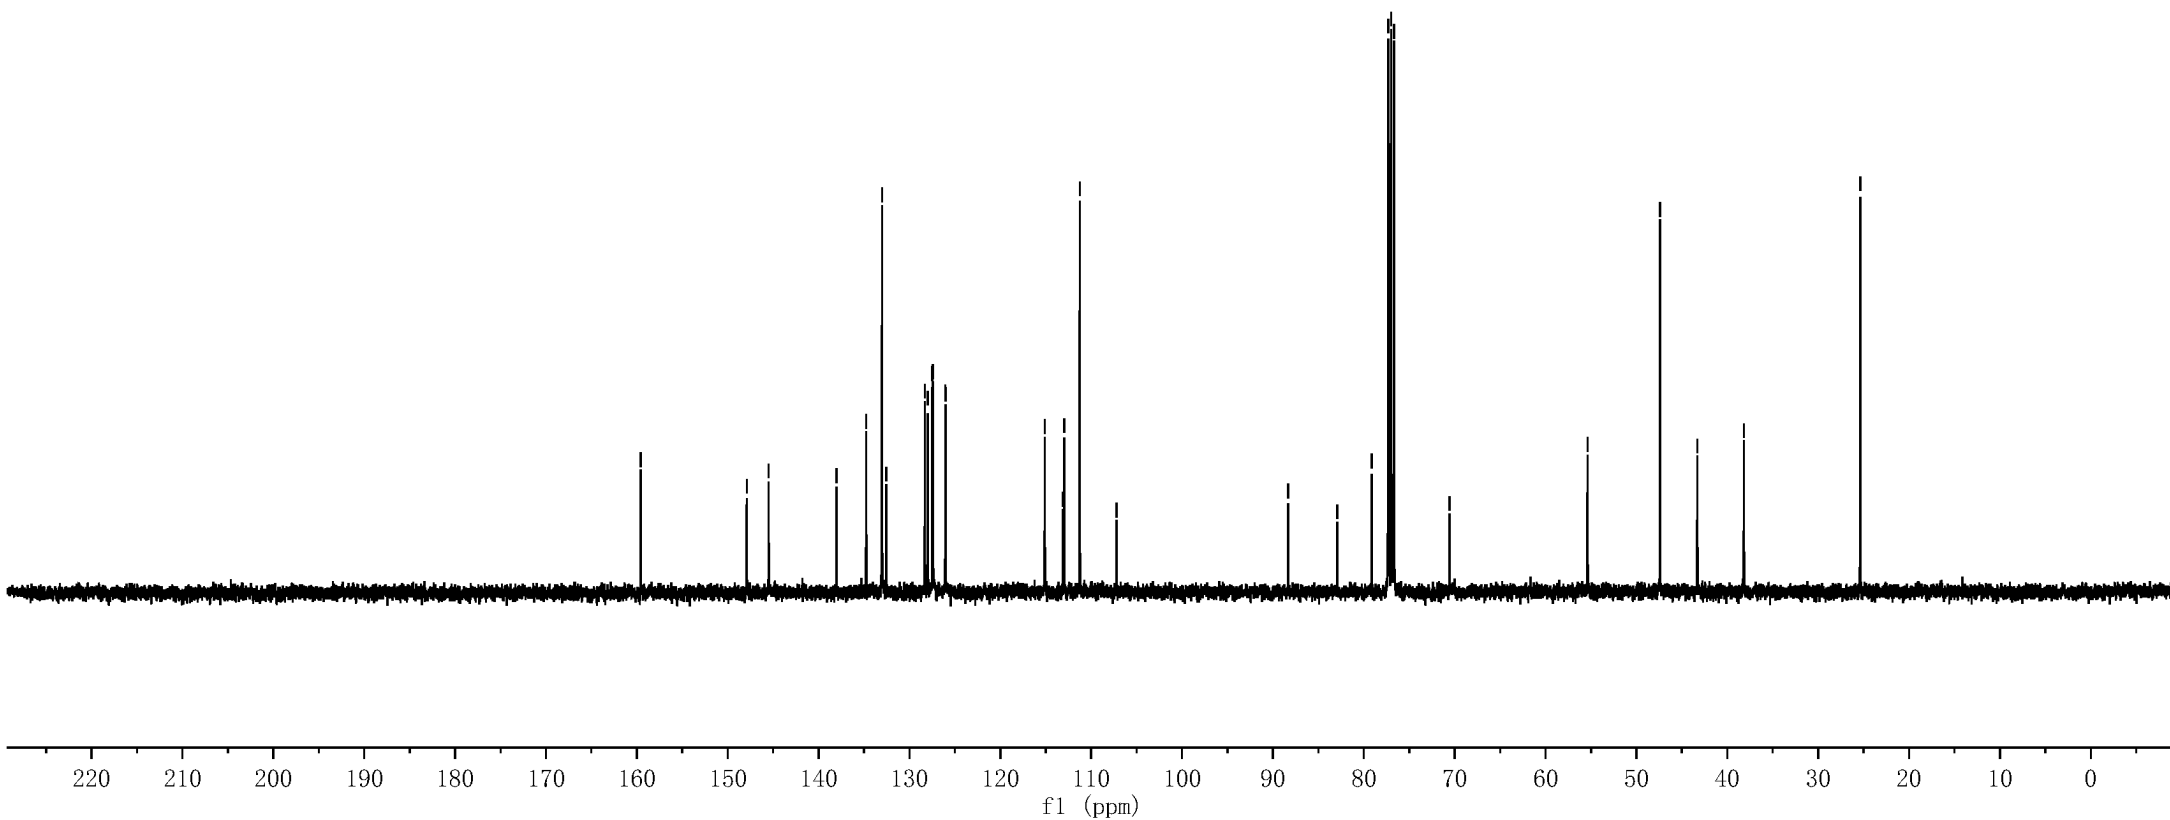

| Parameter                | Value               |
|--------------------------|---------------------|
| 1 Title                  | ZYX-4-17-H          |
| 2 Origin                 | Bruker Biospin GmbH |
| 3 Solvent                | CDCl3               |
| 4 Temperature            | 298.0               |
| 5 Number of Scans        | 9                   |
| 6 Acquisition Time       | 4.0894              |
| 7 Acquisition Date       | 2022-01-11T15:41:24 |
| 8 Spectrometer Frequency | 400.13              |
| 9 Spectral Width         | 8012.8              |

8.010  
7.896  
7.888  
7.881  
7.873  
7.830  
7.809  
7.792  
7.777  
7.719  
7.715  
7.697  
7.694  
7.457  
7.441  
7.425  
7.403  
7.274  
7.258  
7.180  
7.158  
7.077  
6.379

4.393

3.254  
3.238  
3.221

2.766

1.981  
1.965  
1.949

0.000

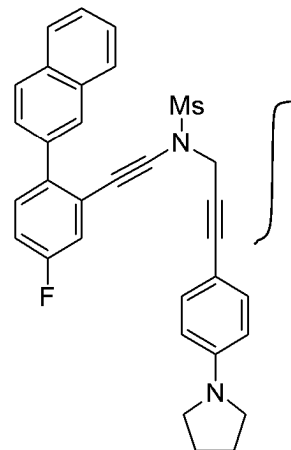

3j

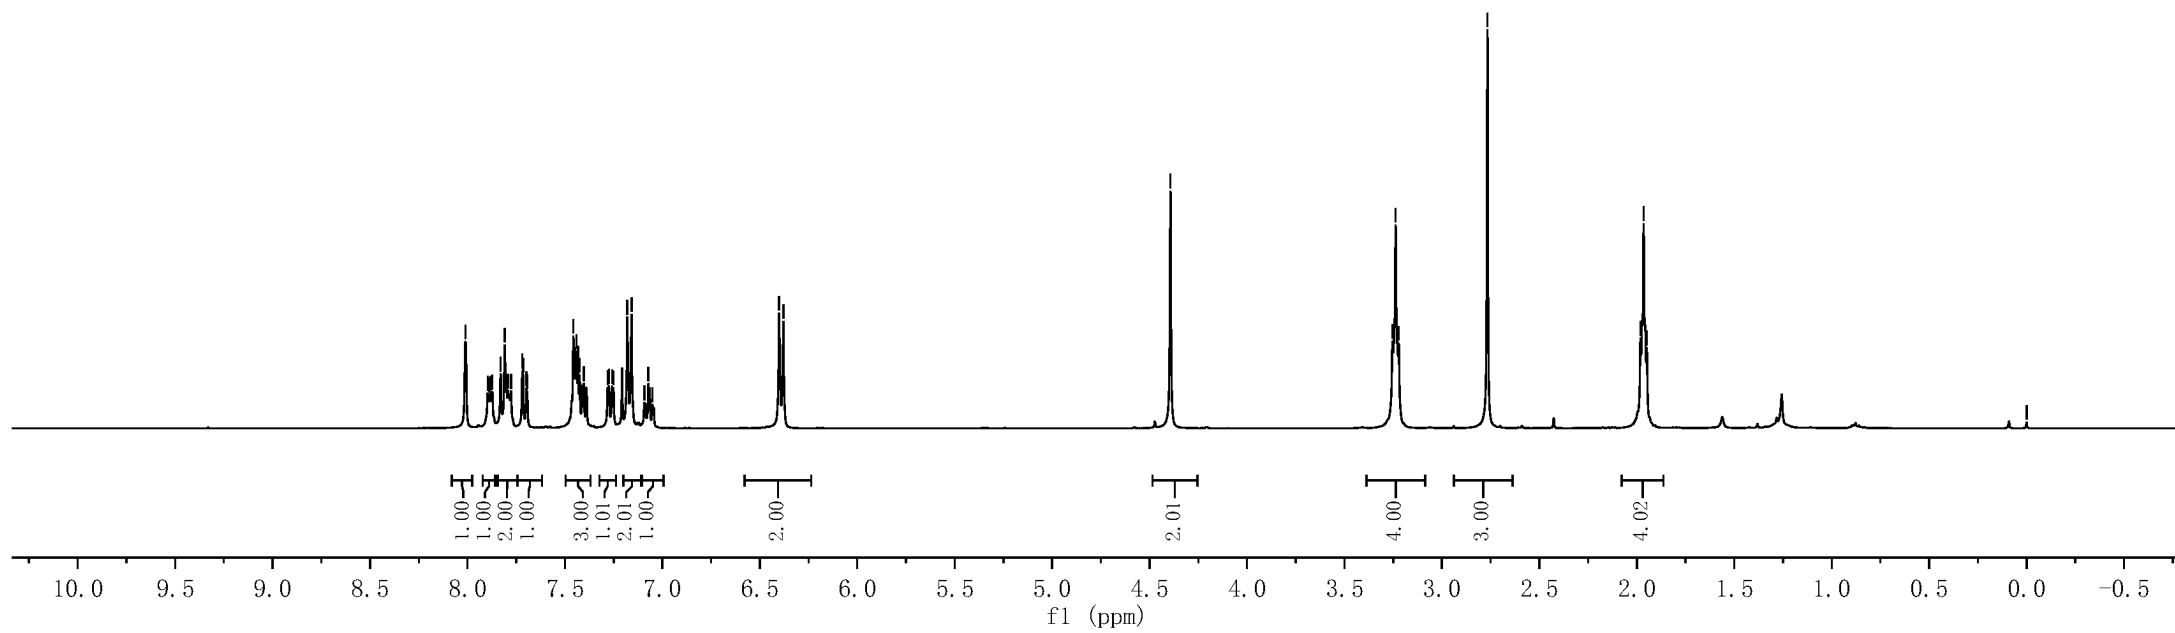

| Parameter                | Value               |
|--------------------------|---------------------|
| 1 Title                  | ZYX-4-17-C          |
| 2 Origin                 | Bruker BioSpin GmbH |
| 3 Solvent                | CDCl3               |
| 4 Temperature            | 300.0               |
| 5 Number of Scans        | 57                  |
| 6 Acquisition Time       | 1.3631              |
| 7 Acquisition Date       | 2022-01-11T15:42:46 |
| 8 Spectrometer Frequency | 100.61              |
| 9 Spectral Width         | 24038.5             |

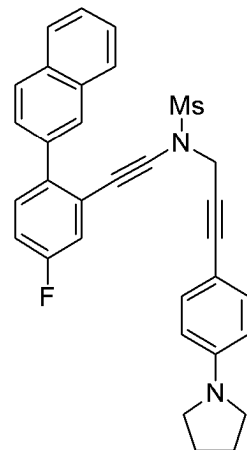

3j

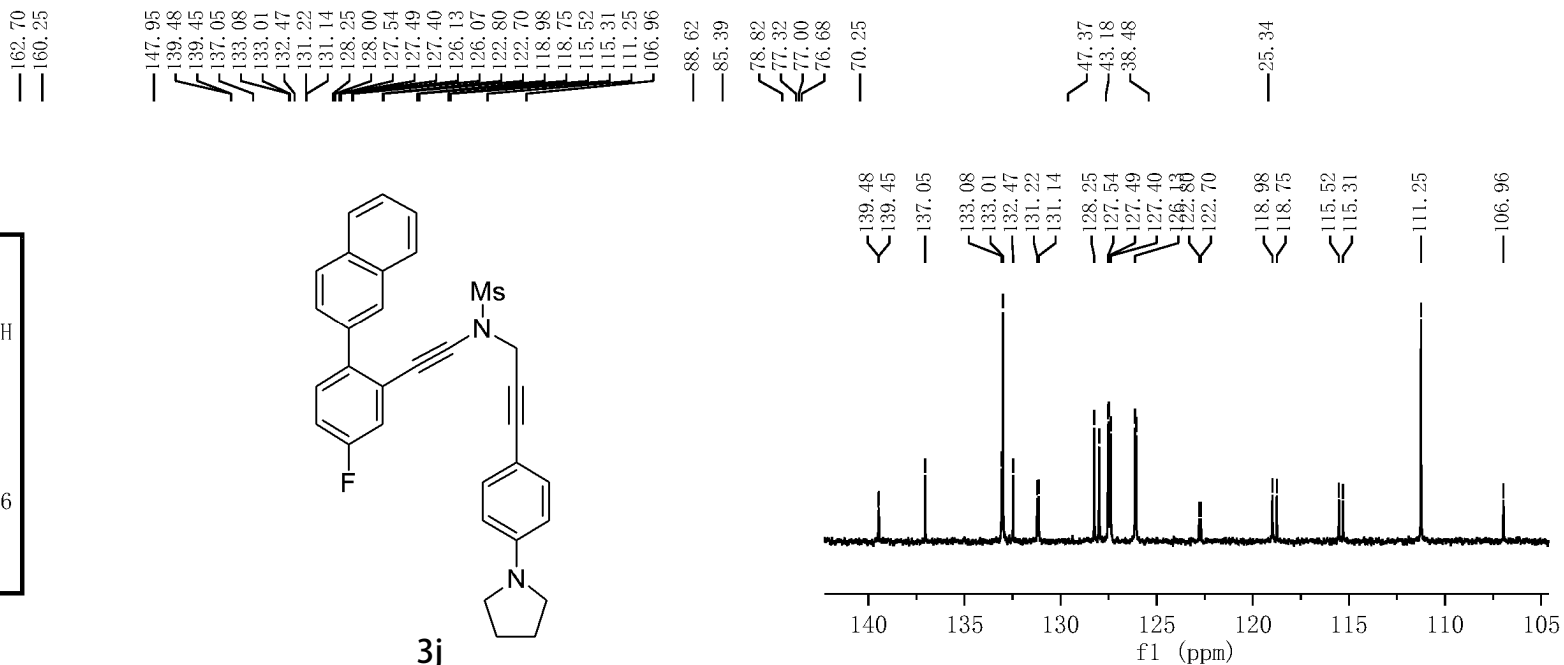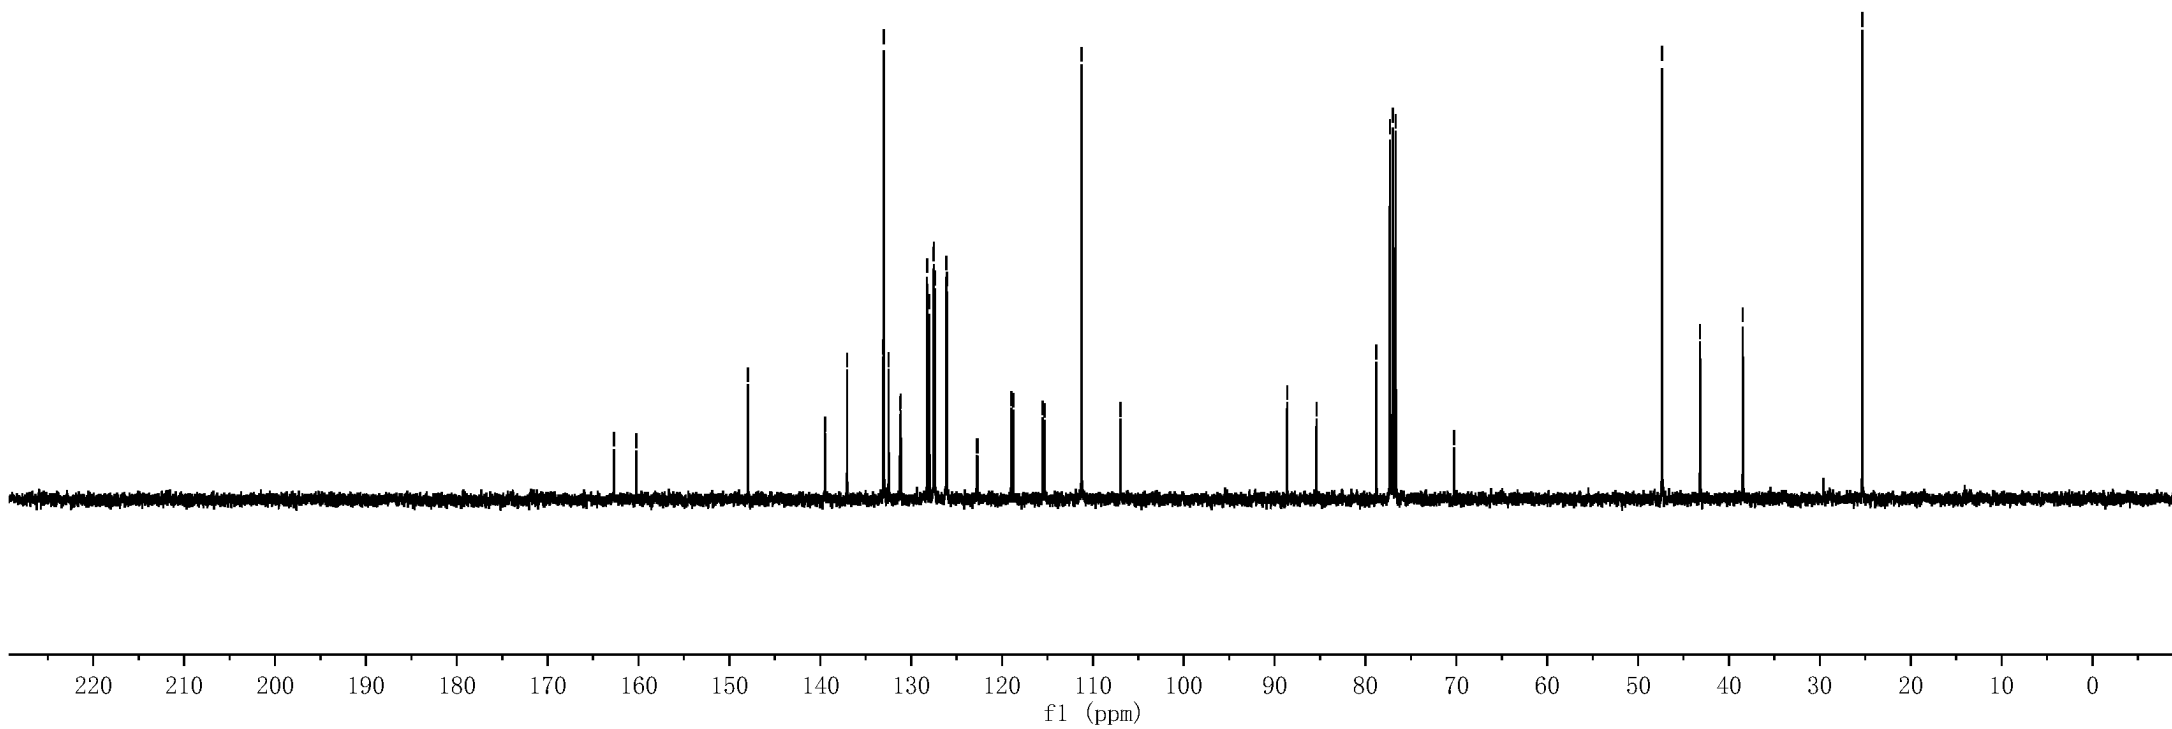

| Parameter                | Value               |
|--------------------------|---------------------|
| 1 Title                  | ZYX-4-17-F          |
| 2 Origin                 | Bruker BioSpin GmbH |
| 3 Solvent                | CDCl3               |
| 4 Temperature            | 295.5               |
| 5 Number of Scans        | 16                  |
| 6 Acquisition Time       | 0.7340              |
| 7 Acquisition Date       | 2022-01-19T16:38:11 |
| 8 Spectrometer Frequency | 376.31              |
| 9 Spectral Width         | 89285.7             |

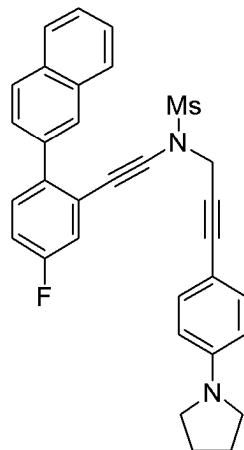

3j

—115.52

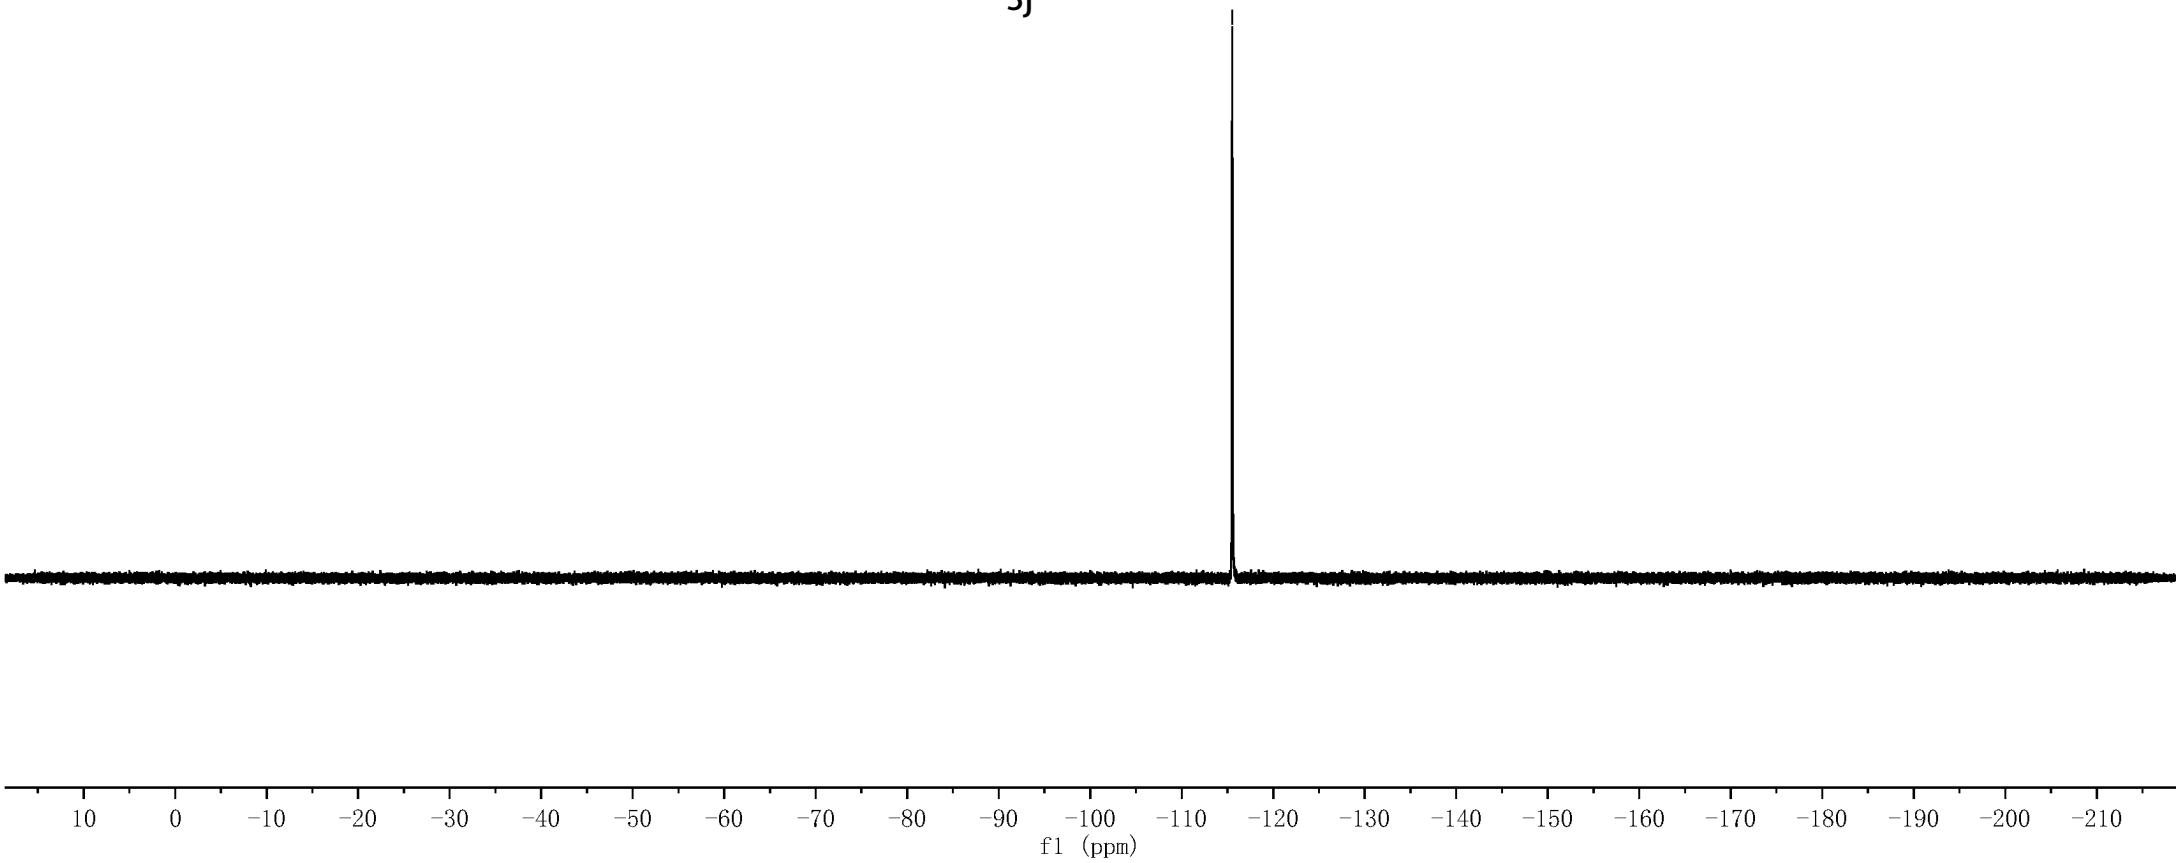

8.038  
8.035  
7.912  
7.906  
7.897  
7.888  
7.845  
7.824  
7.814  
7.805  
7.796  
7.790  
7.732  
7.728  
7.711  
7.706  
7.567  
7.561  
7.473  
7.466  
7.458  
7.449  
7.414  
7.393  
7.355  
7.349  
7.334  
7.328  
7.189  
7.167  
6.415  
6.392

| Parameter                | Value               |
|--------------------------|---------------------|
| 1 Title                  | zyx-4-8-h           |
| 2 Origin                 | Bruker BioSpin GmbH |
| 3 Solvent                | CDCl <sub>3</sub>   |
| 4 Temperature            | 295.4               |
| 5 Number of Scans        | 8                   |
| 6 Acquisition Time       | 3.9846              |
| 7 Acquisition Date       | 2022-01-08T15:58:17 |
| 8 Spectrometer Frequency | 399.93              |
| 9 Spectral Width         | 8223.7              |

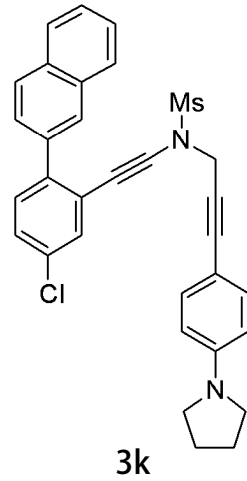

4.410

3.276  
3.265  
3.259  
3.254  
3.243

2.800

2.004  
1.995  
1.987  
1.979  
1.971

0.000

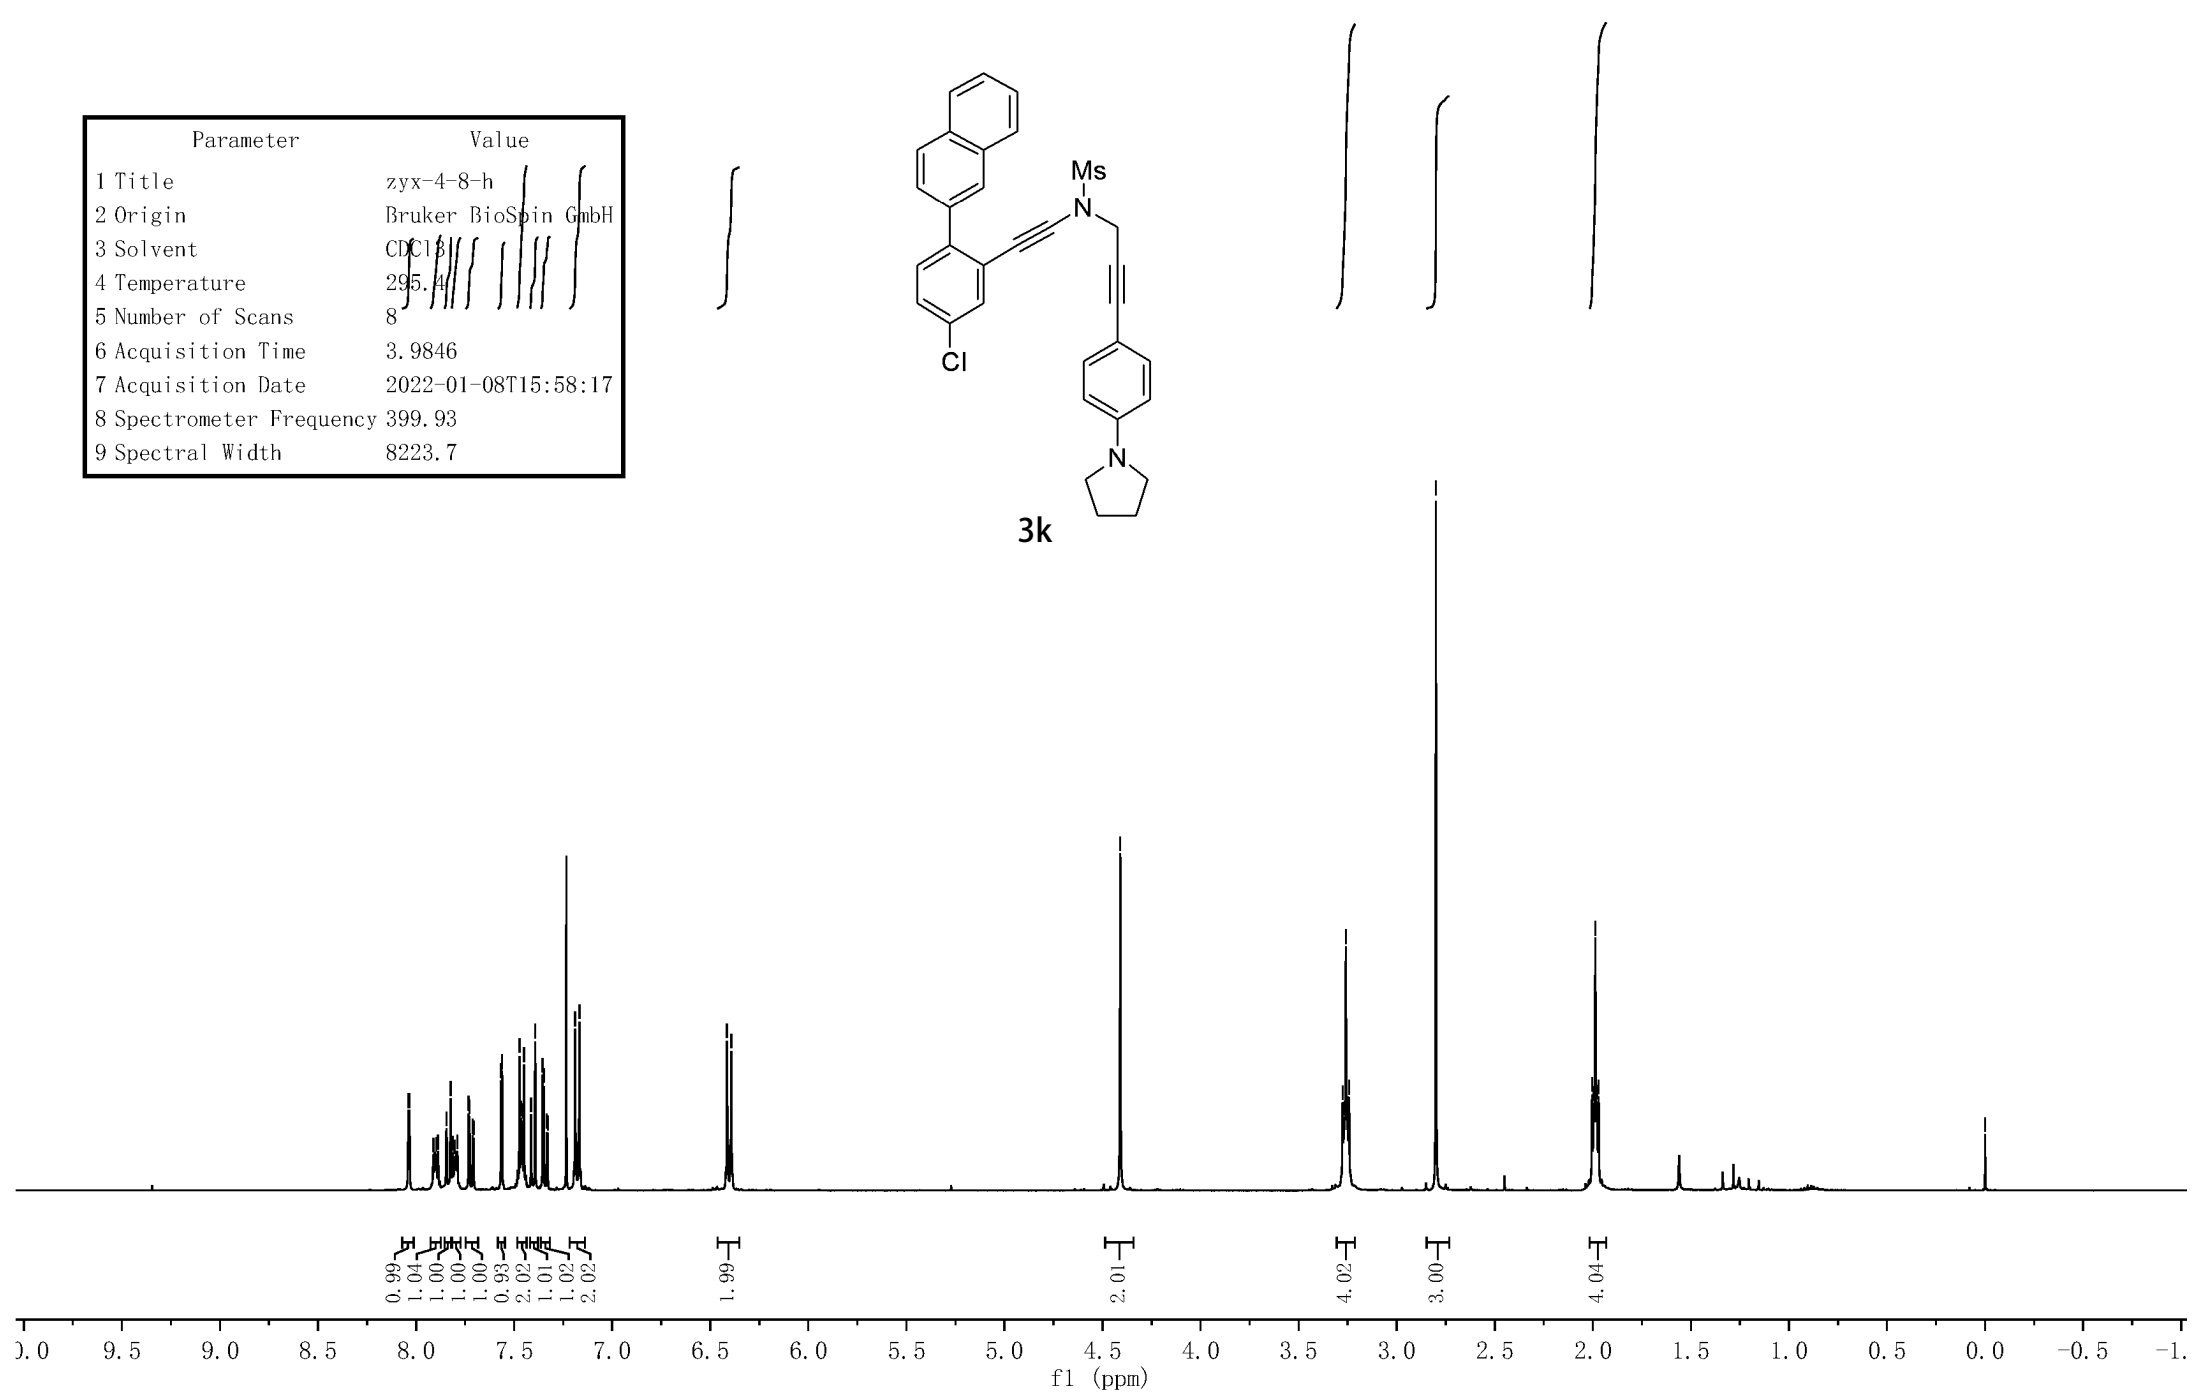



| Parameter                | Value               |
|--------------------------|---------------------|
| 1 Title                  | zyx-4-8-c           |
| 2 Origin                 | Bruker BioSpin GmbH |
| 3 Solvent                | CDCl3               |
| 4 Temperature            | 295.6               |
| 5 Number of Scans        | 85                  |
| 6 Acquisition Time       | 1.3631              |
| 7 Acquisition Date       | 2022-01-08T15:59:45 |
| 8 Spectrometer Frequency | 100.57              |
| 9 Spectral Width         | 24038.5             |

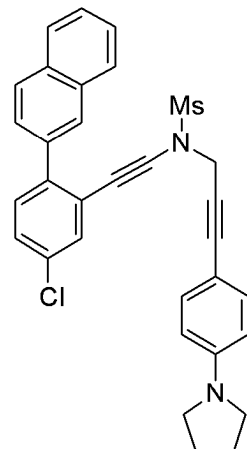

3k

147.96  
141.59  
133.07  
133.05  
132.87  
132.59  
132.10  
130.81  
128.33  
128.28  
128.02  
127.64  
127.53  
127.20  
126.20  
106.96

88.67  
85.60  
78.83  
77.32  
77.00  
76.68  
70.12

47.41  
43.24  
38.56

25.39

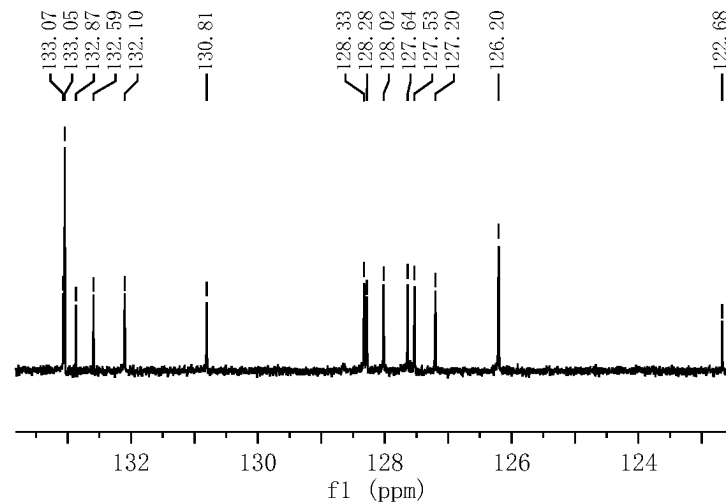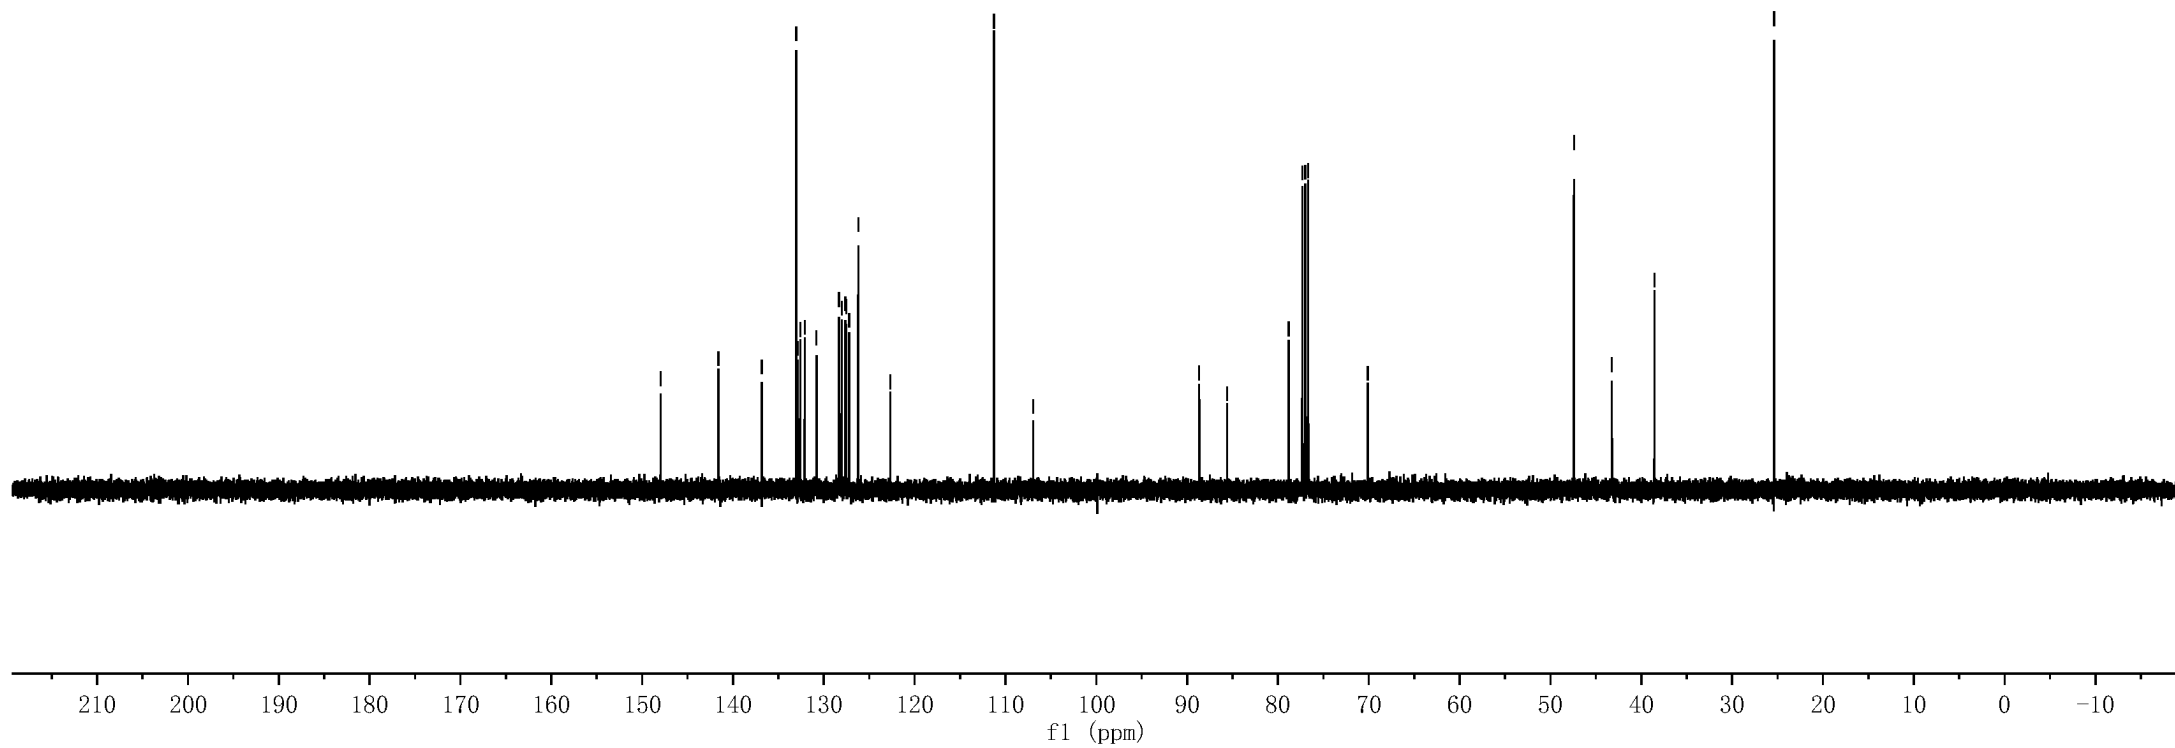

| Parameter                | Value               |
|--------------------------|---------------------|
| 1 Title                  | ZYX-4-69-H          |
| 2 Origin                 | Bruker BioSpin GmbH |
| 3 Solvent                | CDCl <sub>3</sub>   |
| 4 Temperature            | 298.0               |
| 5 Number of Scans        | 14                  |
| 6 Acquisition Time       | 4.0894              |
| 7 Acquisition Date       | 2022-02-16T16:31:14 |
| 8 Spectrometer Frequency | 400.13              |
| 9 Spectral Width         | 8012.8              |

8.052  
7.898  
7.890  
7.884  
7.876  
7.821  
7.799  
7.776  
7.755  
7.443  
7.435  
7.428  
7.419  
7.366  
7.215  
7.201  
7.180  
6.399  
6.376

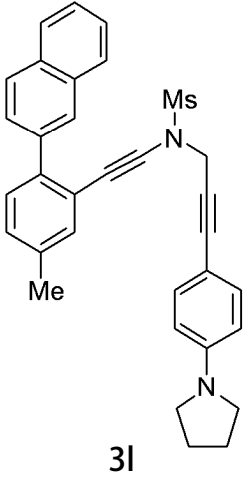

4.411  
3.259  
3.243  
3.228  
2.801  
2.365  
1.987  
1.972  
1.956  
0.000

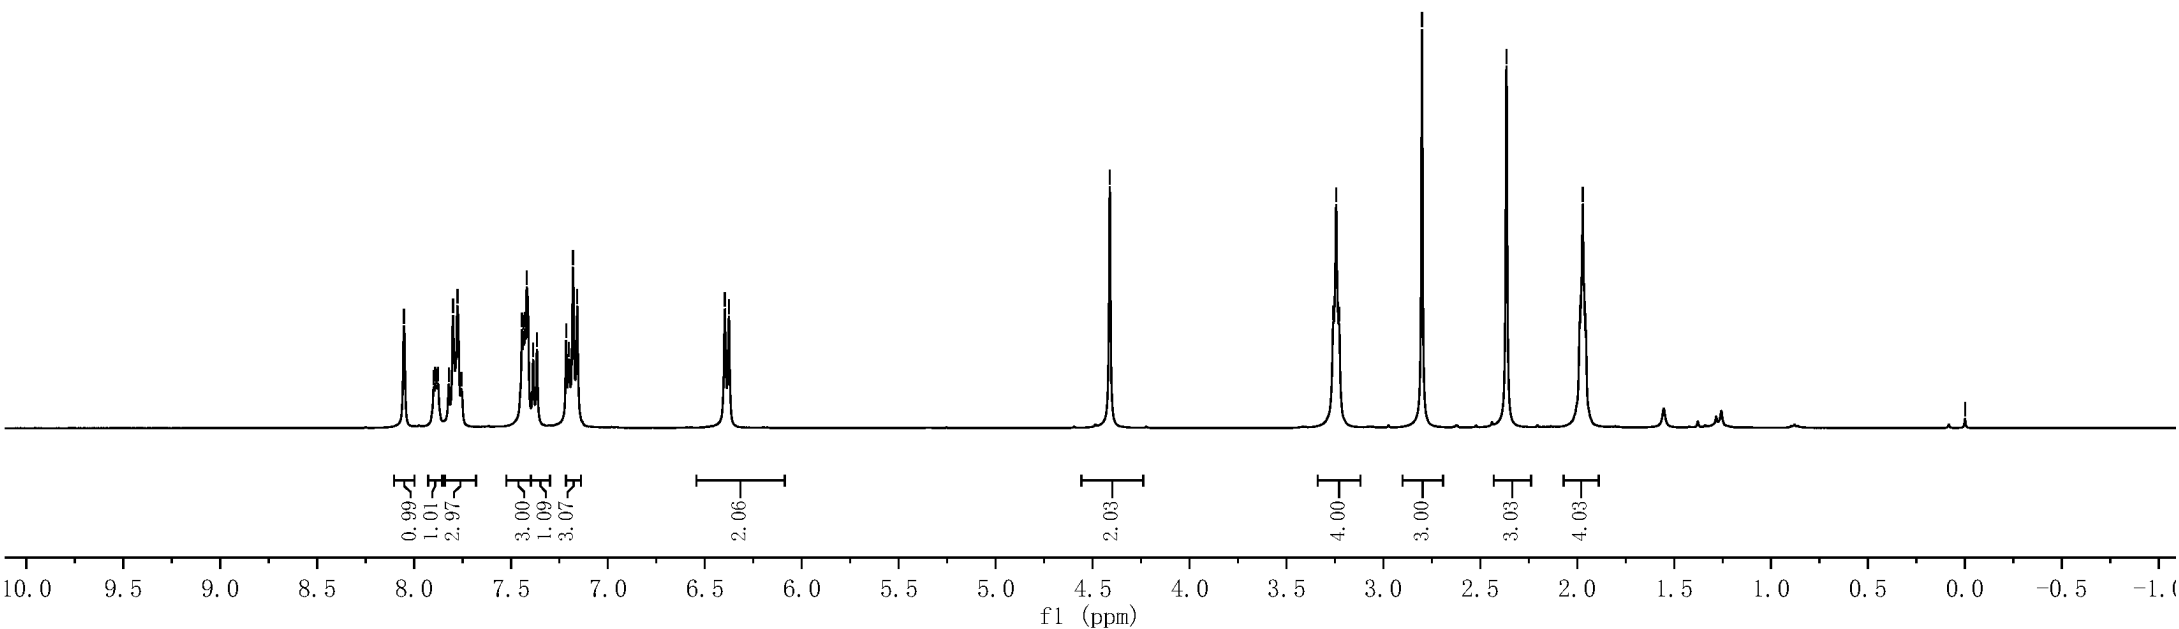

| Parameter                | Value               |
|--------------------------|---------------------|
| 1 Title                  | ZYX-4-69-C          |
| 2 Origin                 | Bruker BioSpin GmbH |
| 3 Solvent                | CDCl3               |
| 4 Temperature            | 300.0               |
| 5 Number of Scans        | 64                  |
| 6 Acquisition Time       | 1.3631              |
| 7 Acquisition Date       | 2022-02-16T16:33:19 |
| 8 Spectrometer Frequency | 100.61              |
| 9 Spectral Width         | 24038.5             |

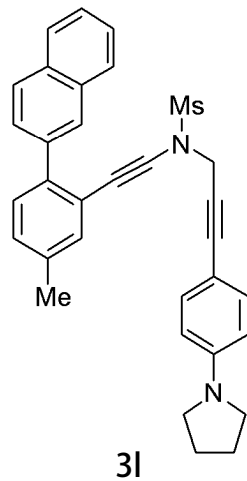

147.92  
133.27  
133.03  
129.52  
128.26  
127.87  
127.61  
127.49  
127.38  
125.97  
125.85

111.25  
107.15

88.48  
84.15  
79.04  
77.32  
77.00  
76.68  
71.15

47.39  
43.27  
38.33  
25.36  
20.80

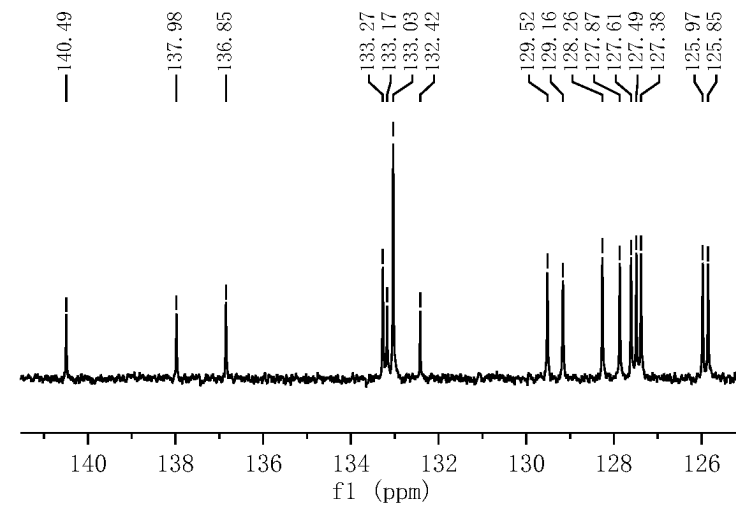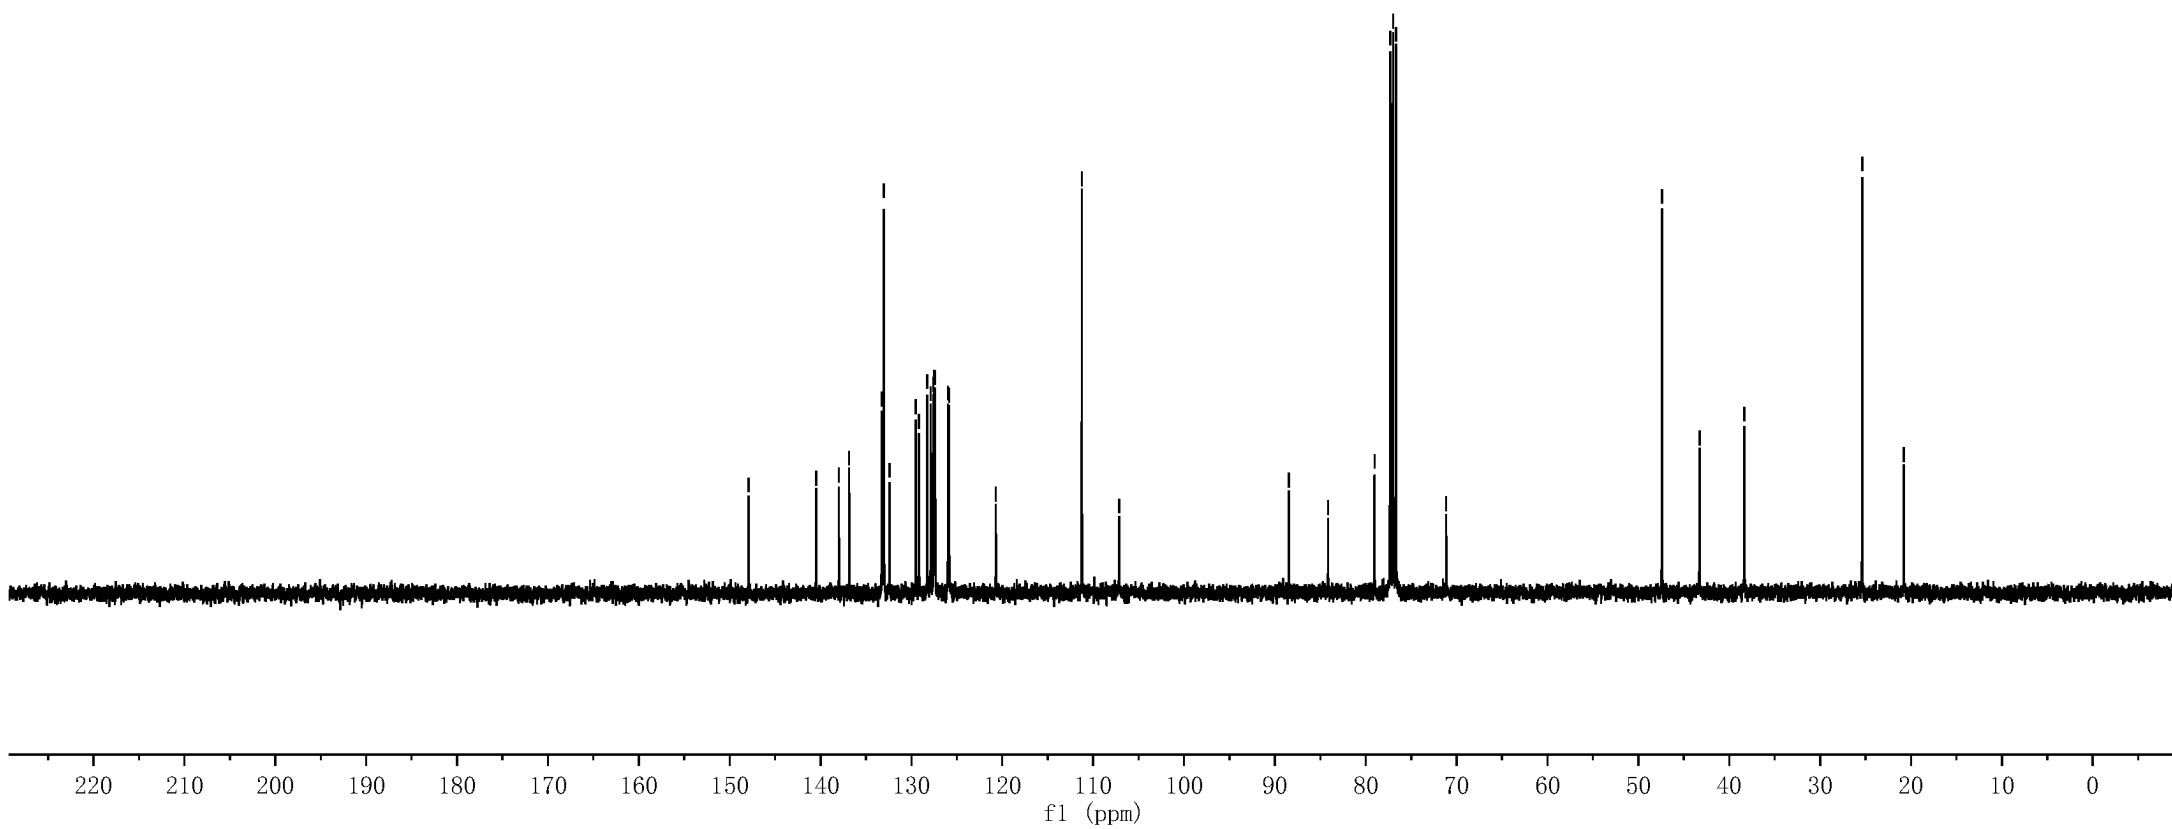

| Parameter                | Value               |
|--------------------------|---------------------|
| 1 Title                  | ZYX-3-241-H         |
| 2 Origin                 | Bruker BioSpin GmbH |
| 3 Solvent                | CDCl <sub>3</sub>   |
| 4 Temperature            | 298.0               |
| 5 Number of Scans        | 6                   |
| 6 Acquisition Time       | 4.0894              |
| 7 Acquisition Date       | 2022-01-05T17:25:20 |
| 8 Spectrometer Frequency | 400.13              |
| 9 Spectral Width         | 8012.8              |

8.026  
7.894  
7.886  
7.876  
7.870  
7.815  
7.793  
7.762  
7.740  
7.442  
7.433  
7.418  
7.401  
7.380  
7.180  
7.158  
7.101  
6.999  
6.377

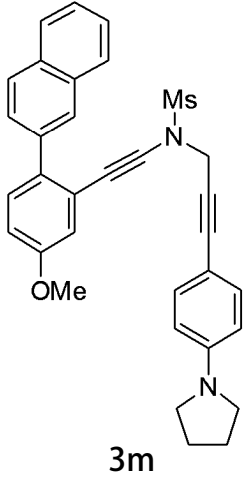

4.419  
3.823  
3.265  
3.248  
3.232  
2.794  
1.994  
1.986  
1.978  
1.970  
1.961  
0.000

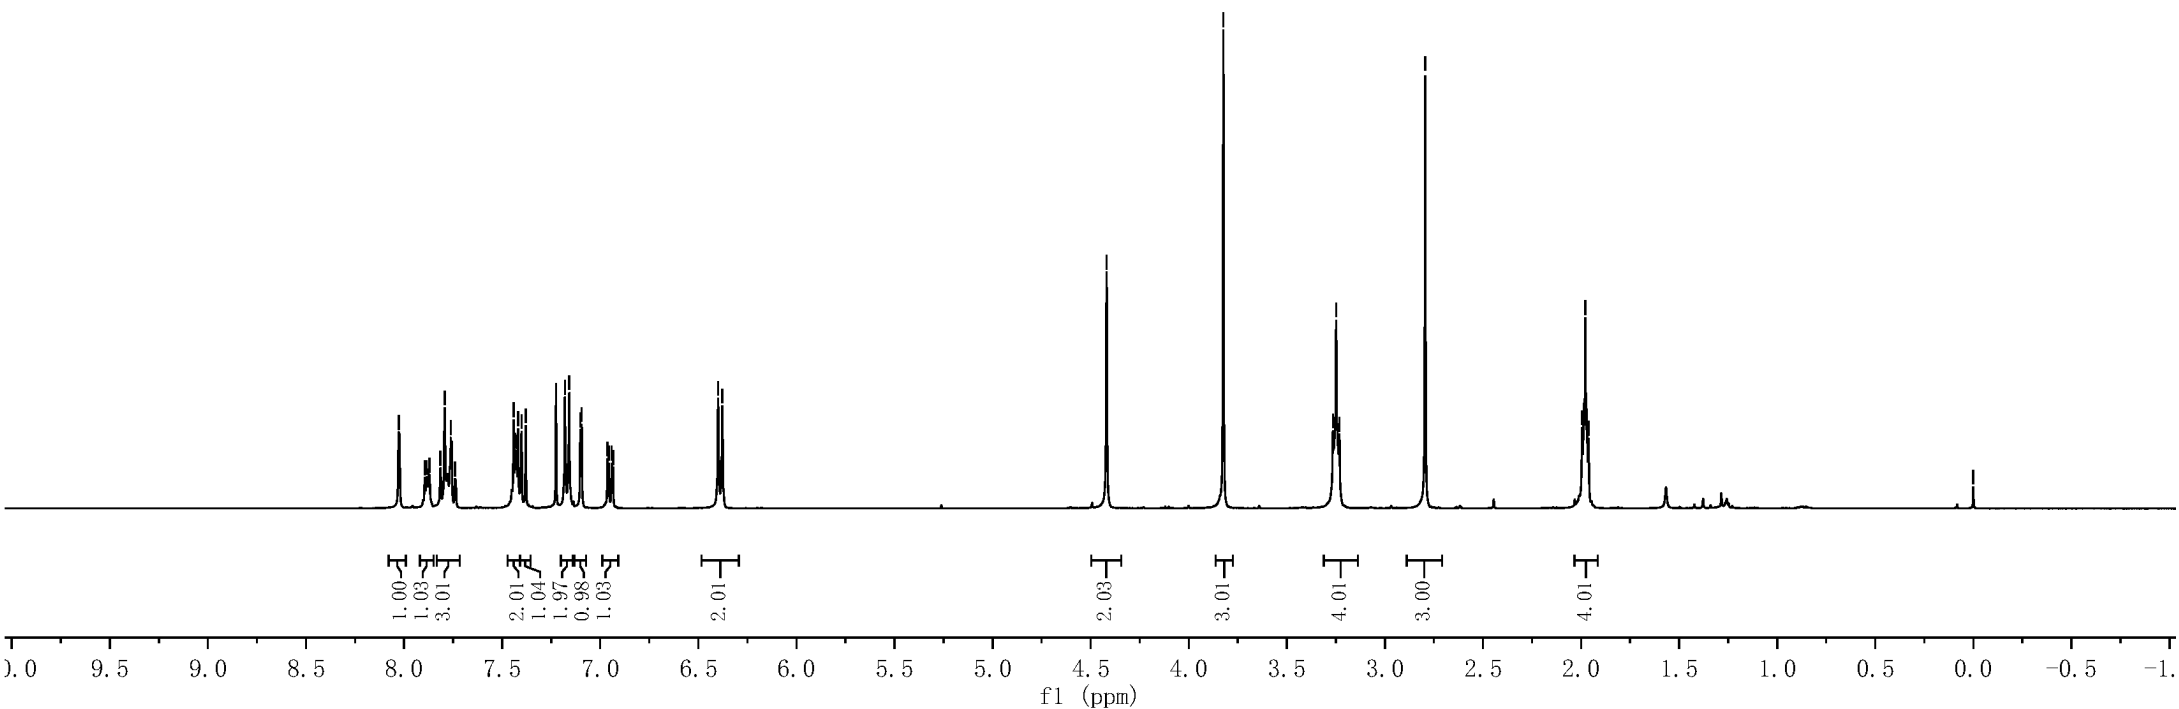

| Parameter                | Value               |
|--------------------------|---------------------|
| 1 Title                  | ZYX-3-241-C         |
| 2 Origin                 | Bruker BioSpin GmbH |
| 3 Solvent                | CDCl3               |
| 4 Temperature            | 300.0               |
| 5 Number of Scans        | 43                  |
| 6 Acquisition Time       | 1.3631              |
| 7 Acquisition Date       | 2022-01-05T17:26:46 |
| 8 Spectrometer Frequency | 100.61              |
| 9 Spectral Width         | 24038.5             |

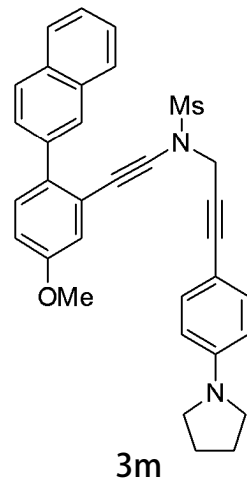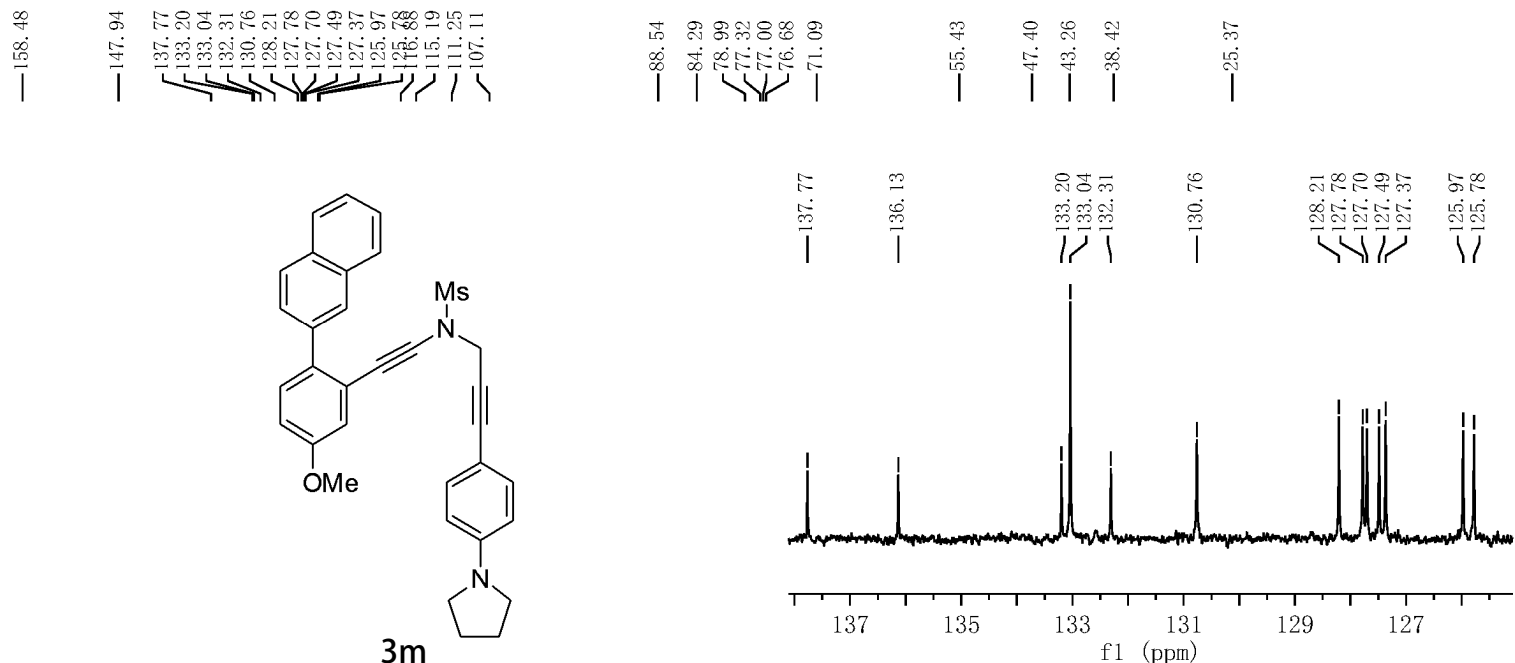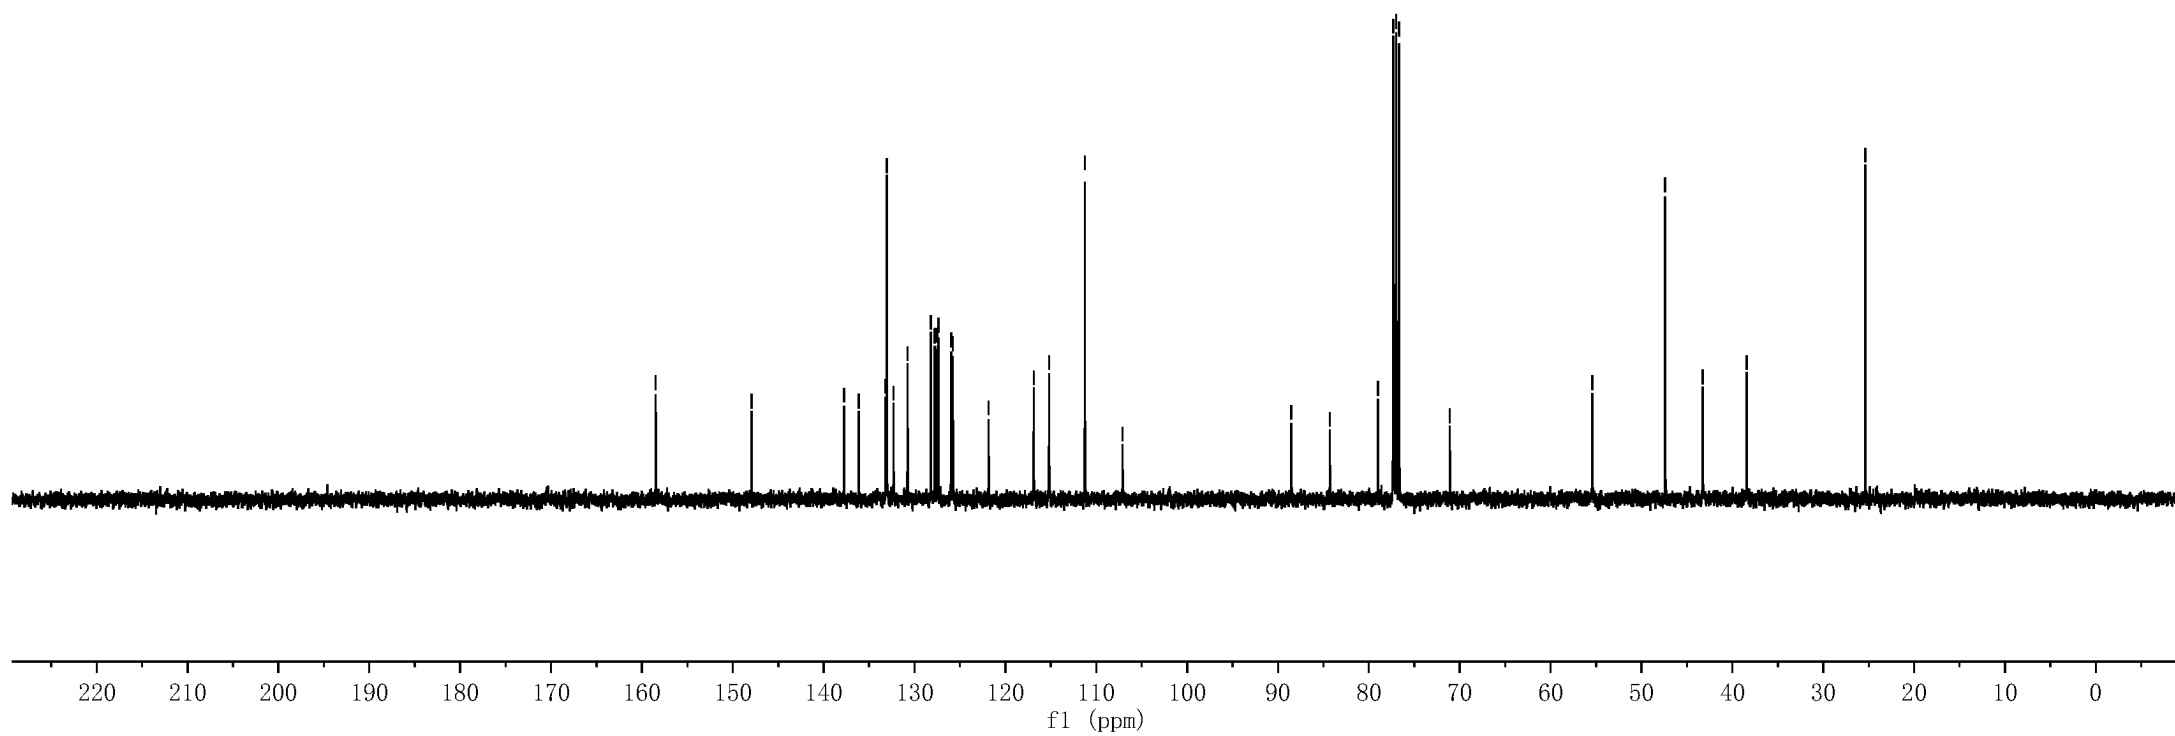

| Parameter                | Value               |
|--------------------------|---------------------|
| 1 Title                  | zyx-4-95-h          |
| 2 Origin                 | Bruker BioSpin GmbH |
| 3 Solvent                | CDCl3               |
| 4 Temperature            | 298.0               |
| 5 Number of Scans        | 11                  |
| 6 Acquisition Time       | 4.0894              |
| 7 Acquisition Date       | 2022-02-23T09:24:51 |
| 8 Spectrometer Frequency | 400.13              |
| 9 Spectral Width         | 8012.8              |

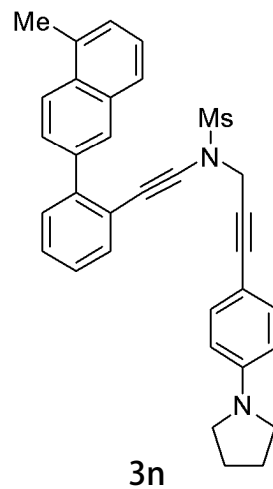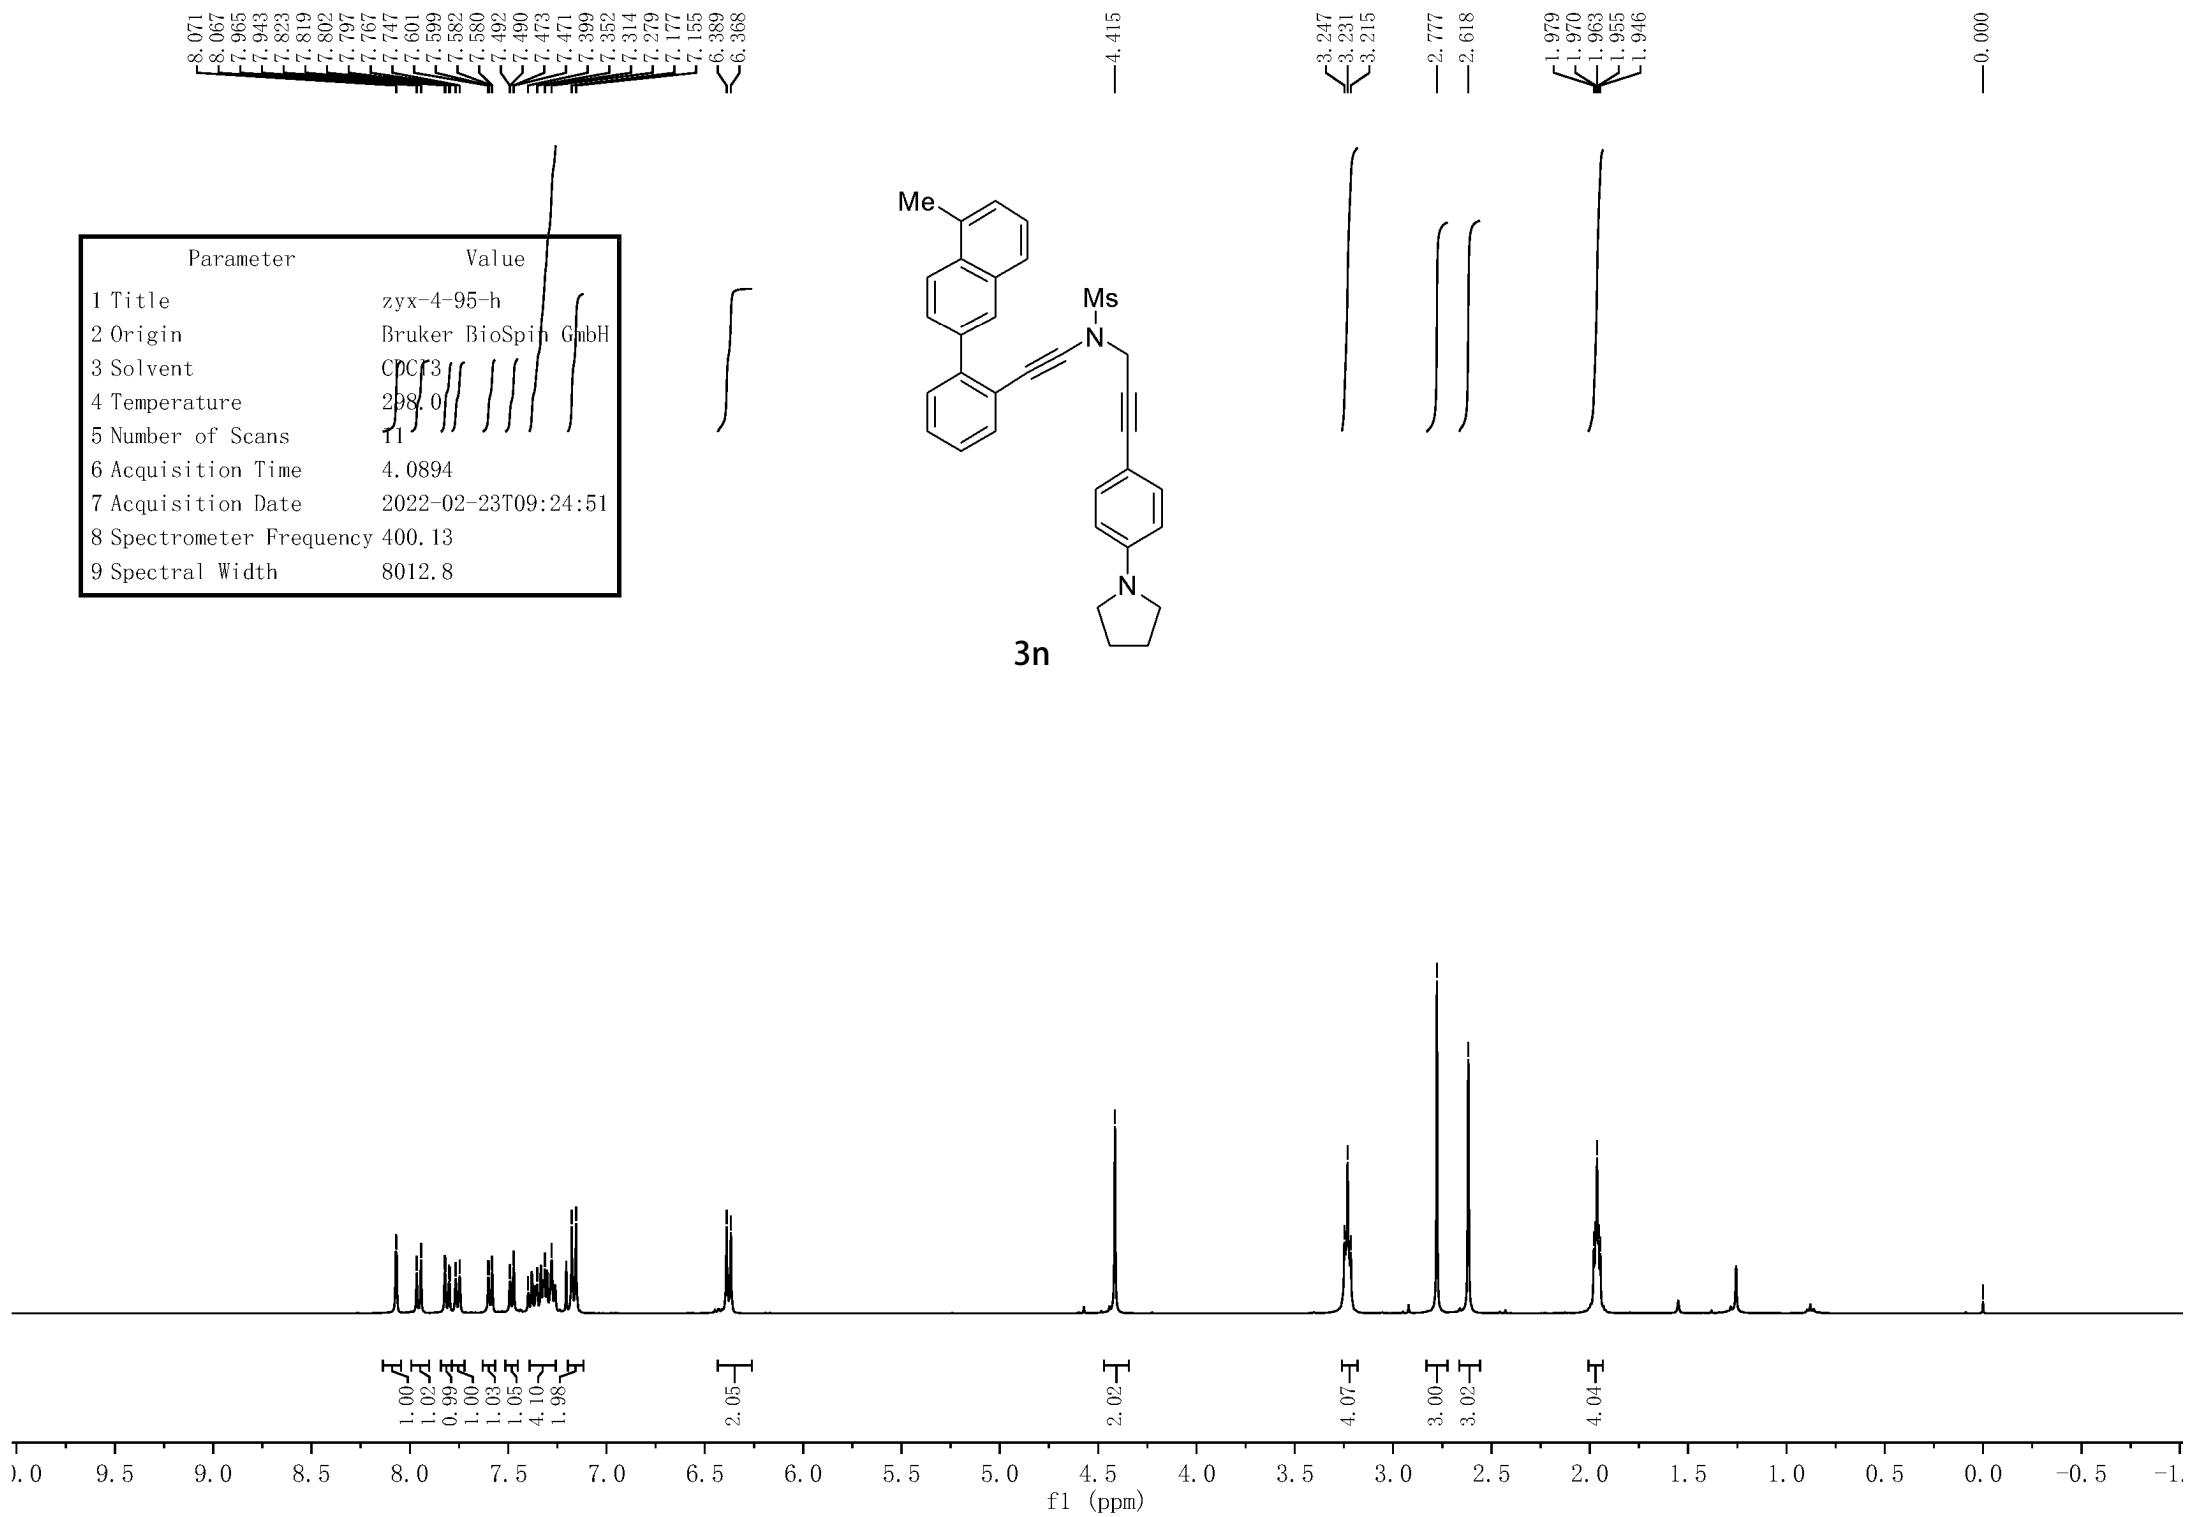

| Parameter                | Value               |
|--------------------------|---------------------|
| 1 Title                  | zyx-4-95-c          |
| 2 Origin                 | Bruker BioSpin GmbH |
| 3 Solvent                | CDCl3               |
| 4 Temperature            | 300.0               |
| 5 Number of Scans        | 45                  |
| 6 Acquisition Time       | 1.3631              |
| 7 Acquisition Date       | 2022-02-23T09:26:44 |
| 8 Spectrometer Frequency | 100.61              |
| 9 Spectral Width         | 24038.5             |

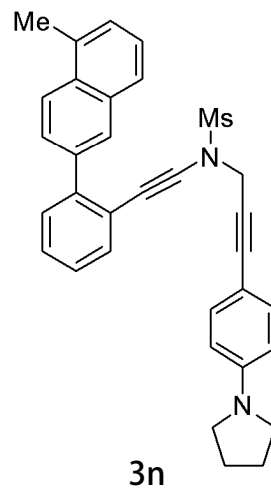

147.90  
143.34  
133.94  
133.01  
132.89  
131.65  
129.61  
128.60  
128.24  
127.30  
126.76  
126.69  
125.79  
123.77  
107.09

88.47  
84.45  
79.03  
77.32  
77.00  
76.68  
70.94  
47.37  
43.27  
38.36  
25.35  
19.28

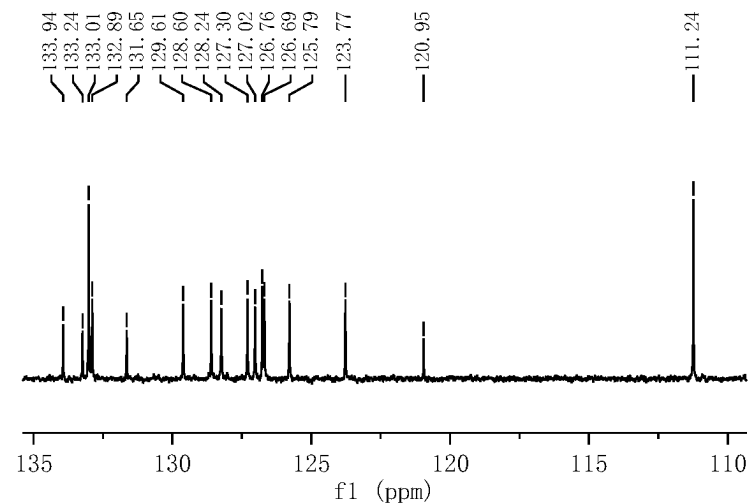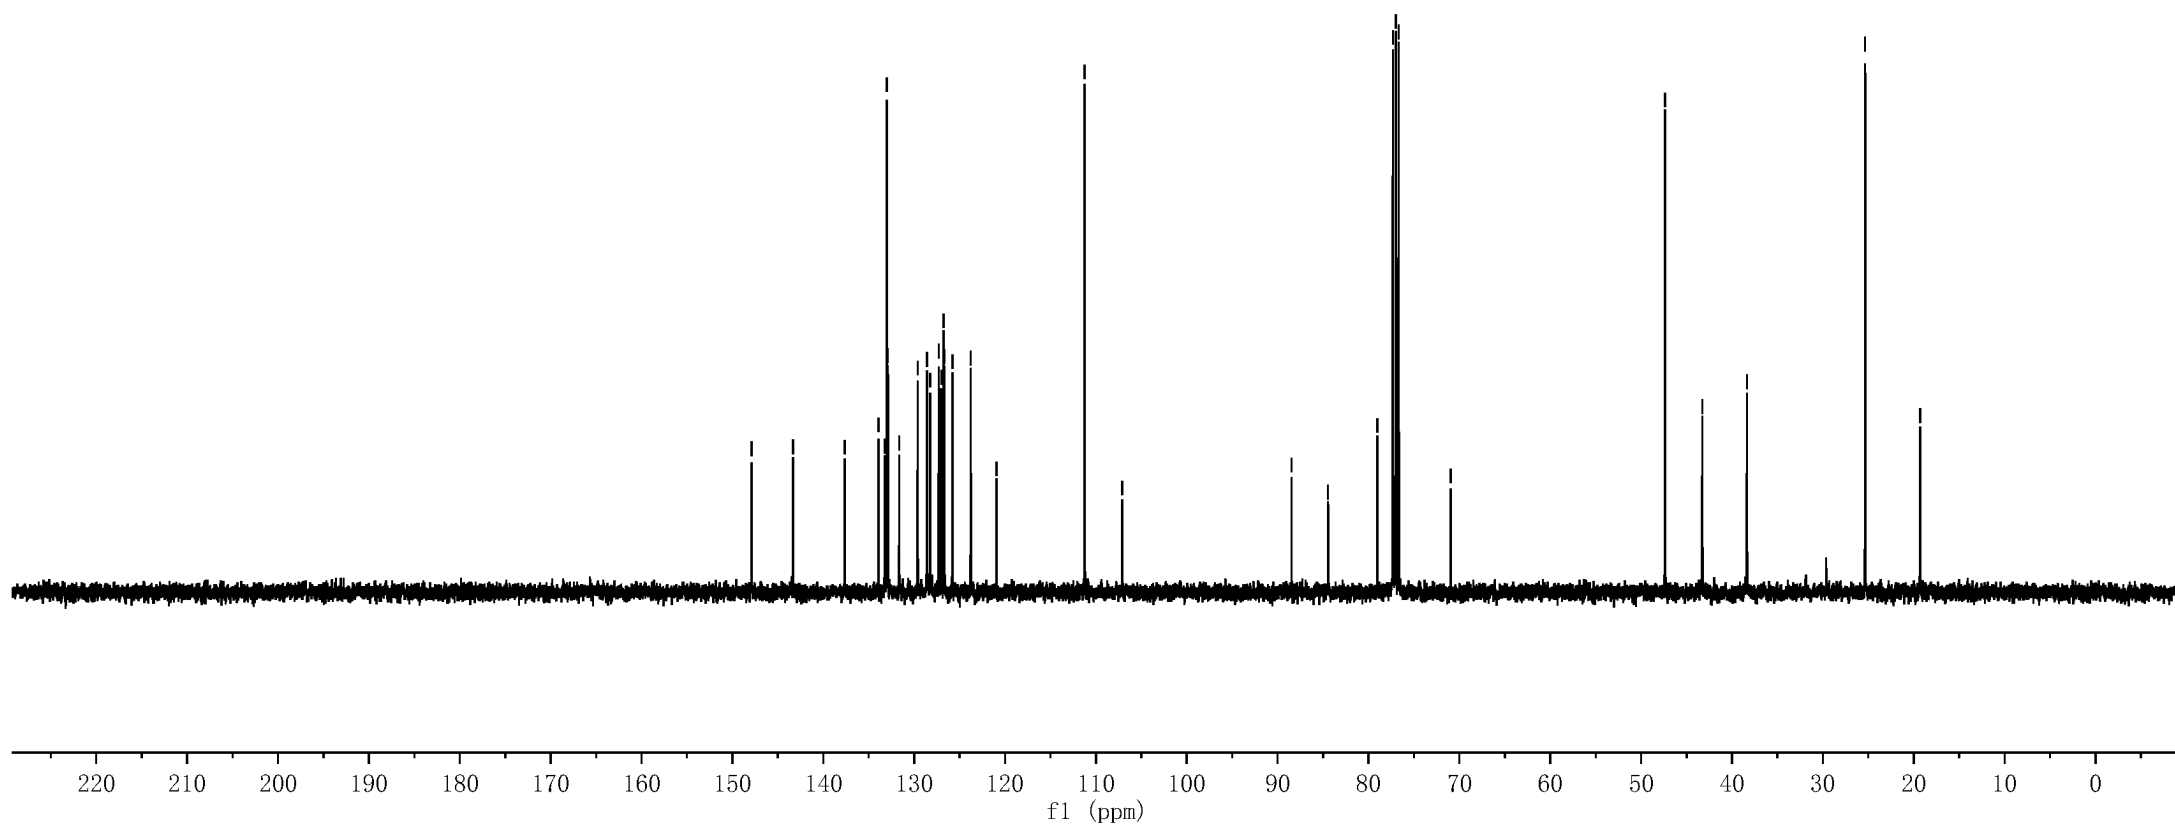

| Parameter                | Value               |
|--------------------------|---------------------|
| 1 Title                  | zyx-4-89-h          |
| 2 Origin                 | Bruker BioSpin GmbH |
| 3 Solvent                | CDCl <sub>3</sub>   |
| 4 Temperature            | 298.0               |
| 5 Number of Scans        | 9                   |
| 6 Acquisition Time       | 4.0894              |
| 7 Acquisition Date       | 2022-02-21T16:08:47 |
| 8 Spectrometer Frequency | 400.13              |
| 9 Spectral Width         | 8012.8              |

8.285  
8.263  
8.042  
8.039  
7.572  
7.570  
7.495  
7.485  
7.474  
7.467  
7.370  
7.167  
7.146  
6.786  
6.767  
6.390  
6.368

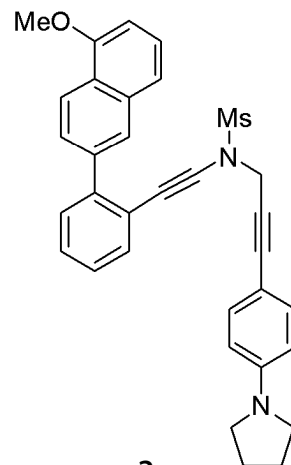

4.413  
3.964  
3.252  
3.236  
3.220  
2.811  
1.981  
1.972  
1.965  
1.958  
1.949  
-0.000

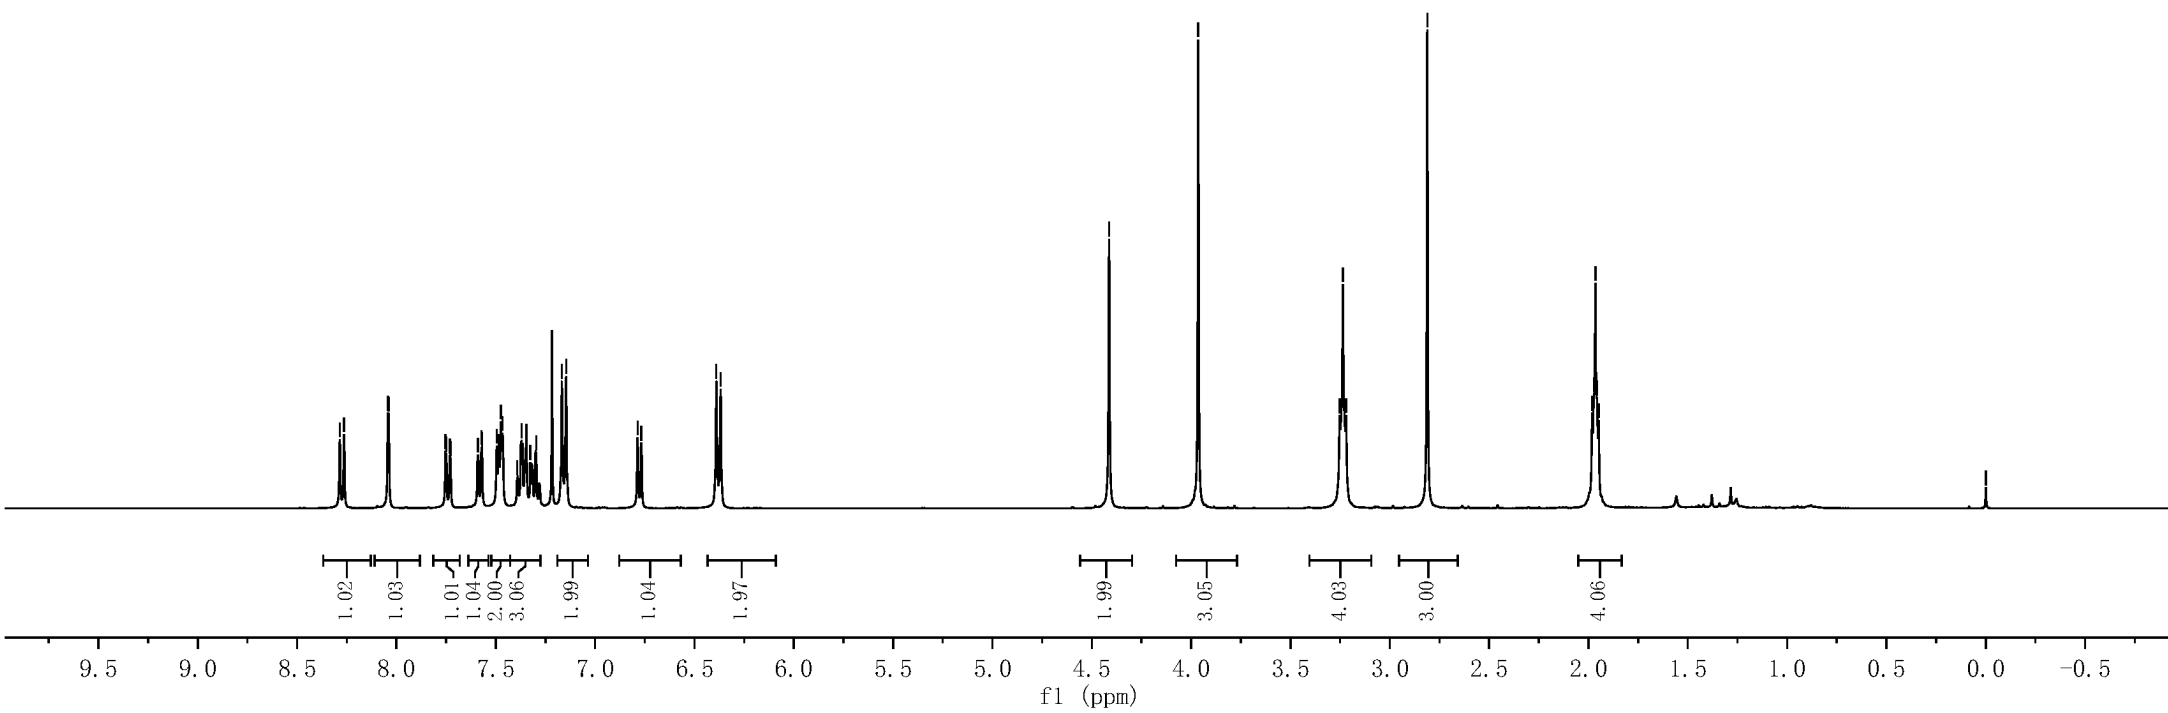



| Parameter                | Value               |
|--------------------------|---------------------|
| 1 Title                  | zyx-4-89-c          |
| 2 Origin                 | Bruker BioSpin GmbH |
| 3 Solvent                | CDC13               |
| 4 Temperature            | 300.0               |
| 5 Number of Scans        | 42                  |
| 6 Acquisition Time       | 1.3631              |
| 7 Acquisition Date       | 2022-02-21T16:10:07 |
| 8 Spectrometer Frequency | 100.61              |
| 9 Spectral Width         | 24038.5             |

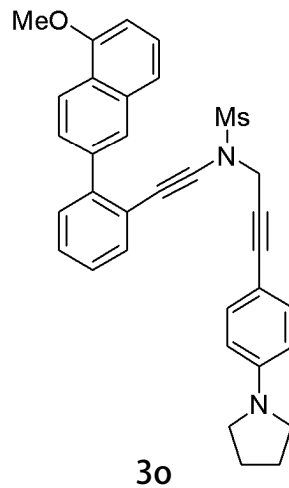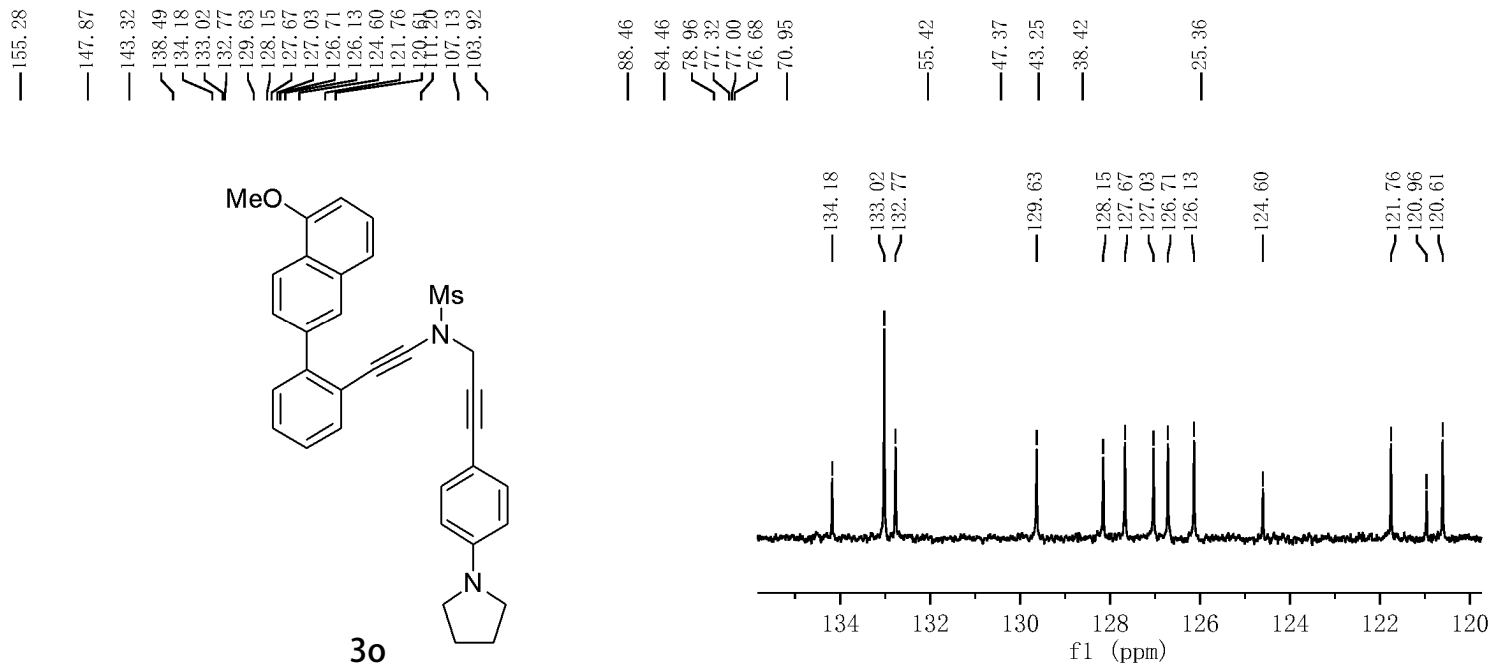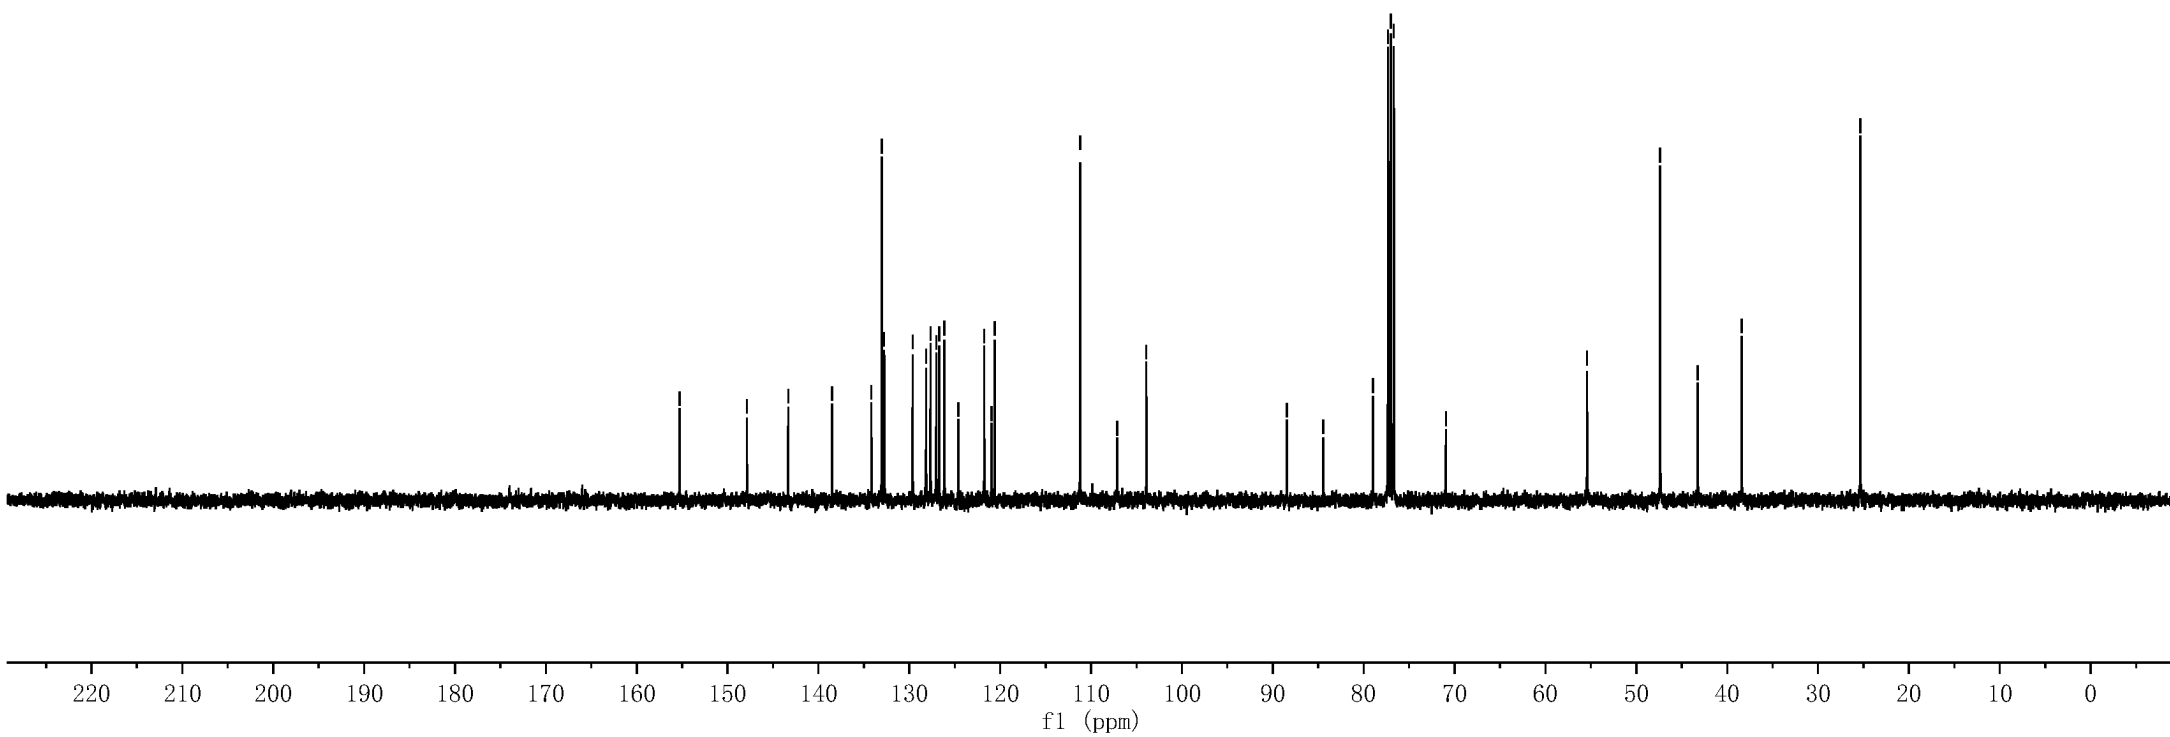

| Parameter                | Value               |
|--------------------------|---------------------|
| 1 Title                  | ZYX-3-279-H         |
| 2 Origin                 | Bruker BioSpin GmbH |
| 3 Solvent                | CDCl <sub>3</sub>   |
| 4 Temperature            | 295.3               |
| 5 Number of Scans        | 15                  |
| 6 Acquisition Time       | 3.9846              |
| 7 Acquisition Date       | 2022-01-01T16:16:15 |
| 8 Spectrometer Frequency | 399.93              |
| 9 Spectral Width         | 8223.7              |

8.044  
7.837  
7.814  
7.792  
7.740  
7.725  
7.704  
7.610  
7.592  
7.477  
7.458  
7.400  
7.382  
7.360  
7.330  
7.247  
7.159  
7.138  
6.420  
6.398

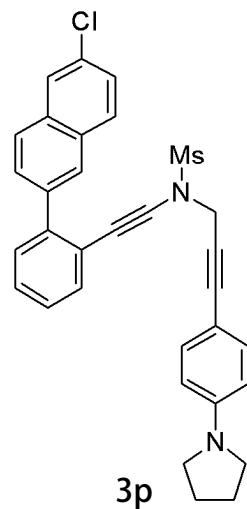

4.428

3.340  
3.282  
3.220

2.823

2.037  
2.005  
1.948

0.000

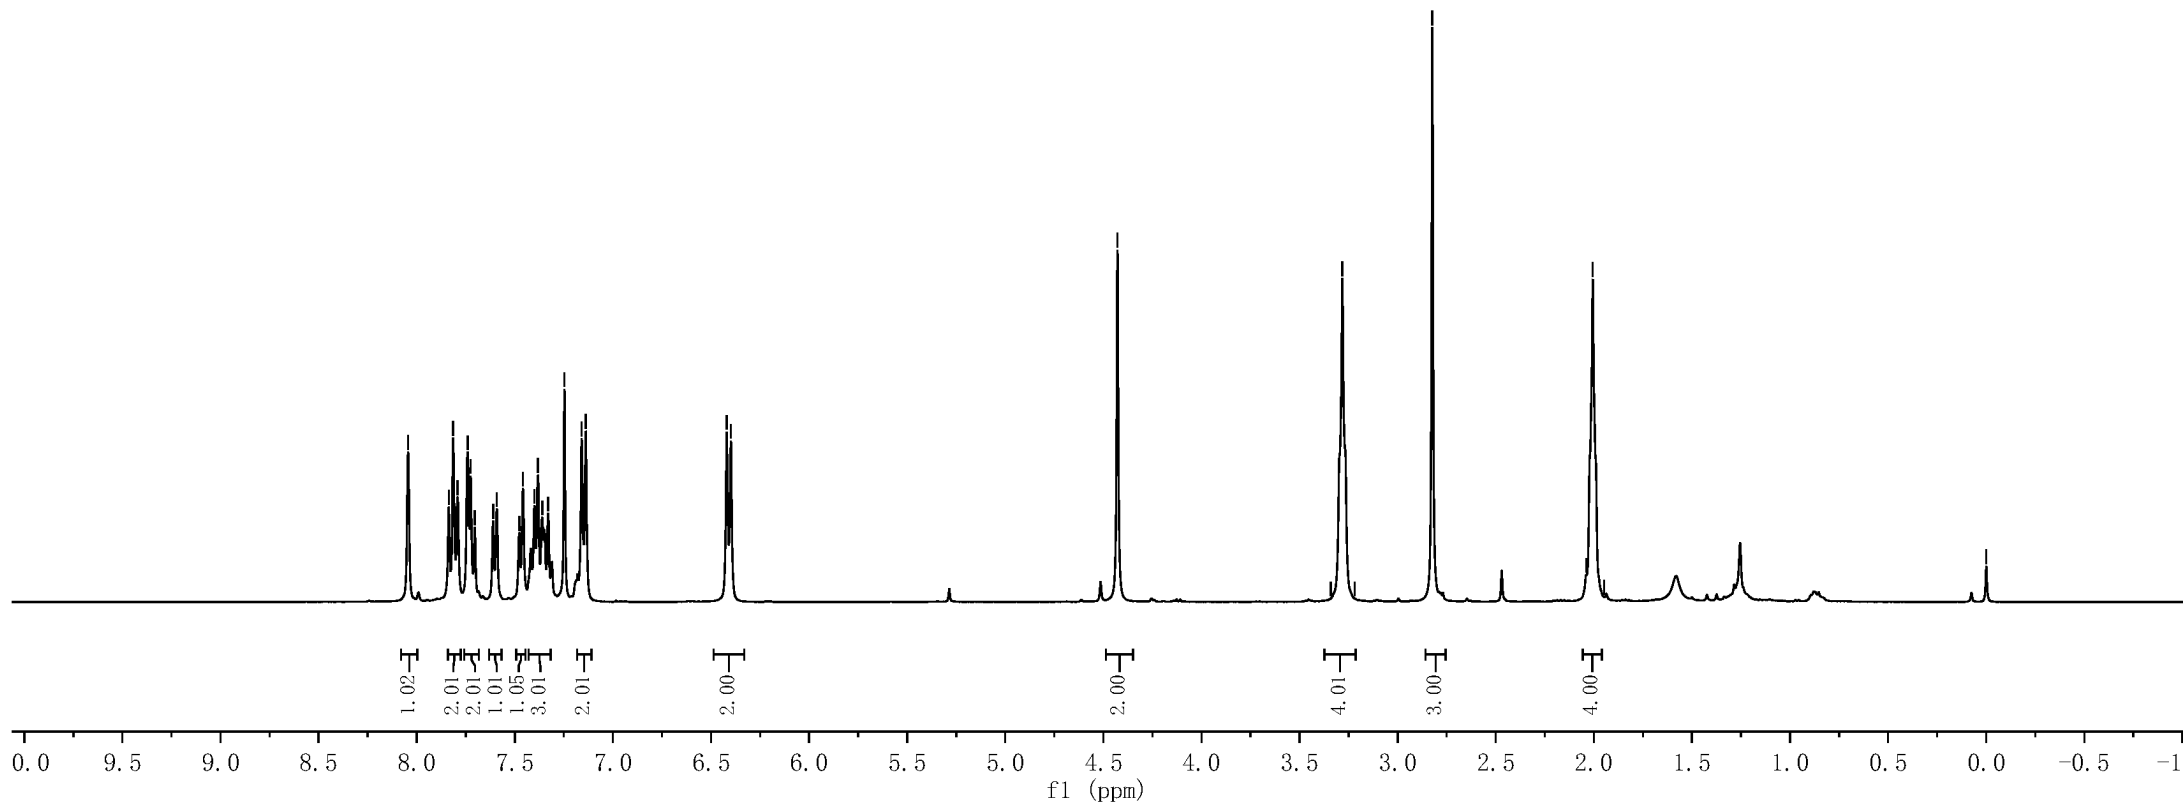

| Parameter                | Value               |
|--------------------------|---------------------|
| 1 Title                  | ZYX-3-229--C        |
| 2 Origin                 | Bruker BioSpin GmbH |
| 3 Solvent                | CDCl3               |
| 4 Temperature            | 295.5               |
| 5 Number of Scans        | 76                  |
| 6 Acquisition Time       | 1.3631              |
| 7 Acquisition Date       | 2022-01-01T15:09:31 |
| 8 Spectrometer Frequency | 100.56              |
| 9 Spectral Width         | 24038.5             |



147.94  
142.94  
138.33  
133.06  
132.98  
129.92  
127.90  
126.63  
126.34  
111.25  
106.98

88.51  
84.60  
78.95  
77.32  
77.00  
76.68  
70.75

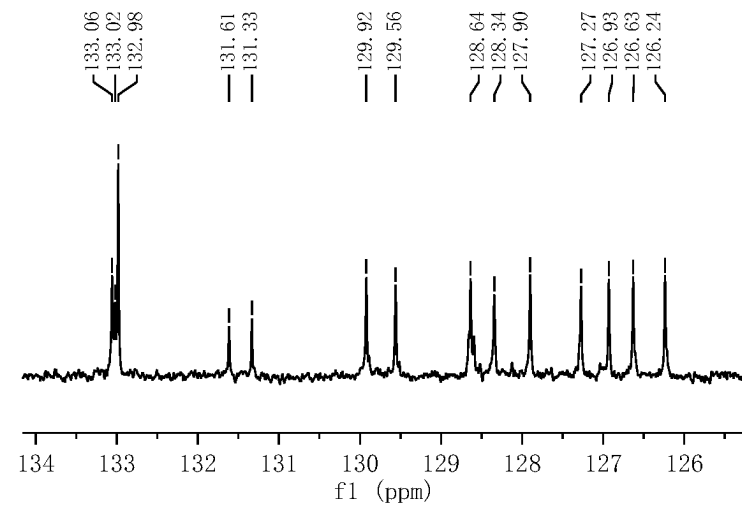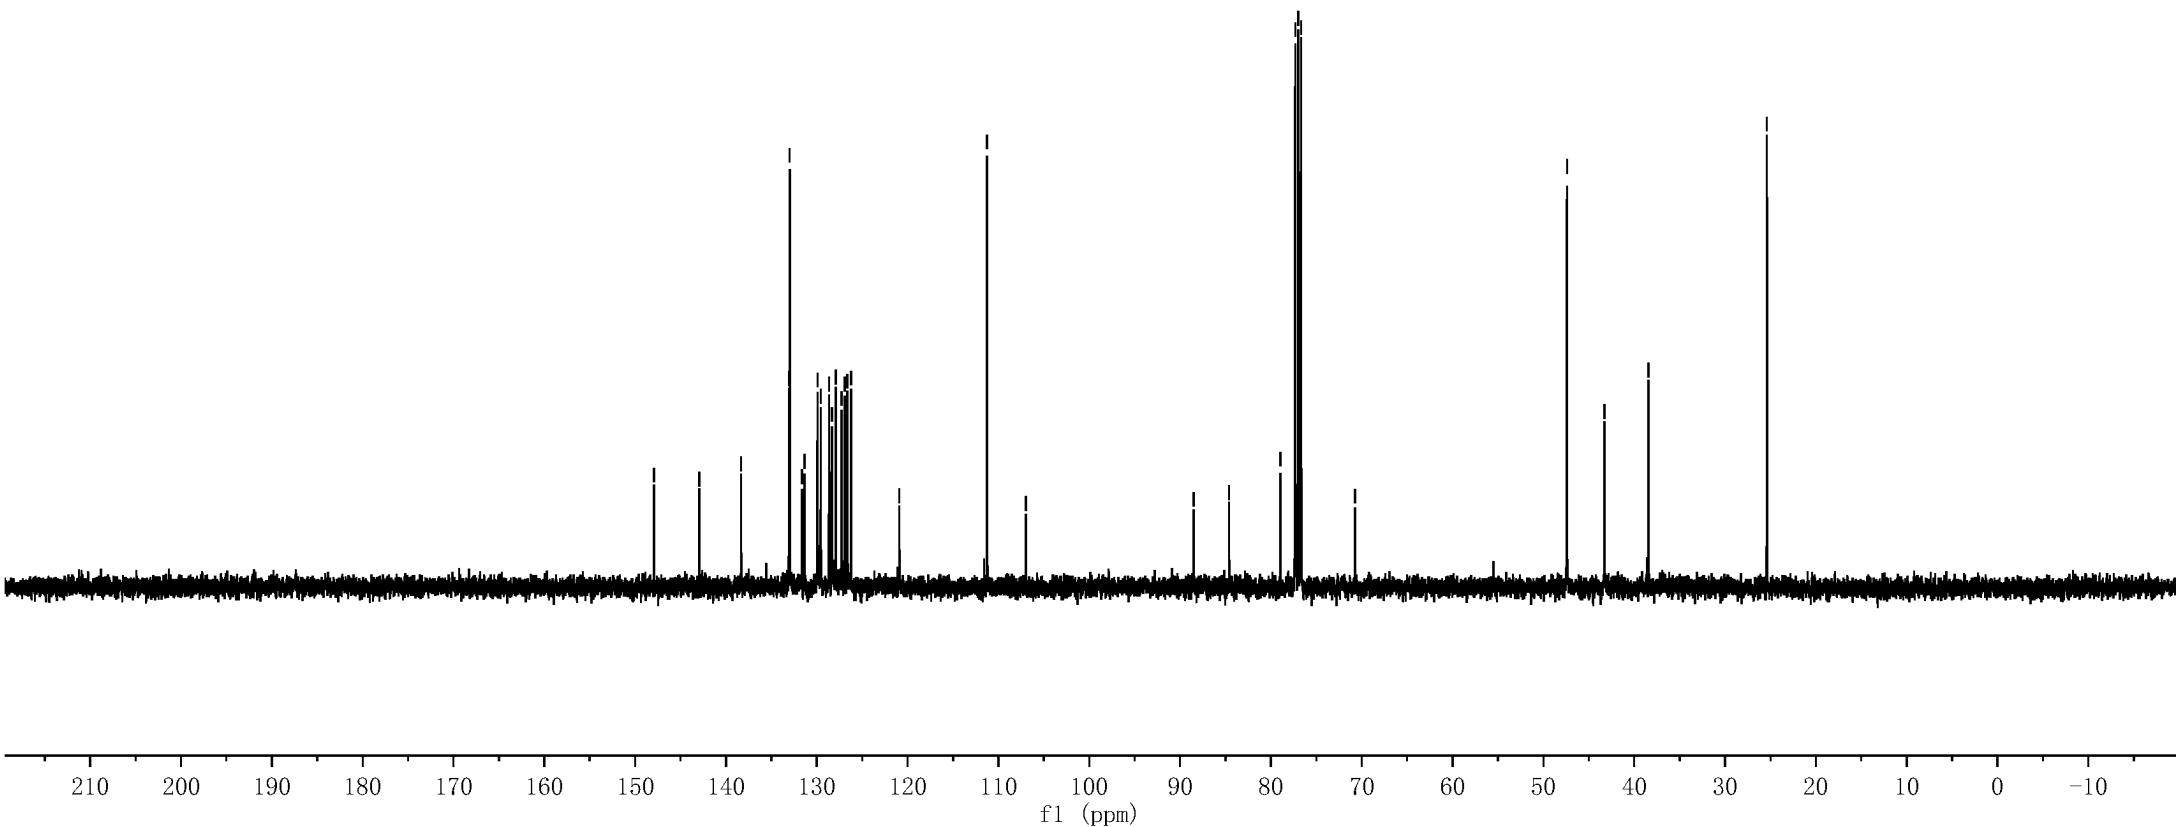

| Parameter                | Value               |
|--------------------------|---------------------|
| 1 Title                  | ZYX-3--219--1-H     |
| 2 Origin                 | Bruker/BioSpin GmbH |
| 3 Solvent                | CDCl <sub>3</sub>   |
| 4 Temperature            | 298.0               |
| 5 Number of Scans        | 7                   |
| 6 Acquisition Time       | 4.0894              |
| 7 Acquisition Date       | 2021-12-29T14:58:06 |
| 8 Spectrometer Frequency | 400.13              |
| 9 Spectral Width         | 8012.8              |

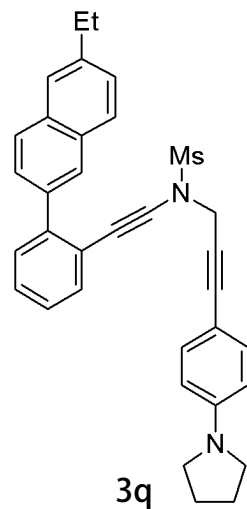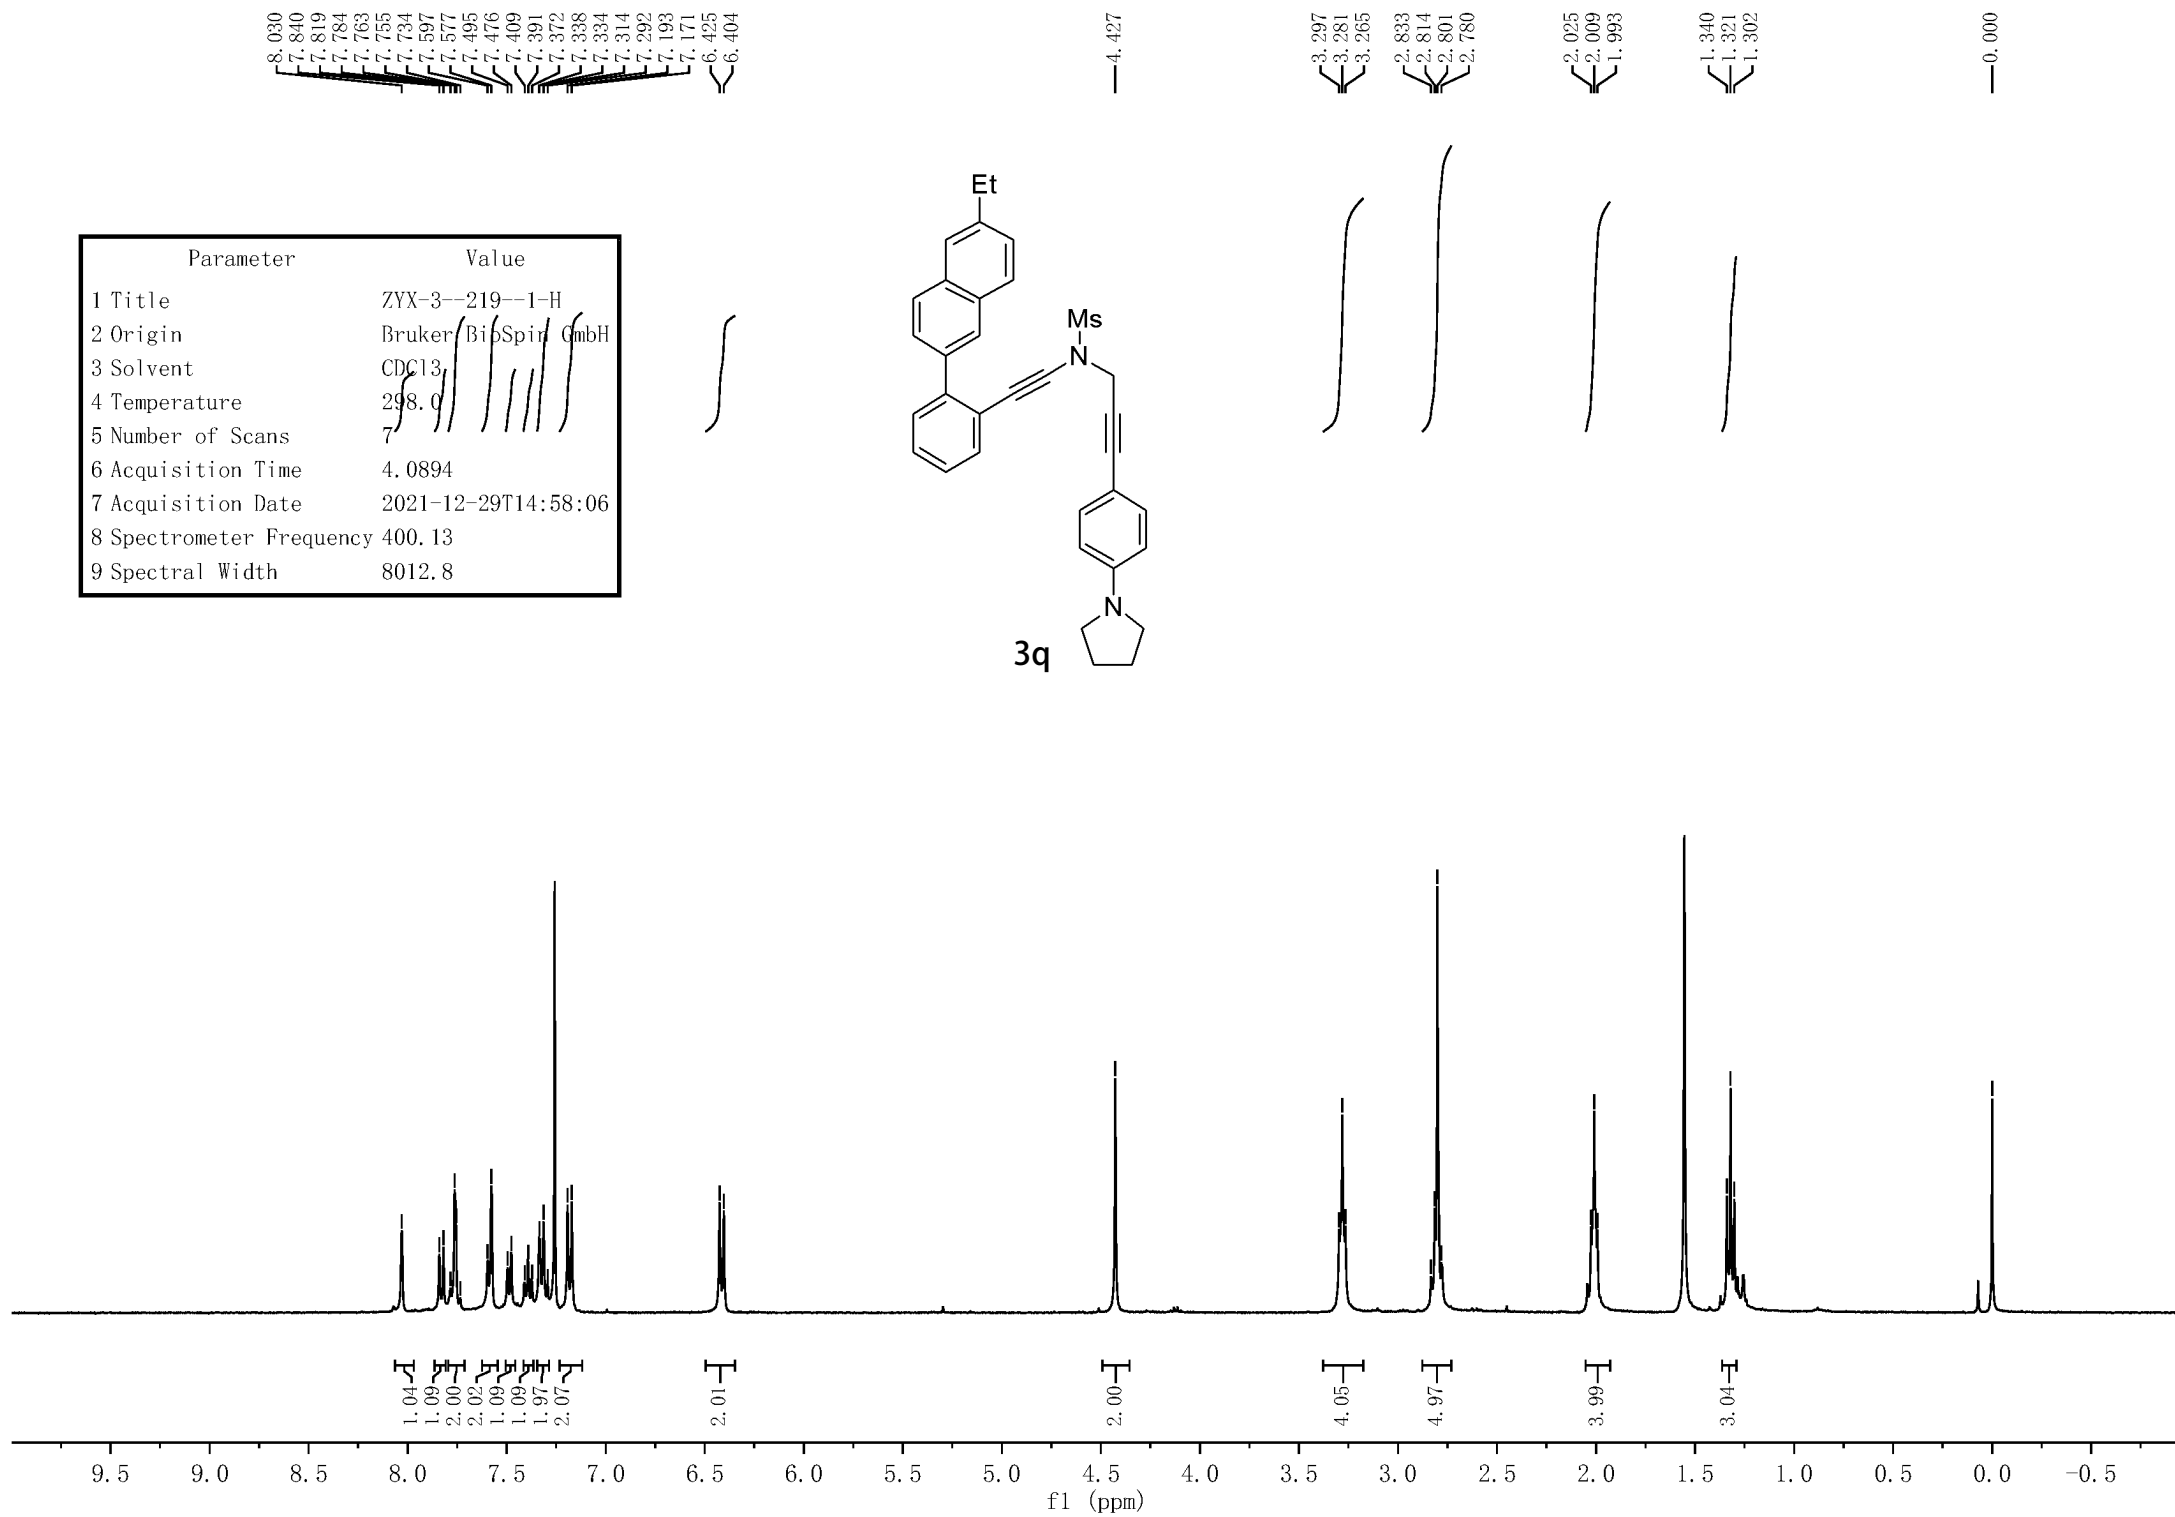

| Parameter                | Value               |
|--------------------------|---------------------|
| 1 Title                  | ZYX-3--219-C        |
| 2 Origin                 | Bruker BioSpin GmbH |
| 3 Solvent                | CDCl3               |
| 4 Temperature            | 300.0               |
| 5 Number of Scans        | 46                  |
| 6 Acquisition Time       | 1.3631              |
| 7 Acquisition Date       | 2021-12-29T14:51:33 |
| 8 Spectrometer Frequency | 100.61              |
| 9 Spectral Width         | 24038.5             |

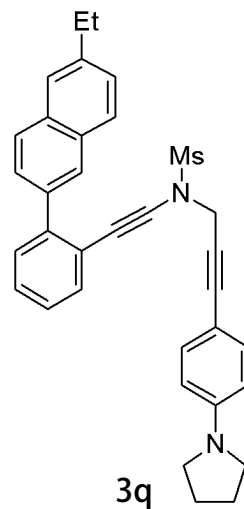

147.86  
143.46  
141.91  
137.14  
132.99  
132.75  
131.58  
129.57  
128.20  
128.15  
127.73  
127.46  
127.25  
126.95  
126.89  
125.11  
120.90  
111.20  
107.09

88.45  
84.44  
79.00  
77.32  
77.00  
76.68  
71.01

47.33  
43.22  
38.31  
28.95  
25.31  
15.37

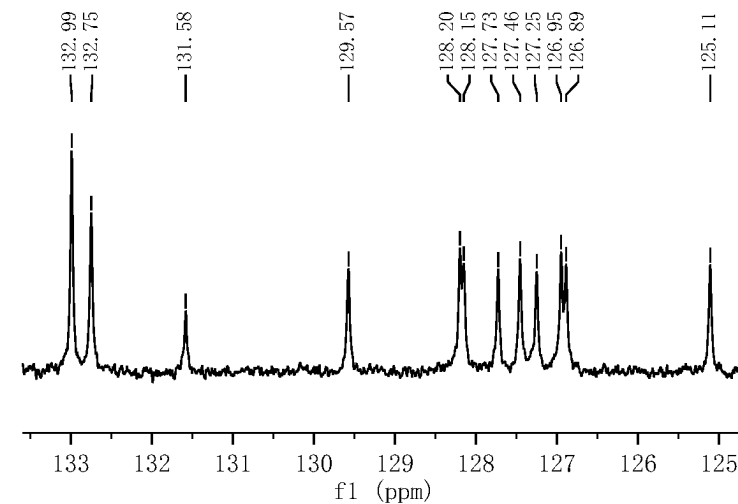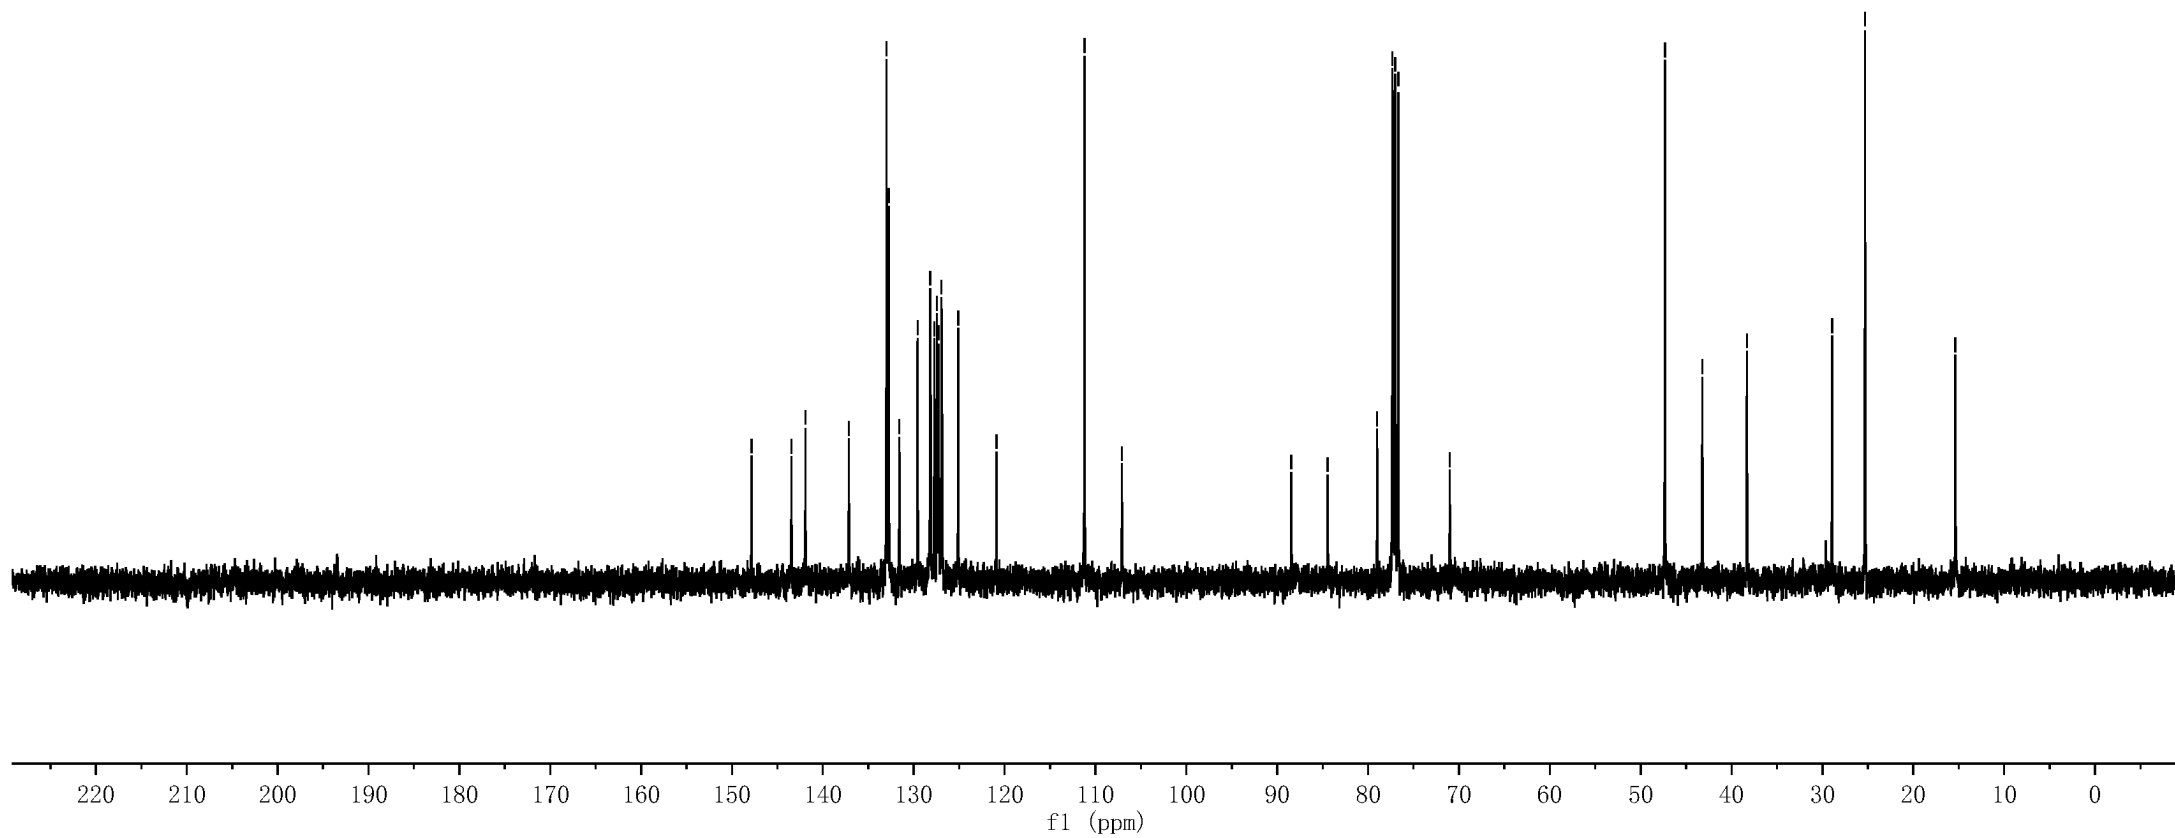

7.997  
7.791  
7.768  
7.750  
7.729  
7.706  
7.583  
7.581  
7.564  
7.562  
7.468  
7.450  
7.380  
7.377  
7.361  
7.358  
7.342  
7.339  
7.299  
7.296  
7.280  
7.277  
7.262  
7.259  
7.208  
7.171  
7.149  
7.120  
7.098  
7.076  
7.070  
6.386  
6.364

| Parameter                | Value               |
|--------------------------|---------------------|
| 1 Title                  | ZYX-3-188-H         |
| 2 Origin                 | Bruker BioSpin GmbH |
| 3 Solvent                | CDCl3               |
| 4 Temperature            | 298.0               |
| 5 Number of Scans        | 7                   |
| 6 Acquisition Time       | 4.0894              |
| 7 Acquisition Date       | 2021-12-15T16:45:2  |
| 8 Spectrometer Frequency | 400.13              |
| 9 Spectral Width         | 8012.8              |

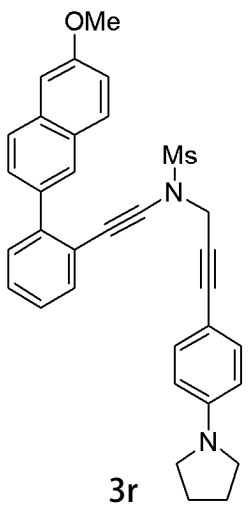

4.416  
3.876  
3.243  
3.227  
3.210  
2.803  
1.974  
1.965  
1.957  
1.950  
1.941  
0.000

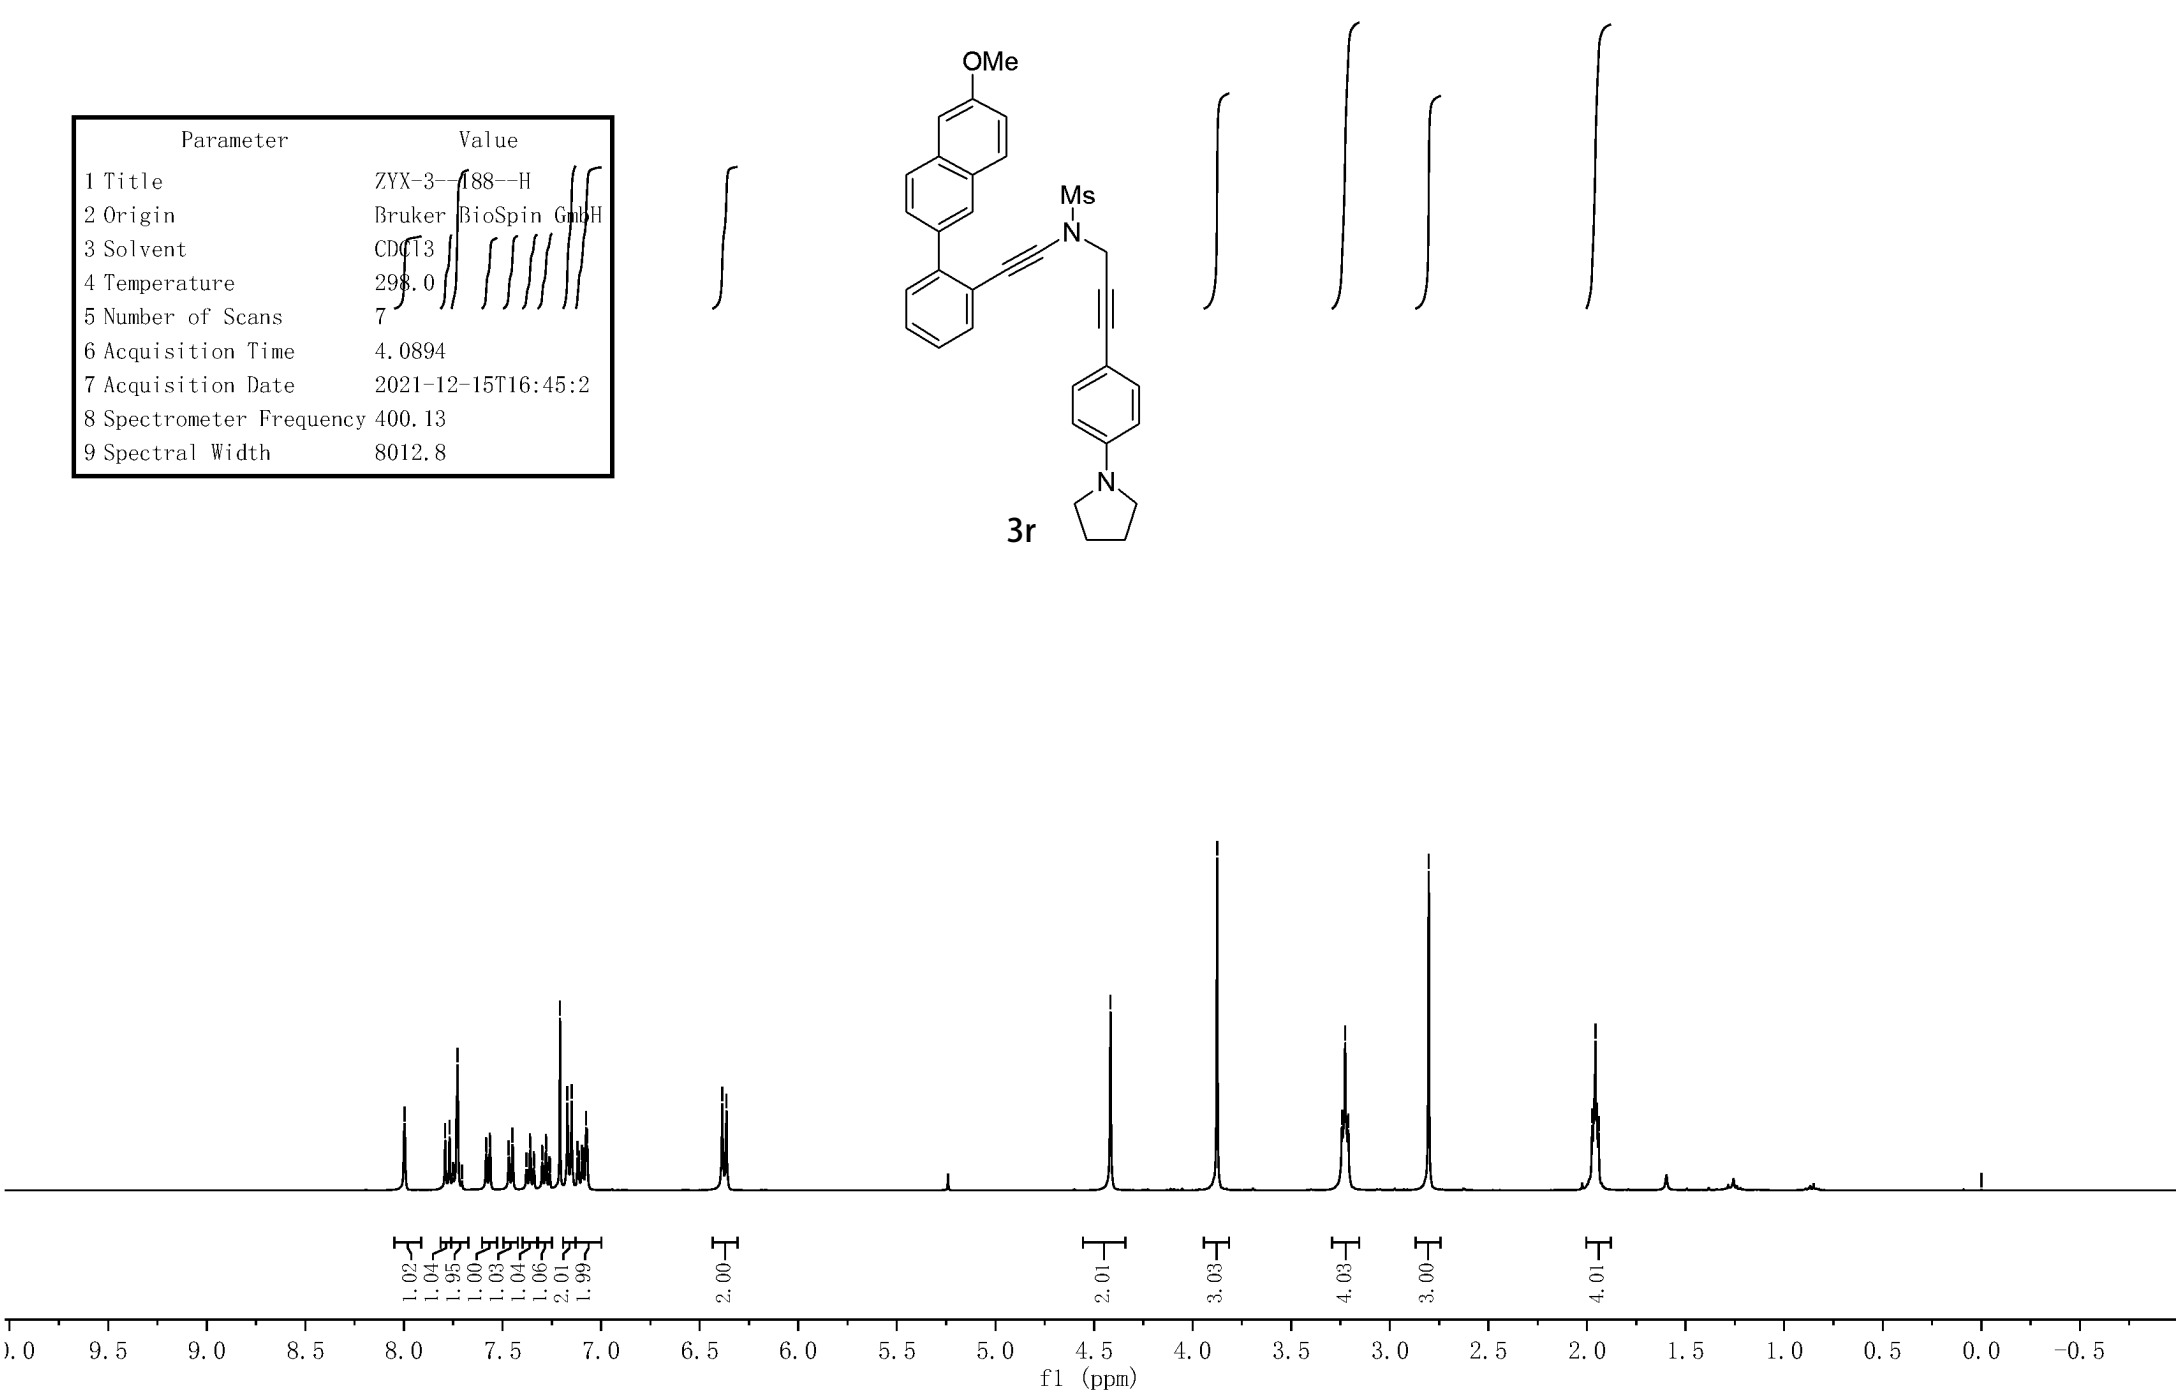

| Parameter                | Value               |
|--------------------------|---------------------|
| 1 Title                  | ZYX-3--188--C       |
| 2 Origin                 | Bruker BioSpin GmbH |
| 3 Solvent                | CDCl3               |
| 4 Temperature            | 300.0               |
| 5 Number of Scans        | 38                  |
| 6 Acquisition Time       | 1.3631              |
| 7 Acquisition Date       | 2021-12-15T16:46:45 |
| 8 Spectrometer Frequency | 100.61              |
| 9 Spectral Width         | 24038.5             |

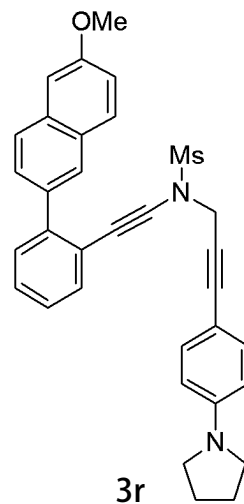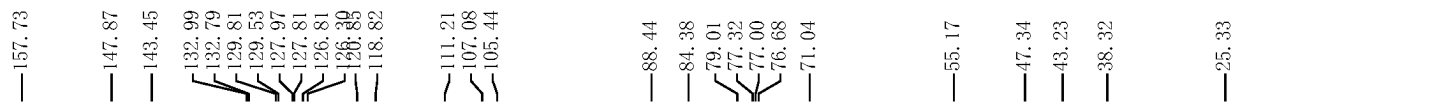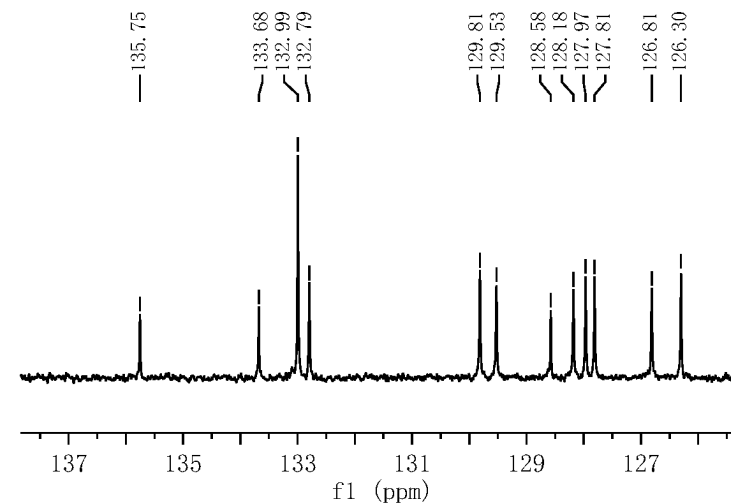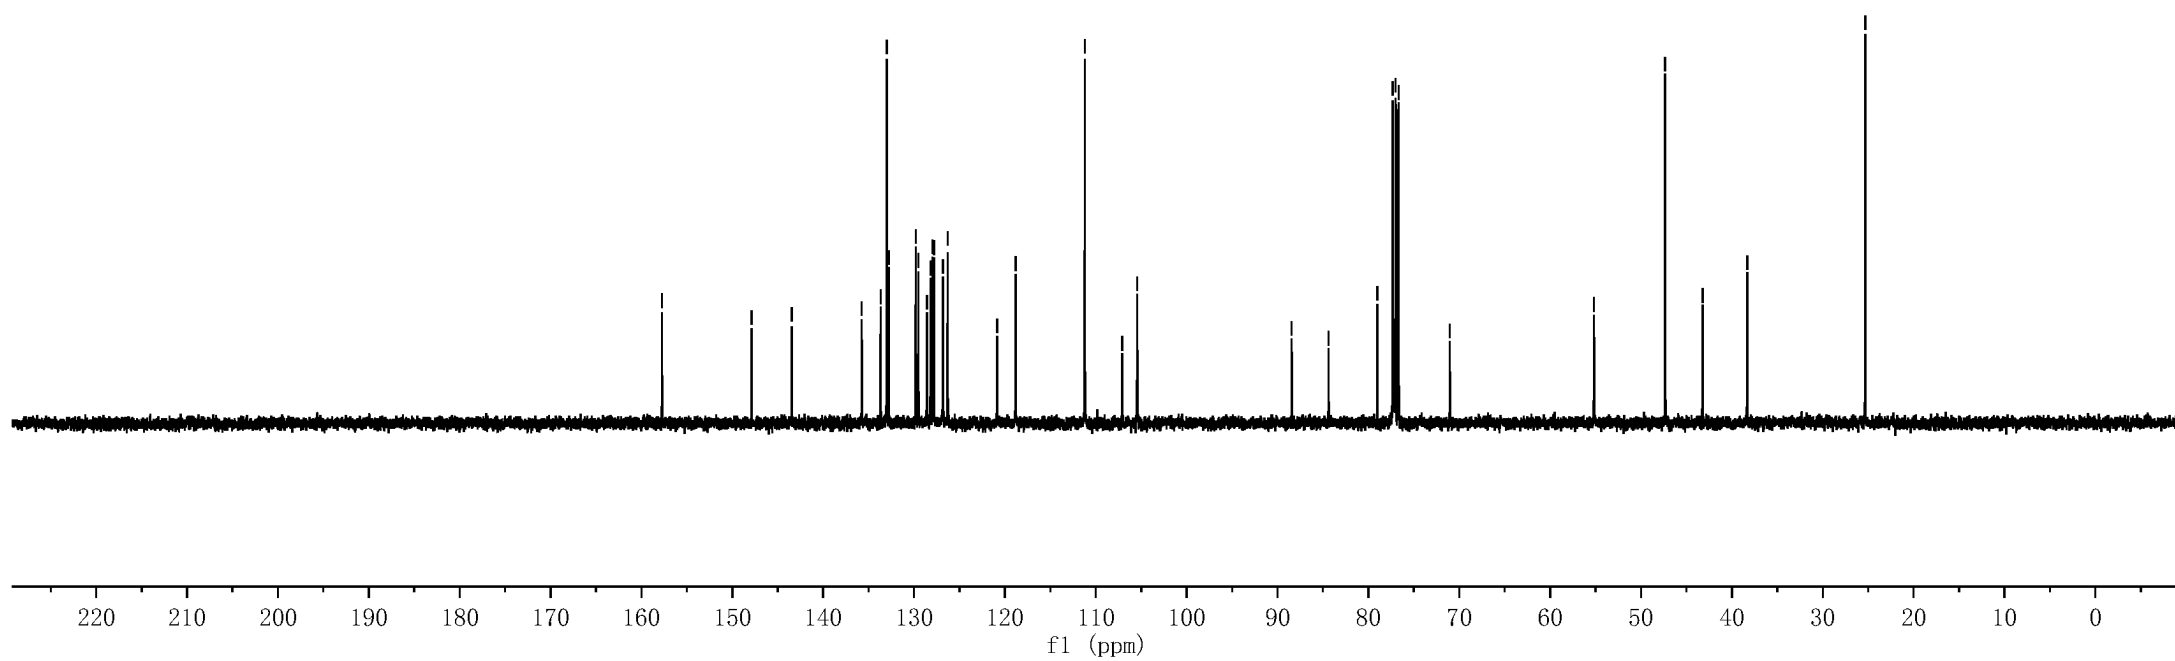

| Parameter                | Value               |
|--------------------------|---------------------|
| 1 Title                  | ZYX-438--H          |
| 2 Origin                 | Bruker BioSpin GmbH |
| 3 Solvent                | CDCl <sub>3</sub>   |
| 4 Temperature            | 296.9               |
| 5 Number of Scans        | 10                  |
| 6 Acquisition Time       | 3.1719              |
| 7 Acquisition Date       | 2022-01-19T10:20:32 |
| 8 Spectrometer Frequency | 500.17              |
| 9 Spectral Width         | 10330.6             |

8.056  
7.929  
7.816  
7.799  
7.790  
7.773  
7.658  
7.641  
7.600  
7.585  
7.514  
7.497  
7.462  
7.447  
7.408  
7.393  
7.379  
7.346  
7.330  
7.316  
7.114  
7.097  
6.392  
6.375

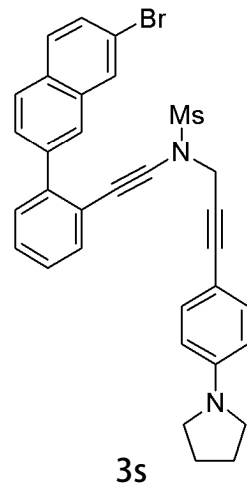

4.419

3.327  
3.265  
3.203

2.850

2.005  
1.992  
1.980

0.000

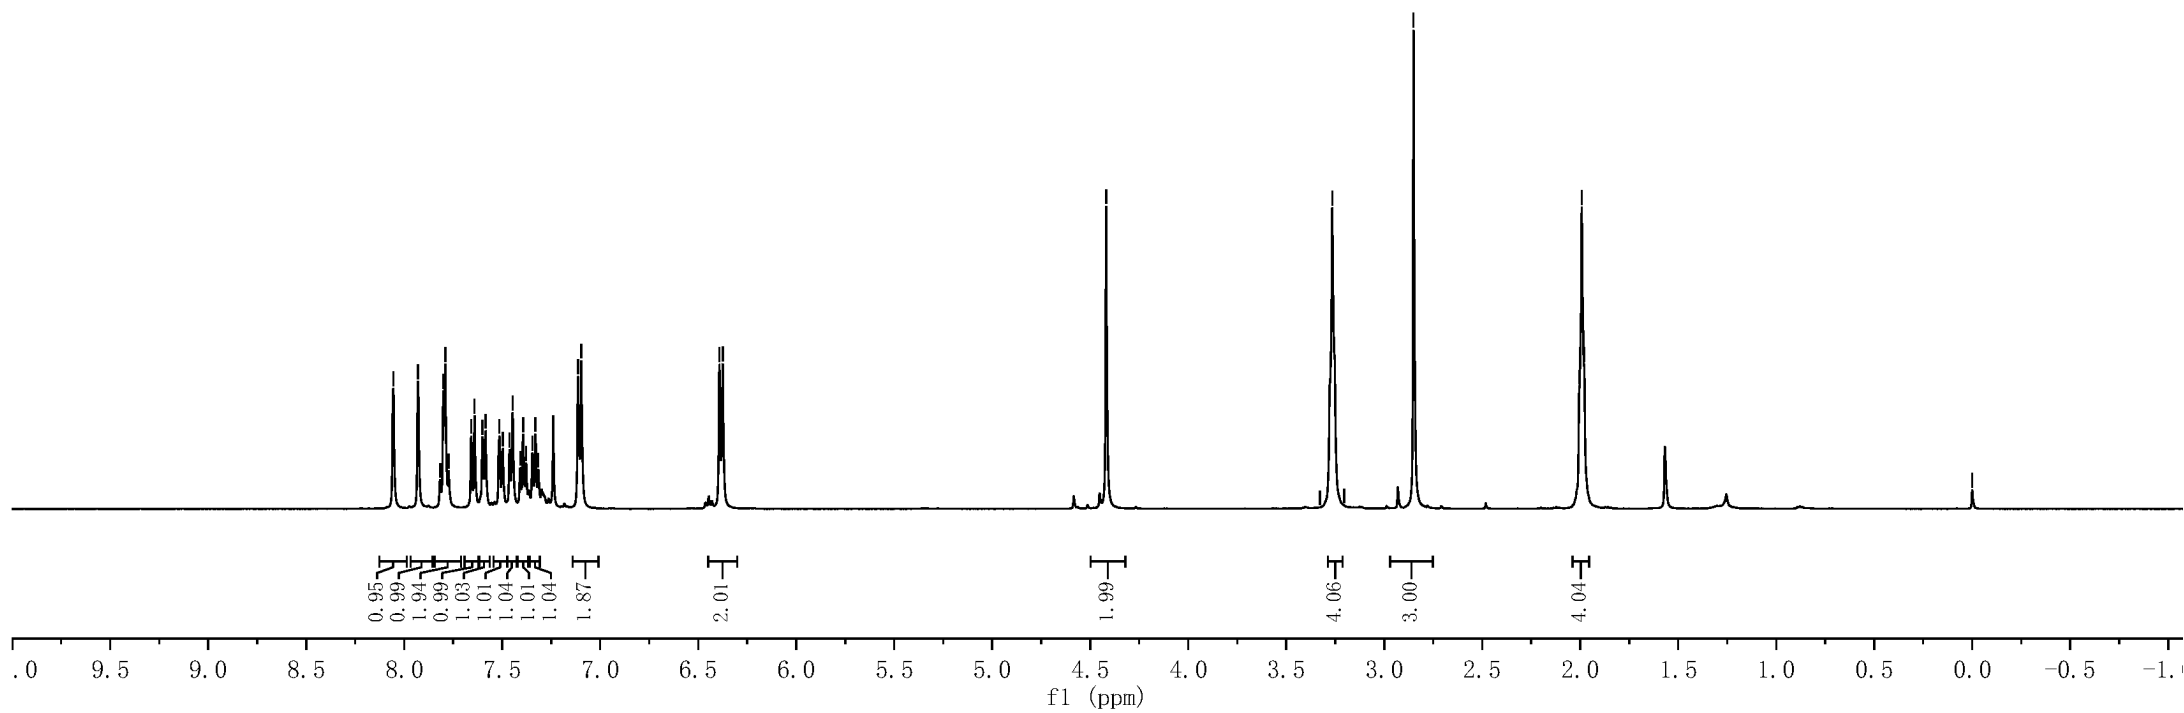



| Parameter                | Value               |
|--------------------------|---------------------|
| 1 Title                  | zyx-4-38-cc         |
| 2 Origin                 | Bruker BioSpin GmbH |
| 3 Solvent                | CDCl3               |
| 4 Temperature            | 297.4               |
| 5 Number of Scans        | 50                  |
| 6 Acquisition Time       | 1.1010              |
| 7 Acquisition Date       | 2022-01-18T21:51:09 |
| 8 Spectrometer Frequency | 125.77              |
| 9 Spectral Width         | 29761.9             |



147.91  
142.80  
139.23  
132.95  
130.18  
129.33  
129.23  
127.36  
121.83  
119.99  
111.24  
106.96

88.52  
84.72  
78.85  
77.25  
77.00  
76.75  
70.75

47.41  
43.24  
38.48  
25.38

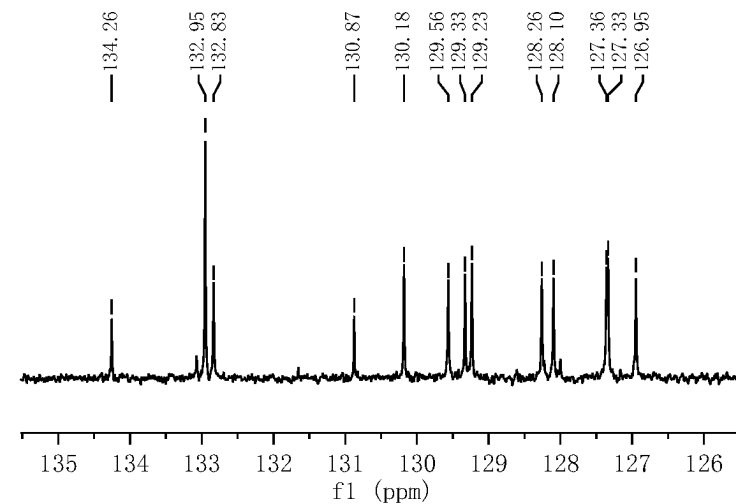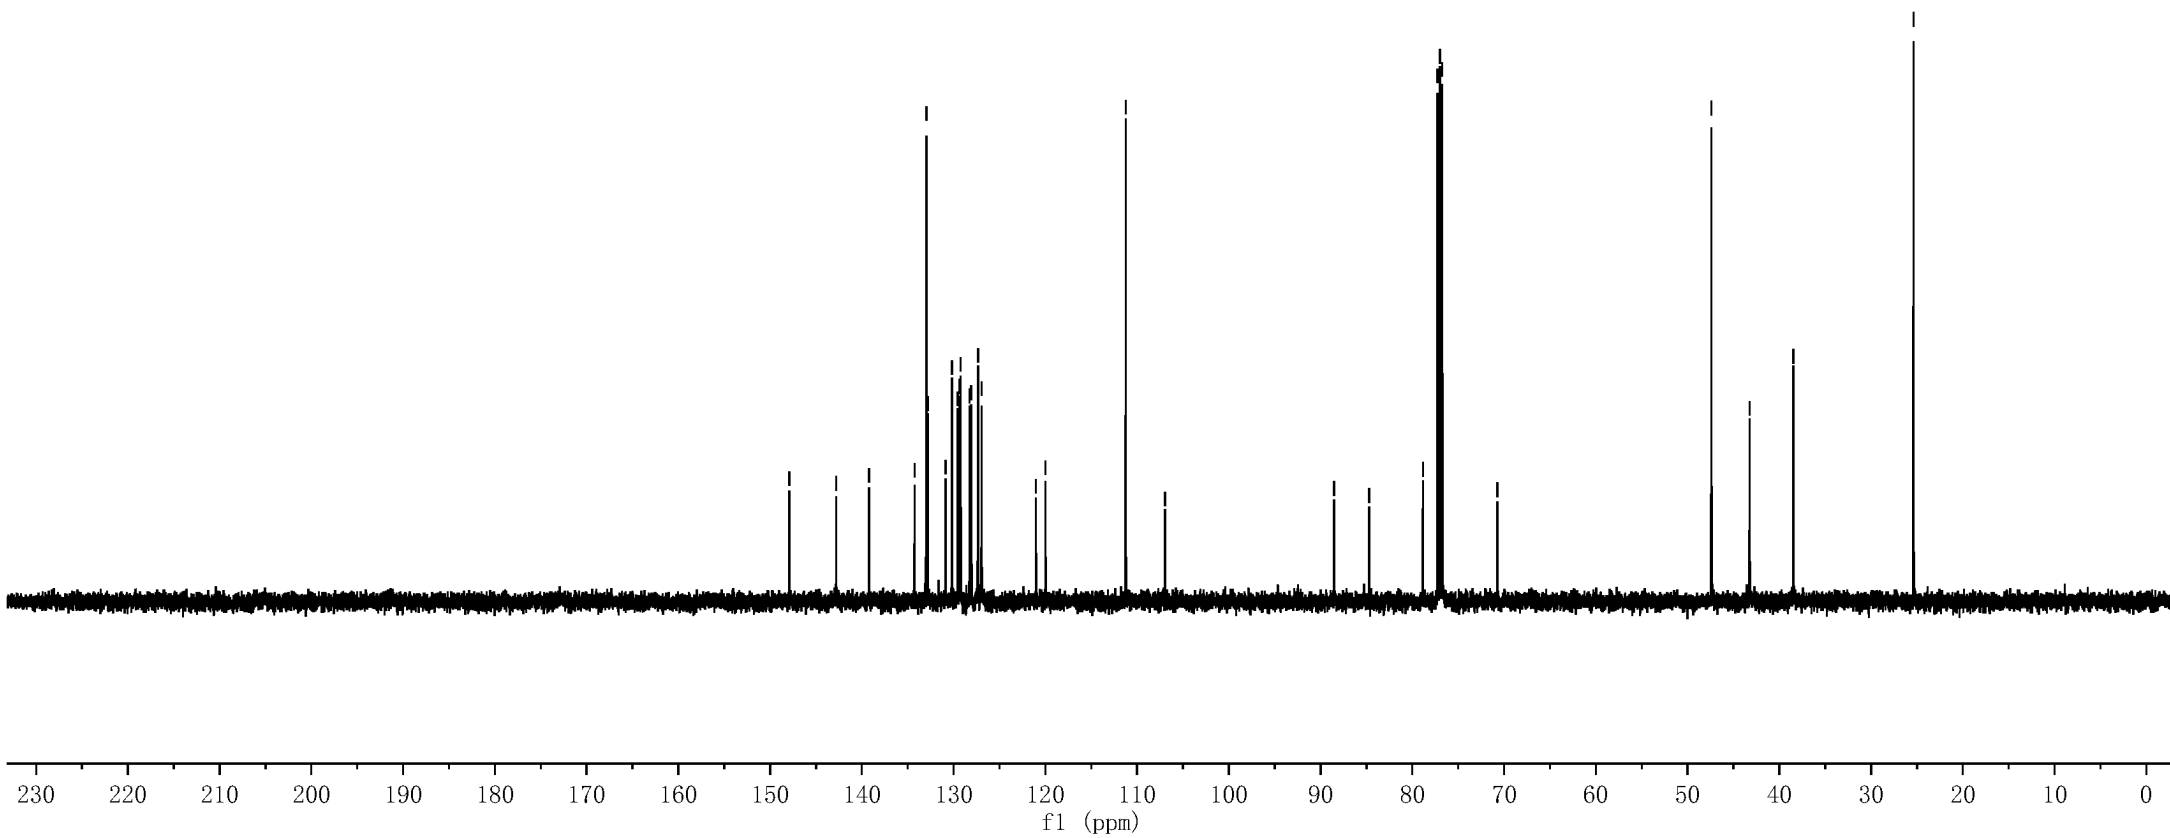

| Parameter                | Value               |
|--------------------------|---------------------|
| 1 Title                  | zyx-4-16-h          |
| 2 Origin                 | Bruker BioSpin GmbH |
| 3 Solvent                | CDCl <sub>3</sub>   |
| 4 Temperature            | 298.0               |
| 5 Number of Scans        | 10                  |
| 6 Acquisition Time       | 4.0894              |
| 7 Acquisition Date       | 2022-01-11T16:31:24 |
| 8 Spectrometer Frequency | 400.13              |
| 9 Spectral Width         | 8012.8              |

8.018  
7.759  
7.738  
7.697  
7.675  
7.612  
7.592  
7.588  
7.573  
7.476  
7.256  
7.250  
7.188  
6.462  
6.380

4.420

3.853

3.269

3.253

3.237

2.811

2.001

1.992

1.985

1.977

1.968

0.000

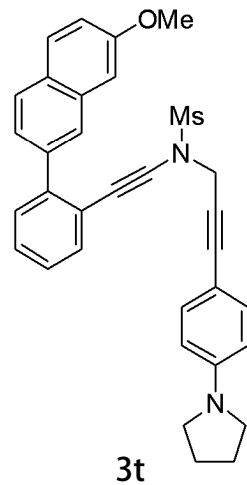

1.00  
1.02  
1.00  
2.01  
1.02  
1.03  
1.03  
1.03  
2.01  
1.03

2.01

2.02

3.01

4.01

3.00

4.03

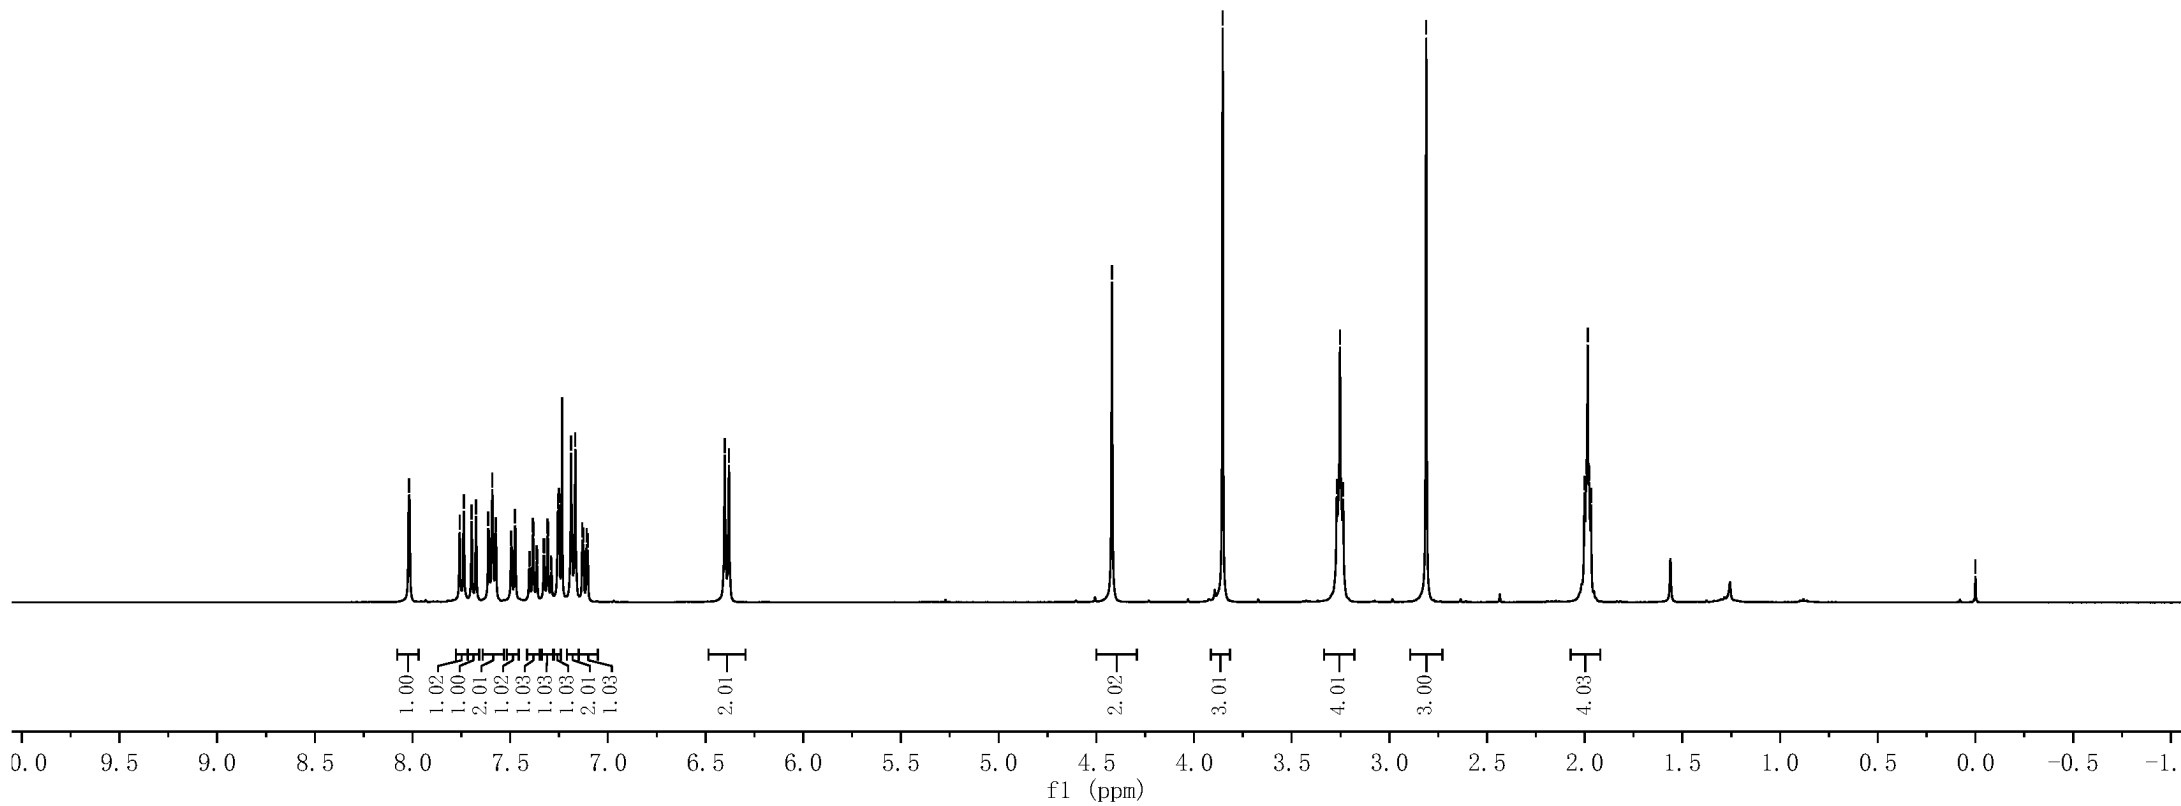

| Parameter                | Value               |
|--------------------------|---------------------|
| 1 Title                  | ZYX-4-16-C          |
| 2 Origin                 | Bruker BioSpin GmbH |
| 3 Solvent                | CDCl3               |
| 4 Temperature            | 300.0               |
| 5 Number of Scans        | 41                  |
| 6 Acquisition Time       | 1.3631              |
| 7 Acquisition Date       | 2022-01-11T15:36:00 |
| 8 Spectrometer Frequency | 100.61              |
| 9 Spectral Width         | 24038.5             |

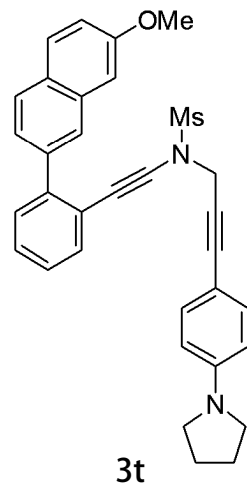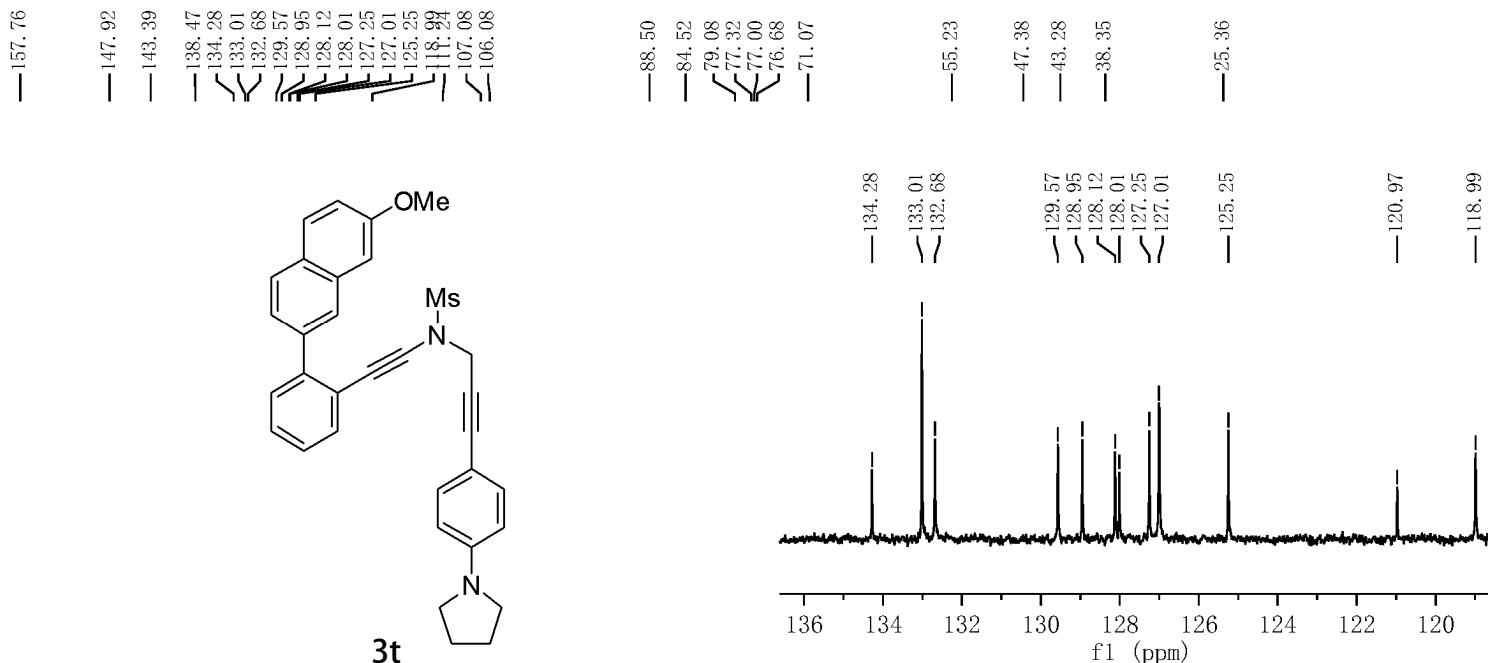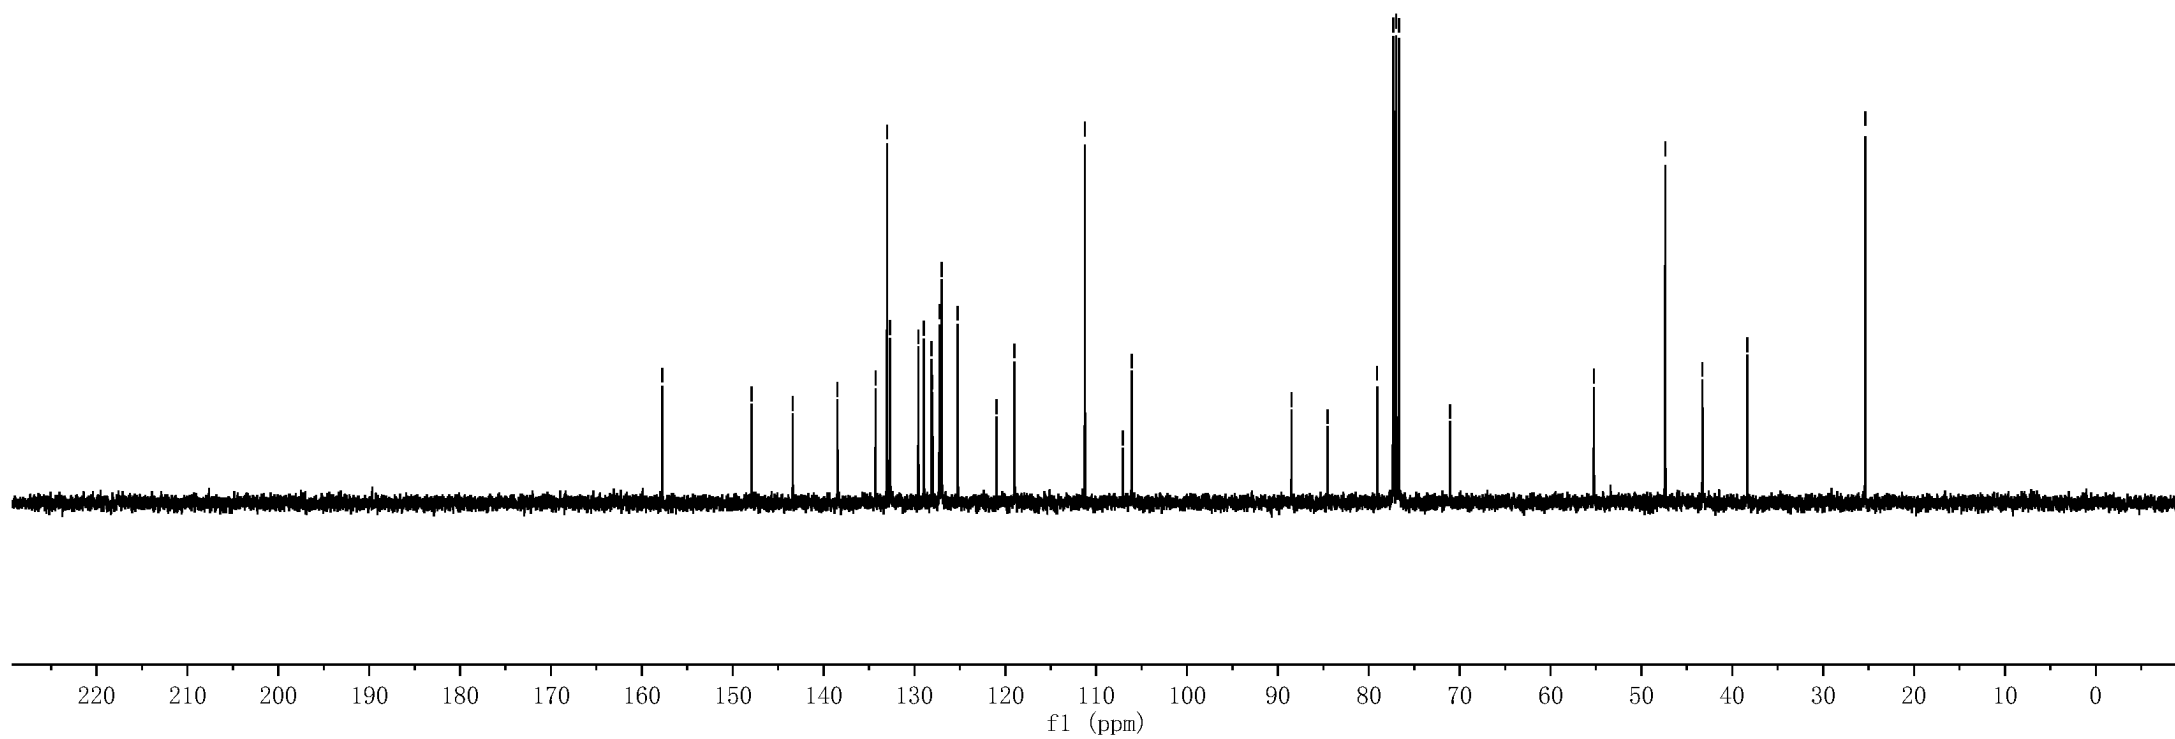

| Parameter                | Value               |
|--------------------------|---------------------|
| 1 Title                  | zyx-4-35-h          |
| 2 Origin                 | Bruker BioSpin GmbH |
| 3 Solvent                | CDCl3               |
| 4 Temperature            | 295.6               |
| 5 Number of Scans        | 12                  |
| 6 Acquisition Time       | 3.9846              |
| 7 Acquisition Date       | 2022-01-18T11:01:31 |
| 8 Spectrometer Frequency | 399.93              |
| 9 Spectral Width         | 8223.7              |

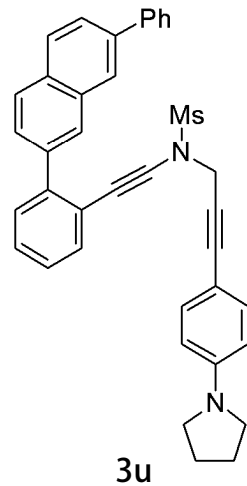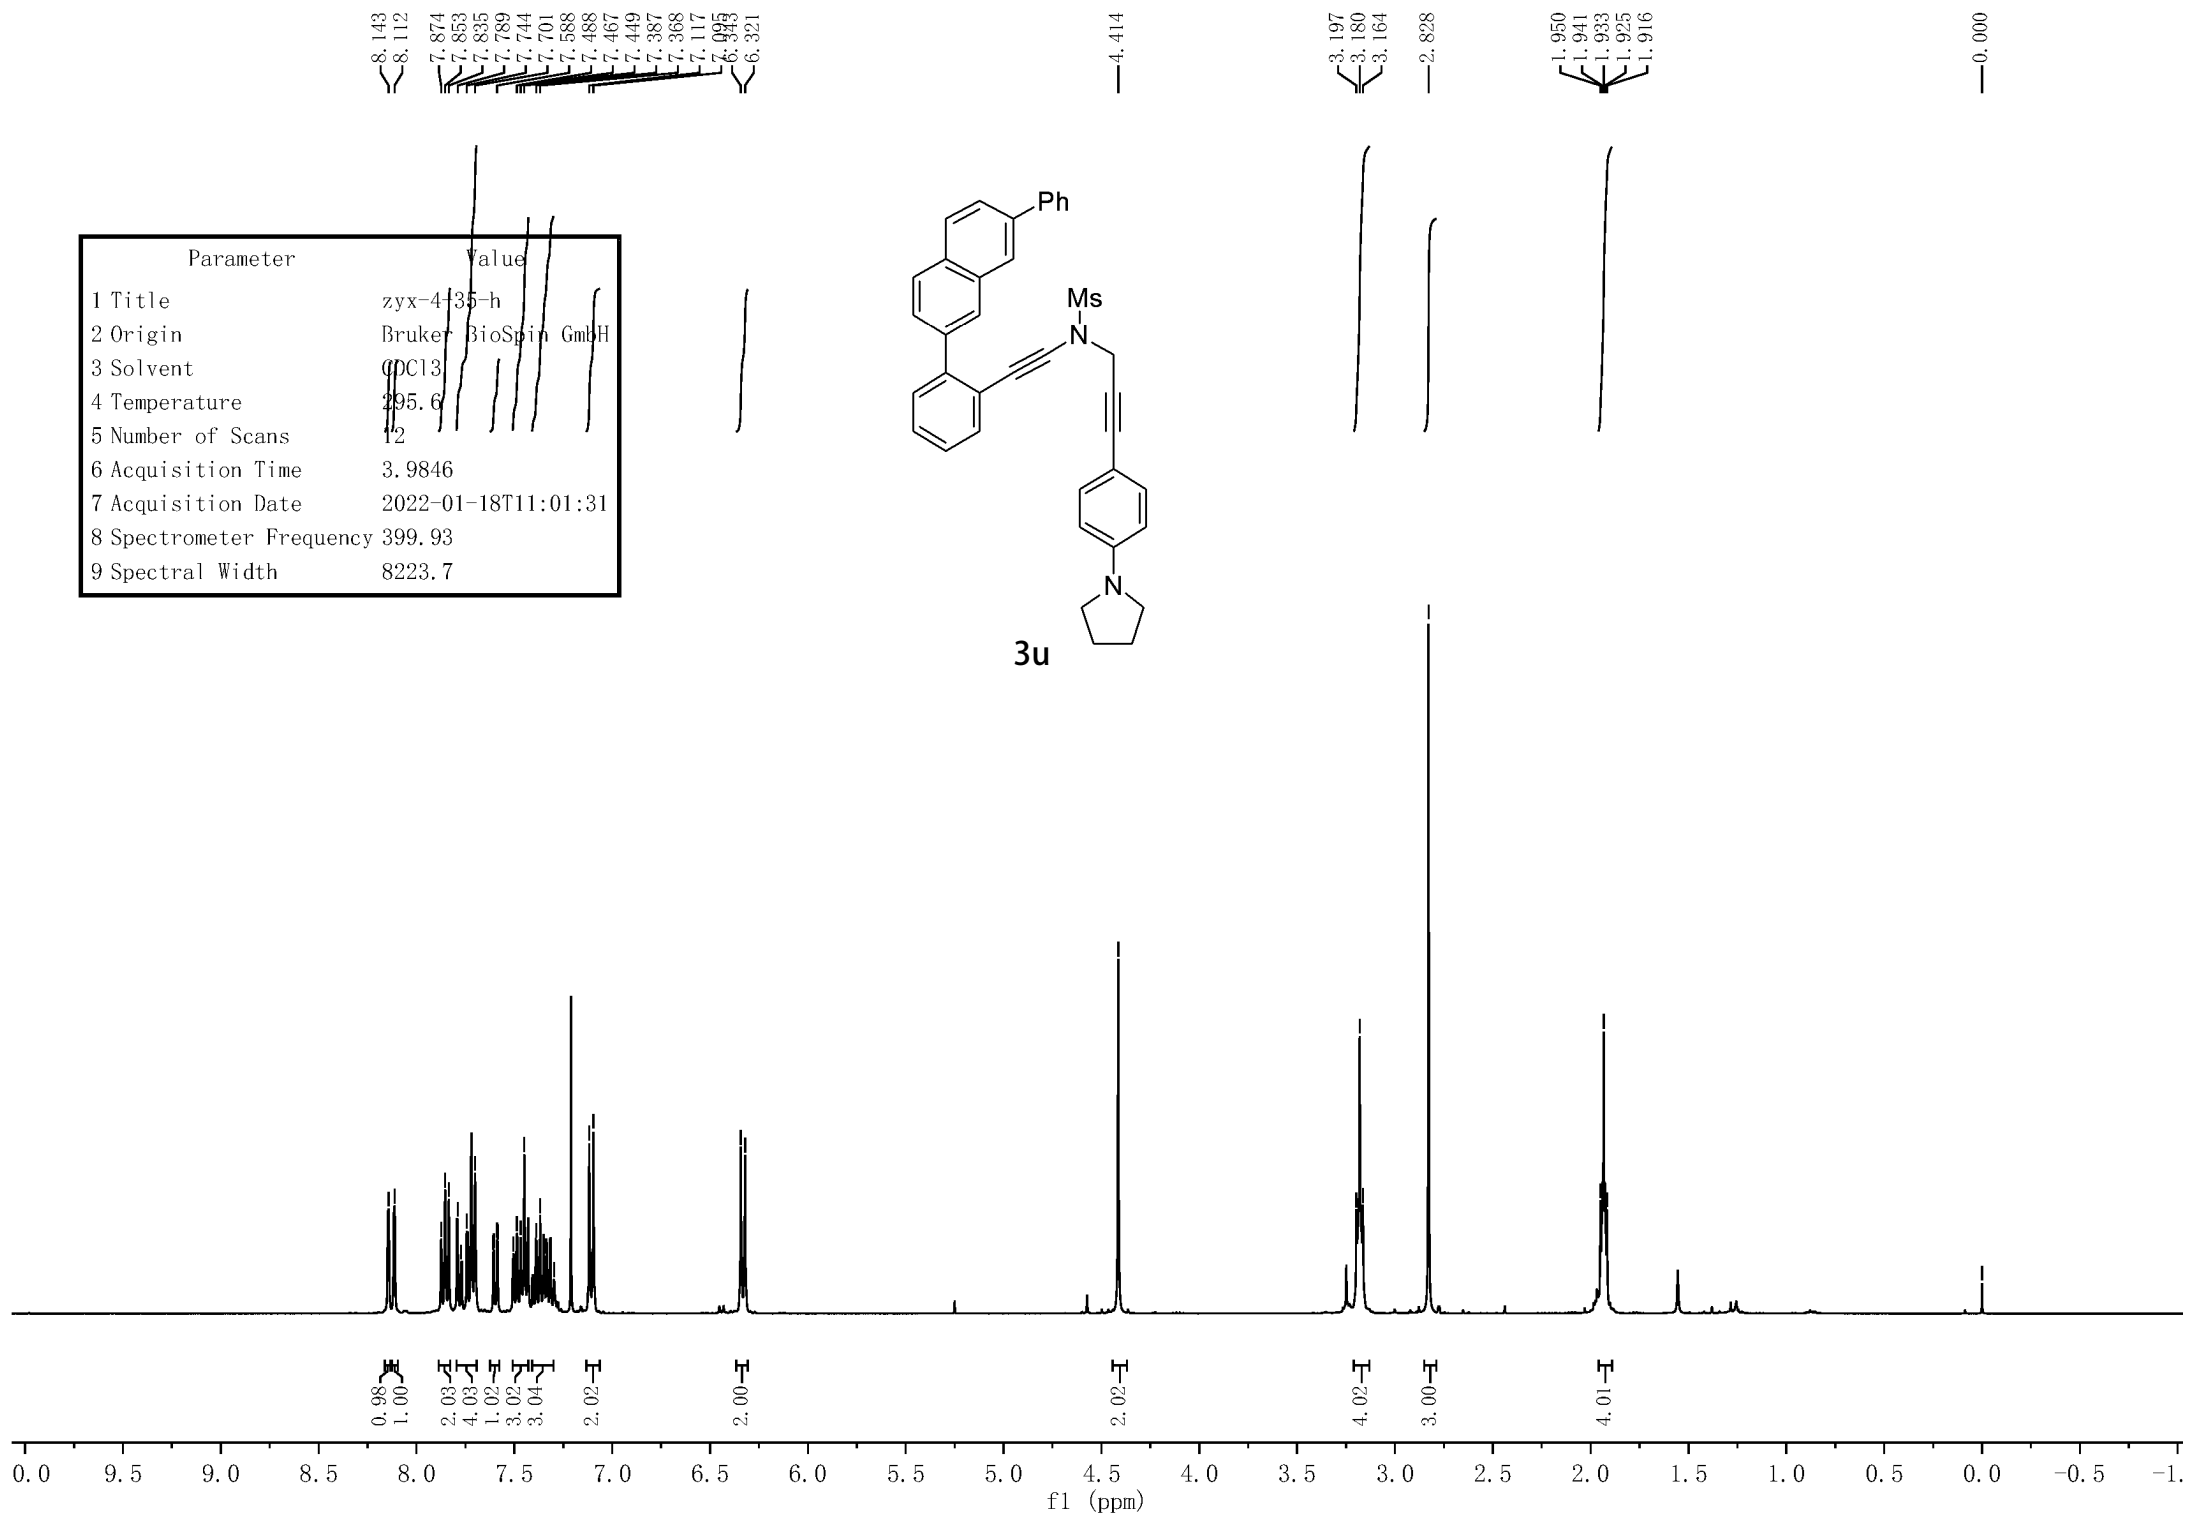

| Parameter                | Value               |
|--------------------------|---------------------|
| 1 Title                  | zyx-4-35-c          |
| 2 Origin                 | Bruker BioSpin GmbH |
| 3 Solvent                | CDCl3               |
| 4 Temperature            | 295.8               |
| 5 Number of Scans        | 48                  |
| 6 Acquisition Time       | 1.3631              |
| 7 Acquisition Date       | 2022-01-18T11:04:44 |
| 8 Spectrometer Frequency | 100.56              |
| 9 Spectral Width         | 24038.5             |

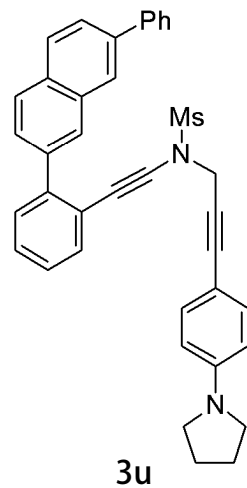

147.86  
143.27  
140.80  
138.57  
138.54  
132.97  
128.83  
128.29  
128.08  
127.31  
127.26  
127.15  
127.14  
126.05  
125.67  
107.01

88.52  
84.61  
78.95  
77.32  
77.00  
76.68  
70.94

47.33  
43.28  
38.43

25.33

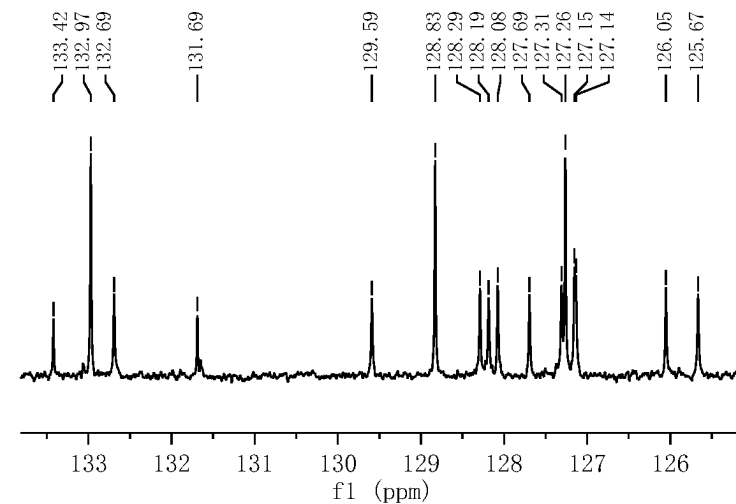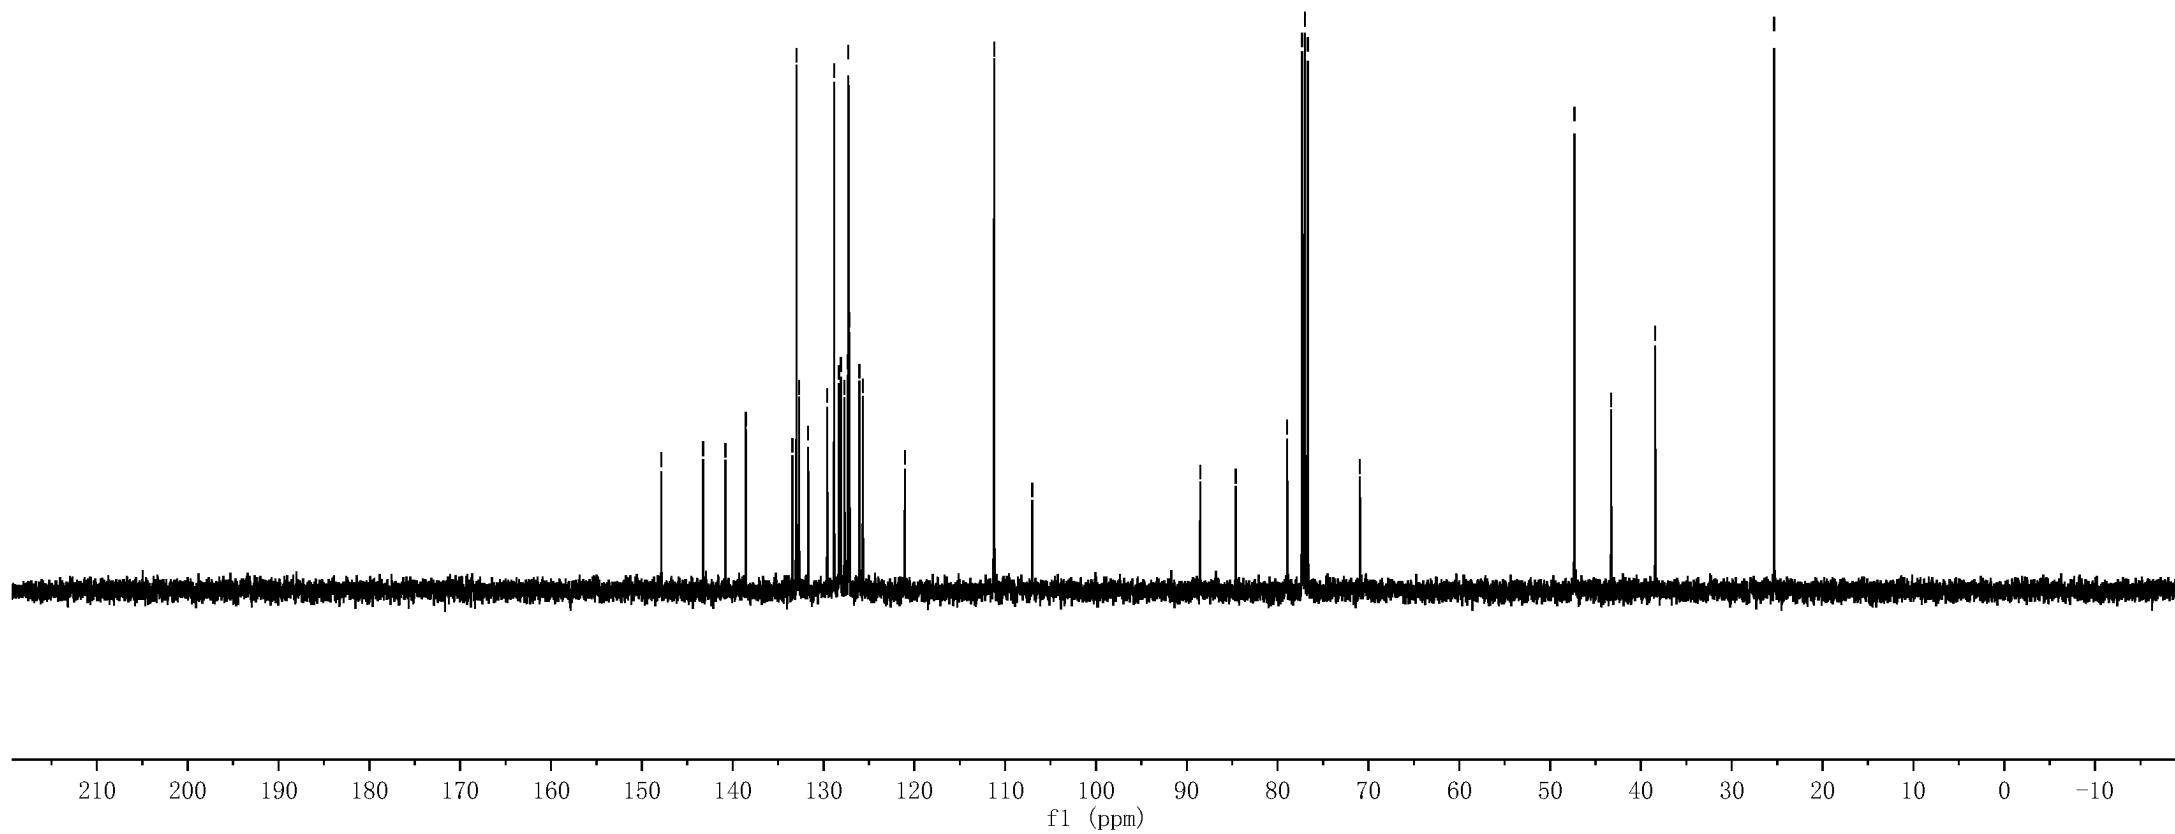

| Parameter                | Value               |
|--------------------------|---------------------|
| 1 Title                  | zyx-4-79-h-2        |
| 2 Origin                 | Bruker BioSpin GmbH |
| 3 Solvent                | CDCl3               |
| 4 Temperature            | 298.0               |
| 5 Number of Scans        | 8                   |
| 6 Acquisition Time       | 4.0894              |
| 7 Acquisition Date       | 2022-02-18T16:33:08 |
| 8 Spectrometer Frequency | 400.13              |
| 9 Spectral Width         | 8012.8              |

8.078  
7.819  
7.814  
7.663  
7.644  
7.606  
7.587  
7.475  
7.400  
7.351  
7.316  
7.228  
7.146  
6.999  
6.378

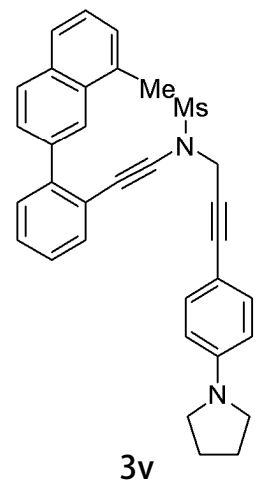

4.395

3.277  
3.262  
3.246  
2.760  
2.708  
2.007  
1.991  
1.975

0.000

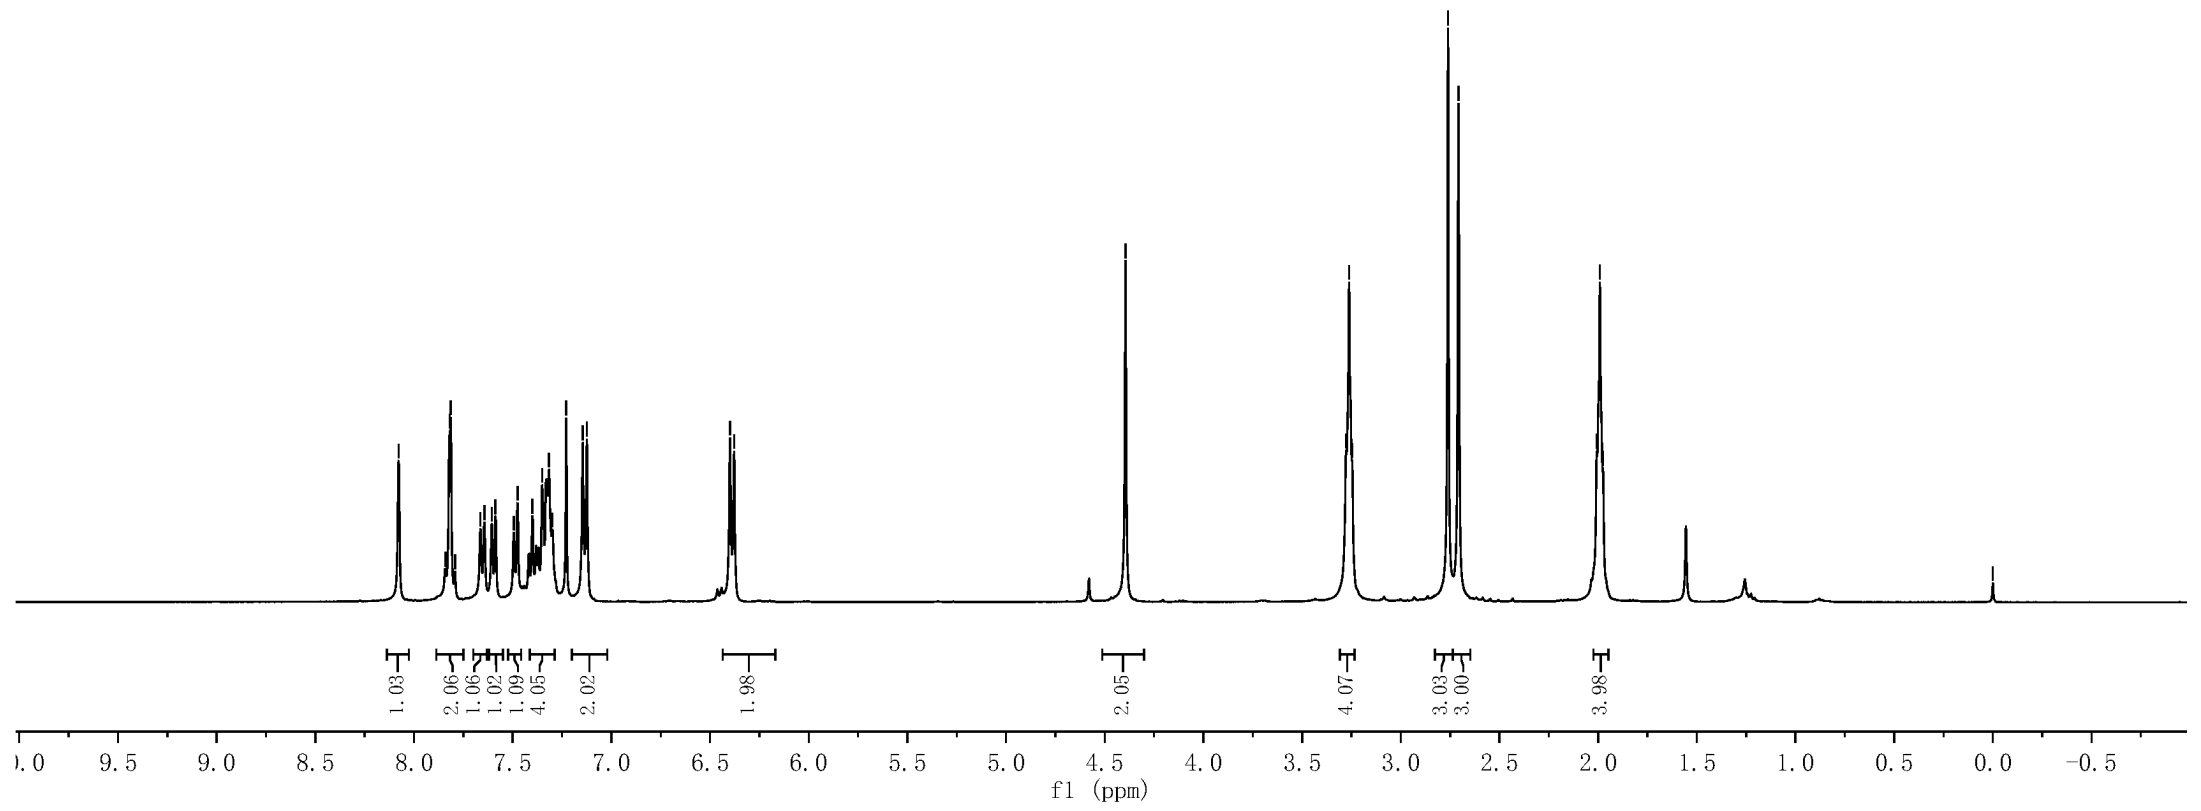

| Parameter                | Value               |
|--------------------------|---------------------|
| 1 Title                  | zyx-4-79-c-2        |
| 2 Origin                 | Bruker BioSpin GmbH |
| 3 Solvent                | CDCl3               |
| 4 Temperature            | 300.0               |
| 5 Number of Scans        | 57                  |
| 6 Acquisition Time       | 1.3631              |
| 7 Acquisition Date       | 2022-02-18T16:34:31 |
| 8 Spectrometer Frequency | 100.61              |
| 9 Spectral Width         | 24038.5             |

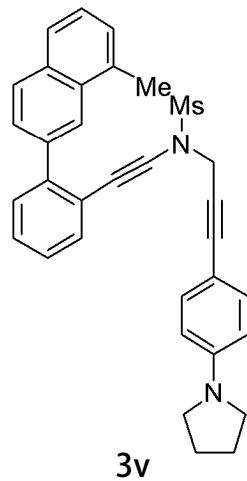

147.92  
144.11  
138.23  
134.62  
133.01  
132.82  
129.76  
128.23  
127.91  
127.29  
127.10  
126.80  
126.01  
125.72  
124.38  
107.17

88.42  
84.46  
78.97  
77.32  
77.00  
76.68  
70.89

47.42  
43.27  
38.31  
25.39  
19.38

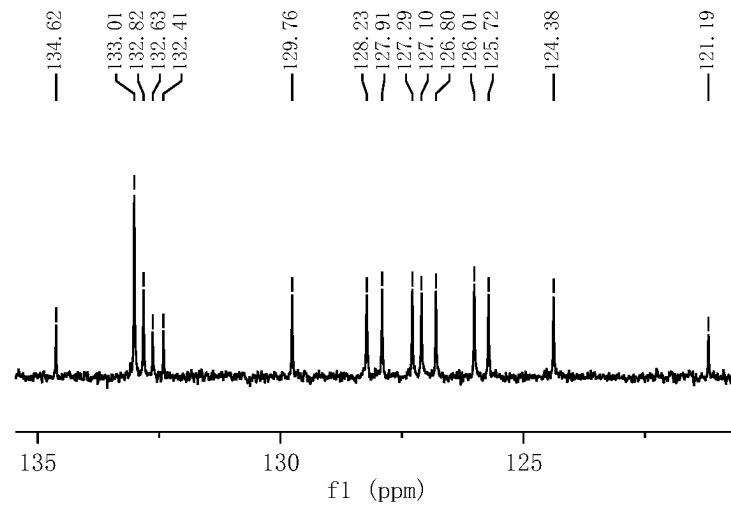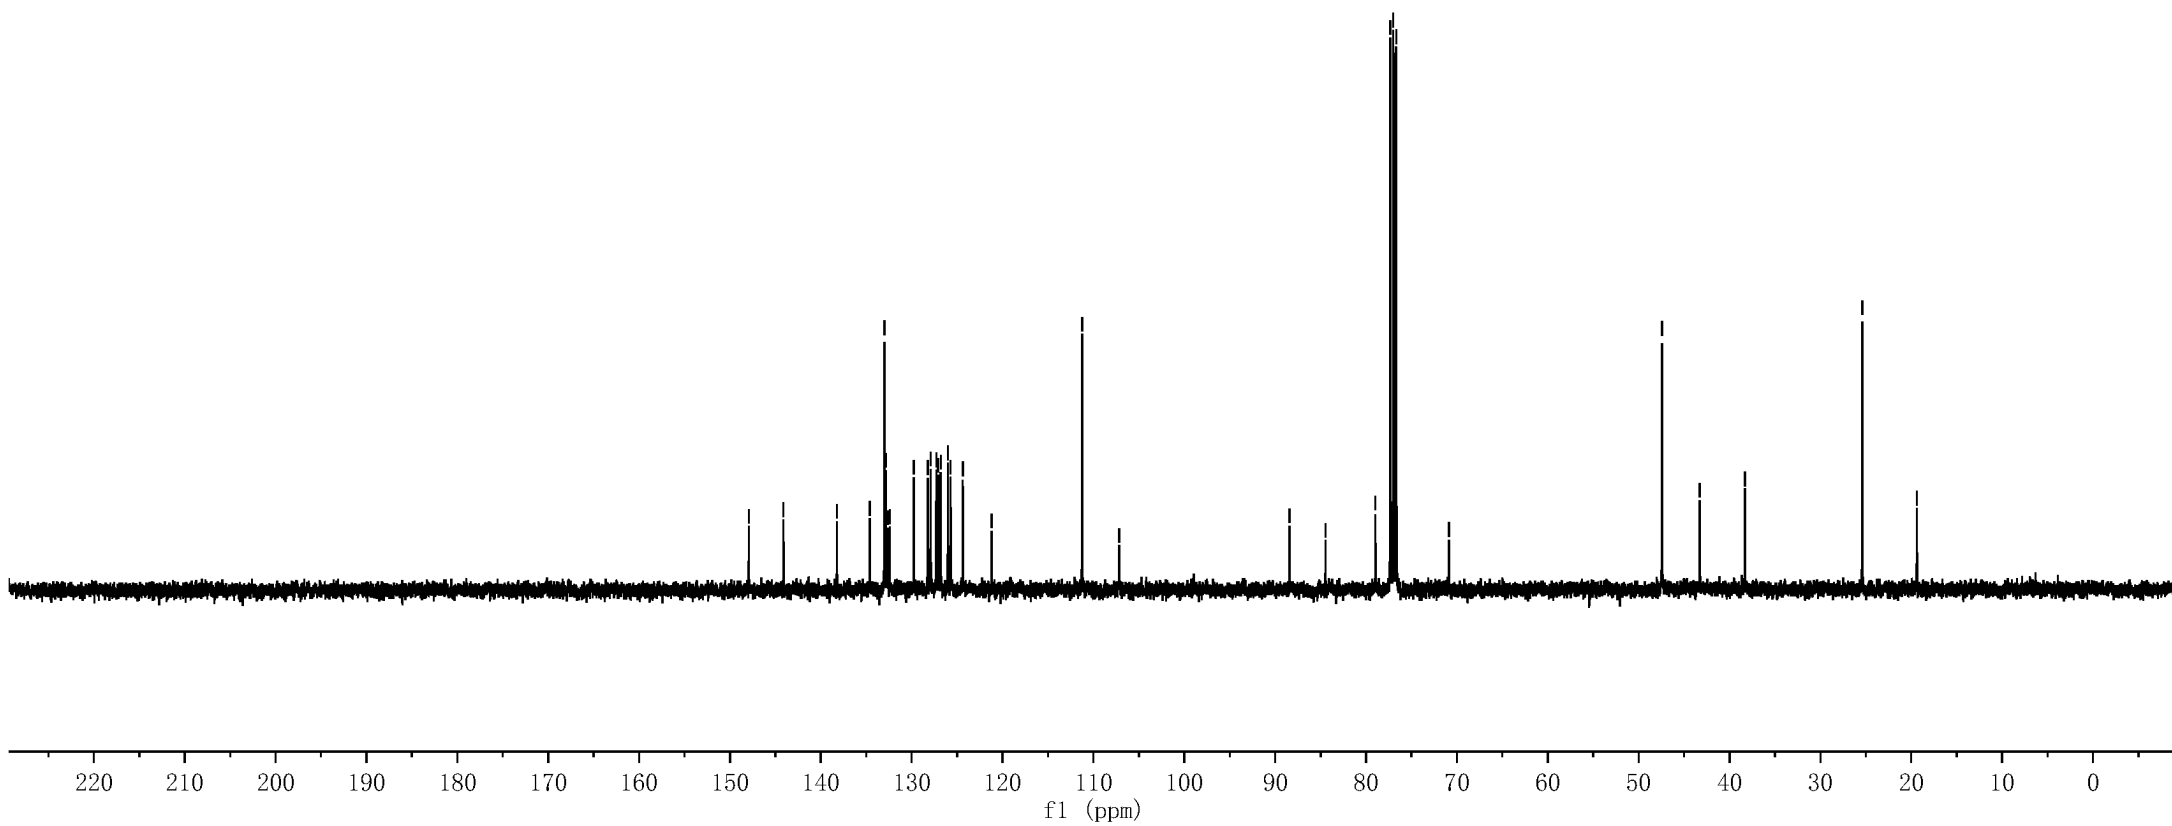

| Parameter                | Value               |
|--------------------------|---------------------|
| 1 Title                  | ZYX-4-50-H          |
| 2 Origin                 | Bruker BioSpin GmbH |
| 3 Solvent                | CDCl3               |
| 4 Temperature            | 298.0               |
| 5 Number of Scans        | 17                  |
| 6 Acquisition Time       | 4.0894              |
| 7 Acquisition Date       | 2022-02-10T16:32:40 |
| 8 Spectrometer Frequency | 400.13              |
| 9 Spectral Width         | 8012.8              |

8.425  
7.837  
7.833  
7.777  
7.756  
7.589  
7.572  
7.493  
7.370  
7.354  
7.296  
7.133  
7.119  
6.809  
6.805  
6.793  
6.788  
6.392  
6.370

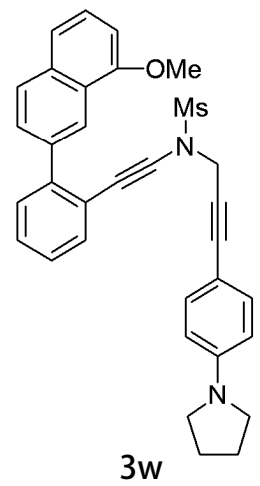

4.432  
3.968  
3.264  
3.248  
3.232  
2.864  
1.993  
1.977  
1.961  
0.000

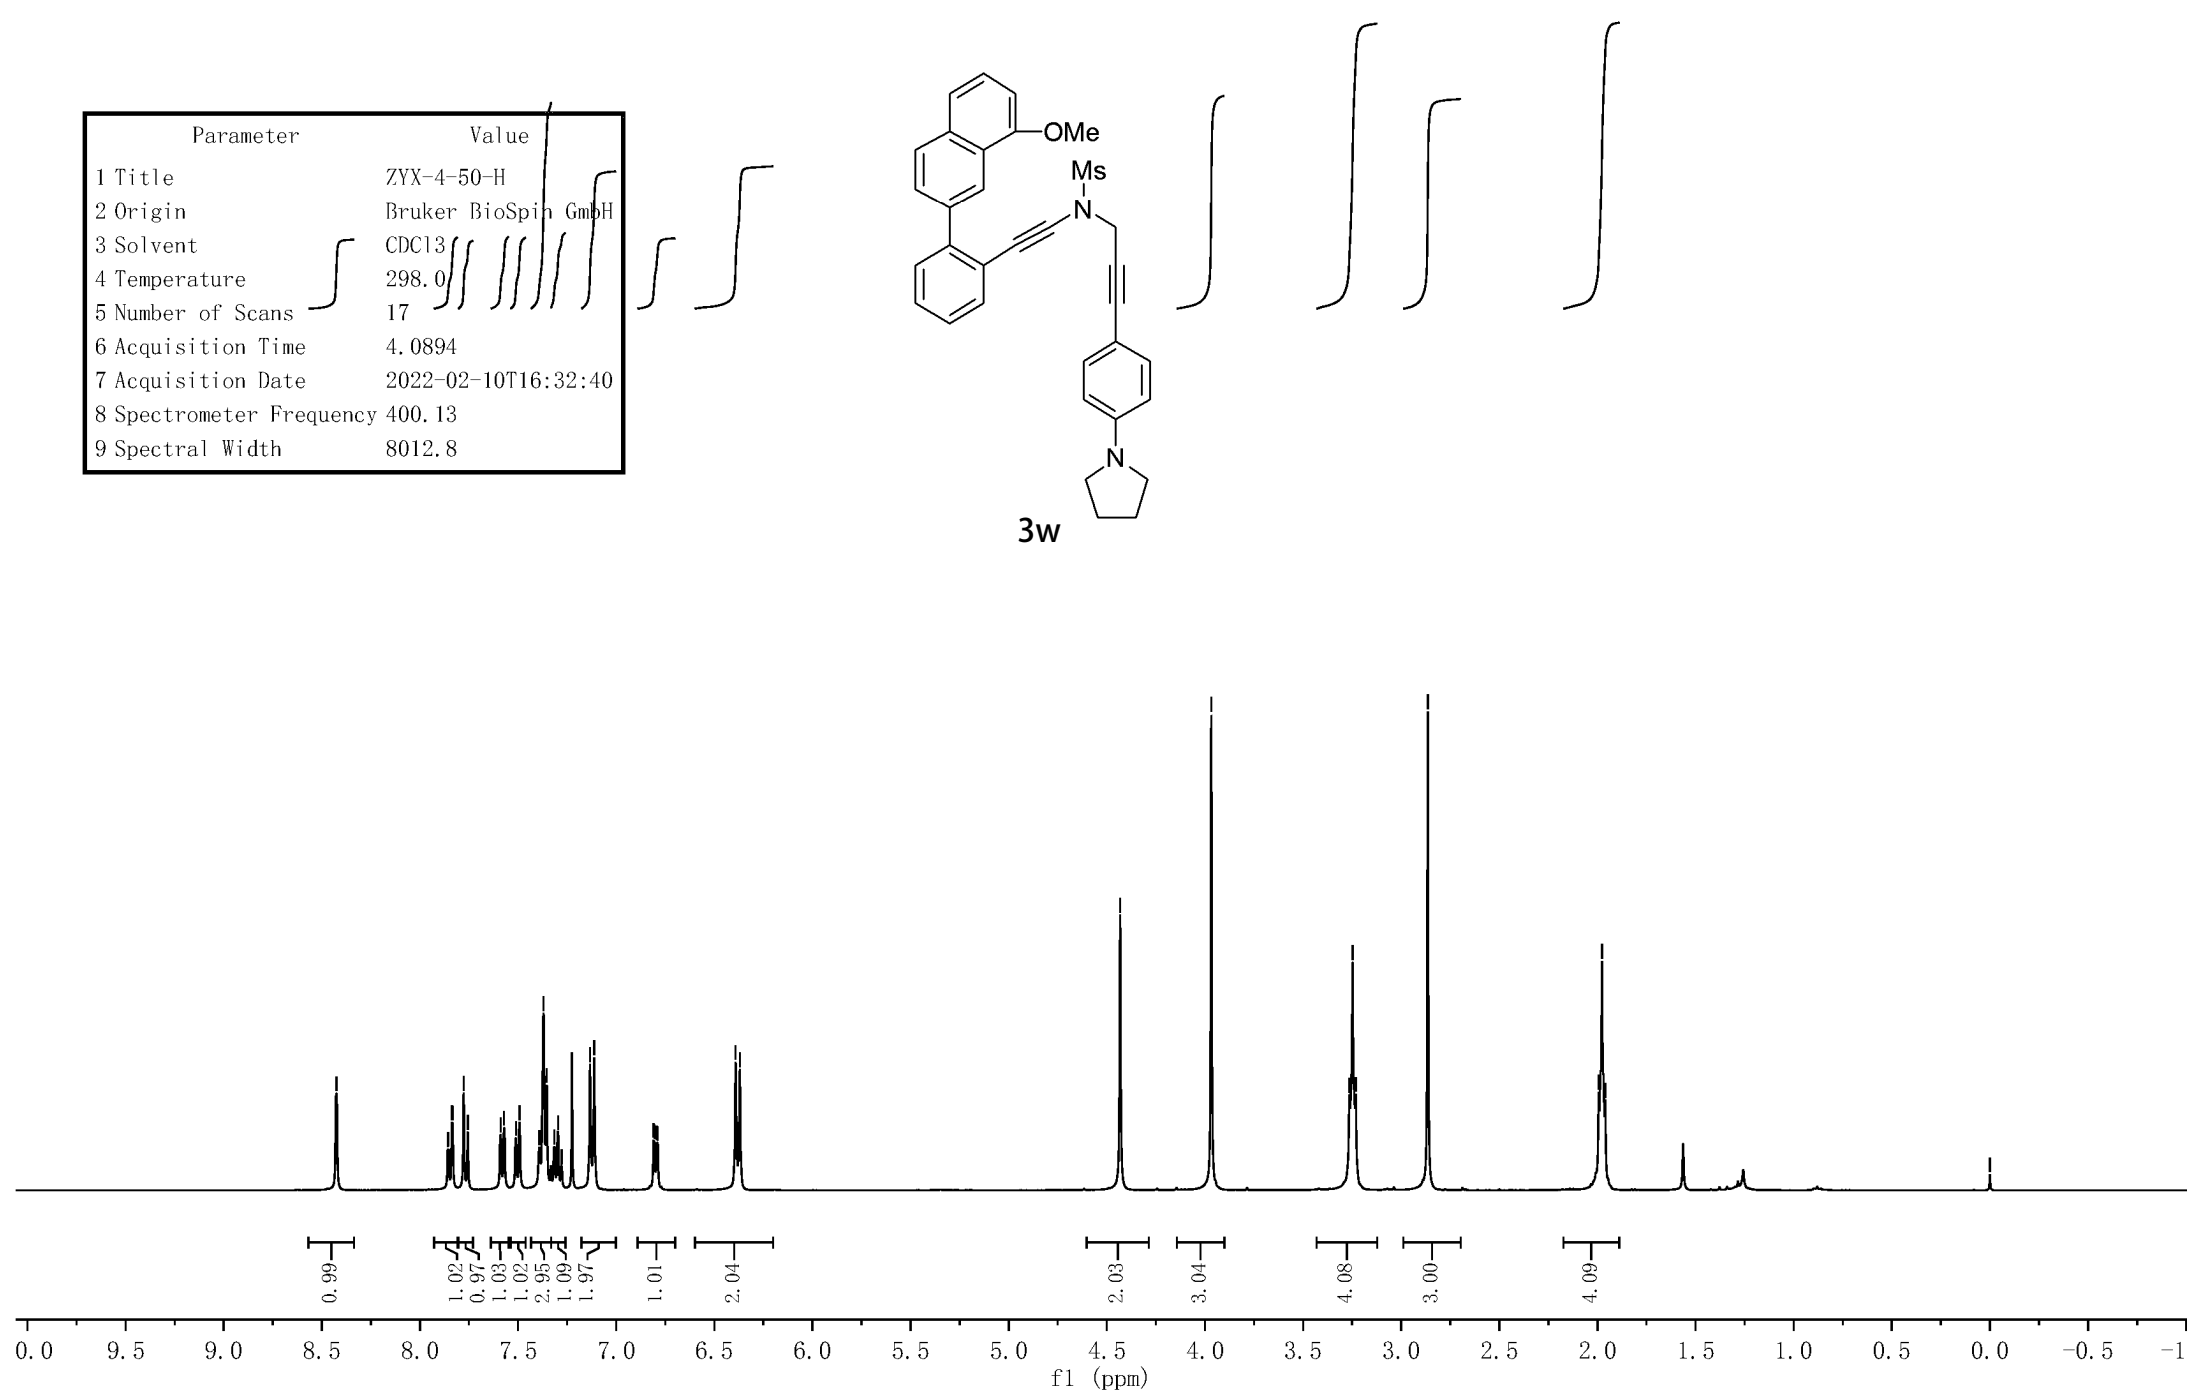



| Parameter                | Value               |
|--------------------------|---------------------|
| 1 Title                  | ZYX-4-50-C          |
| 2 Origin                 | Bruker BioSpin GmbH |
| 3 Solvent                | CDCl3               |
| 4 Temperature            | 300.0               |
| 5 Number of Scans        | 76                  |
| 6 Acquisition Time       | 1.3631              |
| 7 Acquisition Date       | 2022-02-10T16:34:58 |
| 8 Spectrometer Frequency | 100.61              |
| 9 Spectral Width         | 24038.5             |

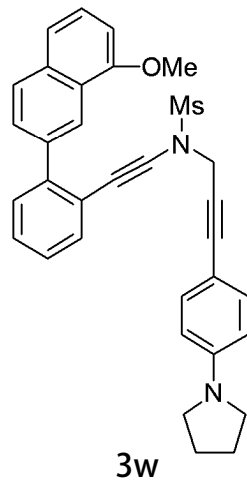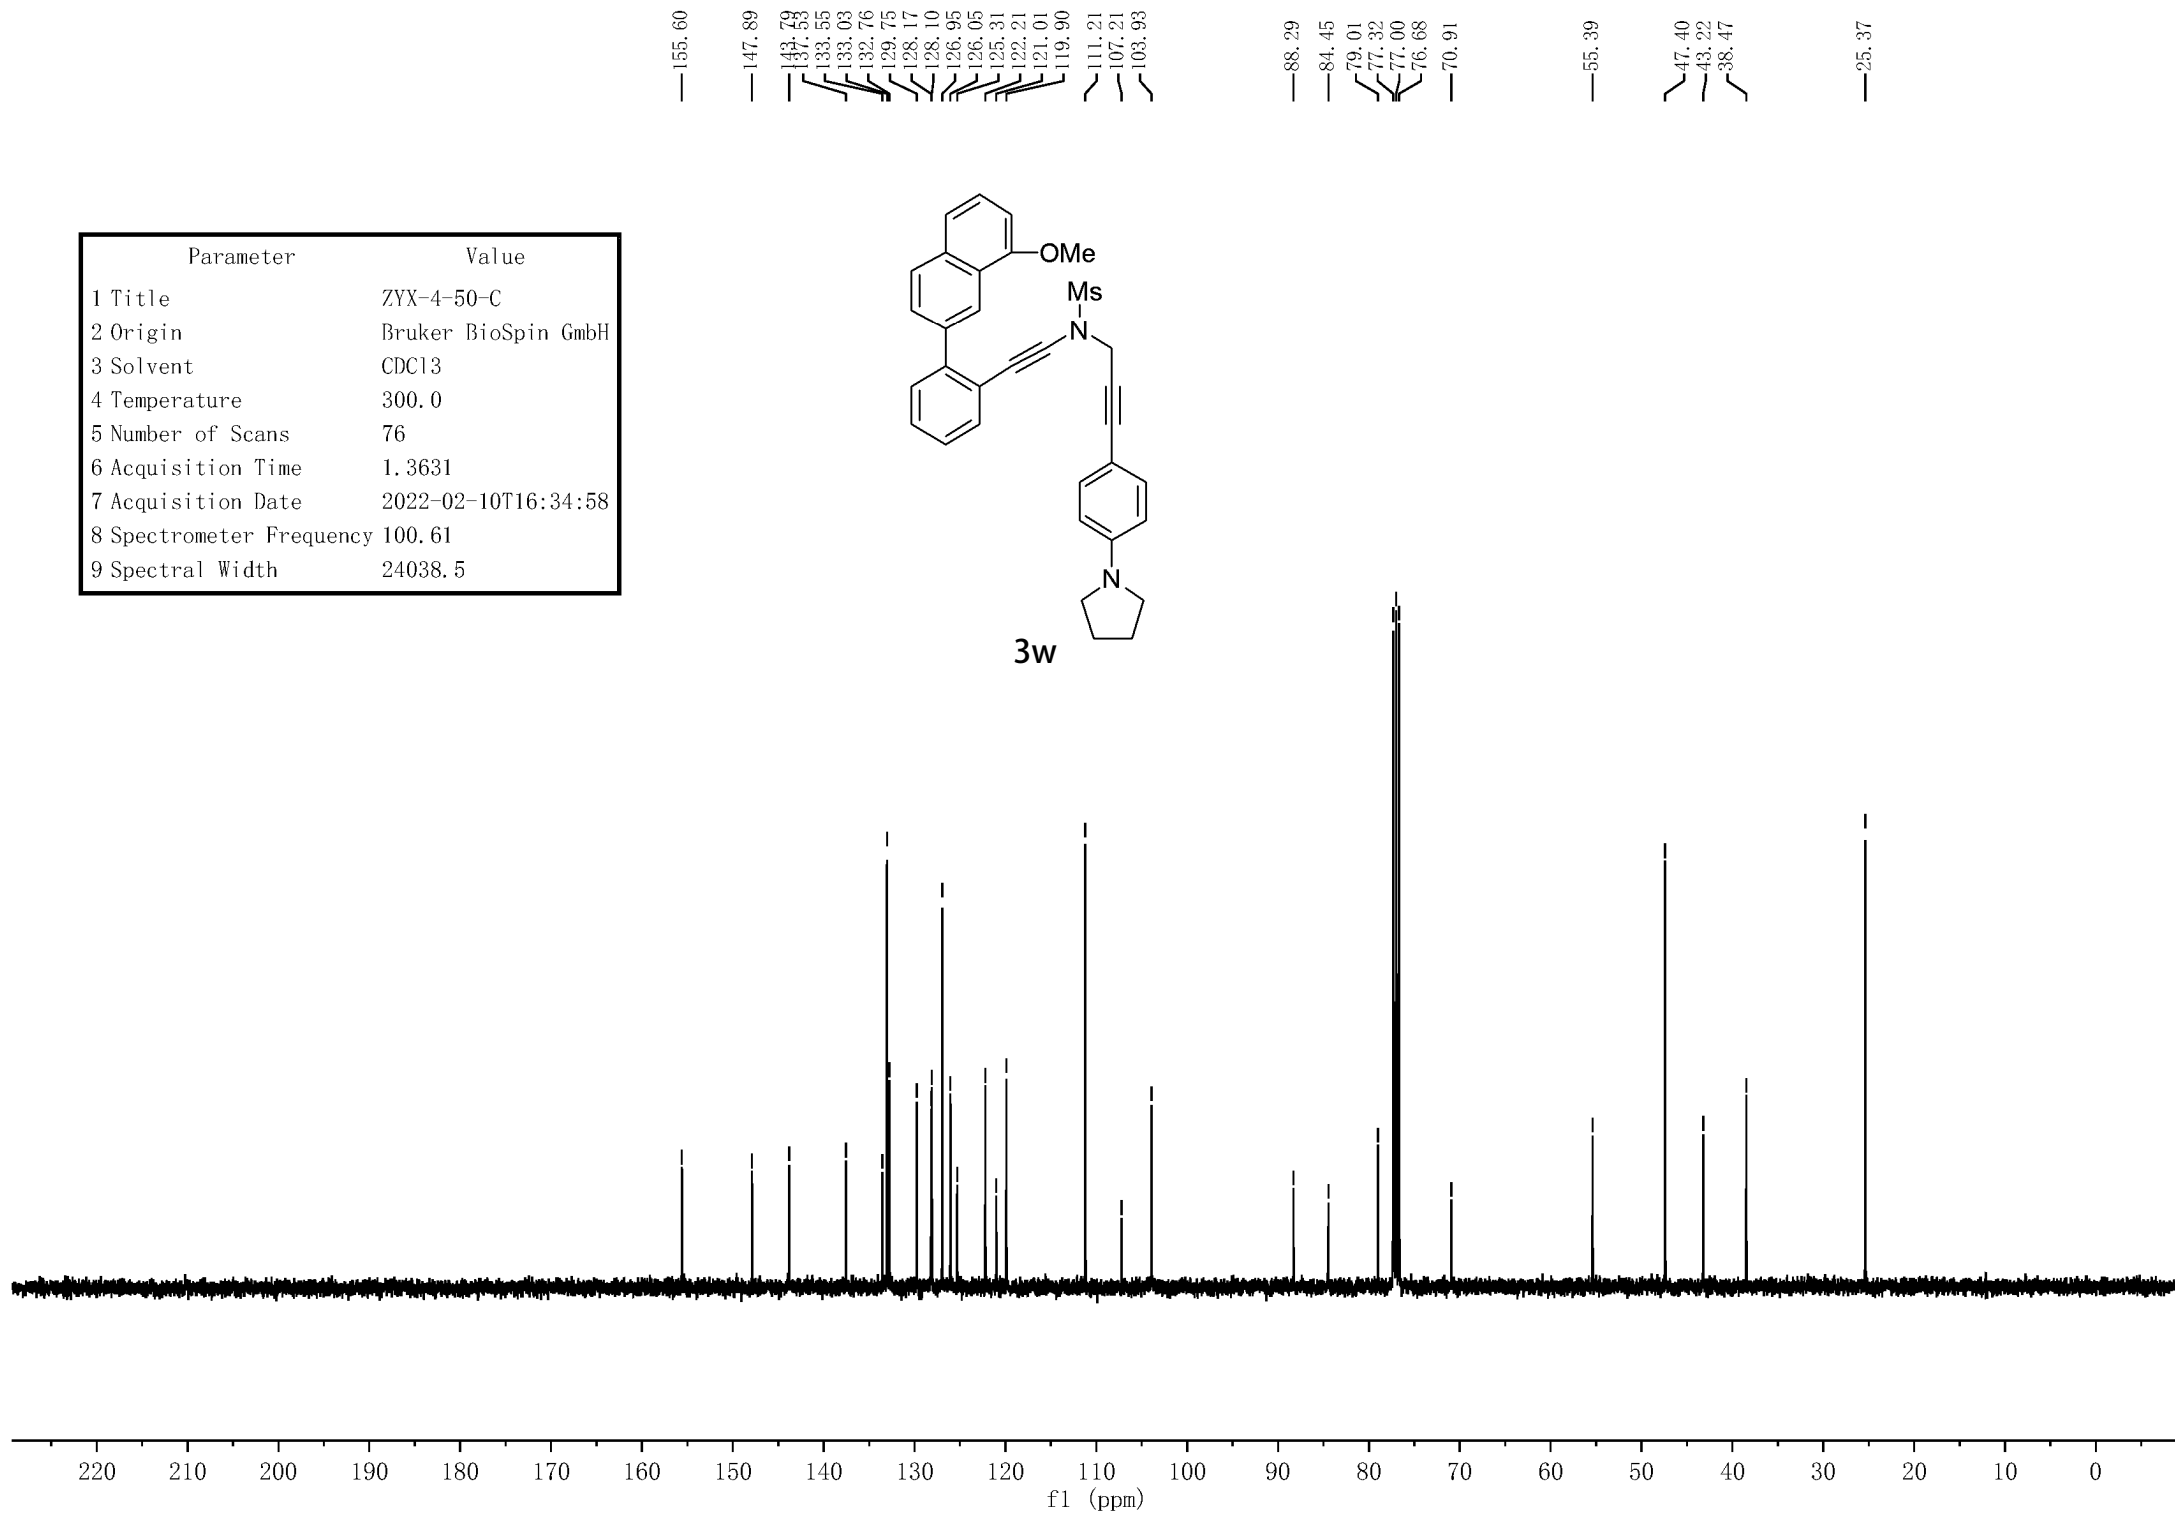

7.950  
7.786  
7.777  
7.771  
7.763  
7.694  
7.664  
7.656  
7.647  
7.484  
7.465  
7.363  
7.343  
7.325  
7.310  
7.272  
7.269  
7.254  
7.251  
7.235  
7.232  
7.201  
7.198  
7.182  
7.179  
7.163  
7.160  
7.068  
7.048  
6.416  
6.394

| Parameter                | Value               |
|--------------------------|---------------------|
| 1 Title                  | zyx-3-85-h          |
| 2 Origin                 | Bruker Biospin GmbH |
| 3 Solvent                | CDCl3               |
| 4 Temperature            | 298.0               |
| 5 Number of Scans        | 8                   |
| 6 Acquisition Time       | 4.0894              |
| 7 Acquisition Date       | 2021-11-24T20:20:47 |
| 8 Spectrometer Frequency | 400.13              |
| 9 Spectral Width         | 8012.8              |

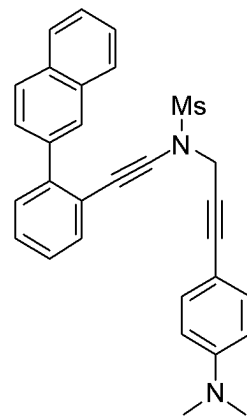

3x

4.290

2.789  
2.661

0.000

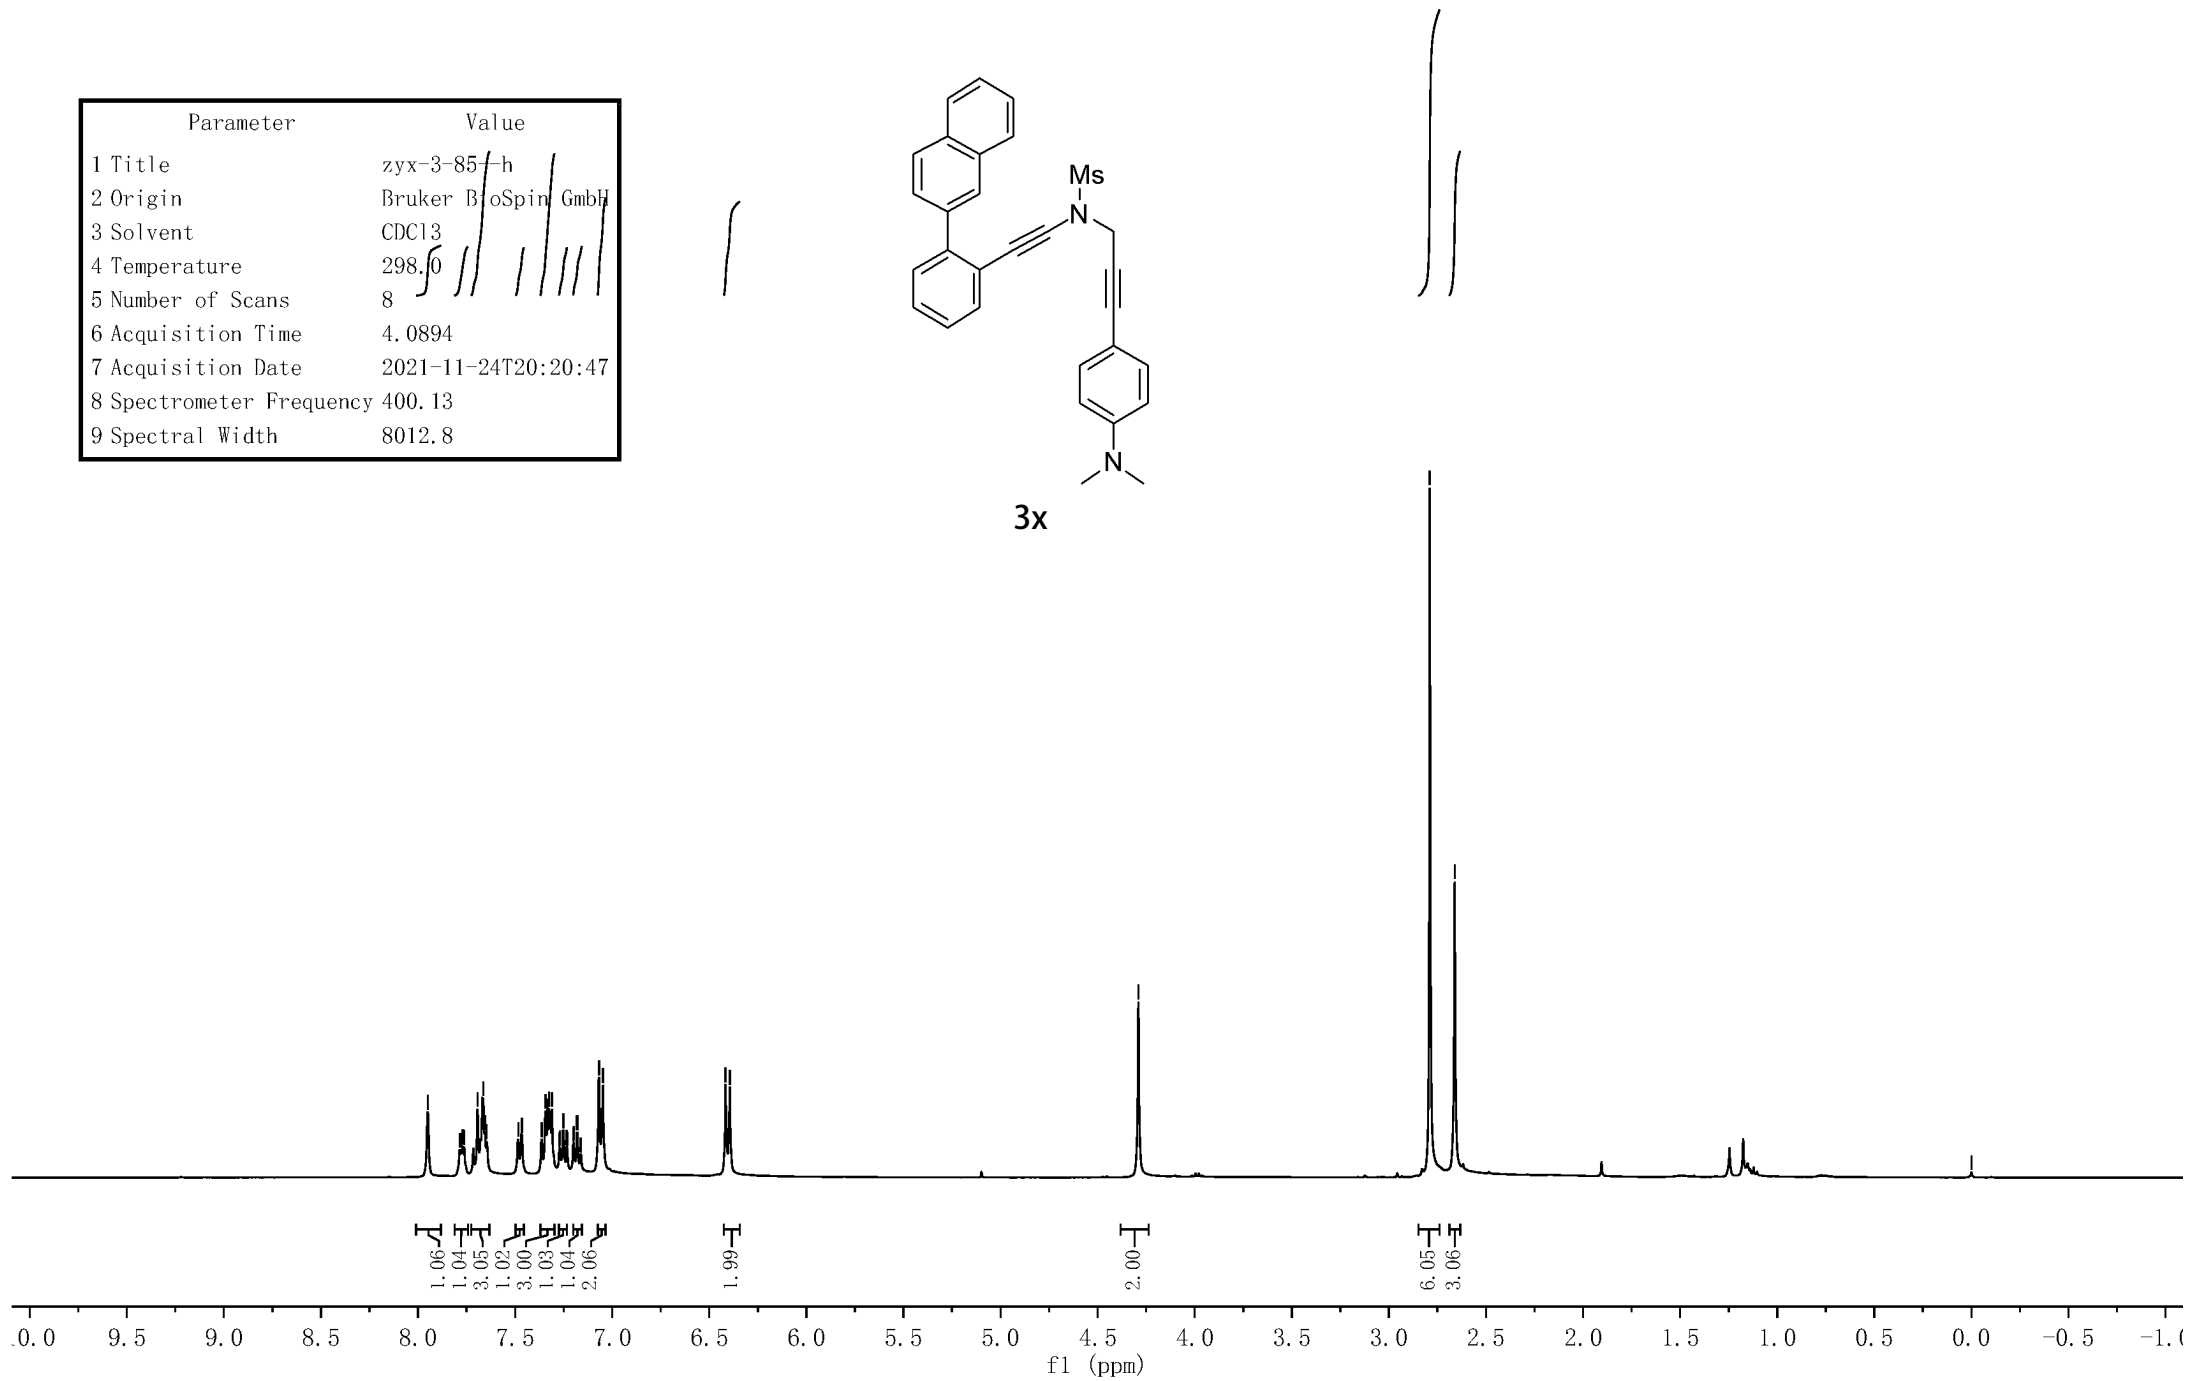

| Parameter                | Value               |
|--------------------------|---------------------|
| 1 Title                  | zyx-3--85--c        |
| 2 Origin                 | Bruker BioSpin GmbH |
| 3 Solvent                | CDCl3               |
| 4 Temperature            | 300.0               |
| 5 Number of Scans        | 33                  |
| 6 Acquisition Time       | 1.3631              |
| 7 Acquisition Date       | 2021-11-24T20:22:11 |
| 8 Spectrometer Frequency | 100.61              |
| 9 Spectral Width         | 24038.5             |

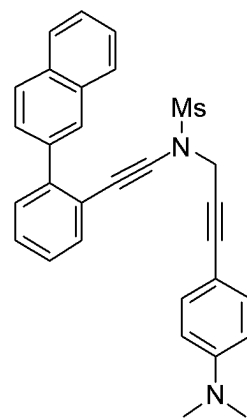

3x

150.35  
 143.28  
 137.94  
 132.85  
 128.24  
 127.96  
 127.45  
 127.39  
 111.52  
 107.97  
 88.08  
 84.44  
 79.20  
 77.32  
 77.00  
 76.68  
 70.94  
 43.10  
 39.93  
 38.26

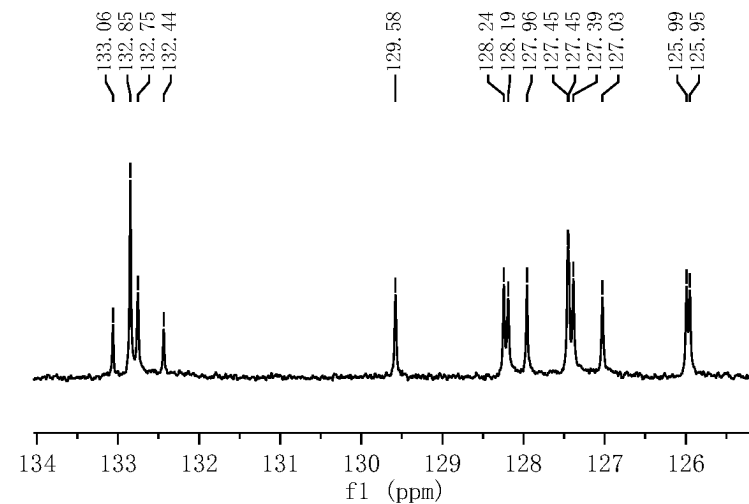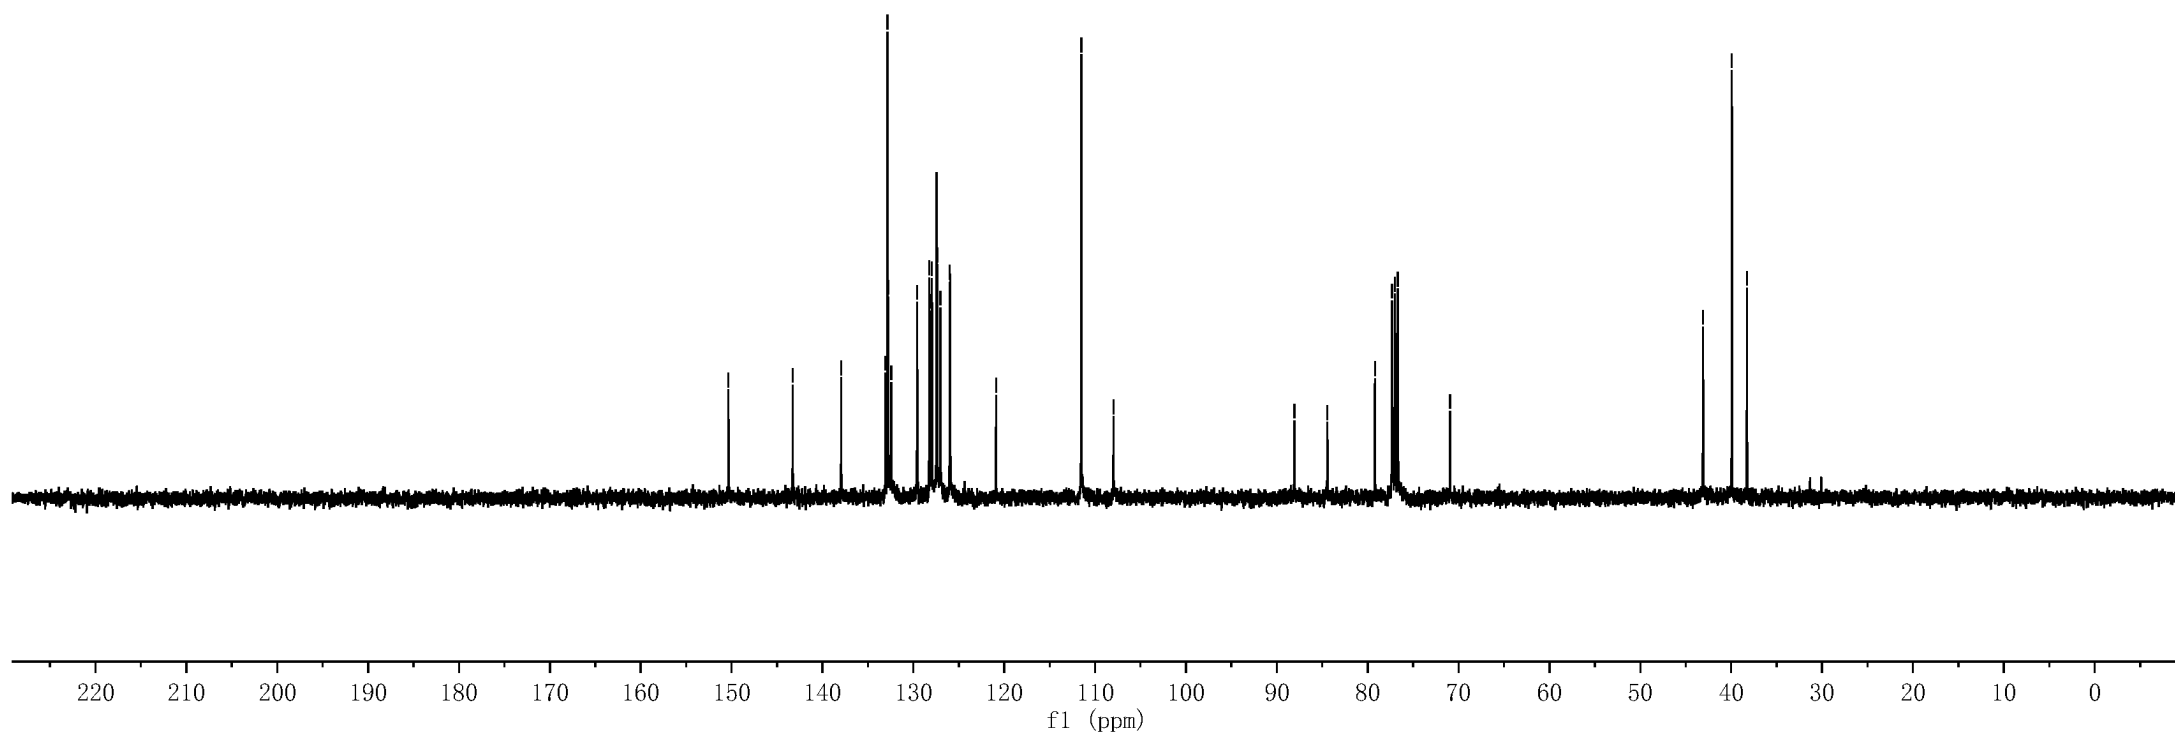

8.032  
7.852  
7.839  
7.829  
7.791  
7.770  
7.739  
7.726  
7.580  
7.561  
7.467  
7.450  
7.386  
7.376  
7.367  
7.329  
7.312  
7.293  
7.263  
7.200  
7.195  
7.176  
7.075  
7.053  
6.578  
6.555

4.634  
4.375

2.749

0.000

| Parameter                | Value               |
|--------------------------|---------------------|
| 1 Title                  | zyx-3-152---h       |
| 2 Origin                 | Bruker/BioSpin GmbH |
| 3 Solvent                | CDCl3               |
| 4 Temperature            | 298.0               |
| 5 Number of Scans        | 7                   |
| 6 Acquisition Time       | 4.0894              |
| 7 Acquisition Date       | 2021-12-06T16:16:31 |
| 8 Spectrometer Frequency | 400.13              |
| 9 Spectral Width         | 8012.8              |

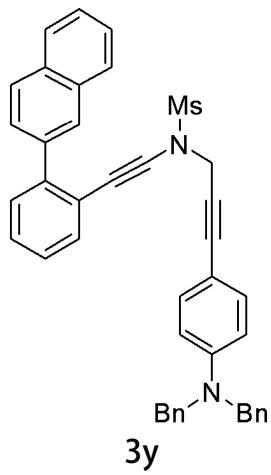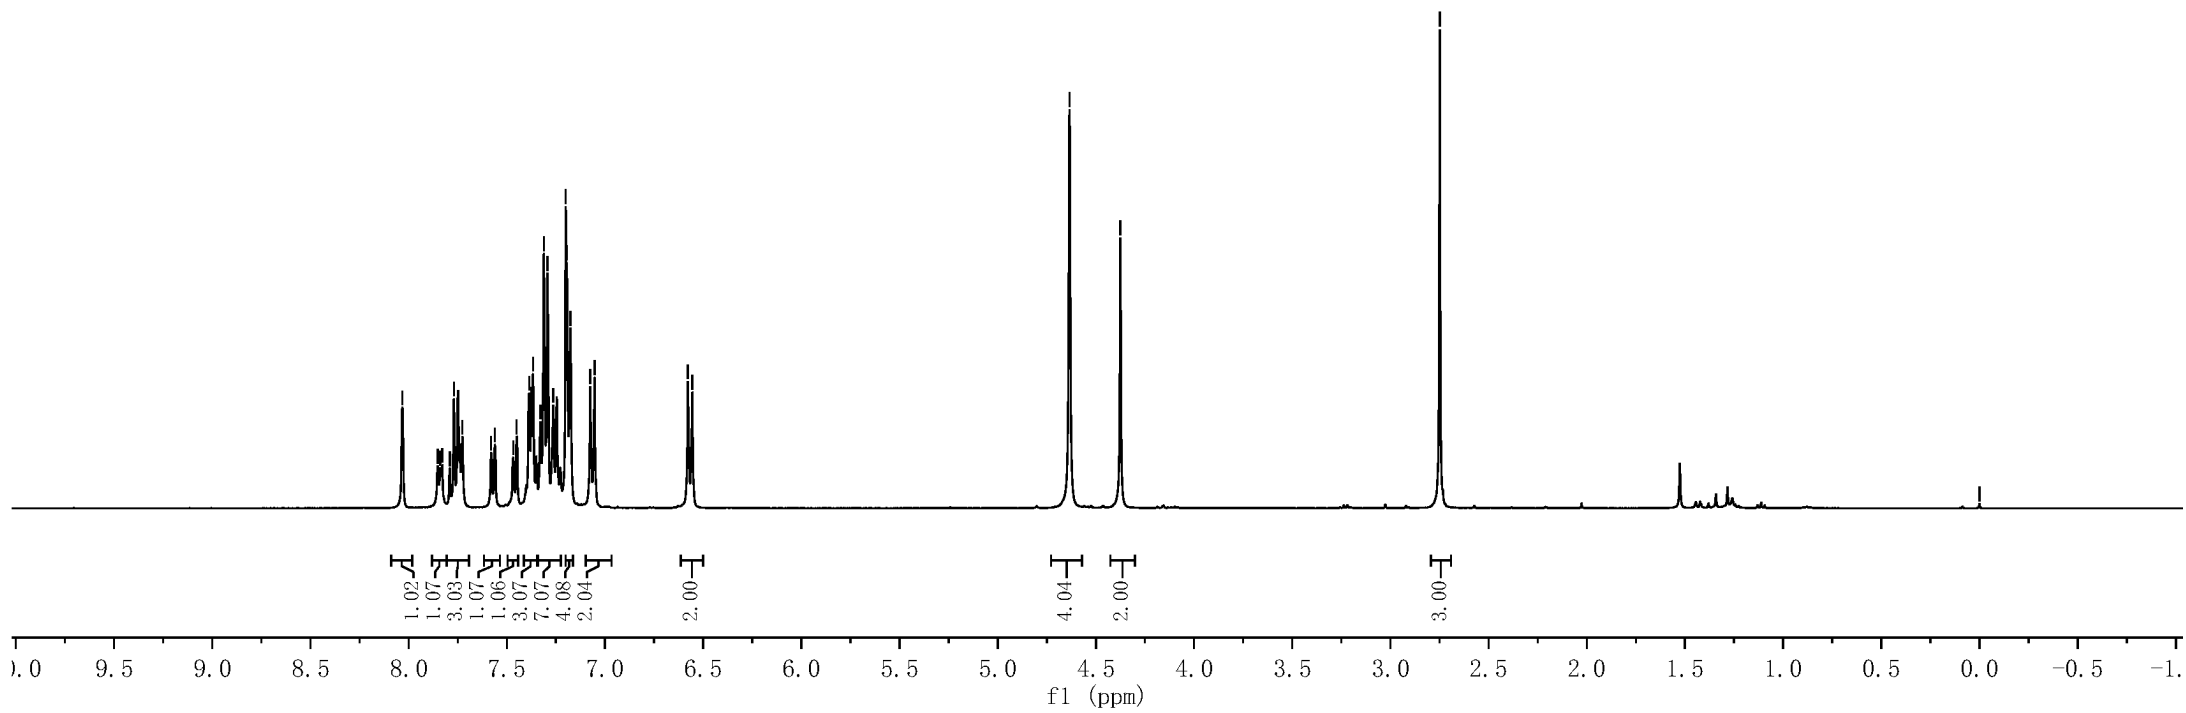

| Parameter                | Value               |
|--------------------------|---------------------|
| 1 Title                  | zyx-3-152---c       |
| 2 Origin                 | Bruker BioSpin GmbH |
| 3 Solvent                | CDCl3               |
| 4 Temperature            | 300.0               |
| 5 Number of Scans        | 59                  |
| 6 Acquisition Time       | 1.3631              |
| 7 Acquisition Date       | 2021-12-06T16:17:50 |
| 8 Spectrometer Frequency | 100.61              |
| 9 Spectral Width         | 24038.5             |

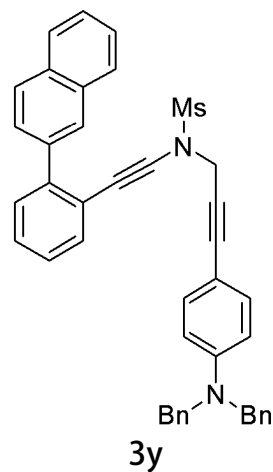

149.29  
143.42  
137.66  
133.11  
128.73  
128.27  
127.49  
127.10  
127.08  
126.89

111.95  
108.84

87.85  
84.40  
79.38  
77.32  
77.00  
76.68  
70.96

54.08

43.12  
38.34

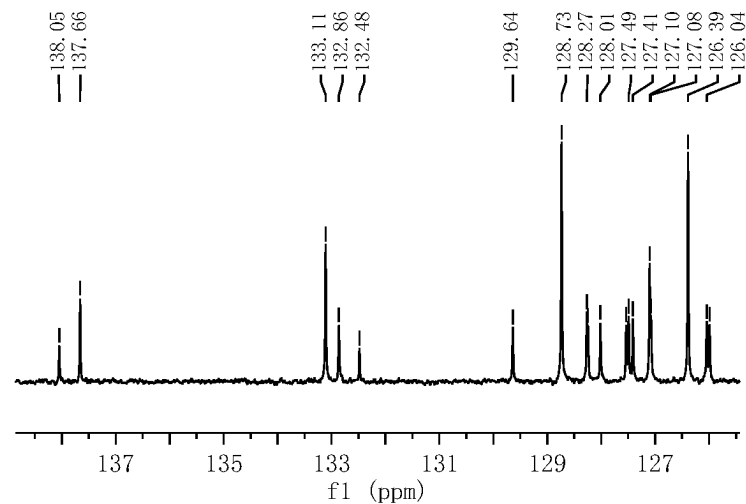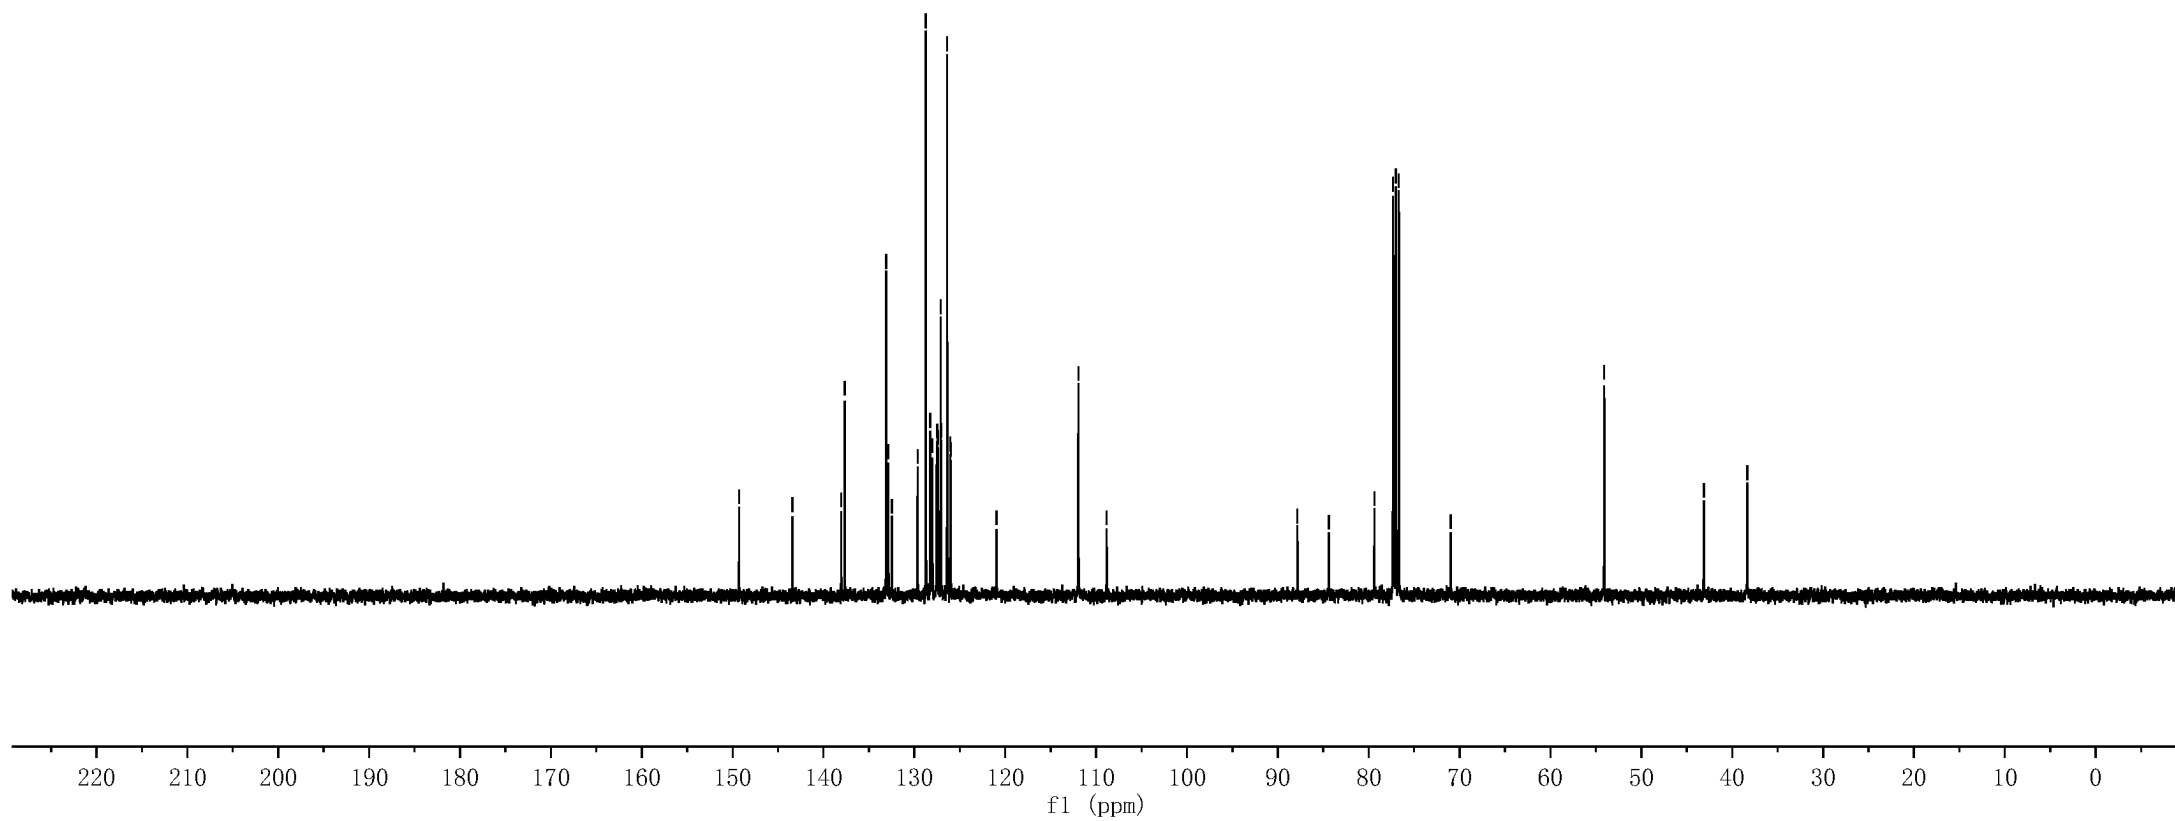

| Parameter                | Value               |
|--------------------------|---------------------|
| 1 Title                  | zyx-6-66-c          |
| 2 Origin                 | Bruker BioSpin GmbH |
| 3 Solvent                | CDCl <sub>3</sub>   |
| 4 Temperature            | 300.0               |
| 5 Number of Scans        | 104                 |
| 6 Acquisition Time       | 1.3631              |
| 7 Acquisition Date       | 2022-08-15T15:29:49 |
| 8 Spectrometer Frequency | 100.61              |
| 9 Spectral Width         | 24038.5             |

7.922  
7.881  
7.823  
7.817  
7.808  
7.726  
7.705  
7.629  
7.608  
7.408  
7.399  
7.391  
7.384  
7.180  
7.158  
6.416  
6.394

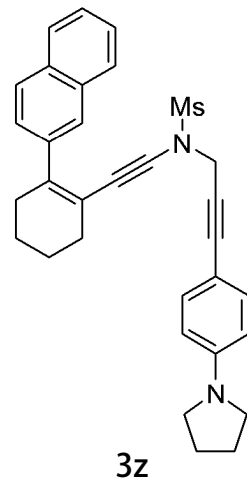

4.335  
3.276  
3.260  
3.244  
2.660  
2.528  
2.513  
2.408  
2.394  
2.001  
1.985  
1.969  
1.794  
1.780  
1.744  
0.000

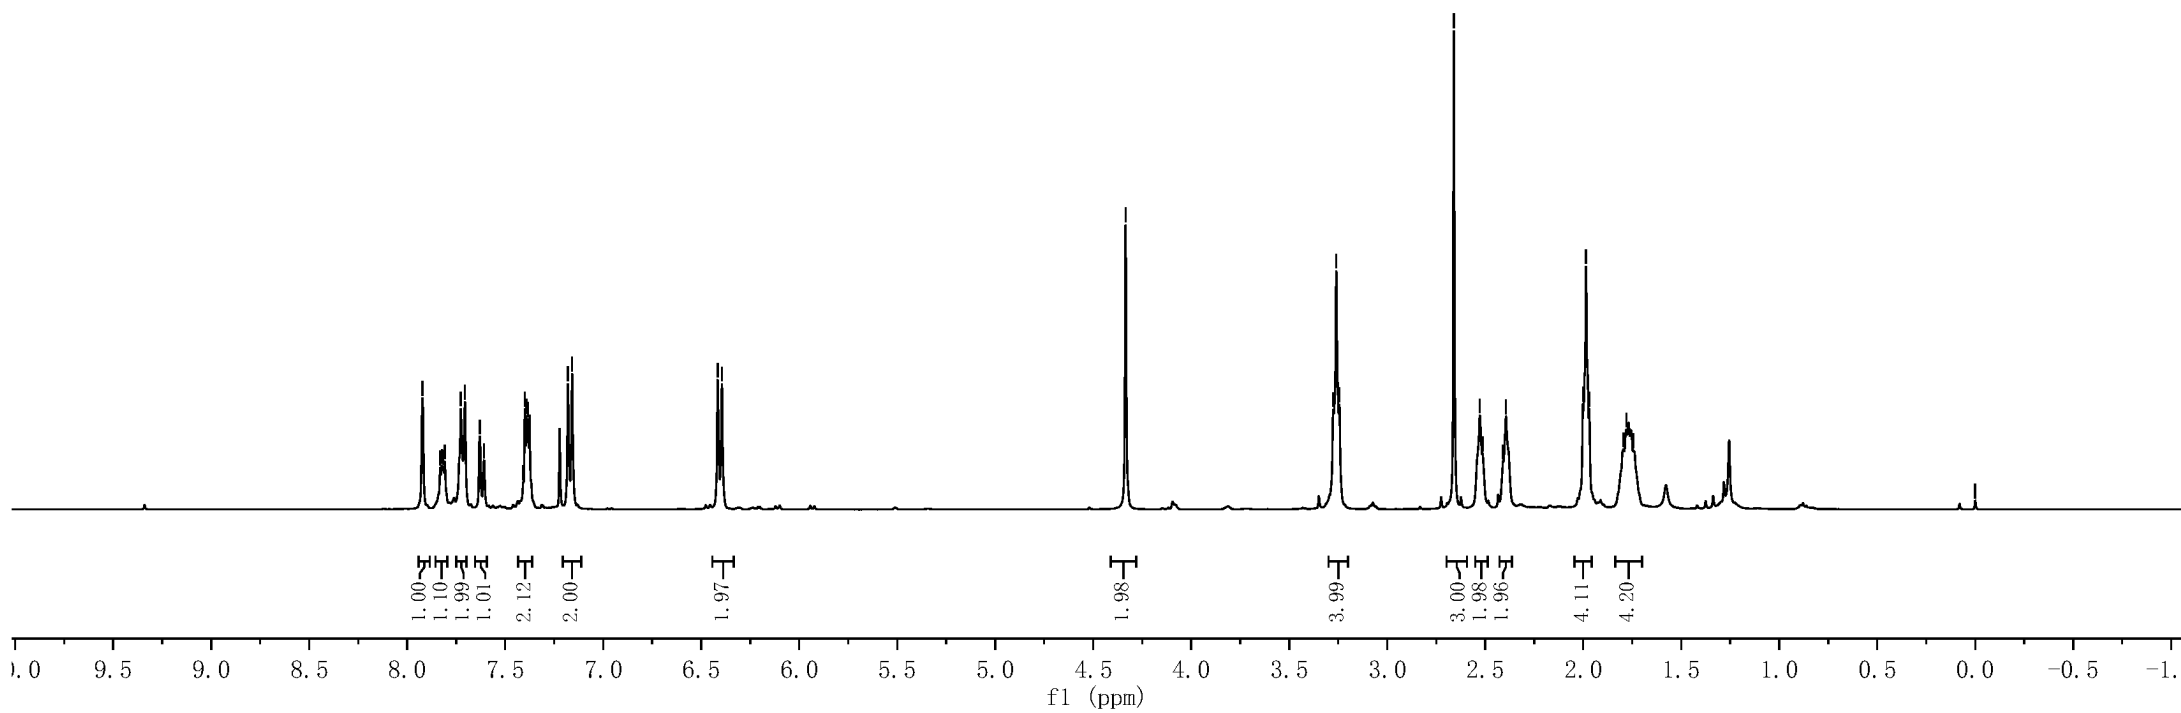

| Parameter                | Value               |
|--------------------------|---------------------|
| 1 Title                  | zyx-6-66-c          |
| 2 Origin                 | Bruker BioSpin GmbH |
| 3 Solvent                | CDCl3               |
| 4 Temperature            | 300.0               |
| 5 Number of Scans        | 104                 |
| 6 Acquisition Time       | 1.3631              |
| 7 Acquisition Date       | 2022-08-15T15:29:49 |
| 8 Spectrometer Frequency | 100.61              |
| 9 Spectral Width         | 24038.5             |



147.90  
143.12  
140.21  
133.10  
133.00  
128.18  
127.38  
127.14  
126.45  
126.34  
125.77  
116.88

111.25  
107.34

88.19  
83.08  
79.13  
77.32  
77.00  
76.68  
72.82

47.41

43.23

37.81

31.04

30.88

25.37

22.69

22.31

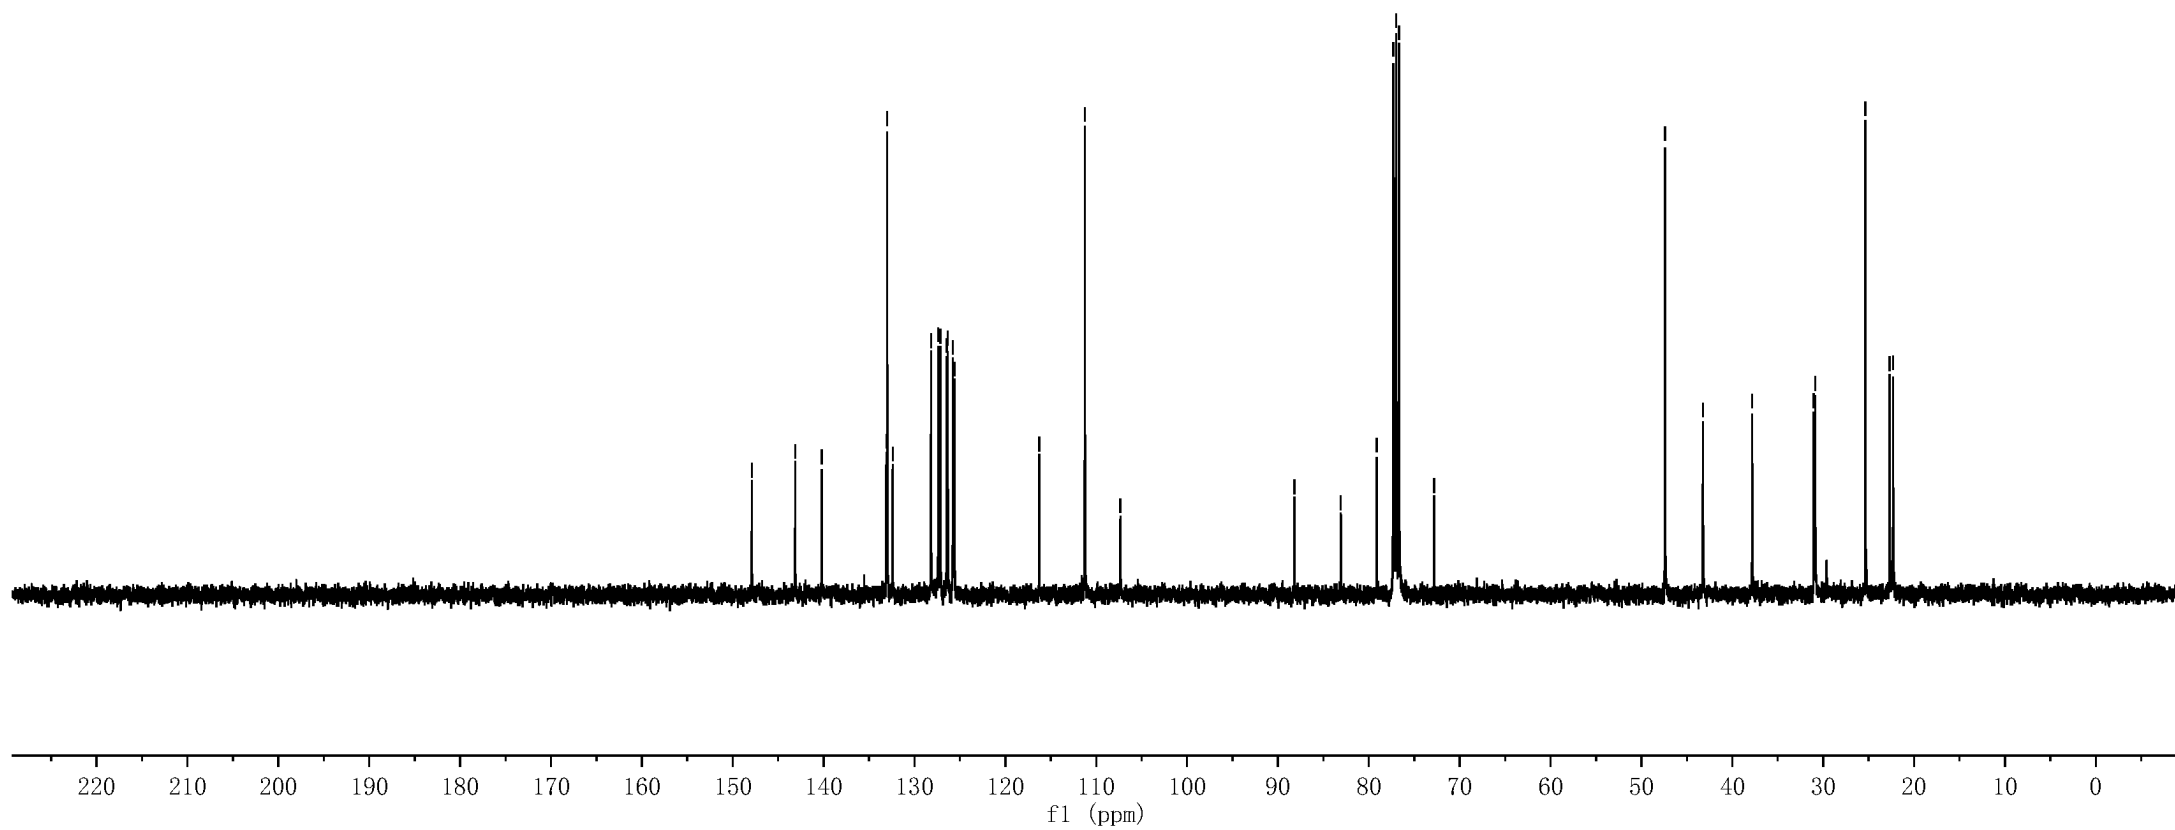

| Parameter                | Value               |
|--------------------------|---------------------|
| 1 Title                  | zyx-10-236-s-h      |
| 2 Origin                 | Bruker Biospin GmbH |
| 3 Solvent                | CDCl3               |
| 4 Temperature            | 298.0               |
| 5 Number of Scans        | 4                   |
| 6 Acquisition Time       | 4.0894              |
| 7 Acquisition Date       | 2023-10-13T10:45:03 |
| 8 Spectrometer Frequency | 400.13              |
| 9 Spectral Width         | 8012.8              |

7.845  
7.841  
7.824  
7.800  
7.786  
7.777  
7.635  
7.607  
7.594  
7.462  
7.453  
7.447  
7.431  
7.403  
7.375  
7.160  
7.138  
6.464  
6.442

4.136  
4.091  
4.039  
3.994

3.322  
3.311  
3.305  
3.288

2.409  
2.039  
2.030  
2.022  
2.014  
2.006

0.000

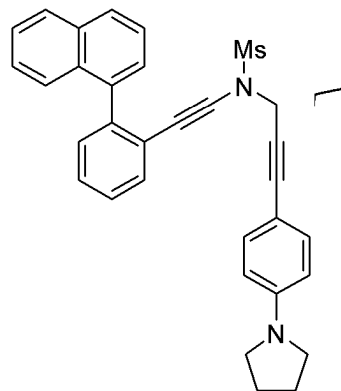

3aa

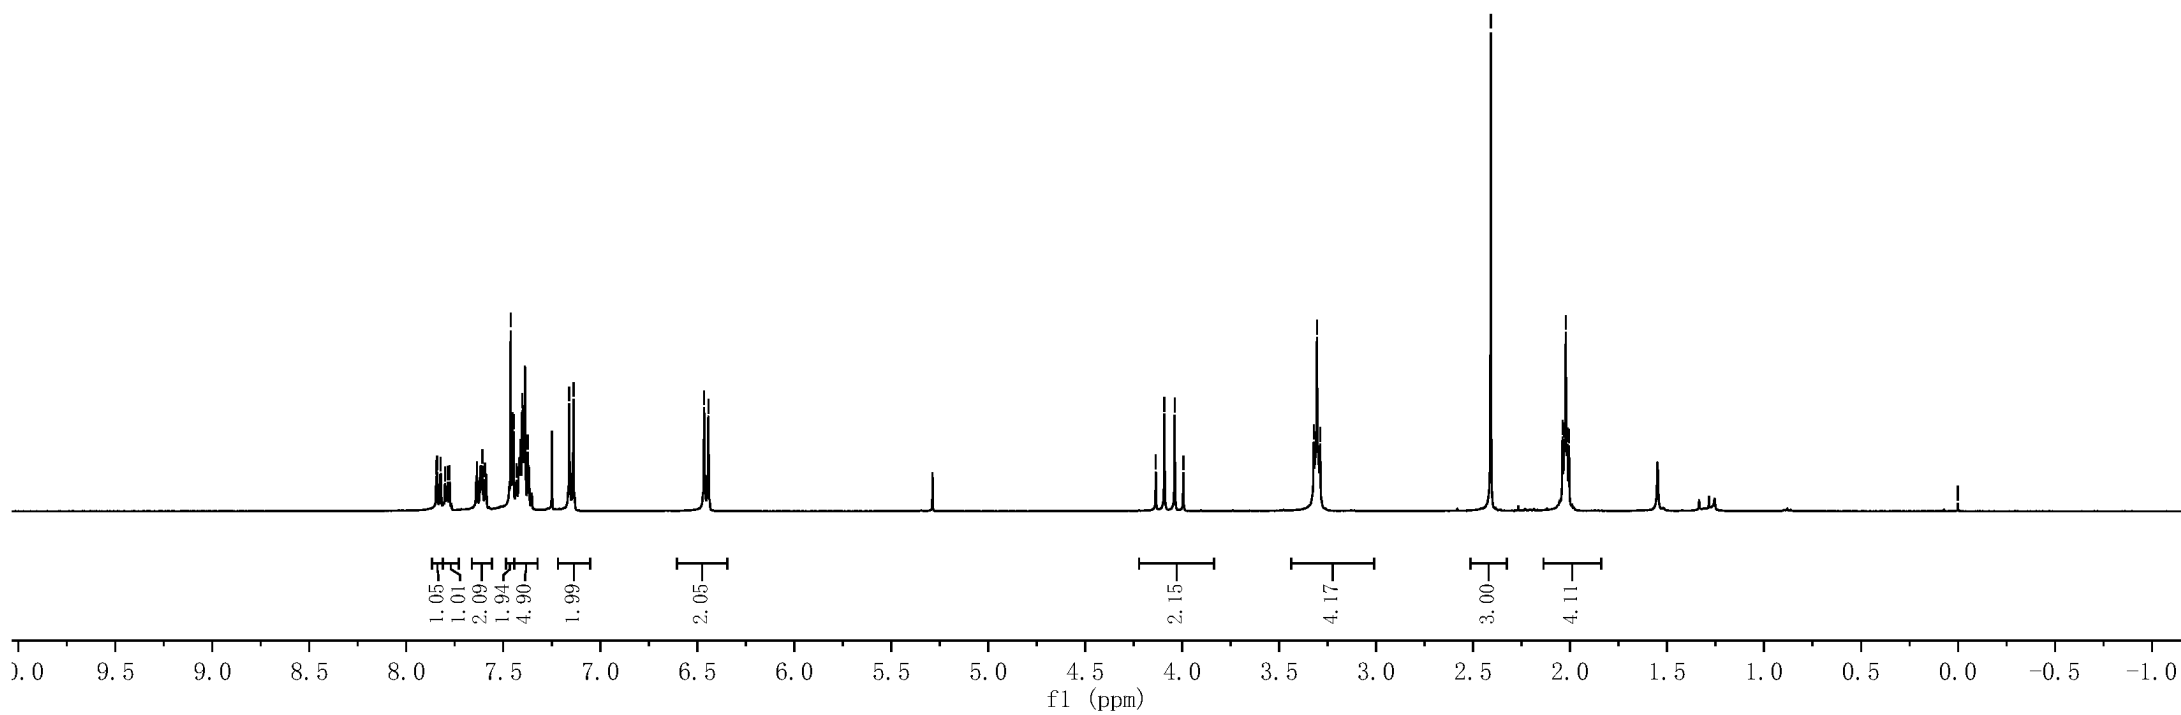



| Parameter                | Value               |
|--------------------------|---------------------|
| 1 Title                  | 10                  |
| 2 Origin                 |                     |
| 3 Solvent                | CDC13               |
| 4 Temperature            | 298.1               |
| 5 Number of Scans        | 600                 |
| 6 Acquisition Time       | 1.0000              |
| 7 Acquisition Date       | 2023-10-13T12:23:22 |
| 8 Spectrometer Frequency | 100.56              |
| 9 Spectral Width         | 26041.0             |

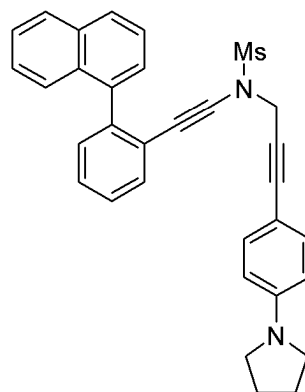

3aa

147.90  
142.66  
138.81  
133.06  
131.75  
130.44  
128.04  
127.78  
127.36  
126.30  
126.02  
125.69  
125.25  
107.38

88.02  
84.87  
78.74  
77.32  
77.00  
76.68  
70.40

47.47  
43.11  
37.79  
25.44

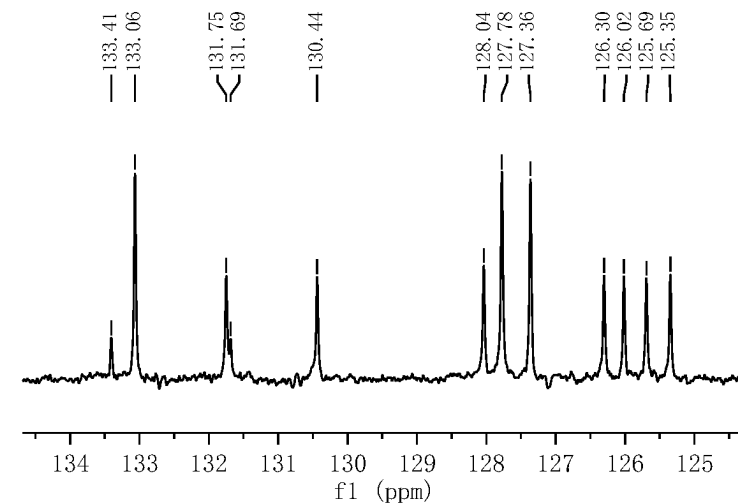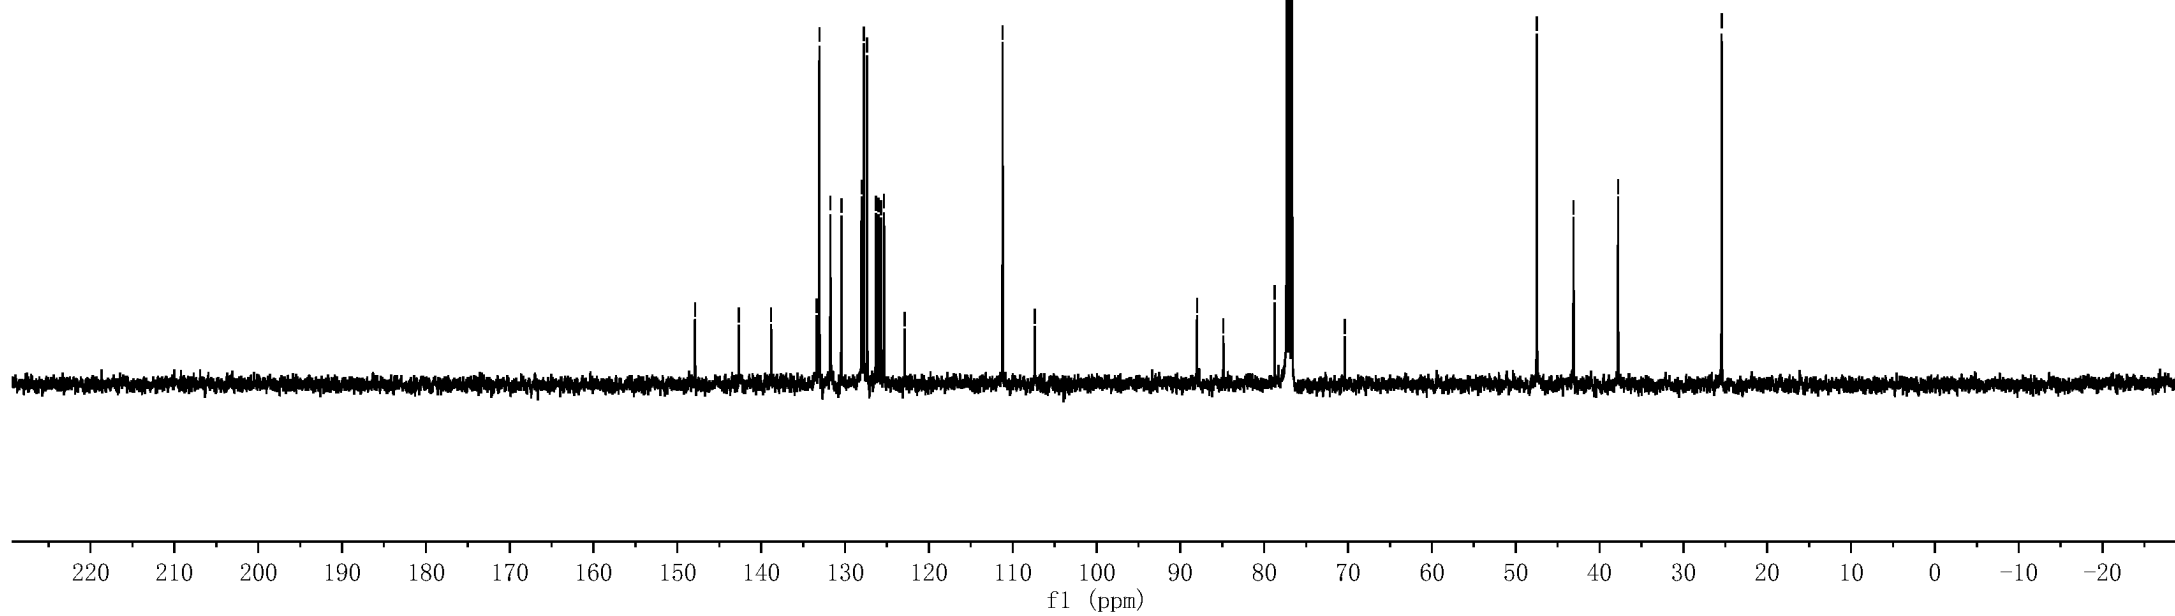

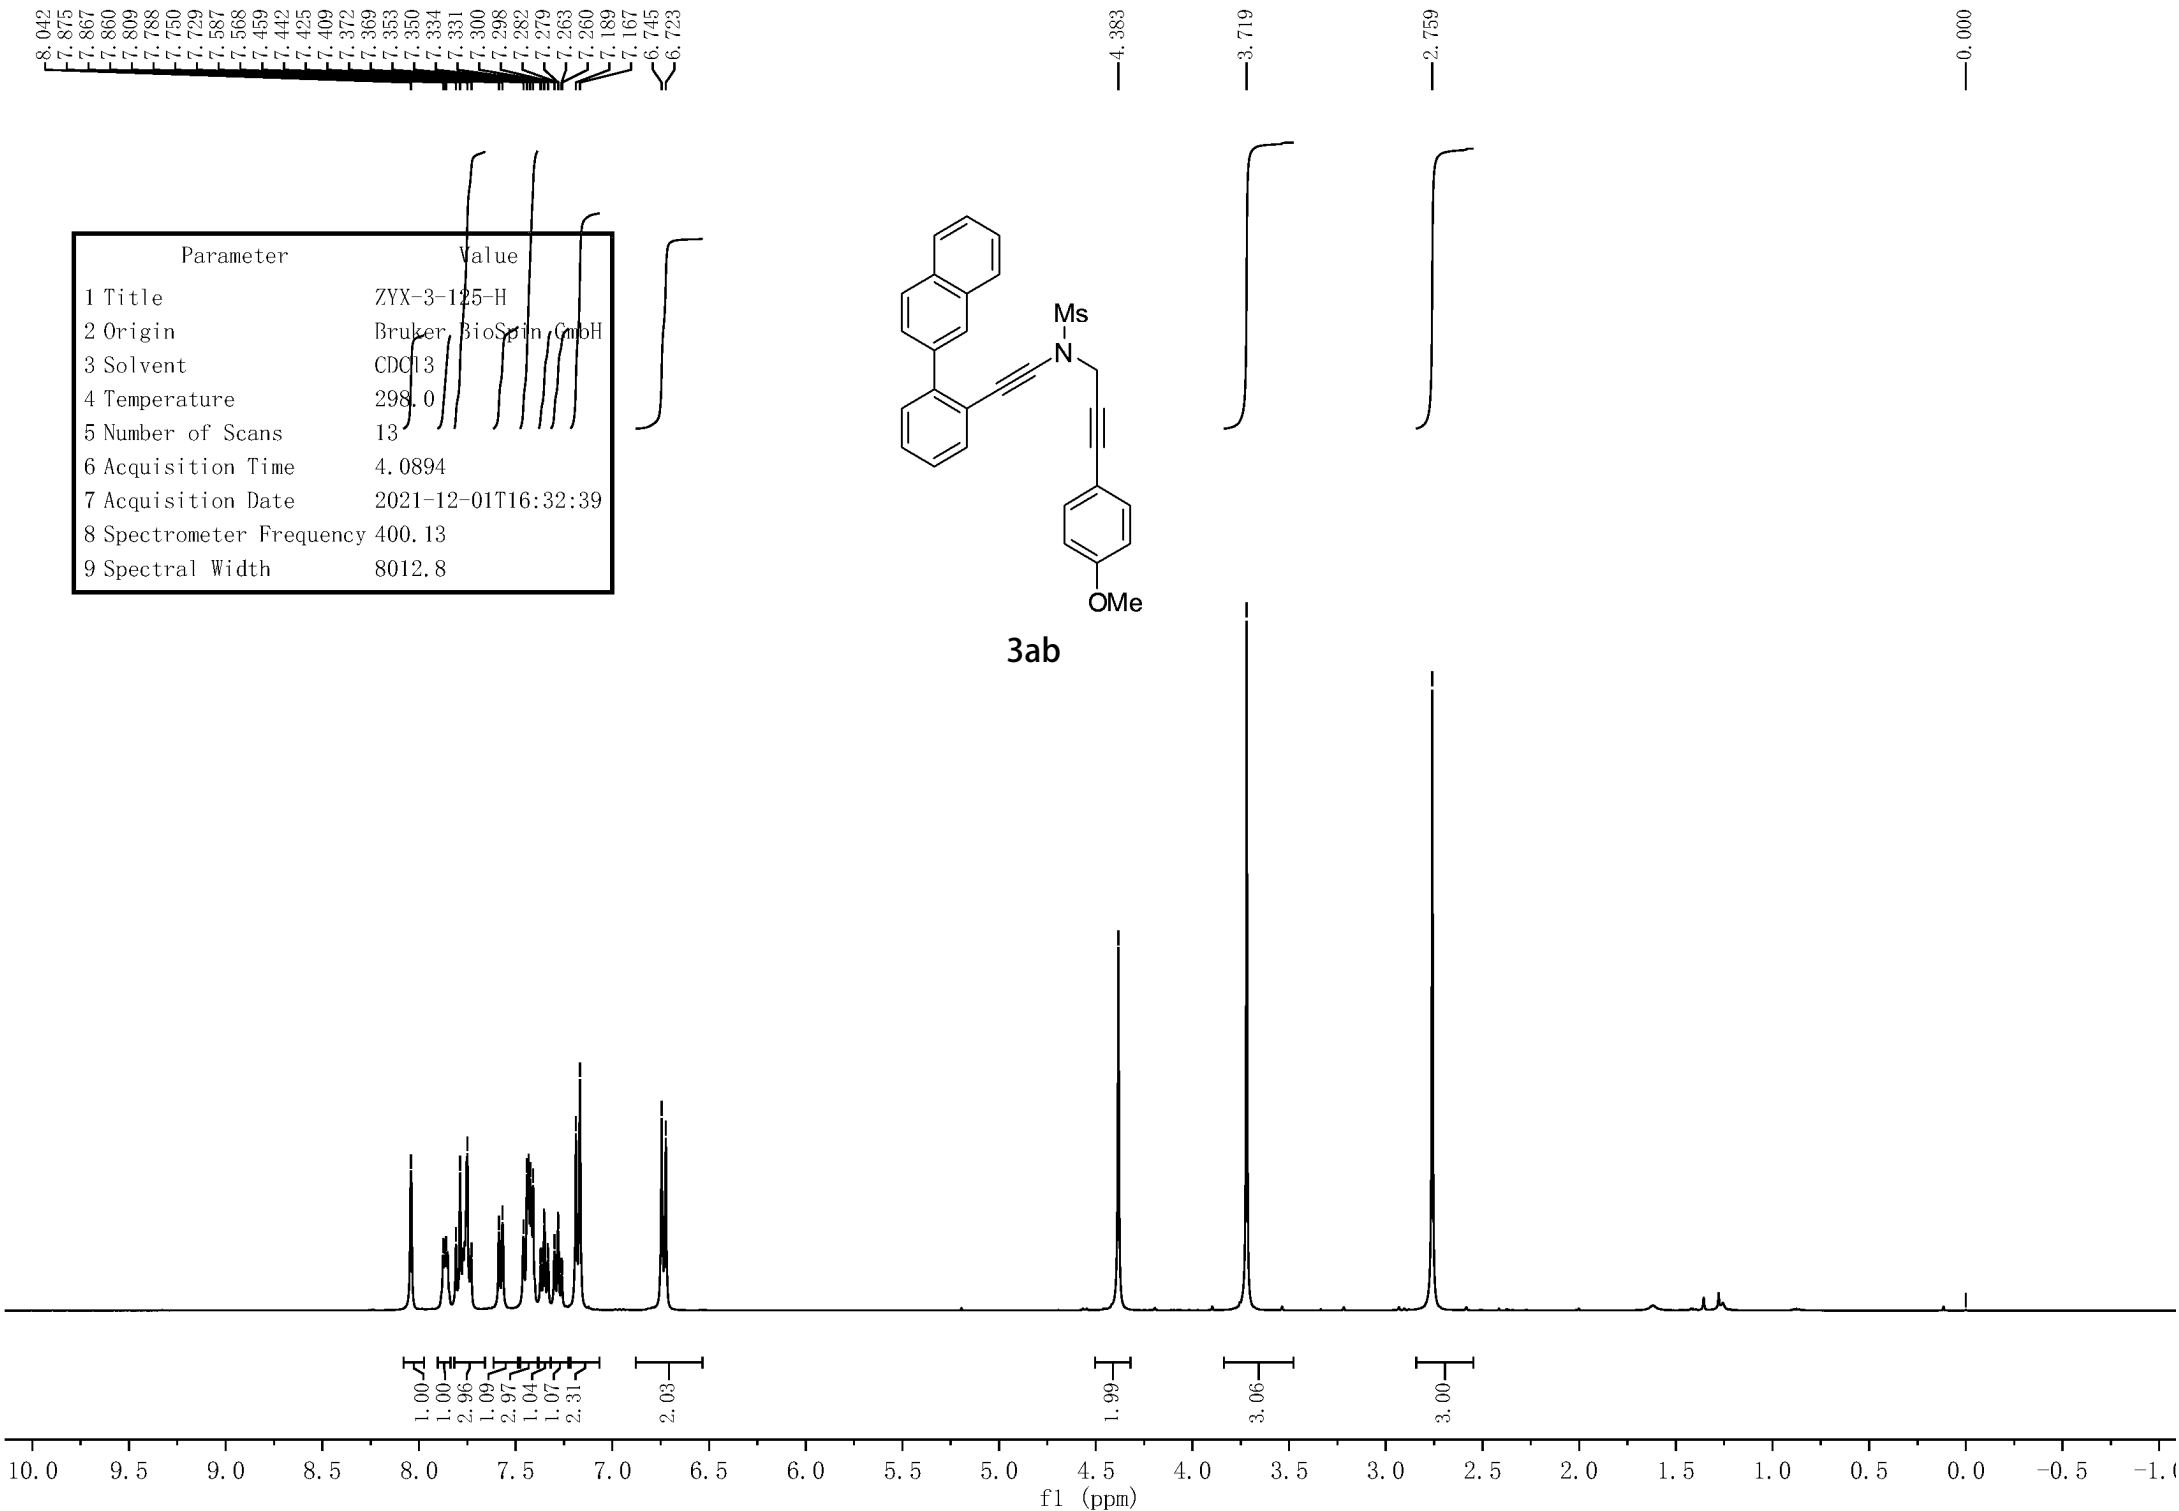

8.042  
7.875  
7.867  
7.860  
7.809  
7.788  
7.750  
7.729  
7.587  
7.568  
7.459  
7.442  
7.425  
7.409  
7.372  
7.369  
7.353  
7.350  
7.334  
7.331  
7.300  
7.298  
7.282  
7.279  
7.263  
7.260  
7.189  
7.167  
6.745  
6.723

| Parameter                | Value                |
|--------------------------|----------------------|
| 1 Title                  | ZYX-3-125-H          |
| 2 Origin                 | Bruker, BioSpin GmbH |
| 3 Solvent                | CDCl3                |
| 4 Temperature            | 298.0                |
| 5 Number of Scans        | 13                   |
| 6 Acquisition Time       | 4.0894               |
| 7 Acquisition Date       | 2021-12-01T16:32:39  |
| 8 Spectrometer Frequency | 400.13               |
| 9 Spectral Width         | 8012.8               |

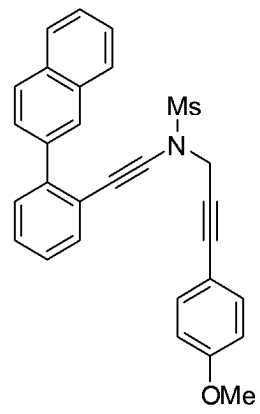

4.383  
3.719  
2.759  
0.000

1.00  
1.00  
2.96  
1.09  
2.97  
1.04  
1.07  
2.31  
2.03  
1.99  
3.06  
3.00

10.0 9.5 9.0 8.5 8.0 7.5 7.0 6.5 6.0 5.5 5.0 4.5 4.0 3.5 3.0 2.5 2.0 1.5 1.0 0.5 0.0 -0.5 -1.0

| Parameter                | Value               |
|--------------------------|---------------------|
| 1 Title                  | ZYX-3-125-C         |
| 2 Origin                 | Bruker BioSpin GmbH |
| 3 Solvent                | CDC13               |
| 4 Temperature            | 300.0               |
| 5 Number of Scans        | 15                  |
| 6 Acquisition Time       | 1.3631              |
| 7 Acquisition Date       | 2021-12-01T16:34:24 |
| 8 Spectrometer Frequency | 100.61              |
| 9 Spectral Width         | 24038.5             |

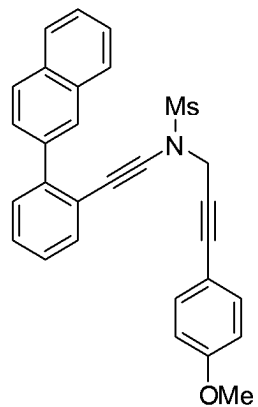

3ab

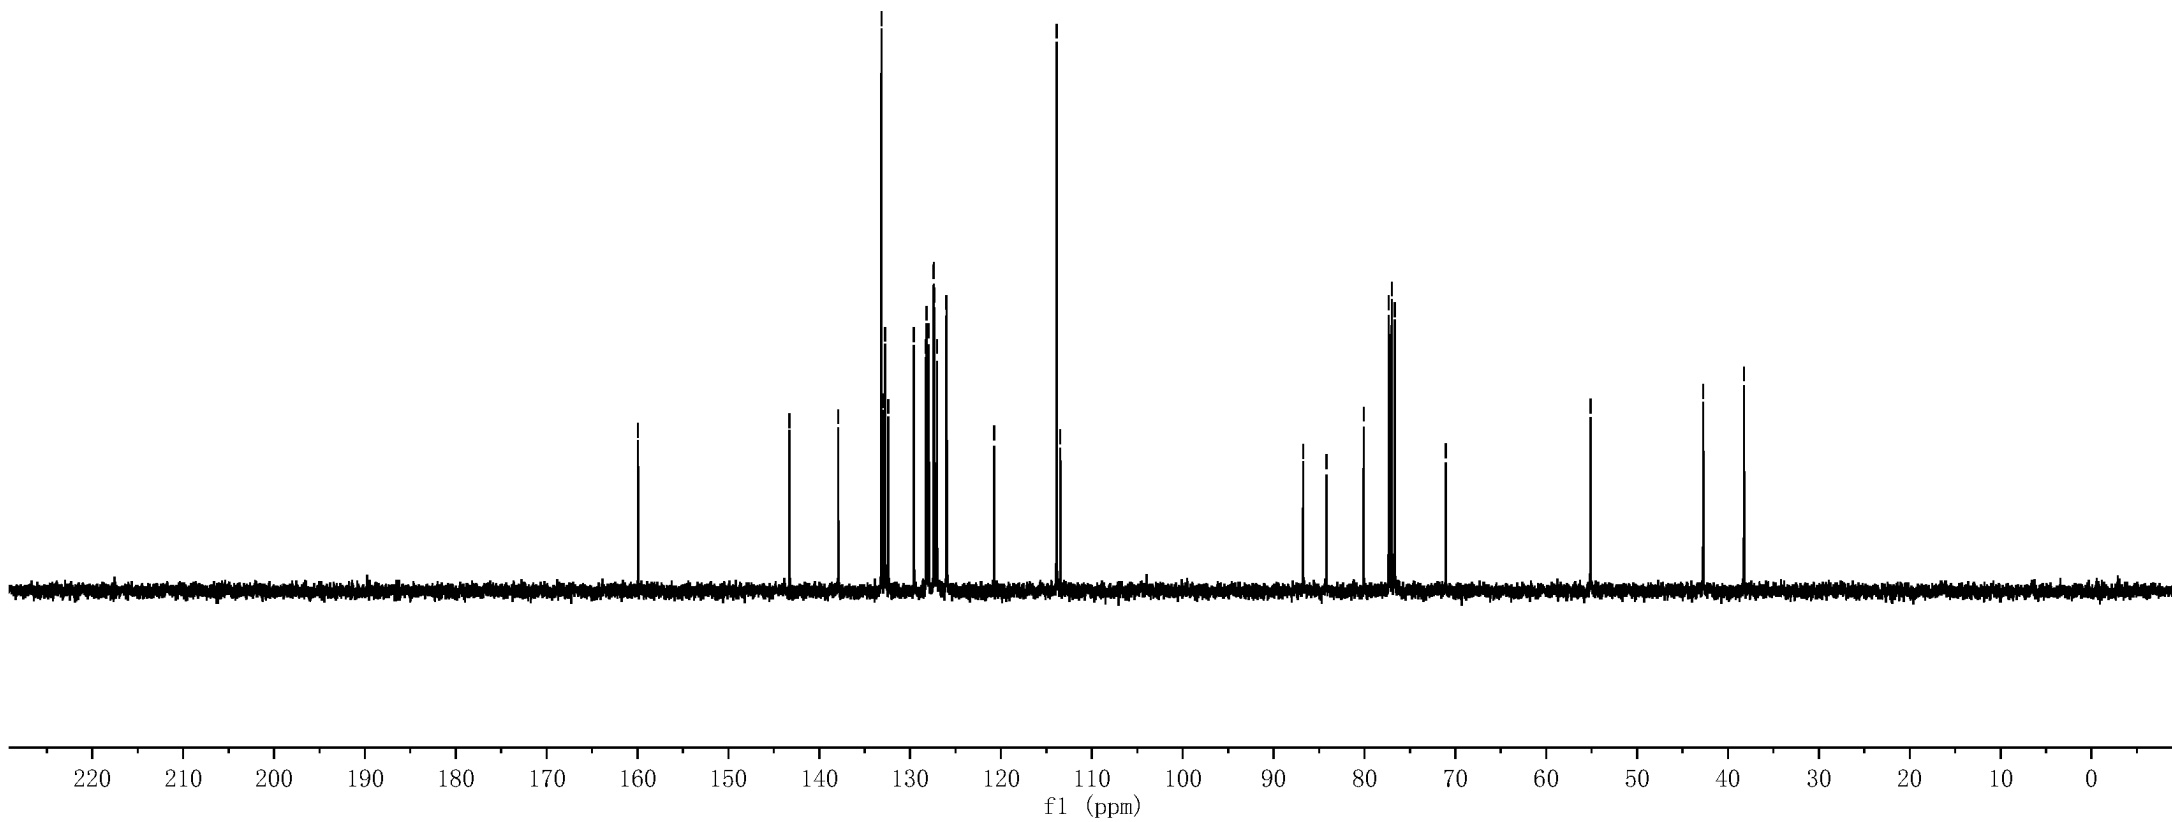

159.94

143.27

133.16

128.18

127.94

127.42

127.40

127.34

126.01

120.76

113.88

113.47

86.75

84.19

80.09

77.32

77.00

76.68

71.05

55.13

42.72

38.23

137.91

133.16

133.03

132.74

132.41

129.58

128.25

128.18

127.94

127.42

127.40

127.34

127.04

126.01

125.97

120.76

f1 (ppm)

f1 (ppm)

| Parameter                | Value               |
|--------------------------|---------------------|
| 1 Title                  | zyx-14-44           |
| 2 Origin                 | Bruker BioSpin GmbH |
| 3 Solvent                | CDCl3               |
| 4 Temperature            | 299.0               |
| 5 Number of Scans        | 6                   |
| 6 Acquisition Time       | 3.1719              |
| 7 Acquisition Date       | 2024-08-12T11:54:38 |
| 8 Spectrometer Frequency | 500.17              |
| 9 Spectral Width         | 10330.6             |

8.365  
 7.970  
 7.957  
 7.953  
 7.756  
 7.738  
 7.729  
 7.724  
 7.417  
 7.405  
 7.205  
 7.189  
 7.171  
 7.147  
 7.136  
 6.492  
 6.474

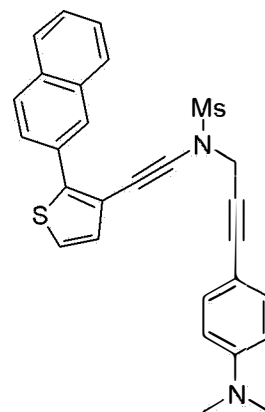

3ac

4.564

3.132

2.896

-0.000

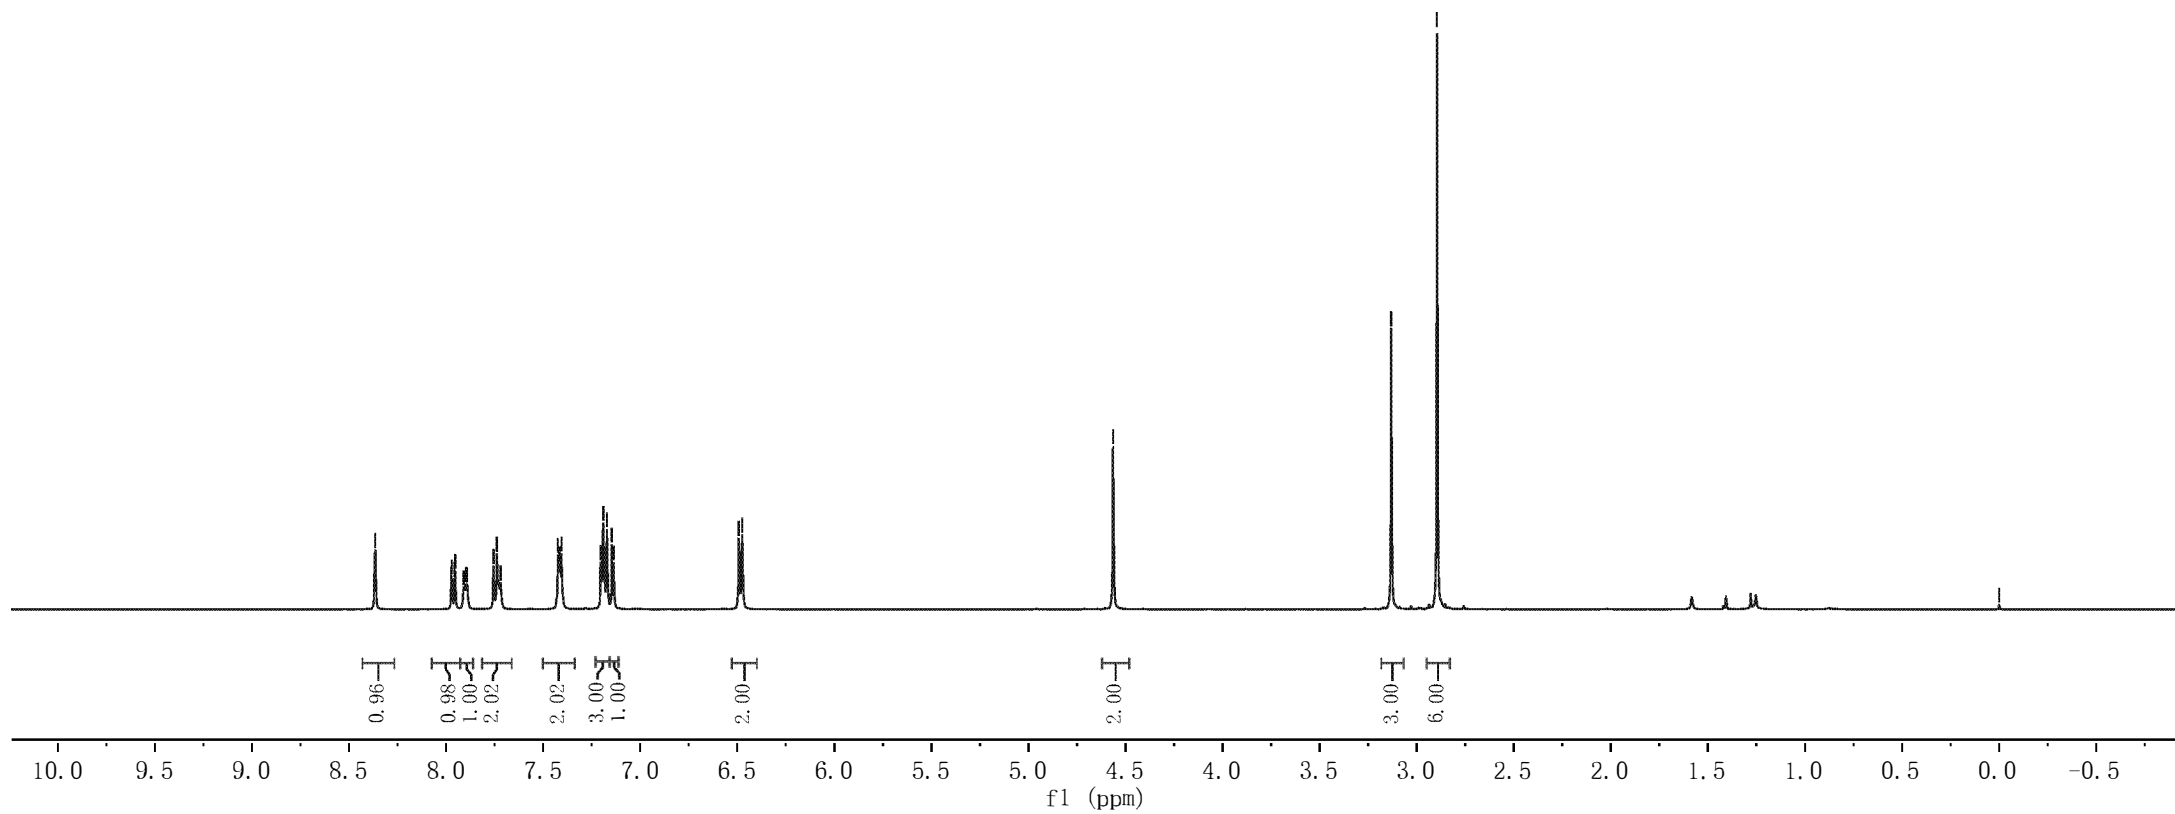

| Parameter                | Value               |
|--------------------------|---------------------|
| 1 Title                  | zyx-14-44           |
| 2 Origin                 | Bruker BioSpin GmbH |
| 3 Solvent                | CDCl3               |
| 4 Temperature            | 298.9               |
| 5 Number of Scans        | 28                  |
| 6 Acquisition Time       | 1.1010              |
| 7 Acquisition Date       | 2024-08-12T11:47:14 |
| 8 Spectrometer Frequency | 125.77              |
| 9 Spectral Width         | 29761.9             |

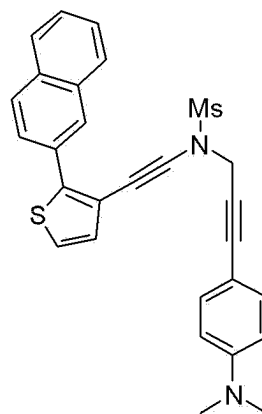

**3ac**

150.41  
145.86  
132.90  
132.76  
131.99  
128.36  
128.17  
127.51  
126.41  
126.36  
126.19  
125.75  
123.90  
111.56  
107.92

88.40  
83.62  
79.23  
77.25  
77.00  
76.75  
67.32

43.31  
39.96  
38.67

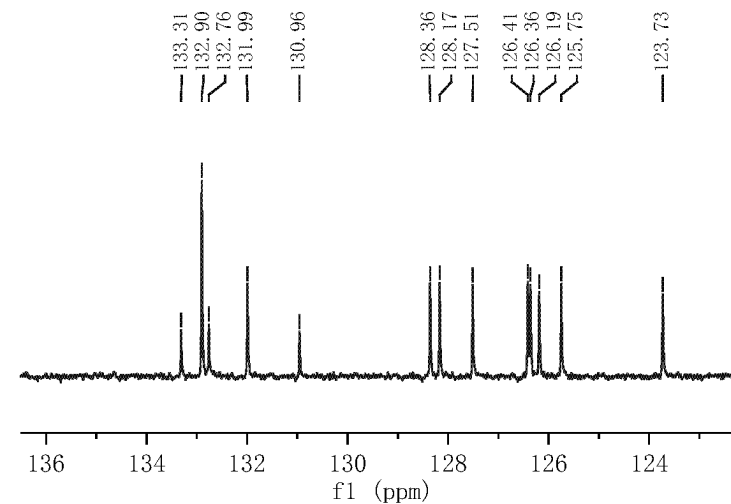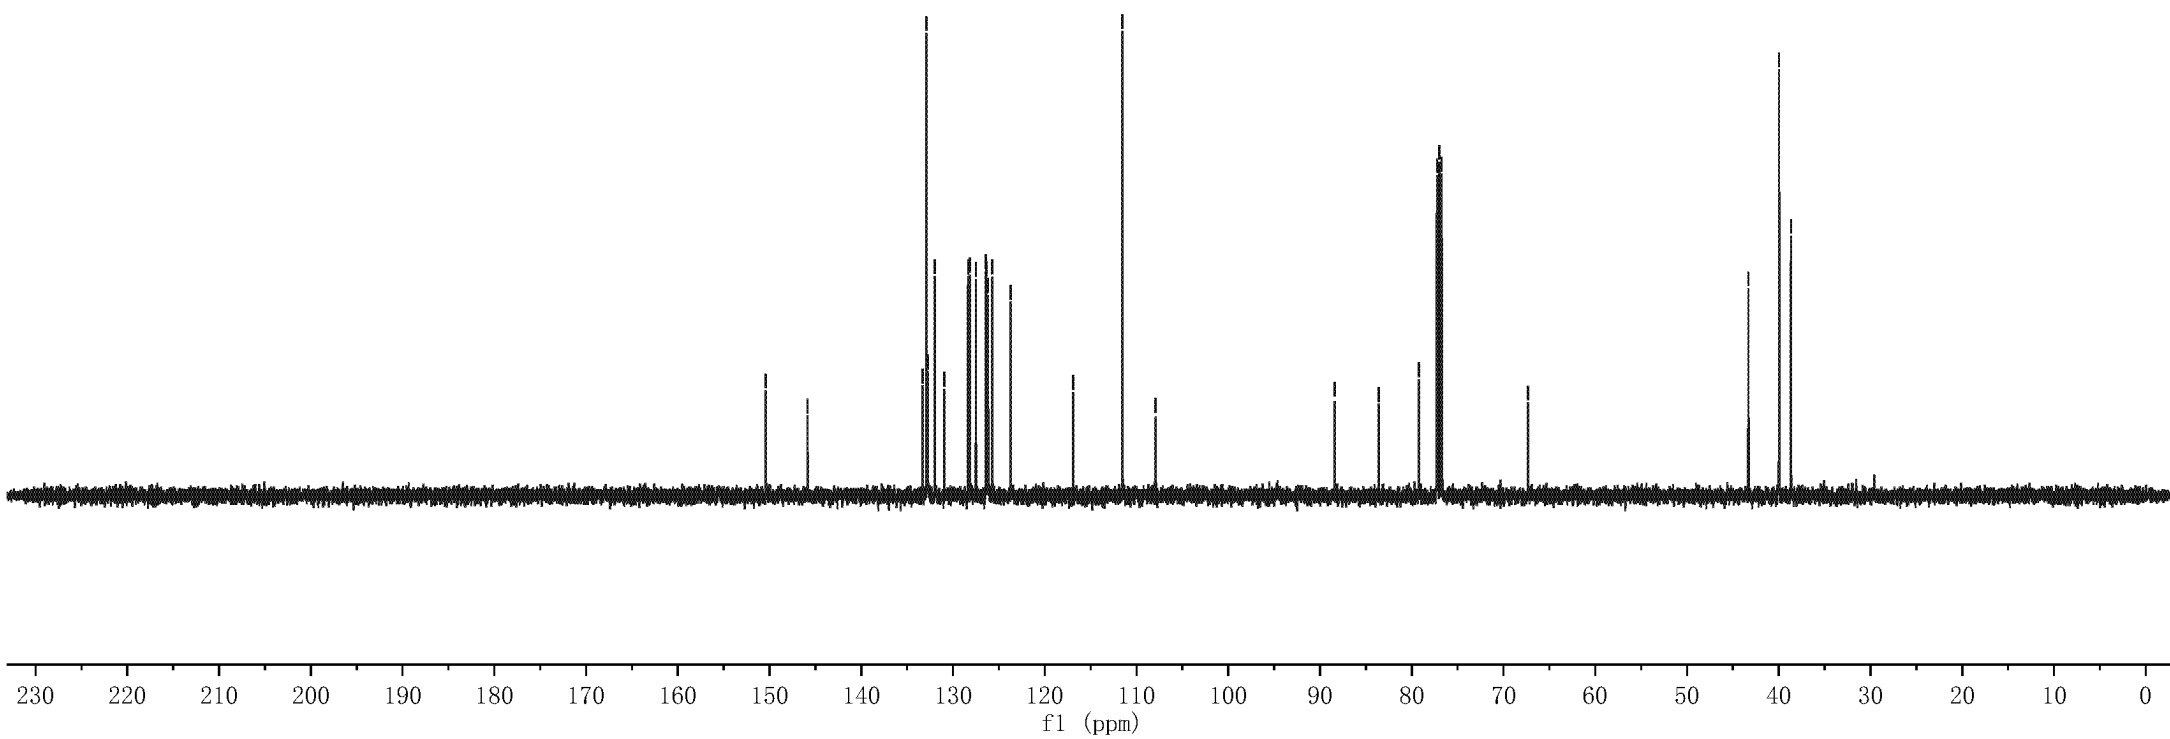

| Parameter                | Value               |
|--------------------------|---------------------|
| 1 Title                  | zyx-14-44           |
| 2 Origin                 | Bruker BioSpin GmbH |
| 3 Solvent                | CDCl3               |
| 4 Temperature            | 299.3               |
| 5 Number of Scans        | 25                  |
| 6 Acquisition Time       | 1.1010              |
| 7 Acquisition Date       | 2024-08-12T11:49:16 |
| 8 Spectrometer Frequency | 125.77              |
| 9 Spectral Width         | 29761.9             |

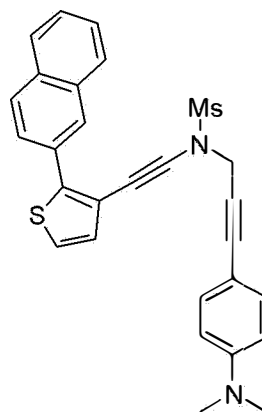

3ac

133.07  
132.16  
128.53  
128.34  
127.68  
126.58  
126.53  
126.36  
125.92  
123.90  
111.73

43.48  
40.13  
38.84

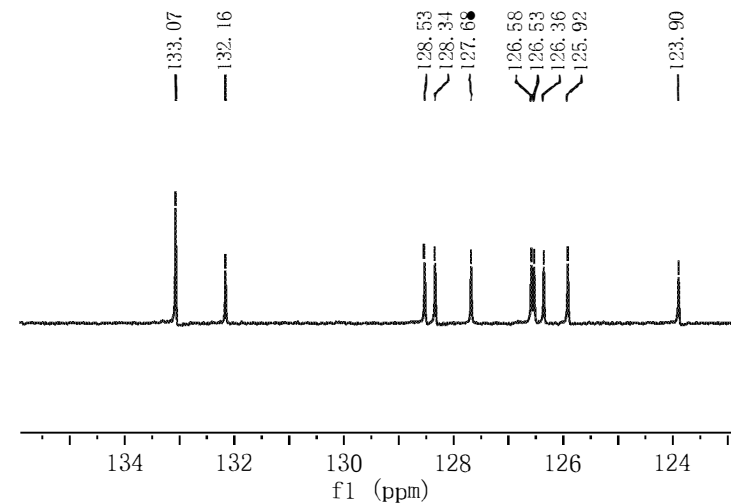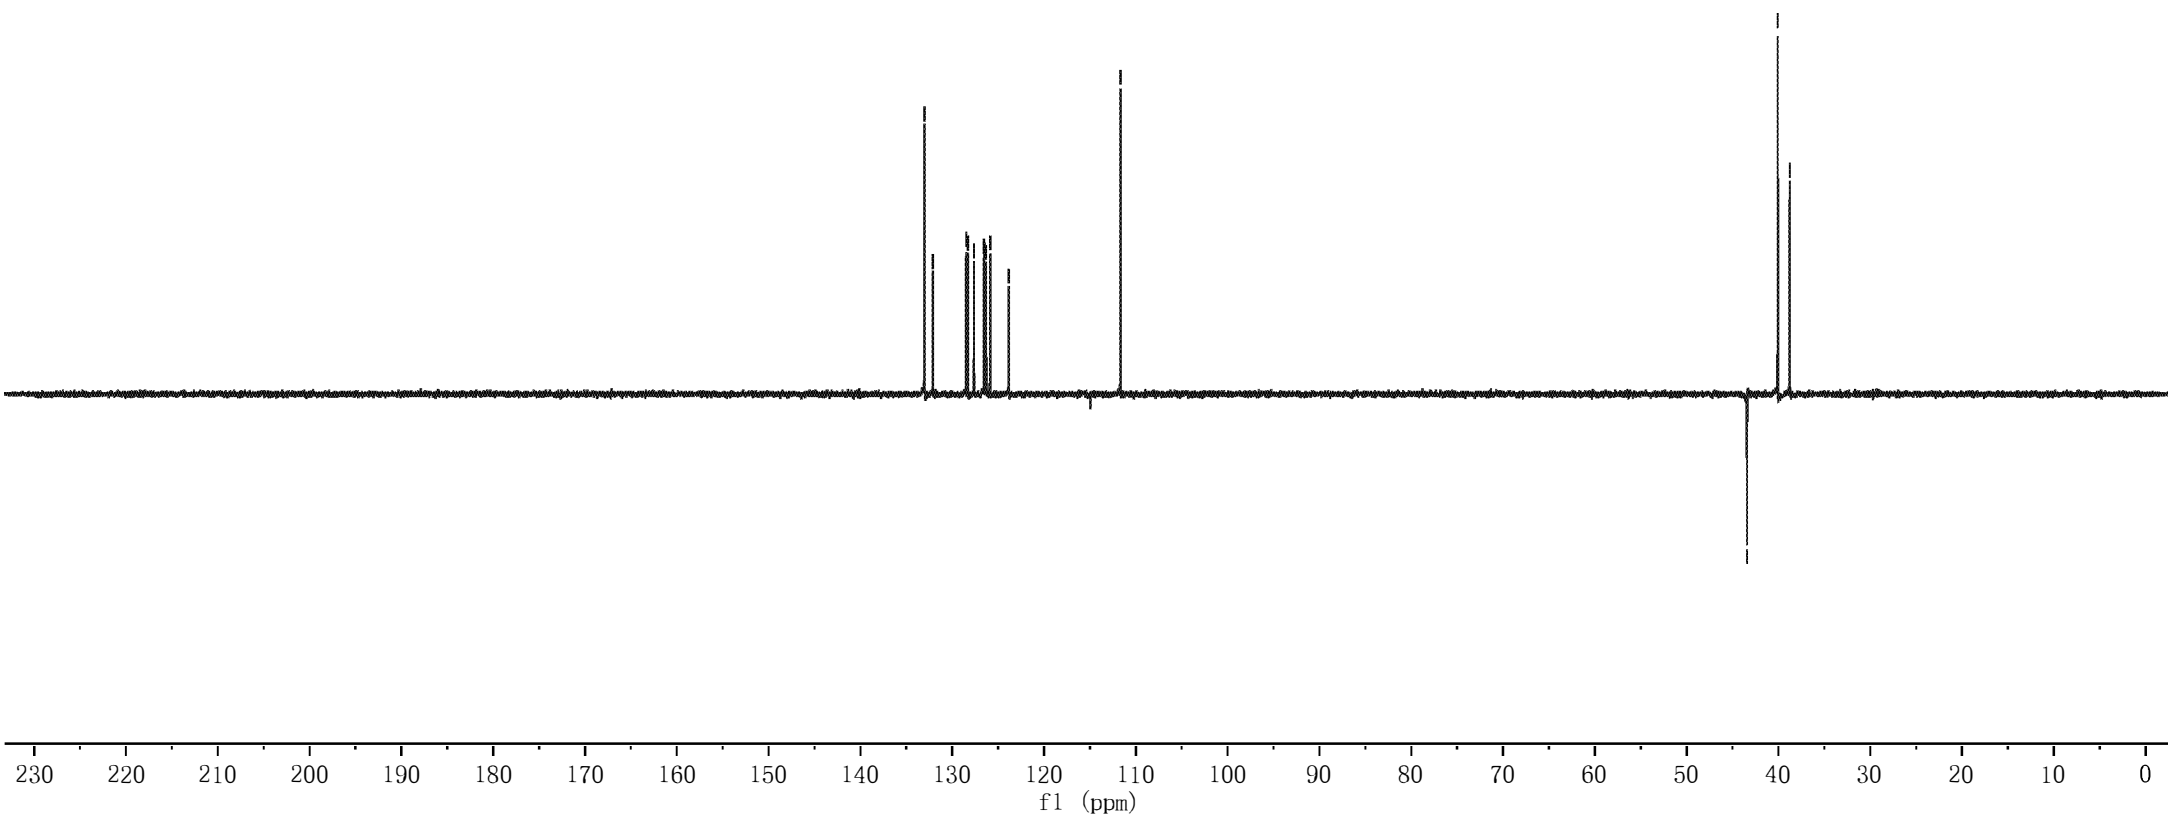

| Parameter                | Value               |
|--------------------------|---------------------|
| 1 Title                  | zyx-14-35-h         |
| 2 Origin                 | Bruker BioSpin GmbH |
| 3 Solvent                | CDCl <sub>3</sub>   |
| 4 Temperature            | 298.3               |
| 5 Number of Scans        | 11                  |
| 6 Acquisition Time       | 3.1719              |
| 7 Acquisition Date       | 2024-08-10T09:17:22 |
| 8 Spectrometer Frequency | 500.17              |
| 9 Spectral Width         | 10330.6             |

8.191  
7.798  
7.795  
7.772  
7.755  
7.587  
7.580  
7.423  
7.413  
7.405  
7.362  
7.355  
7.164  
6.506  
6.482

4.507

3.004  
2.912

0.000

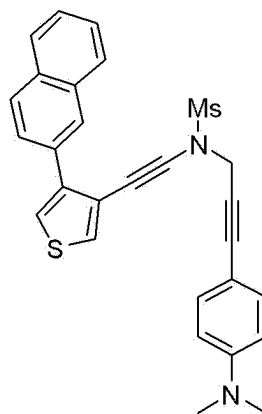

3ad

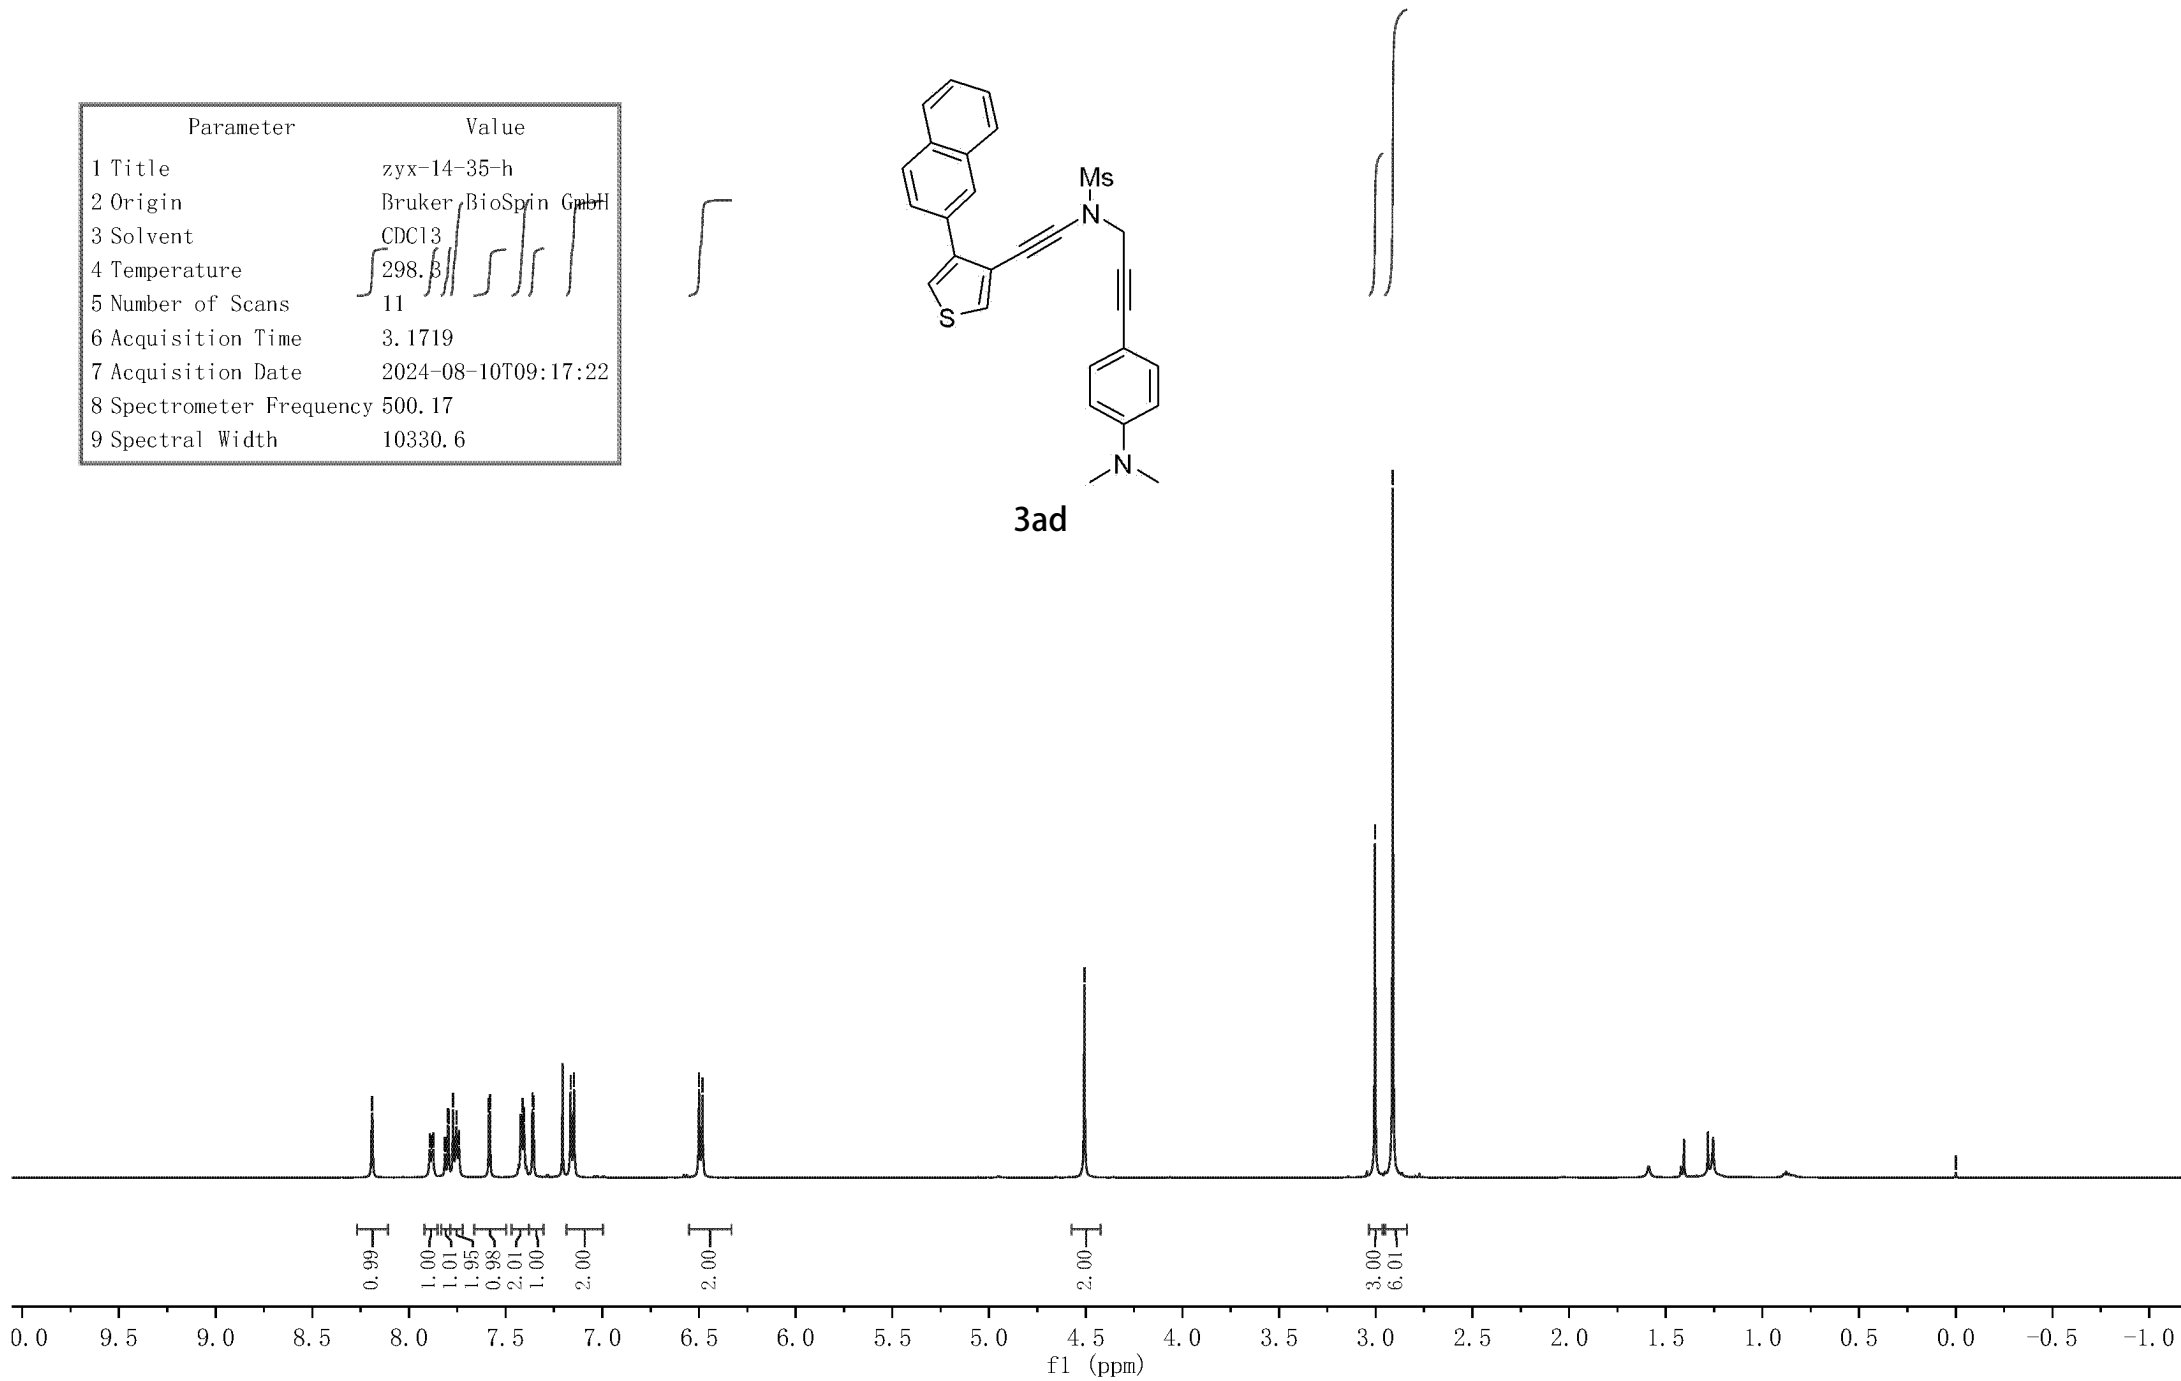

| Parameter                | Value               |
|--------------------------|---------------------|
| 1 Title                  | zyx-14-35-c         |
| 2 Origin                 | Bruker BioSpin GmbH |
| 3 Solvent                | CDCl3               |
| 4 Temperature            | 298.5               |
| 5 Number of Scans        | 40                  |
| 6 Acquisition Time       | 1.1010              |
| 7 Acquisition Date       | 2024-08-10T09:20:50 |
| 8 Spectrometer Frequency | 125.77              |
| 9 Spectral Width         | 29761.9             |

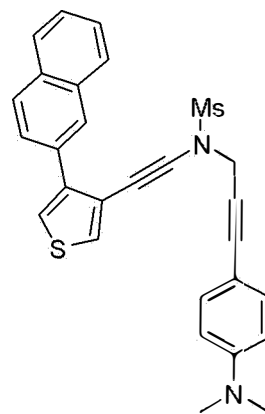

3ad

150.41  
143.38  
133.30  
132.90  
132.68  
130.73  
128.24  
127.80  
127.52  
126.77  
126.43  
126.12  
125.88  
124.88  
107.98

88.29  
83.08  
79.24  
77.25  
77.00  
76.75

66.55

43.26  
40.00  
38.61

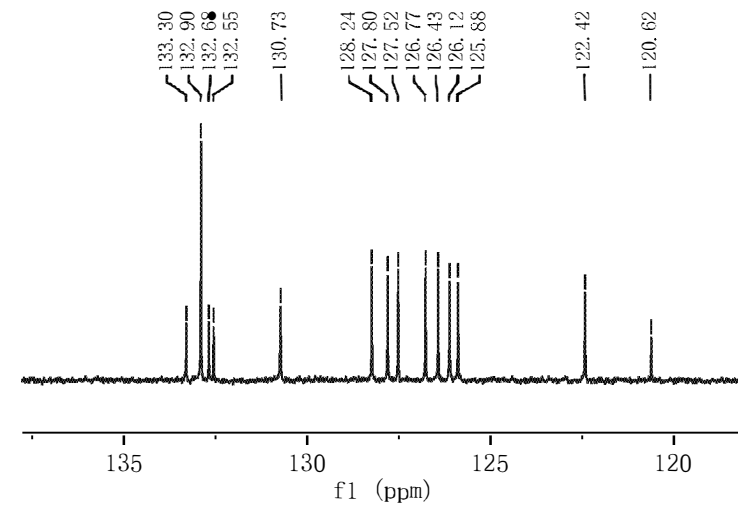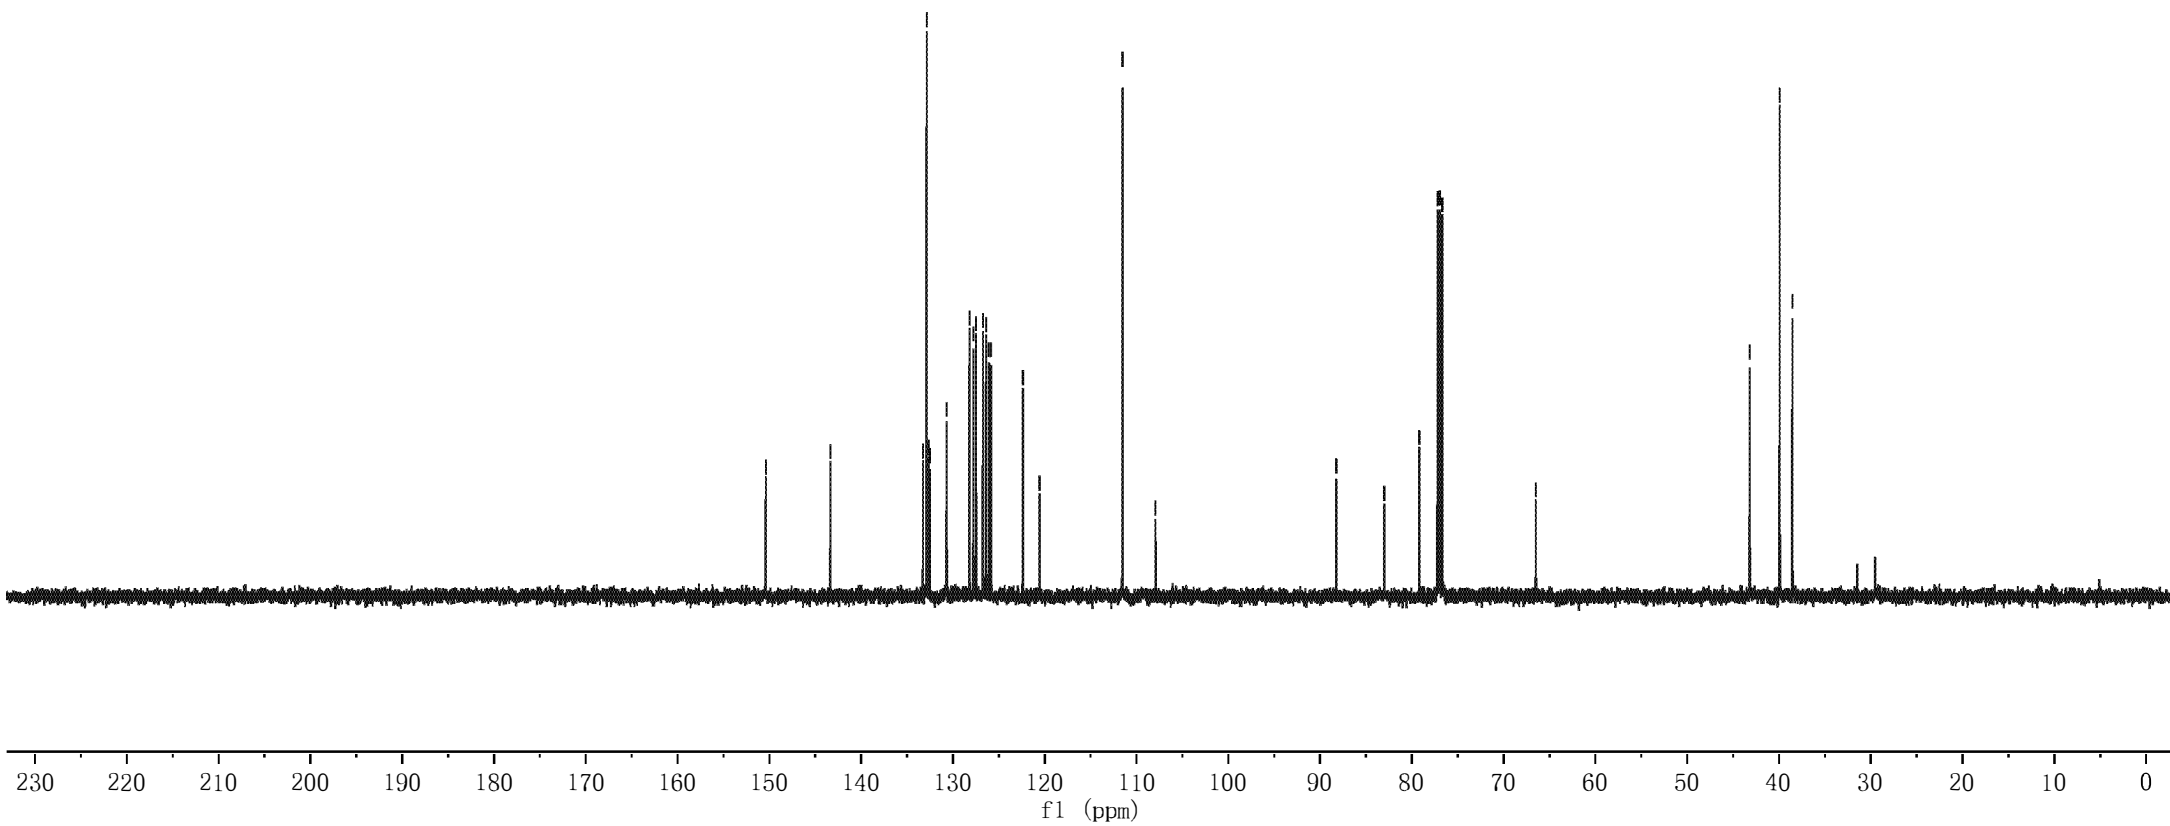



| Parameter                | Value               |
|--------------------------|---------------------|
| 1 Title                  | zyx-14-35-dept      |
| 2 Origin                 | Bruker BioSpin GmbH |
| 3 Solvent                | CDCl3               |
| 4 Temperature            | 298.7               |
| 5 Number of Scans        | 23                  |
| 6 Acquisition Time       | 1.1010              |
| 7 Acquisition Date       | 2024-08-10T09:24:03 |
| 8 Spectrometer Frequency | 125.77              |
| 9 Spectral Width         | 29761.9             |

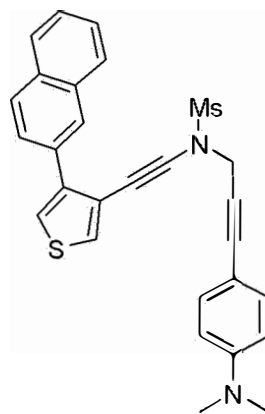

3ad

132.89  
130.73  
128.23  
127.80  
127.51  
126.77  
126.42  
126.11  
125.88  
122.42  
111.57

77.20  
43.26  
40.00  
38.61

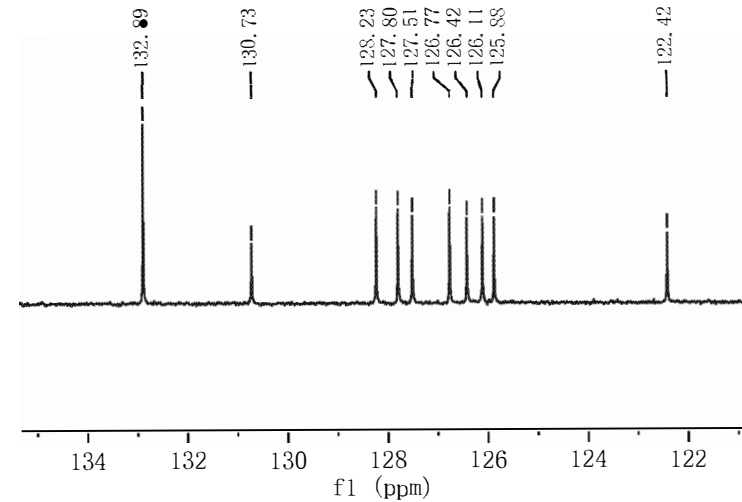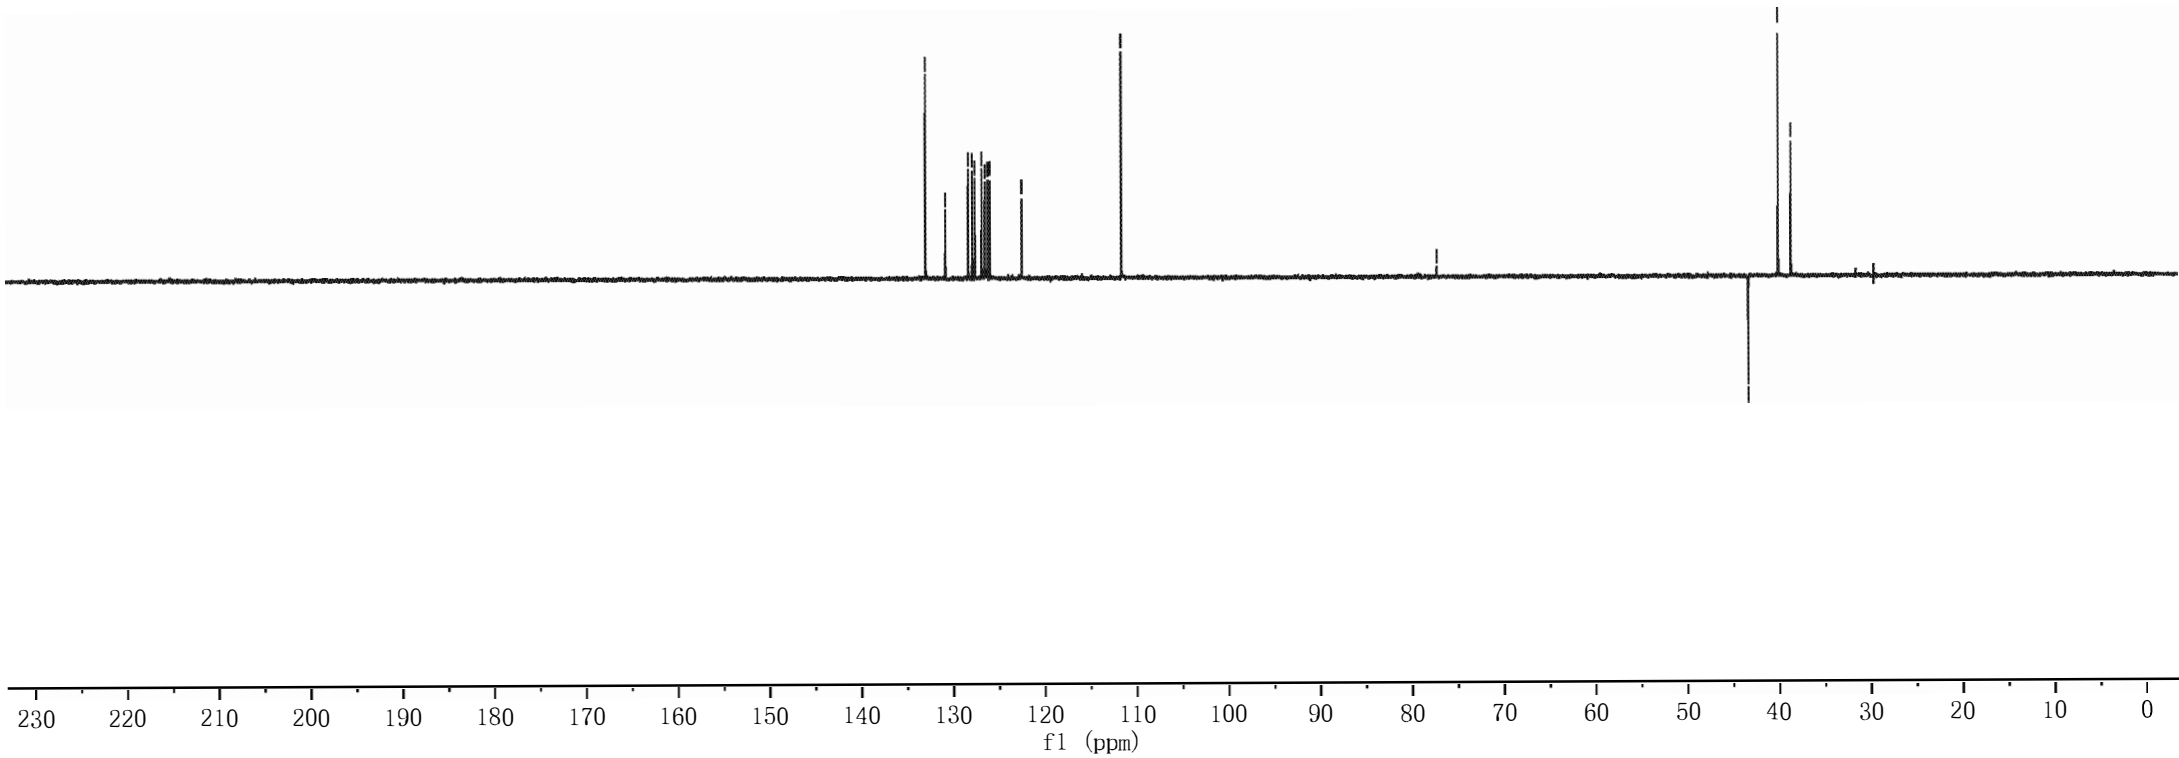

| Parameter                | Value               |
|--------------------------|---------------------|
| 1 Title                  | zyx-13-224-h        |
| 2 Origin                 | Bruker BioSpin GmbH |
| 3 Solvent                | CDCl3               |
| 4 Temperature            | 298.1               |
| 5 Number of Scans        | 6                   |
| 6 Acquisition Time       | 3.1719              |
| 7 Acquisition Date       | 2024-07-18T15:46:03 |
| 8 Spectrometer Frequency | 500.17              |
| 9 Spectral Width         | 10330.6             |

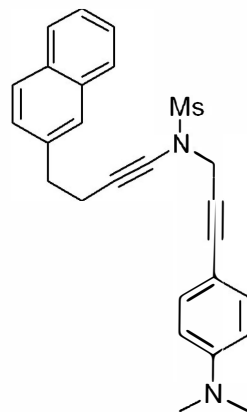

3ae

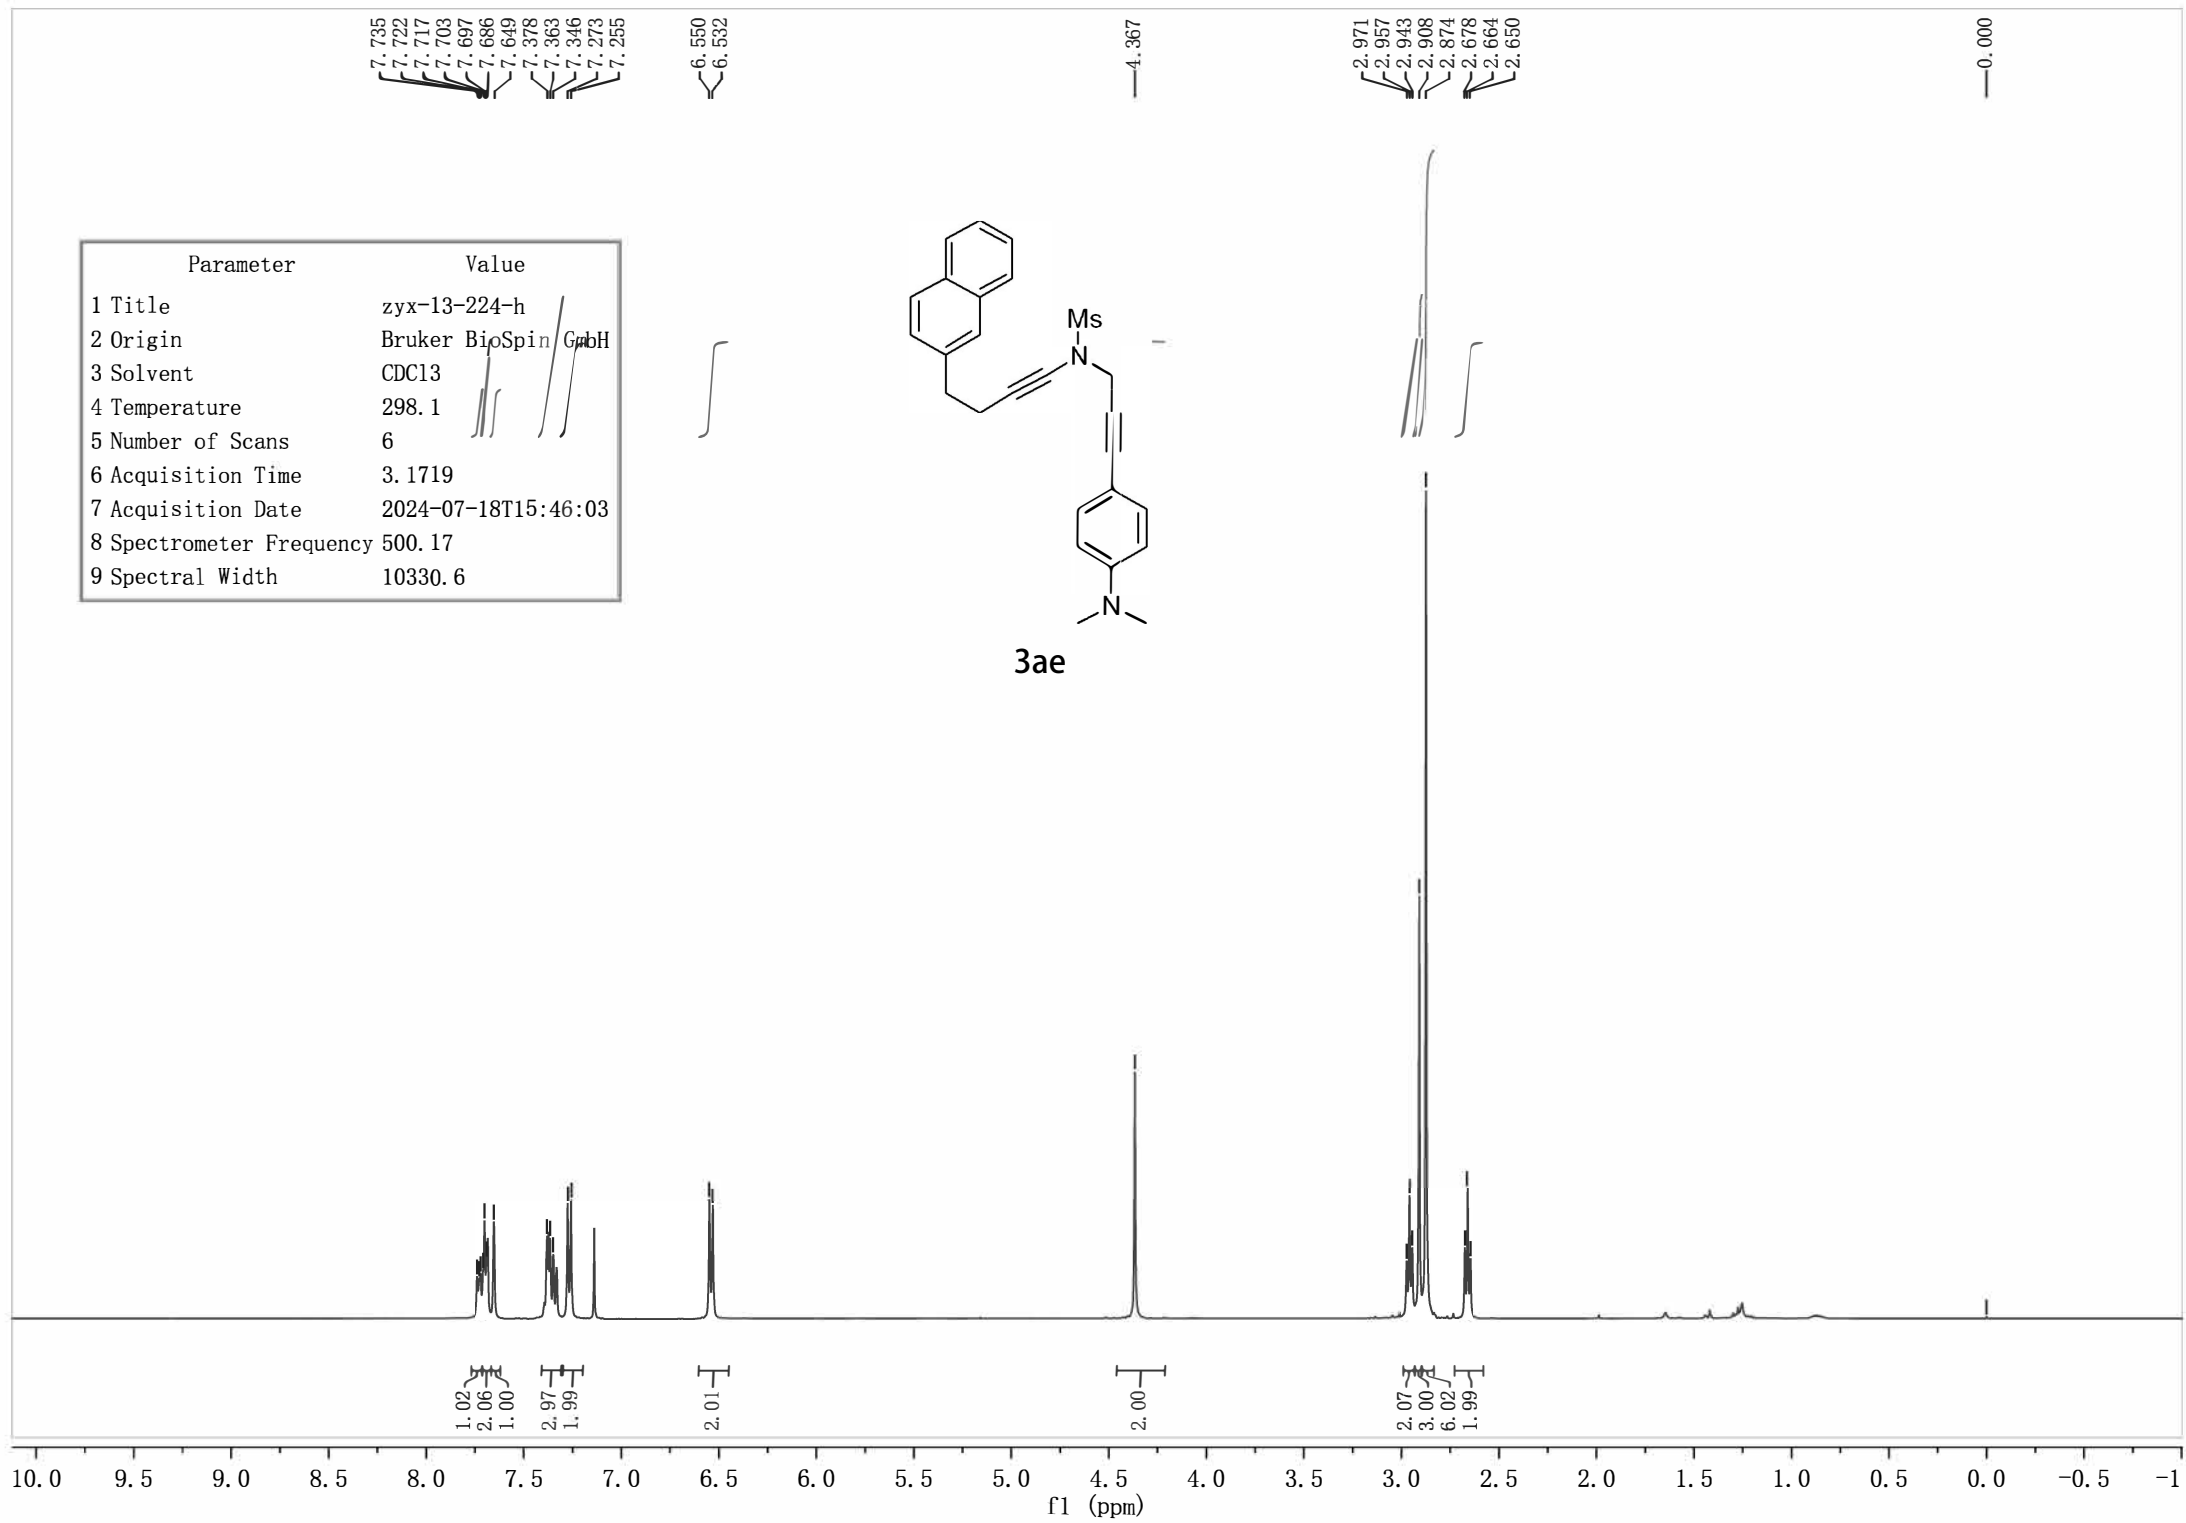

| Parameter                | Value               |
|--------------------------|---------------------|
| 1 Title                  | zyx-13-224-c        |
| 2 Origin                 | Bruker BioSpin GmbH |
| 3 Solvent                | CDCl3               |
| 4 Temperature            | 298.2               |
| 5 Number of Scans        | 9                   |
| 6 Acquisition Time       | 1.1010              |
| 7 Acquisition Date       | 2024-07-18T15:47:13 |
| 8 Spectrometer Frequency | 125.77              |
| 9 Spectral Width         | 29761.9             |

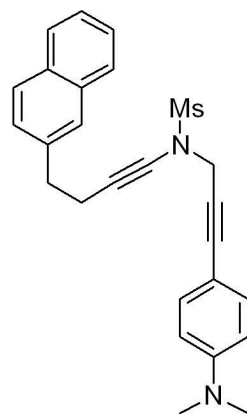

3ae

150.25  
 137.79  
 133.28  
 132.75  
 131.92  
 127.67  
 127.35  
 127.30  
 127.02  
 126.68  
 125.71  
 125.09  
 111.47  
 107.97

87.80  
 79.30  
 77.25  
 77.00  
 76.74  
 73.61  
 69.93

42.95  
 39.79  
 37.57  
 35.00

20.40

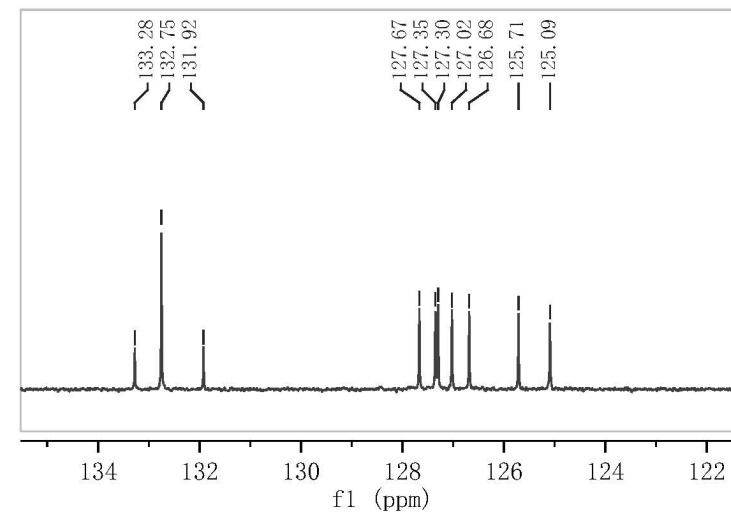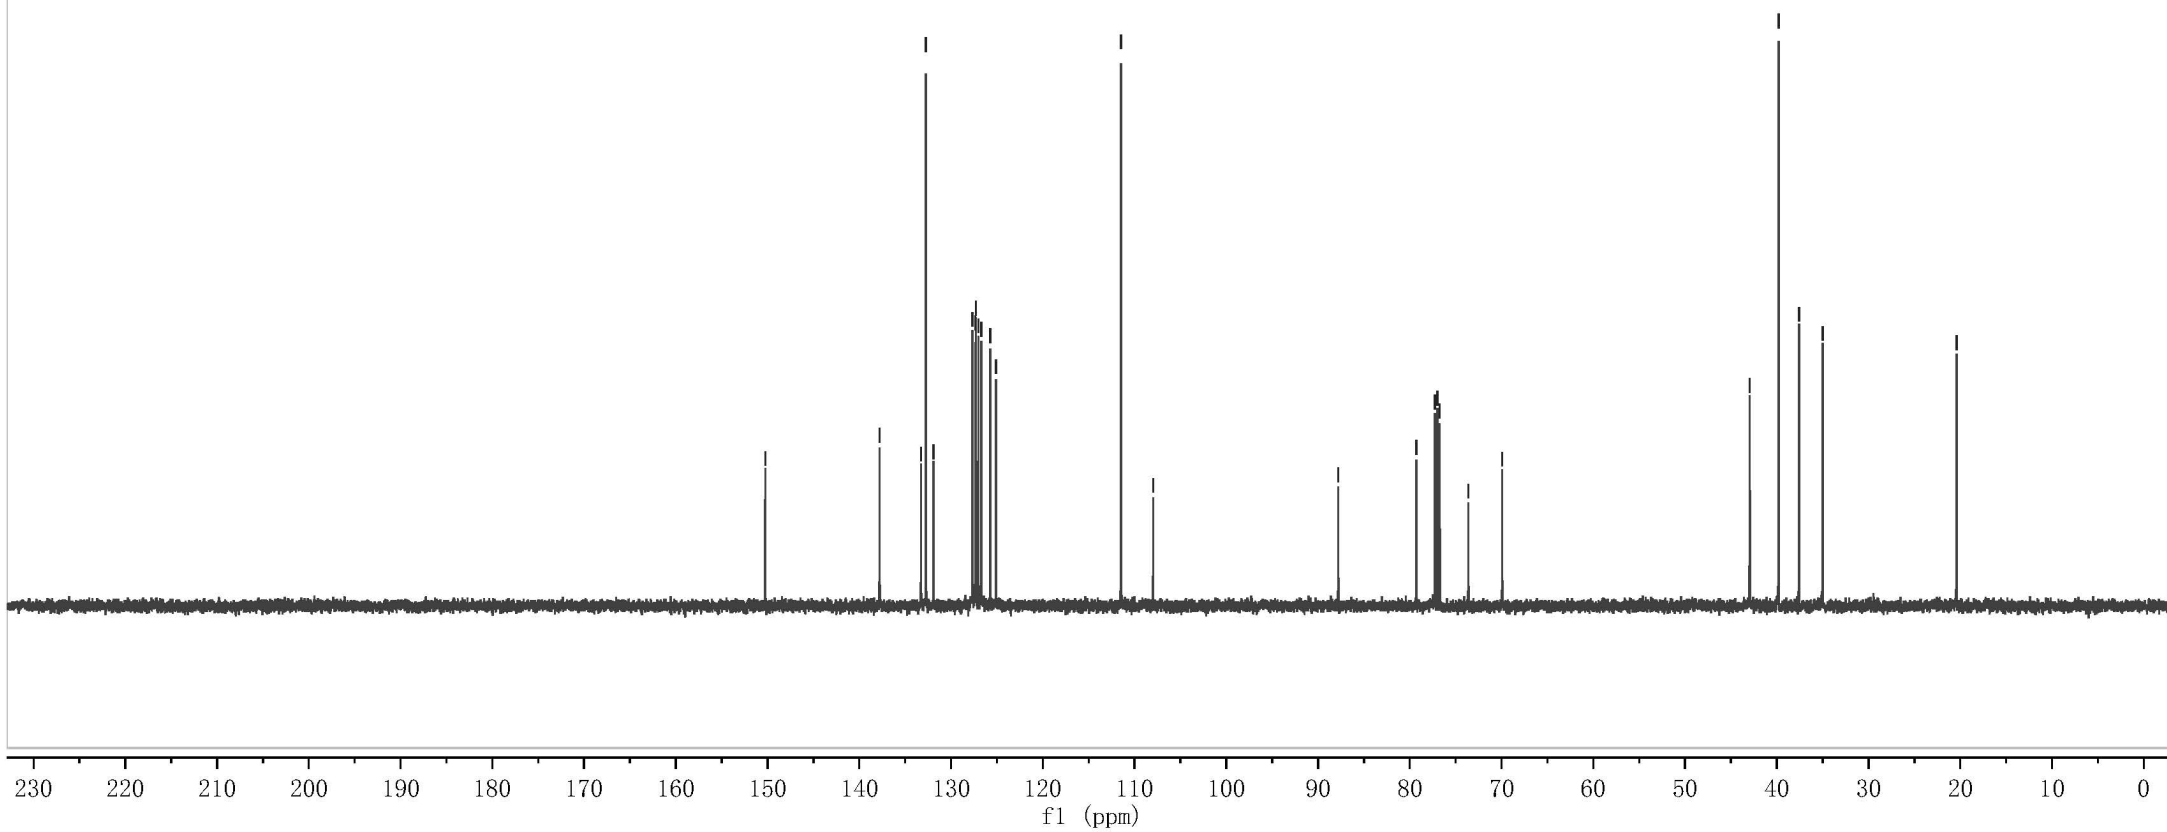

132.75  
127.67  
127.35  
127.30  
127.03  
126.69  
125.71  
125.09  
111.47

42.95  
39.79  
37.57  
35.00  
20.40

| Parameter                | Value               |
|--------------------------|---------------------|
| 1 Title                  | zyx-13-224-dept     |
| 2 Origin                 | Bruker BioSpin GmbH |
| 3 Solvent                | CDCl3               |
| 4 Temperature            | 298.3               |
| 5 Number of Scans        | 11                  |
| 6 Acquisition Time       | 1.1010              |
| 7 Acquisition Date       | 2024-07-18T15:48:24 |
| 8 Spectrometer Frequency | 125.77              |
| 9 Spectral Width         | 29761.9             |

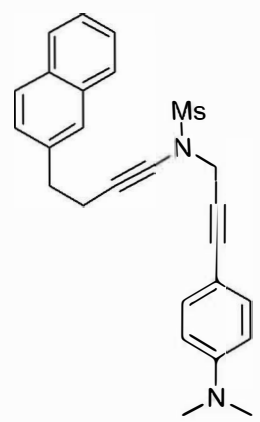

3ae

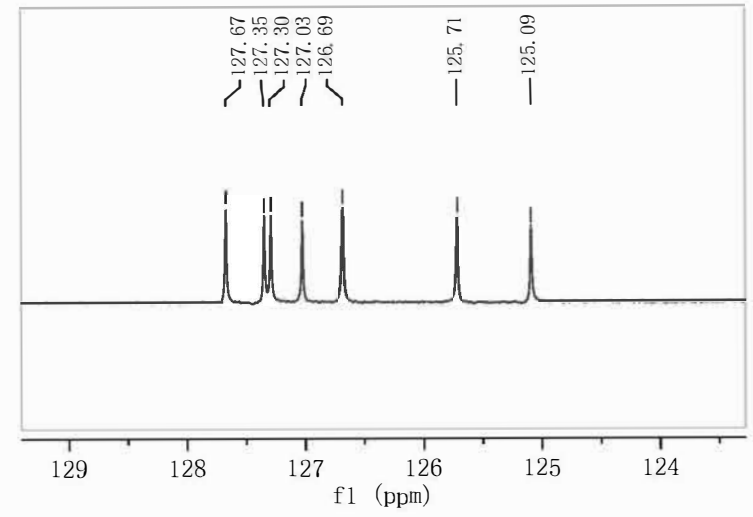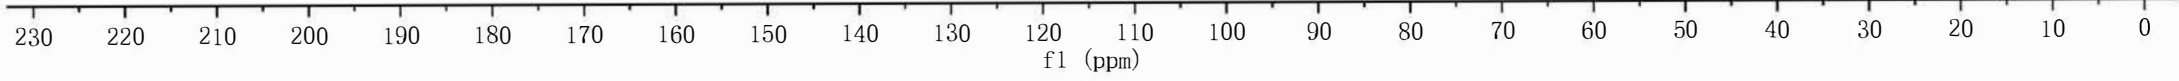

7.641  
7.622  
7.618  
7.599  
7.595  
7.580  
7.577  
7.396  
7.391  
7.295  
7.292  
7.277  
7.274  
7.259  
7.232  
7.217  
7.213  
6.918  
6.896  
6.872  
6.851  
6.721  
6.715  
6.622  
6.619  
6.602  
6.599  
6.550  
6.527  
6.458  
6.436

4.792  
4.769

3.085  
2.852

0.000

| Parameter                | Value               |
|--------------------------|---------------------|
| 1 Title                  | ZYX-4-192-H         |
| 2 Origin                 | Bruker BioSpin GmbH |
| 3 Solvent                | CDCl3               |
| 4 Temperature            | 295.1               |
| 5 Number of Scans        | 8                   |
| 6 Acquisition Time       | 3.9846              |
| 7 Acquisition Date       | 2022-04-13T08:53:26 |
| 8 Spectrometer Frequency | 399.93              |
| 9 Spectral Width         | 8223.7              |

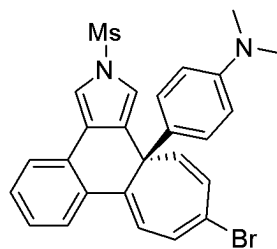

2a

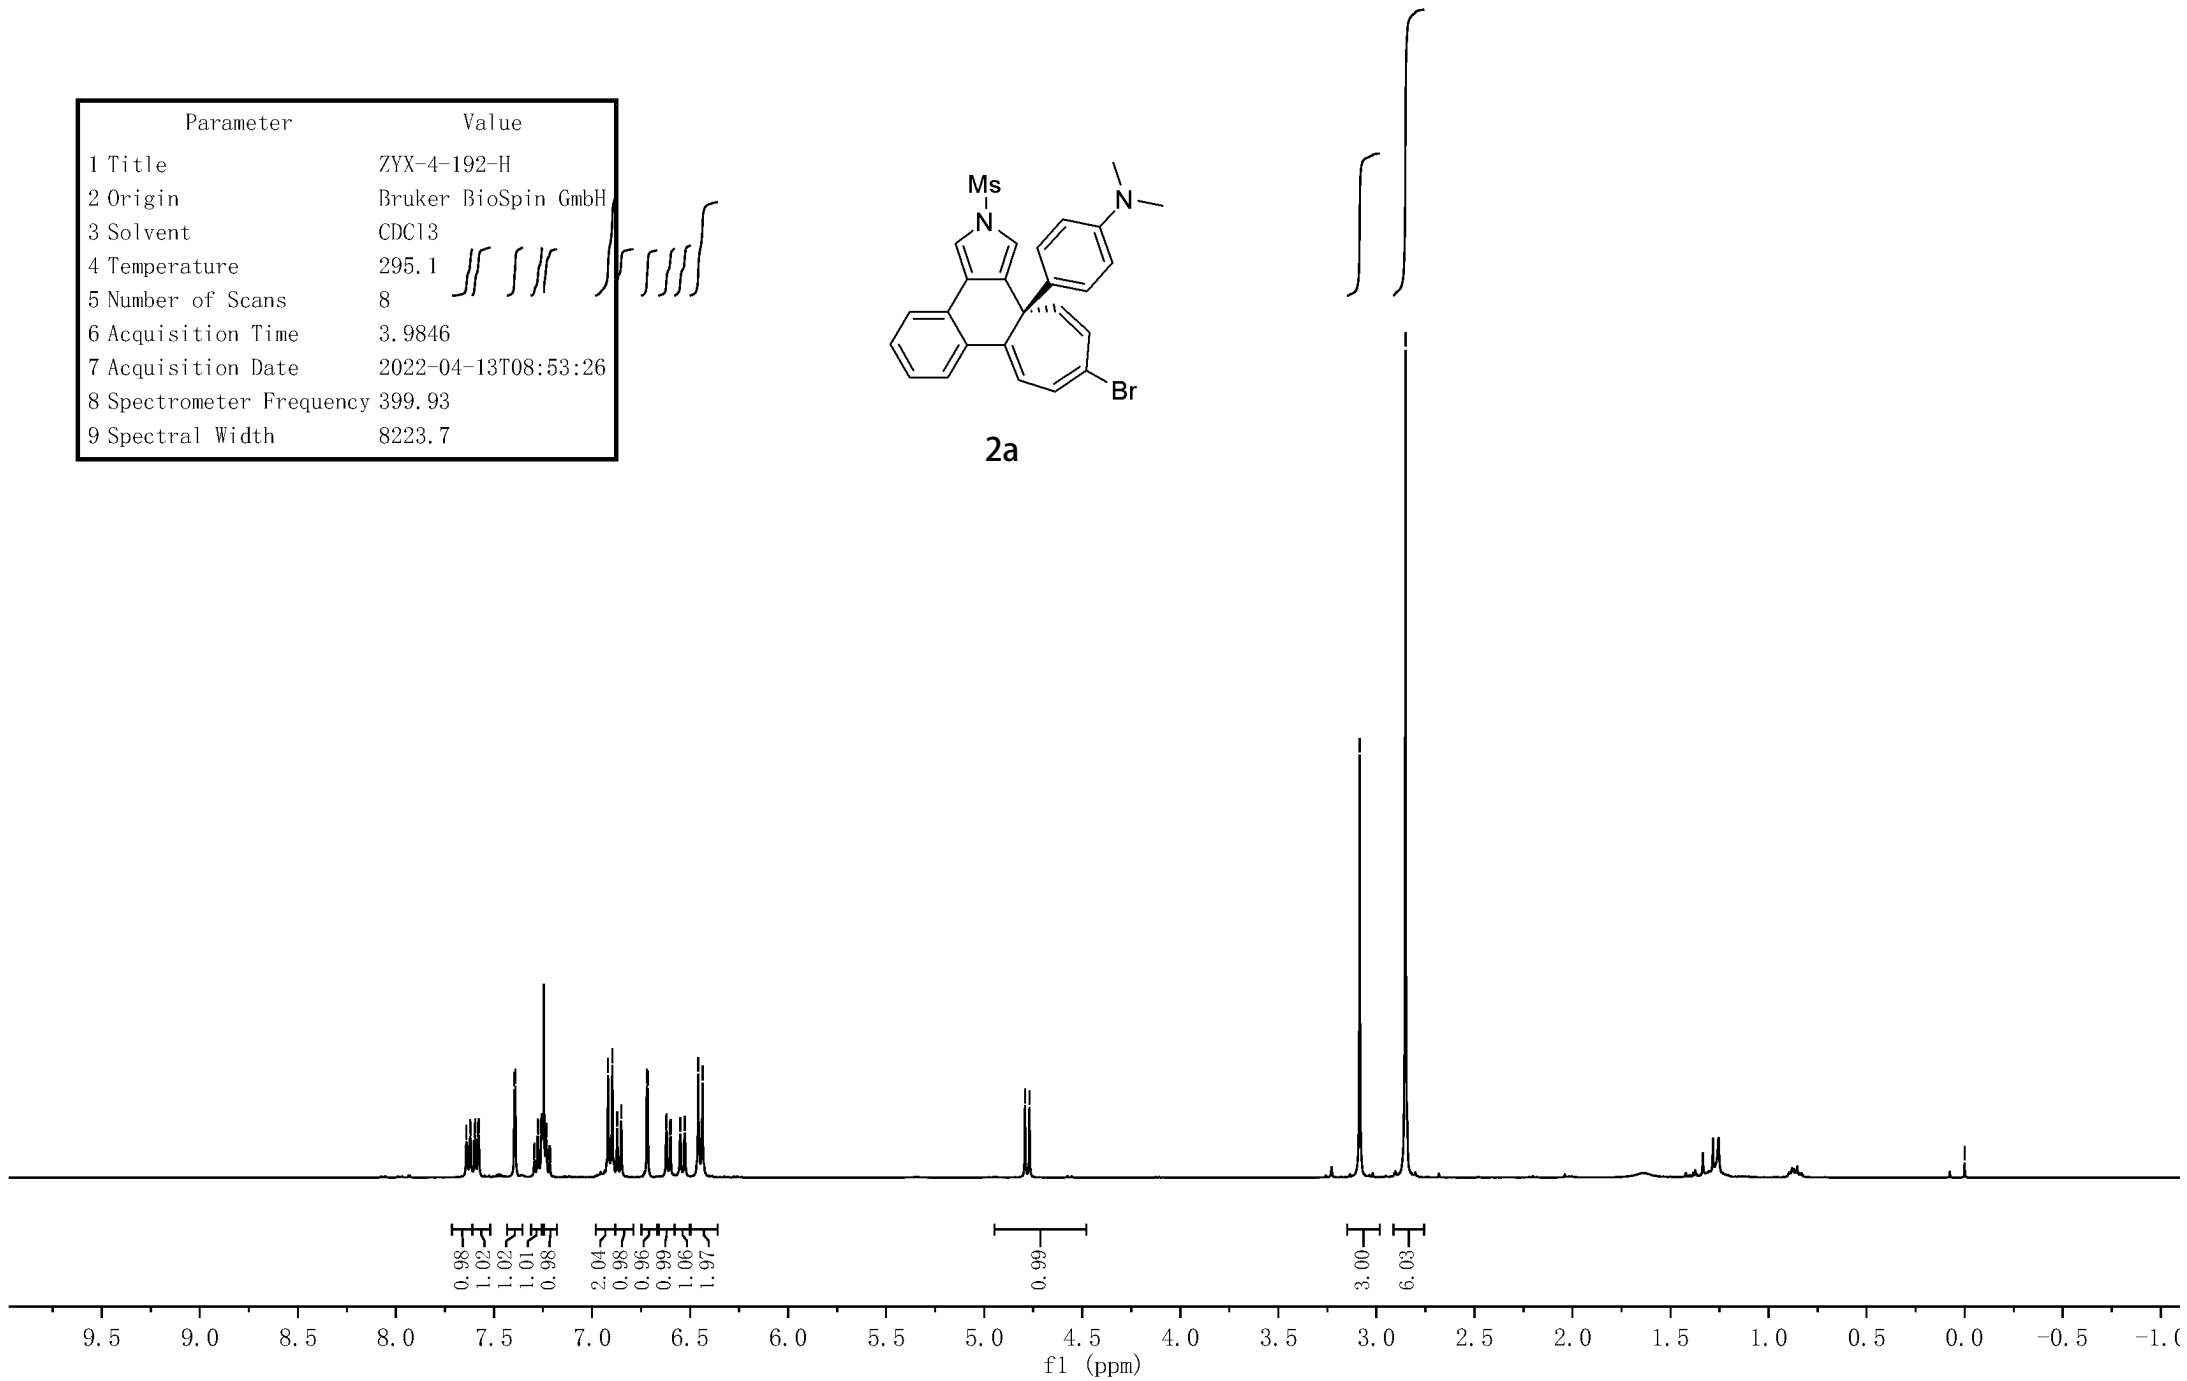

| Parameter                | Value               |
|--------------------------|---------------------|
| 1 Title                  | ZYX-4-192-C         |
| 2 Origin                 | Bruker BioSpin GmbH |
| 3 Solvent                | CDCl3               |
| 4 Temperature            | 295.5               |
| 5 Number of Scans        | 74                  |
| 6 Acquisition Time       | 1.3631              |
| 7 Acquisition Date       | 2022-04-13T08:56:12 |
| 8 Spectrometer Frequency | 100.56              |
| 9 Spectral Width         | 24038.5             |

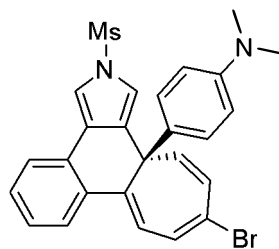

2a

148.70  
132.76  
131.99  
131.94  
128.01  
127.64  
127.61  
127.28  
127.04  
123.42  
122.17  
121.79  
121.70  
118.94  
111.51  
109.94

77.32  
77.00  
76.68

42.82  
42.76  
40.49

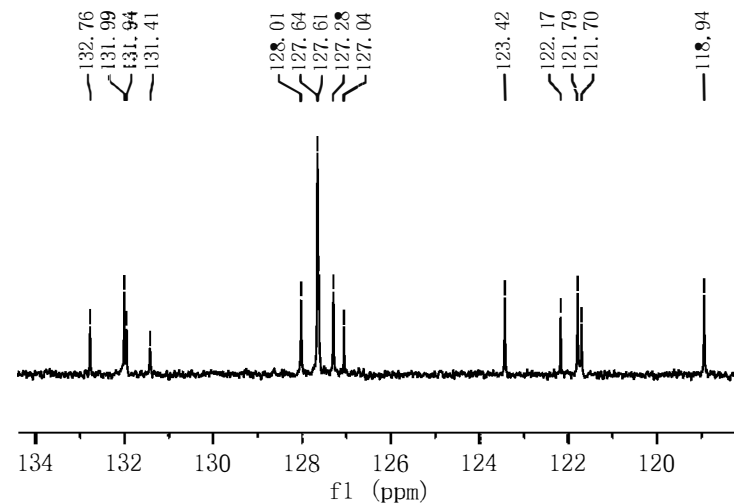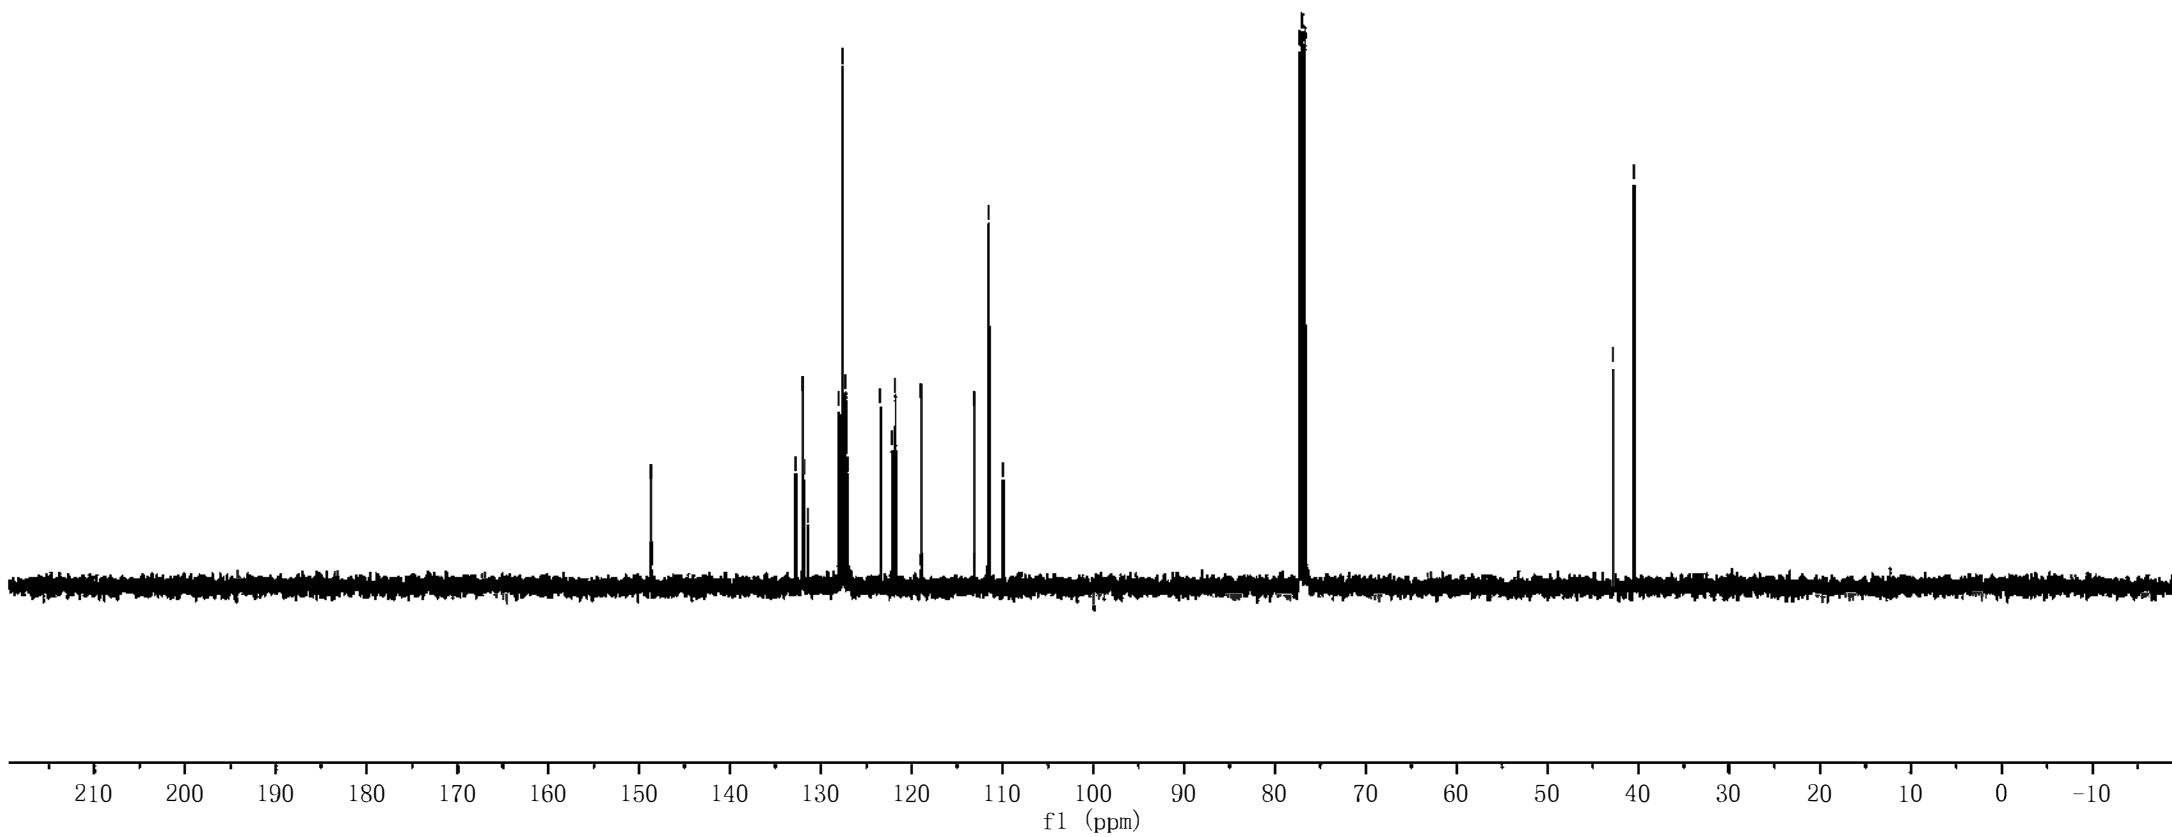

| Parameter                | Value               |
|--------------------------|---------------------|
| 1 Title                  | ZYX-4-192-dEPT      |
| 2 Origin                 | Bruker BioSpin GmbH |
| 3 Solvent                | CDC13               |
| 4 Temperature            | 295.7               |
| 5 Number of Scans        | 20                  |
| 6 Acquisition Time       | 1.3631              |
| 7 Acquisition Date       | 2022-04-13T09:01:33 |
| 8 Spectrometer Frequency | 100.56              |
| 9 Spectral Width         | 24038.5             |

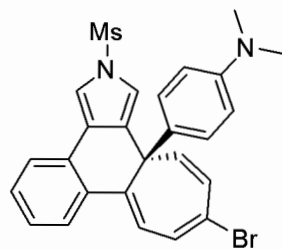

2a

131.99  
128.01  
127.64  
127.61  
127.28  
123.42  
121.78  
118.94  
113.12  
111.50  
109.95

77.20

42.76  
40.50

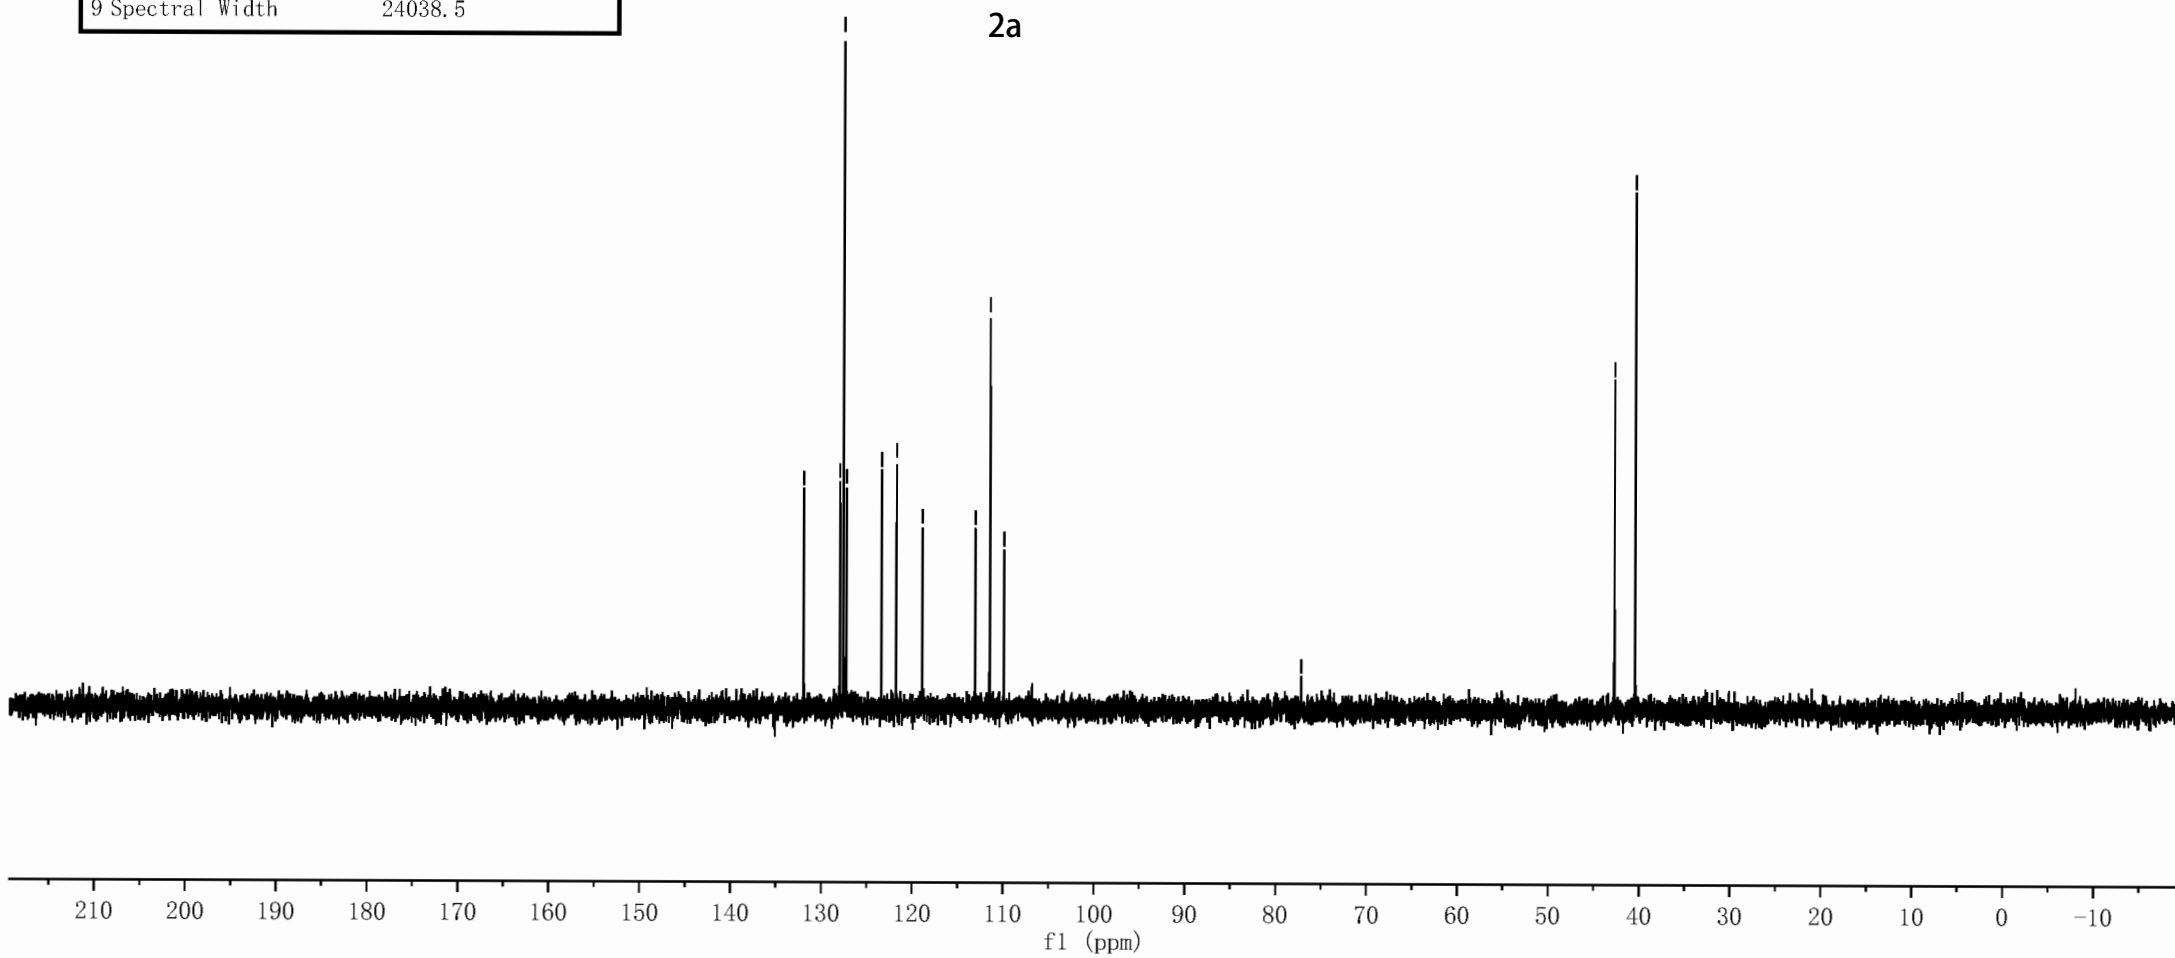

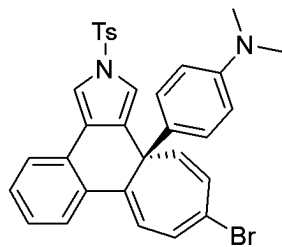

2b

| Parameter                | Value               |
|--------------------------|---------------------|
| 1 Title                  | zyx-4-176-h         |
| 2 Origin                 | Bruker BioSpin GmbH |
| 3 Solvent                | CDCl3               |
| 4 Temperature            | 297.3               |
| 5 Number of Scans        | 18                  |
| 6 Acquisition Time       | 3.1719              |
| 7 Acquisition Date       | 2022-04-02T20:20:54 |
| 8 Spectrometer Frequency | 500.17              |
| 9 Spectral Width         | 10330.6             |

7.629  
7.612  
7.590  
7.574  
7.550  
7.548  
7.535  
7.533  
7.381  
7.376  
7.232  
7.209  
7.193  
7.169  
6.865  
6.848  
6.825  
6.809  
6.757  
6.753  
6.608  
6.606  
6.592  
6.590  
6.517  
6.499  
6.442  
6.424

4.739  
4.721

2.850

2.351

0.000

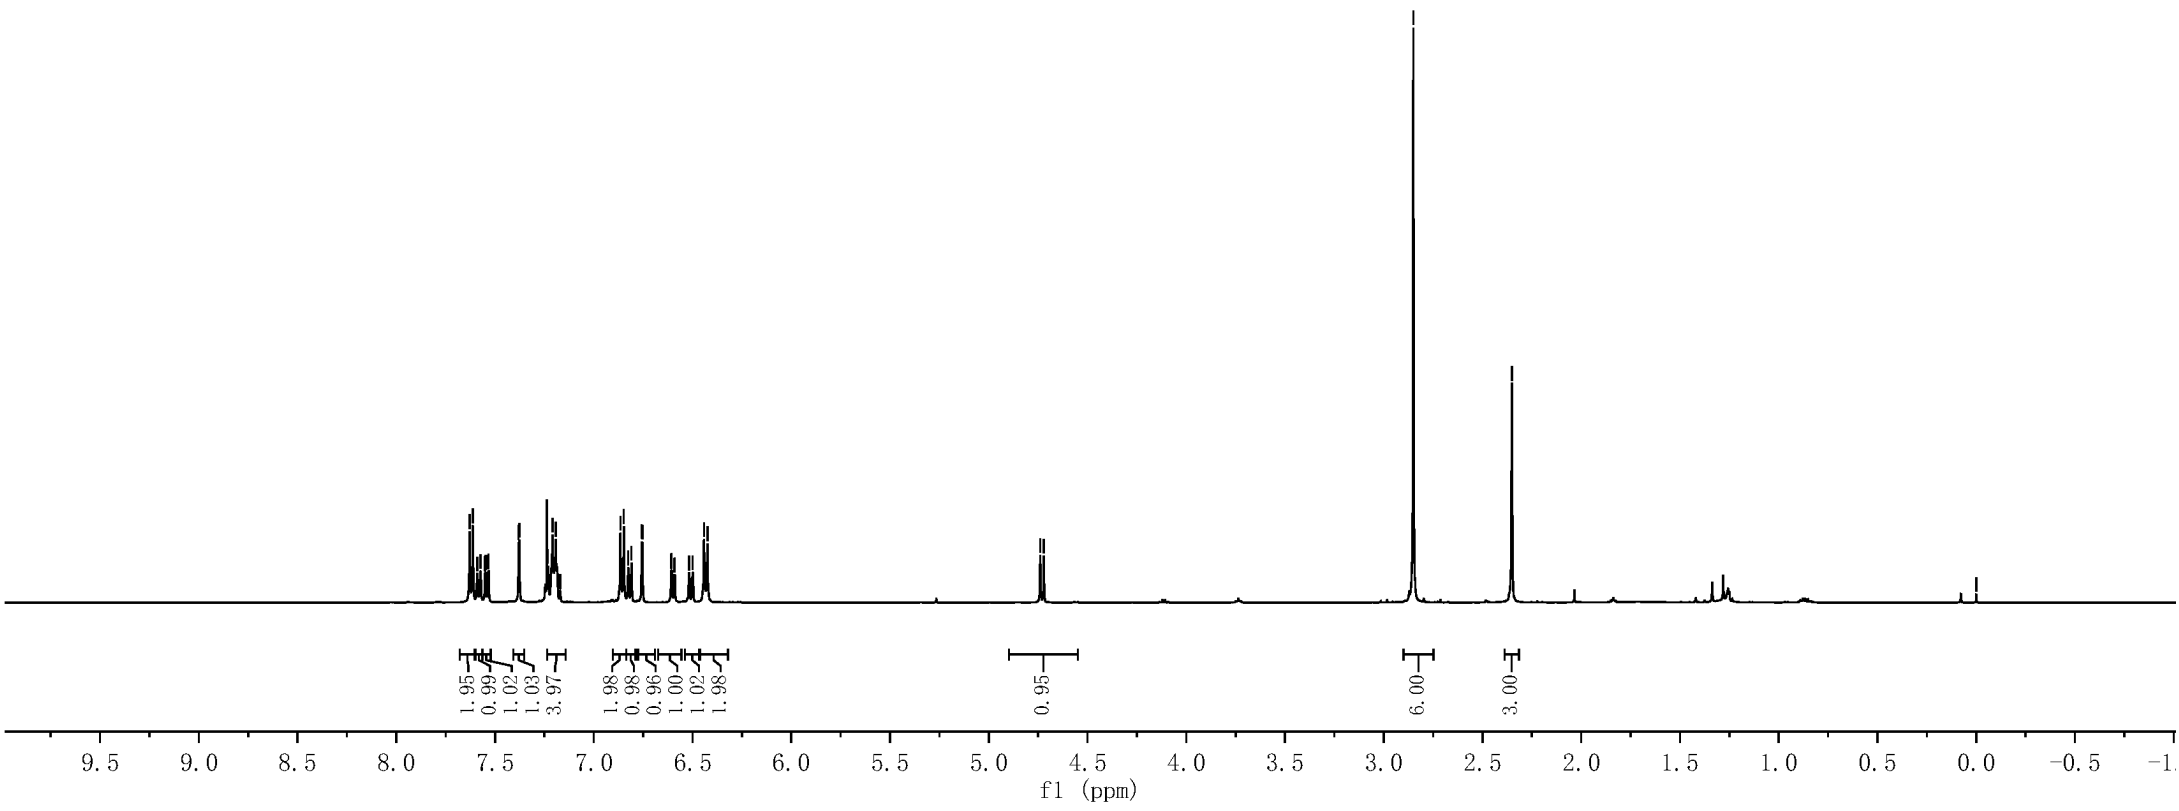



| Parameter                | Value               |
|--------------------------|---------------------|
| 1 Title                  | zyx-4-176-c         |
| 2 Origin                 | Bruker BioSpin GmbH |
| 3 Solvent                | CDCl3               |
| 4 Temperature            | 297.4               |
| 5 Number of Scans        | 58                  |
| 6 Acquisition Time       | 1.1010              |
| 7 Acquisition Date       | 2022-04-02T20:24:21 |
| 8 Spectrometer Frequency | 125.77              |
| 9 Spectral Width         | 29761.9             |

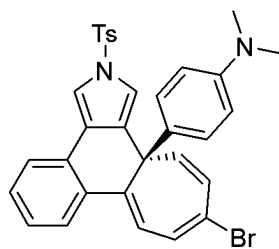

**2b**

148.67  
144.85  
132.01  
129.89  
127.93  
127.53  
127.47  
127.44  
127.38  
126.64  
123.46  
121.67  
119.58  
113.02  
111.61  
111.14

77.25  
77.00  
76.75

43.13  
40.57

21.55

133.01  
132.01  
131.80  
129.89  
127.93  
127.53  
127.47  
127.44  
127.38  
127.28  
126.64  
123.46  
122.29  
121.95  
121.67

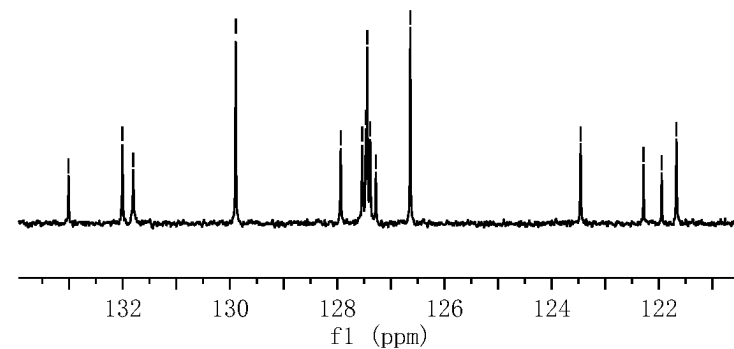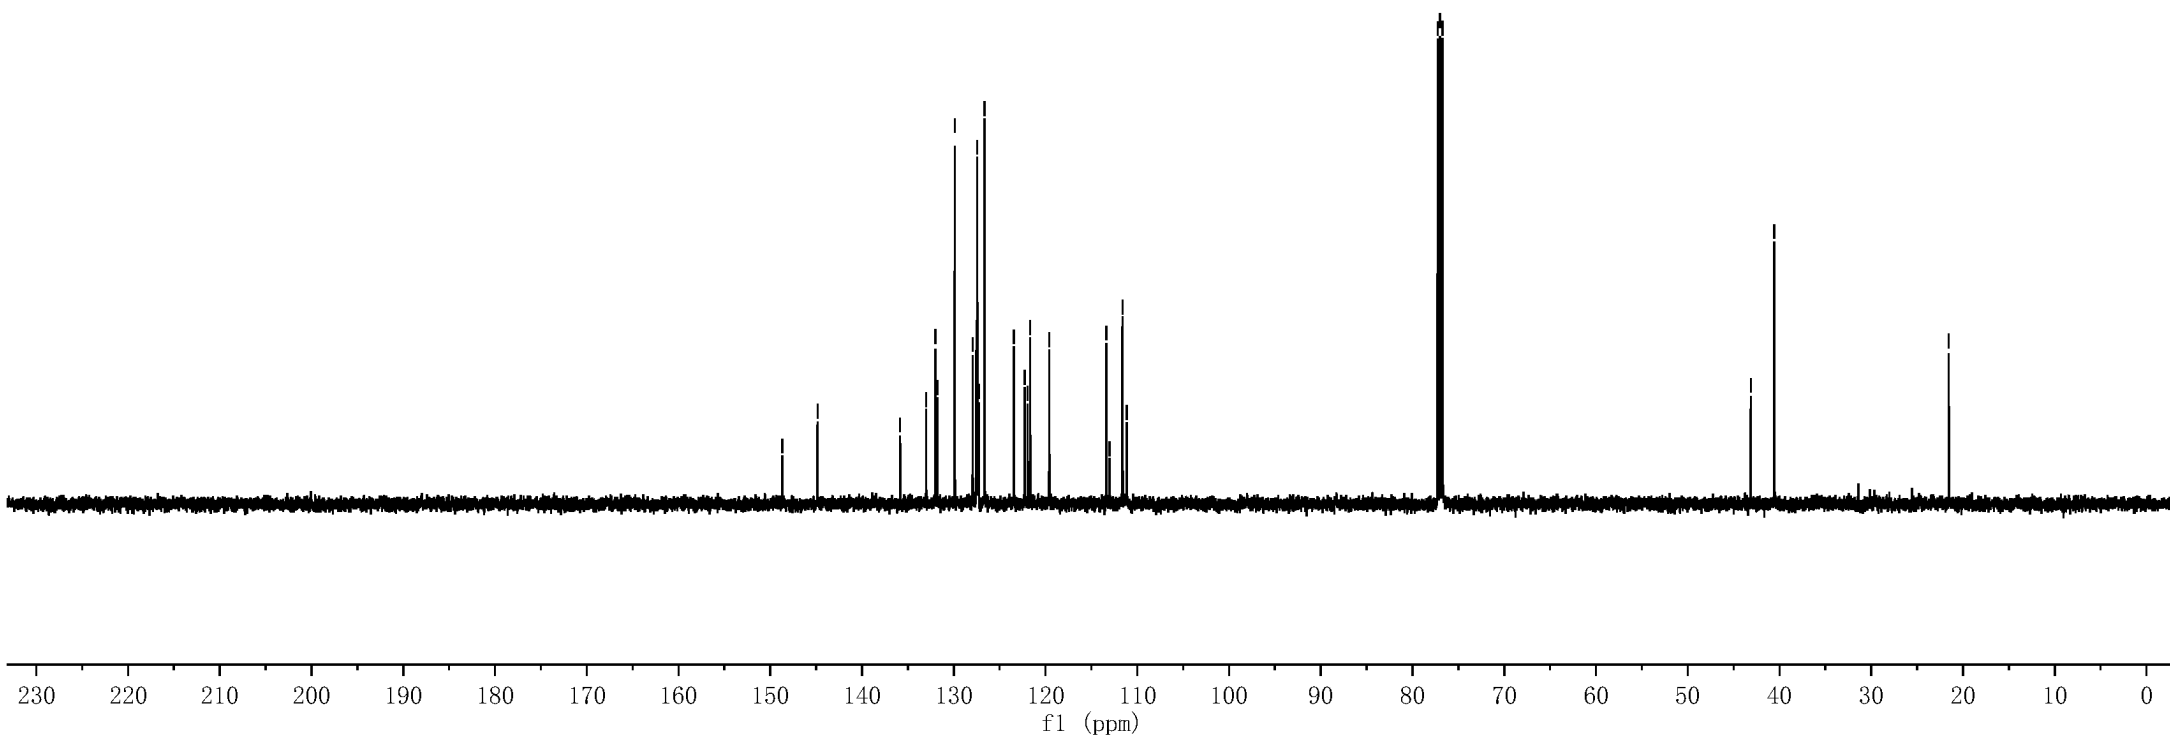

| Parameter                | Value               |
|--------------------------|---------------------|
| 1 Title                  | ZYX-4-195-H         |
| 2 Origin                 | Bruker BioSpin GmbH |
| 3 Solvent                | CDCl3               |
| 4 Temperature            | 295.5               |
| 5 Number of Scans        | 8                   |
| 6 Acquisition Time       | 3.9846              |
| 7 Acquisition Date       | 2022-04-13T09:06:13 |
| 8 Spectrometer Frequency | 399.93              |
| 9 Spectral Width         | 8223.7              |

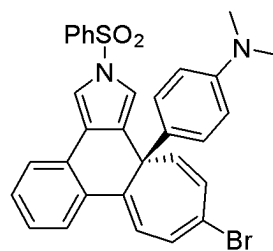

2c

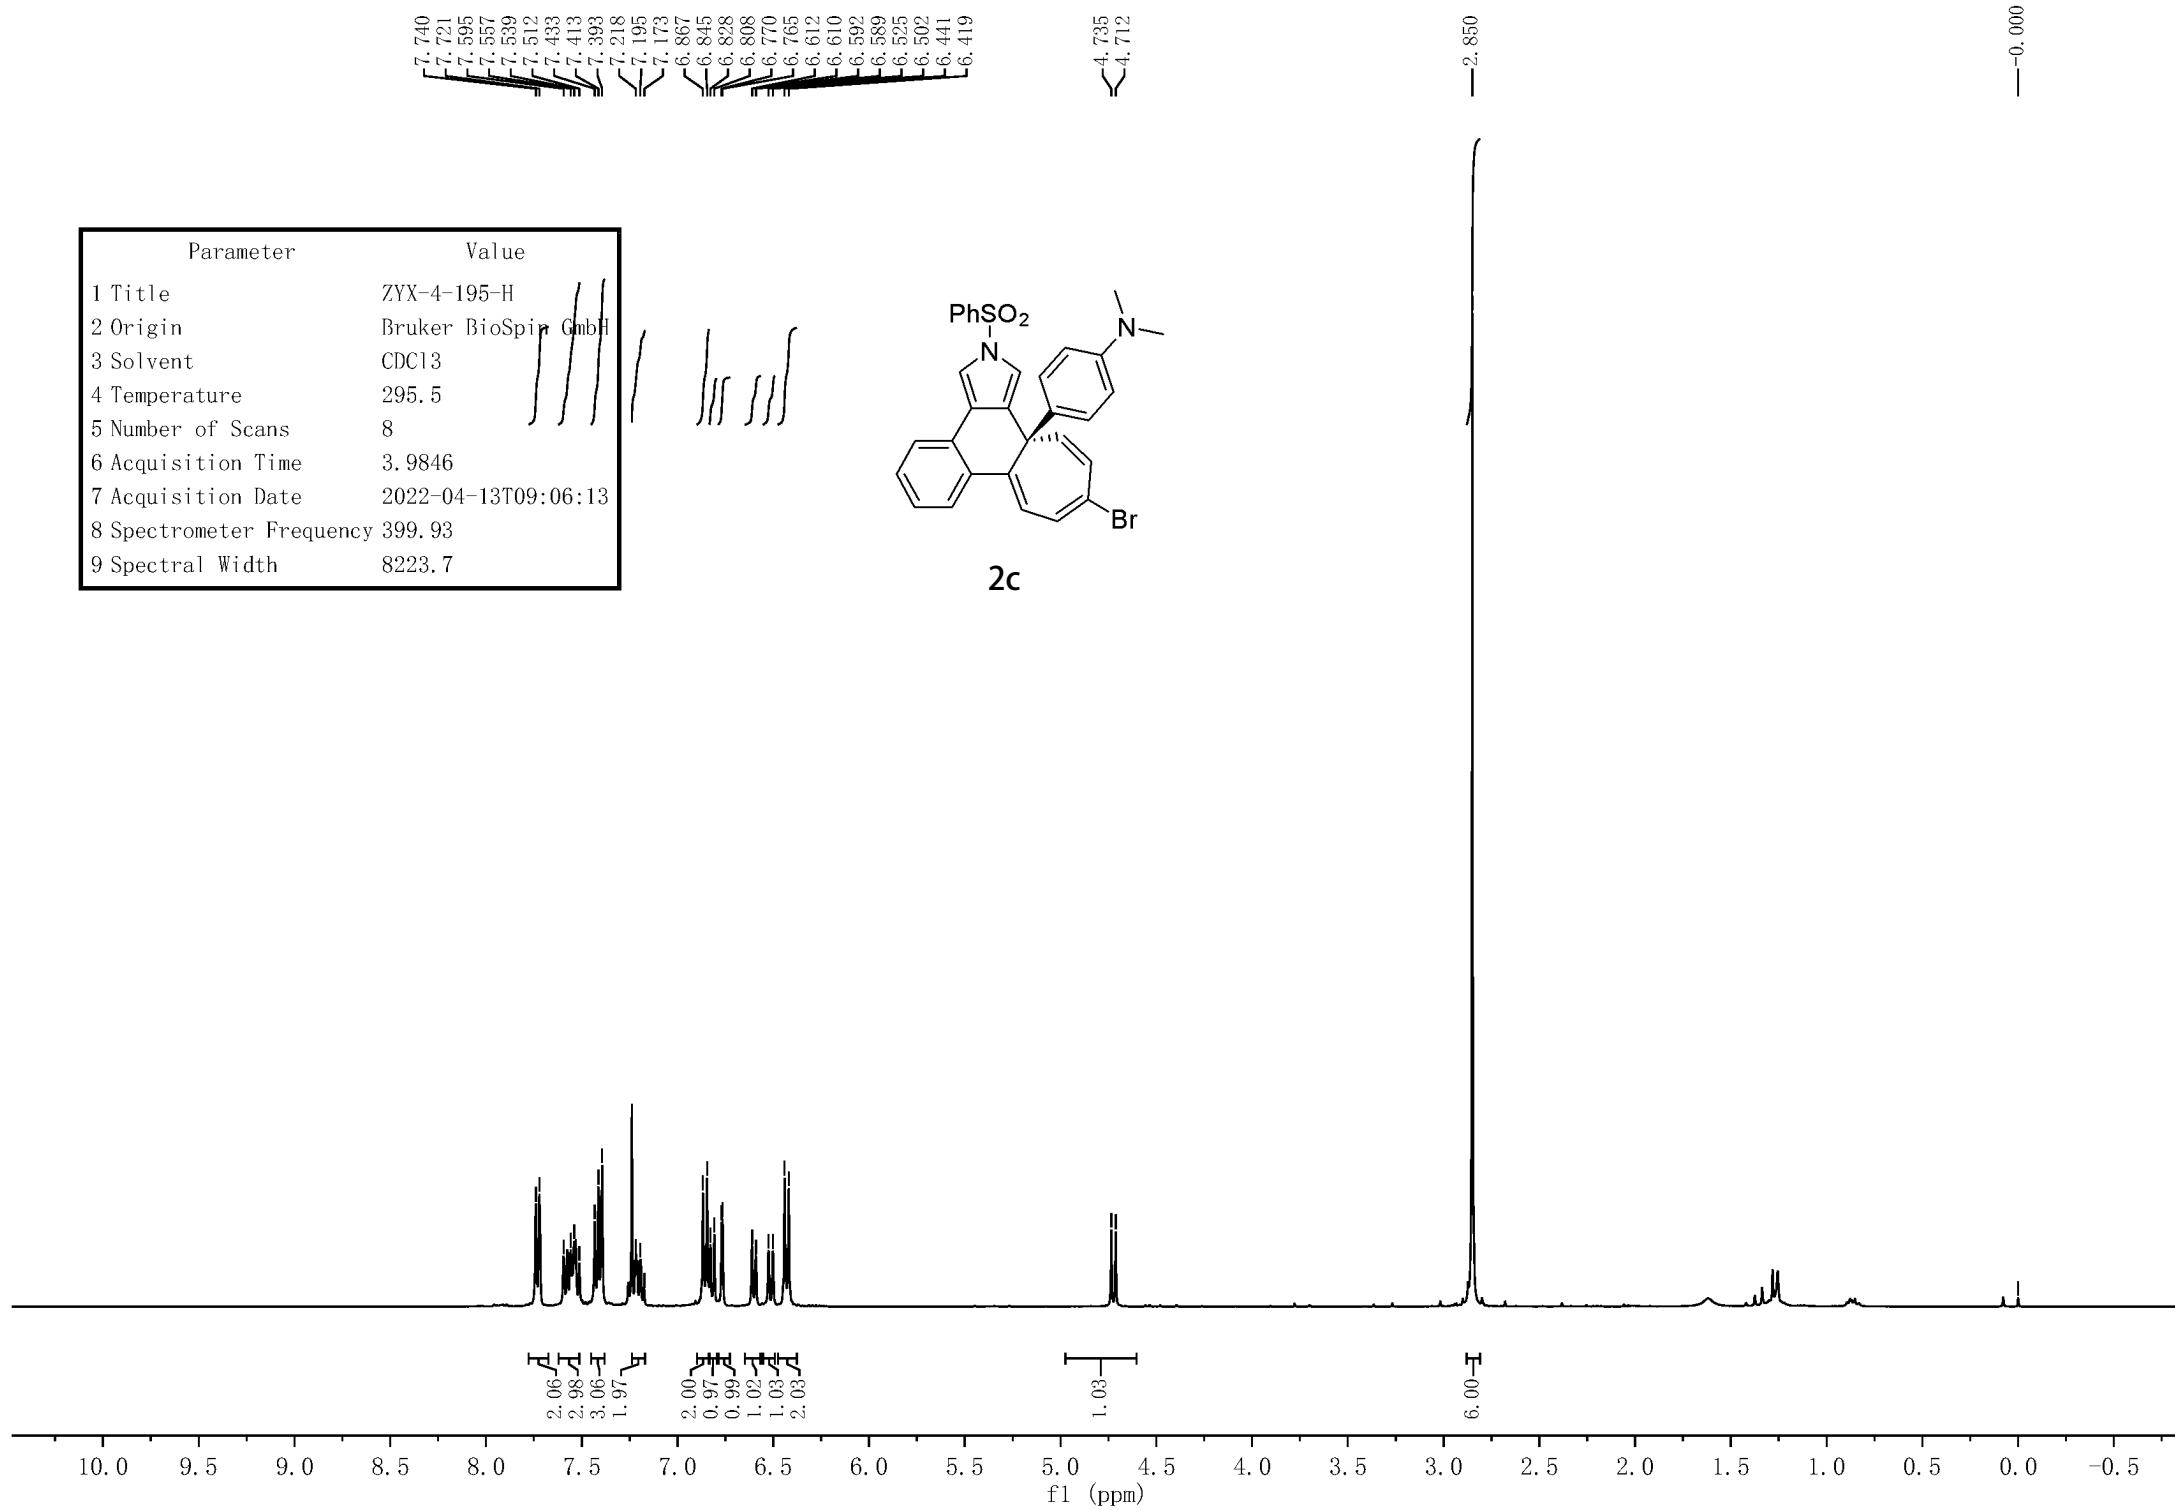

— 0.000

| Parameter                | Value               |
|--------------------------|---------------------|
| 1 Title                  | ZYX-4-195-C         |
| 2 Origin                 | Bruker BioSpin GmbH |
| 3 Solvent                | CDCl3               |
| 4 Temperature            | 295.8               |
| 5 Number of Scans        | 67                  |
| 6 Acquisition Time       | 1.3631              |
| 7 Acquisition Date       | 2022-04-13T09:07:30 |
| 8 Spectrometer Frequency | 100.56              |
| 9 Spectral Width         | 24038.5             |



2c

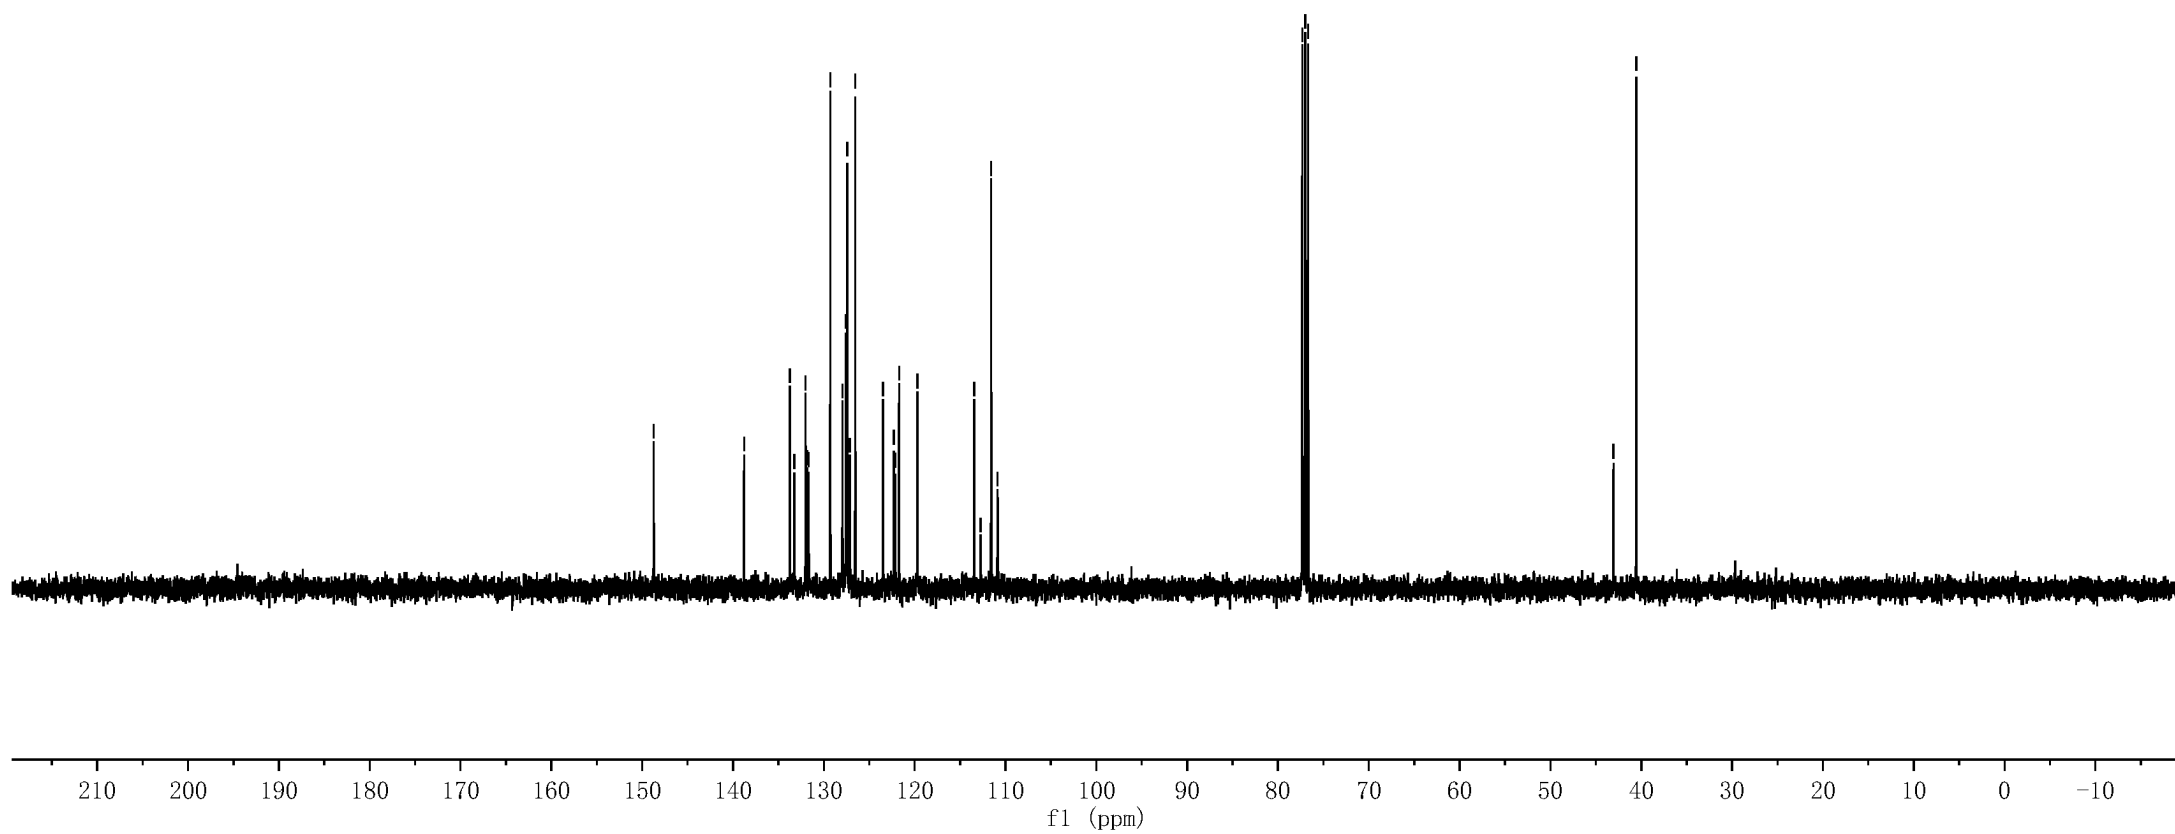

148.73  
138.78  
133.74  
129.29  
127.56  
127.43  
127.40  
126.54  
121.71  
119.88  
113.44  
112.73  
111.58  
110.87

77.32  
77.00  
76.68

43.06  
40.55

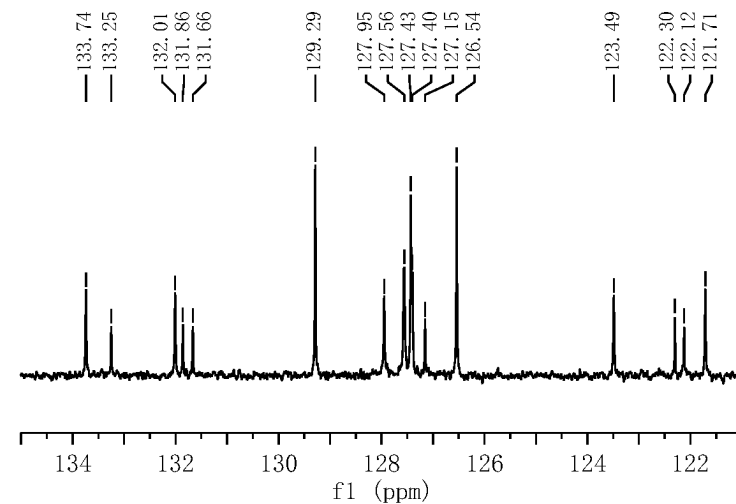

133.74  
133.25  
132.01  
131.86  
131.66  
129.29  
127.95  
127.56  
127.43  
127.40  
127.15  
126.54  
123.49  
122.30  
122.12  
121.71

| Parameter                | Value               |
|--------------------------|---------------------|
| 1 Title                  | zyx-4-186-h         |
| 2 Origin                 | Bruker BioSpin GmbH |
| 3 Solvent                | CDCl3               |
| 4 Temperature            | 297.4               |
| 5 Number of Scans        | 14                  |
| 6 Acquisition Time       | 3.1719              |
| 7 Acquisition Date       | 2022-04-04T21:35:56 |
| 8 Spectrometer Frequency | 500.17              |
| 9 Spectral Width         | 10330.6             |

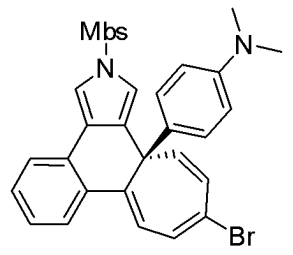

2d

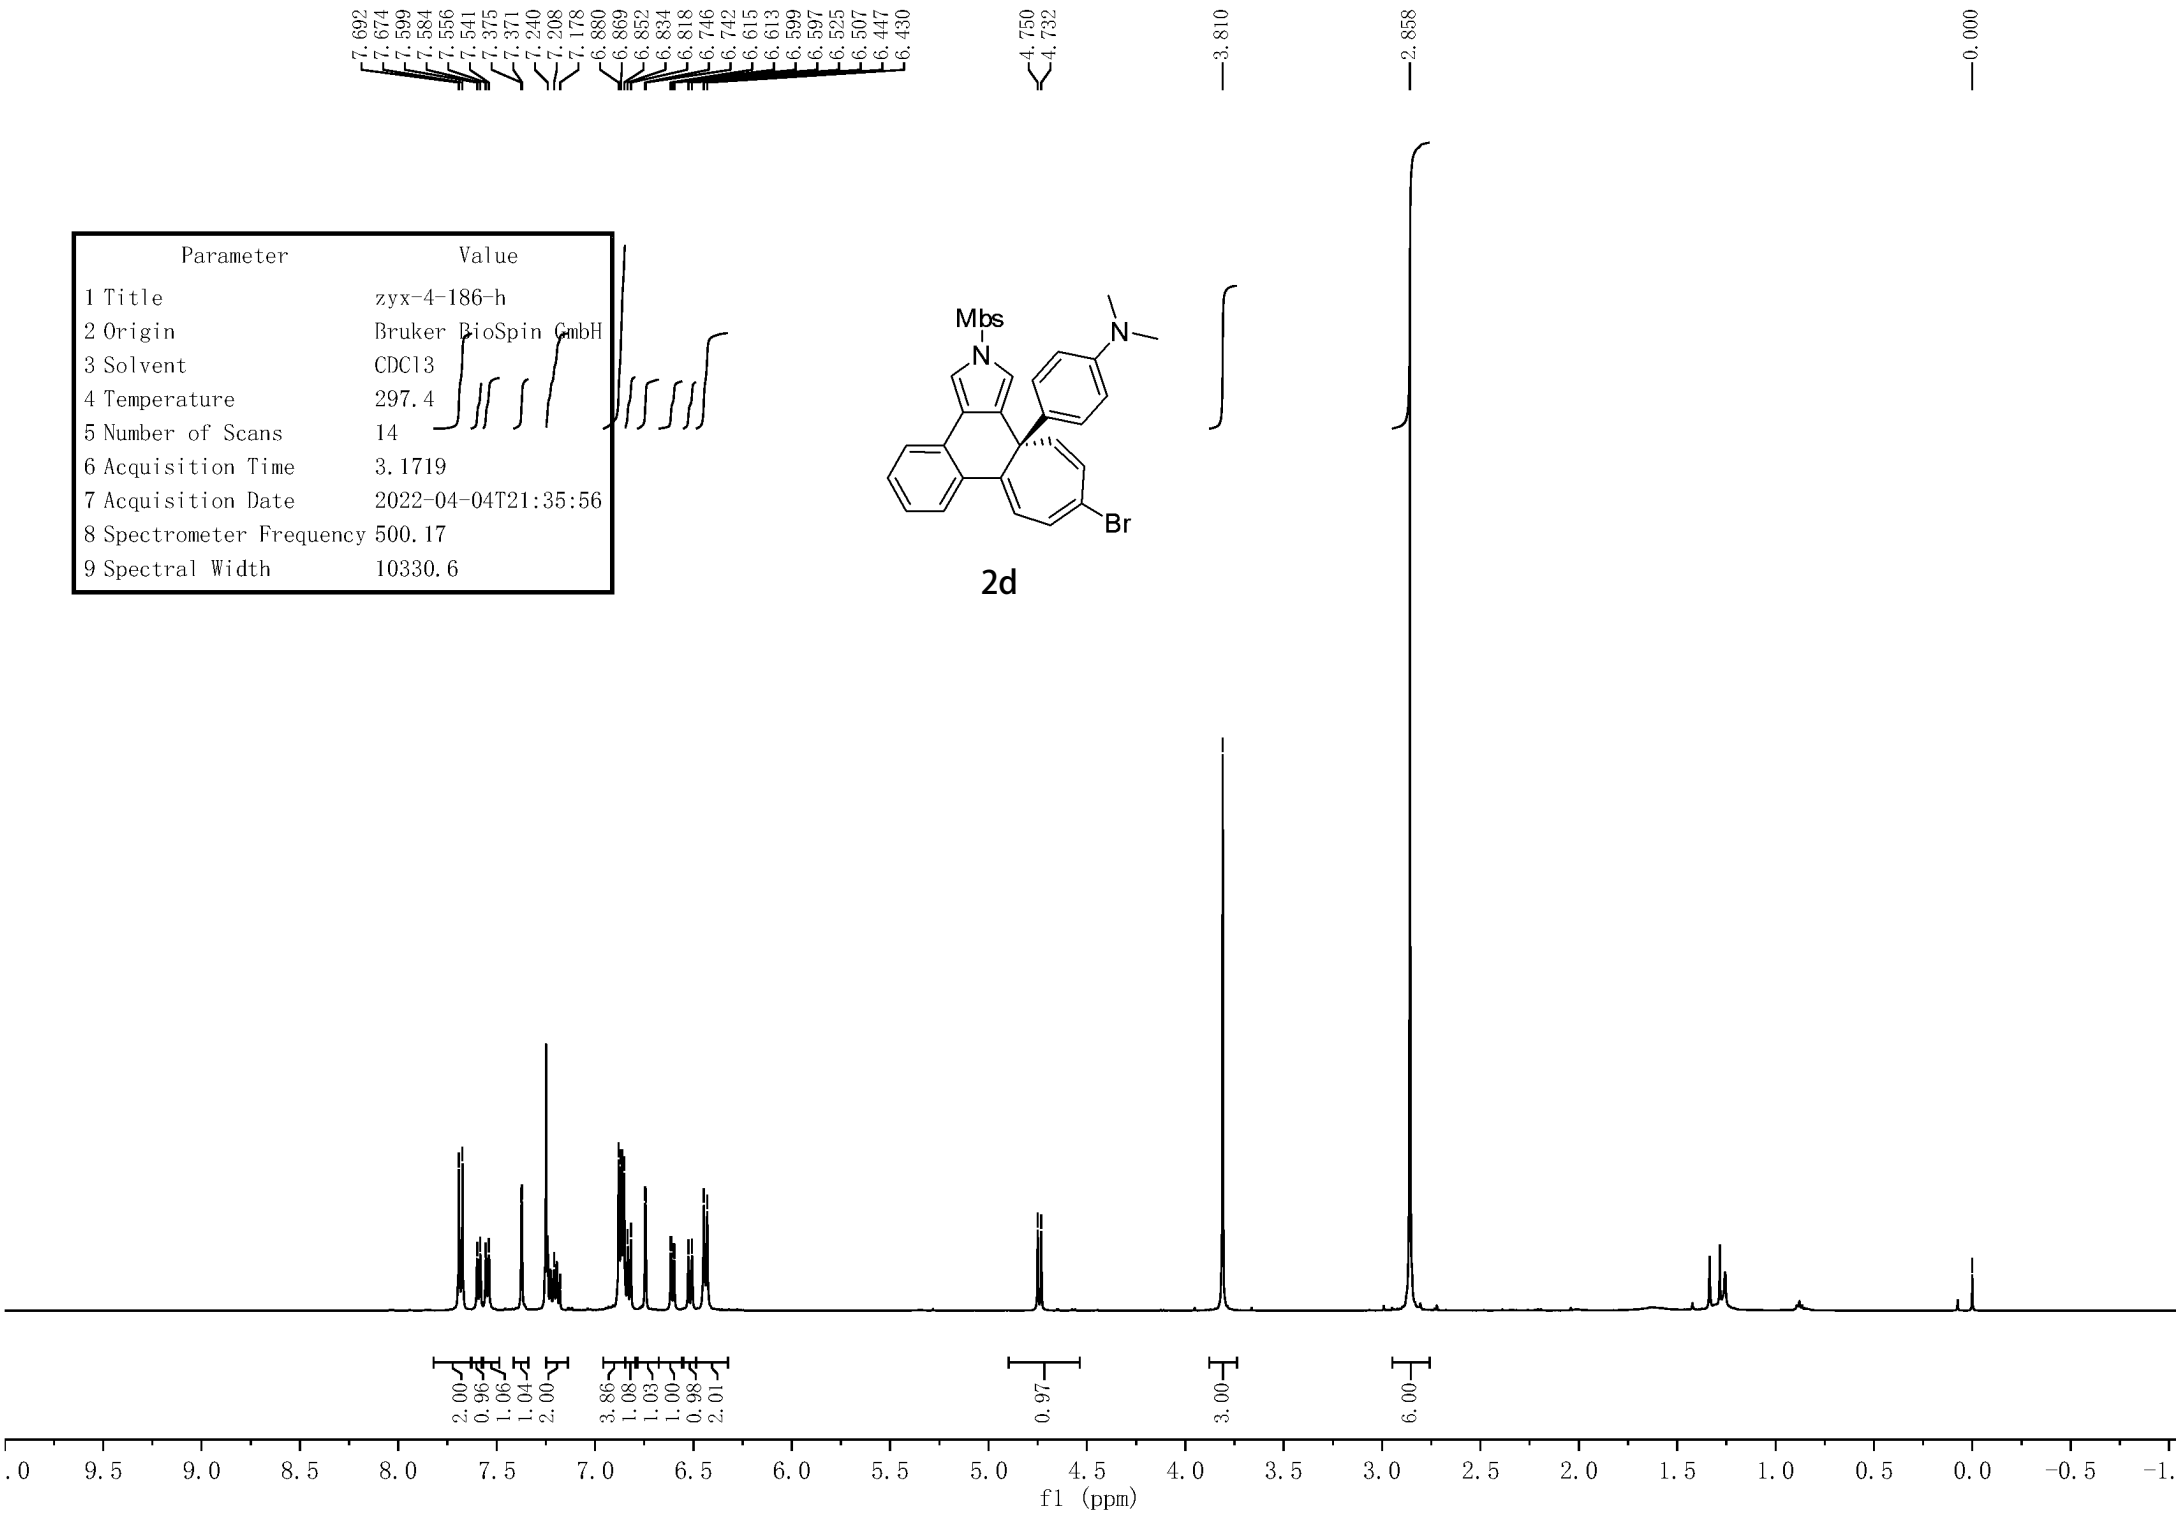

| Parameter                | Value               |
|--------------------------|---------------------|
| 1 Title                  | zyx-4-186--c        |
| 2 Origin                 | Bruker BioSpin GmbH |
| 3 Solvent                | CDCl3               |
| 4 Temperature            | 297.6               |
| 5 Number of Scans        | 96                  |
| 6 Acquisition Time       | 1.1010              |
| 7 Acquisition Date       | 2022-04-04T21:41:04 |
| 8 Spectrometer Frequency | 125.77              |
| 9 Spectral Width         | 29761.9             |

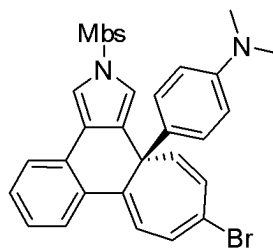

2d

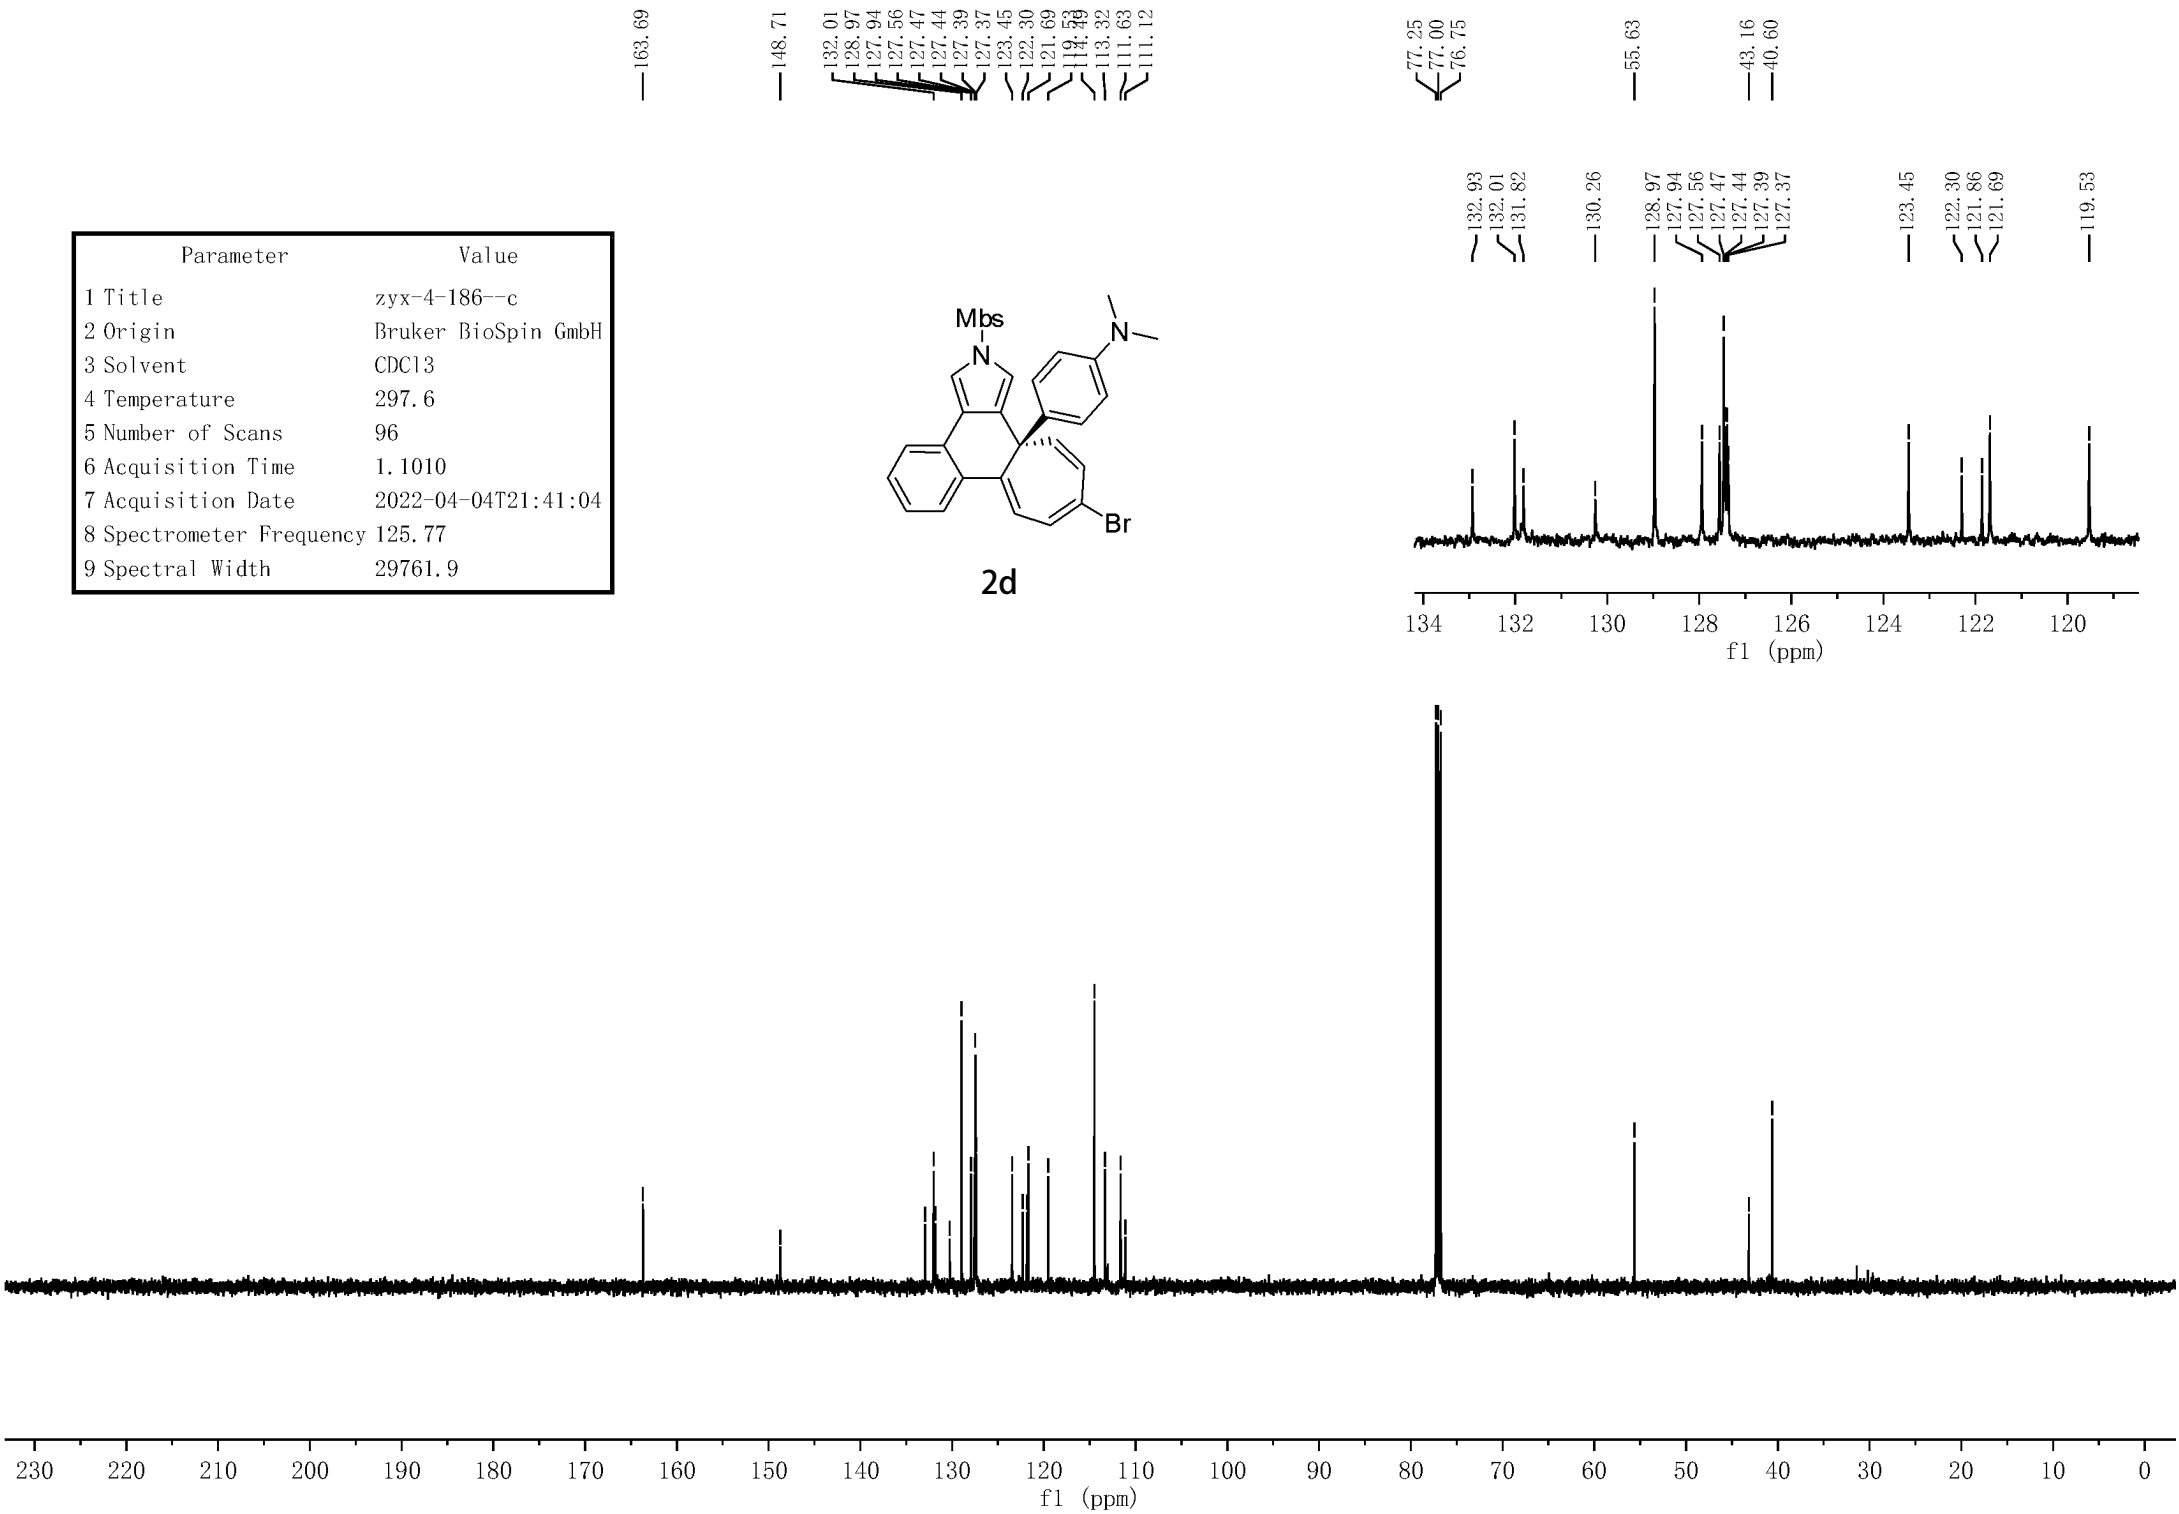

| Parameter                | Value               |
|--------------------------|---------------------|
| 1 Title                  | ZYX-4-216-H         |
| 2 Origin                 | Bruker BioSpin GmbH |
| 3 Solvent                | CDCl3               |
| 4 Temperature            | 295.5               |
| 5 Number of Scans        | 8                   |
| 6 Acquisition Time       | 3.9846              |
| 7 Acquisition Date       | 2022-04-14T14:25:16 |
| 8 Spectrometer Frequency | 399.93              |
| 9 Spectral Width         | 8223.7              |

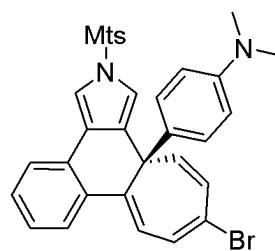

2e

7.618  
7.599  
7.595  
7.513  
7.509  
7.494  
7.490  
7.216  
7.196  
6.909  
6.872  
6.867  
6.850  
6.753  
6.747  
6.644  
6.641  
6.623  
6.620  
6.543  
6.520  
6.434  
6.412

4.881  
4.858

2.836

2.463

2.266

0.000

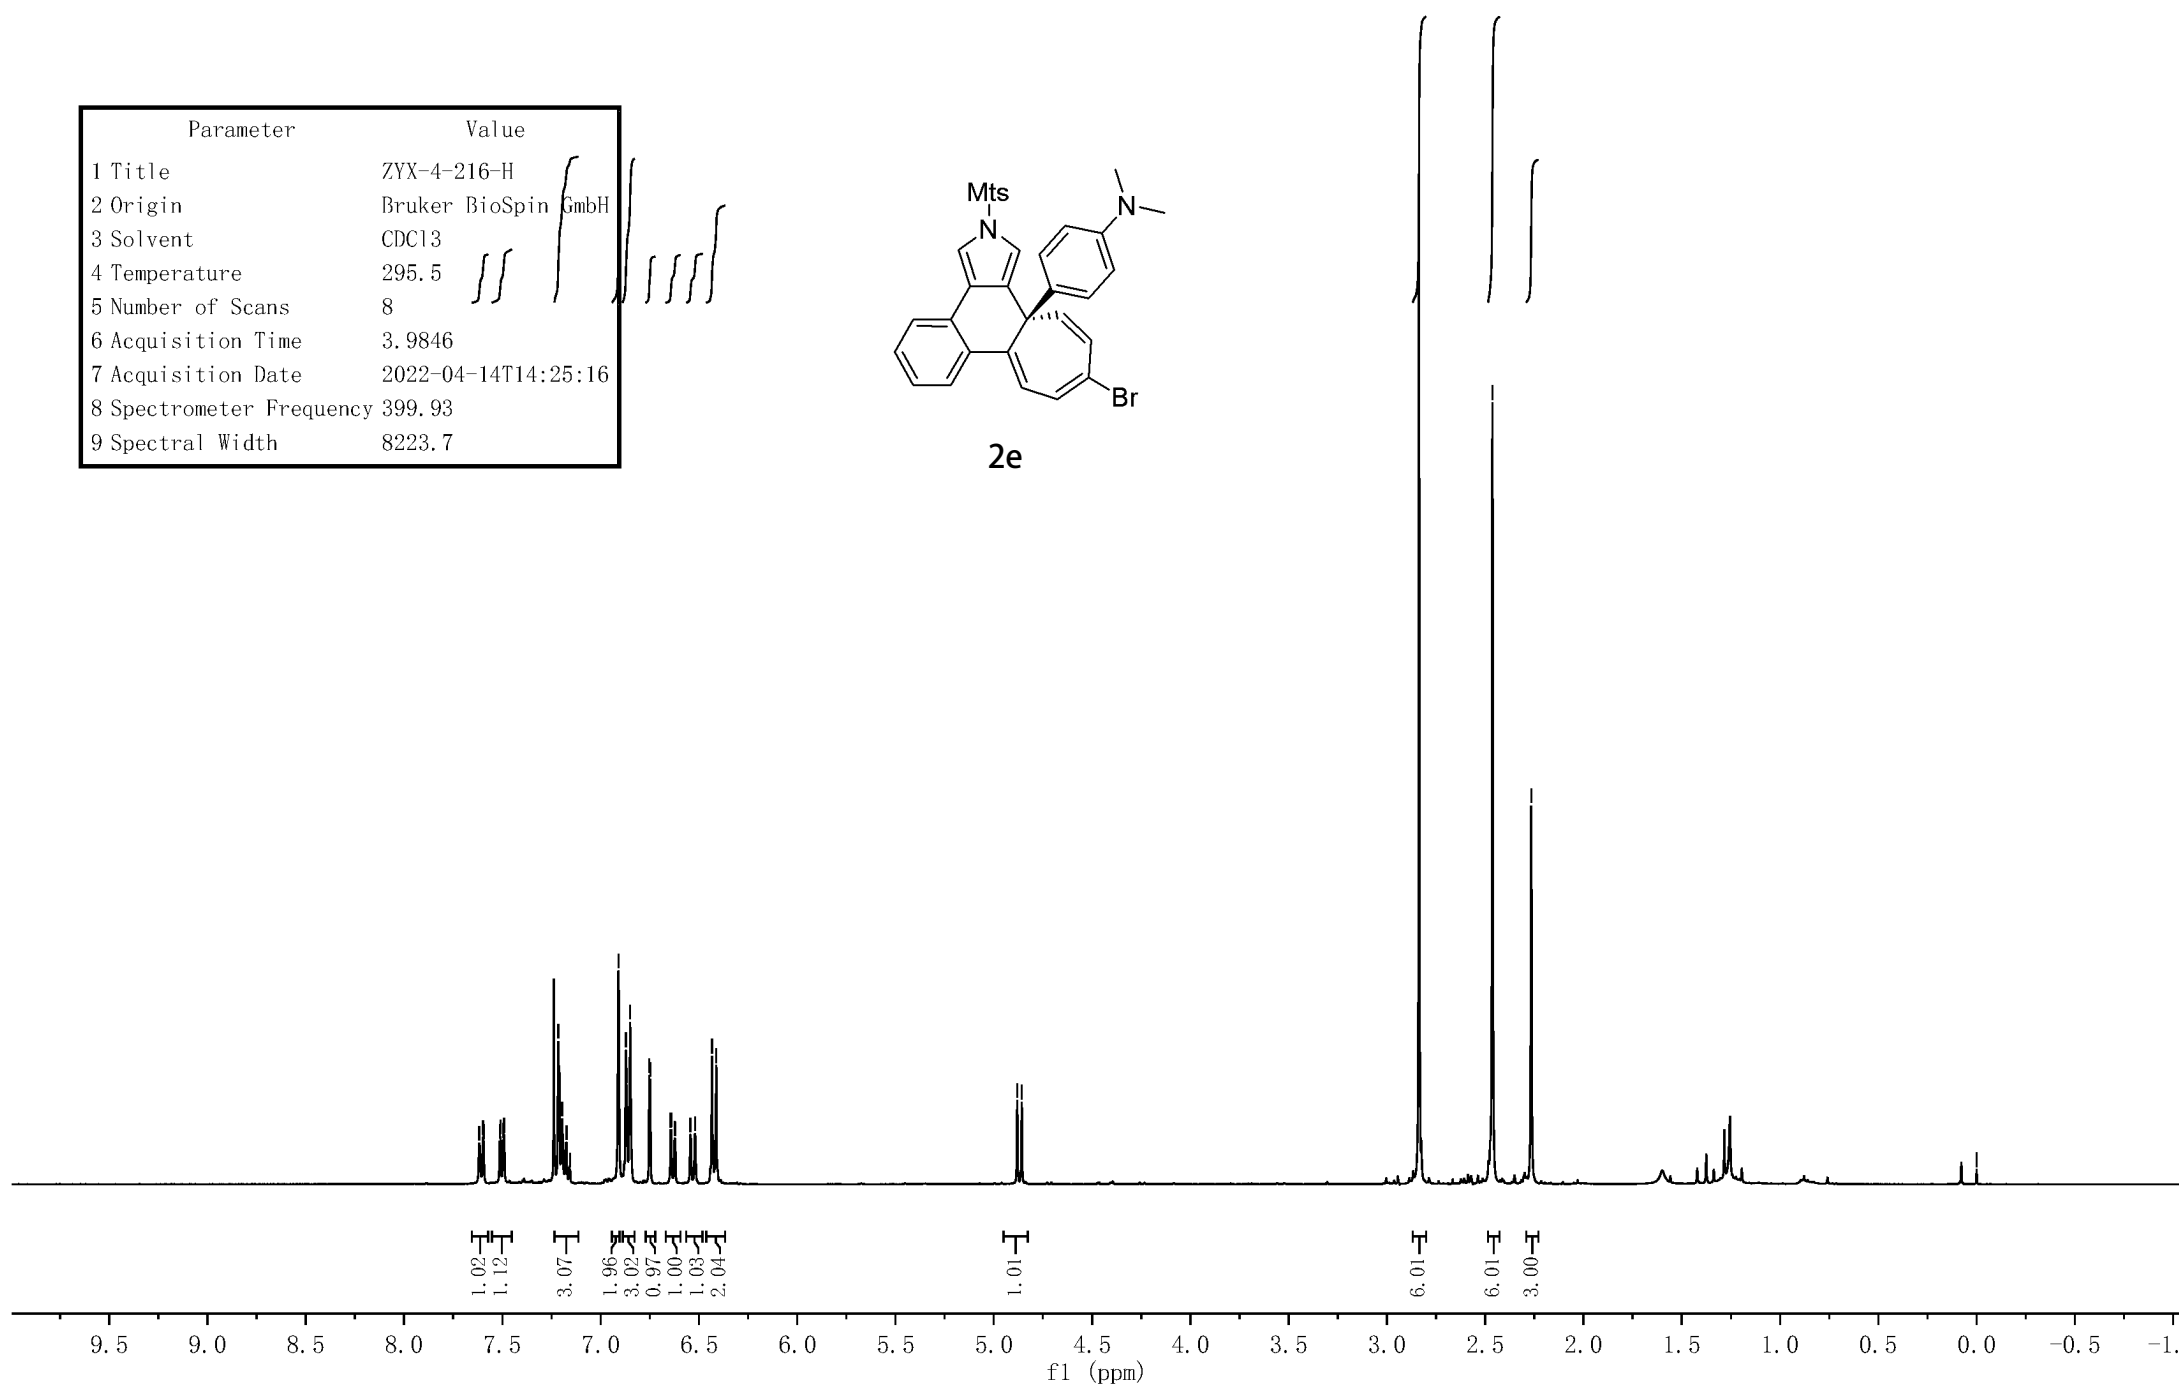

| Parameter                | Value               |
|--------------------------|---------------------|
| 1 Title                  | ZYX-4-216-C         |
| 2 Origin                 | Bruker BioSpin GmbH |
| 3 Solvent                | CDCl3               |
| 4 Temperature            | 295.7               |
| 5 Number of Scans        | 61                  |
| 6 Acquisition Time       | 1.3631              |
| 7 Acquisition Date       | 2022-04-14T14:26:36 |
| 8 Spectrometer Frequency | 100.56              |
| 9 Spectral Width         | 24038.5             |

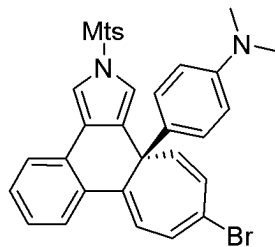

2e

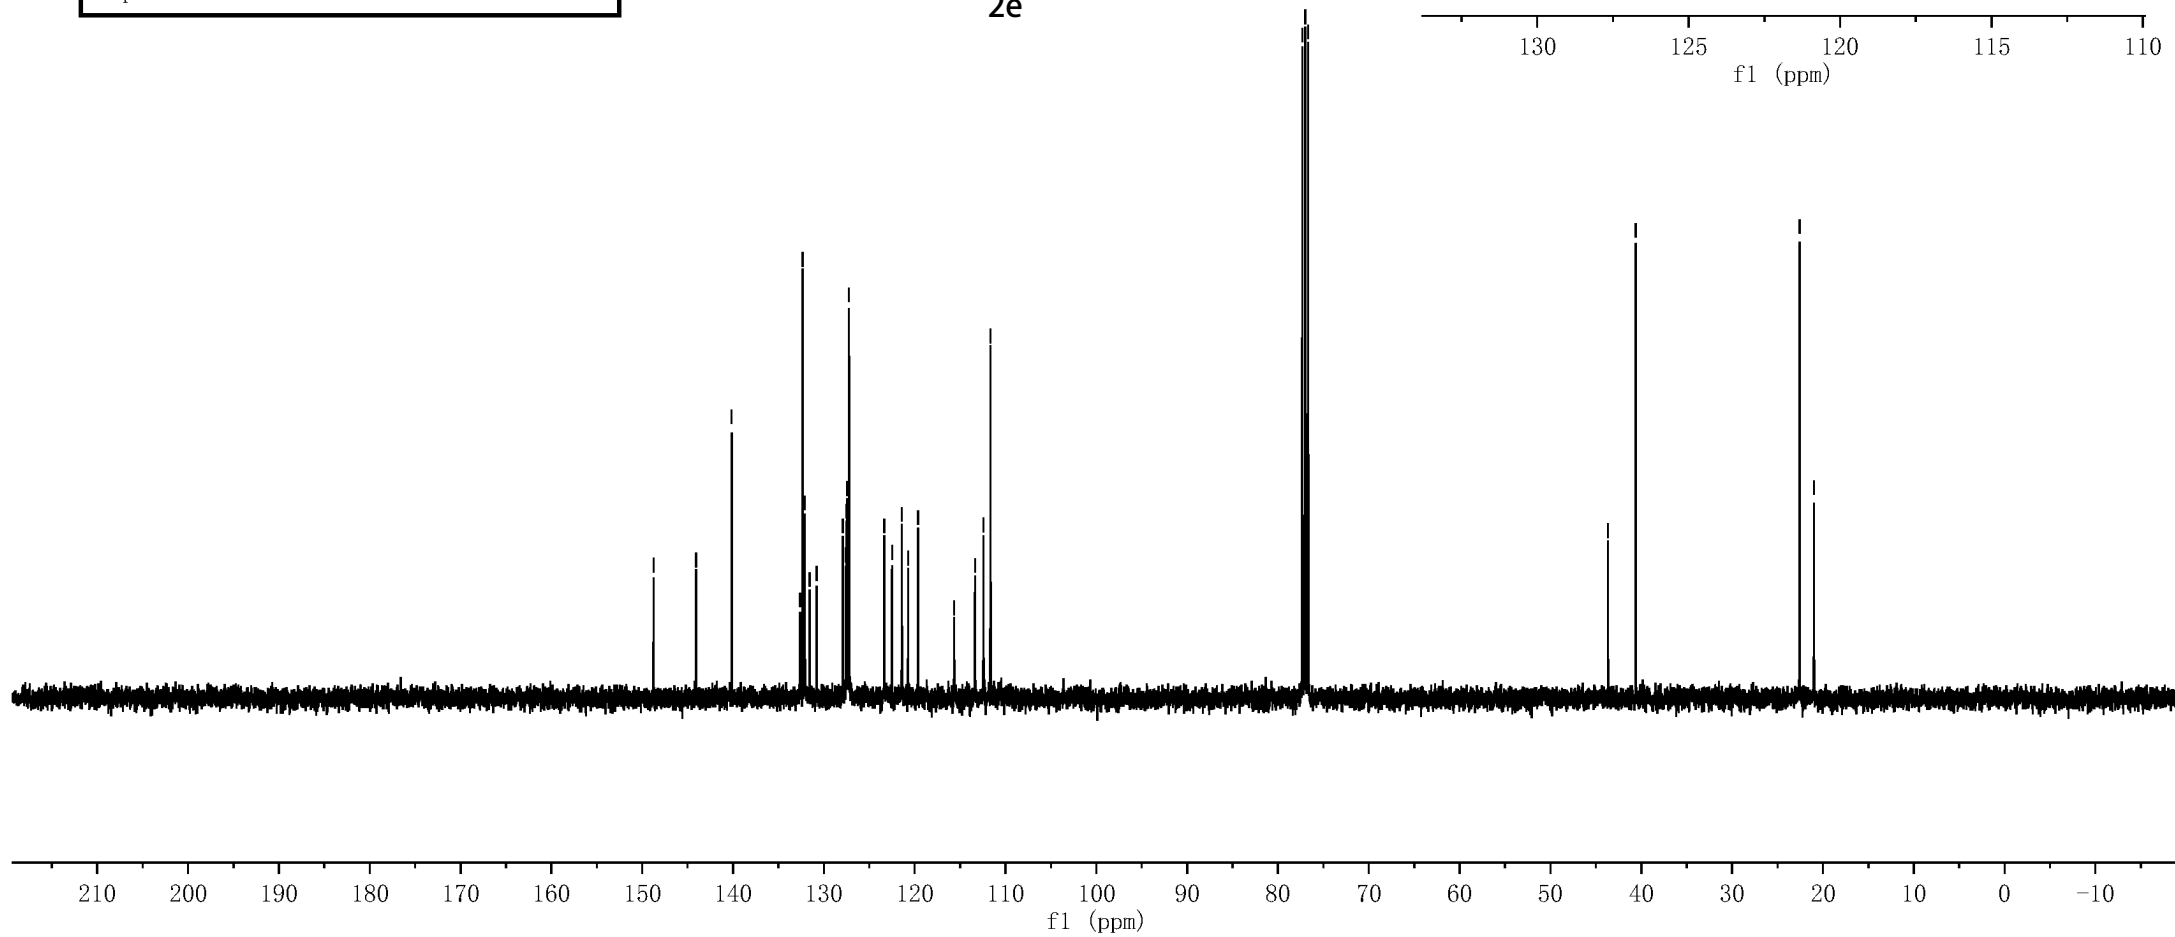

148.75  
144.08  
140.15  
132.61  
132.33  
132.11  
132.09  
131.57  
130.79  
127.91  
127.55  
127.48  
127.45  
127.25  
127.23  
123.33  
122.49  
121.41  
120.72  
119.64  
115.65  
113.35  
112.43  
111.65

77.32  
77.00  
76.68

43.67  
40.63

22.57  
20.98

132.61  
132.33  
132.11  
132.09  
131.57  
130.79  
127.91  
127.55  
127.48  
127.45  
127.25  
127.23

123.33  
122.49  
121.41  
120.72  
119.64

115.65

113.35  
112.43  
111.65

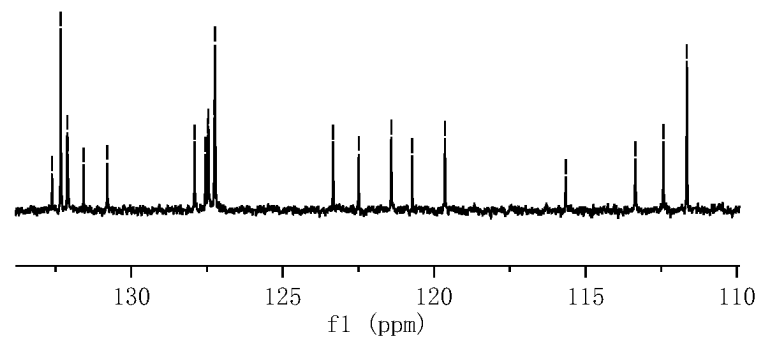

| Parameter                | Value               |
|--------------------------|---------------------|
| 1 Title                  | zyx-4-187-n         |
| 2 Origin                 | Bruker BioSpin GmbH |
| 3 Solvent                | CDCl3               |
| 4 Temperature            | 297.8               |
| 5 Number of Scans        | 16                  |
| 6 Acquisition Time       | 3.1719              |
| 7 Acquisition Date       | 2022-04-07T09:44:10 |
| 8 Spectrometer Frequency | 500.17              |
| 9 Spectral Width         | 10330.6             |

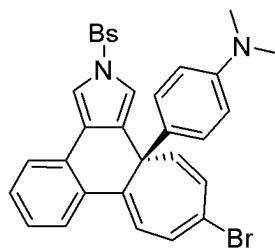

2f

7.596  
7.580  
7.547  
7.520  
7.508  
7.361  
7.357  
7.215  
7.200  
7.185  
6.850  
6.832  
6.813  
6.739  
6.735  
6.620  
6.618  
6.603  
6.602  
6.533  
6.515  
6.431  
6.413

4.766  
4.748

2.858

0.000

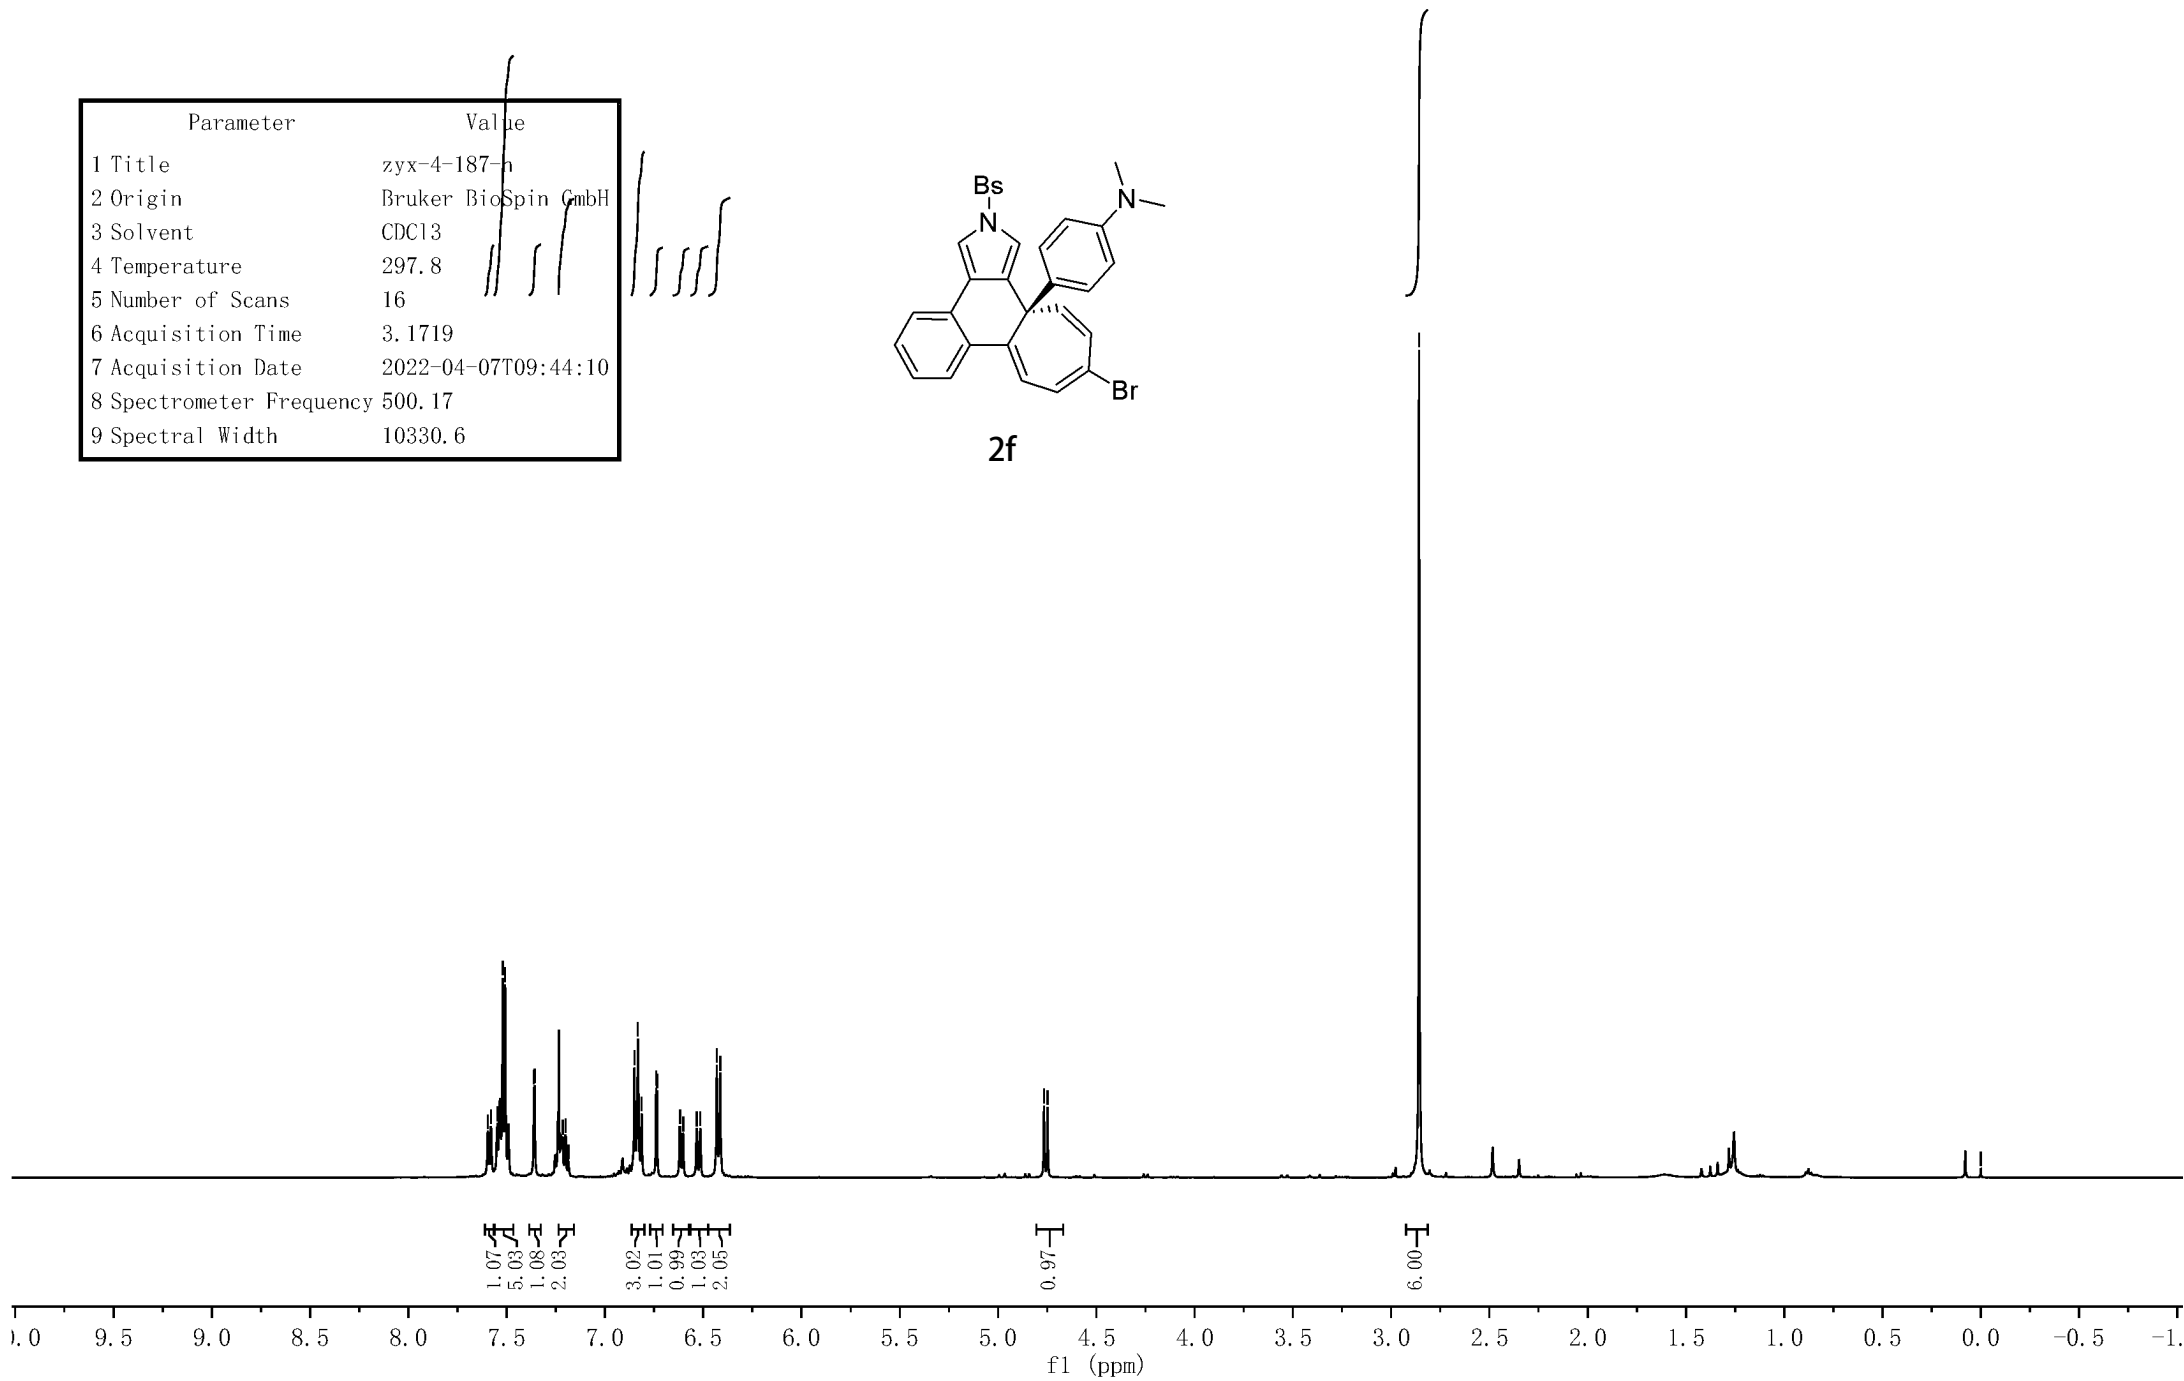



| Parameter                | Value               |
|--------------------------|---------------------|
| 1 Title                  | zyx-4-187-C         |
| 2 Origin                 | Bruker BioSpin GmbH |
| 3 Solvent                | CDCl3               |
| 4 Temperature            | 298.0               |
| 5 Number of Scans        | 40                  |
| 6 Acquisition Time       | 1.1010              |
| 7 Acquisition Date       | 2022-04-07T09:45:51 |
| 8 Spectrometer Frequency | 125.77              |
| 9 Spectral Width         | 29761.9             |

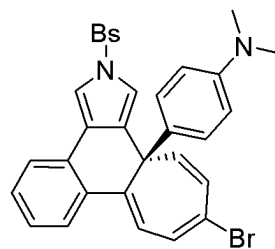

2f

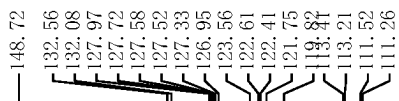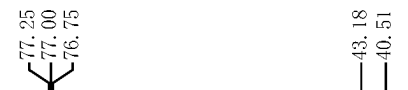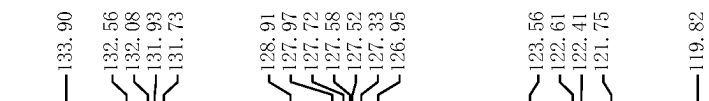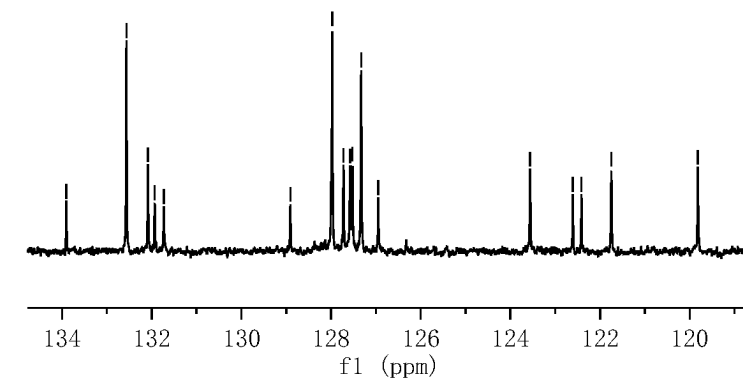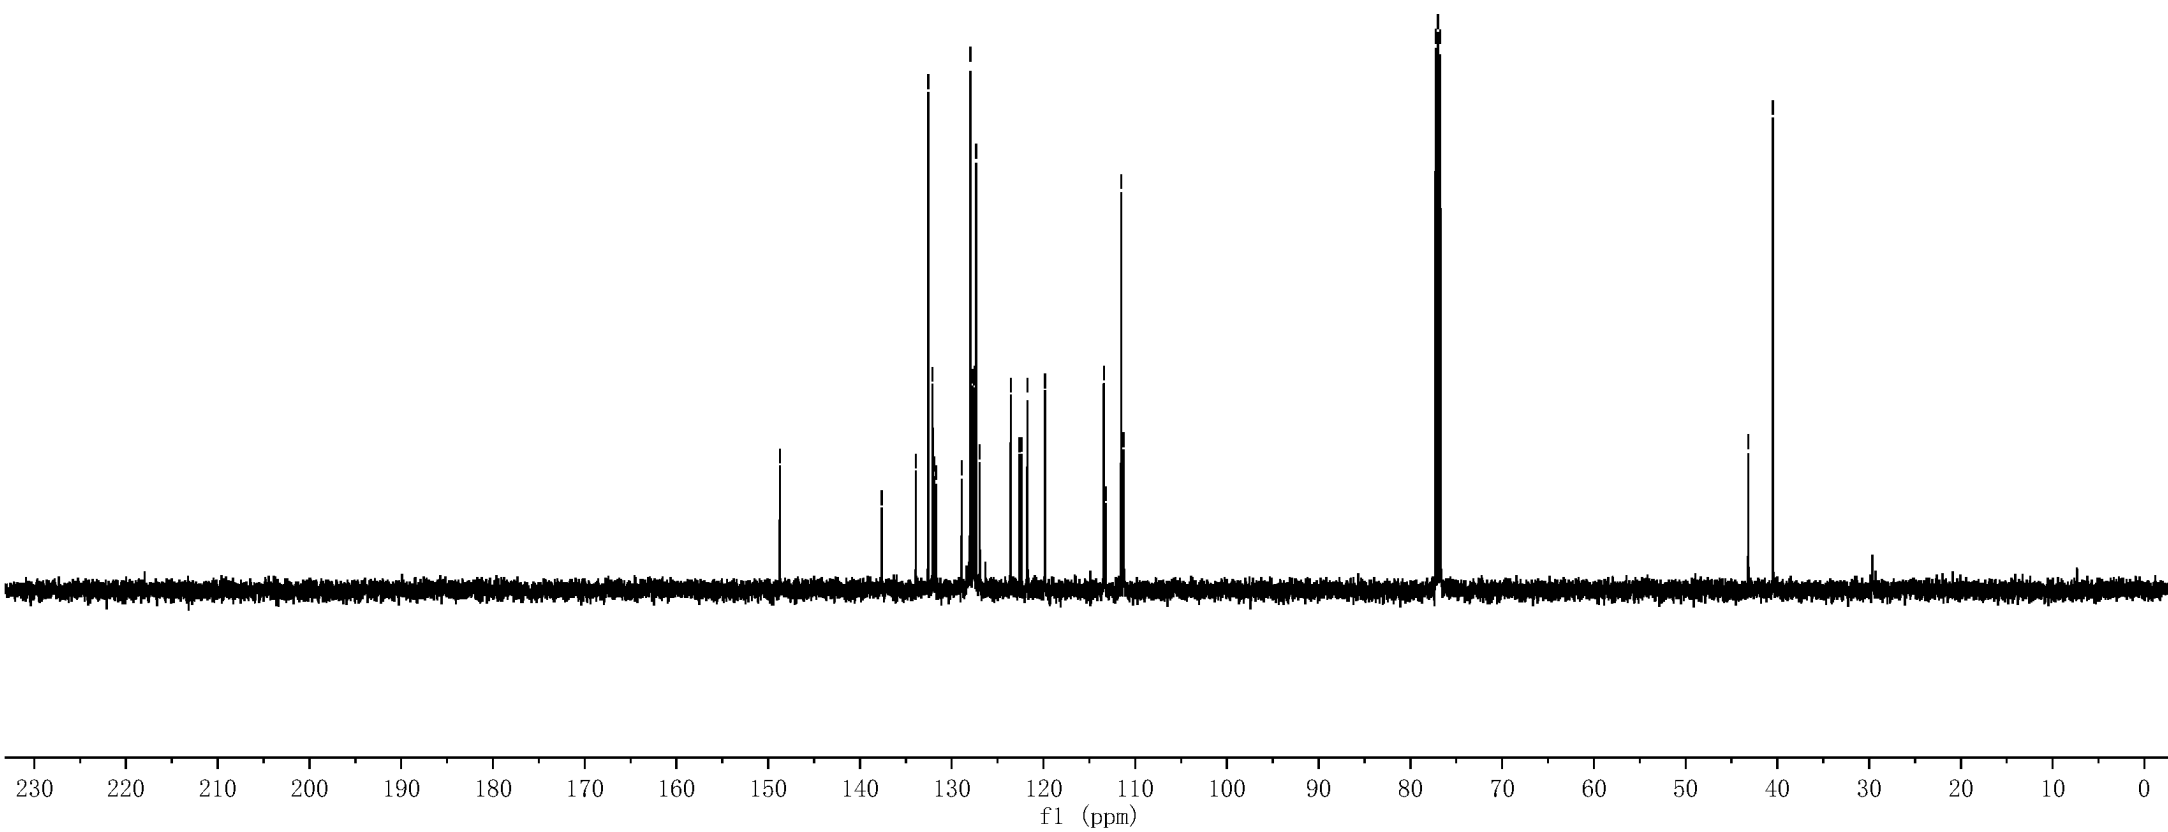

| Parameter                | Value               |
|--------------------------|---------------------|
| 1 Title                  | ZYX-4-215-H         |
| 2 Origin                 | Bruker BioSpin GmbH |
| 3 Solvent                | CDCl3               |
| 4 Temperature            | 295.4               |
| 5 Number of Scans        | 13                  |
| 6 Acquisition Time       | 3.9846              |
| 7 Acquisition Date       | 2022-04-14T14:11:36 |
| 8 Spectrometer Frequency | 399.93              |
| 9 Spectral Width         | 8223.7              |

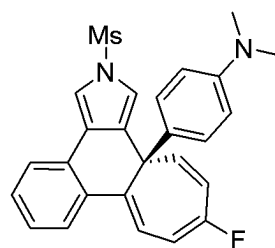

2g

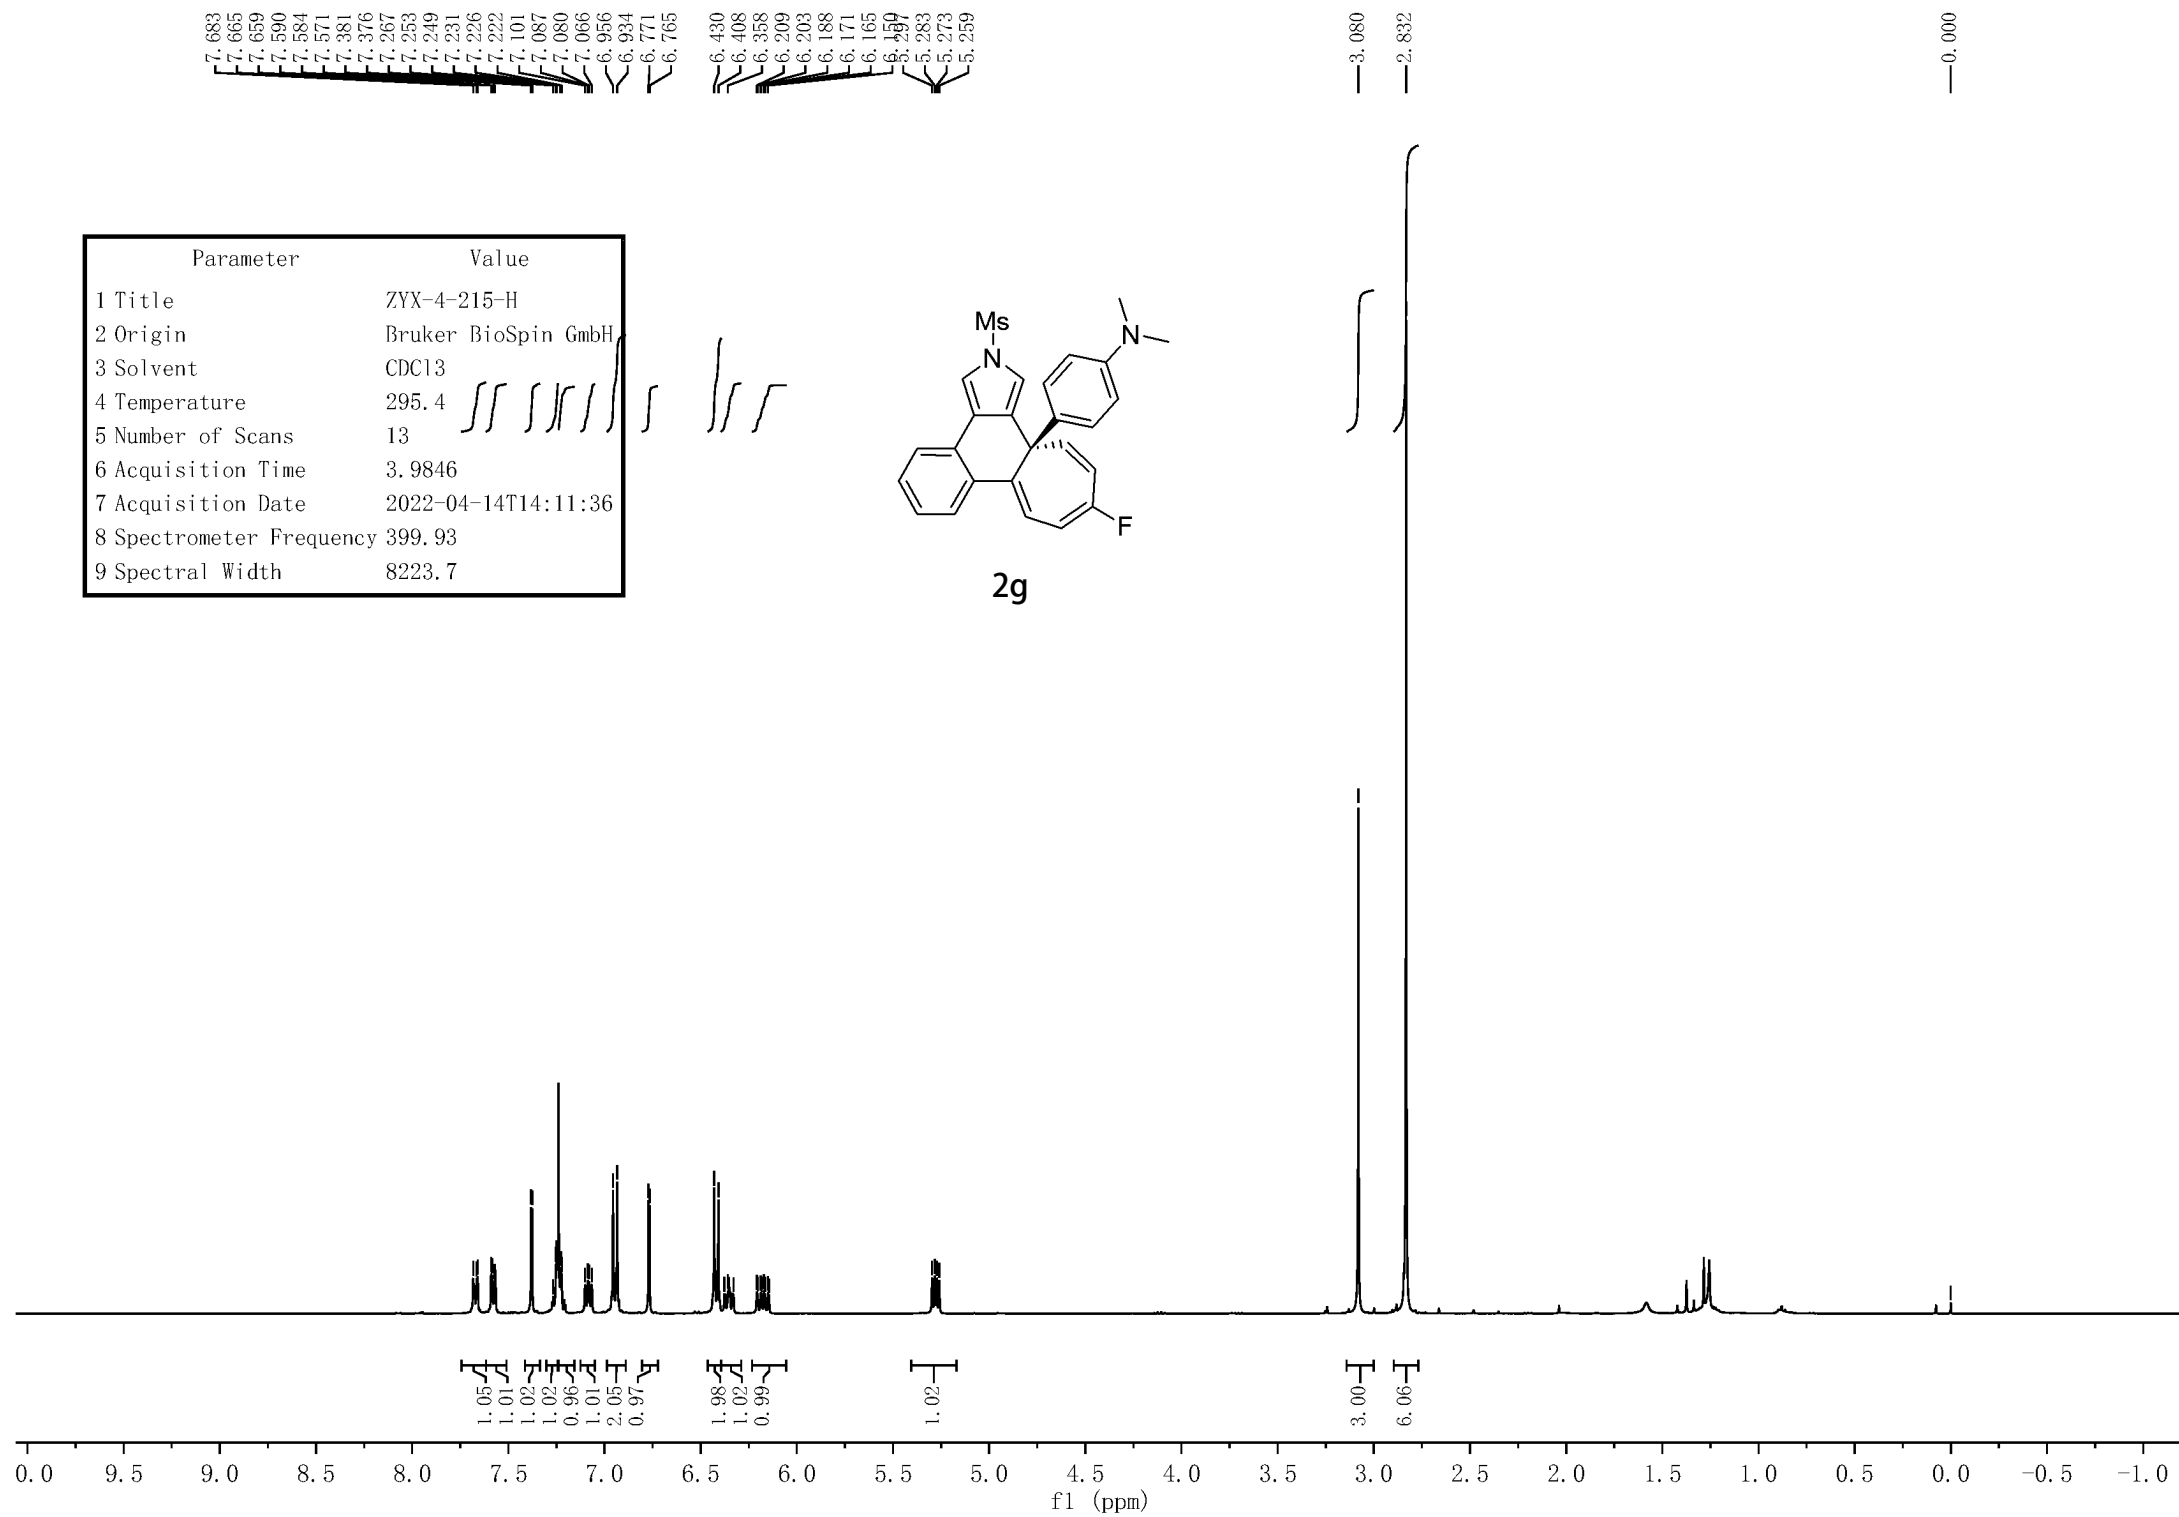

| Parameter                | Value               |
|--------------------------|---------------------|
| 1 Title                  | ZYX-4-215-C         |
| 2 Origin                 | Bruker BioSpin GmbH |
| 3 Solvent                | CDC13               |
| 4 Temperature            | 295.7               |
| 5 Number of Scans        | 106                 |
| 6 Acquisition Time       | 1.3631              |
| 7 Acquisition Date       | 2022-04-14T14:14:30 |
| 8 Spectrometer Frequency | 100.56              |
| 9 Spectral Width         | 24038.5             |

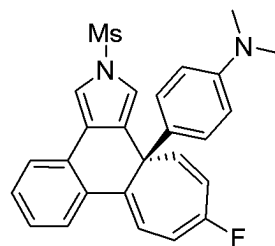

2g

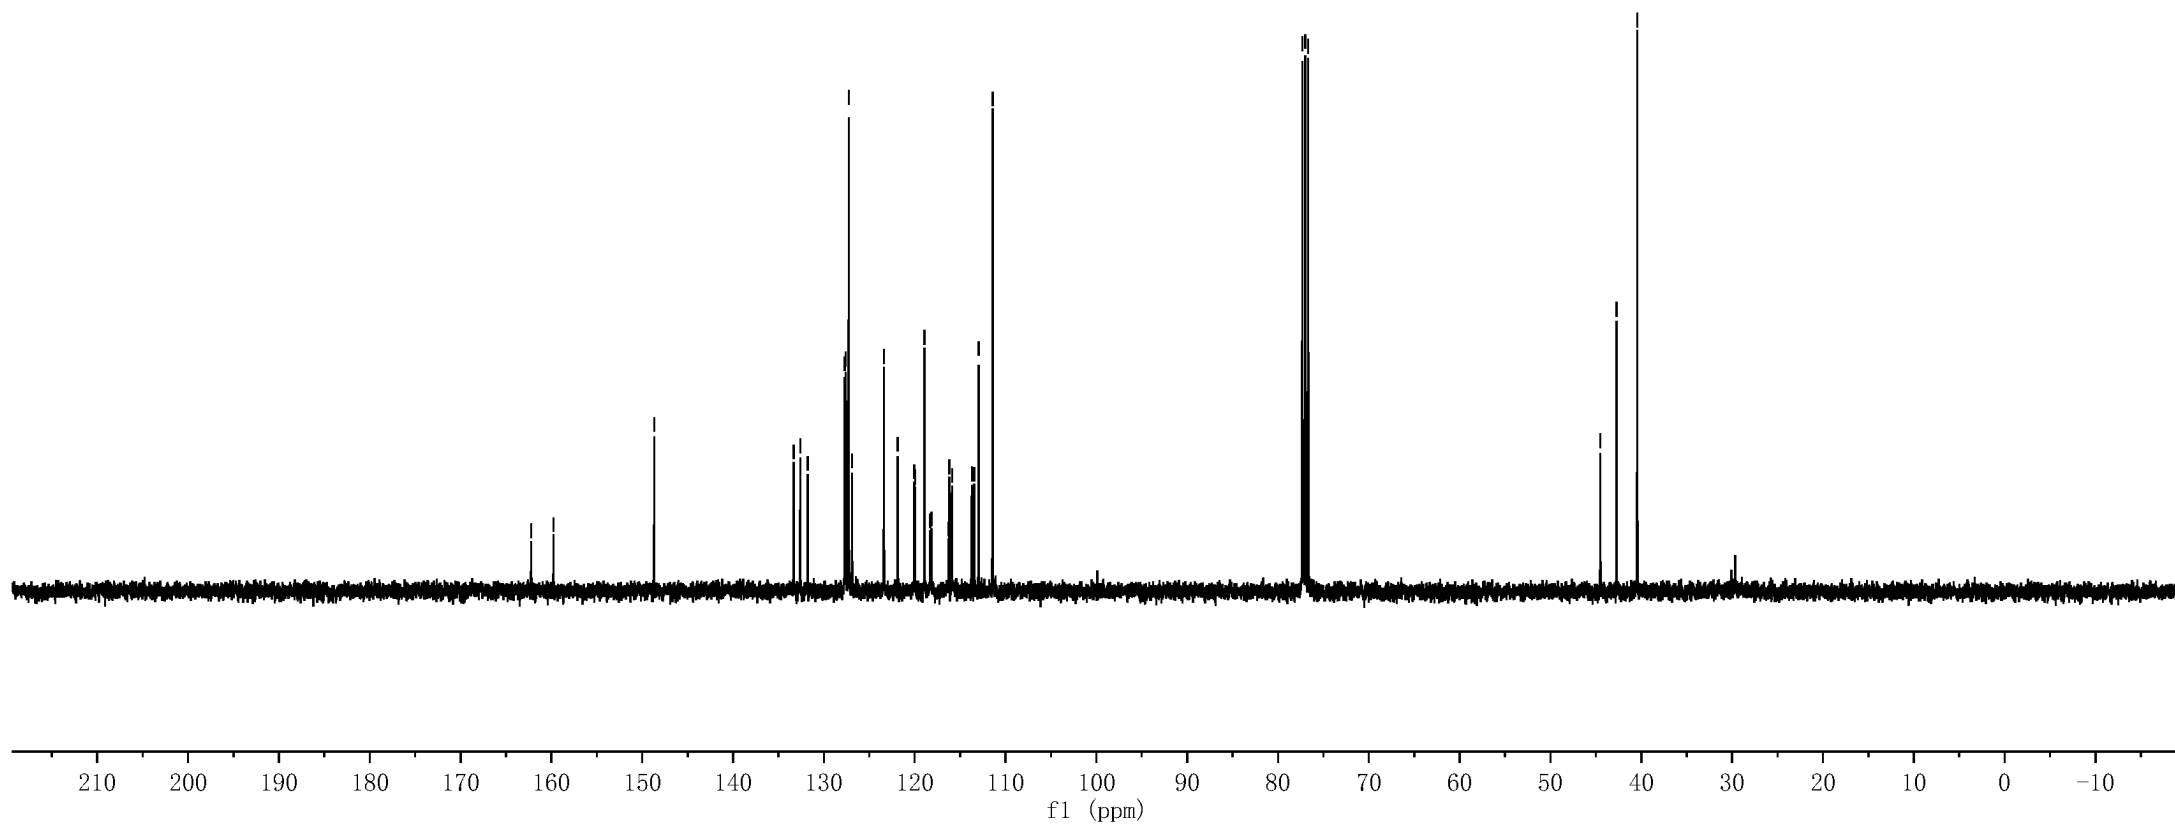

162.23  
159.77  
148.68  
133.34  
132.60  
131.78  
127.72  
127.59  
127.30  
127.26  
126.89  
123.39  
121.89  
120.07  
119.96  
118.92  
118.29  
118.16  
116.26  
116.23  
116.20  
115.89  
113.71  
113.43  
112.96  
111.43

77.32  
77.00  
76.68

44.52  
42.74  
40.45

133.34  
132.60  
131.78

127.72  
127.59  
127.30  
127.26  
126.89

123.39

121.89

120.07

119.96

118.92

118.29

118.16

116.26

116.23

116.20

115.89

113.71

113.43

112.96

111.43

130 125 120 115  
f1 (ppm)

210 200 190 180 170 160 150 140 130 120 110 100 90 80 70 60 50 40 30 20 10 0 -10  
f1 (ppm)

| Parameter                | Value               |
|--------------------------|---------------------|
| 1 Title                  | ZYX-4-215-F         |
| 2 Origin                 | Bruker BioSpin GmbH |
| 3 Solvent                | CDCl3               |
| 4 Temperature            | 295.2               |
| 5 Number of Scans        | 40                  |
| 6 Acquisition Time       | 0.7340              |
| 7 Acquisition Date       | 2022-04-14T14:06:41 |
| 8 Spectrometer Frequency | 376.31              |
| 9 Spectral Width         | 89285.7             |



2g

104.93  
104.96  
104.98  
105.02

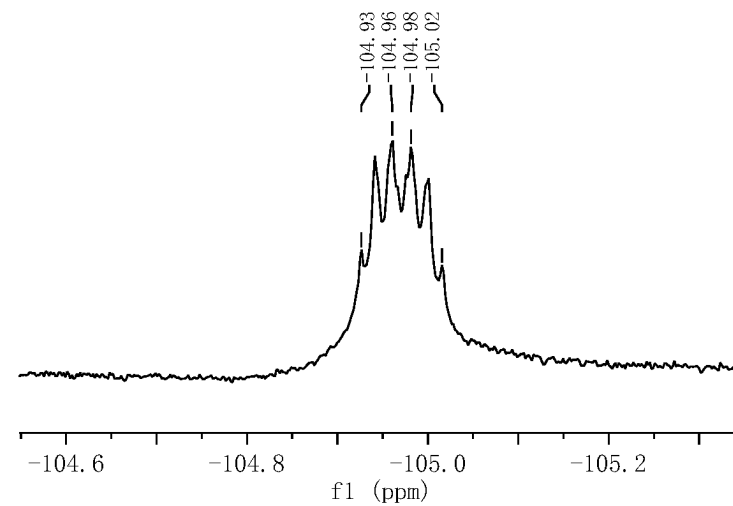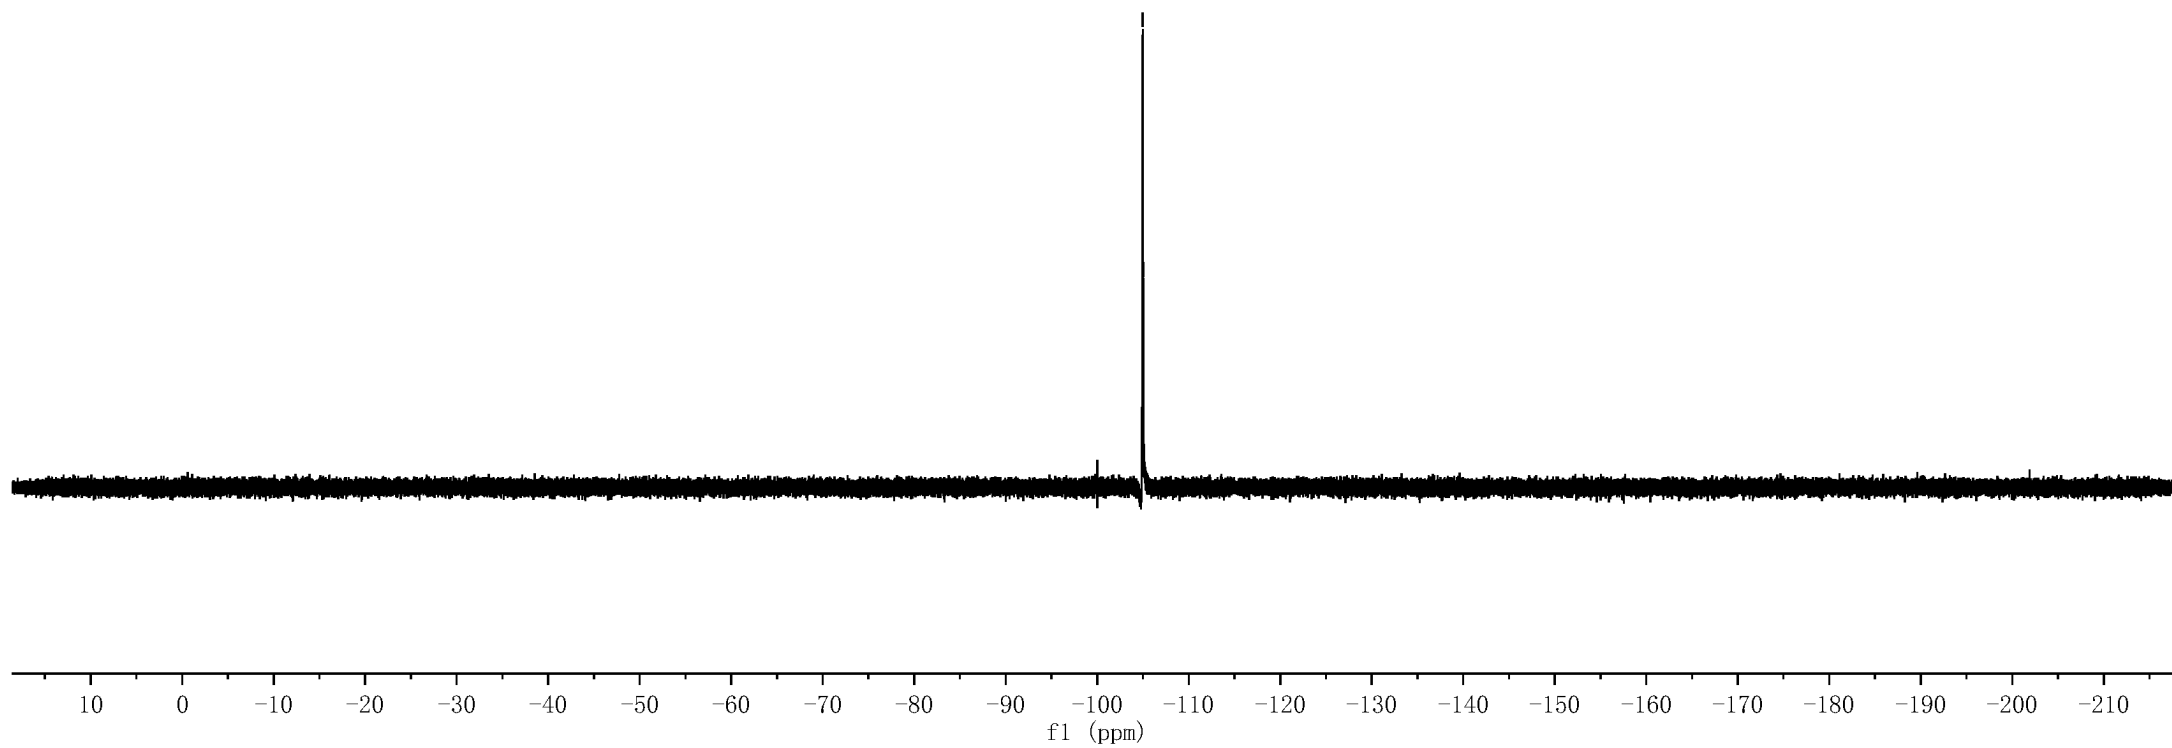

| Parameter                | Value               |
|--------------------------|---------------------|
| 1 Title                  | zyx-4-208-h         |
| 2 Origin                 | Bruker BioSpin GmbH |
| 3 Solvent                | CDCl3               |
| 4 Temperature            | 297.5               |
| 5 Number of Scans        | 15                  |
| 6 Acquisition Time       | 3.1719              |
| 7 Acquisition Date       | 2022-04-13T21:38:34 |
| 8 Spectrometer Frequency | 500.17              |
| 9 Spectral Width         | 10330.6             |

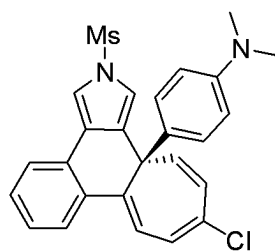

2h

7.630  
7.615  
7.613  
7.594  
7.389  
7.284  
7.269  
7.255  
6.926  
6.908  
6.724  
6.700  
6.458  
6.438  
6.423  
6.404  
6.385

4.805  
4.787

3.085  
2.850

0.000

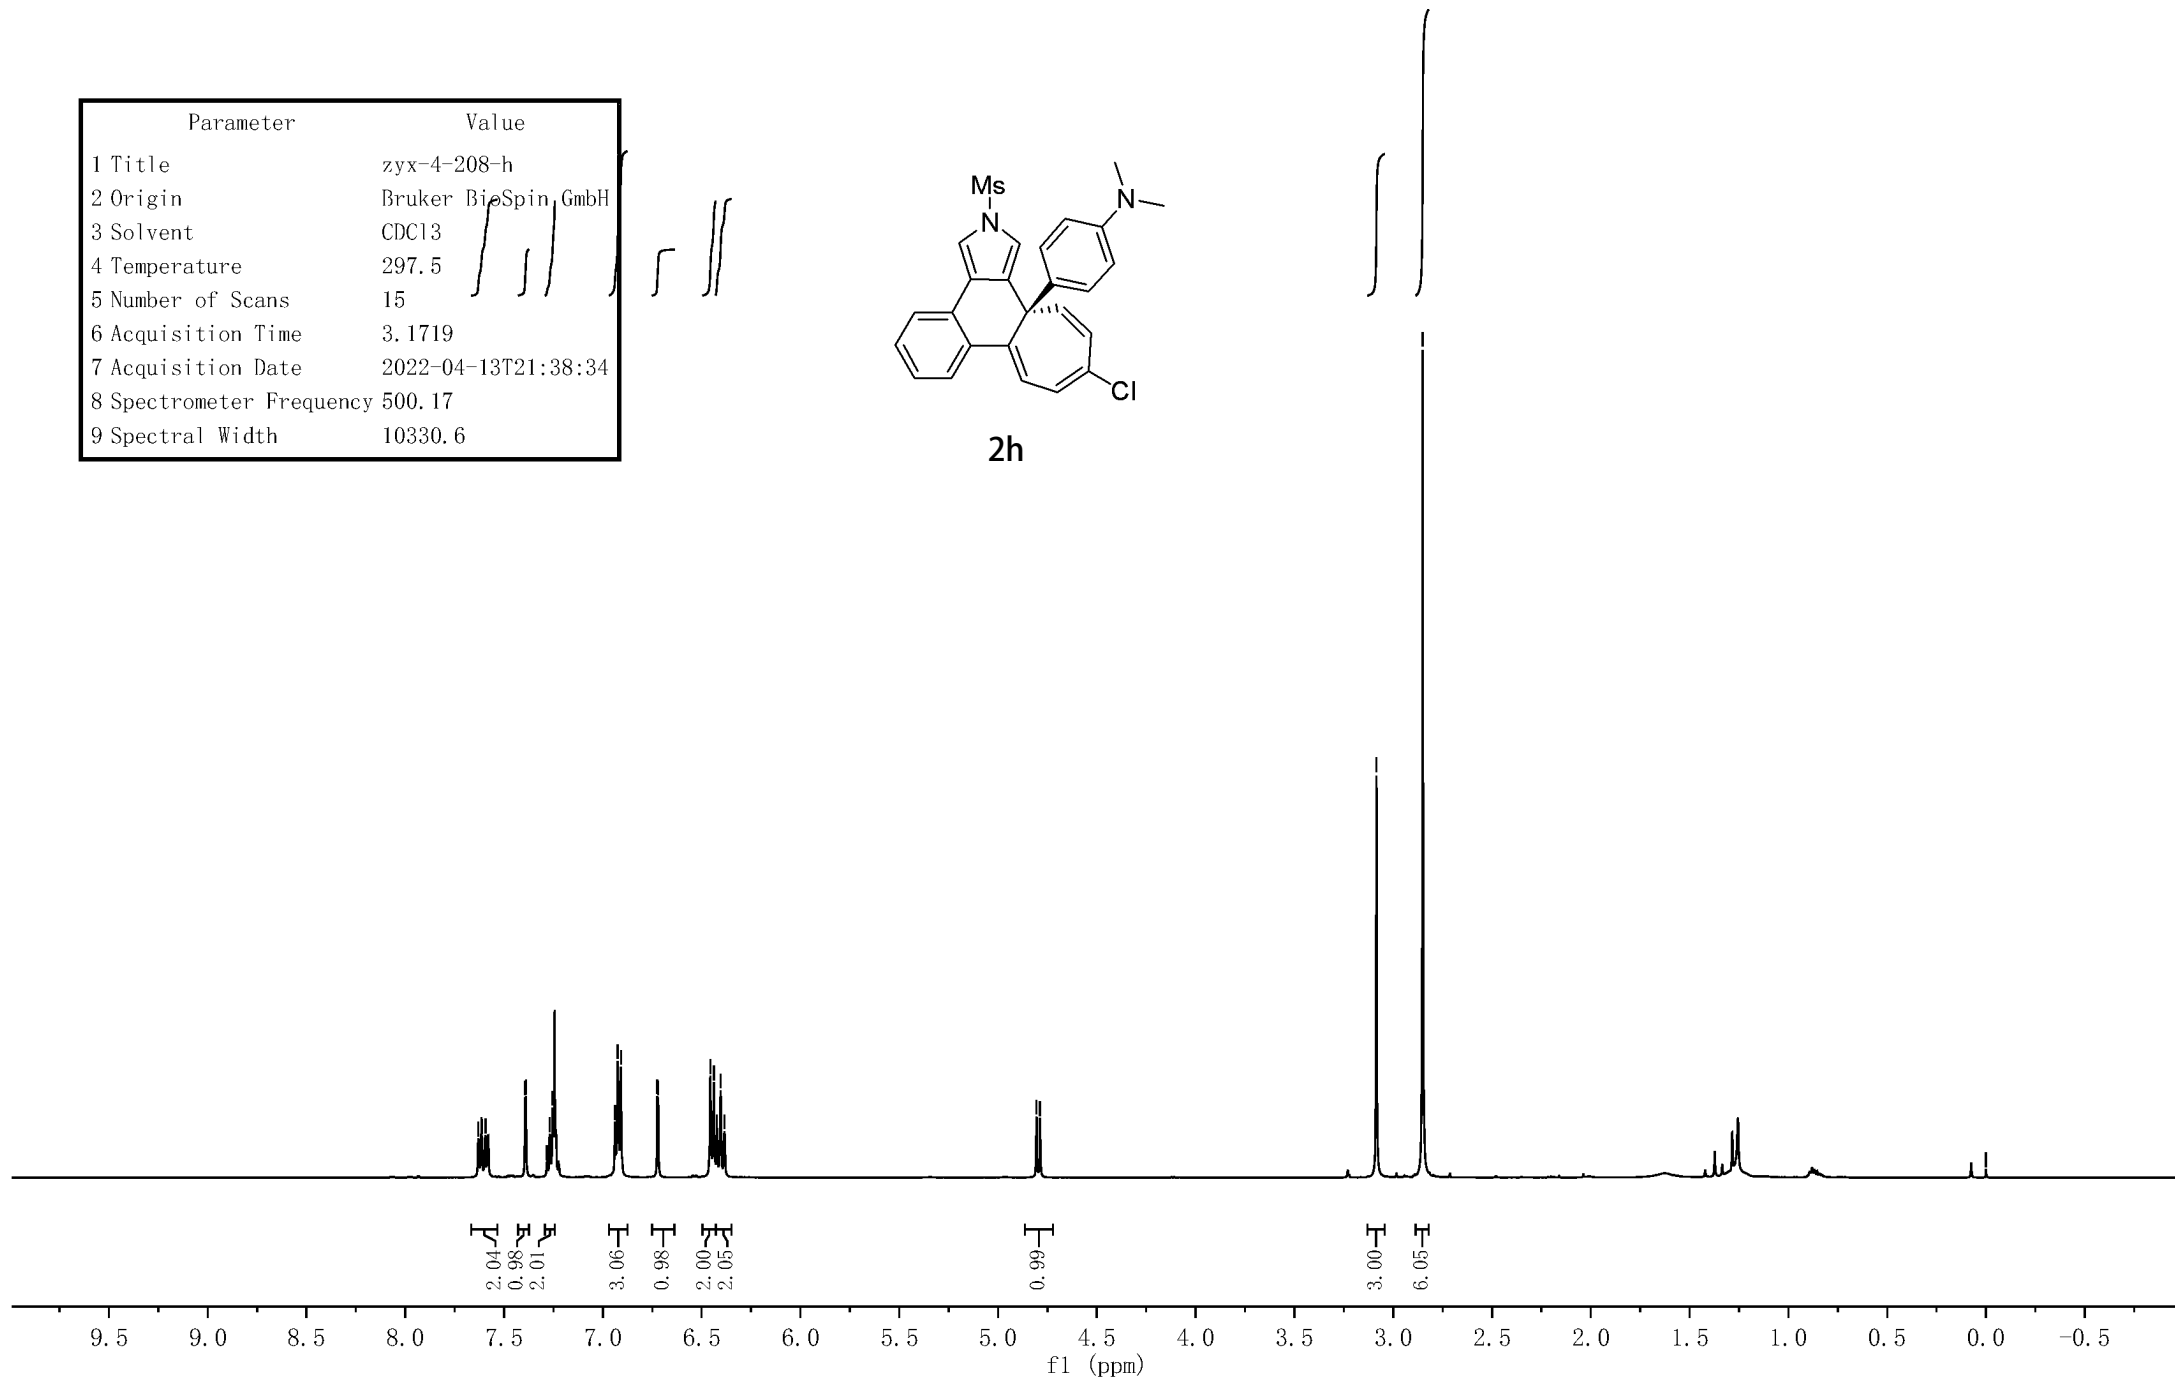

| Parameter                | Value               |
|--------------------------|---------------------|
| 1 Title                  | zyx-4-208-cc        |
| 2 Origin                 | Bruker BioSpin GmbH |
| 3 Solvent                | CDCl3               |
| 4 Temperature            | 298.1               |
| 5 Number of Scans        | 64                  |
| 6 Acquisition Time       | 1.1010              |
| 7 Acquisition Date       | 2022-04-13T21:46:34 |
| 8 Spectrometer Frequency | 125.77              |
| 9 Spectral Width         | 29761.9             |

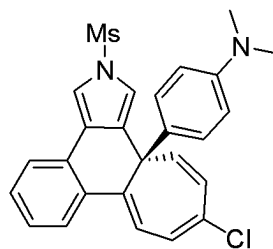

2h

148.71  
132.80  
132.66  
132.09  
128.83  
127.92  
127.78  
127.70  
127.59  
126.99  
124.76  
123.40  
121.72  
121.59  
118.95  
111.52  
108.14

77.25  
77.00  
76.75

42.76  
42.39  
40.48

132.80  
132.66  
132.09  
131.41

128.83  
127.92  
127.78  
127.70  
127.59  
126.99

124.76

123.40

121.72  
121.59

118.95

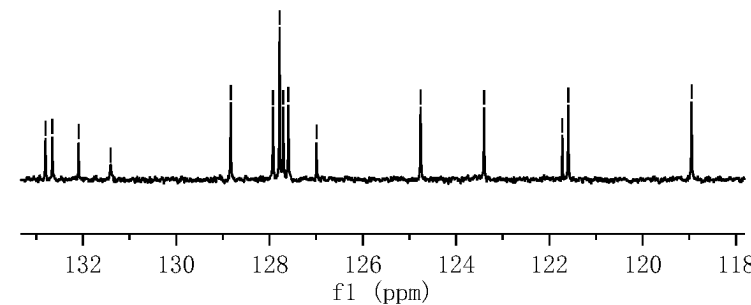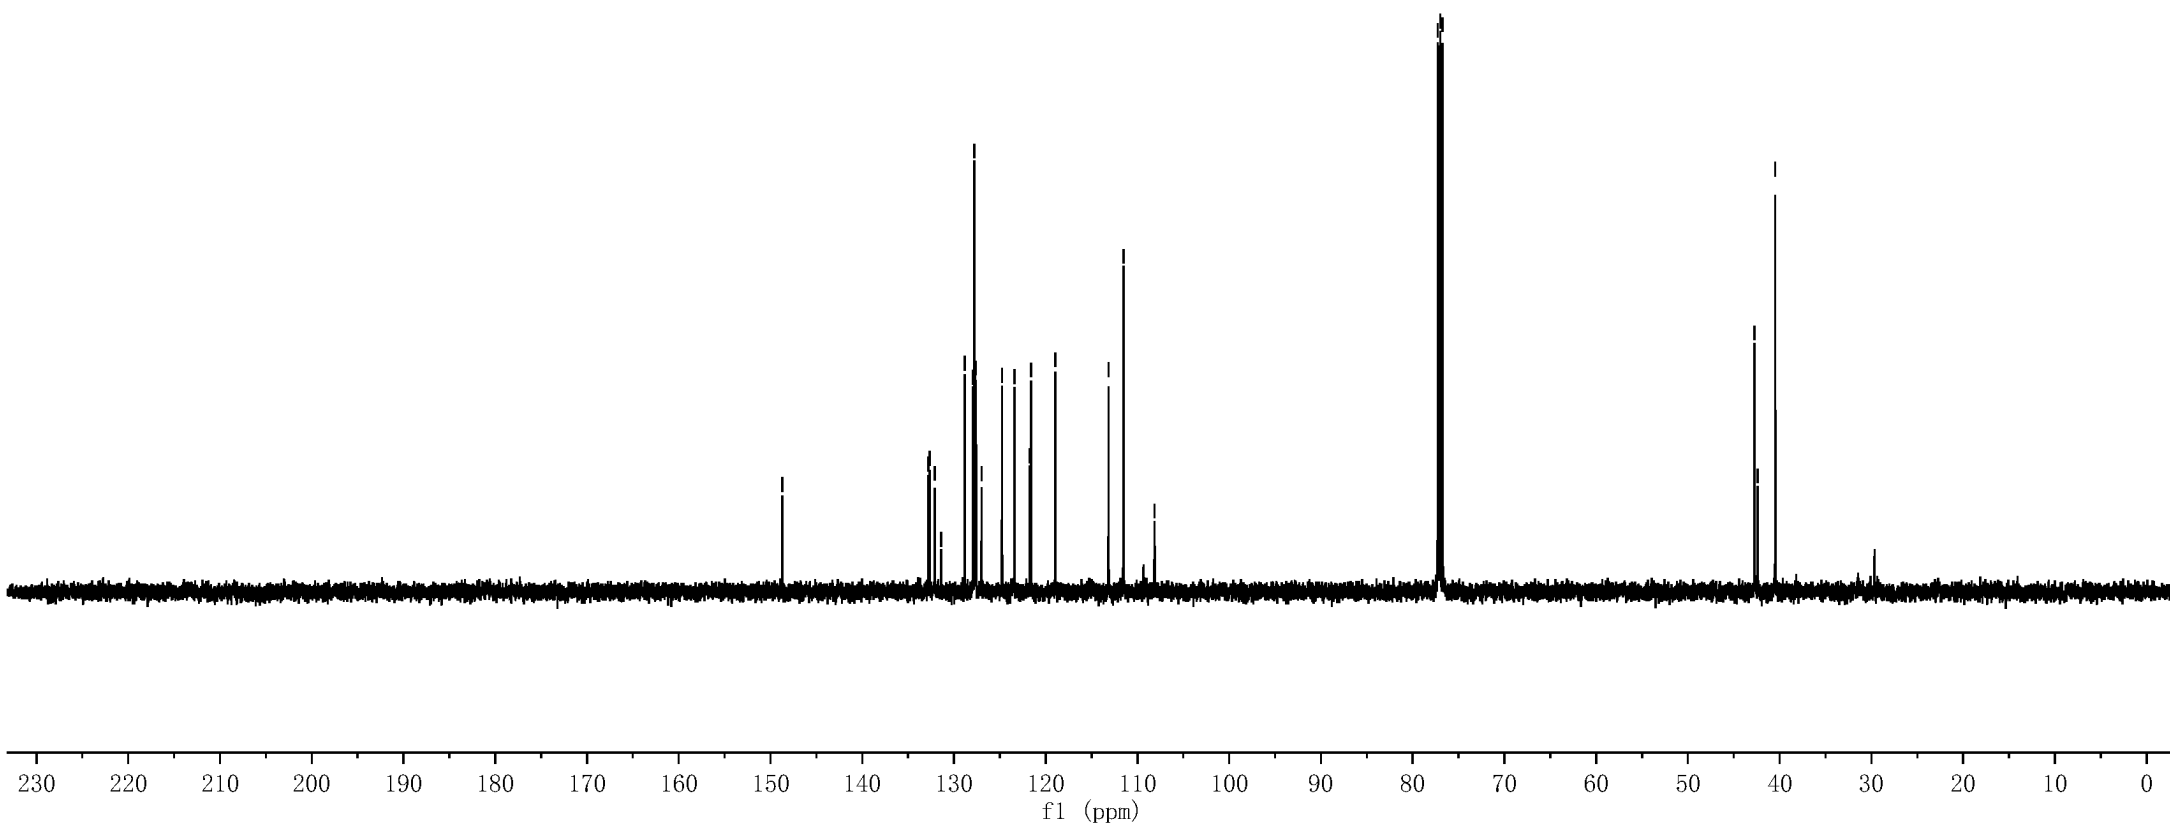

| Parameter                | Value               |
|--------------------------|---------------------|
| 1 Title                  | zyx-11-89-p2        |
| 2 Origin                 |                     |
| 3 Solvent                | CDC13               |
| 4 Temperature            | 296.8               |
| 5 Number of Scans        | 16                  |
| 6 Acquisition Time       | 4.0002              |
| 7 Acquisition Date       | 2023-11-26T00:43:24 |
| 8 Spectrometer Frequency | 399.90              |
| 9 Spectral Width         | 8012.0              |

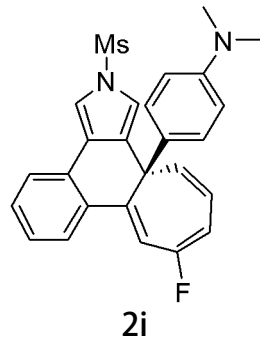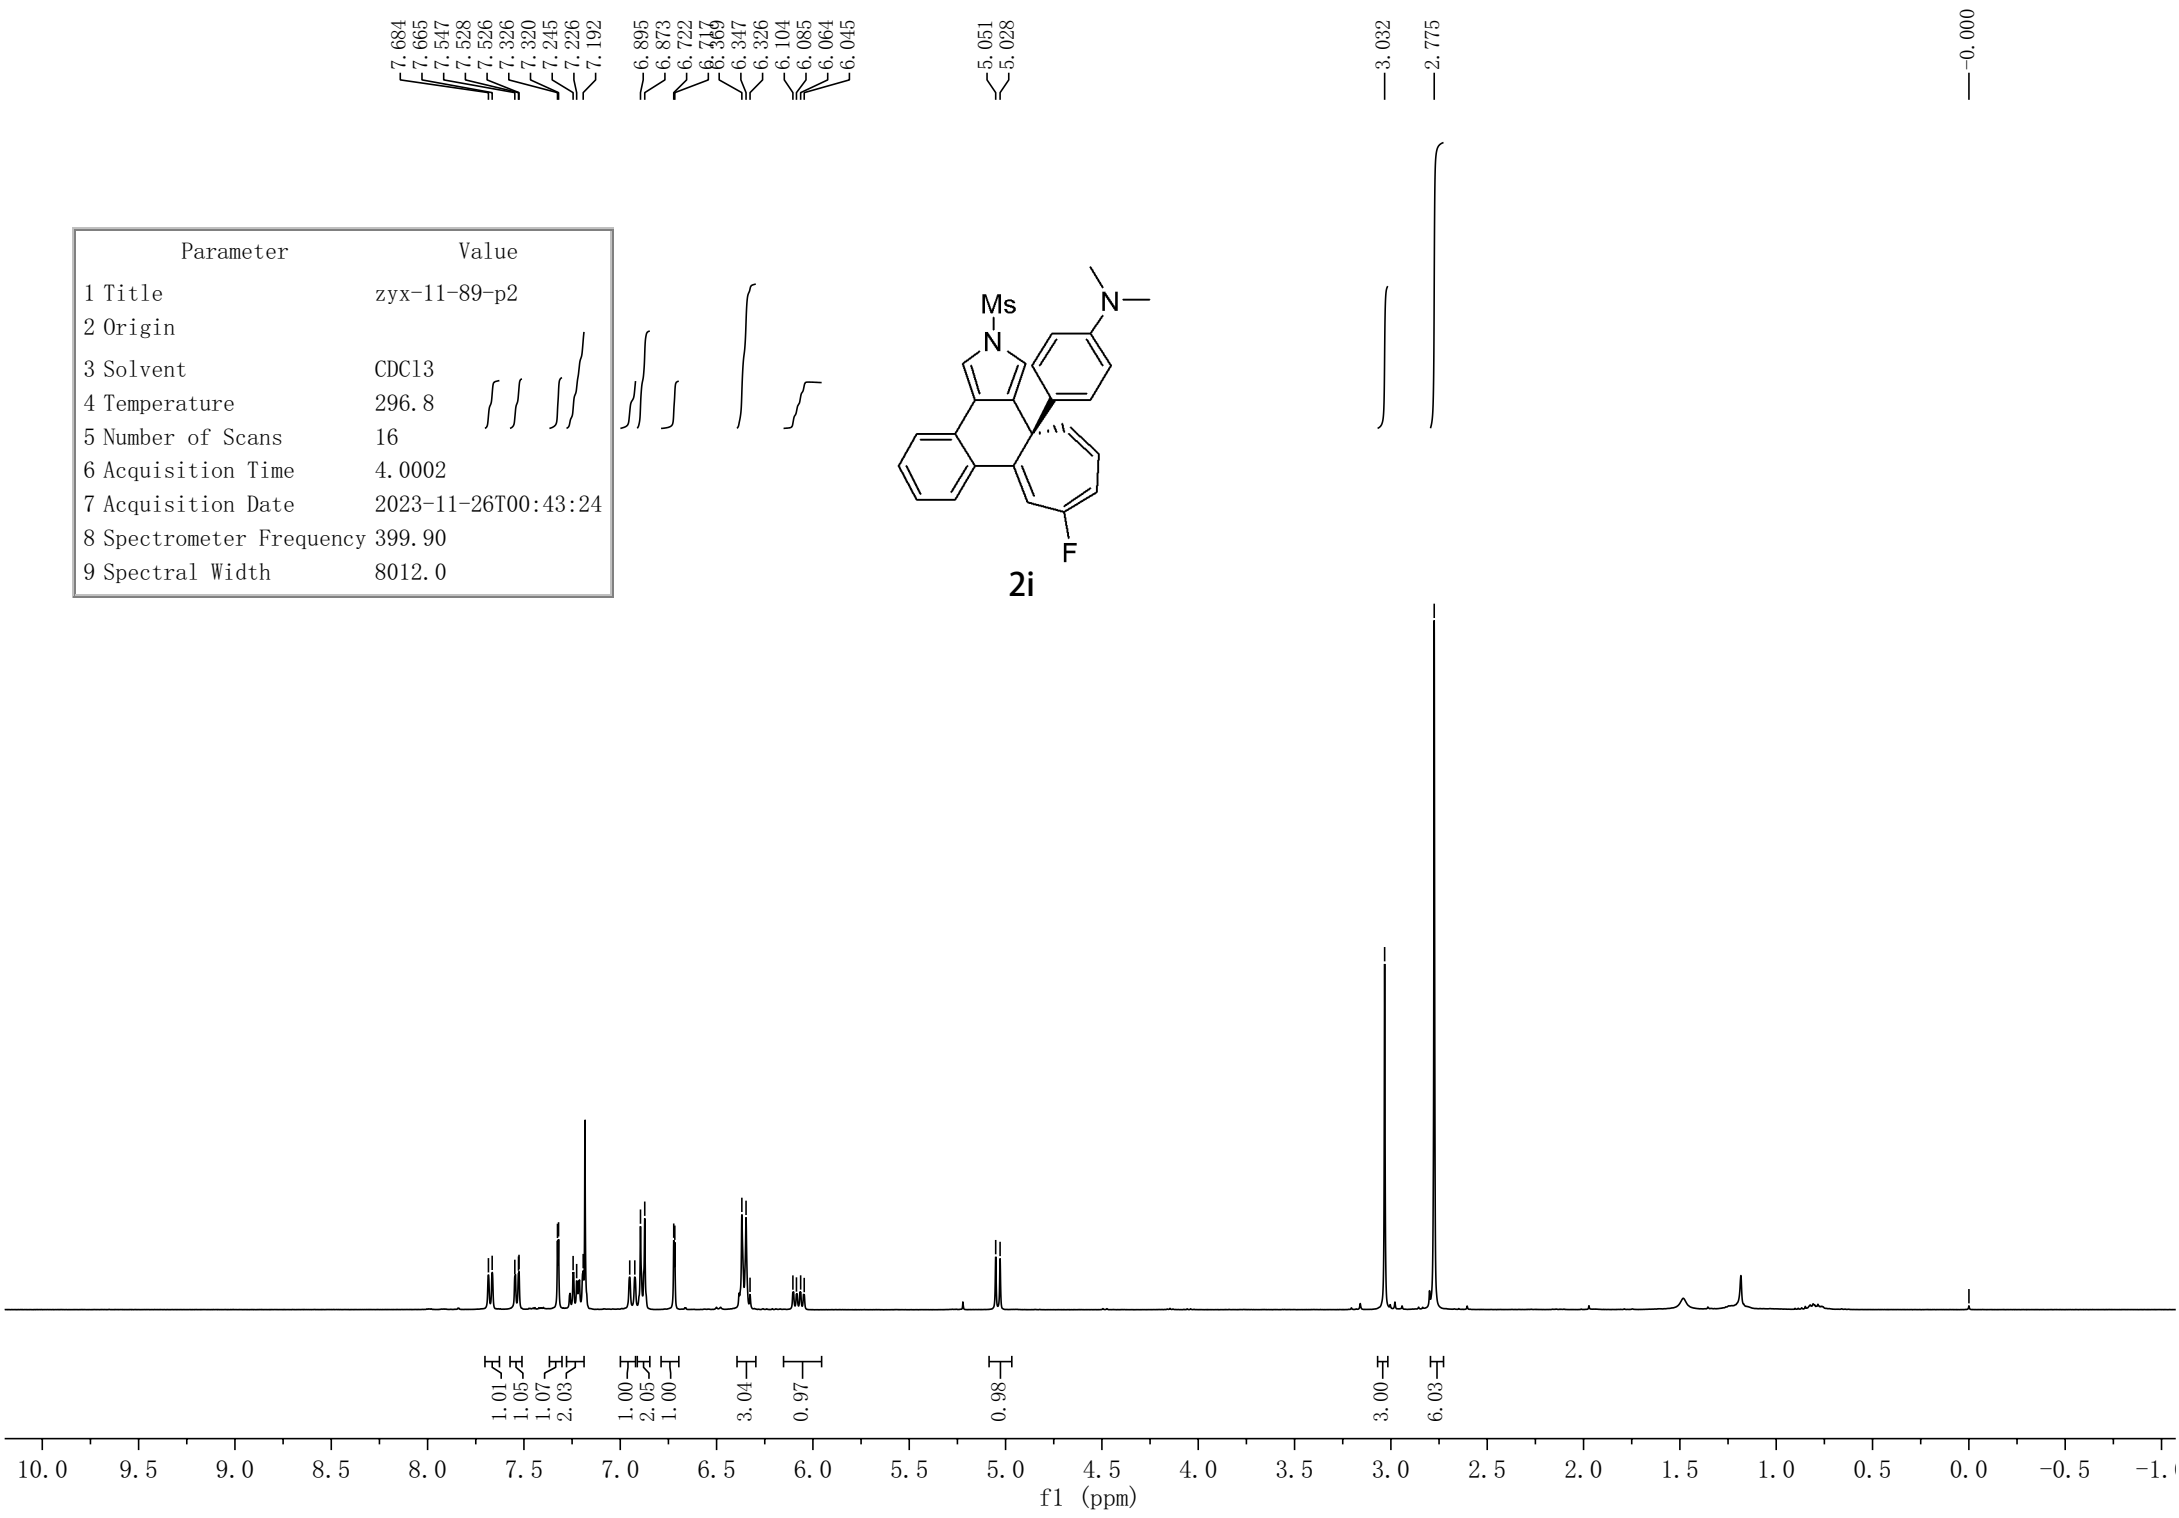

| Parameter                | Value               |
|--------------------------|---------------------|
| 1 Title                  | zyx-11-89-p2-c      |
| 2 Origin                 |                     |
| 3 Solvent                | CDC13               |
| 4 Temperature            | 297.6               |
| 5 Number of Scans        | 1024                |
| 6 Acquisition Time       | 1.0000              |
| 7 Acquisition Date       | 2023-11-26T19:53:32 |
| 8 Spectrometer Frequency | 100.56              |
| 9 Spectral Width         | 26041.0             |

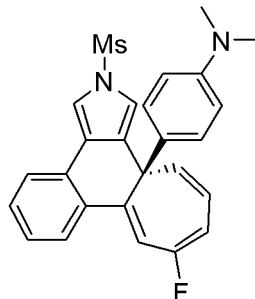

2i

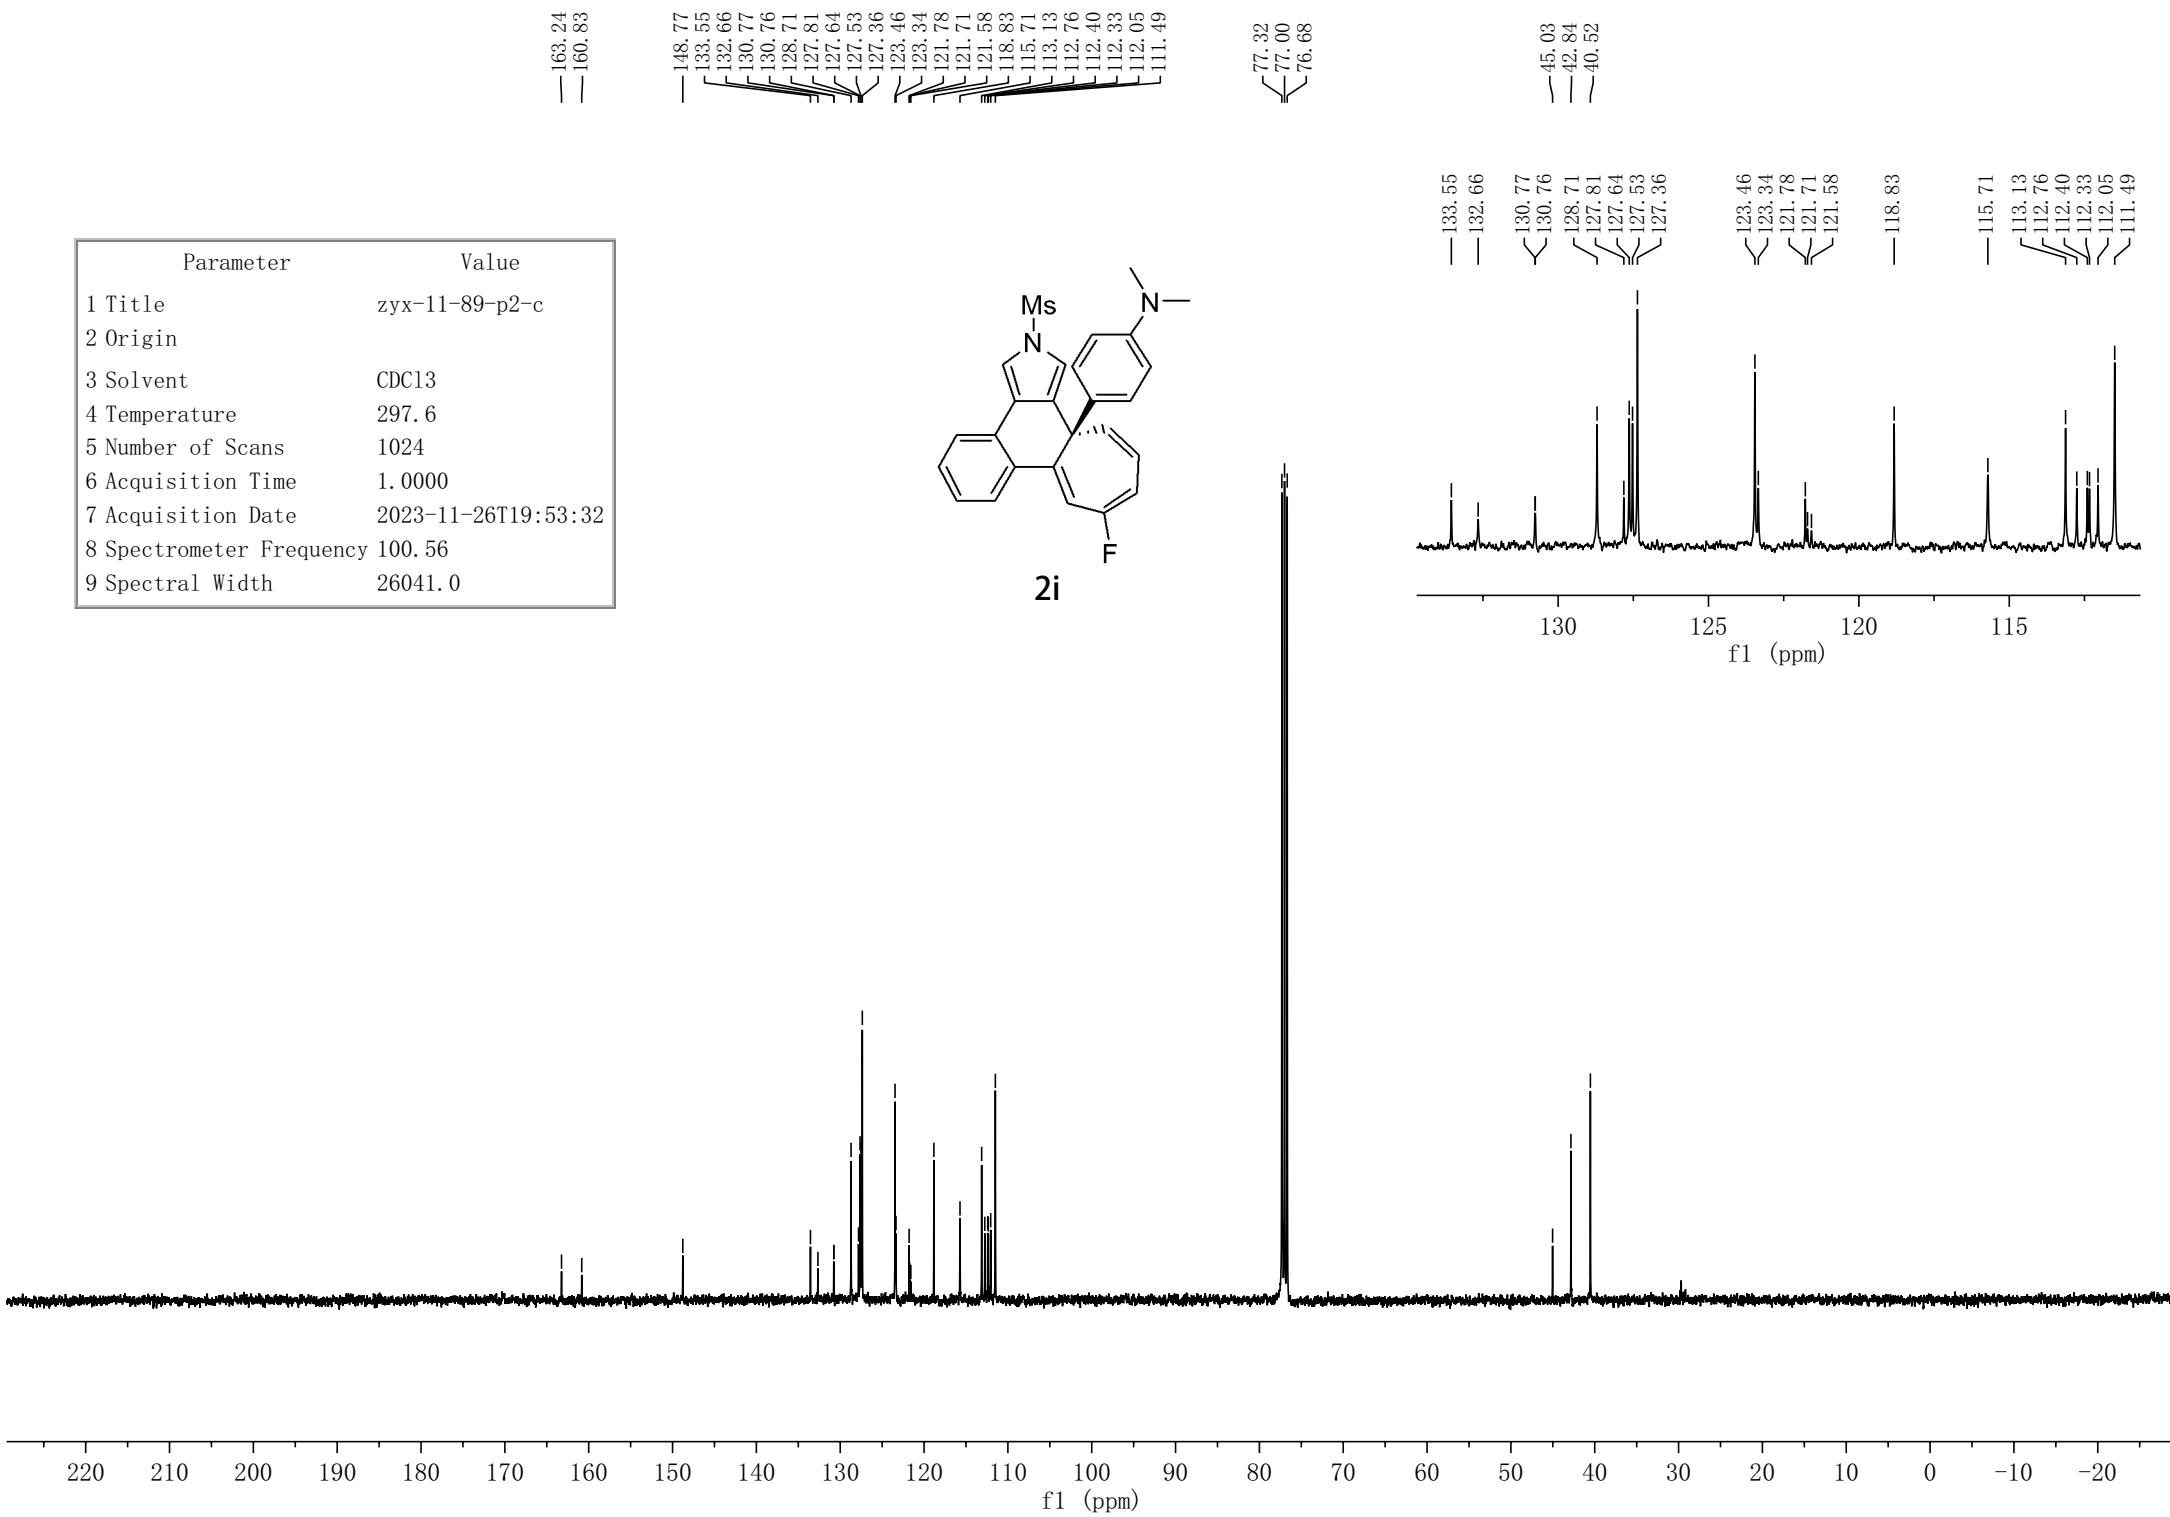



128.70  
127.63  
127.52  
127.36  
123.45  
123.34  
118.83  
115.70  
113.13  
112.75  
112.40  
112.05  
111.49

77.20

42.81  
40.55

| Parameter                | Value               |
|--------------------------|---------------------|
| 1 Title                  | zyx-11-89-c         |
| 2 Origin                 |                     |
| 3 Solvent                | CDC13               |
| 4 Temperature            | 297.9               |
| 5 Number of Scans        | 480                 |
| 6 Acquisition Time       | 1.0001              |
| 7 Acquisition Date       | 2023-11-26T20:20:57 |
| 8 Spectrometer Frequency | 100.56              |
| 9 Spectral Width         | 18028.0             |

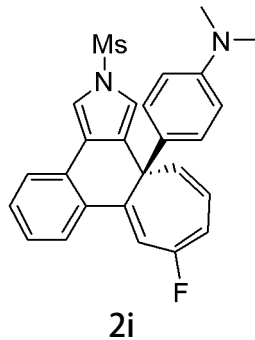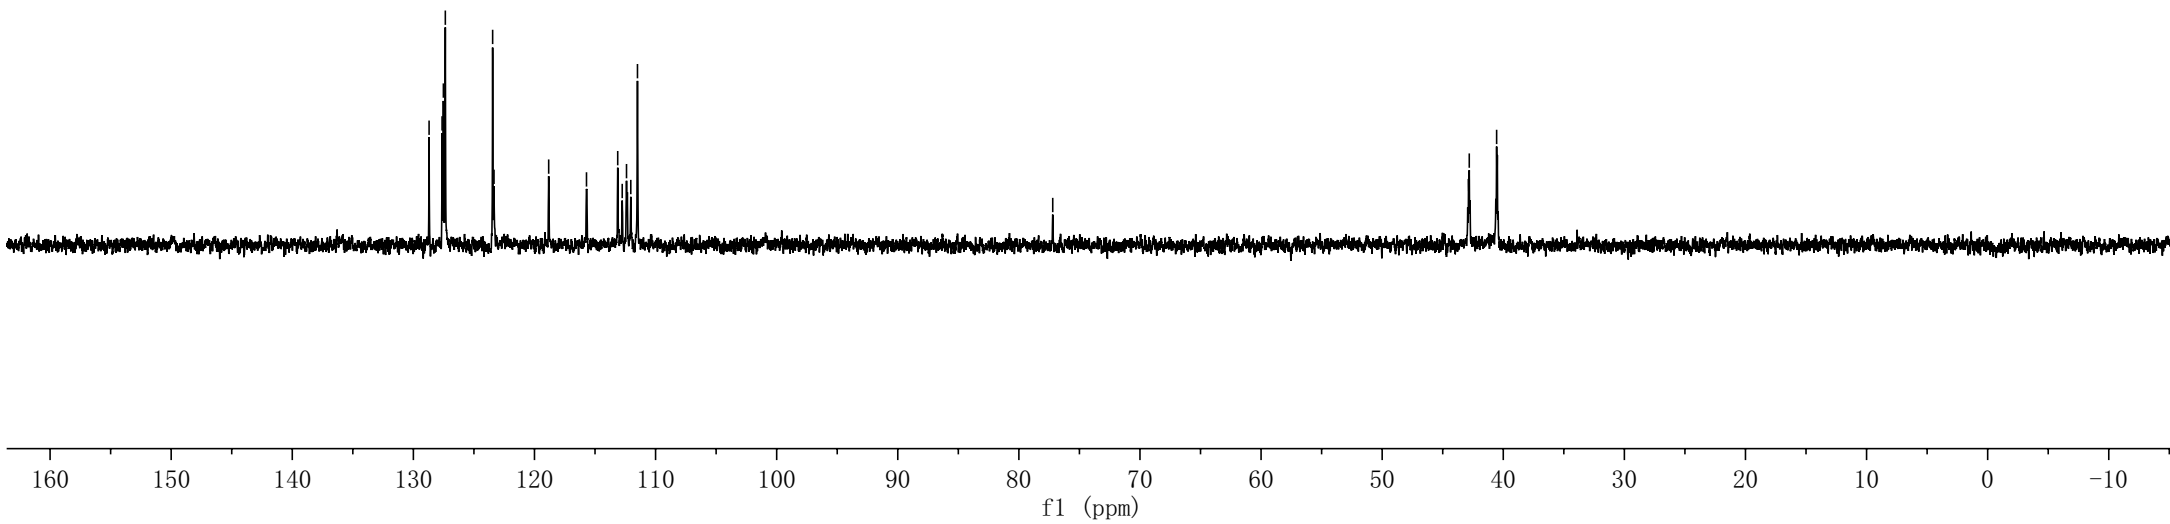

| Parameter                | Value               |
|--------------------------|---------------------|
| 1 Title                  | zyx-11-74-2-f       |
| 2 Origin                 |                     |
| 3 Solvent                | CDC13               |
| 4 Temperature            | 296.8               |
| 5 Number of Scans        | 16                  |
| 6 Acquisition Time       | 1.0000              |
| 7 Acquisition Date       | 2023-11-21T16:41:32 |
| 8 Spectrometer Frequency | 376.28              |
| 9 Spectral Width         | 96153.0             |

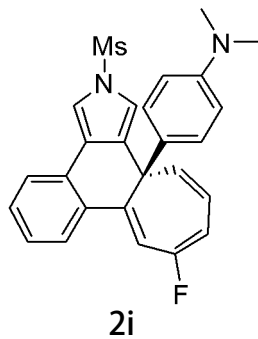

-101.09  
-101.13  
-101.18

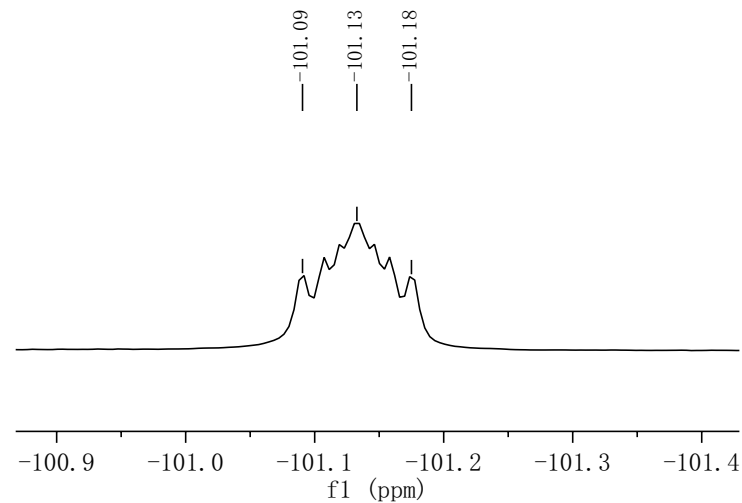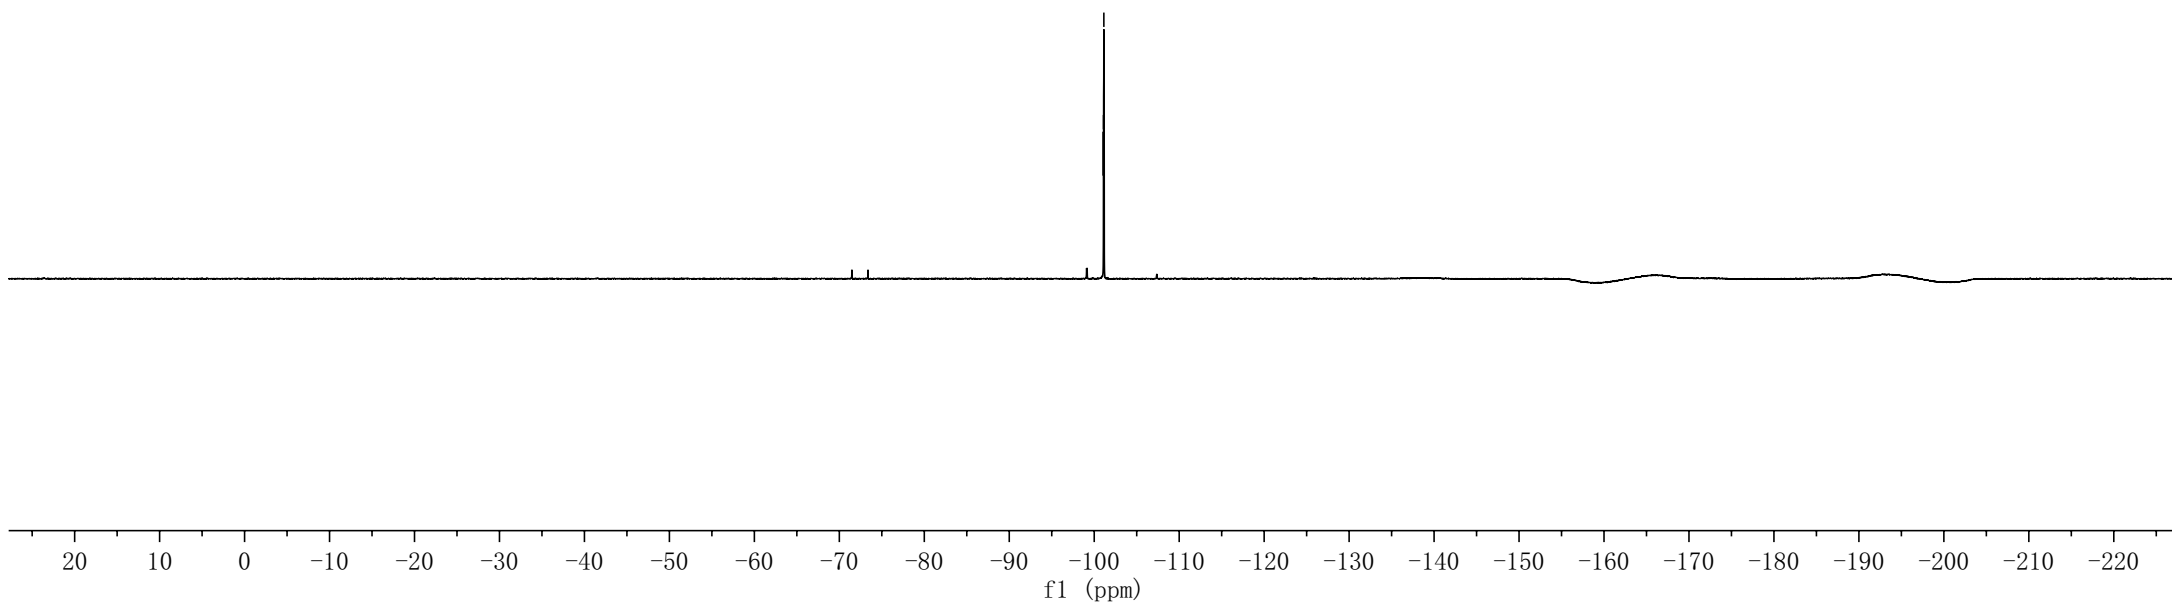

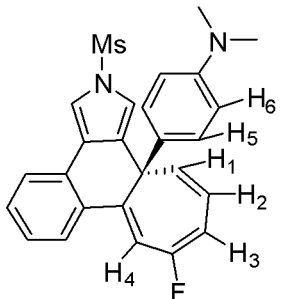

2i (COSY)  
CDCl<sub>3</sub>, 600 MHz

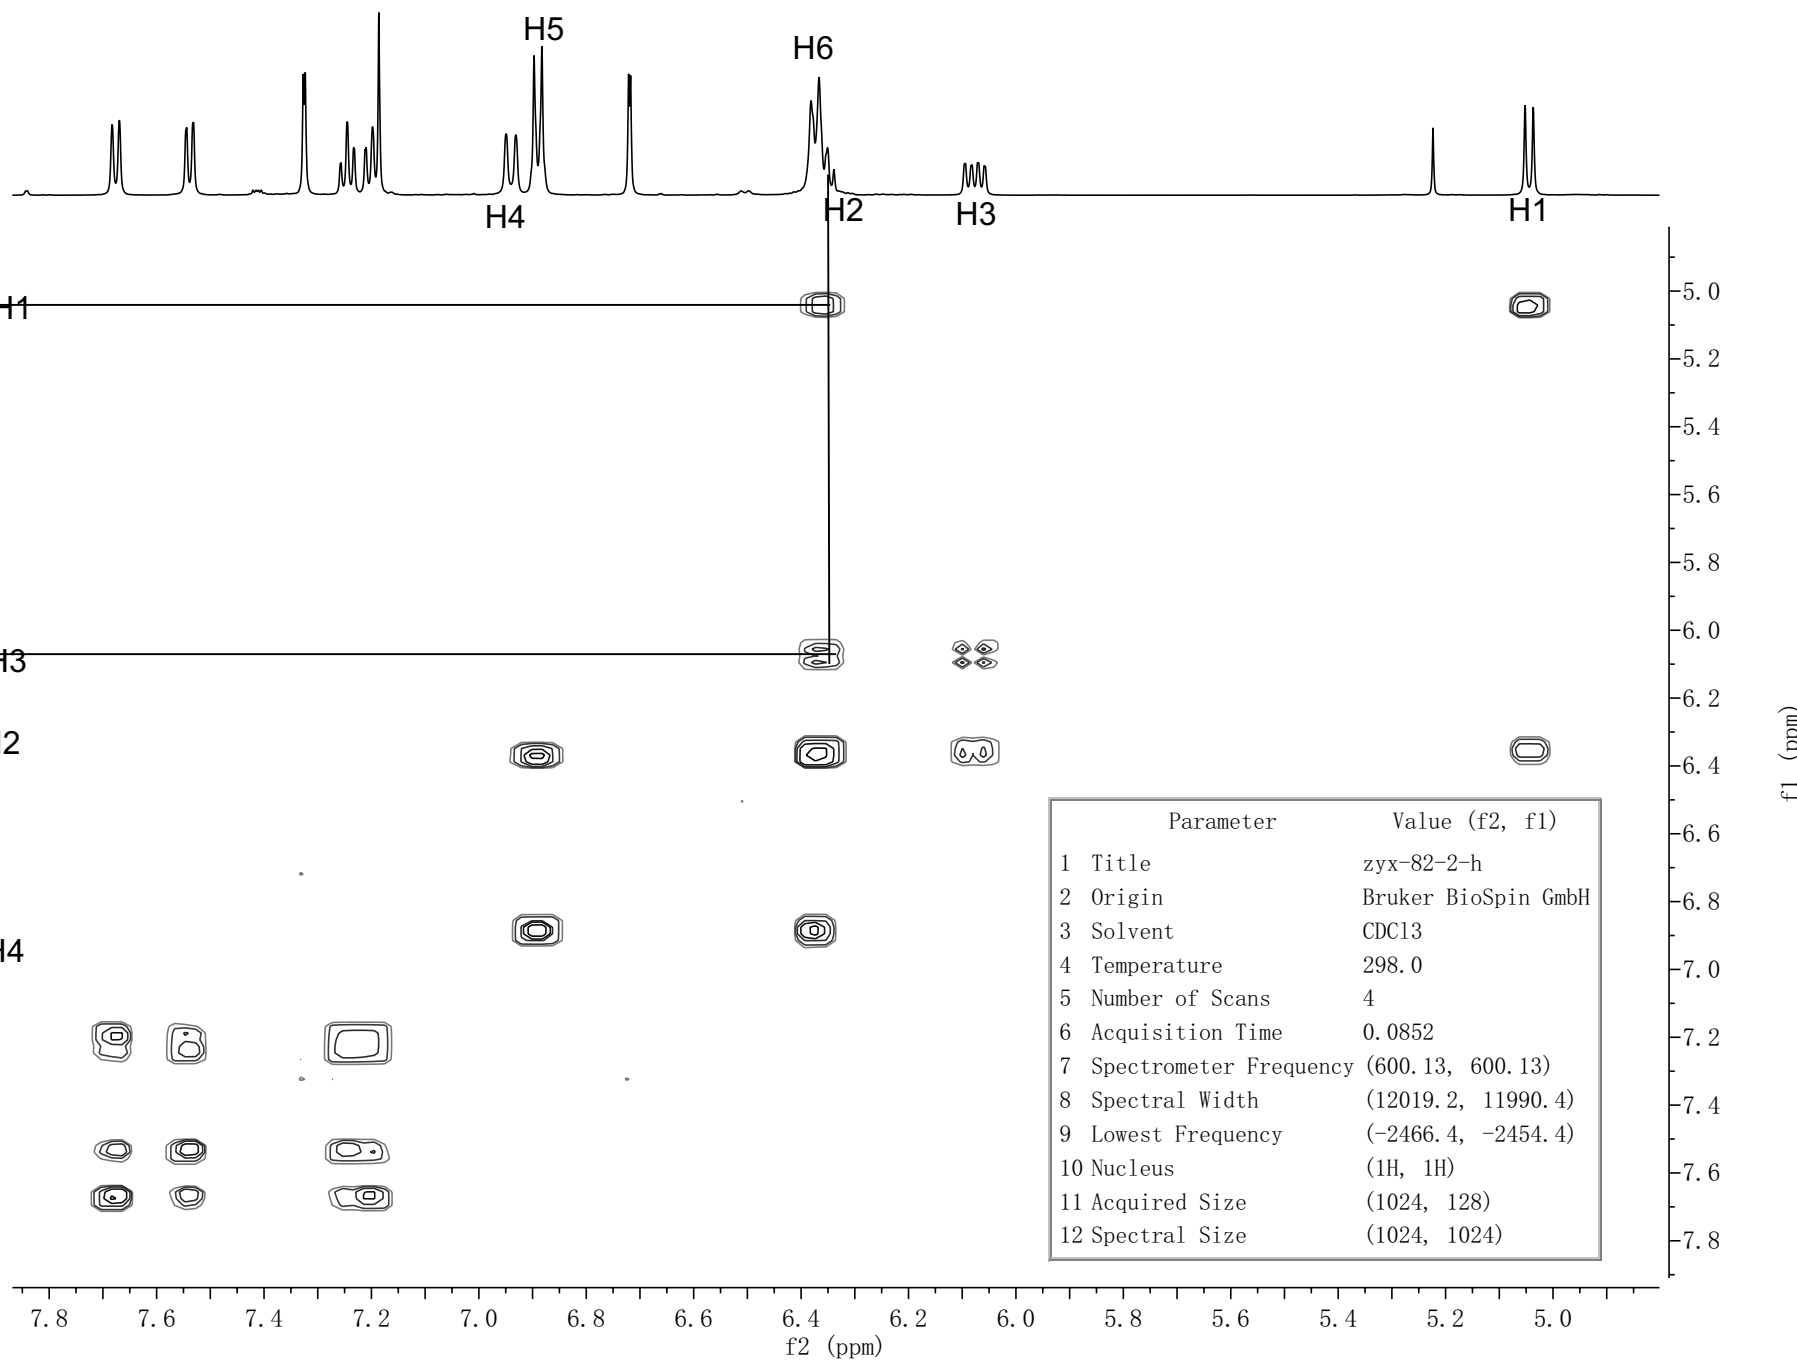

| Parameter                | Value (f2, f1)      |
|--------------------------|---------------------|
| 1 Title                  | zyx-82-2-h          |
| 2 Origin                 | Bruker BioSpin GmbH |
| 3 Solvent                | CDC13               |
| 4 Temperature            | 298.0               |
| 5 Number of Scans        | 4                   |
| 6 Acquisition Time       | 0.0852              |
| 7 Spectrometer Frequency | (600.13, 600.13)    |
| 8 Spectral Width         | (12019.2, 11990.4)  |
| 9 Lowest Frequency       | (-2466.4, -2454.4)  |
| 10 Nucleus               | (1H, 1H)            |
| 11 Acquired Size         | (1024, 128)         |
| 12 Spectral Size         | (1024, 1024)        |

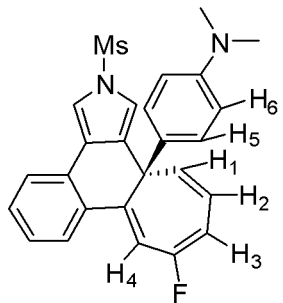

2i (HMBC)  
CDCl<sub>3</sub>, 600 MHz

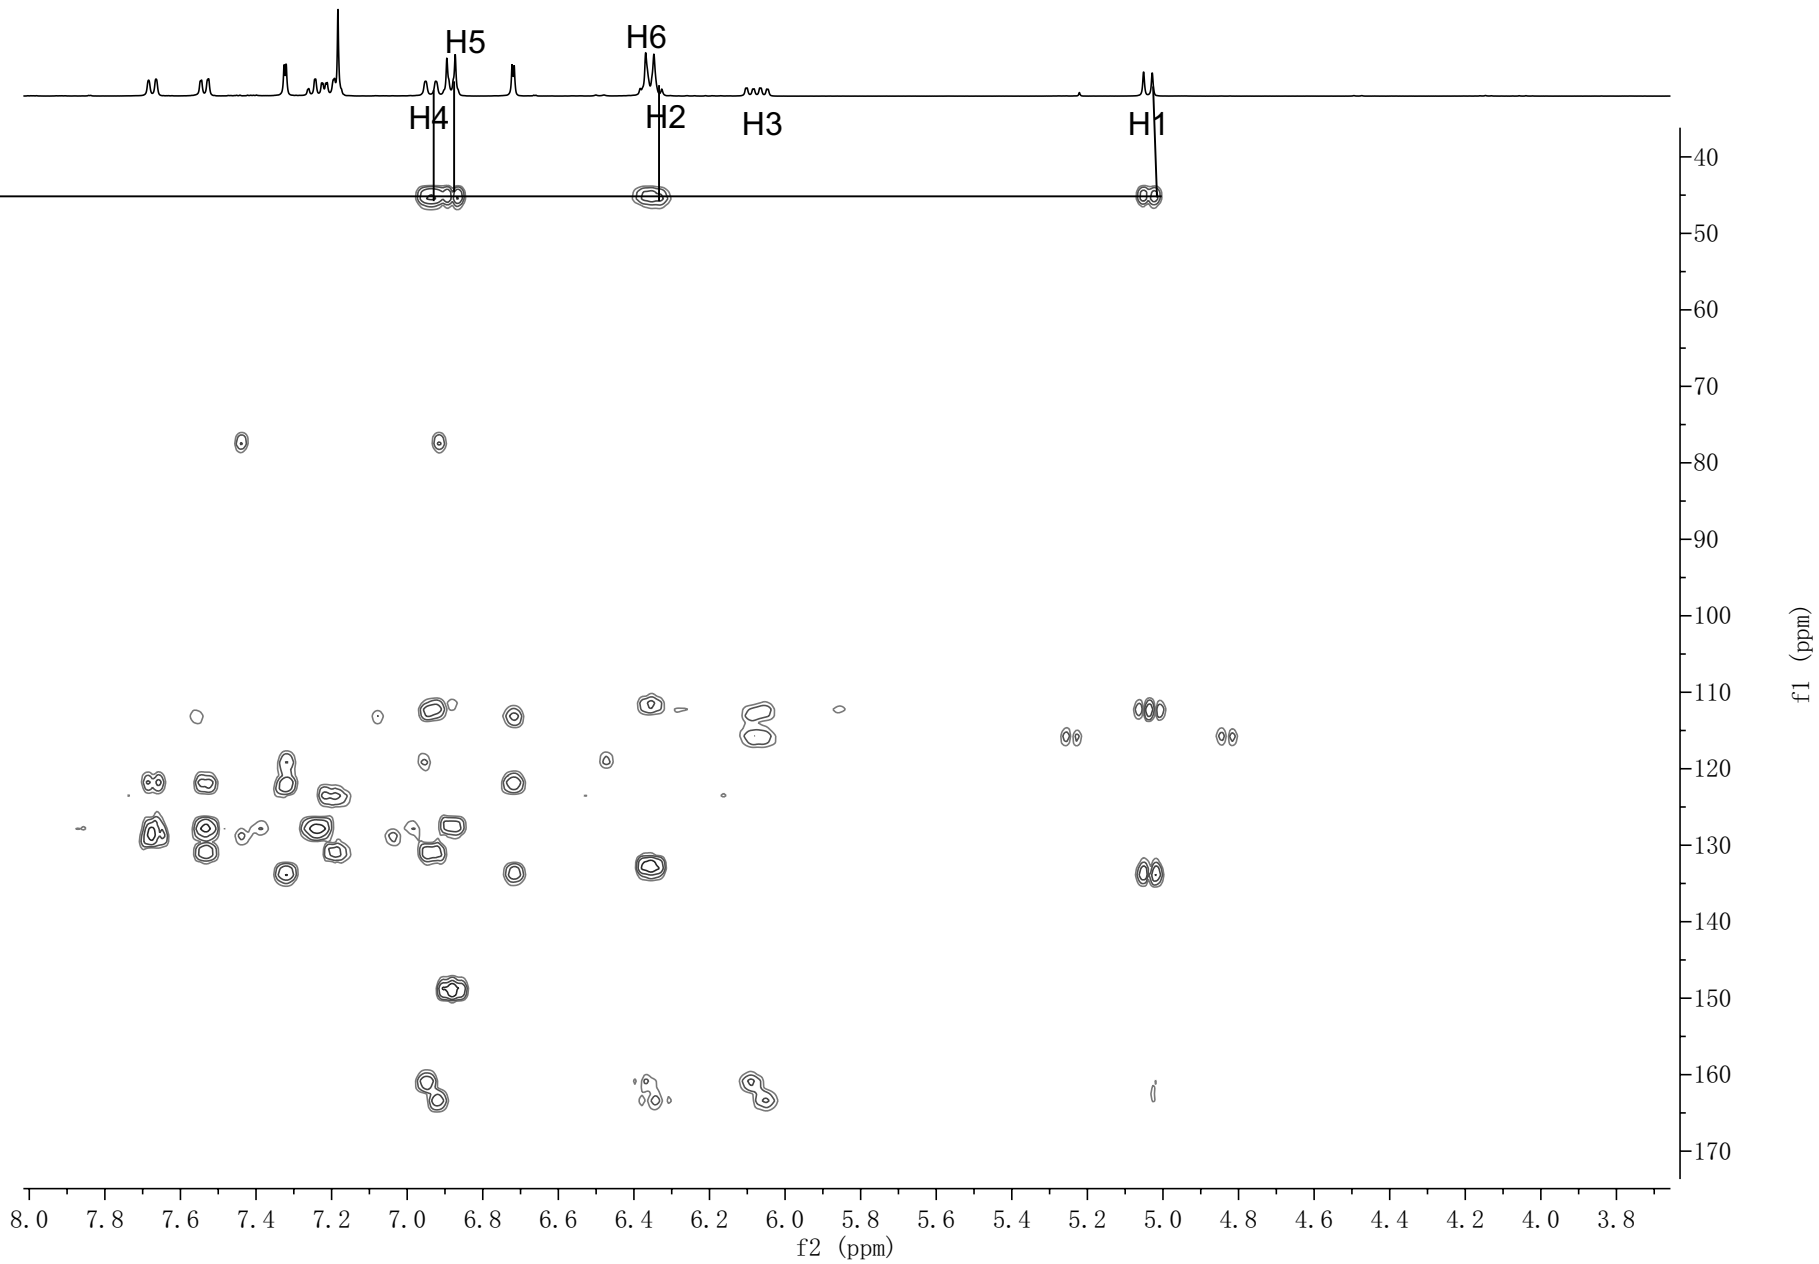

7.545  
7.534  
7.531  
7.390  
7.388  
7.376  
7.351  
7.347  
7.226  
7.217  
7.196  
6.981  
6.967  
6.624  
6.620  
6.492  
6.478  
6.231  
6.216  
5.944  
5.930  
5.916  
5.576  
5.562  
5.546

3.051  
3.017  
2.999  
2.838

0.000

| Parameter                | Value               |
|--------------------------|---------------------|
| 1 Title                  | ZYX-11-82           |
| 2 Origin                 | Bruker BioSpin GmbH |
| 3 Solvent                | CDC13               |
| 4 Temperature            | 298.0               |
| 5 Number of Scans        | 6                   |
| 6 Acquisition Time       | 2.7263              |
| 7 Acquisition Date       | 2023-11-22T13:00:23 |
| 8 Spectrometer Frequency | 600.13              |
| 9 Spectral Width         | 12019.2             |

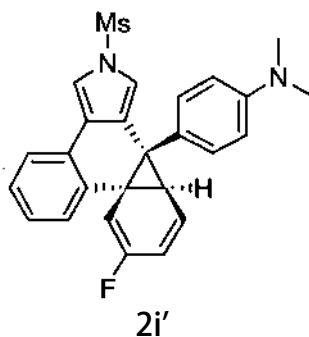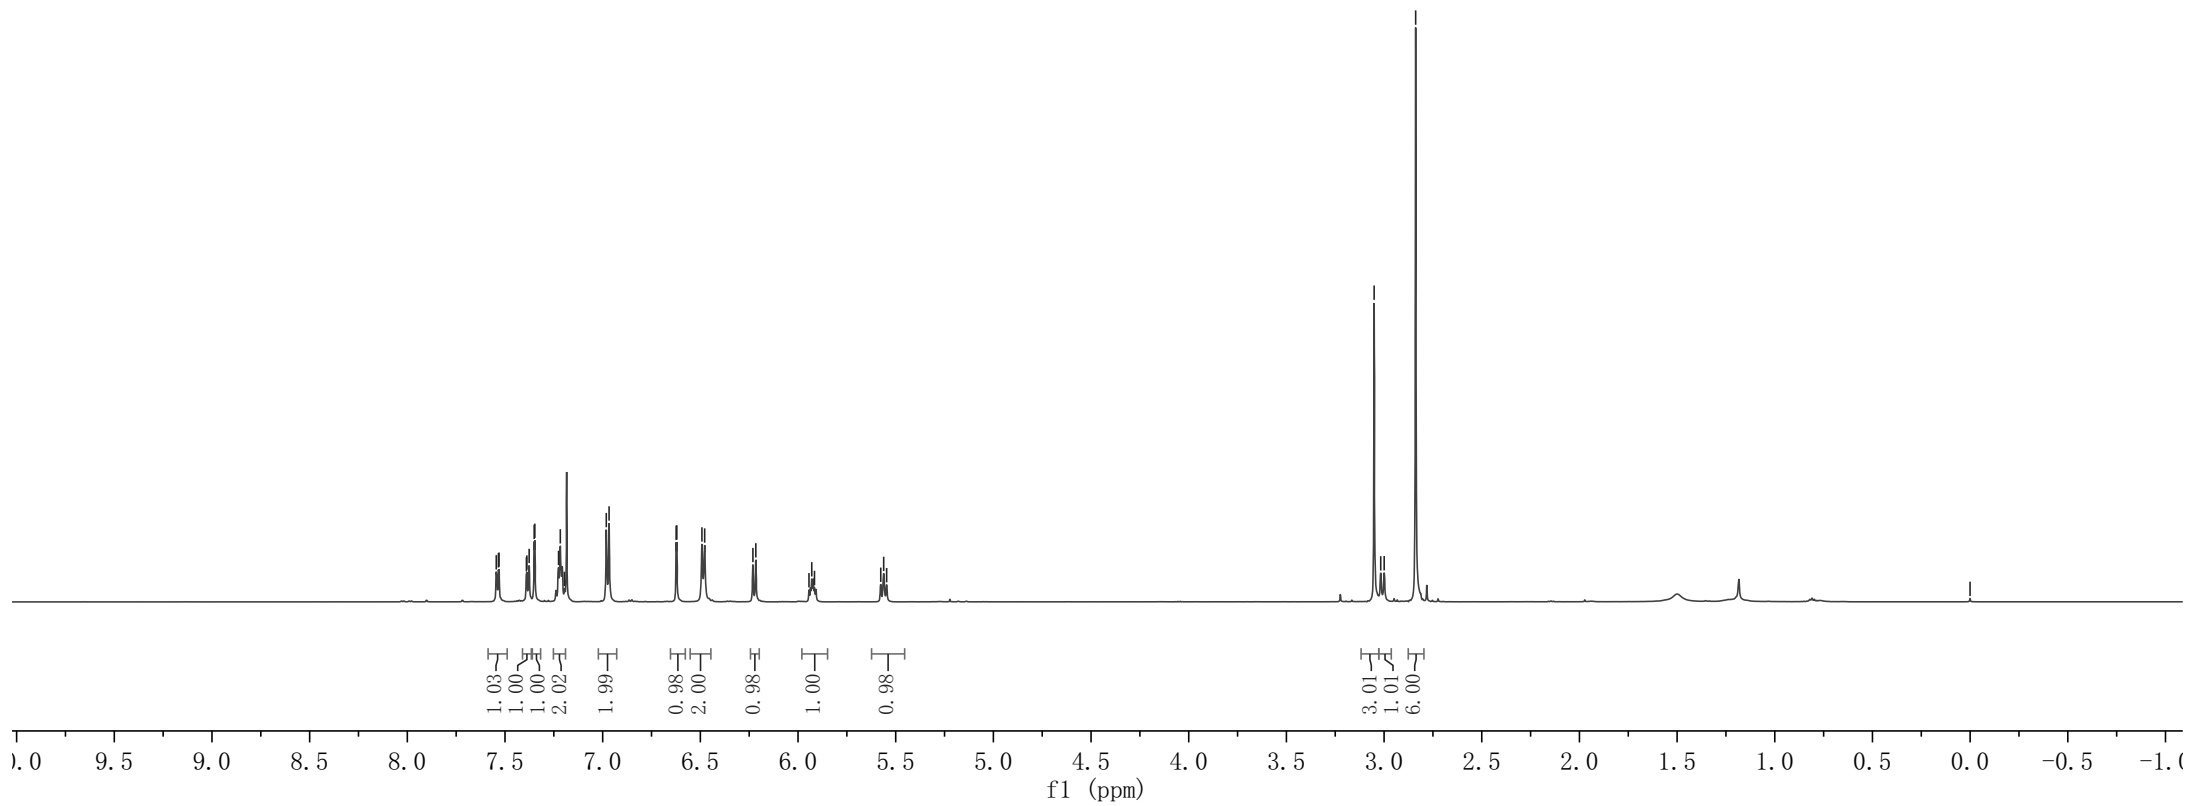

| Parameter                | Value               |
|--------------------------|---------------------|
| 1 Title                  | ZYX-11-82           |
| 2 Origin                 | Bruker BioSpin GmbH |
| 3 Solvent                | CDC13               |
| 4 Temperature            | 298.0               |
| 5 Number of Scans        | 143                 |
| 6 Acquisition Time       | 0.9044              |
| 7 Acquisition Date       | 2023-11-22T13:08:04 |
| 8 Spectrometer Frequency | 150.90              |
| 9 Spectral Width         | 36231.9             |

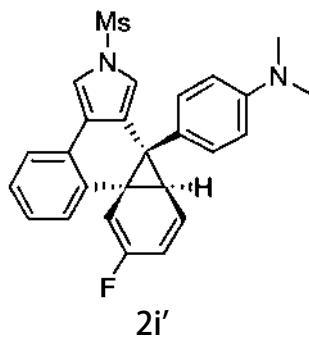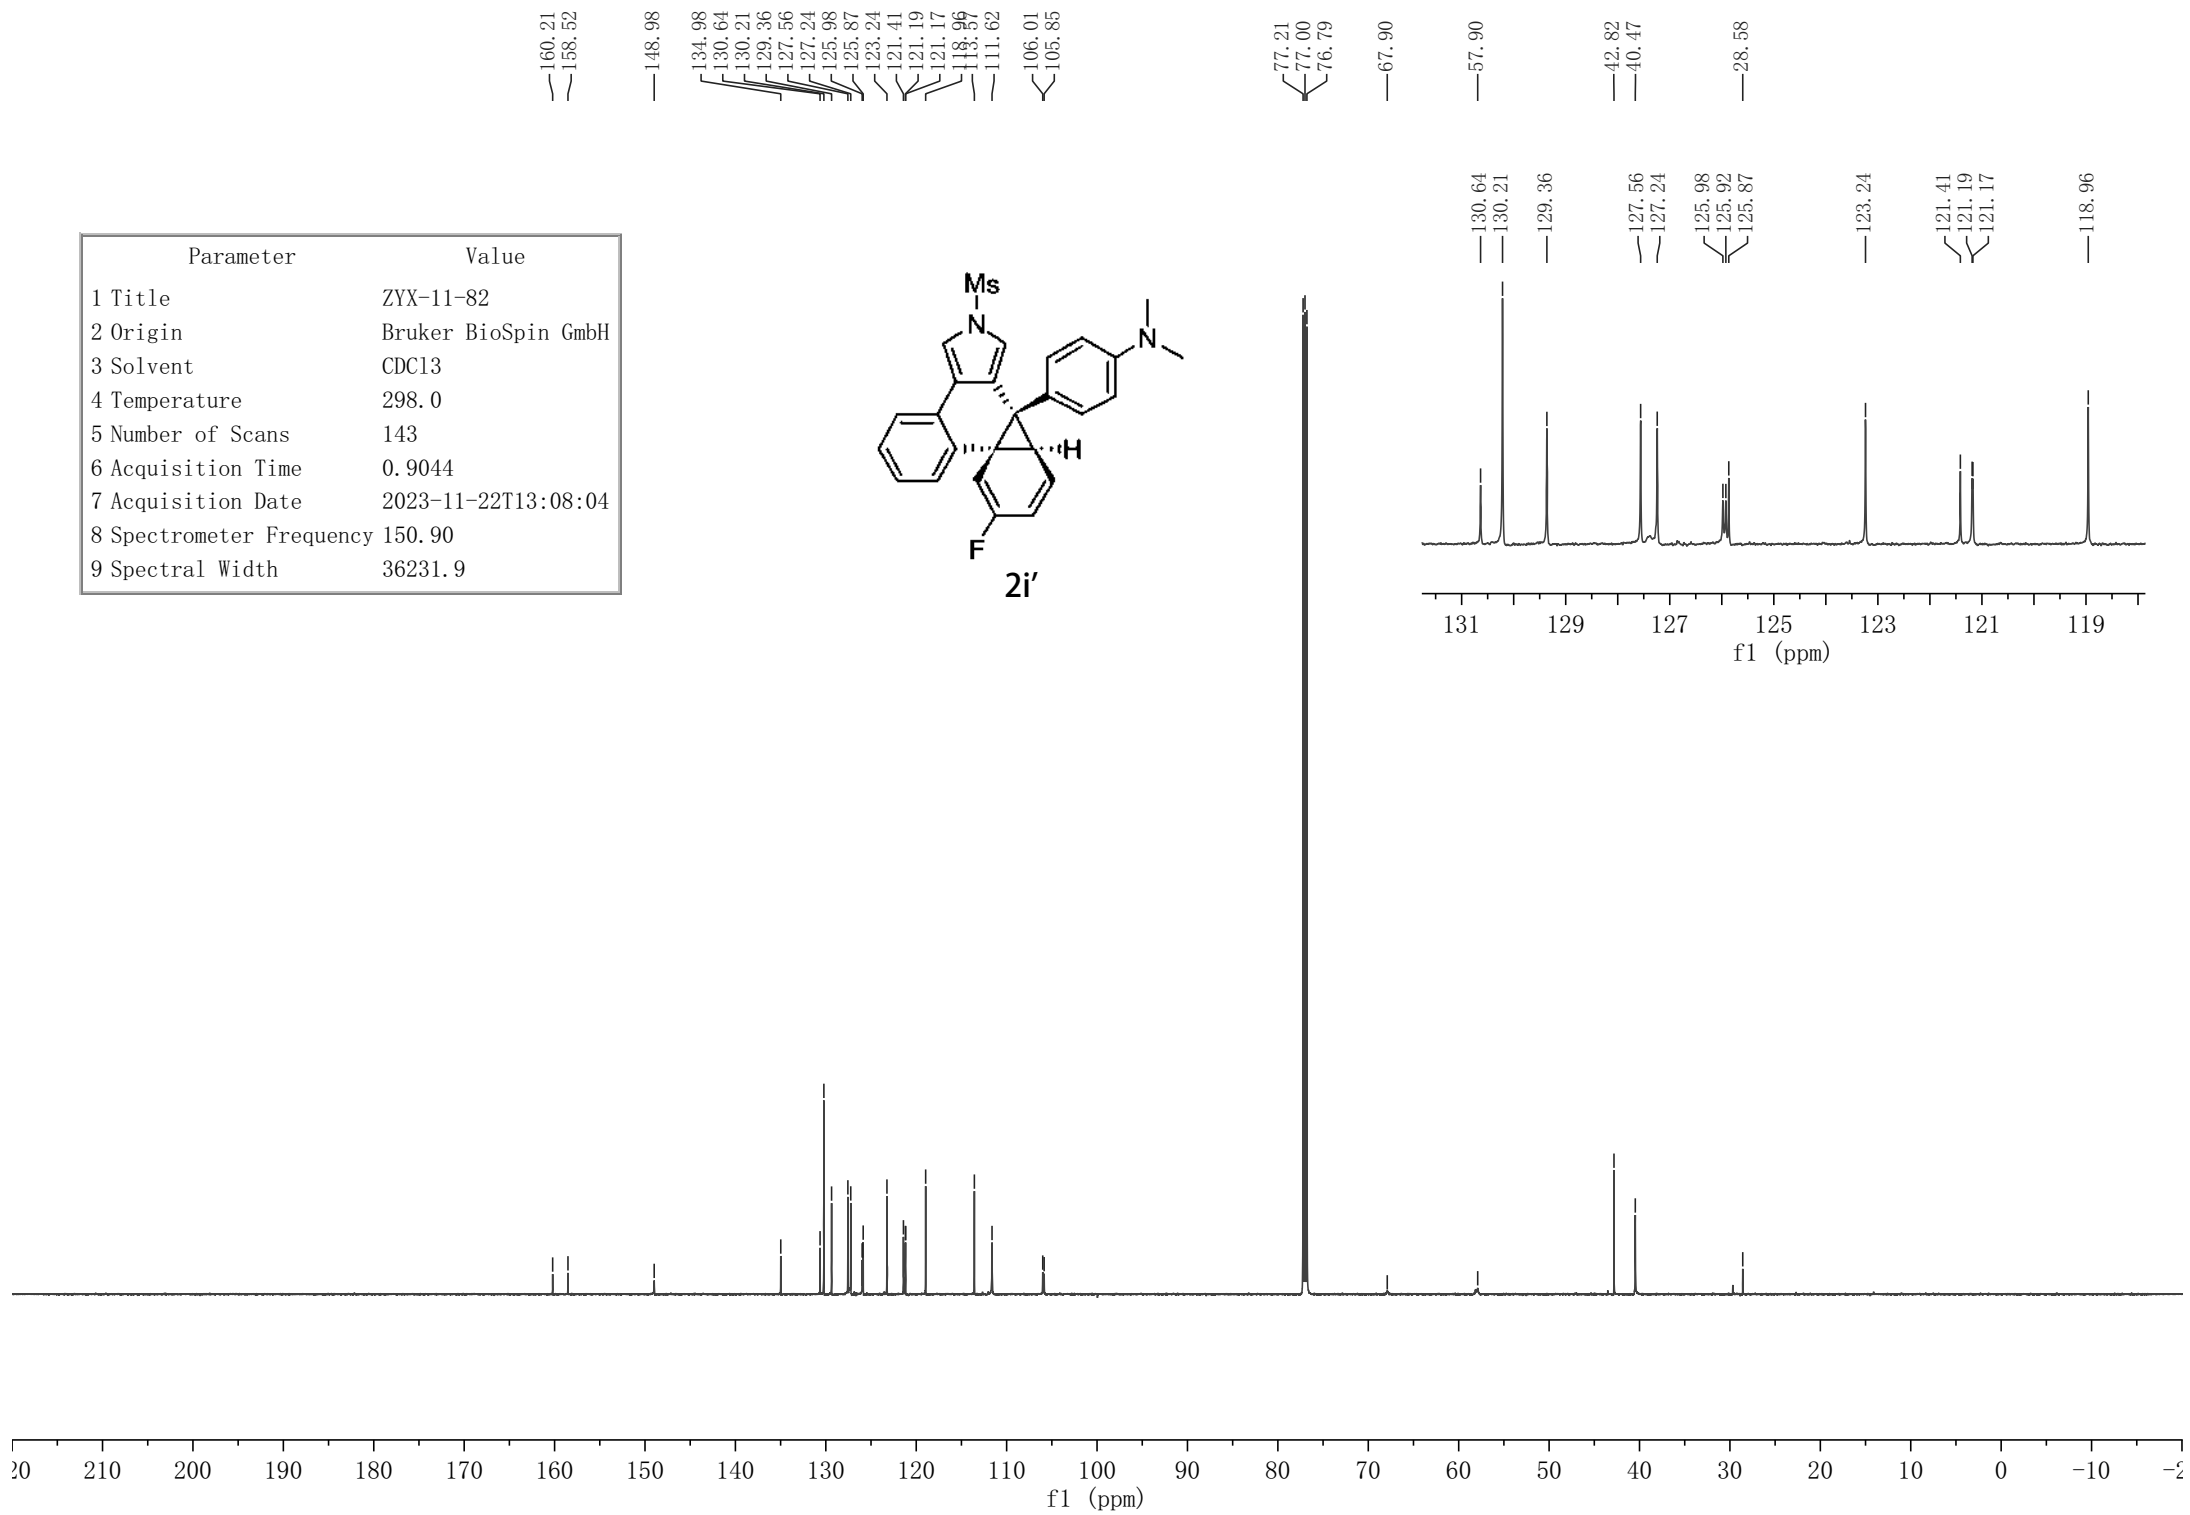

| Parameter                | Value               |
|--------------------------|---------------------|
| 1 Title                  | ZYX-11-82           |
| 2 Origin                 | Bruker BioSpin GmbH |
| 3 Solvent                | CDCl3               |
| 4 Temperature            | 298.0               |
| 5 Number of Scans        | 32                  |
| 6 Acquisition Time       | 0.9044              |
| 7 Acquisition Date       | 2023-11-22T13:11:44 |
| 8 Spectrometer Frequency | 150.90              |
| 9 Spectral Width         | 36231.9             |

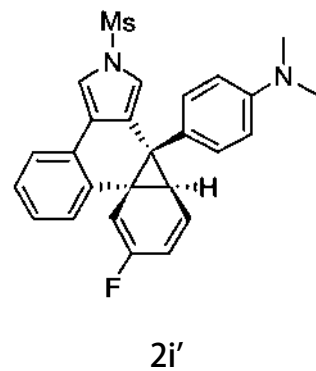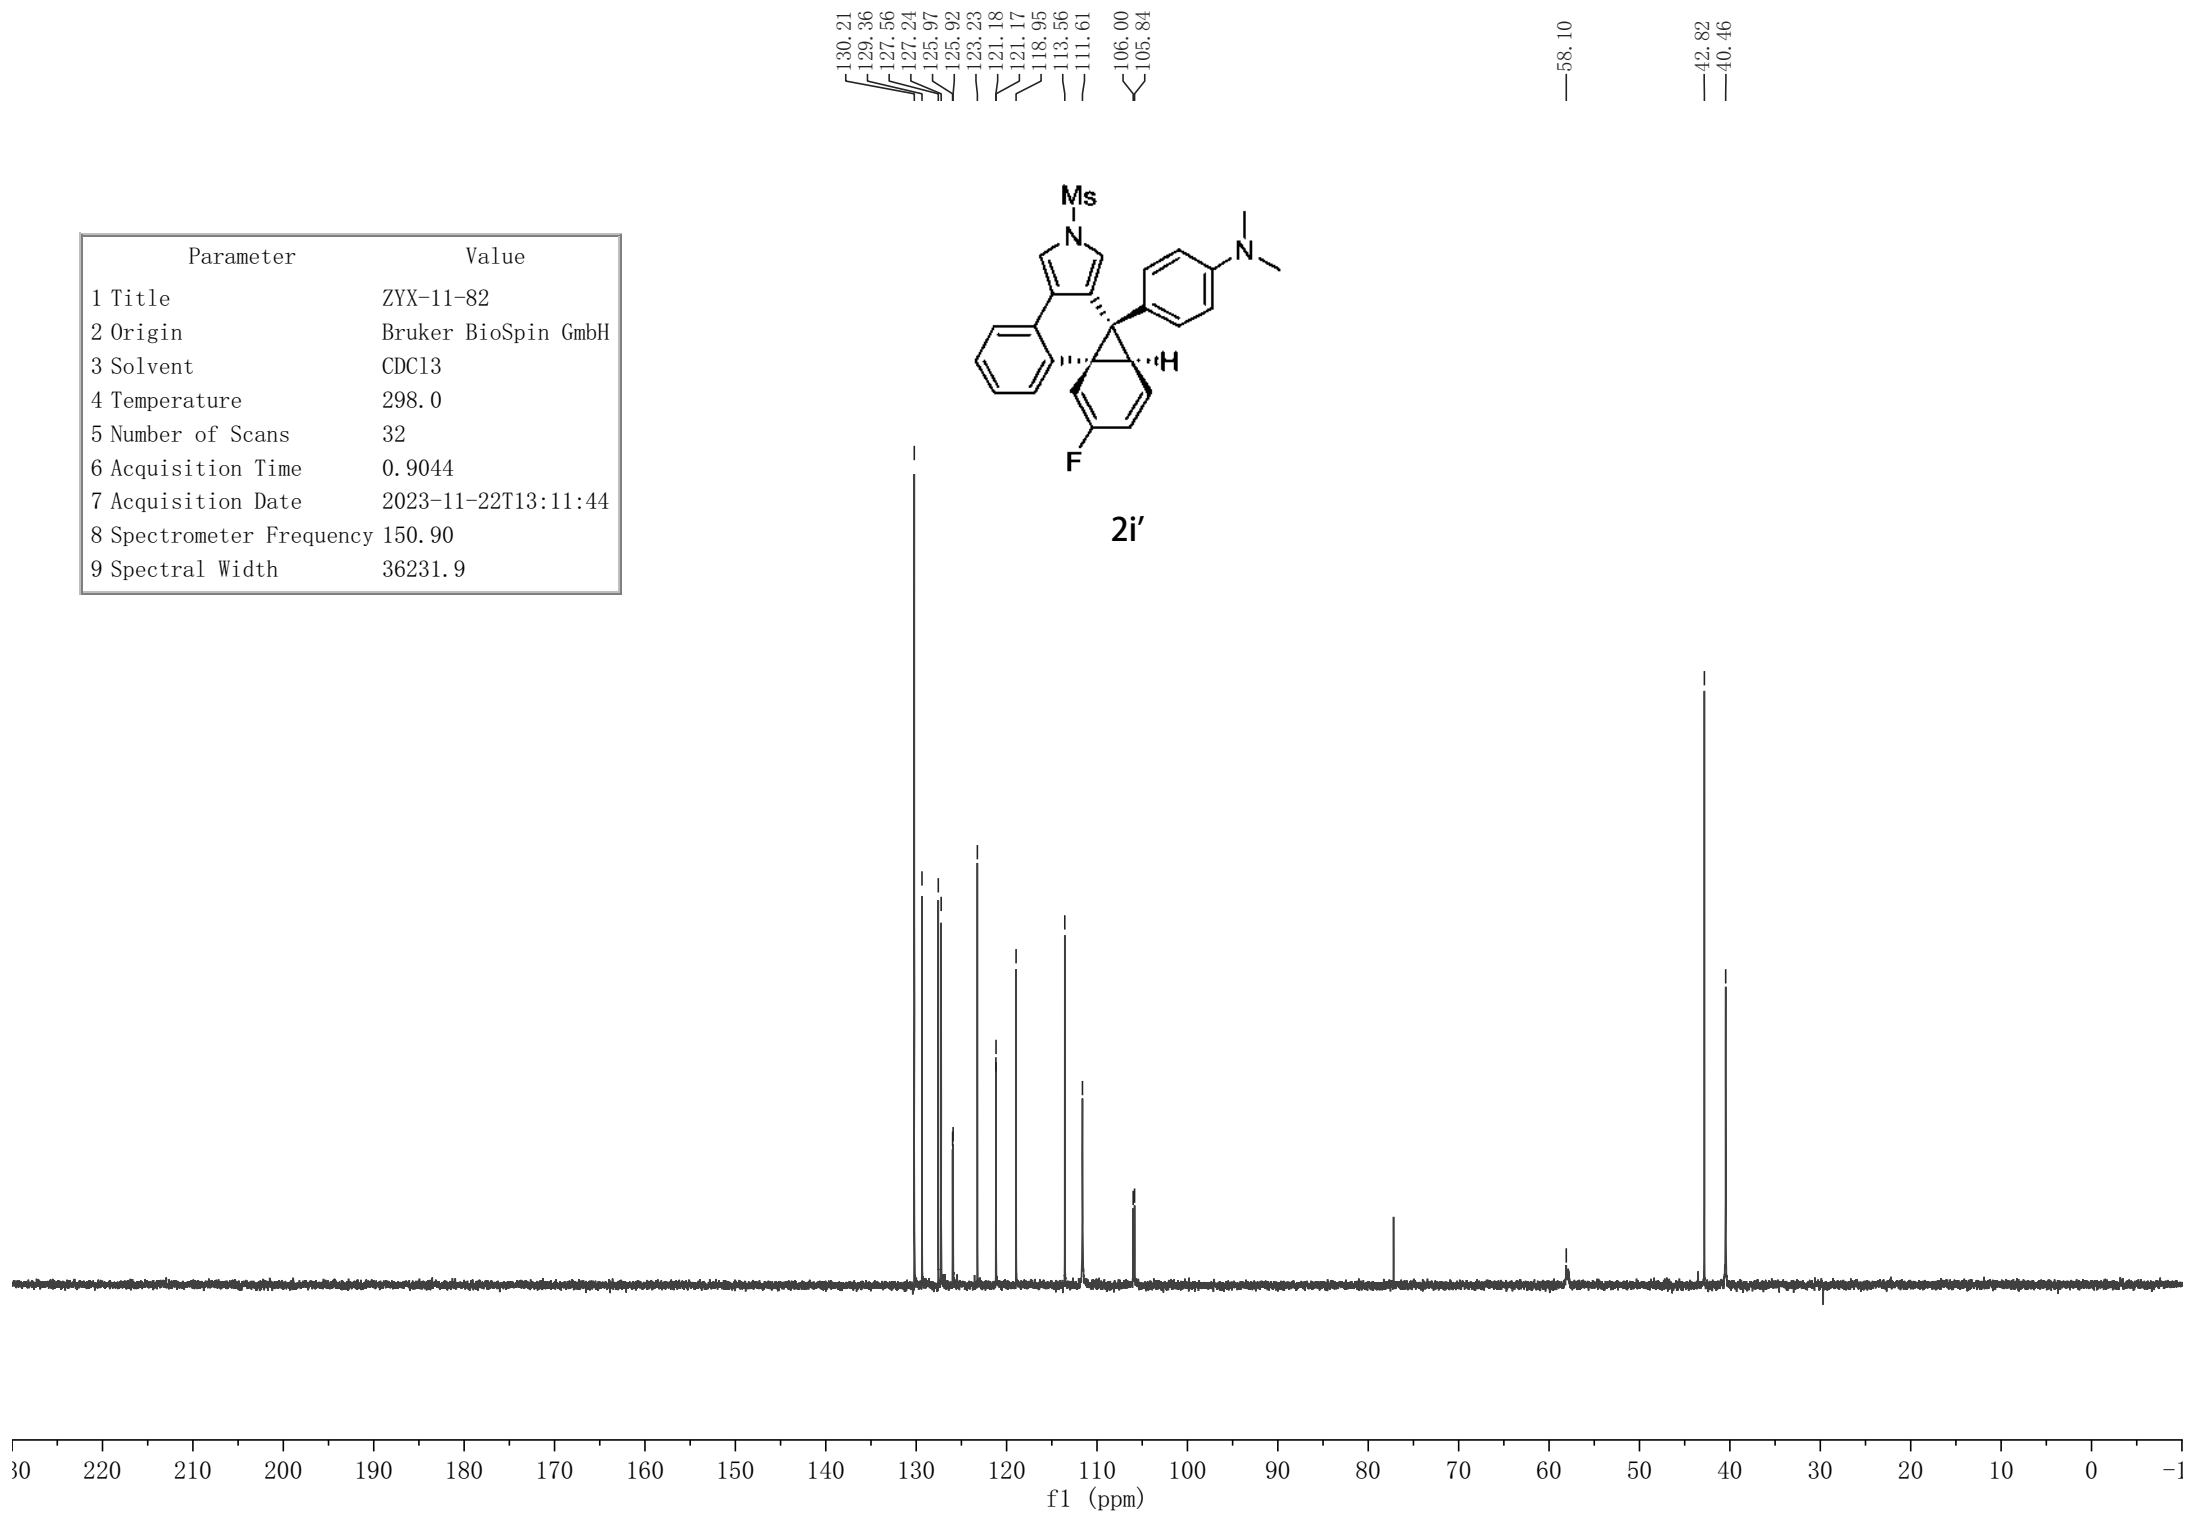

| Parameter                | Value               |
|--------------------------|---------------------|
| 1 Title                  | zyx-11-74-1-f       |
| 2 Origin                 |                     |
| 3 Solvent                | CDC13               |
| 4 Temperature            | 297.0               |
| 5 Number of Scans        | 16                  |
| 6 Acquisition Time       | 1.0000              |
| 7 Acquisition Date       | 2023-11-21T17:11:21 |
| 8 Spectrometer Frequency | 376.28              |
| 9 Spectral Width         | 96153.0             |

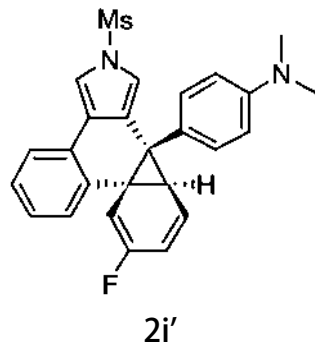

-107.37

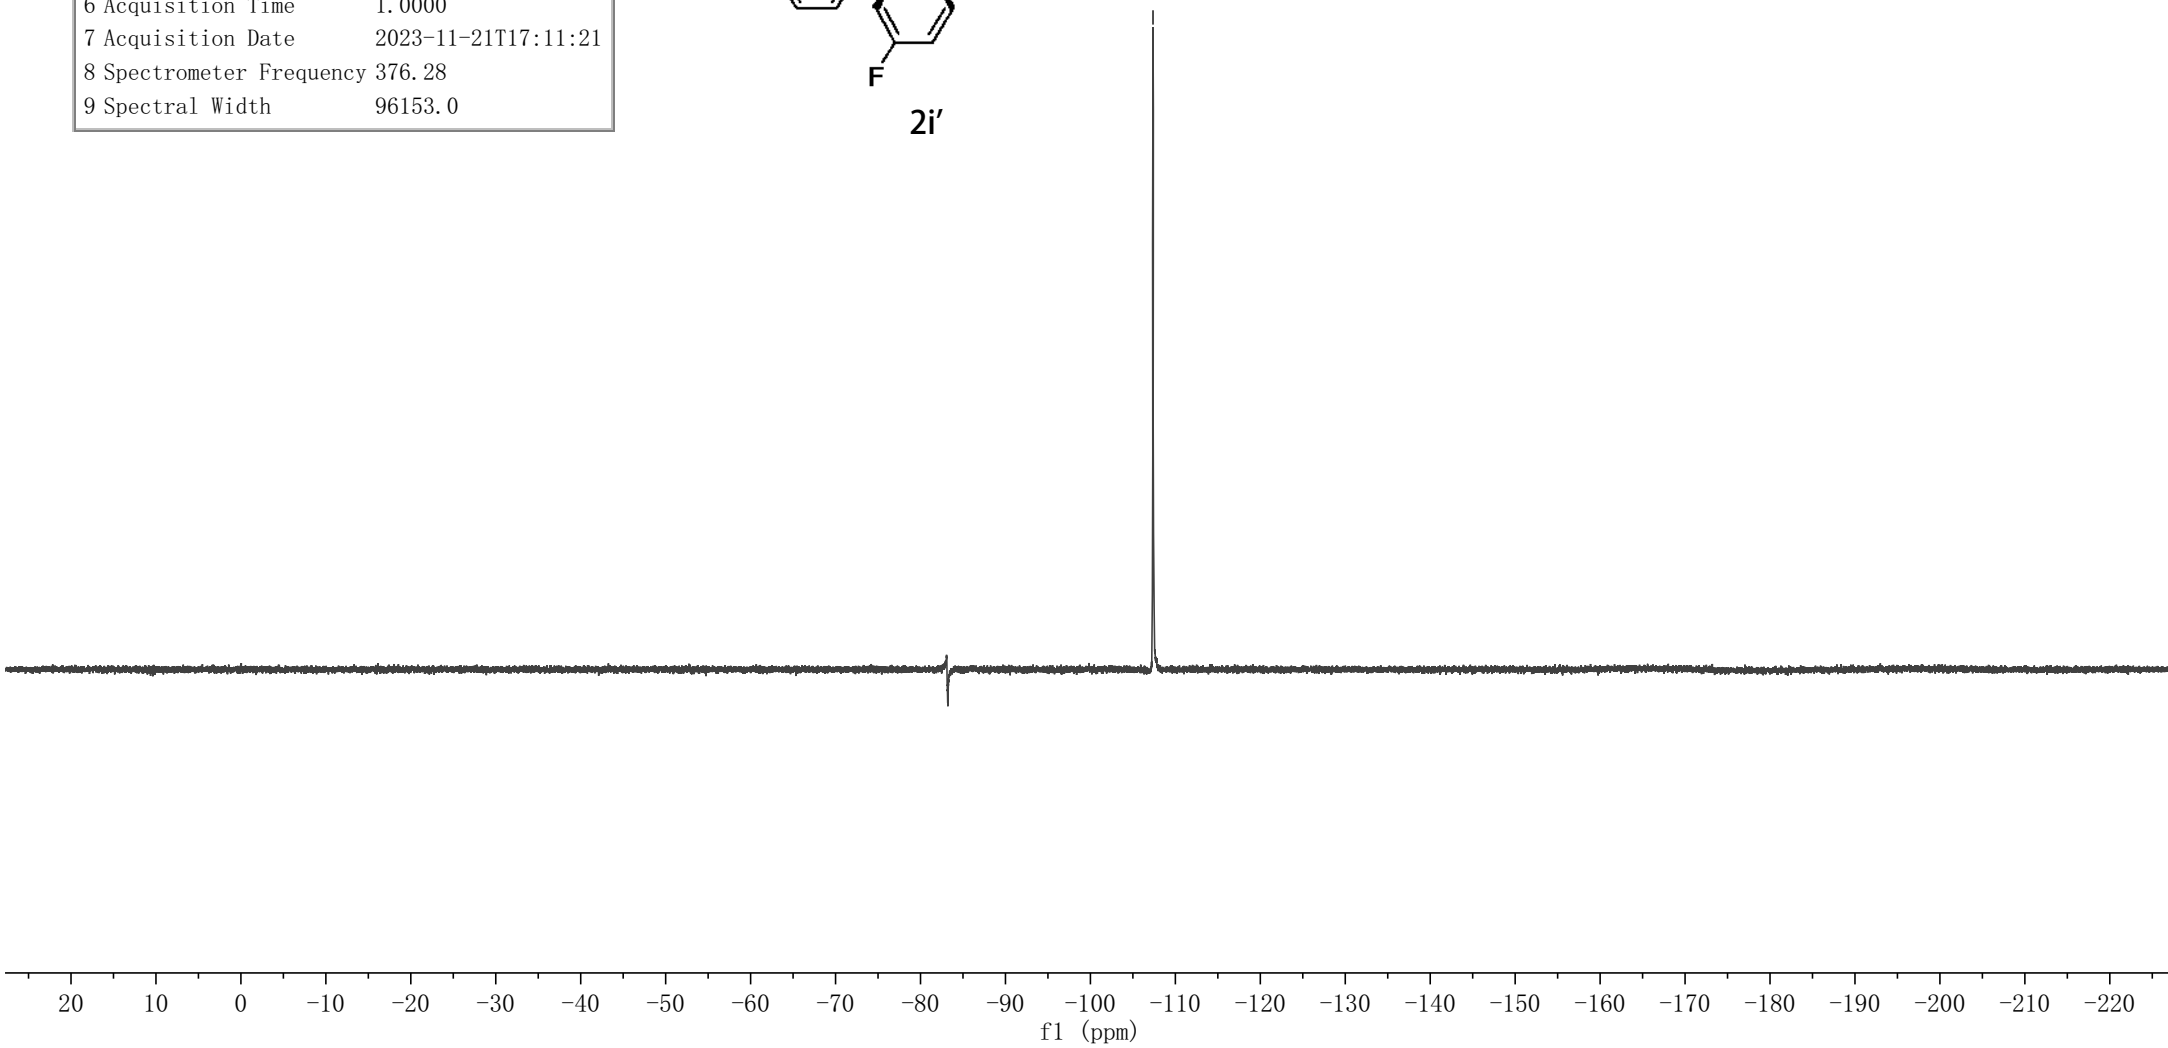



| Parameter                | Value               |
|--------------------------|---------------------|
| 1 Title                  | ZYX-4-219-H         |
| 2 Origin                 | Bruker BioSpin GmbH |
| 3 Solvent                | CDC13               |
| 4 Temperature            | 295.8               |
| 5 Number of Scans        | 10                  |
| 6 Acquisition Time       | 3.9846              |
| 7 Acquisition Date       | 2022-04-15T10:43:13 |
| 8 Spectrometer Frequency | 399.93              |
| 9 Spectral Width         | 8223.7              |

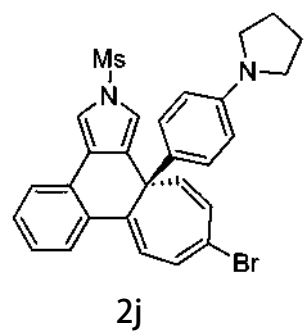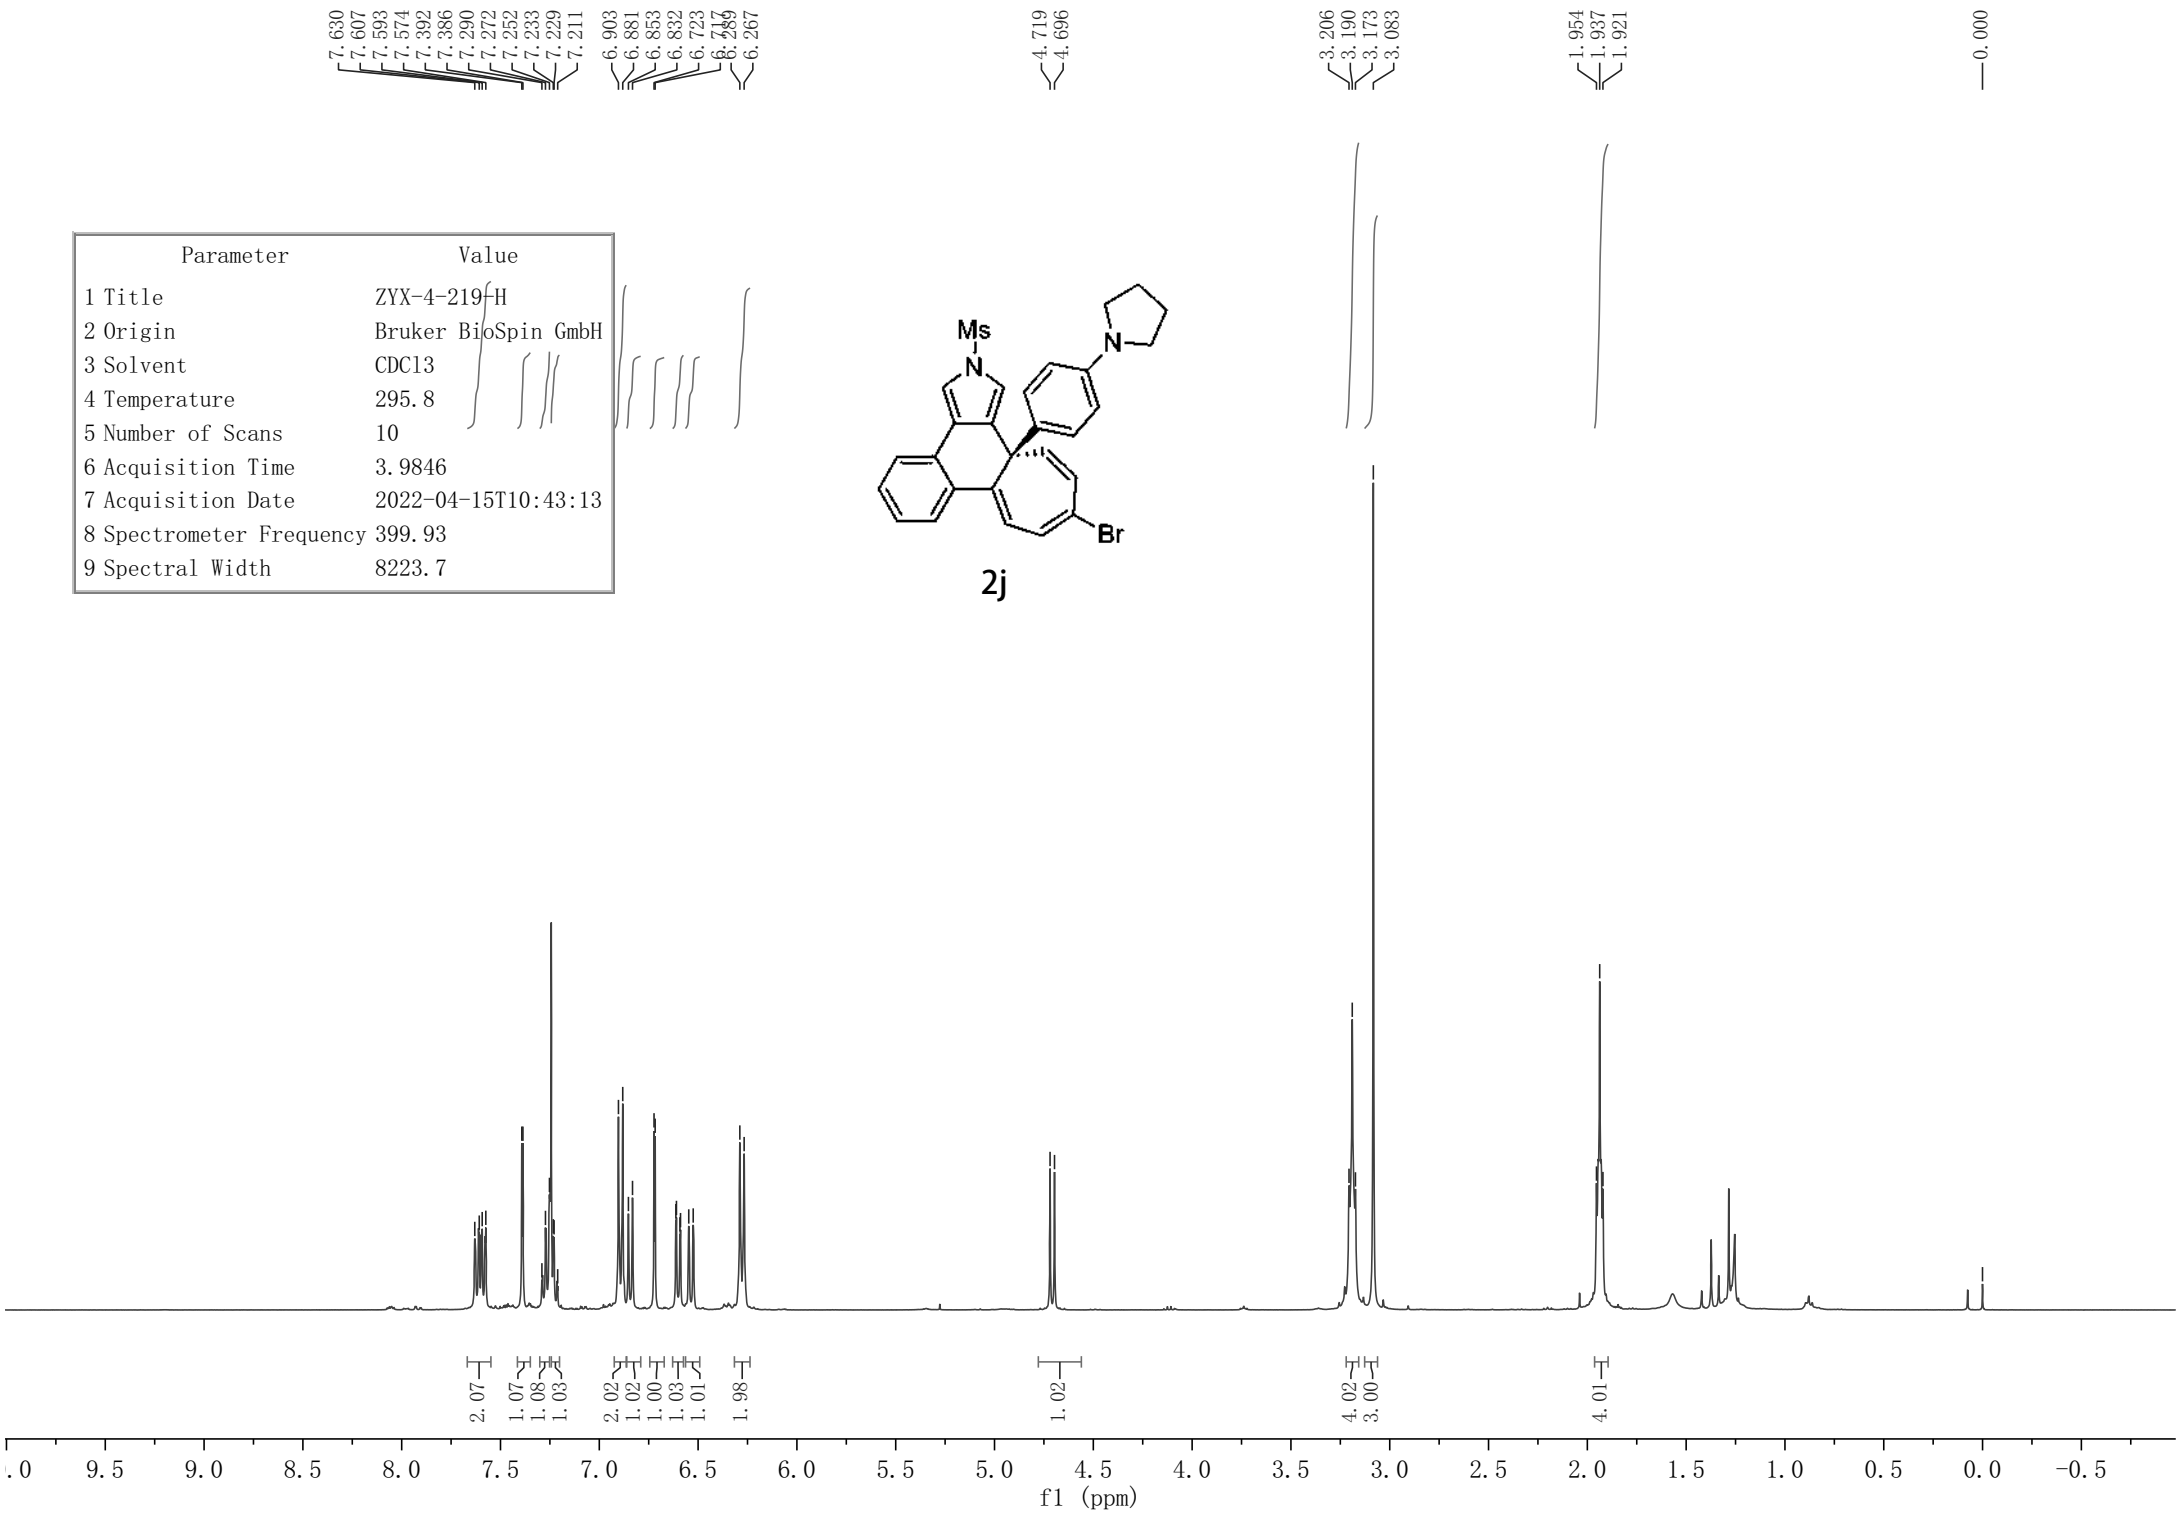

| Parameter                | Value               |
|--------------------------|---------------------|
| 1 Title                  | ZYX-4-219-H         |
| 2 Origin                 | Bruker BioSpin GmbH |
| 3 Solvent                | CDC13               |
| 4 Temperature            | 295.8               |
| 5 Number of Scans        | 10                  |
| 6 Acquisition Time       | 3.9846              |
| 7 Acquisition Date       | 2022-04-15T10:43:13 |
| 8 Spectrometer Frequency | 399.93              |
| 9 Spectral Width         | 8223.7              |

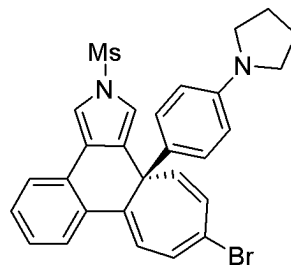

2j

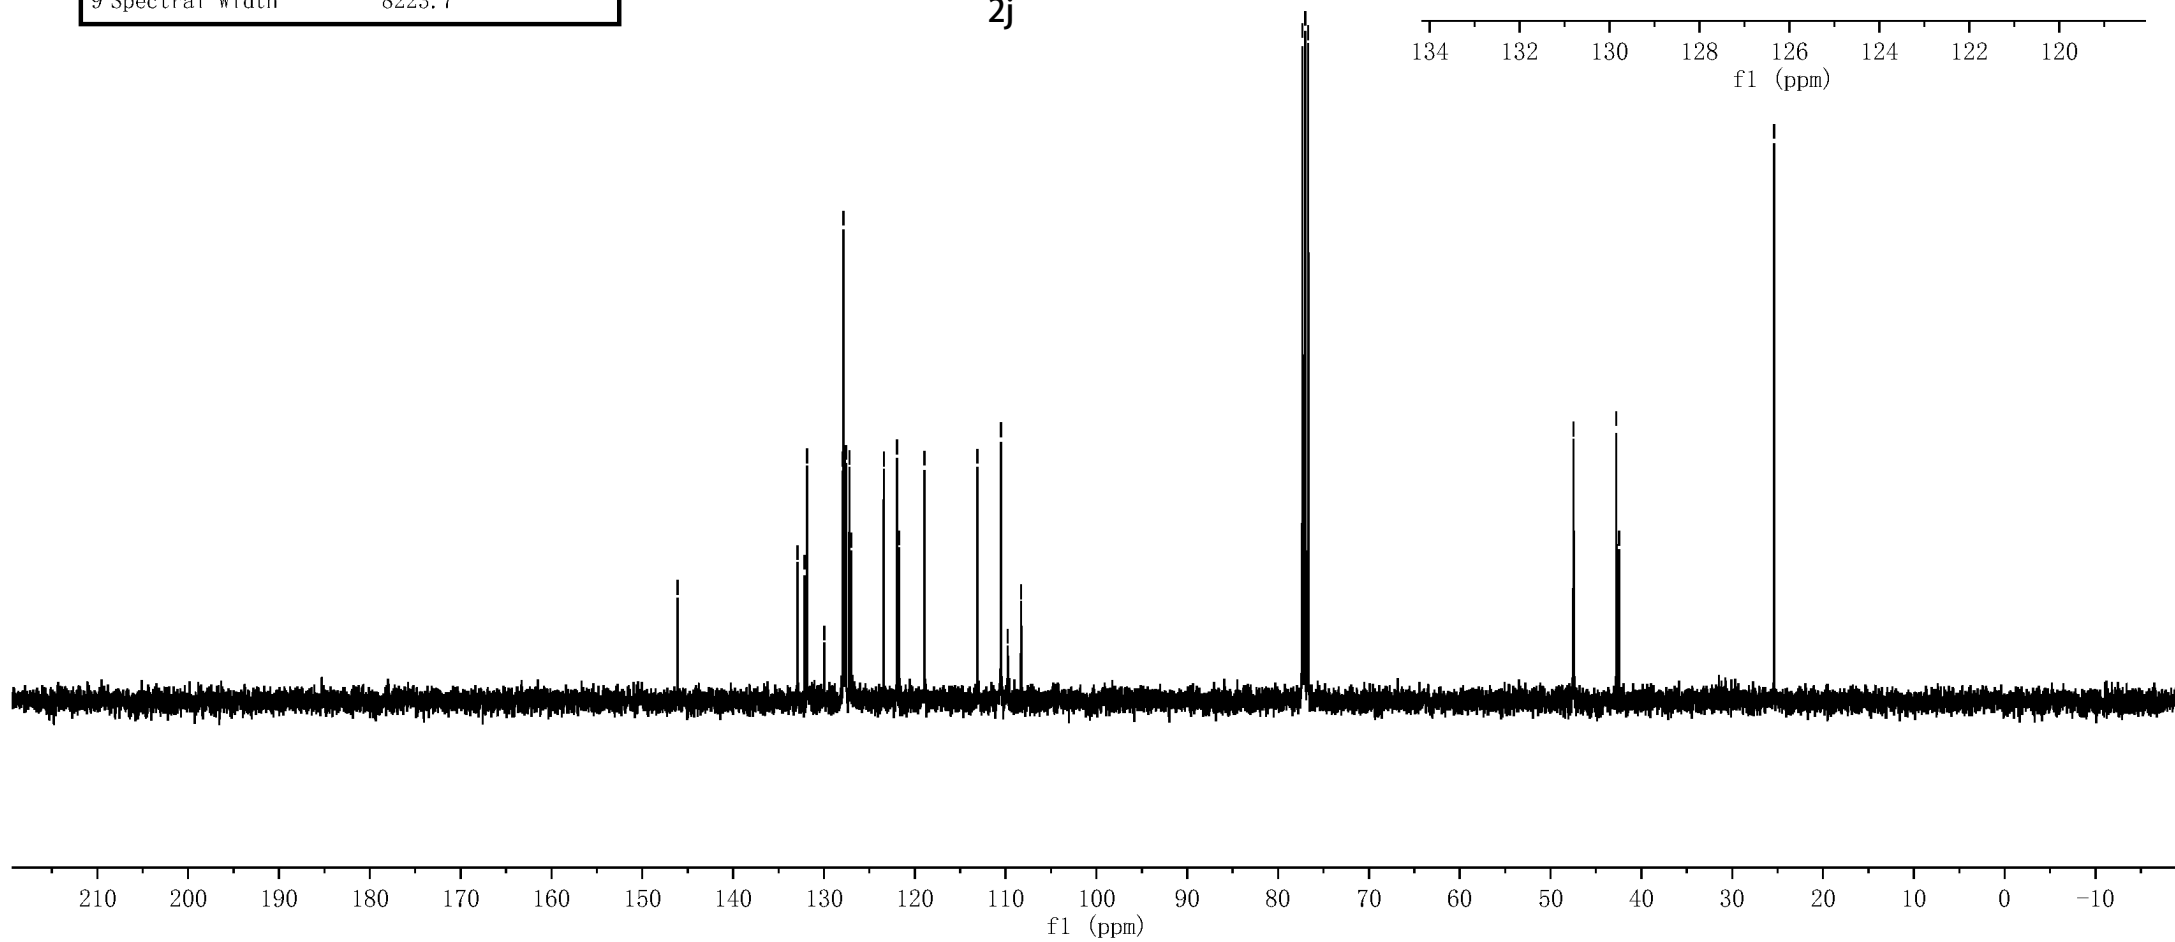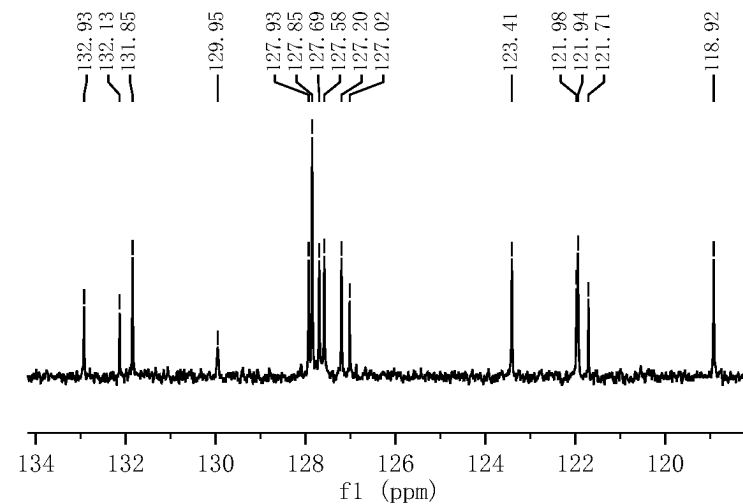

| Parameter                | Value               |
|--------------------------|---------------------|
| 1 Title                  | zyx-4-224--h        |
| 2 Origin                 | Bruker BioSpin GmbH |
| 3 Solvent                | CDCl3               |
| 4 Temperature            | 295.6               |
| 5 Number of Scans        | 16                  |
| 6 Acquisition Time       | 3.9846              |
| 7 Acquisition Date       | 2022-04-23T11:03:41 |
| 8 Spectrometer Frequency | 399.93              |
| 9 Spectral Width         | 8223.7              |

7.606  
7.587  
7.568  
7.552  
7.385  
7.379  
7.295  
7.278  
7.254  
7.205  
7.185  
7.164  
6.844  
6.827  
6.811  
6.757  
6.752  
6.622  
6.619  
6.601  
6.598  
6.497  
6.471  
6.449

4.748  
4.725  
4.564  
4.522  
4.494  
4.452

3.085

0.000

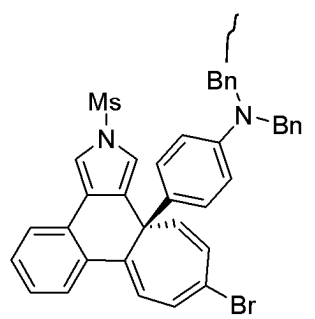

2k

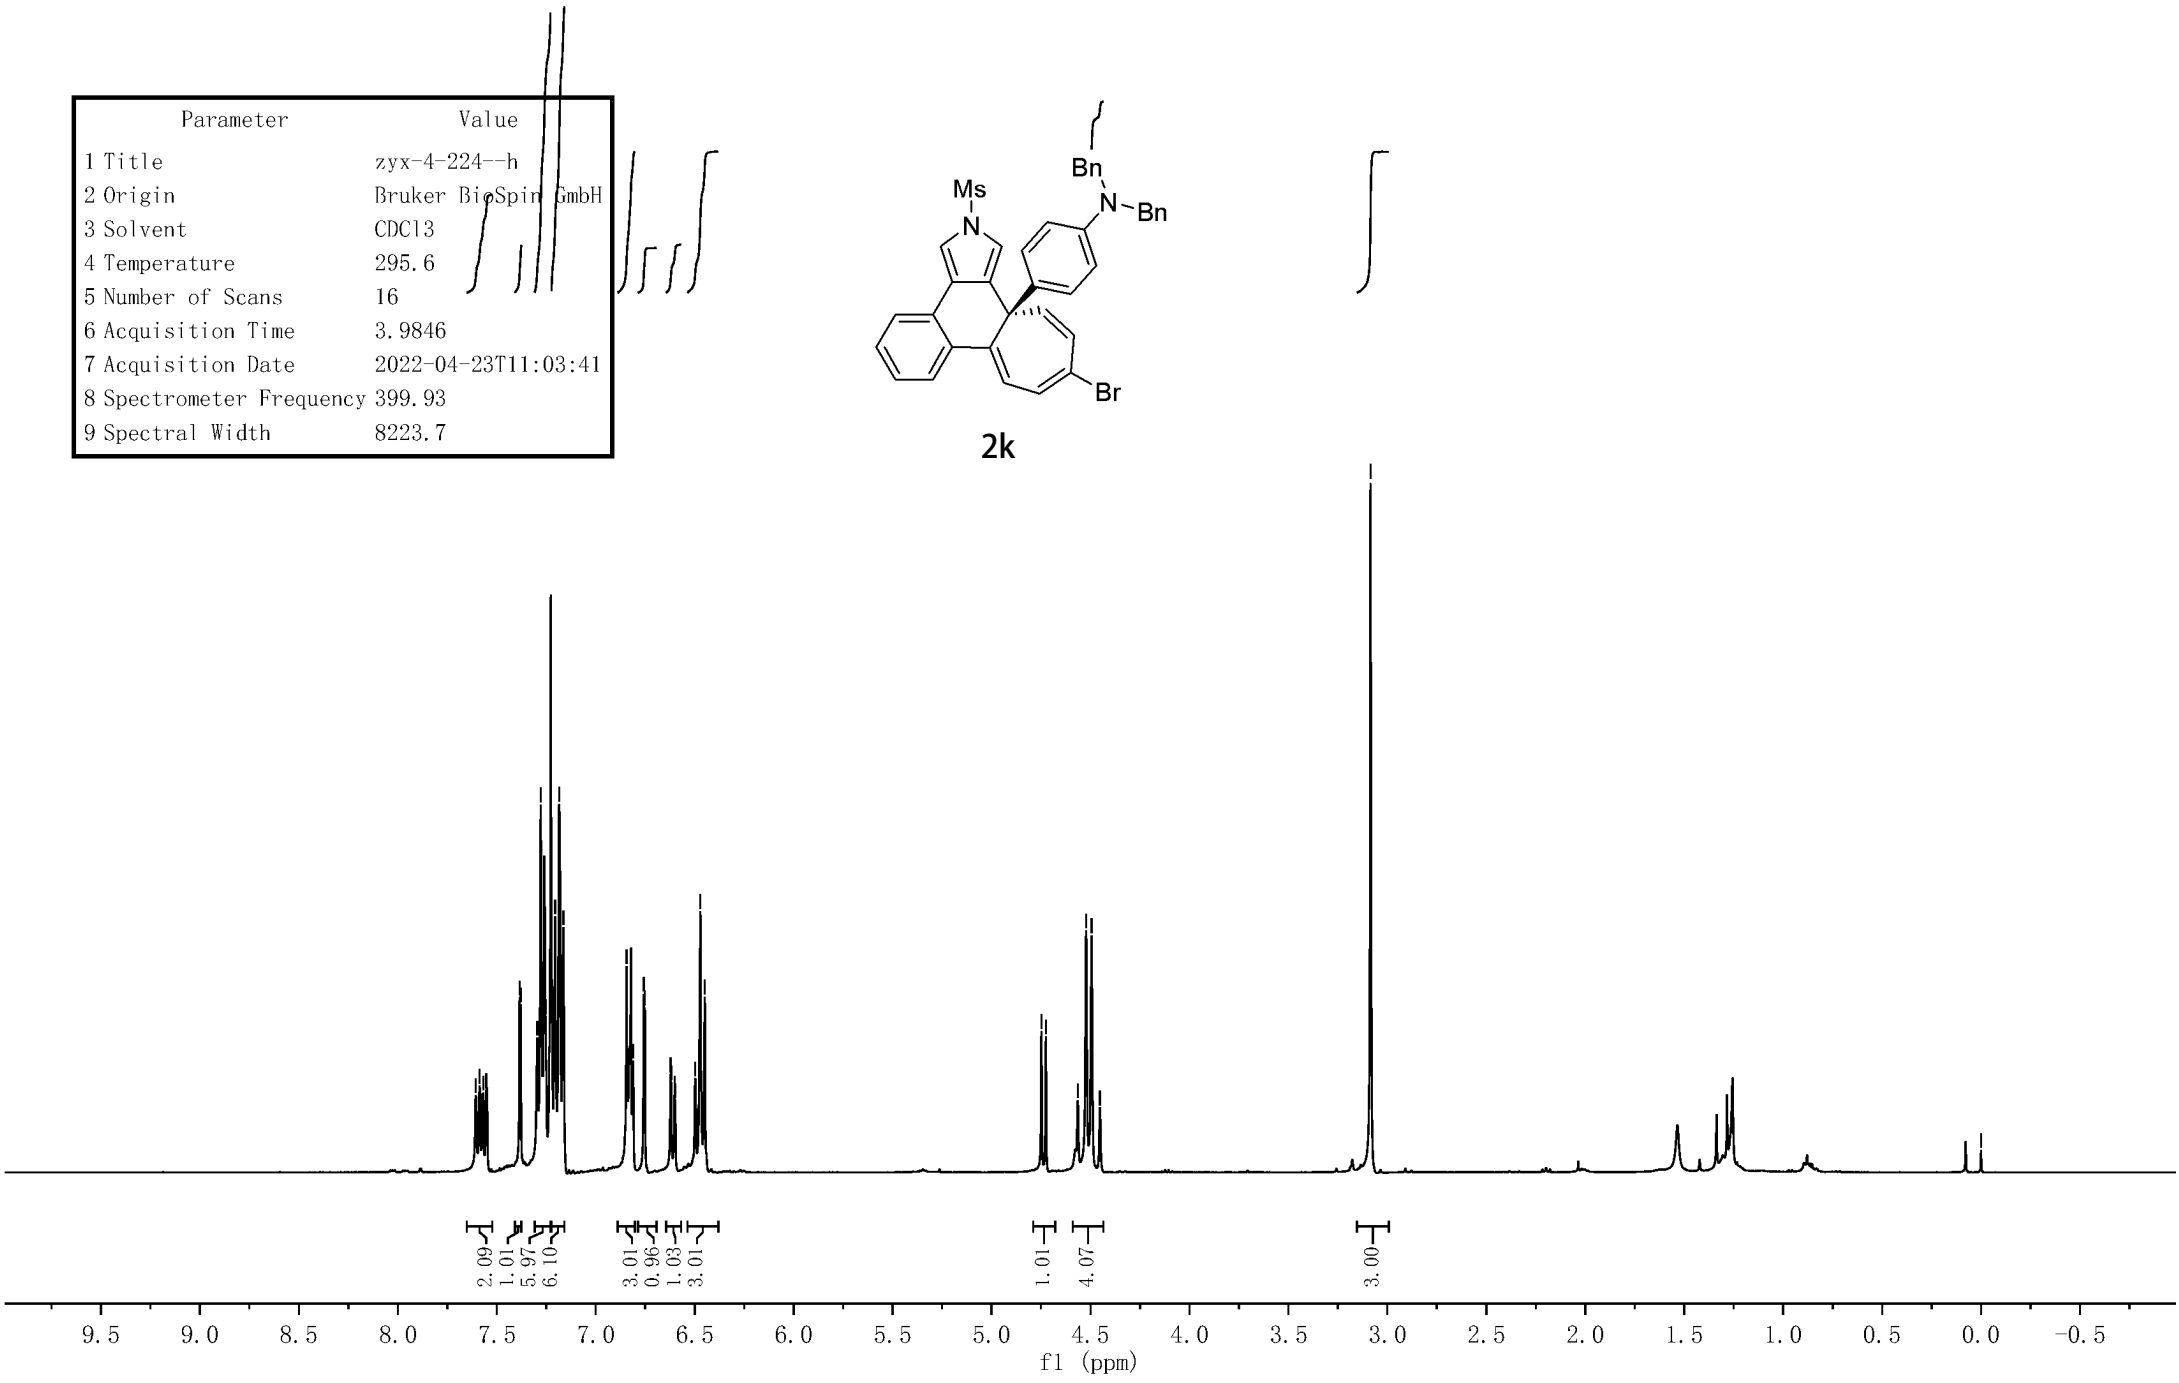

| Parameter                | Value               |
|--------------------------|---------------------|
| 1 Title                  | zyx-4-224-C         |
| 2 Origin                 | Bruker BioSpin GmbH |
| 3 Solvent                | CDCl3               |
| 4 Temperature            | 296.0               |
| 5 Number of Scans        | 93                  |
| 6 Acquisition Time       | 1.3631              |
| 7 Acquisition Date       | 2022-04-22T21:45:21 |
| 8 Spectrometer Frequency | 100.56              |
| 9 Spectral Width         | 24038.5             |

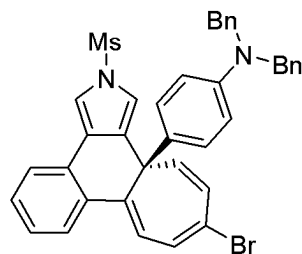

2k

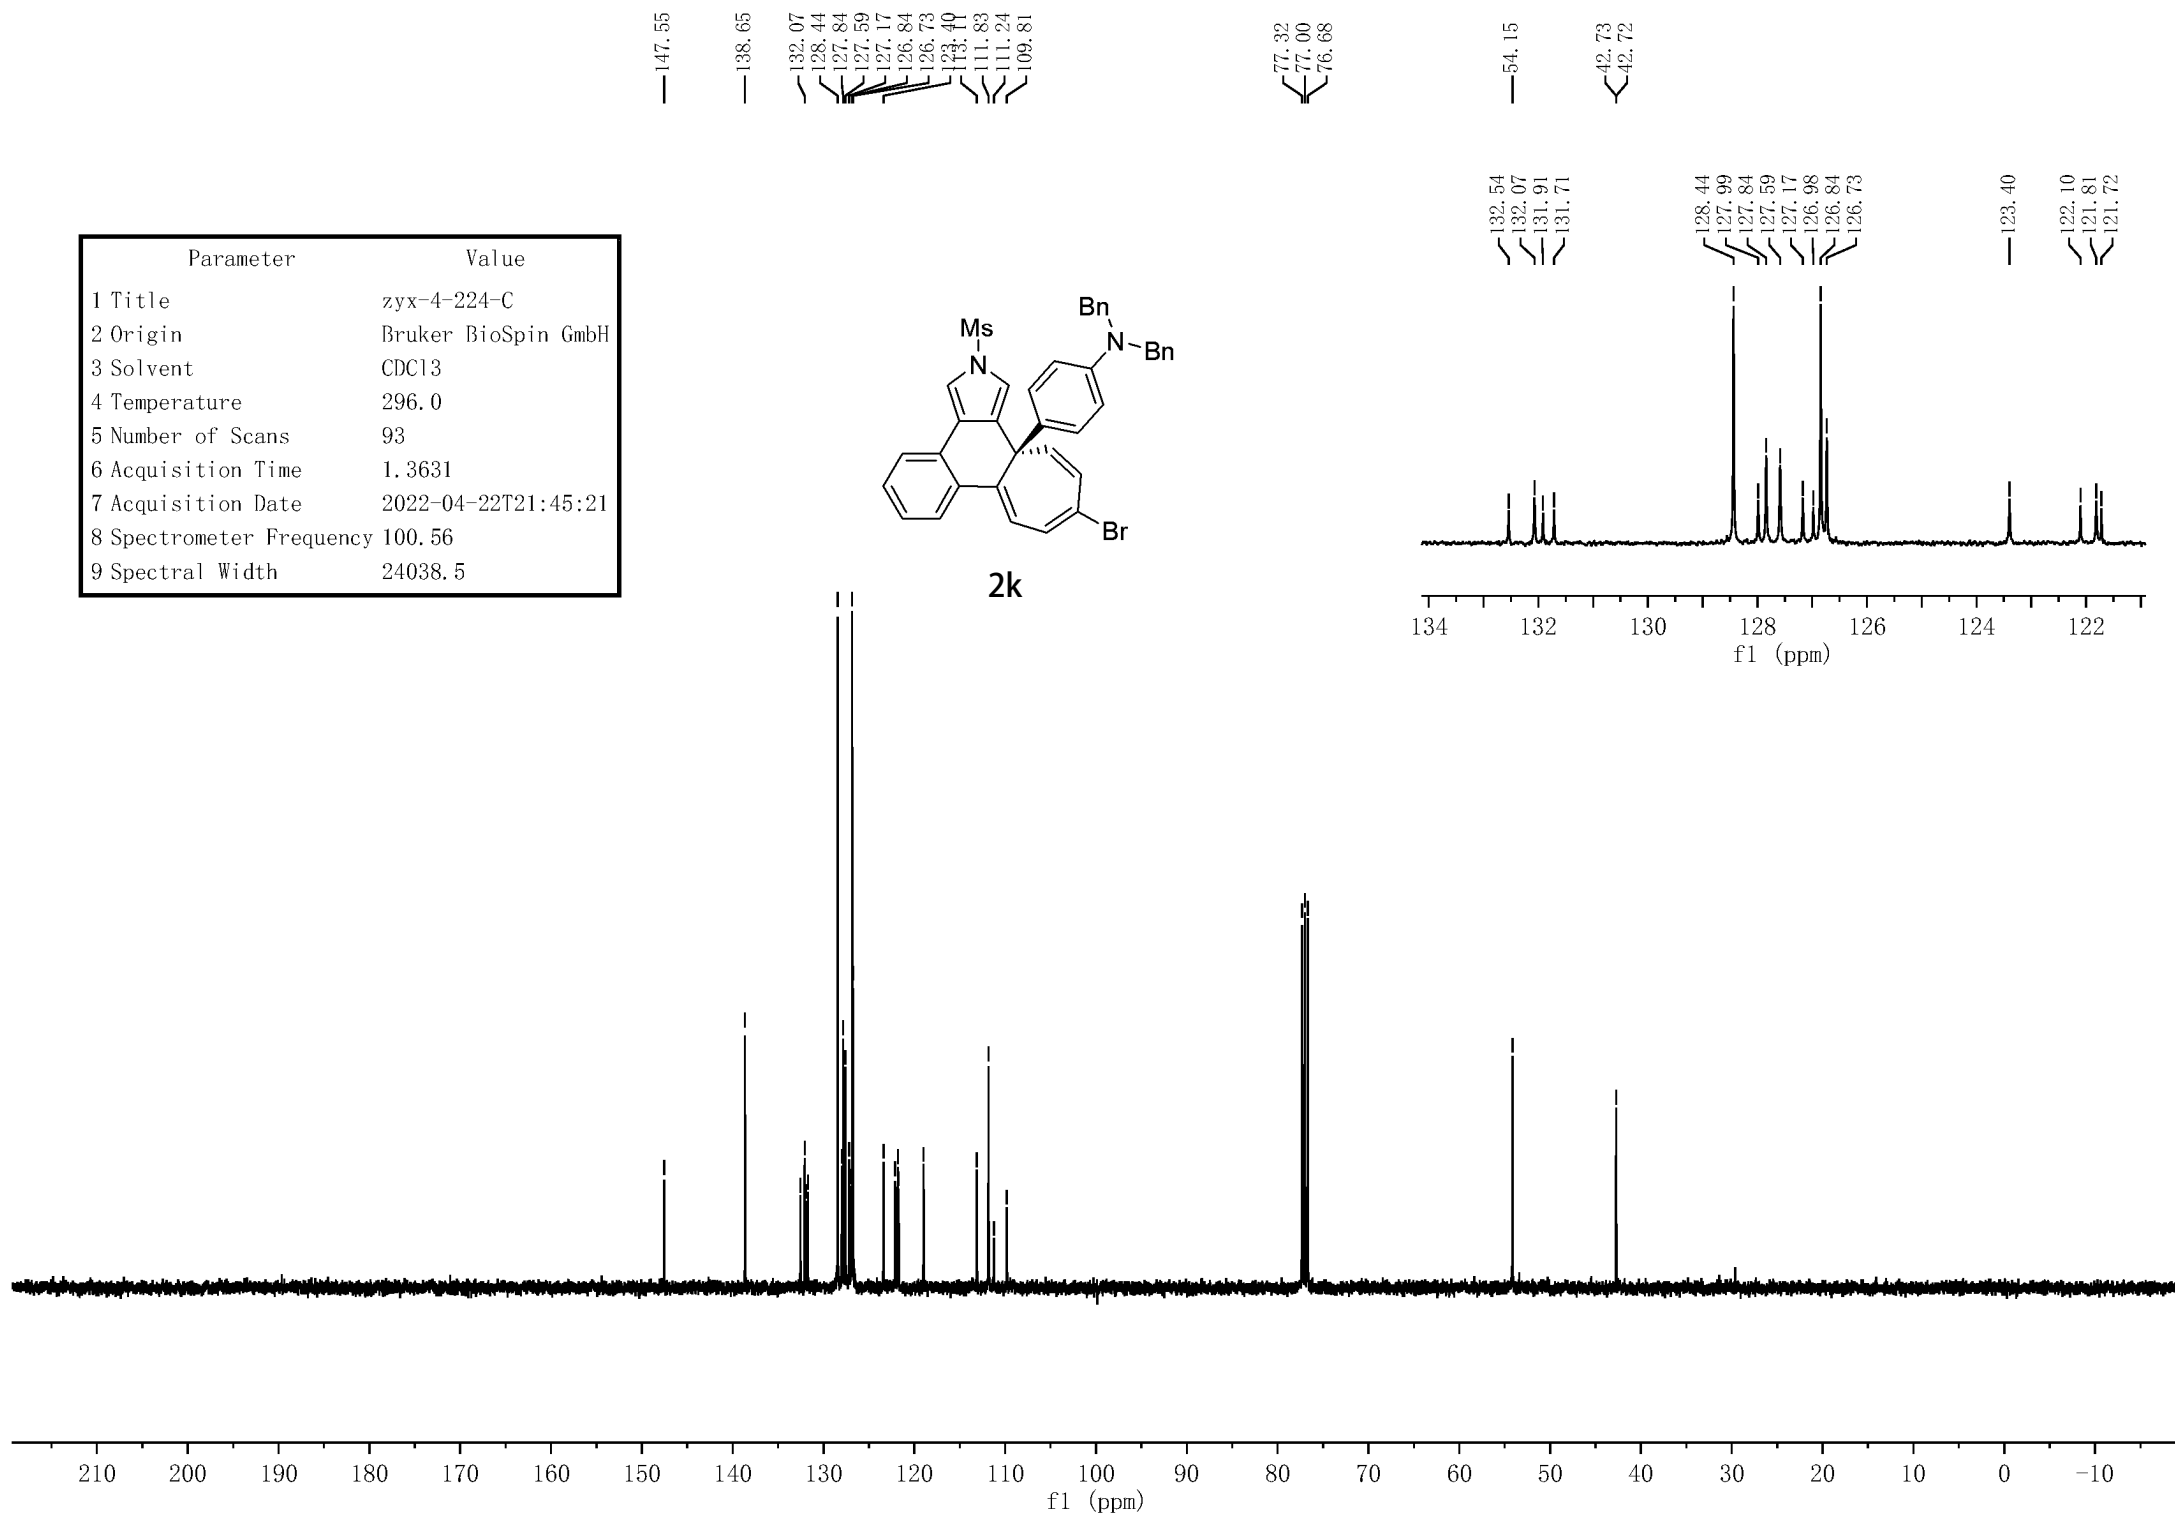

| Parameter                | Value               |
|--------------------------|---------------------|
| 1 Title                  | zyx-4-231-h         |
| 2 Origin                 | Bruker BioSpin GmbH |
| 3 Solvent                | CDCl3               |
| 4 Temperature            | 295.3               |
| 5 Number of Scans        | 8                   |
| 6 Acquisition Time       | 3.9846              |
| 7 Acquisition Date       | 2022-04-21T21:04:56 |
| 8 Spectrometer Frequency | 399.93              |
| 9 Spectral Width         | 8223.7              |

7.657  
7.639  
7.608  
7.605  
7.589  
7.586  
7.410  
7.405  
7.313  
7.295  
7.276  
7.267  
6.997  
6.974  
6.913  
6.893  
6.701  
6.695  
6.643  
6.640  
6.620  
6.598  
6.573  
6.550

4.913  
4.890

3.720

3.095

0.000

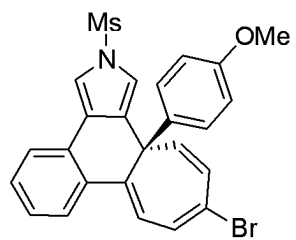

2I

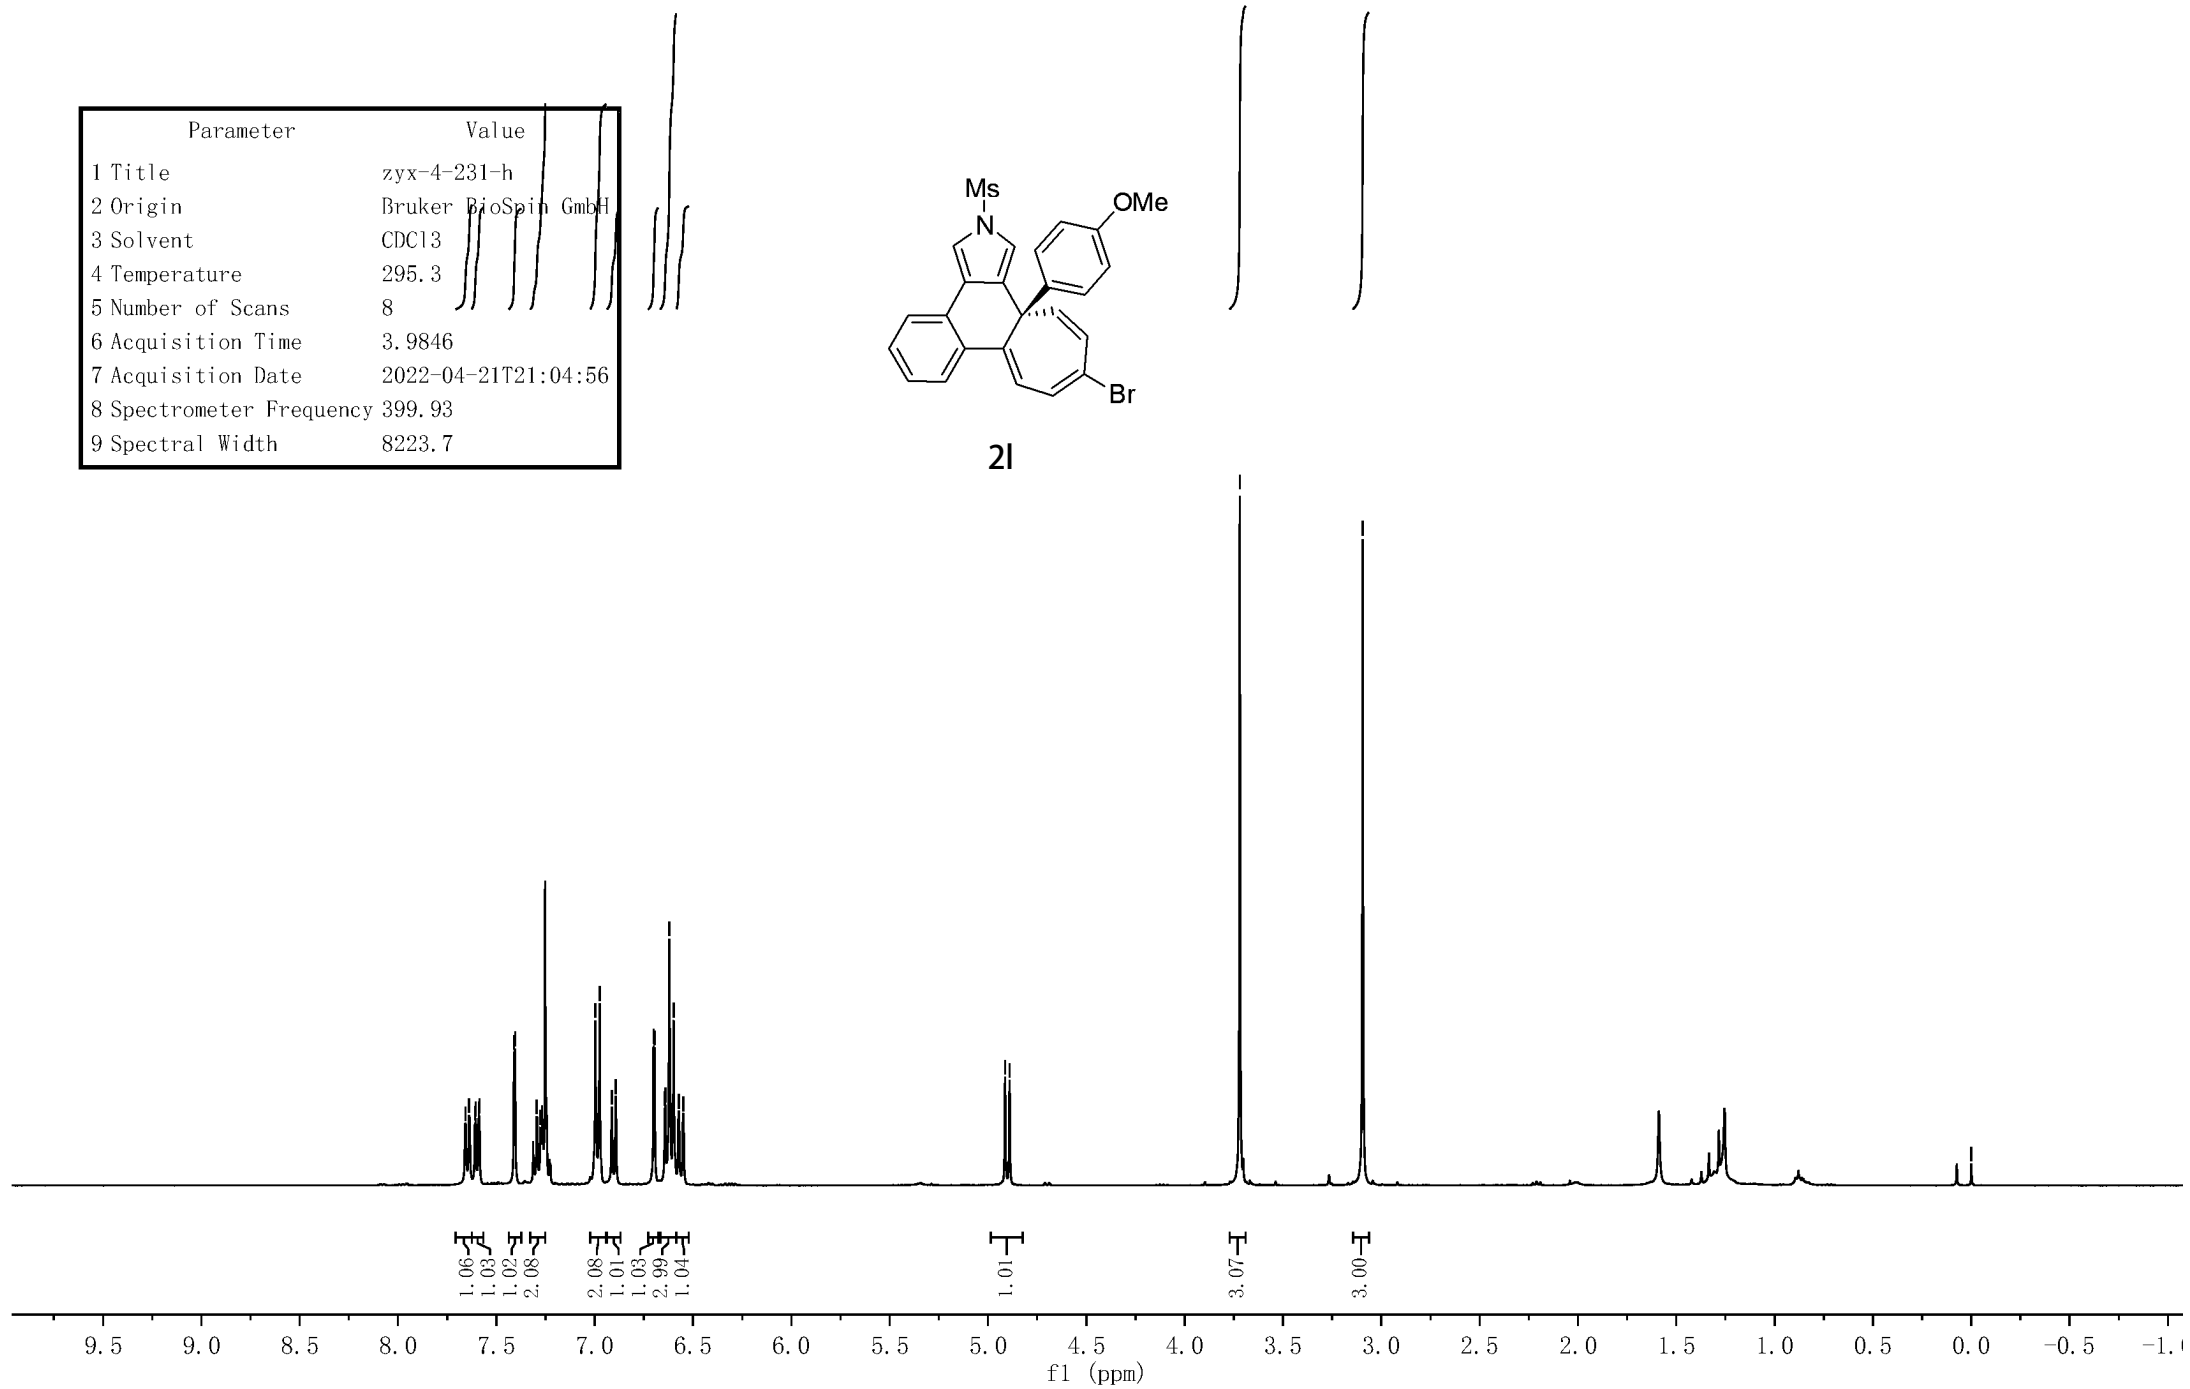

| Parameter                | Value               |
|--------------------------|---------------------|
| 1 Title                  | zyx-4-231-c         |
| 2 Origin                 | Bruker BioSpin GmbH |
| 3 Solvent                | CDCl3               |
| 4 Temperature            | 295.6               |
| 5 Number of Scans        | 86                  |
| 6 Acquisition Time       | 1.3631              |
| 7 Acquisition Date       | 2022-04-21T21:07:39 |
| 8 Spectrometer Frequency | 100.56              |
| 9 Spectral Width         | 24038.5             |

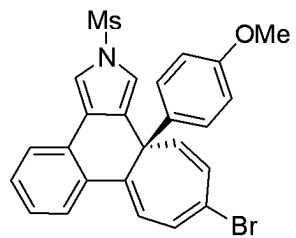

2I

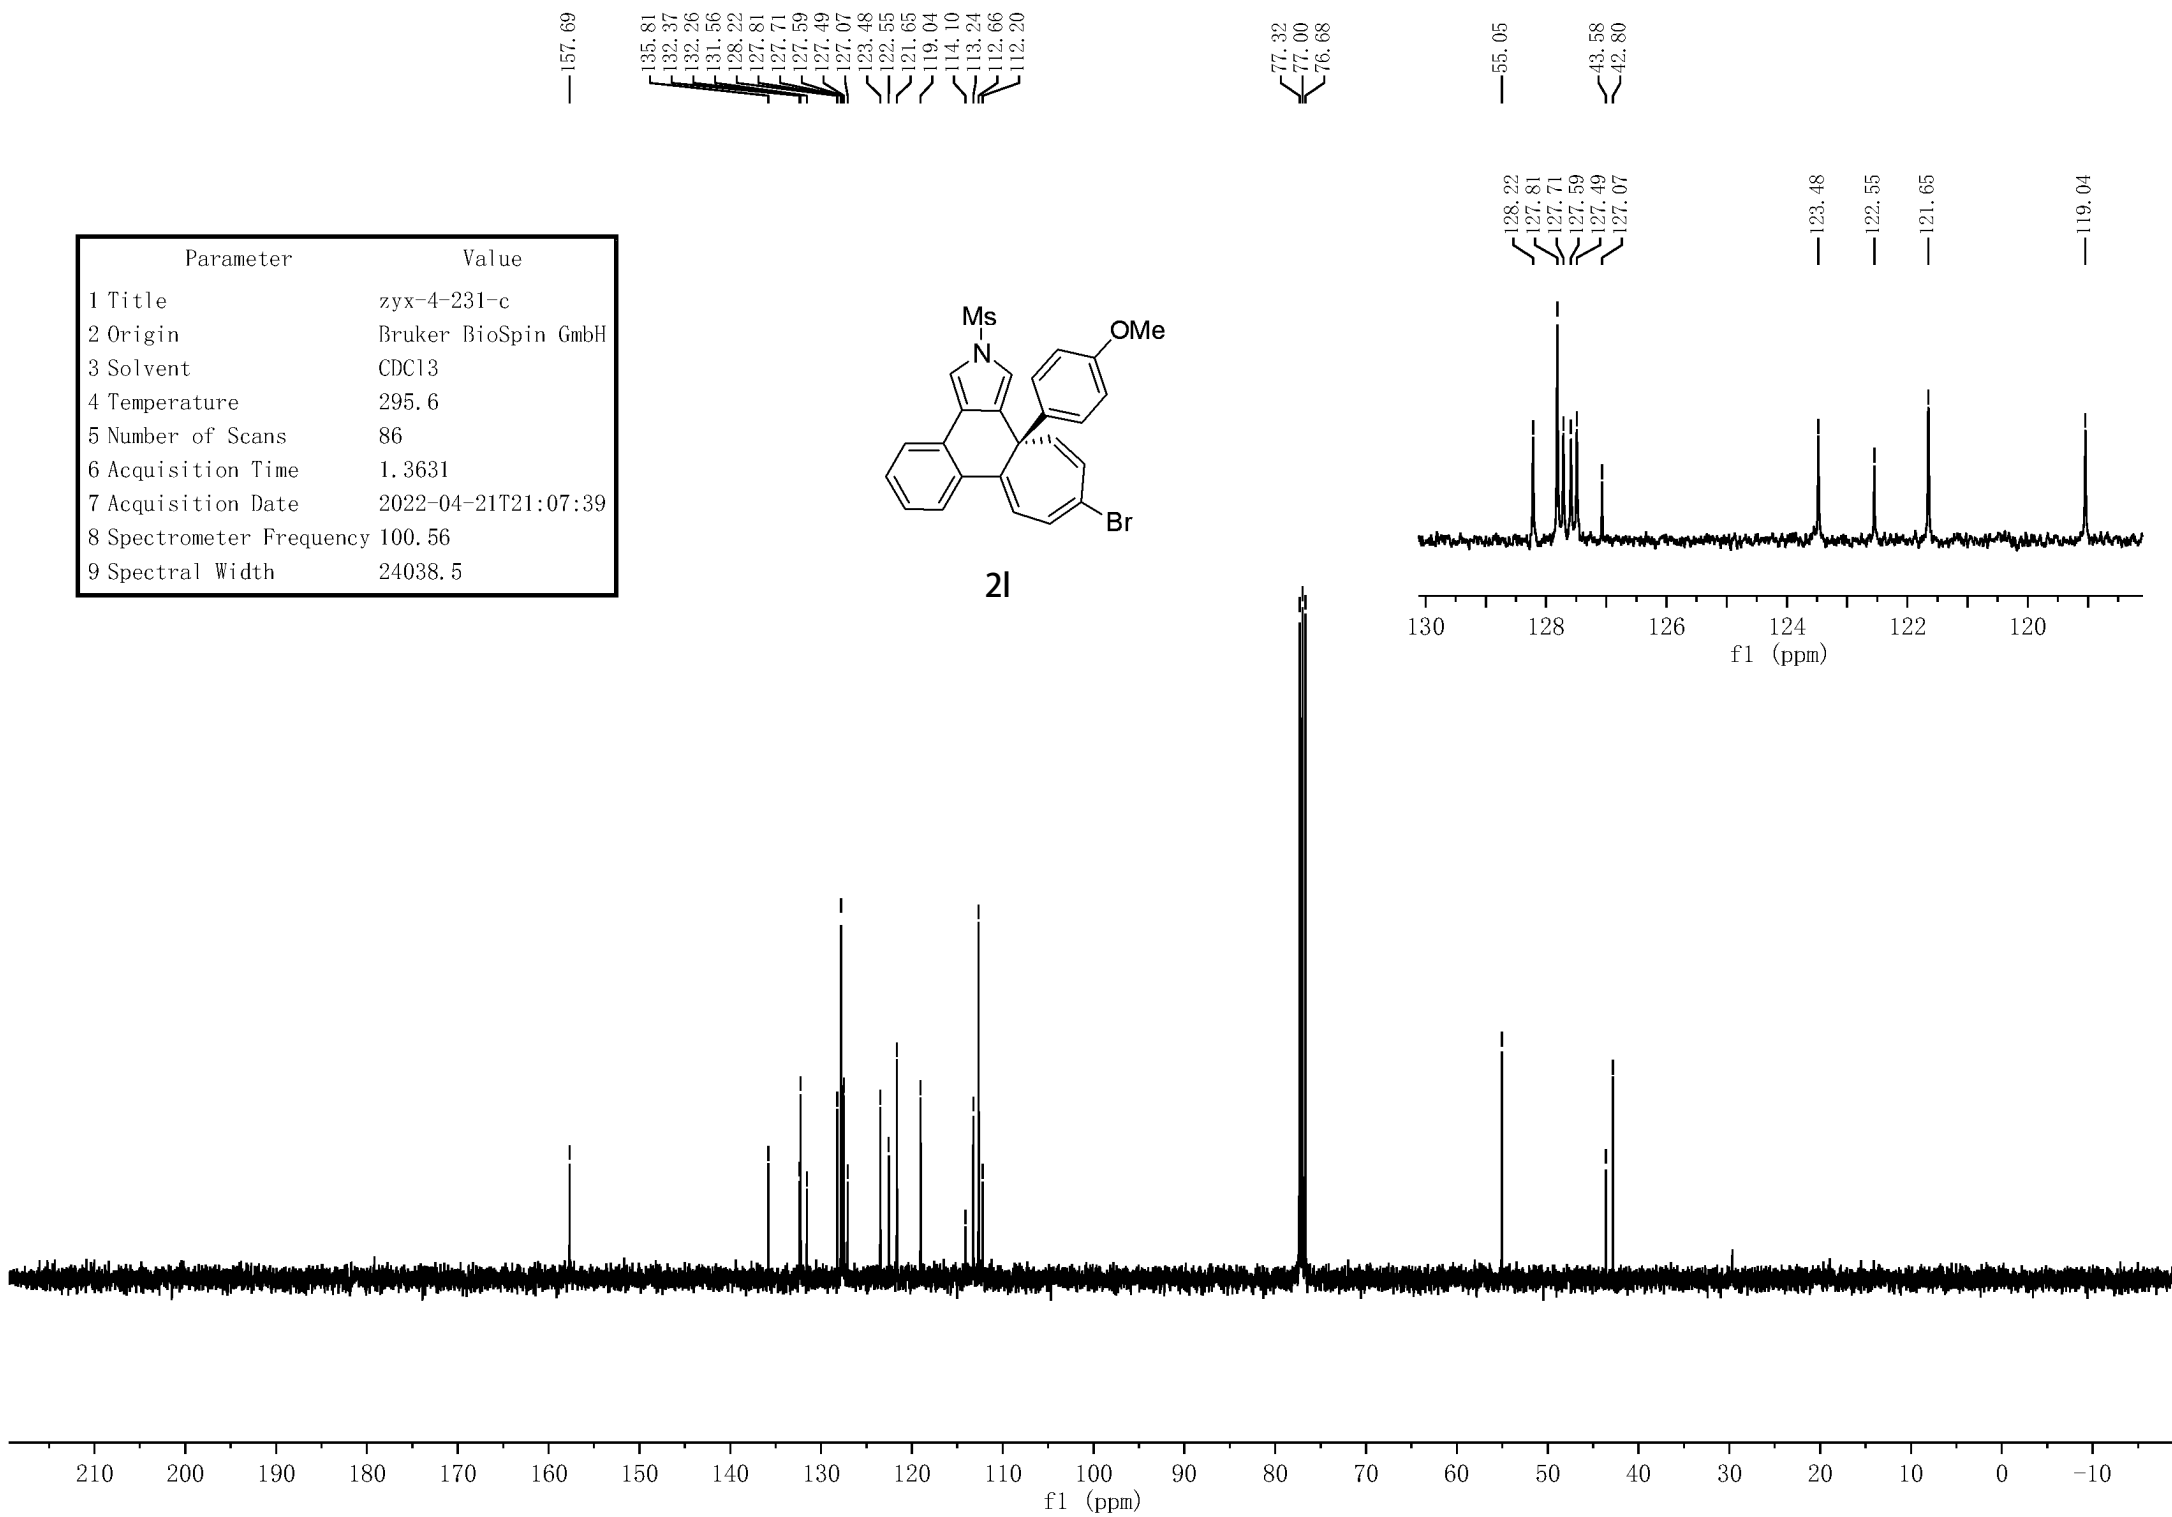

7.651  
7.631  
7.596  
7.578  
7.373  
7.344  
7.304  
7.265  
6.995  
6.910  
6.891  
6.703  
6.673  
6.648  
6.628  
6.569  
6.546

4.935  
4.910

3.075  
3.072

0.000

| Parameter                | Value               |
|--------------------------|---------------------|
| 1 Title                  | zyx-5-22-h          |
| 2 Origin                 | Bruker BioSpin GmbH |
| 3 Solvent                | CDCl3               |
| 4 Temperature            | 295.6               |
| 5 Number of Scans        | 11                  |
| 6 Acquisition Time       | 3.9846              |
| 7 Acquisition Date       | 2022-04-30T11:04:27 |
| 8 Spectrometer Frequency | 399.93              |
| 9 Spectral Width         | 8223.7              |

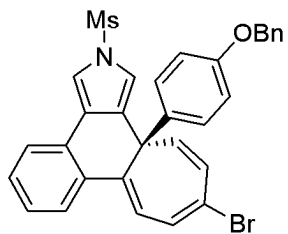

2m

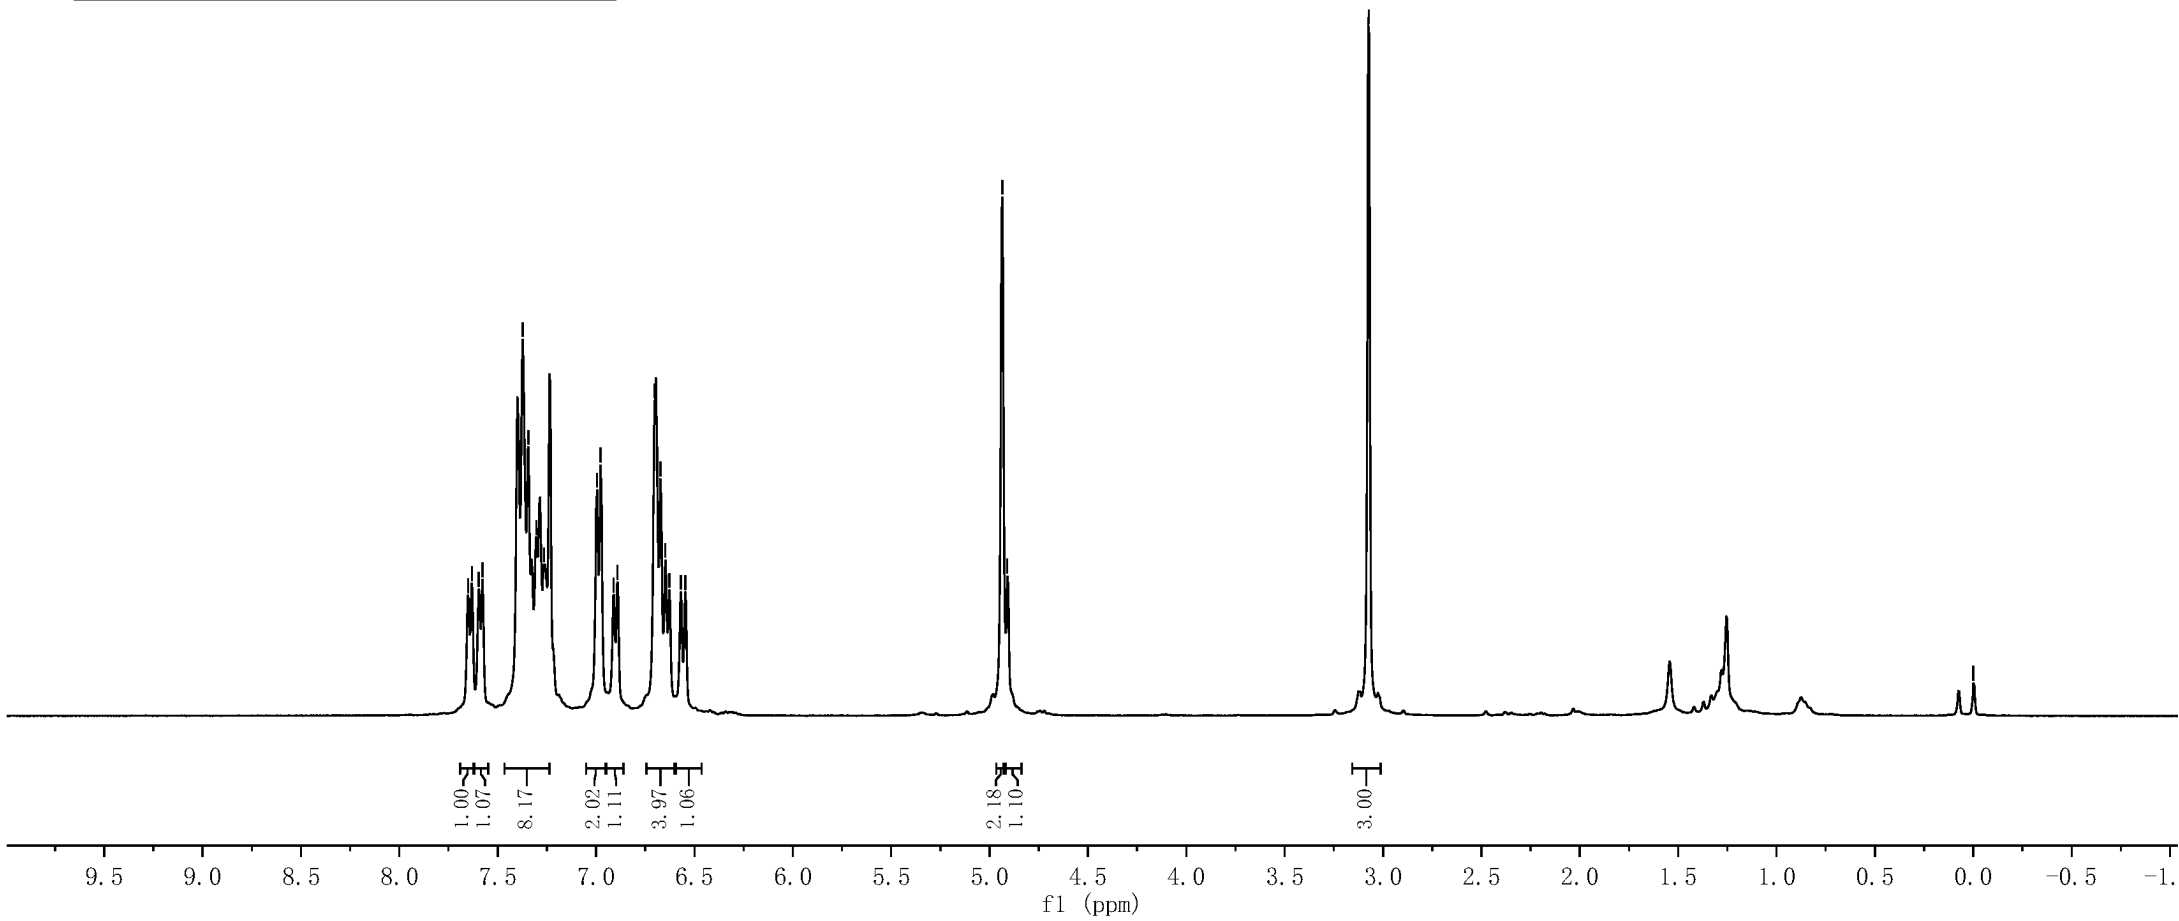

| Parameter                | Value               |
|--------------------------|---------------------|
| 1 Title                  | zyx-5-22-c          |
| 2 Origin                 | Bruker BioSpin GmbH |
| 3 Solvent                | CDCl3               |
| 4 Temperature            | 295.8               |
| 5 Number of Scans        | 73                  |
| 6 Acquisition Time       | 1.3631              |
| 7 Acquisition Date       | 2022-04-30T11:08:06 |
| 8 Spectrometer Frequency | 100.56              |
| 9 Spectral Width         | 24038.5             |



2m

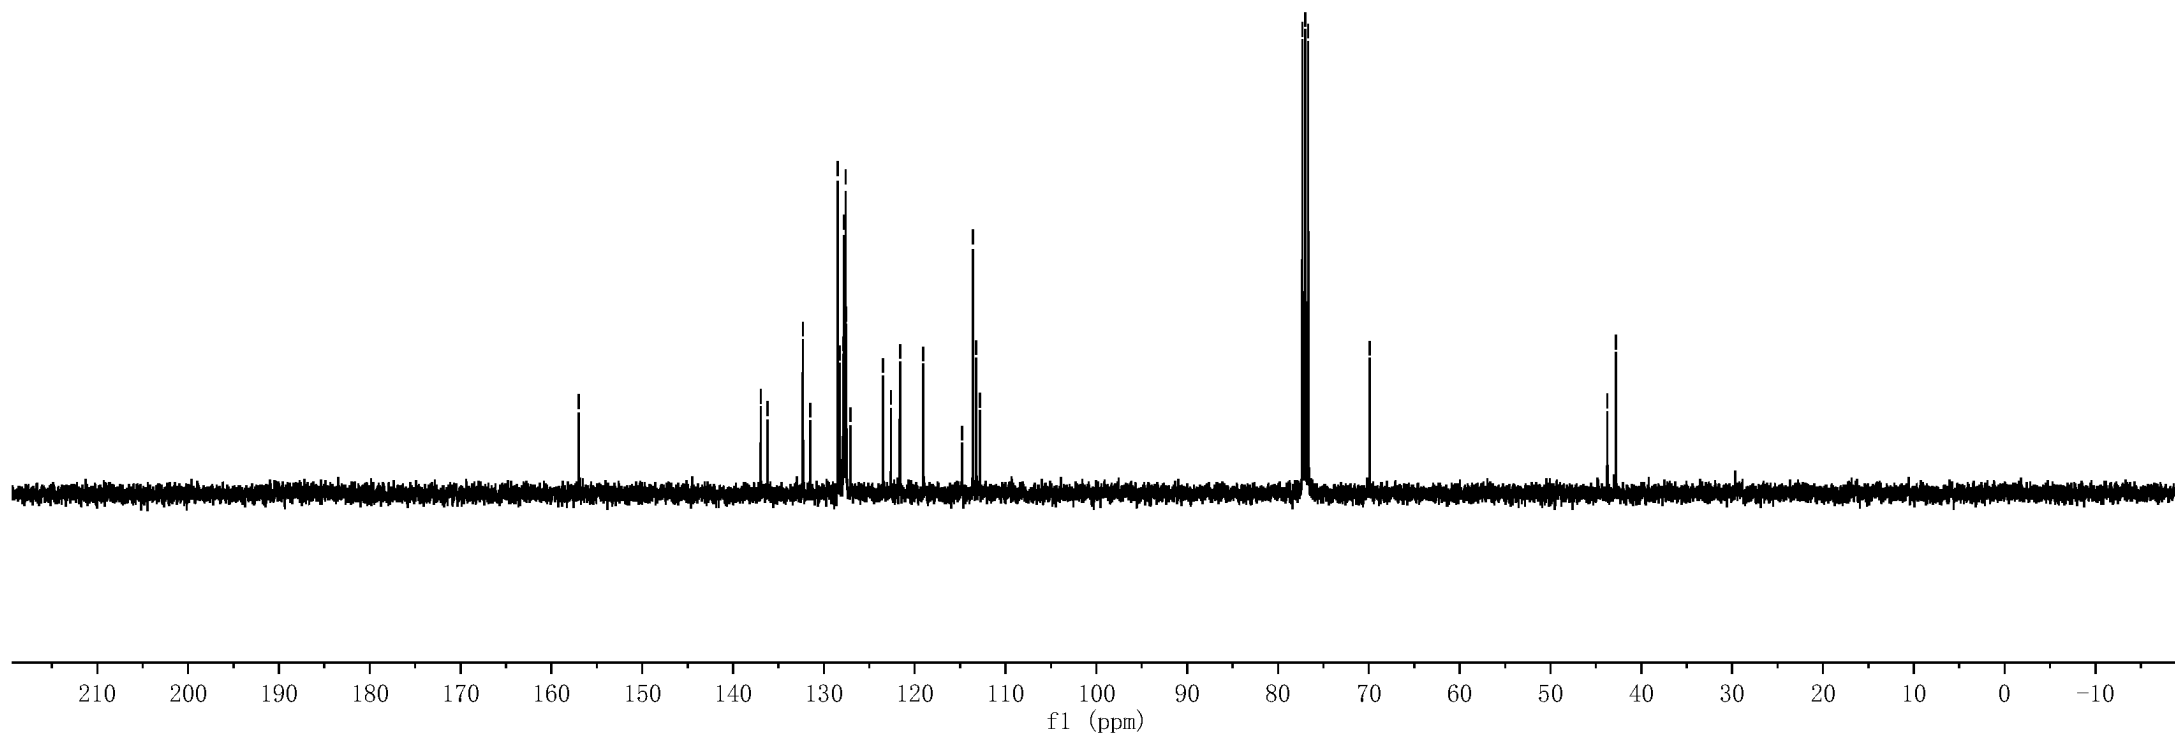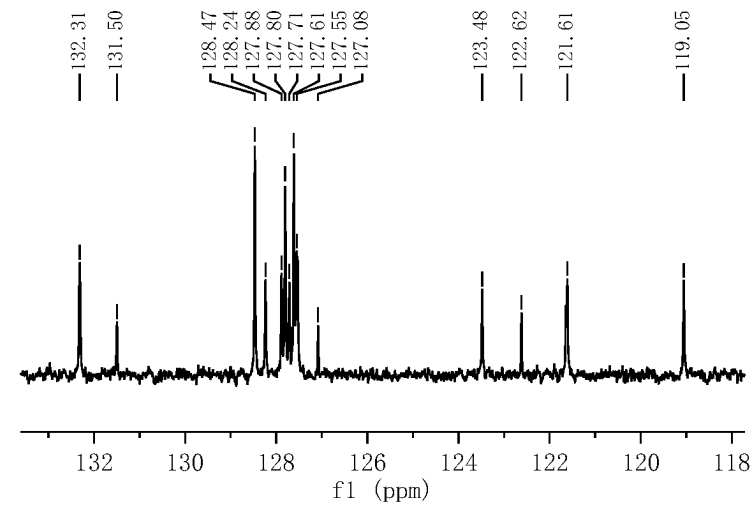



| Parameter                | Value               |
|--------------------------|---------------------|
| 1 Title                  | zyx-5-2-C           |
| 2 Origin                 | Bruker BioSpin GmbH |
| 3 Solvent                | CDCl3               |
| 4 Temperature            | 295.8               |
| 5 Number of Scans        | 55                  |
| 6 Acquisition Time       | 1.3631              |
| 7 Acquisition Date       | 2022-04-29T16:43:26 |
| 8 Spectrometer Frequency | 100.56              |
| 9 Spectral Width         | 24038.5             |

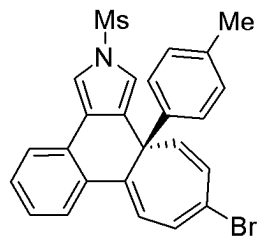

2n

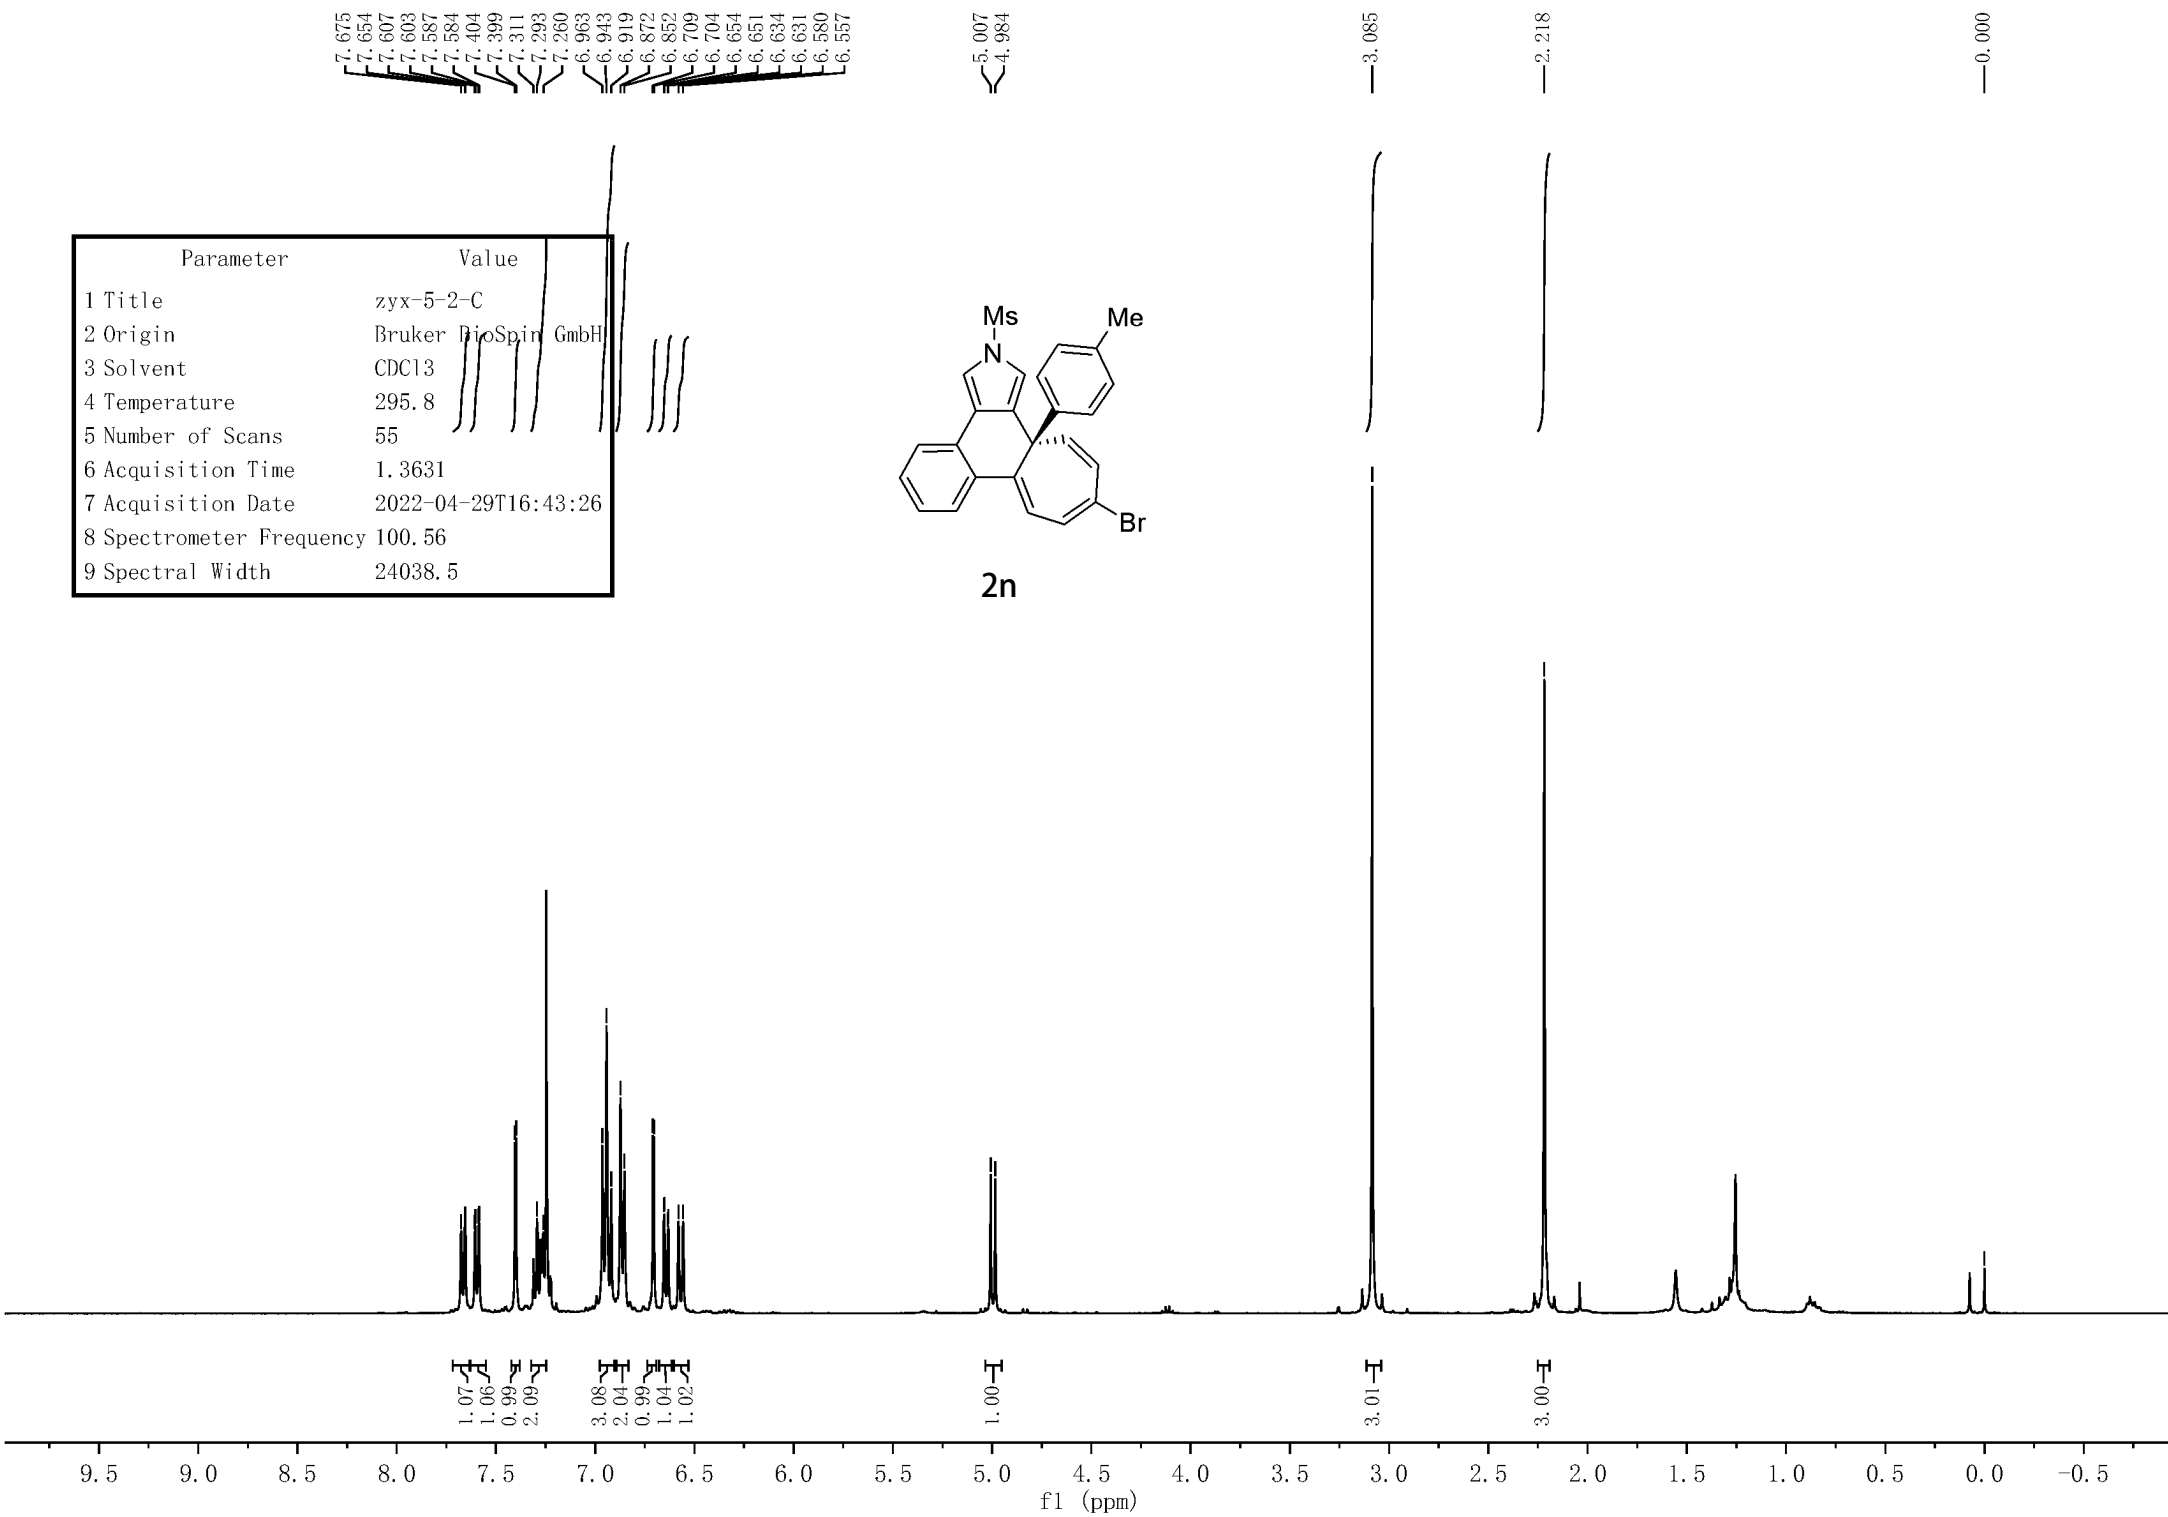

| Parameter                | Value               |
|--------------------------|---------------------|
| 1 Title                  | zyx-5-2-C           |
| 2 Origin                 | Bruker BioSpin GmbH |
| 3 Solvent                | CDCl3               |
| 4 Temperature            | 295.8               |
| 5 Number of Scans        | 55                  |
| 6 Acquisition Time       | 1.3631              |
| 7 Acquisition Date       | 2022-04-29T16:43:26 |
| 8 Spectrometer Frequency | 100.56              |
| 9 Spectral Width         | 24038.5             |

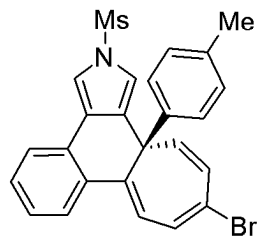

2n

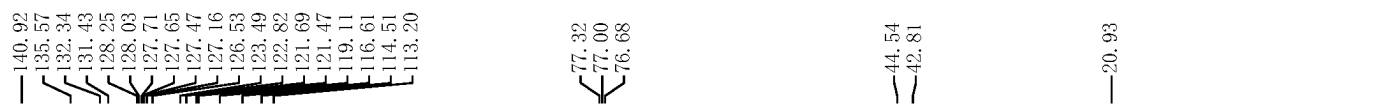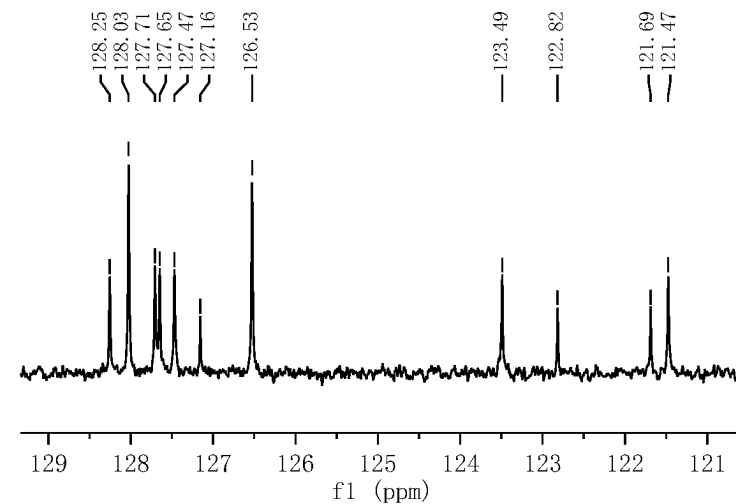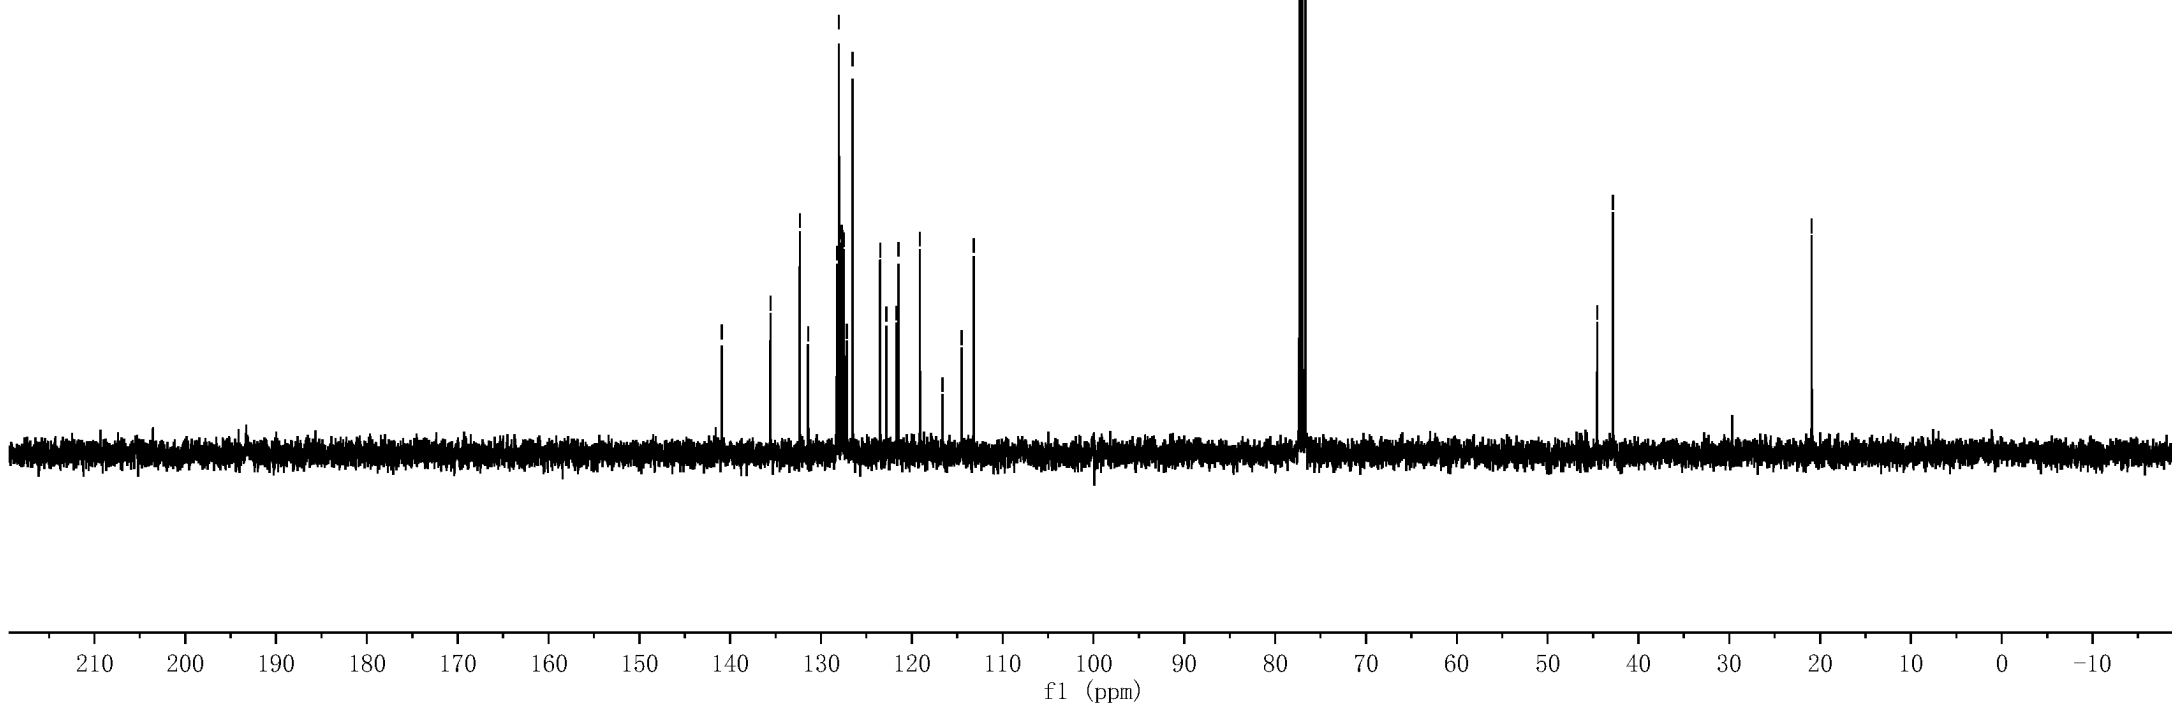

7.701  
7.681  
7.621  
7.617  
7.602  
7.598  
7.521  
7.501  
7.424  
7.419  
7.387  
7.366  
7.353  
7.317  
7.295  
7.271  
7.250  
7.144  
7.123  
6.991  
6.971  
6.766  
6.760  
6.695  
6.692  
6.676  
6.673  
6.619  
6.596

5.128  
5.105

3.070

-0.000

| Parameter                | Value               |
|--------------------------|---------------------|
| 1 Title                  | ZYX-5-9-H           |
| 2 Origin                 | Bruker Biospin GmbH |
| 3 Solvent                | CDCl3               |
| 4 Temperature            | 294.7               |
| 5 Number of Scans        | 10                  |
| 6 Acquisition Time       | 3.9846              |
| 7 Acquisition Date       | 2022-05-10T15:47:43 |
| 8 Spectrometer Frequency | 399.93              |
| 9 Spectral Width         | 8223.7              |

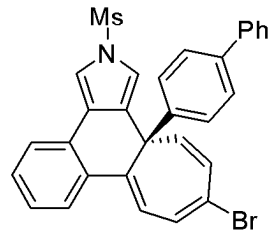

2o

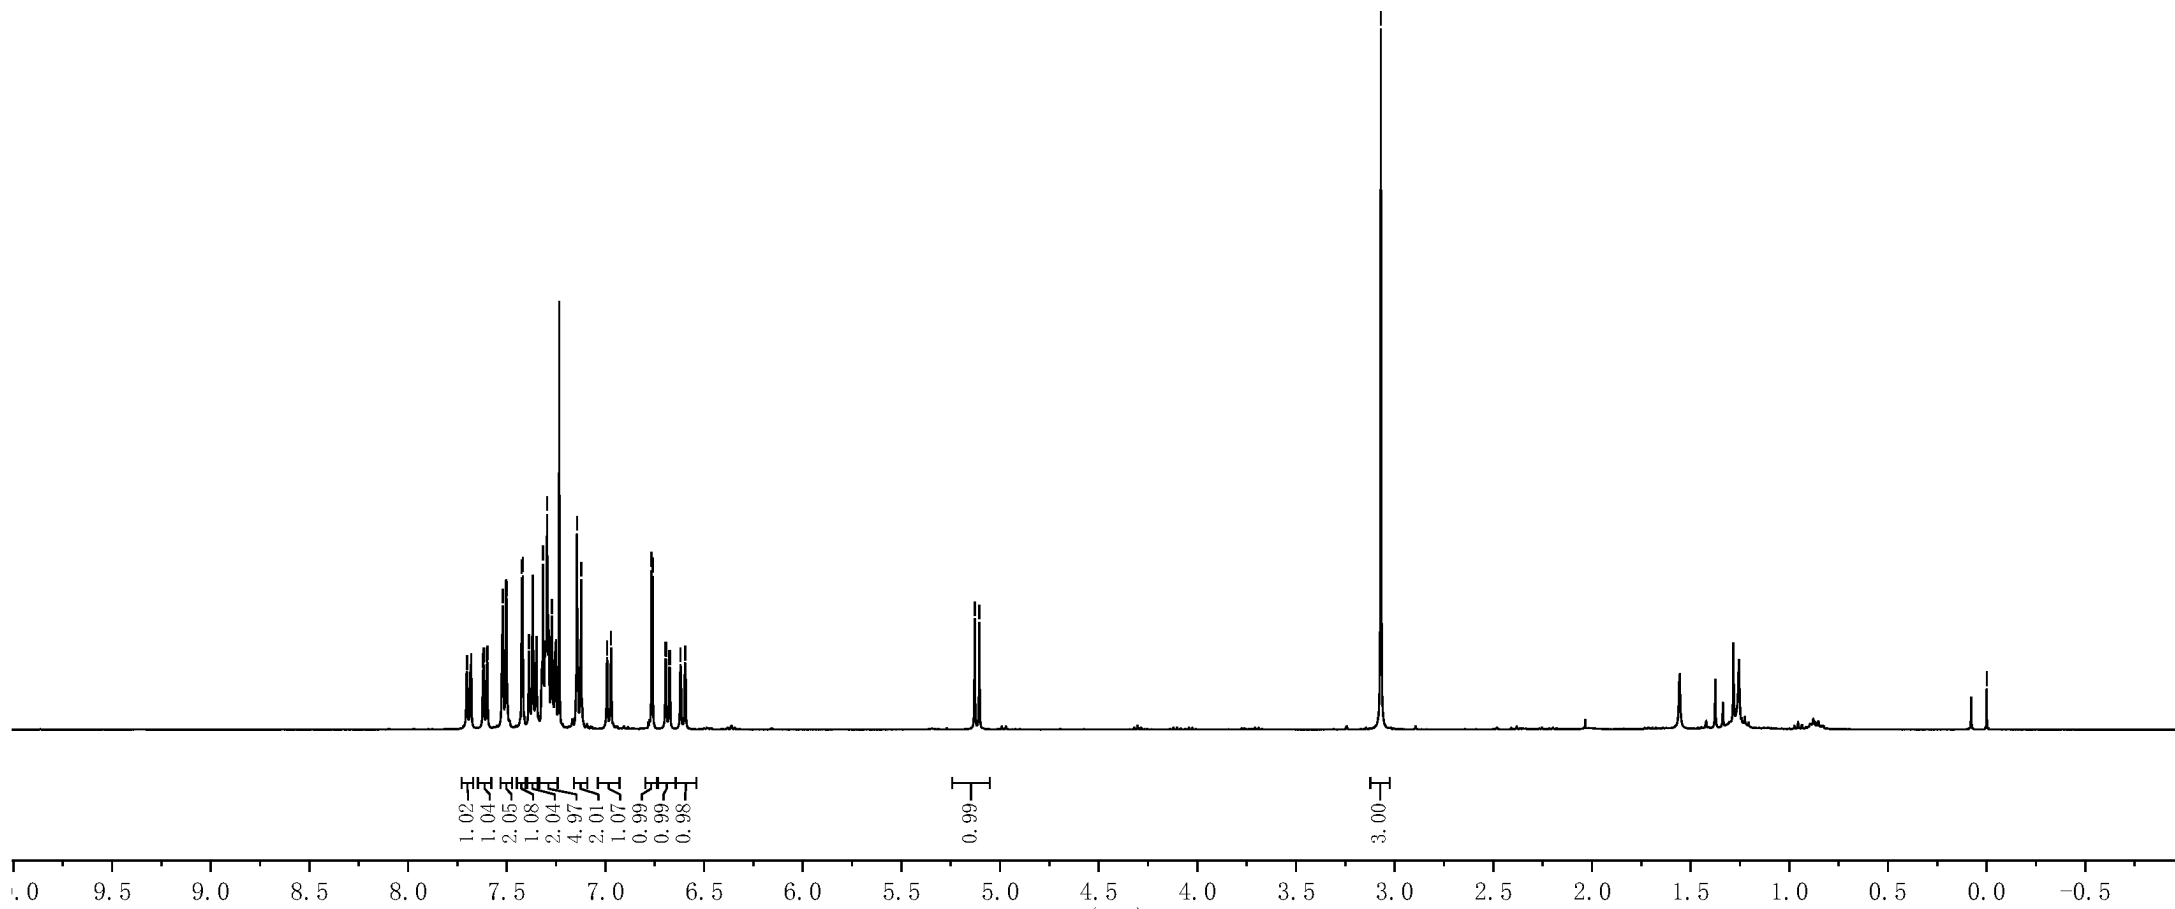

| Parameter                | Value               |
|--------------------------|---------------------|
| 1 Title                  | ZYX-5-9-C           |
| 2 Origin                 | Bruker BioSpin GmbH |
| 3 Solvent                | CDCl3               |
| 4 Temperature            | 294.9               |
| 5 Number of Scans        | 53                  |
| 6 Acquisition Time       | 1.3631              |
| 7 Acquisition Date       | 2022-05-10T15:49:00 |
| 8 Spectrometer Frequency | 100.56              |
| 9 Spectral Width         | 24038.5             |

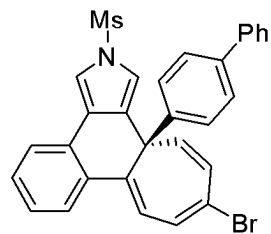

2o

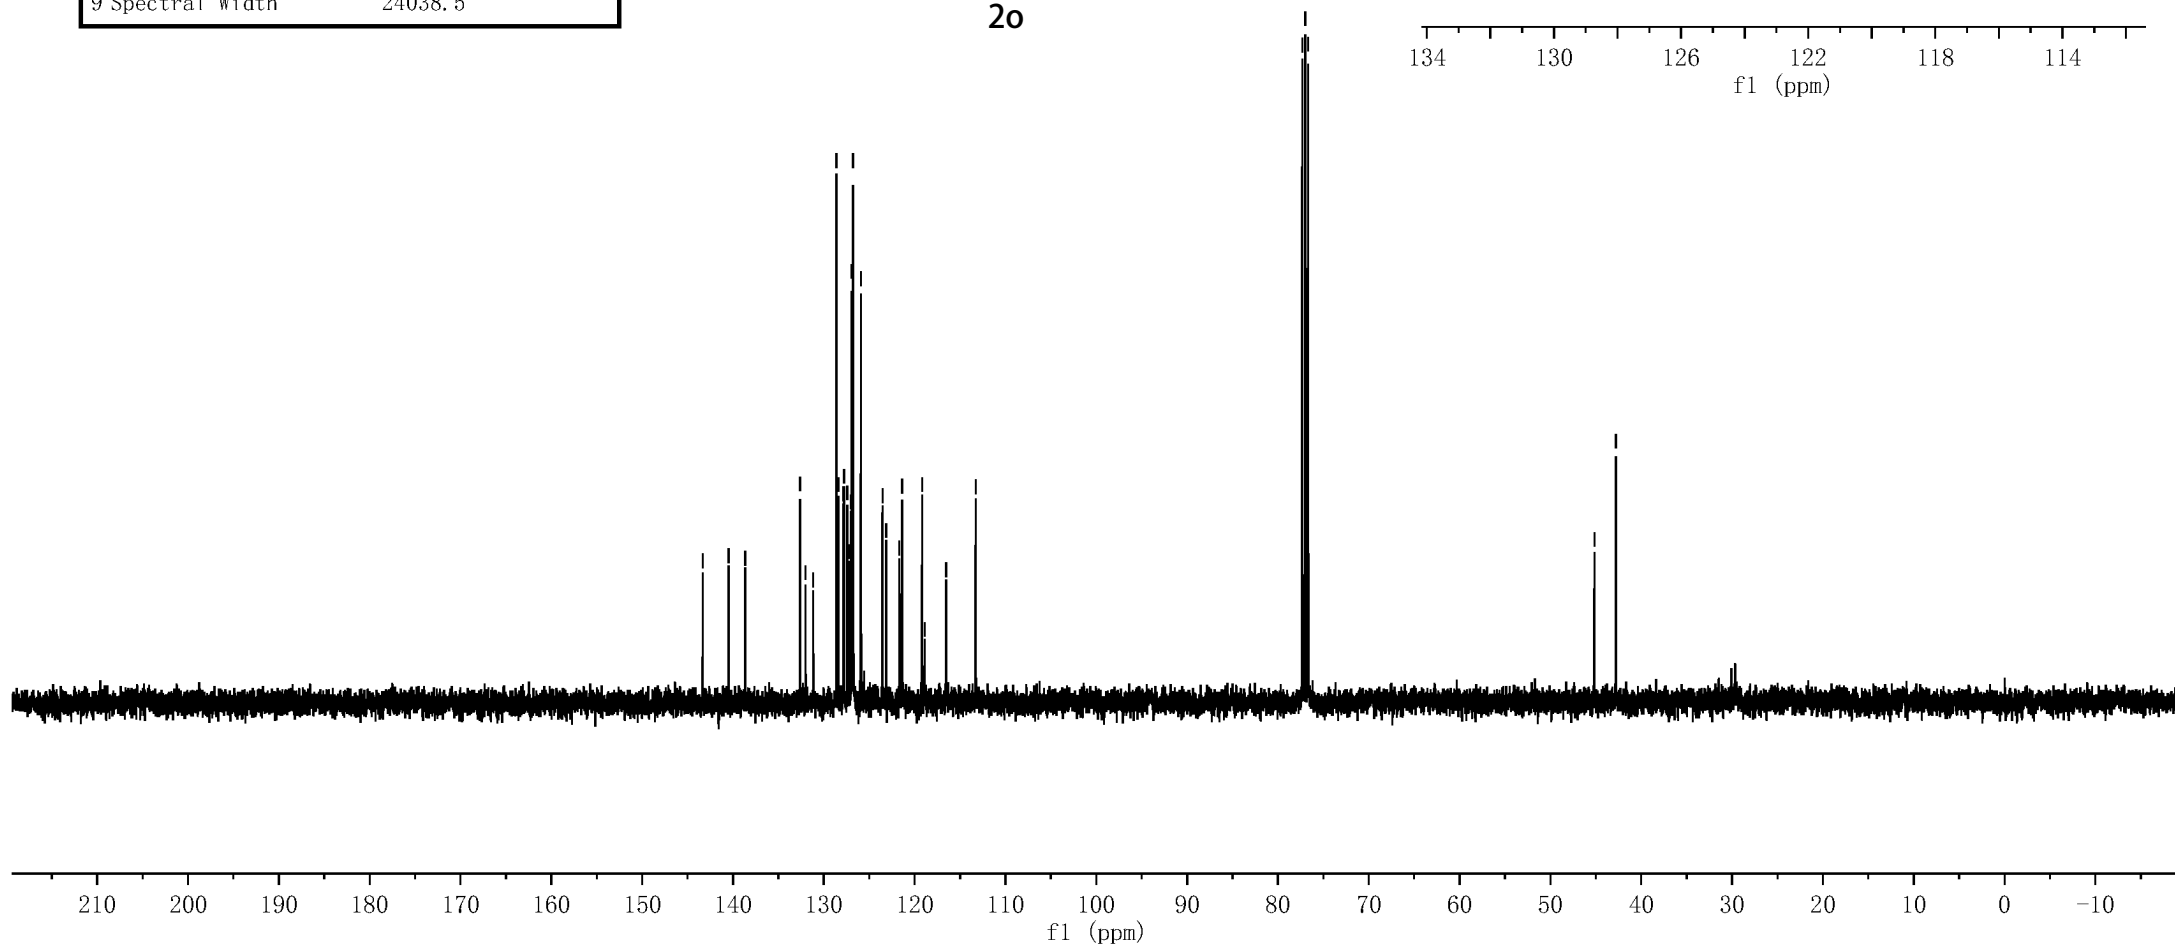

7.677  
7.657  
7.606  
7.588  
7.412  
7.407  
7.317  
7.300  
7.282  
7.265  
6.988  
6.969  
6.964  
6.698  
6.672  
6.653  
6.591  
6.567

5.040  
5.017

3.101

2.406

0.000

| Parameter                | Value               |
|--------------------------|---------------------|
| 1 Title                  | zyx-5-42            |
| 2 Origin                 |                     |
| 3 Solvent                | CDC13               |
| 4 Temperature            | 299.0               |
| 5 Number of Scans        | 16                  |
| 6 Acquisition Time       | 4.0002              |
| 7 Acquisition Date       | 2022-05-16T17:19:11 |
| 8 Spectrometer Frequency | 399.92              |
| 9 Spectral Width         | 8012.0              |

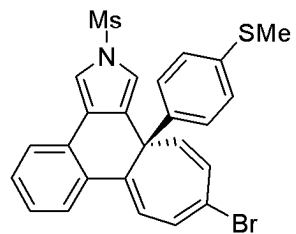

2p

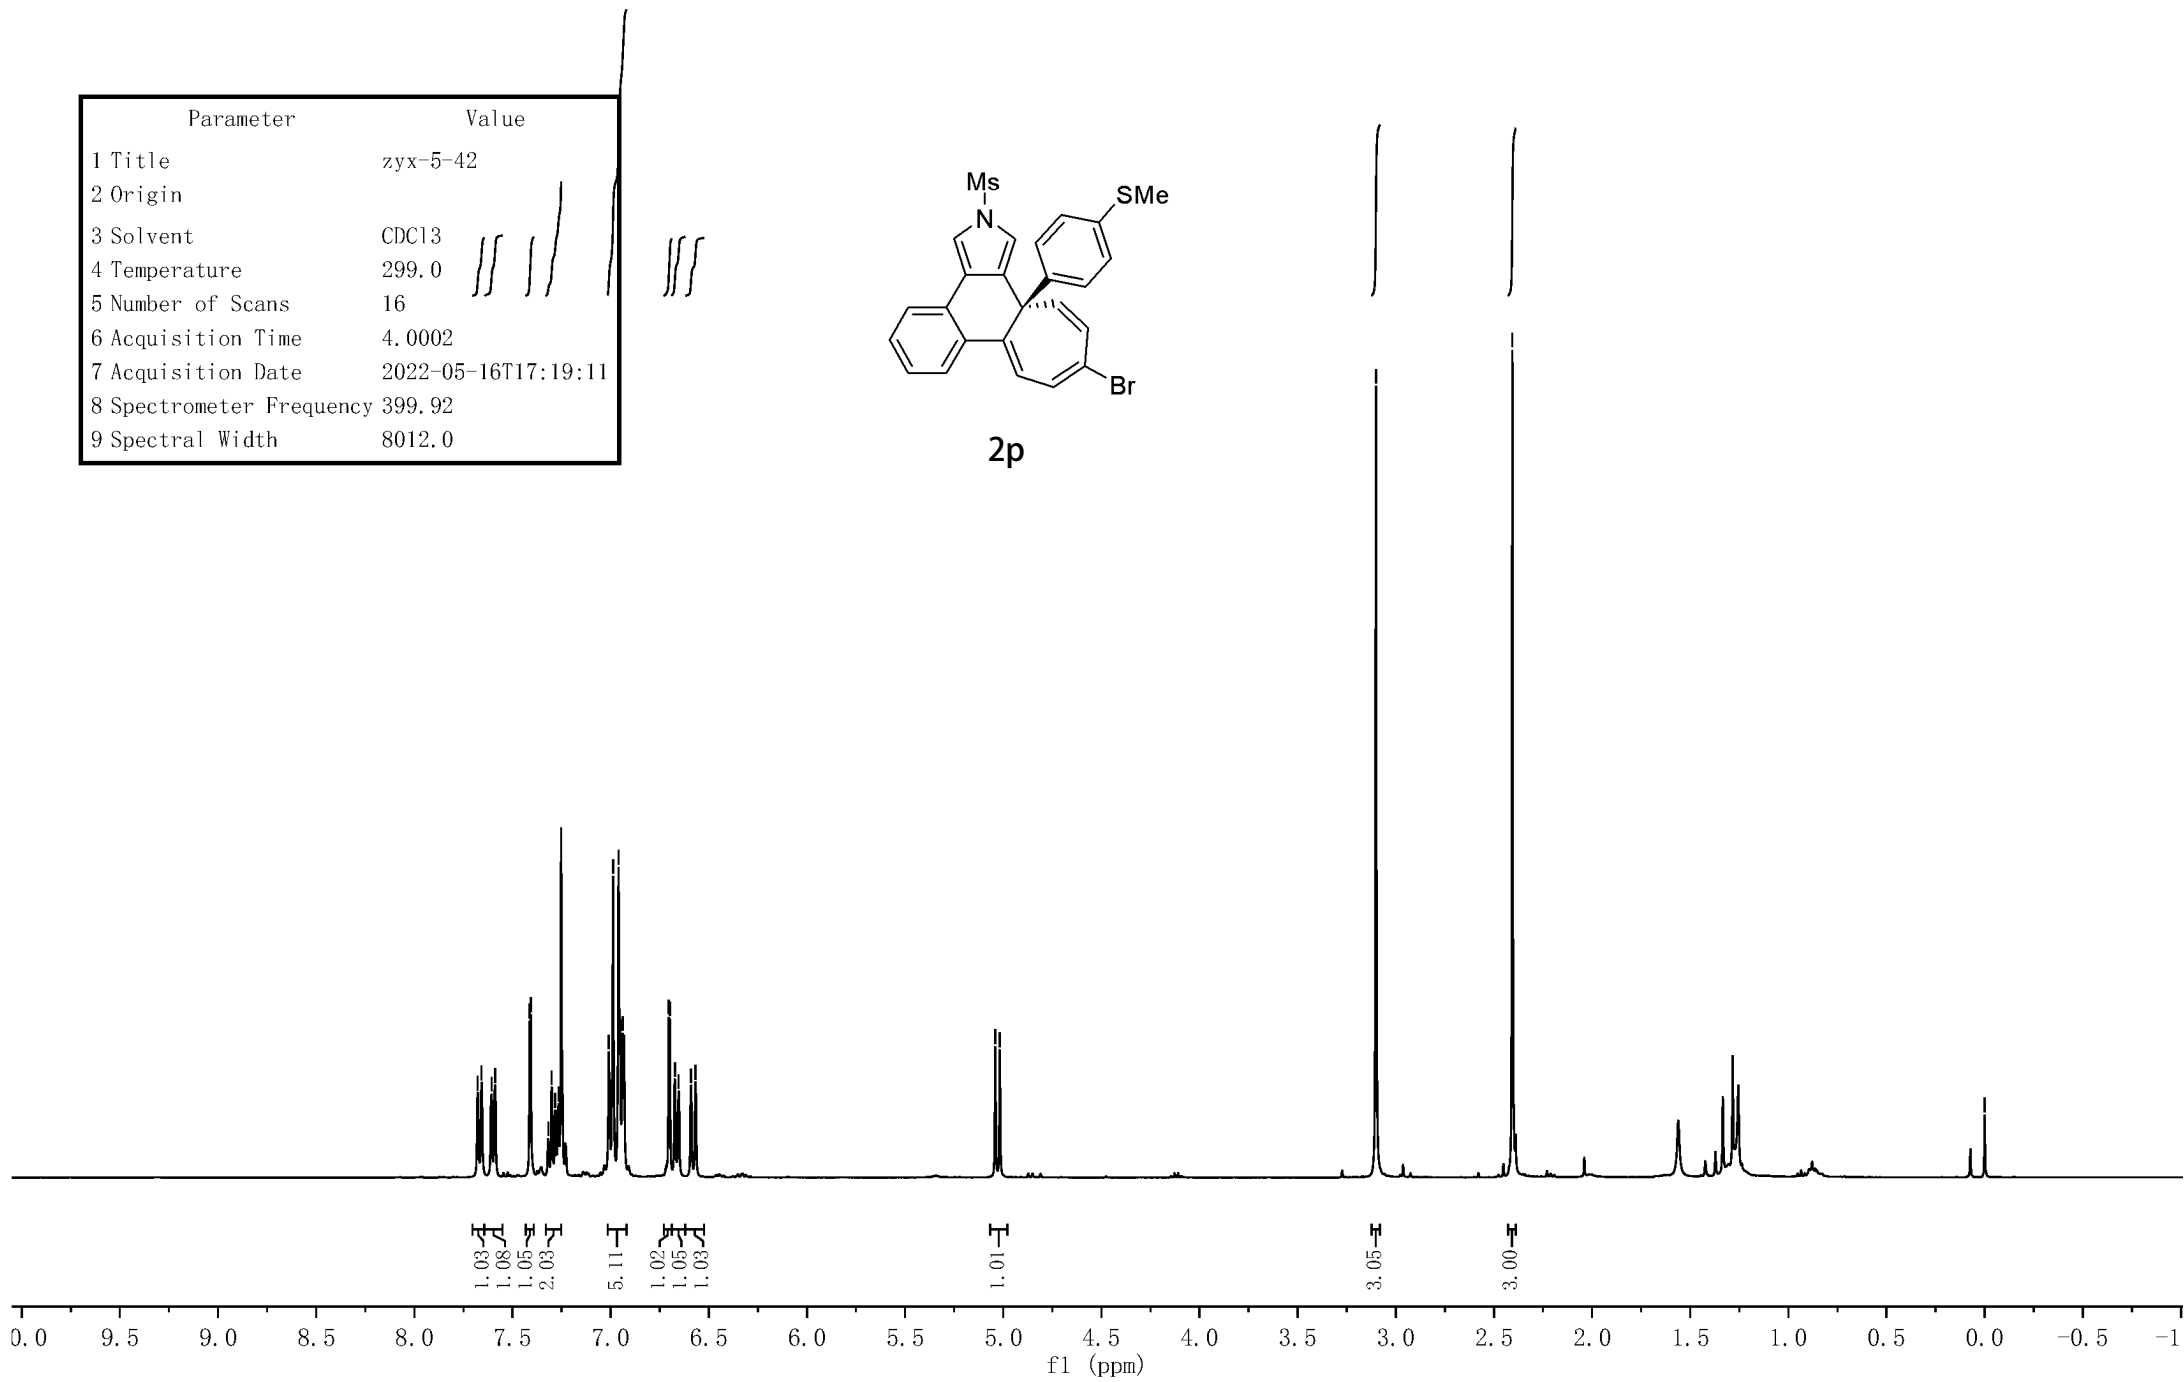

| Parameter                | Value               |
|--------------------------|---------------------|
| 1 Title                  | zyx-5-42            |
| 2 Origin                 |                     |
| 3 Solvent                | CDC13               |
| 4 Temperature            | 298.8               |
| 5 Number of Scans        | 500                 |
| 6 Acquisition Time       | 1.0000              |
| 7 Acquisition Date       | 2022-05-16T17:38:00 |
| 8 Spectrometer Frequency | 100.56              |
| 9 Spectral Width         | 26041.0             |



2p

141.04  
135.73  
132.53  
131.97  
131.21  
128.38  
127.78  
127.47  
127.15  
127.08  
125.47  
123.52  
122.98  
121.64  
121.42  
119.10  
117.52  
115.19  
113.28

77.32  
77.00  
76.68

44.69  
42.85

15.64

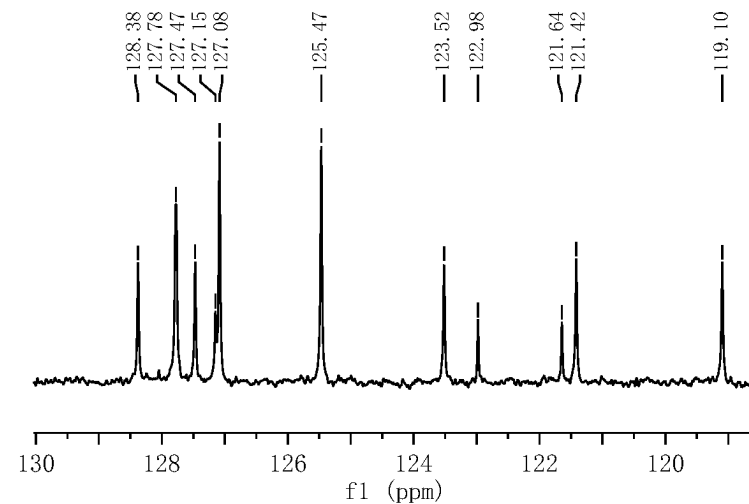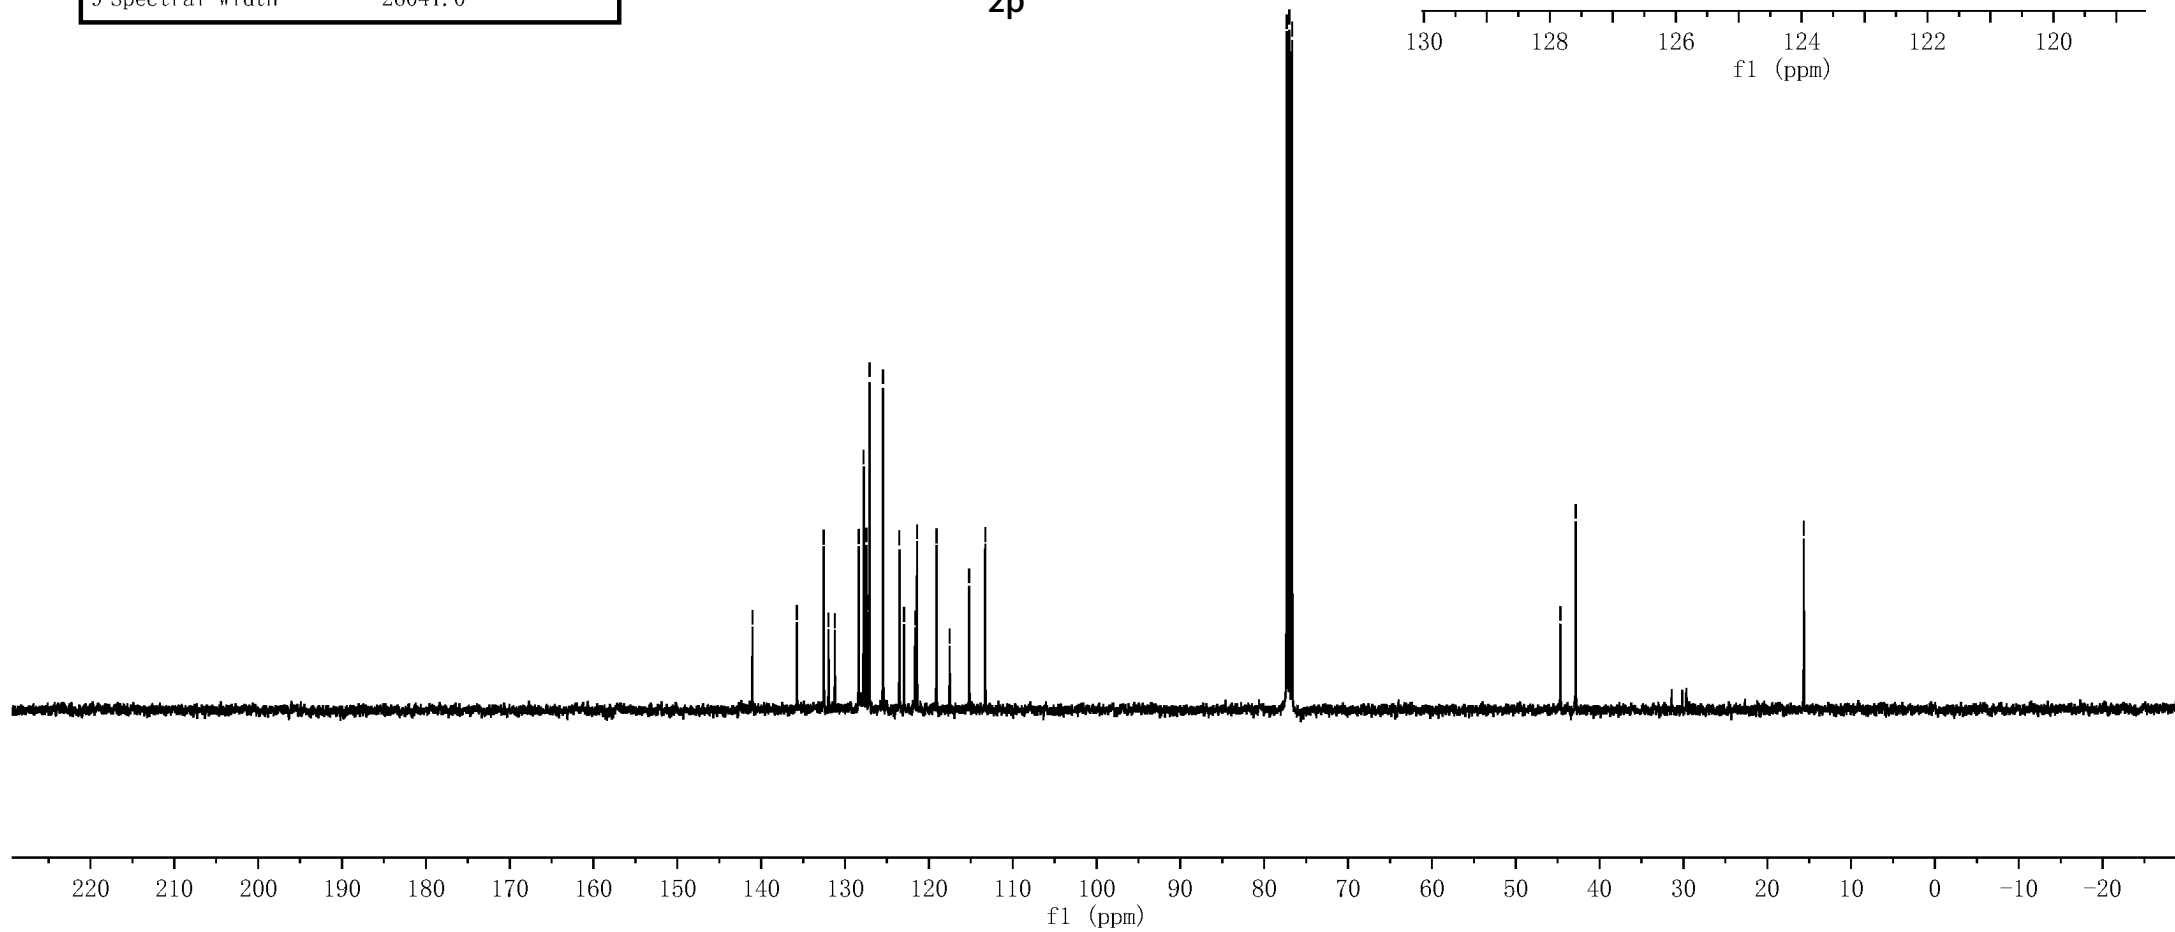

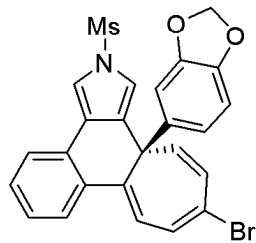

2q

| Parameter                | Value               |
|--------------------------|---------------------|
| 1 Title                  | zyx-4-240-h         |
| 2 Origin                 | Bruker BioSpin GmbH |
| 3 Solvent                | CDCl3               |
| 4 Temperature            | 295.6               |
| 5 Number of Scans        | 11                  |
| 6 Acquisition Time       | 3.9846              |
| 7 Acquisition Date       | 2022-04-22T21:32:46 |
| 8 Spectrometer Frequency | 399.93              |
| 9 Spectral Width         | 8223.7              |

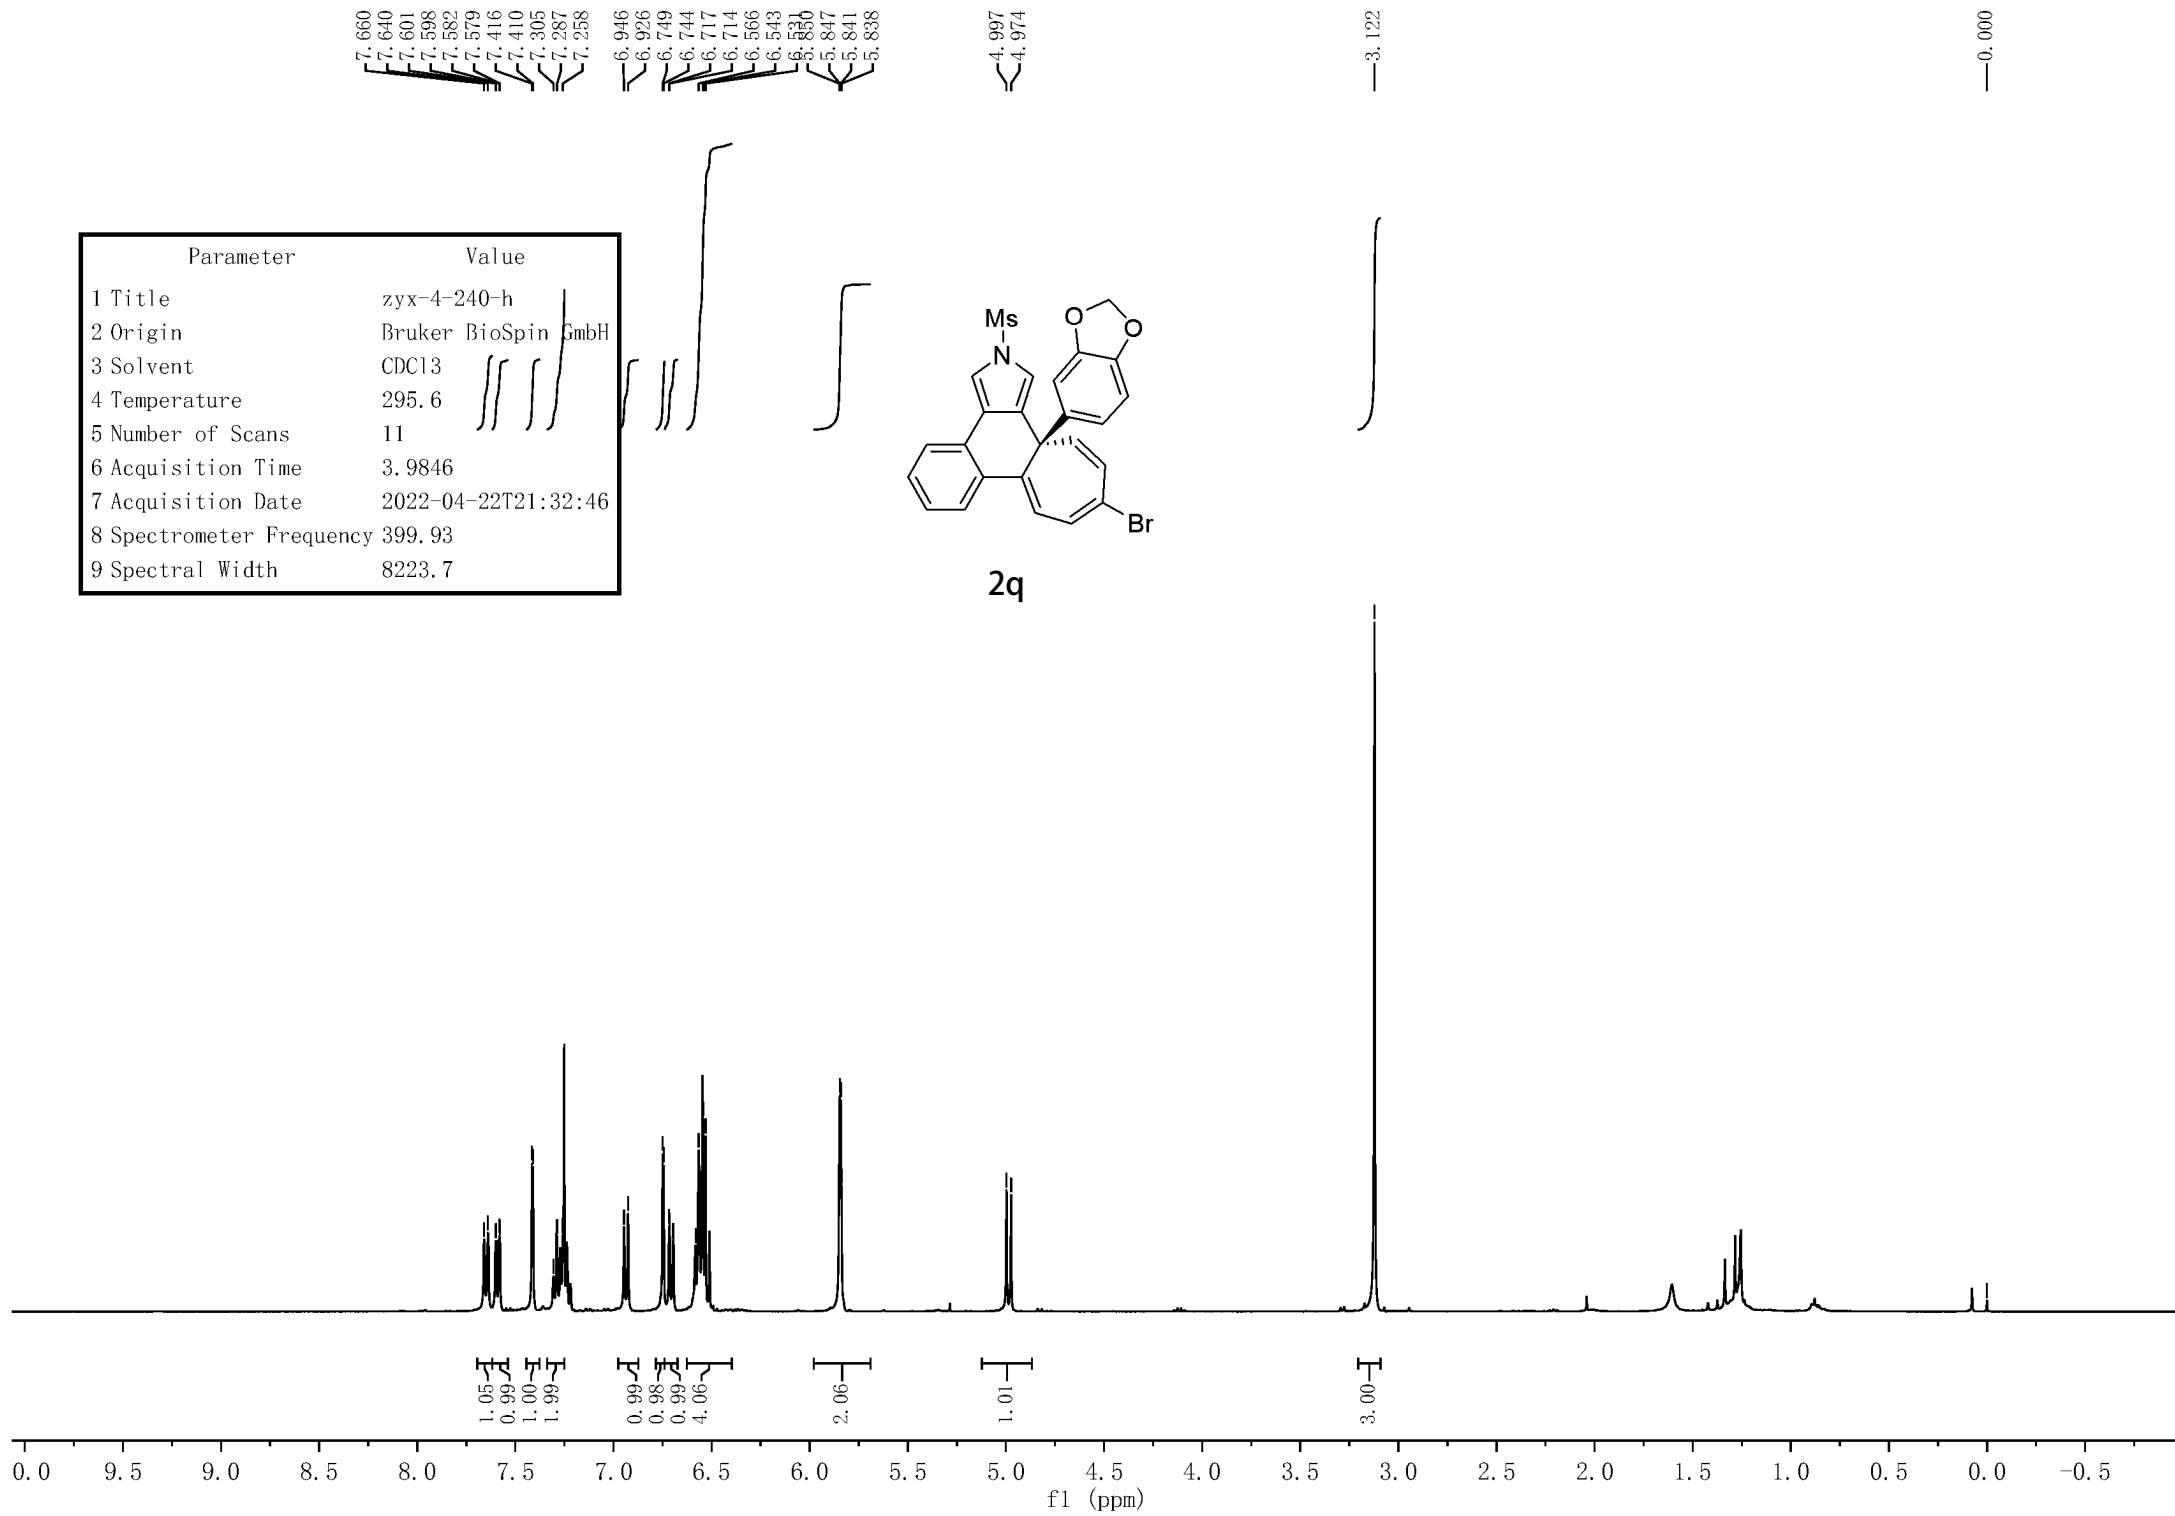

| Parameter                | Value               |
|--------------------------|---------------------|
| 1 Title                  | zyx-4-240-c         |
| 2 Origin                 | Bruker BioSpin GmbH |
| 3 Solvent                | CDCl3               |
| 4 Temperature            | 295.8               |
| 5 Number of Scans        | 58                  |
| 6 Acquisition Time       | 1.3631              |
| 7 Acquisition Date       | 2022-04-22T21:35:49 |
| 8 Spectrometer Frequency | 100.56              |
| 9 Spectral Width         | 24038.5             |

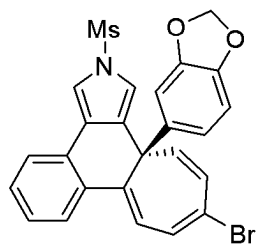

2q

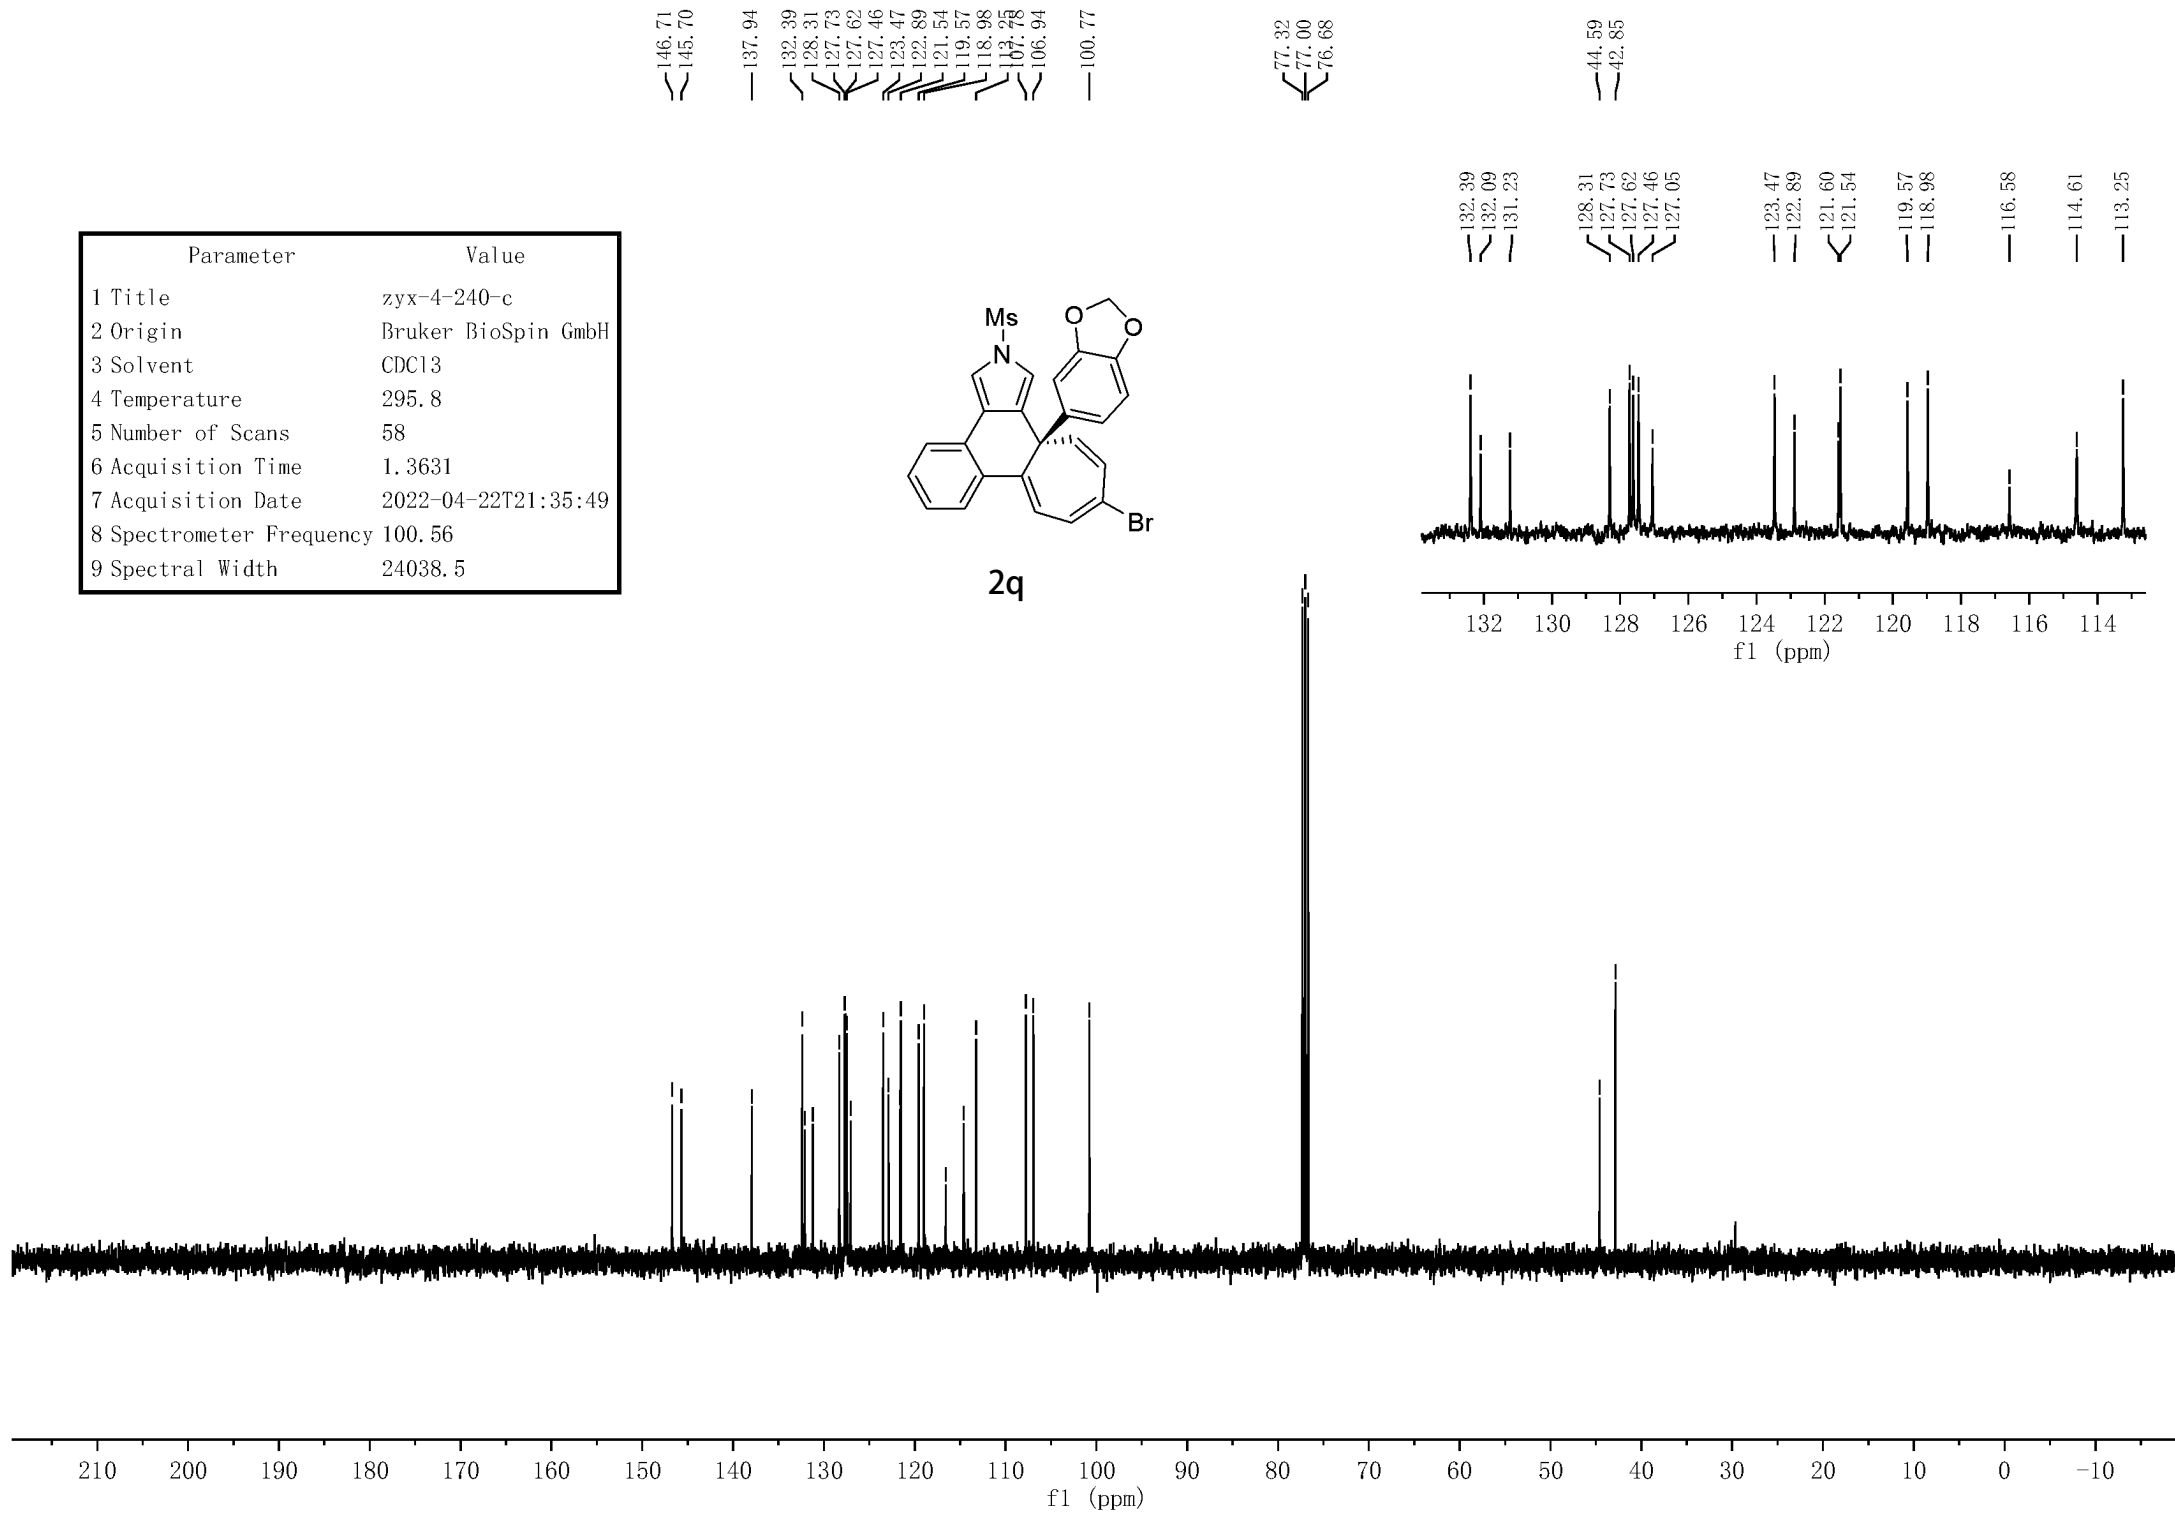



| Parameter                | Value               |
|--------------------------|---------------------|
| 1 Title                  | zyx-5-31-h          |
| 2 Origin                 | Bruker BioSpin GmbH |
| 3 Solvent                | CDCl3               |
| 4 Temperature            | 295.1               |
| 5 Number of Scans        | 9                   |
| 6 Acquisition Time       | 3.9846              |
| 7 Acquisition Date       | 2022-05-05T16:02:13 |
| 8 Spectrometer Frequency | 399.93              |
| 9 Spectral Width         | 8223.7              |

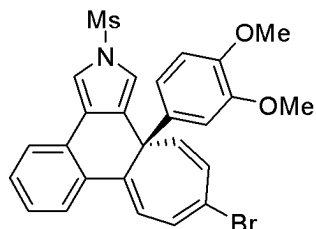

2r

7.668  
7.648  
7.617  
7.599  
7.423  
7.302  
7.283  
7.259  
6.931  
6.911  
6.719  
6.680  
6.660  
6.612  
6.587  
6.565

4.991  
4.969

3.786  
3.771

3.111

0.000

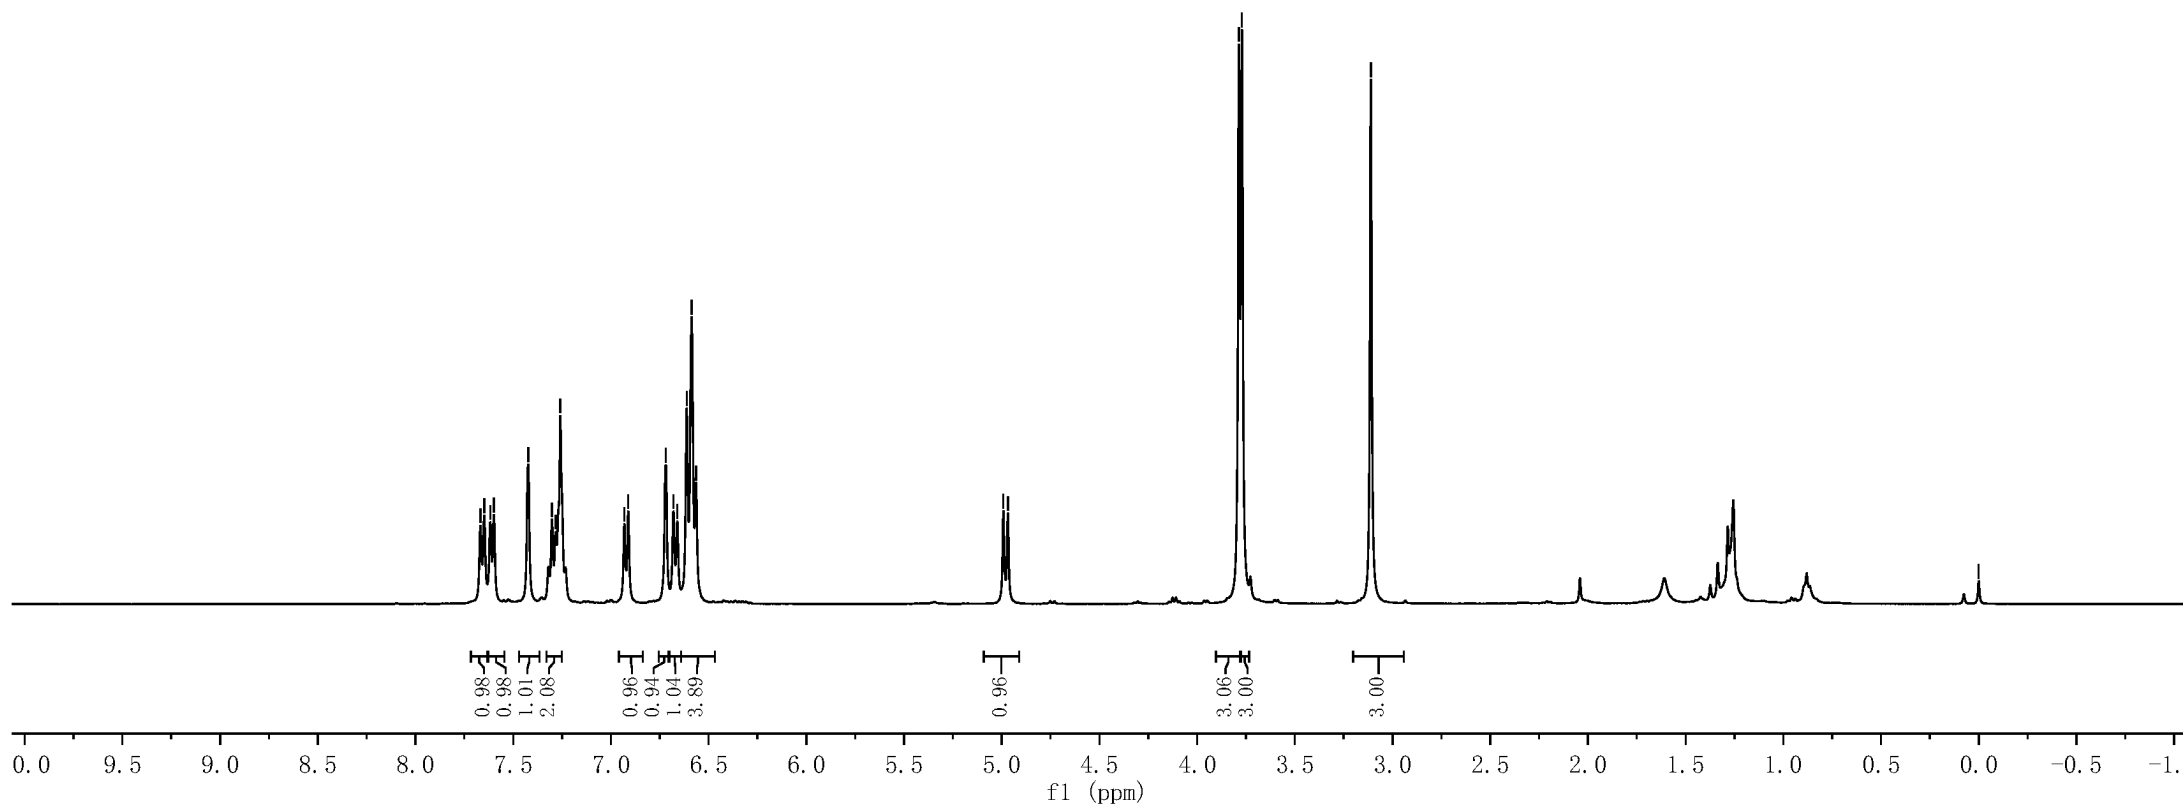

| Parameter                | Value               |
|--------------------------|---------------------|
| 1 Title                  | zyx-5-31--c         |
| 2 Origin                 | Bruker BioSpin GmbH |
| 3 Solvent                | CDCl3               |
| 4 Temperature            | 295.5               |
| 5 Number of Scans        | 61                  |
| 6 Acquisition Time       | 1.3631              |
| 7 Acquisition Date       | 2022-05-05T16:05:28 |
| 8 Spectrometer Frequency | 100.56              |
| 9 Spectral Width         | 24038.5             |

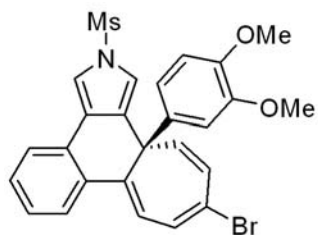

2r

147.55  
147.08  
136.40  
132.39  
132.23  
131.31  
128.26  
127.69  
127.55  
127.11  
123.49  
122.83  
121.57  
121.40  
119.44  
118.93  
116.25  
114.09  
113.24  
110.36  
110.09

77.32  
77.00  
76.68

55.89  
55.62

44.39  
42.80

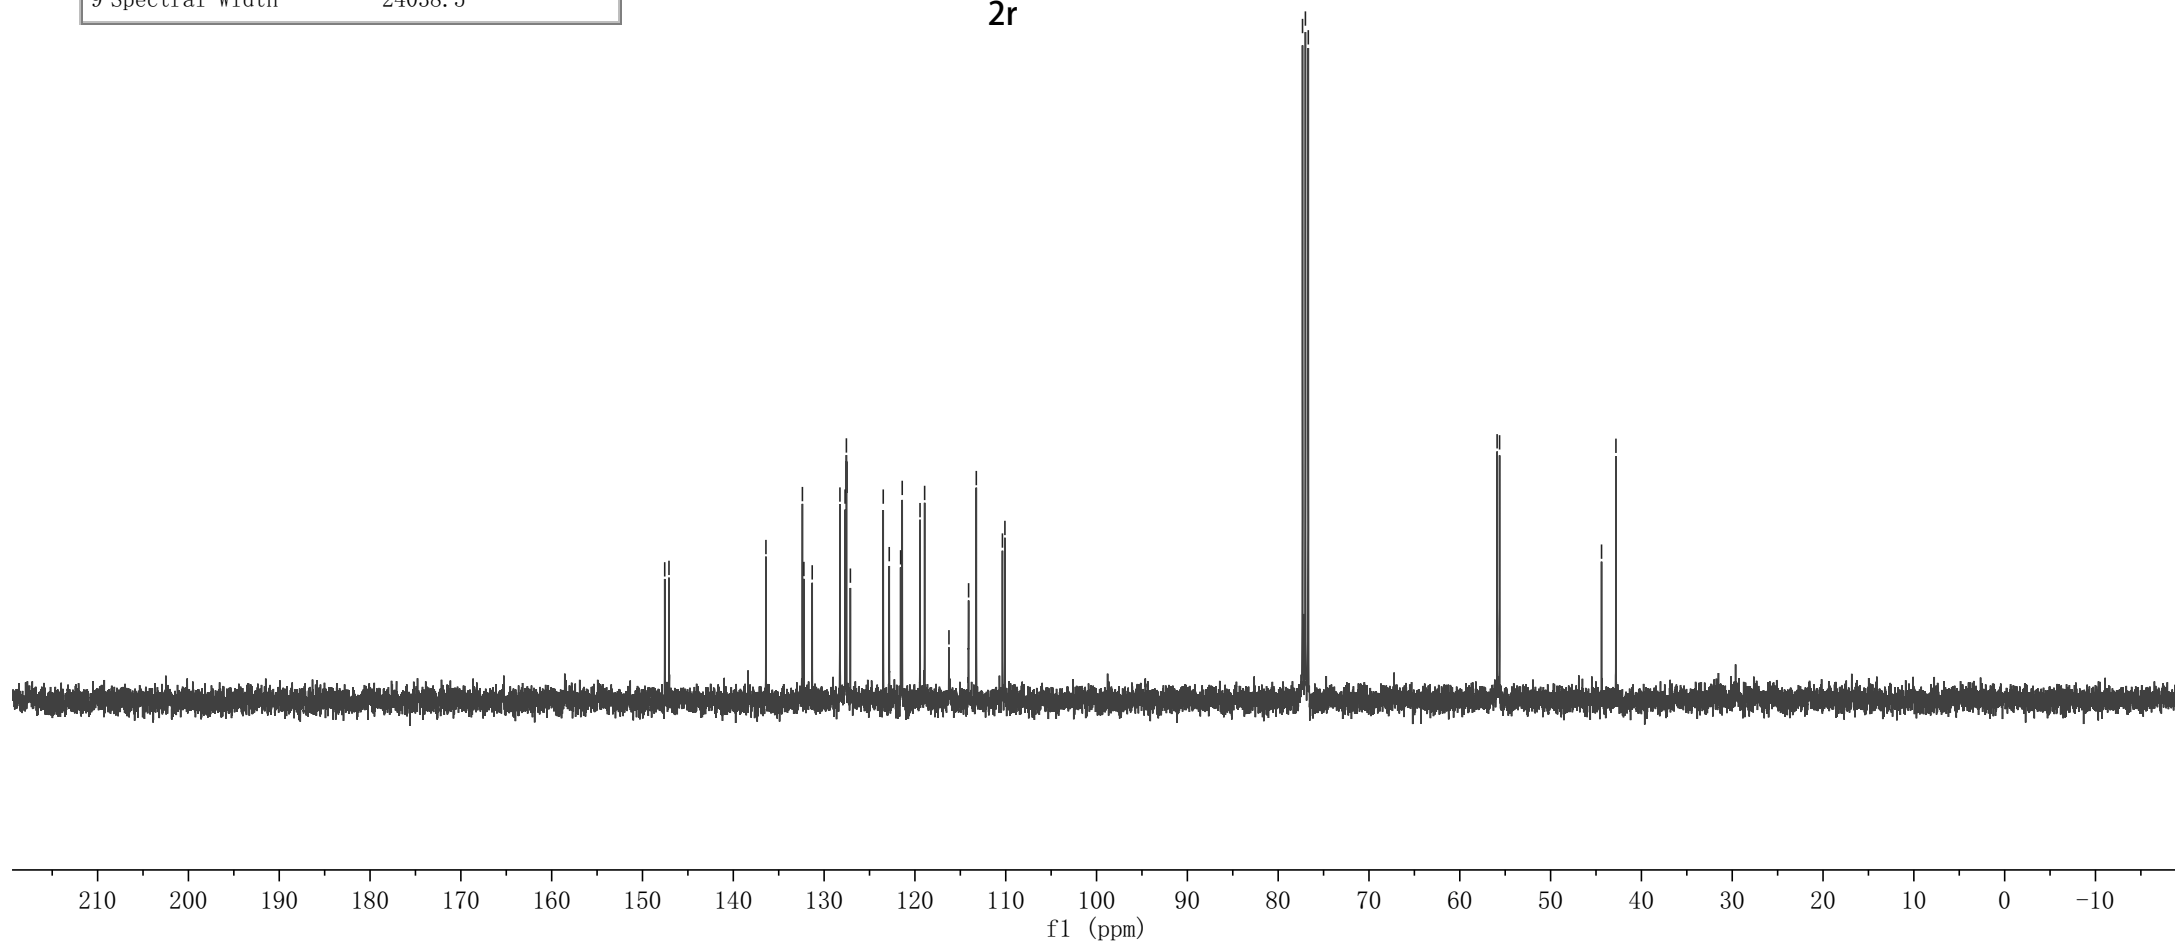

| Parameter                | Value               |
|--------------------------|---------------------|
| 1 Title                  | zyx-5-23-H          |
| 2 Origin                 | Bruker BioSpin GmbH |
| 3 Solvent                | CDCl3               |
| 4 Temperature            | 295.6               |
| 5 Number of Scans        | 13                  |
| 6 Acquisition Time       | 3.9846              |
| 7 Acquisition Date       | 2022-04-30T11:17:46 |
| 8 Spectrometer Frequency | 399.93              |
| 9 Spectral Width         | 8223.7              |

7.675  
7.655  
7.604  
7.586  
7.433  
7.428  
7.314  
7.297  
7.247  
6.989  
6.969  
6.926  
6.921  
6.913  
6.862  
6.842  
6.692  
6.680  
6.670  
6.640  
6.631  
6.541  
6.518

5.221  
5.198

3.120

0.000

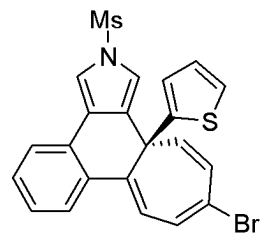

2s

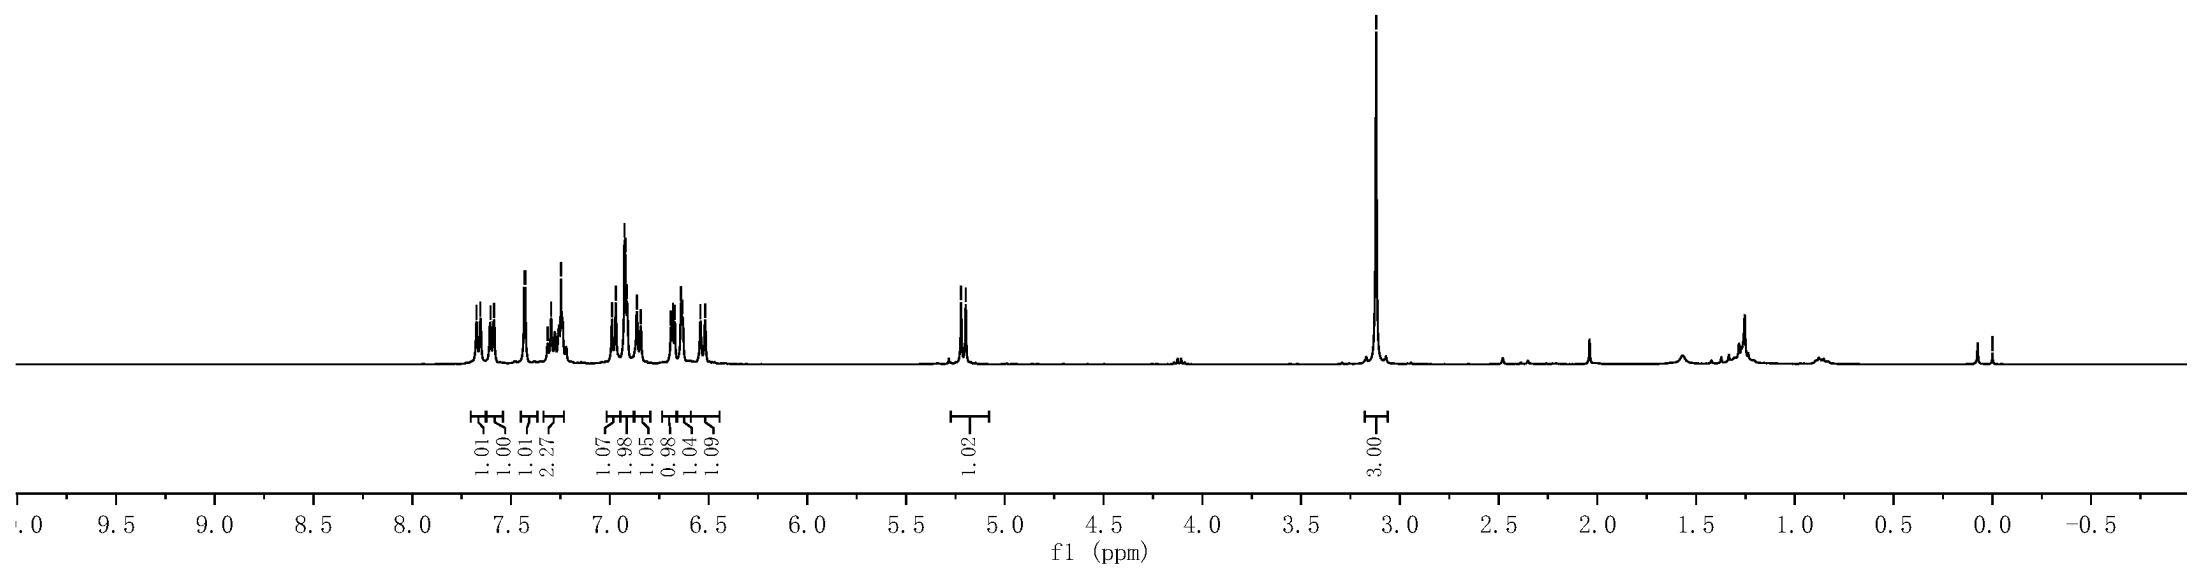

| Parameter                | Value               |
|--------------------------|---------------------|
| 1 Title                  | zyx-5-23-C          |
| 2 Origin                 | Bruker BioSpin GmbH |
| 3 Solvent                | CDCl3               |
| 4 Temperature            | 295.9               |
| 5 Number of Scans        | 60                  |
| 6 Acquisition Time       | 1.3631              |
| 7 Acquisition Date       | 2022-04-30T11:19:50 |
| 8 Spectrometer Frequency | 100.56              |
| 9 Spectral Width         | 24038.5             |

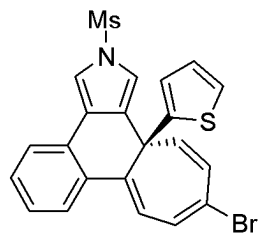

2s

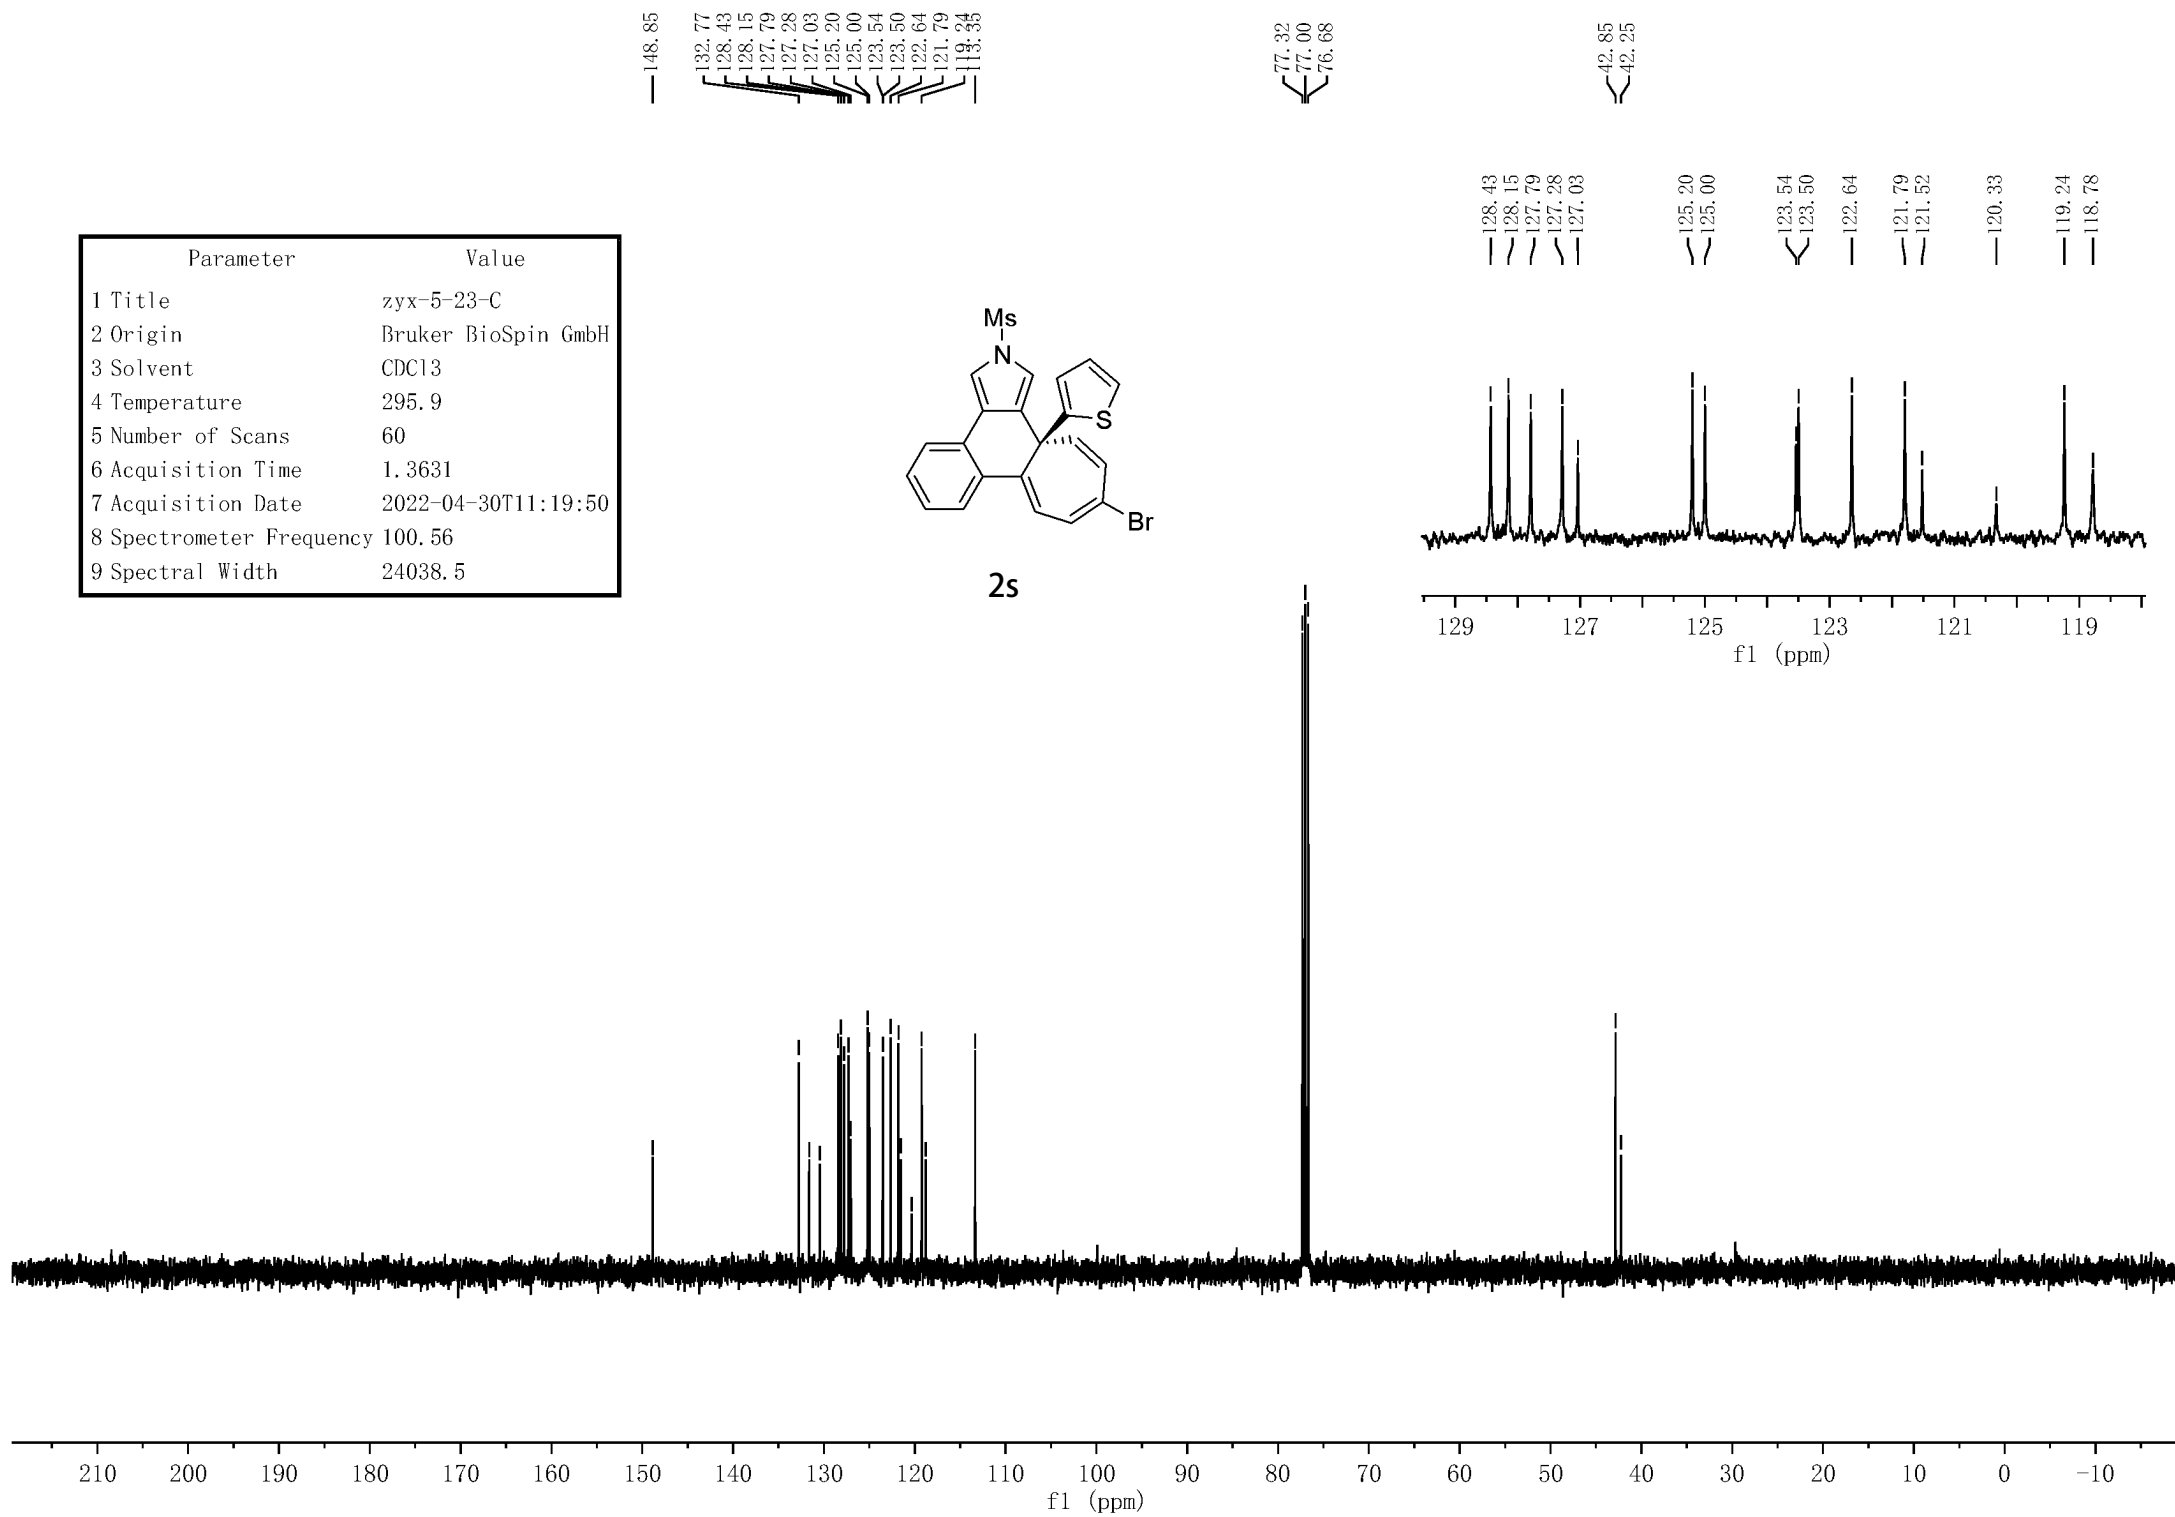

| Parameter                | Value               |
|--------------------------|---------------------|
| 1 Title                  | zyx-5-79-h          |
| 2 Origin                 | Bruker BioSpin GmbH |
| 3 Solvent                | CDCl3               |
| 4 Temperature            | 295.2               |
| 5 Number of Scans        | 10                  |
| 6 Acquisition Time       | 3.9846              |
| 7 Acquisition Date       | 2022-05-27T15:22:01 |
| 8 Spectrometer Frequency | 399.93              |
| 9 Spectral Width         | 8223.7              |

7.570  
7.555  
7.548  
7.534  
7.346  
7.340  
7.320  
7.313  
7.292  
7.285  
7.021  
6.995  
6.973  
6.902  
6.880  
6.774  
6.753  
6.716  
6.711  
6.609  
6.606  
6.588  
6.585  
6.558  
6.535  
6.464  
6.442

4.729  
4.707

3.097  
2.861

0.000

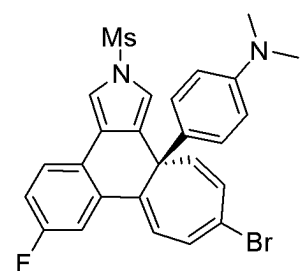

2t

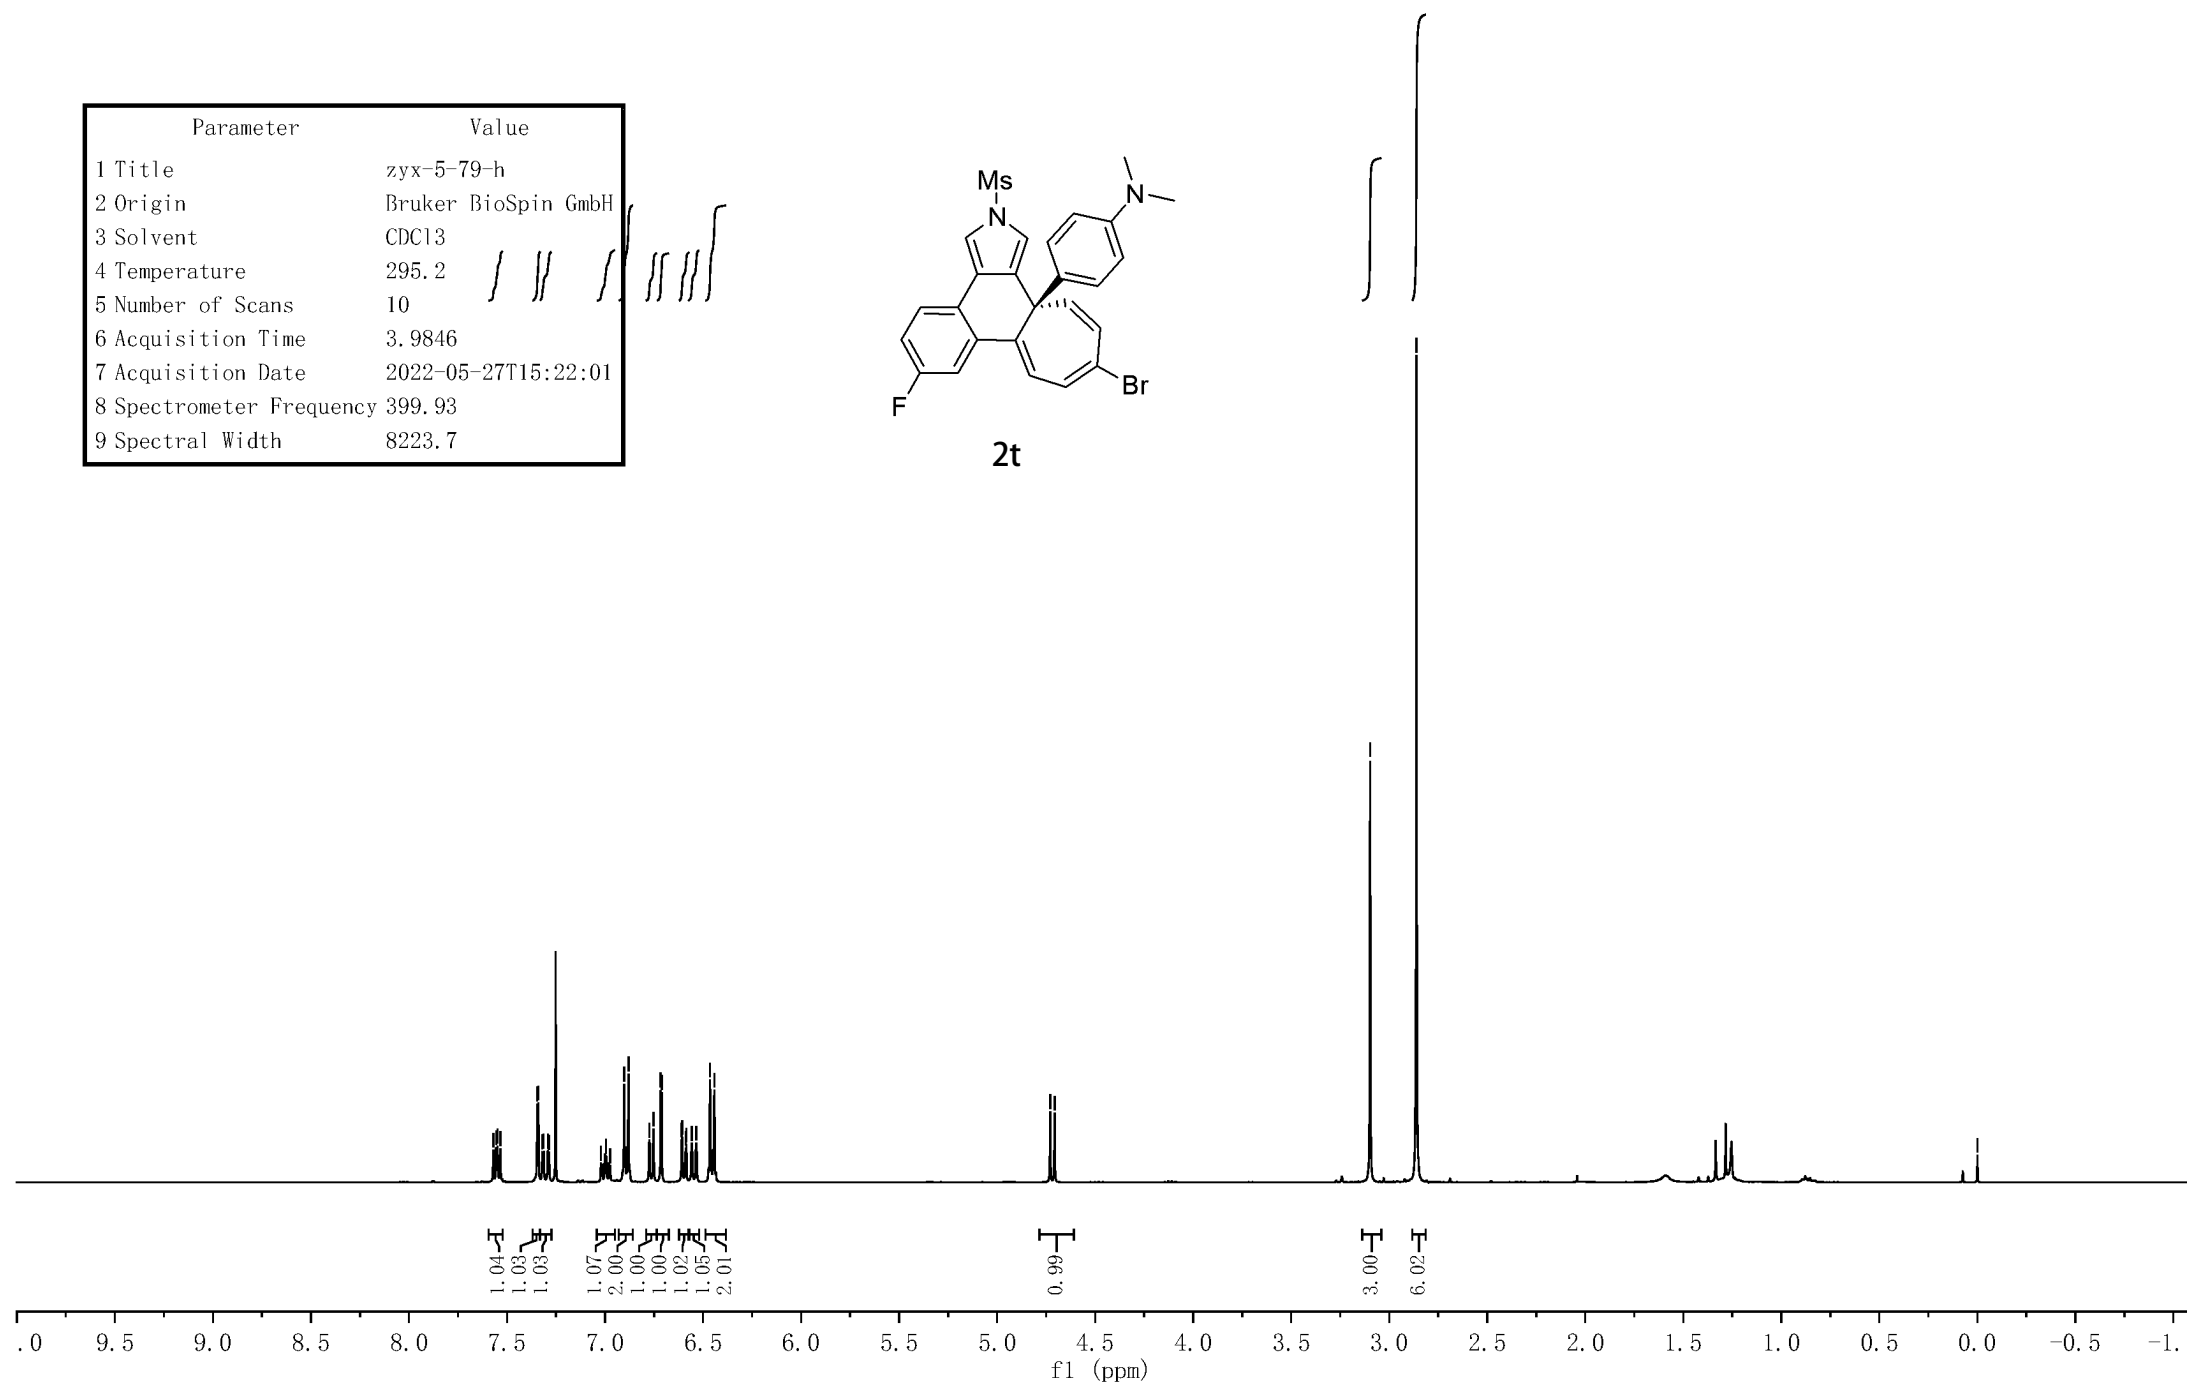

| Parameter                | Value               |
|--------------------------|---------------------|
| 1 Title                  | zyx-5-79-CC         |
| 2 Origin                 | Bruker BioSpin GmbH |
| 3 Solvent                | CDCl3               |
| 4 Temperature            | 295.5               |
| 5 Number of Scans        | 147                 |
| 6 Acquisition Time       | 1.3631              |
| 7 Acquisition Date       | 2022-05-27T15:26:08 |
| 8 Spectrometer Frequency | 100.56              |
| 9 Spectral Width         | 24038.5             |

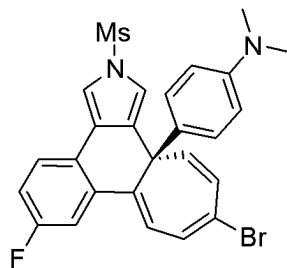

2t

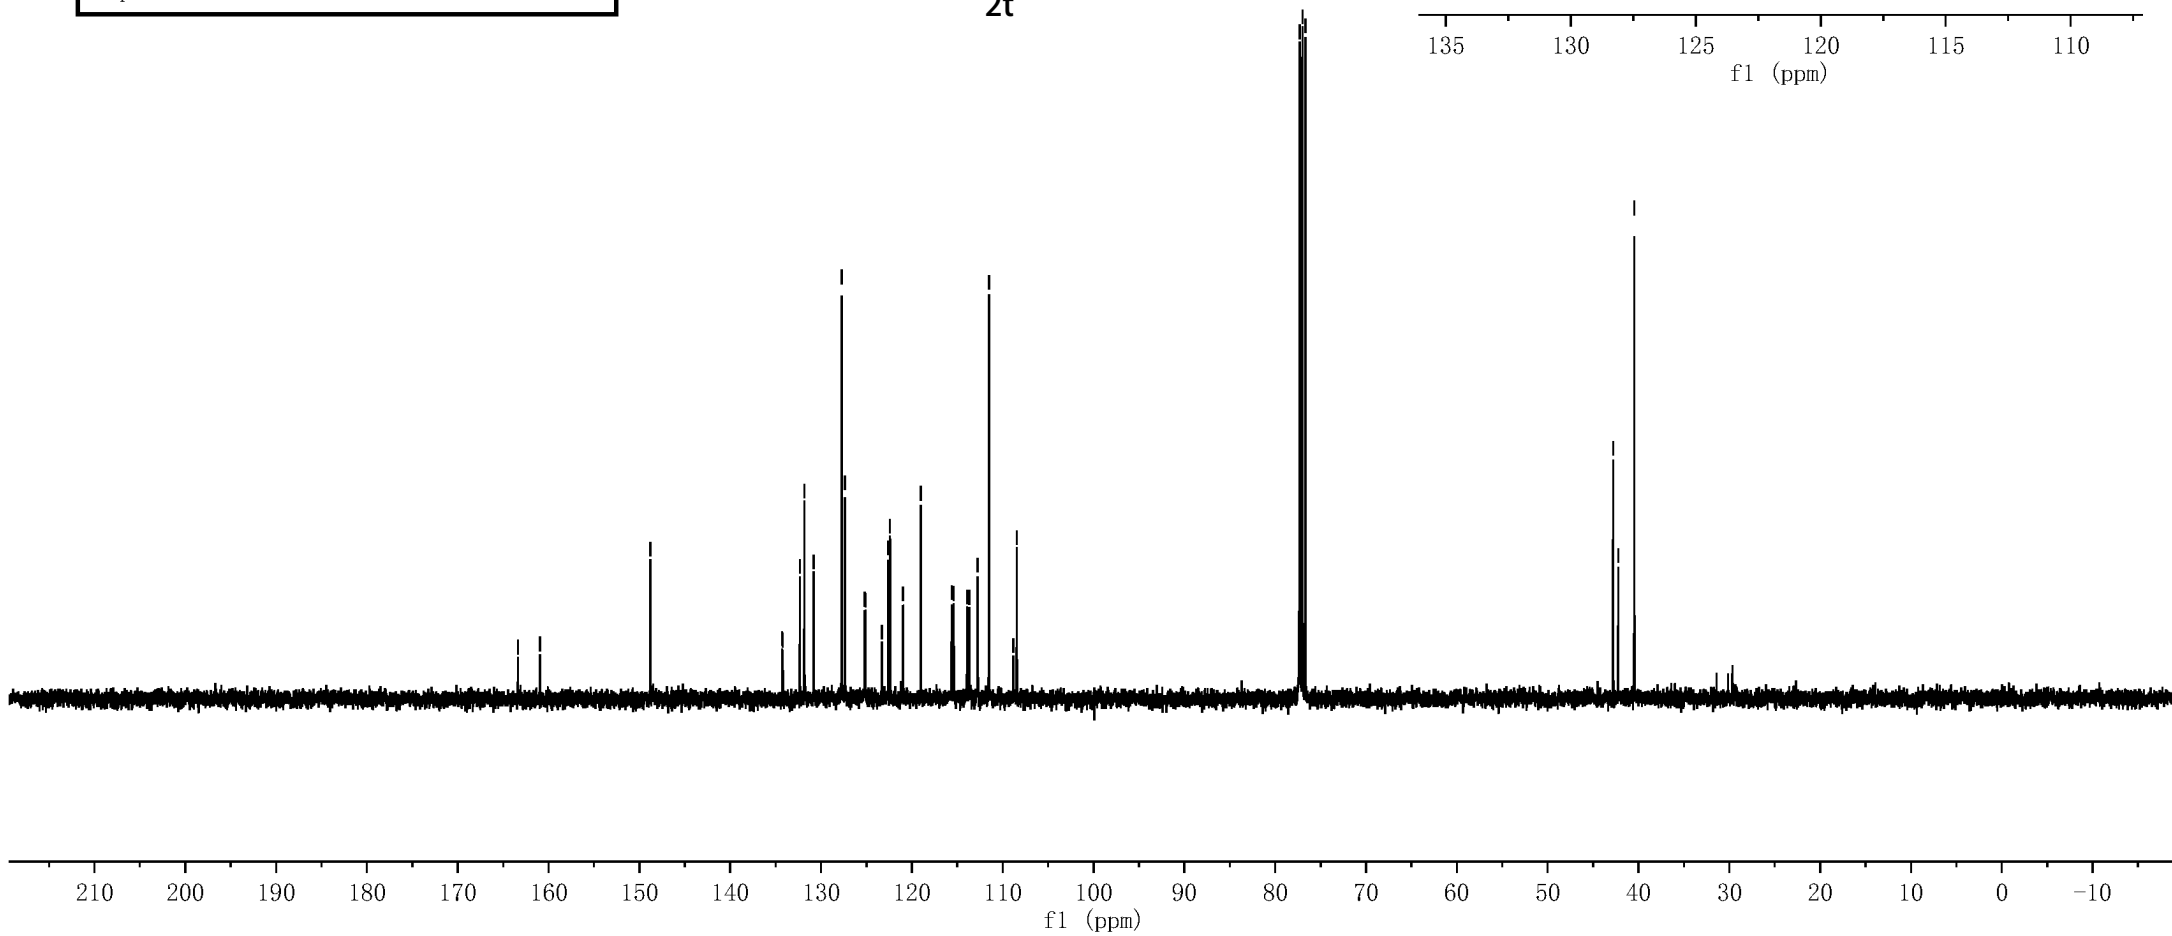

163.37  
160.93

148.80  
134.28  
134.21  
132.34  
131.84  
130.82  
127.72  
127.36  
125.18  
125.10  
123.32  
122.61  
122.41  
120.99  
119.01  
115.62  
115.39  
113.92  
113.69  
112.75  
111.51  
108.82  
108.45

77.32  
77.00  
76.68

42.79  
42.23  
40.46

134.28  
134.21  
132.34  
131.84  
130.82  
127.72  
127.36  
125.18  
125.10  
123.32  
122.61  
122.41  
120.99  
119.01  
115.62  
115.39  
113.92  
113.69  
112.75  
111.51  
108.82  
108.45

135  
130  
125  
120  
115  
110  
f1 (ppm)

| Parameter                | Value               |
|--------------------------|---------------------|
| 1 Title                  | ZYX-5-79-F          |
| 2 Origin                 | Bruker BioSpin GmbH |
| 3 Solvent                | CDCl3               |
| 4 Temperature            | 295.6               |
| 5 Number of Scans        | 16                  |
| 6 Acquisition Time       | 0.7340              |
| 7 Acquisition Date       | 2022-05-28T11:01:58 |
| 8 Spectrometer Frequency | 376.31              |
| 9 Spectral Width         | 89285.7             |

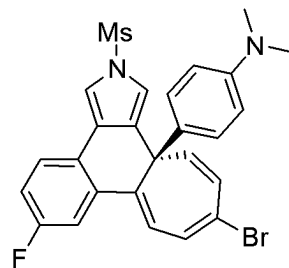

2t

113.55  
113.57  
113.60  
113.62

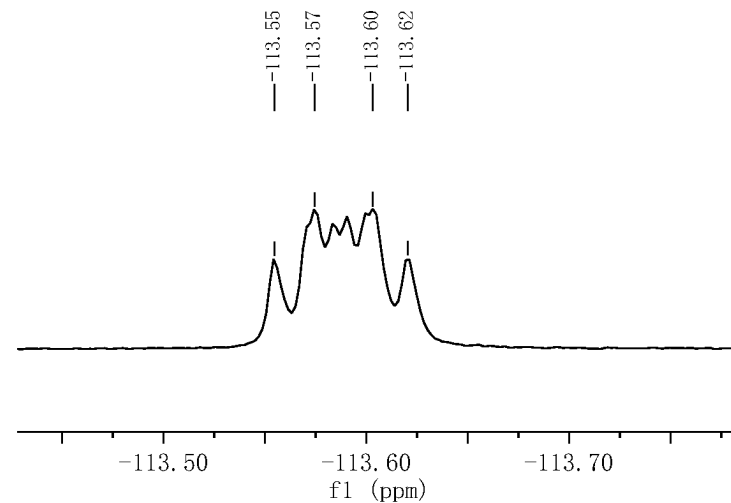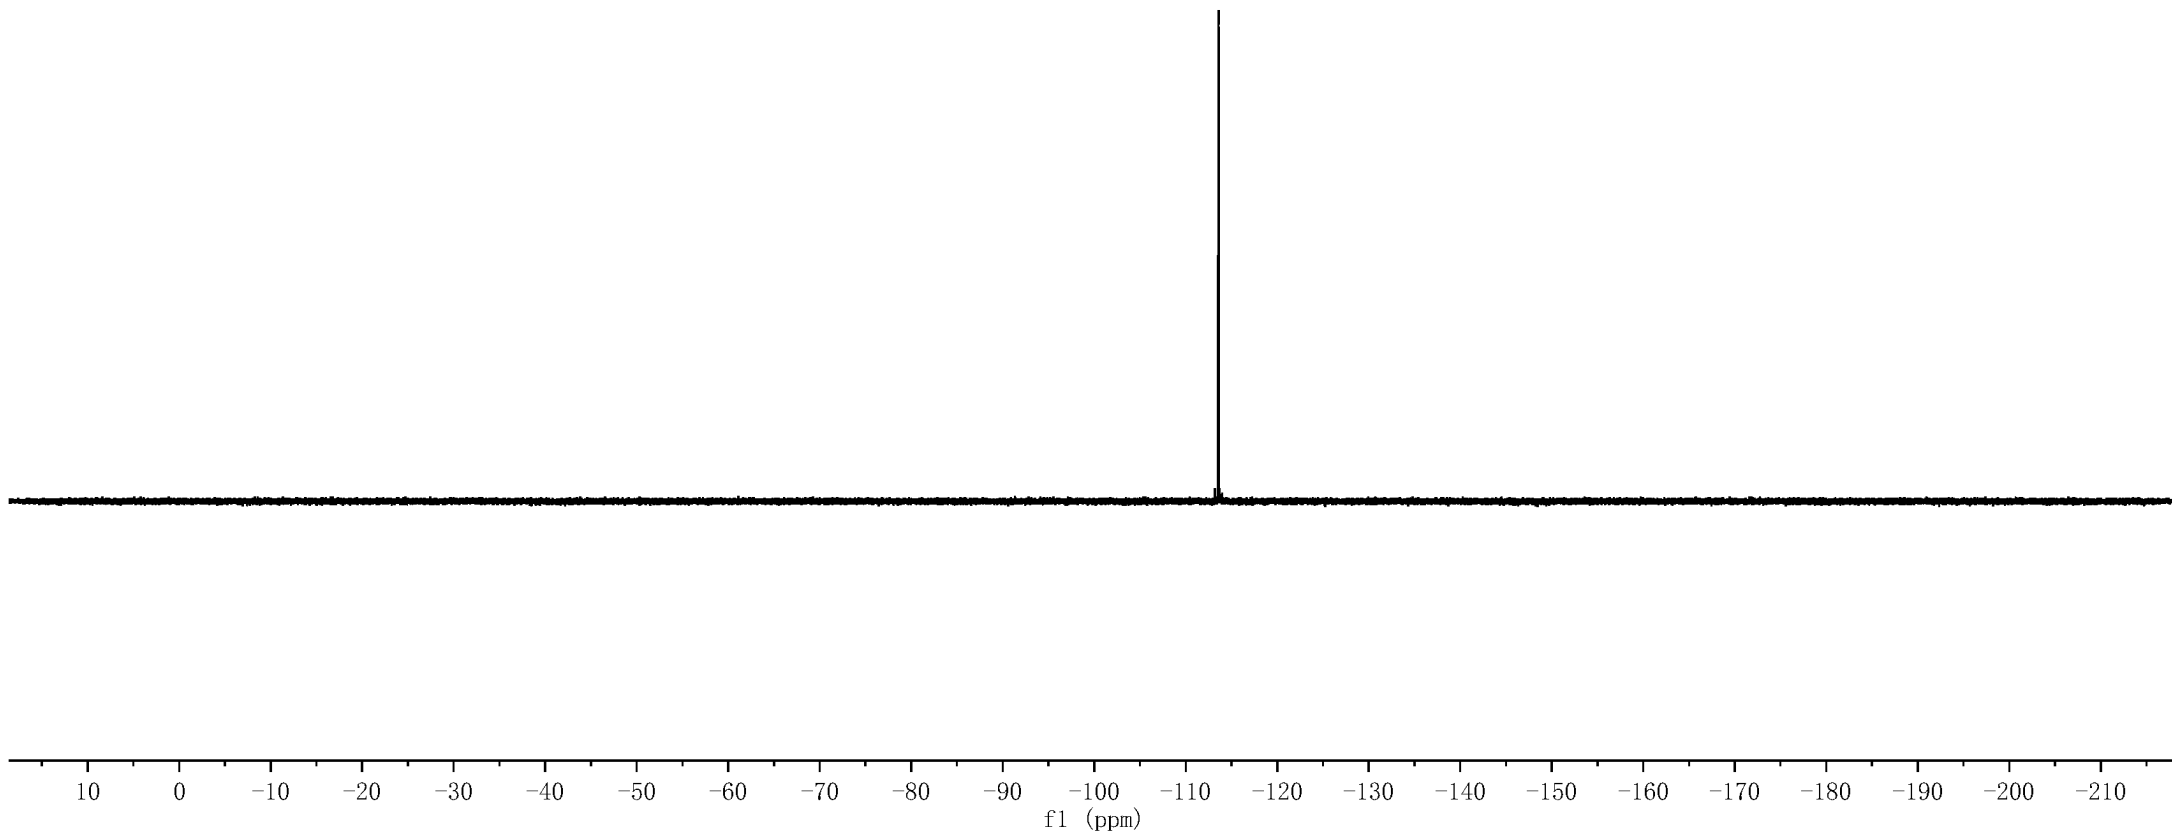

| Parameter                | Value               |
|--------------------------|---------------------|
| 1 Title                  | zyx-5-56-h          |
| 2 Origin                 | Bruker BioSpin GmbH |
| 3 Solvent                | CDCl3               |
| 4 Temperature            | 298.0               |
| 5 Number of Scans        | 5                   |
| 6 Acquisition Time       | 4.0894              |
| 7 Acquisition Date       | 2022-05-19T16:06:40 |
| 8 Spectrometer Frequency | 400.13              |
| 9 Spectral Width         | 8012.8              |

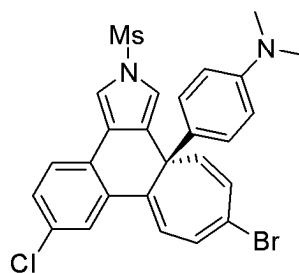

2u

7.578  
7.573  
7.522  
7.501  
7.377  
7.372  
7.246  
7.230  
7.225  
6.899  
6.877  
6.771  
6.750  
6.713  
6.707  
6.588  
6.585  
6.567  
6.565  
6.548  
6.526  
6.469  
6.447

4.616  
4.594

3.103

2.865

-0.000

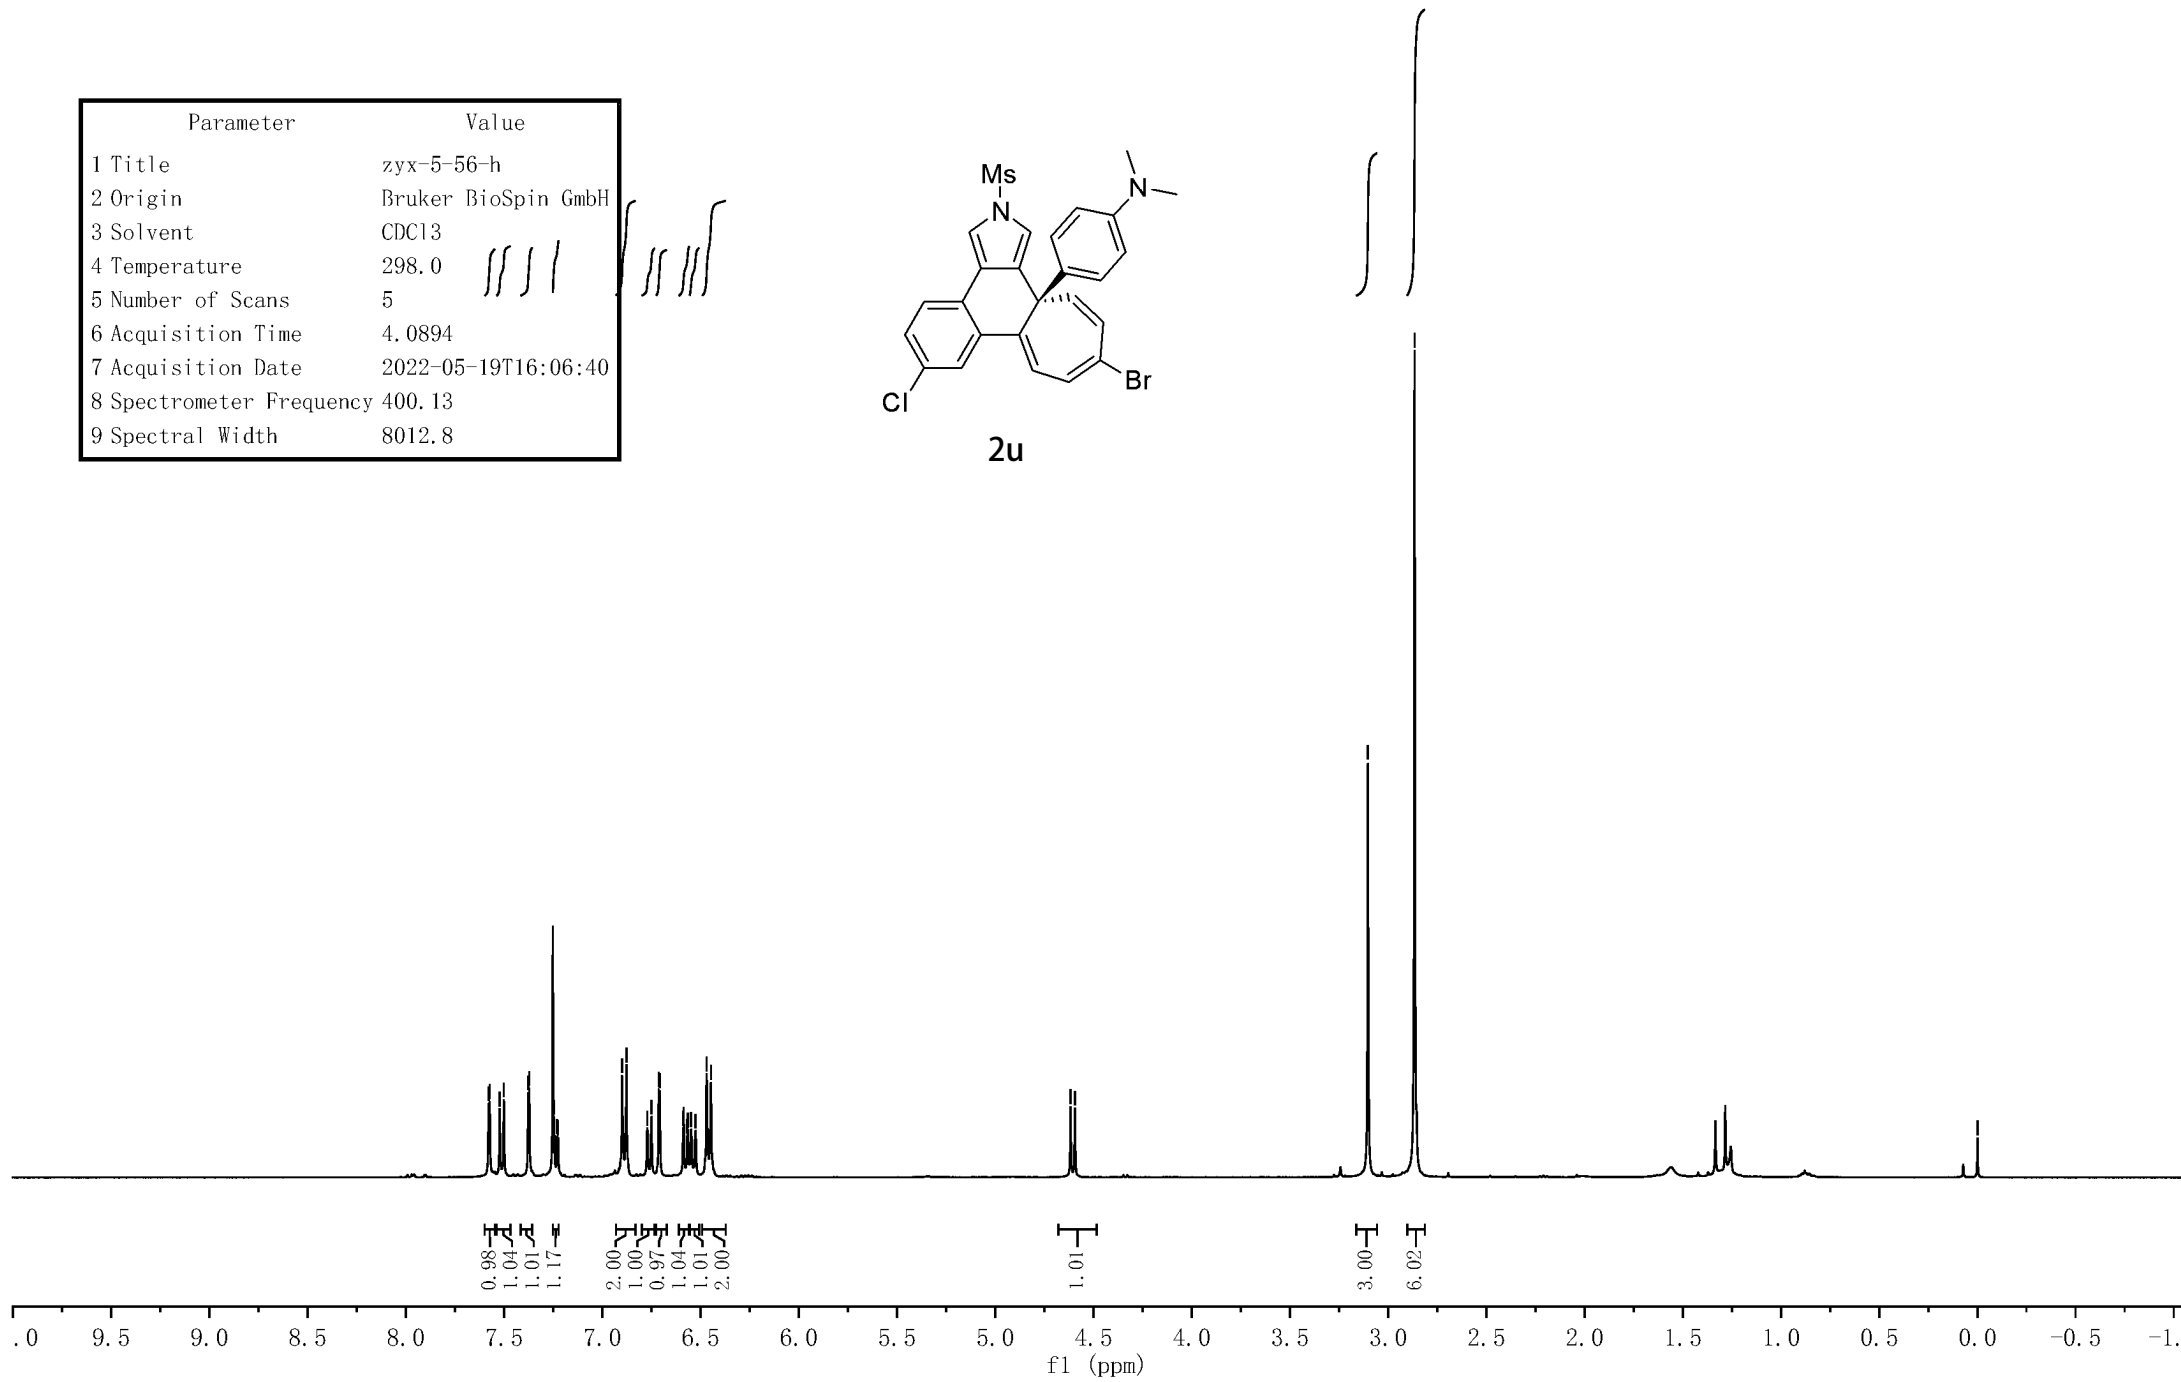



| Parameter                | Value               |
|--------------------------|---------------------|
| 1 Title                  | ZYX-5-56--C         |
| 2 Origin                 | Bruker BioSpin GmbH |
| 3 Solvent                | CDCl3               |
| 4 Temperature            | 297.6               |
| 5 Number of Scans        | 406                 |
| 6 Acquisition Time       | 1.3631              |
| 7 Acquisition Date       | 2022-08-30T10:02:33 |
| 8 Spectrometer Frequency | 100.56              |
| 9 Spectral Width         | 24038.5             |

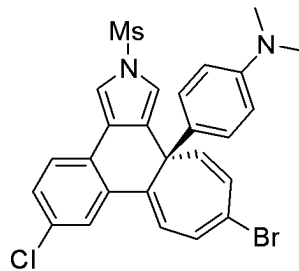

2u

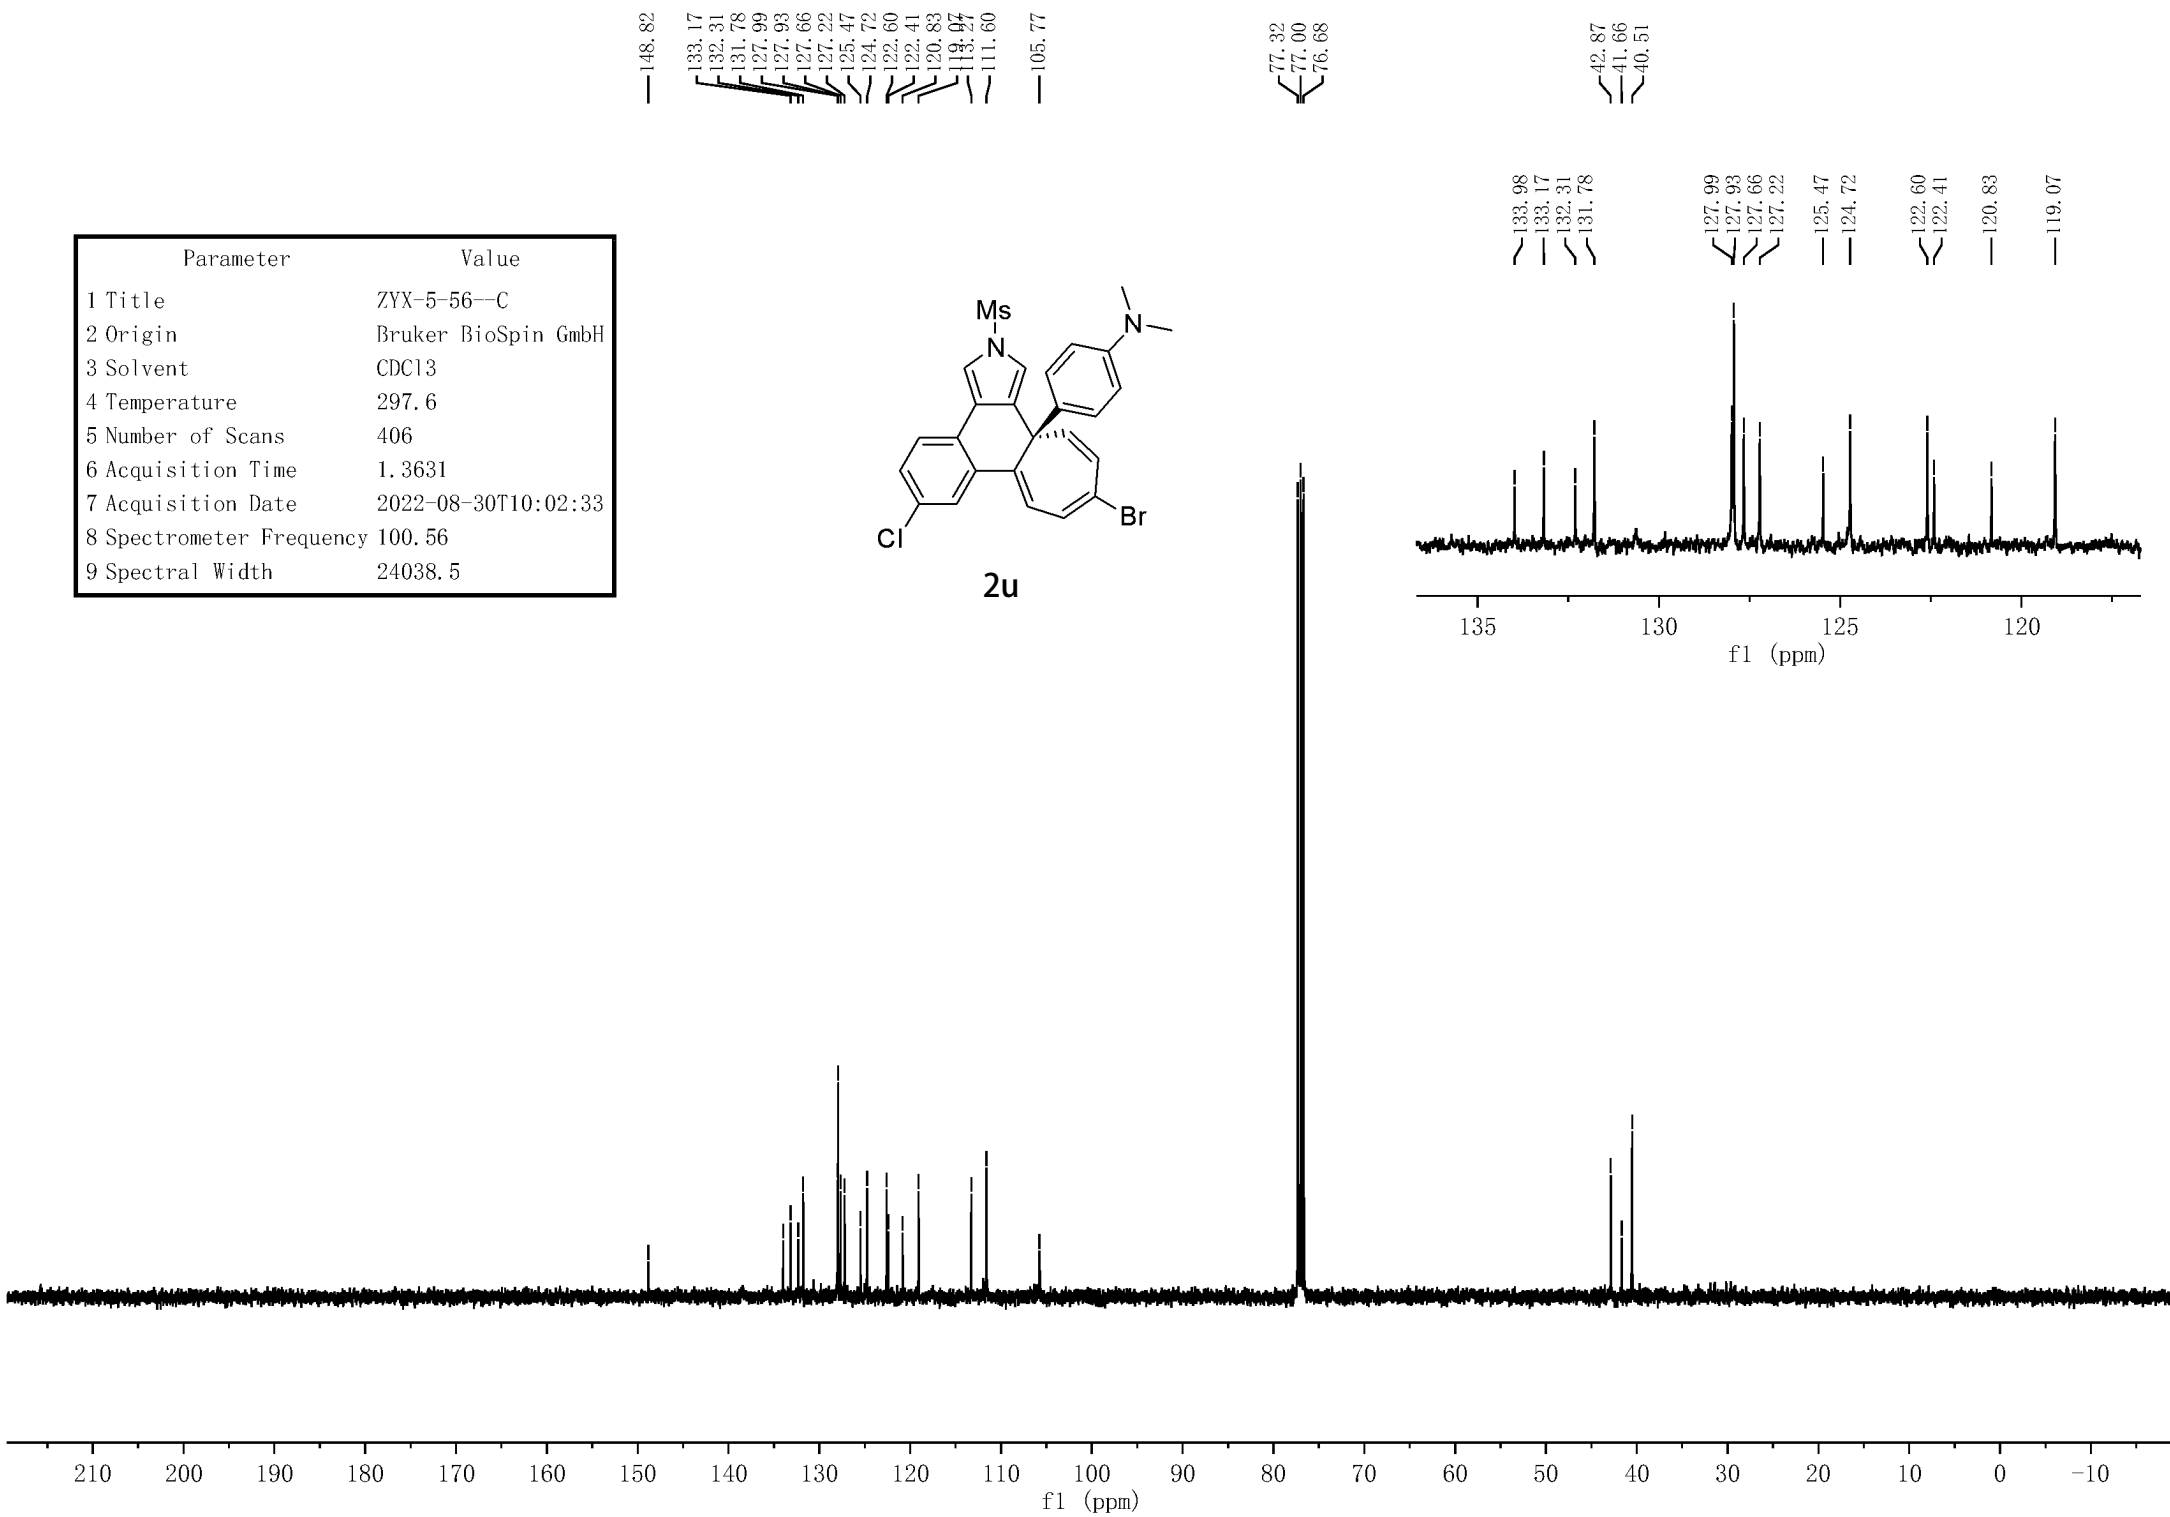

| Parameter                | Value               |
|--------------------------|---------------------|
| 1 Title                  | ZYX-5-64-H          |
| 2 Origin                 | Bruker BioSpin GmbH |
| 3 Solvent                | CDCl3               |
| 4 Temperature            | 297.0               |
| 5 Number of Scans        | 8                   |
| 6 Acquisition Time       | 3.9846              |
| 7 Acquisition Date       | 2022-05-21T10:47:25 |
| 8 Spectrometer Frequency | 399.93              |
| 9 Spectral Width         | 8223.7              |

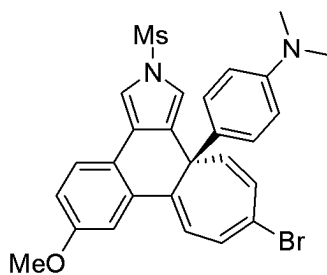

2v

7.528  
7.507  
7.298  
7.293  
7.117  
7.111  
6.914  
6.892  
6.874  
6.868  
6.812  
6.792  
6.691  
6.686  
6.595  
6.592  
6.575  
6.572  
6.551  
6.529  
6.466  
6.444

4.669  
4.646  
3.846  
3.077  
2.860  
0.000

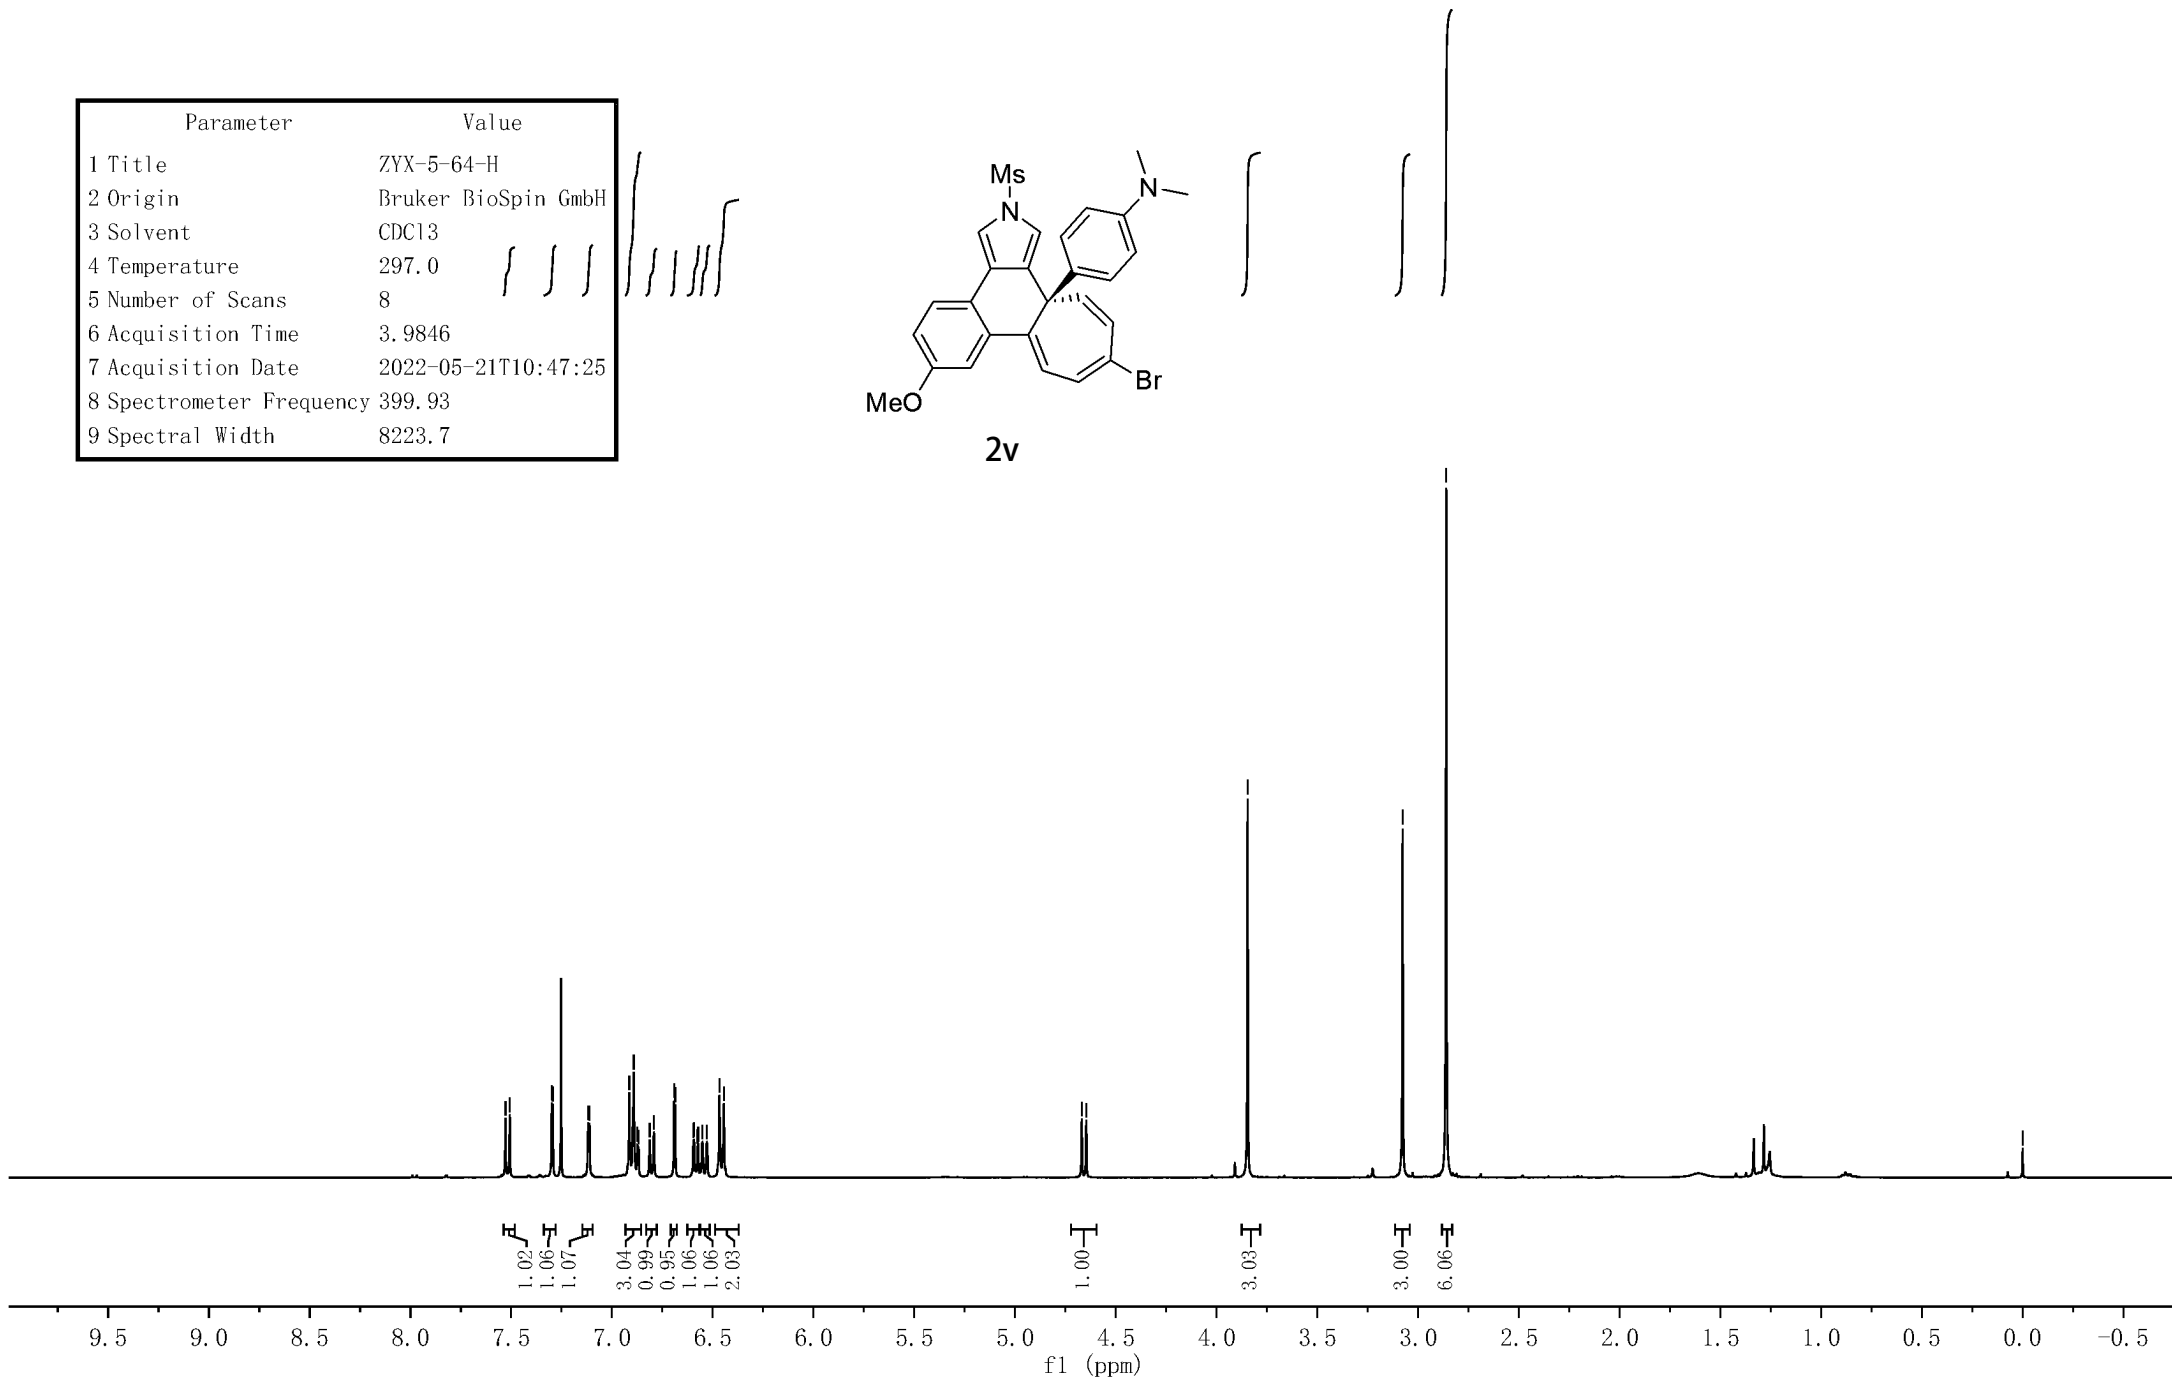

| Parameter                | Value               |
|--------------------------|---------------------|
| 1 Title                  | ZYX-5-64-H          |
| 2 Origin                 | Bruker BioSpin GmbH |
| 3 Solvent                | CDCl3               |
| 4 Temperature            | 297.0               |
| 5 Number of Scans        | 8                   |
| 6 Acquisition Time       | 3.9846              |
| 7 Acquisition Date       | 2022-05-21T10:47:25 |
| 8 Spectrometer Frequency | 399.93              |
| 9 Spectral Width         | 8223.7              |

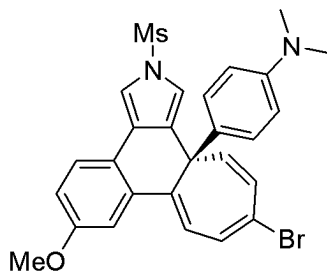

2v

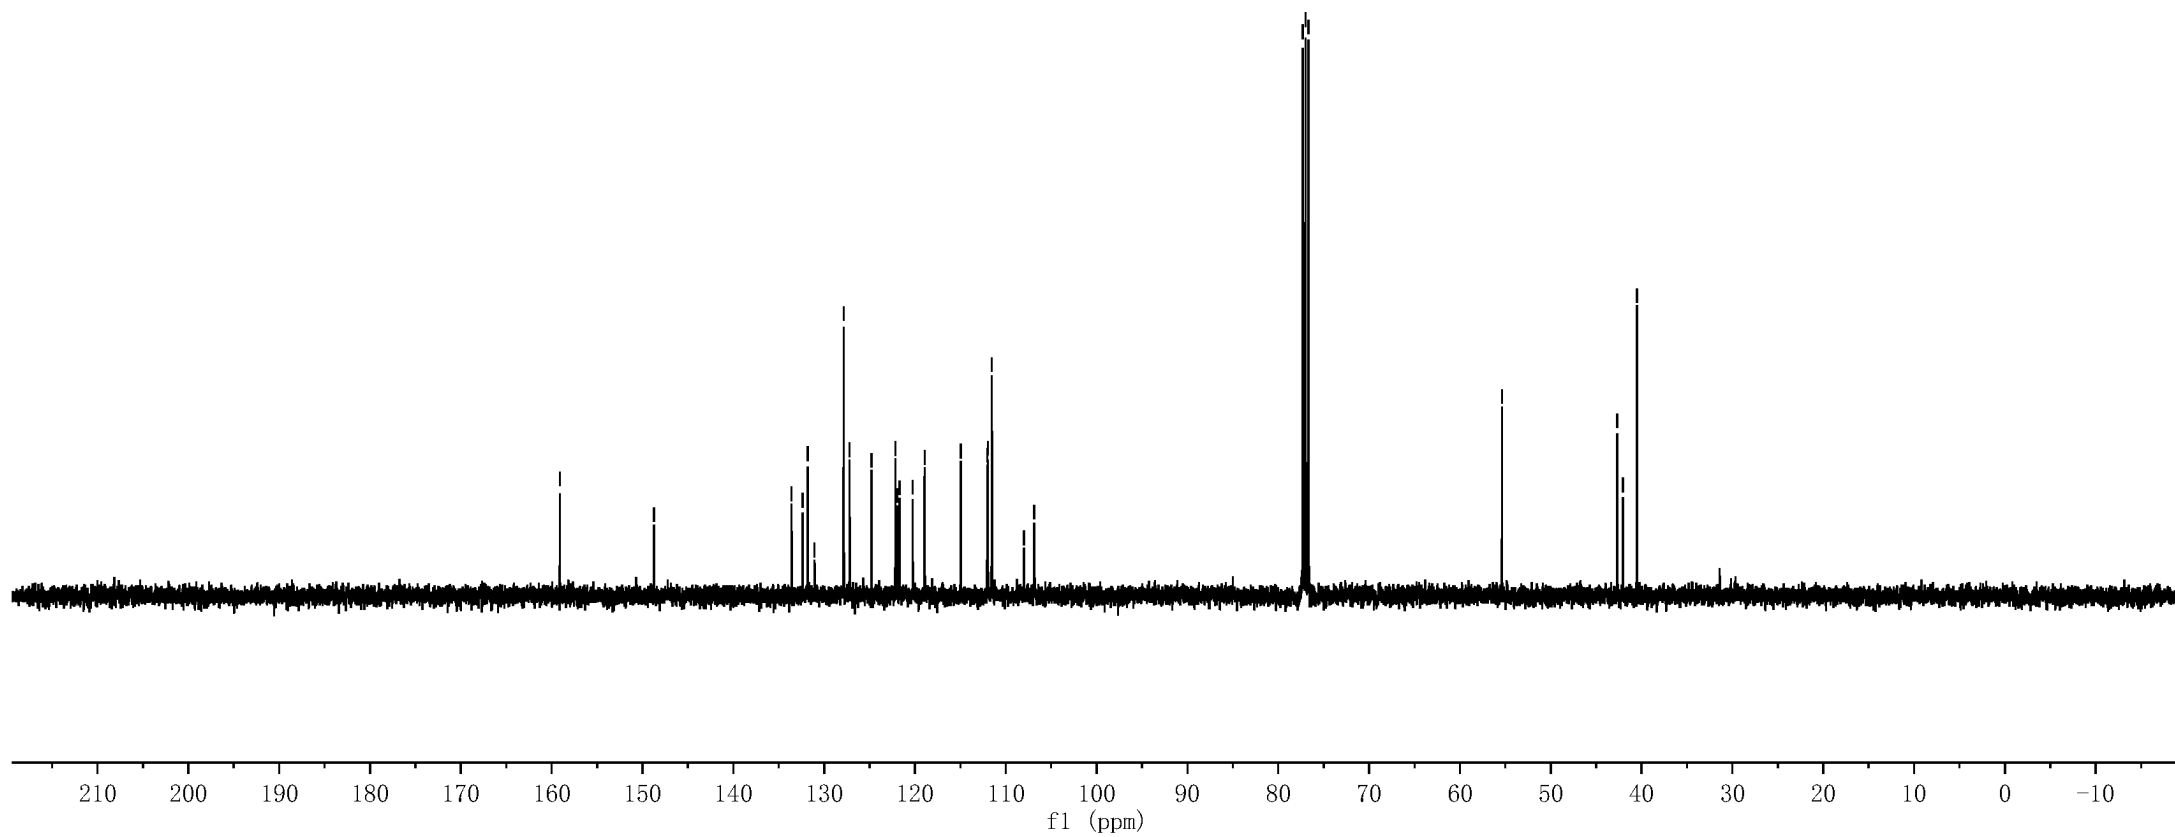

159.10

148.74

133.59

132.37

131.80

131.06

127.85

127.20

124.78

122.15

121.99

121.69

120.25

118.94

114.96

112.04

111.98

111.54

108.01

106.87

77.32

77.00

76.68

55.37

42.68

42.06

40.51

127.85

127.20

124.78

122.15

121.99

121.69

120.25

118.94

114.96

112.04

111.98

111.54

f1 (ppm)

f1 (ppm)

7.562  
7.556  
7.542  
7.394  
7.389  
7.199  
7.193  
7.177  
7.172  
6.895  
6.873  
6.822  
6.802  
6.730  
6.724  
6.624  
6.621  
6.604  
6.601  
6.558  
6.536  
6.458  
6.436

4.815  
4.792

3.111  
2.859

0.000

| Parameter                | Value               |
|--------------------------|---------------------|
| 1 Title                  | zyx-5-81--h         |
| 2 Origin                 | Bruker BioSpin GmbH |
| 3 Solvent                | CDCl3               |
| 4 Temperature            | 295.1               |
| 5 Number of Scans        | 11                  |
| 6 Acquisition Time       | 3.9846              |
| 7 Acquisition Date       | 2022-05-27T15:17:21 |
| 8 Spectrometer Frequency | 399.93              |
| 9 Spectral Width         | 8223.7              |

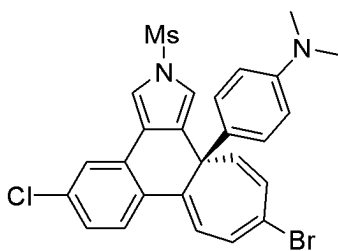

2w

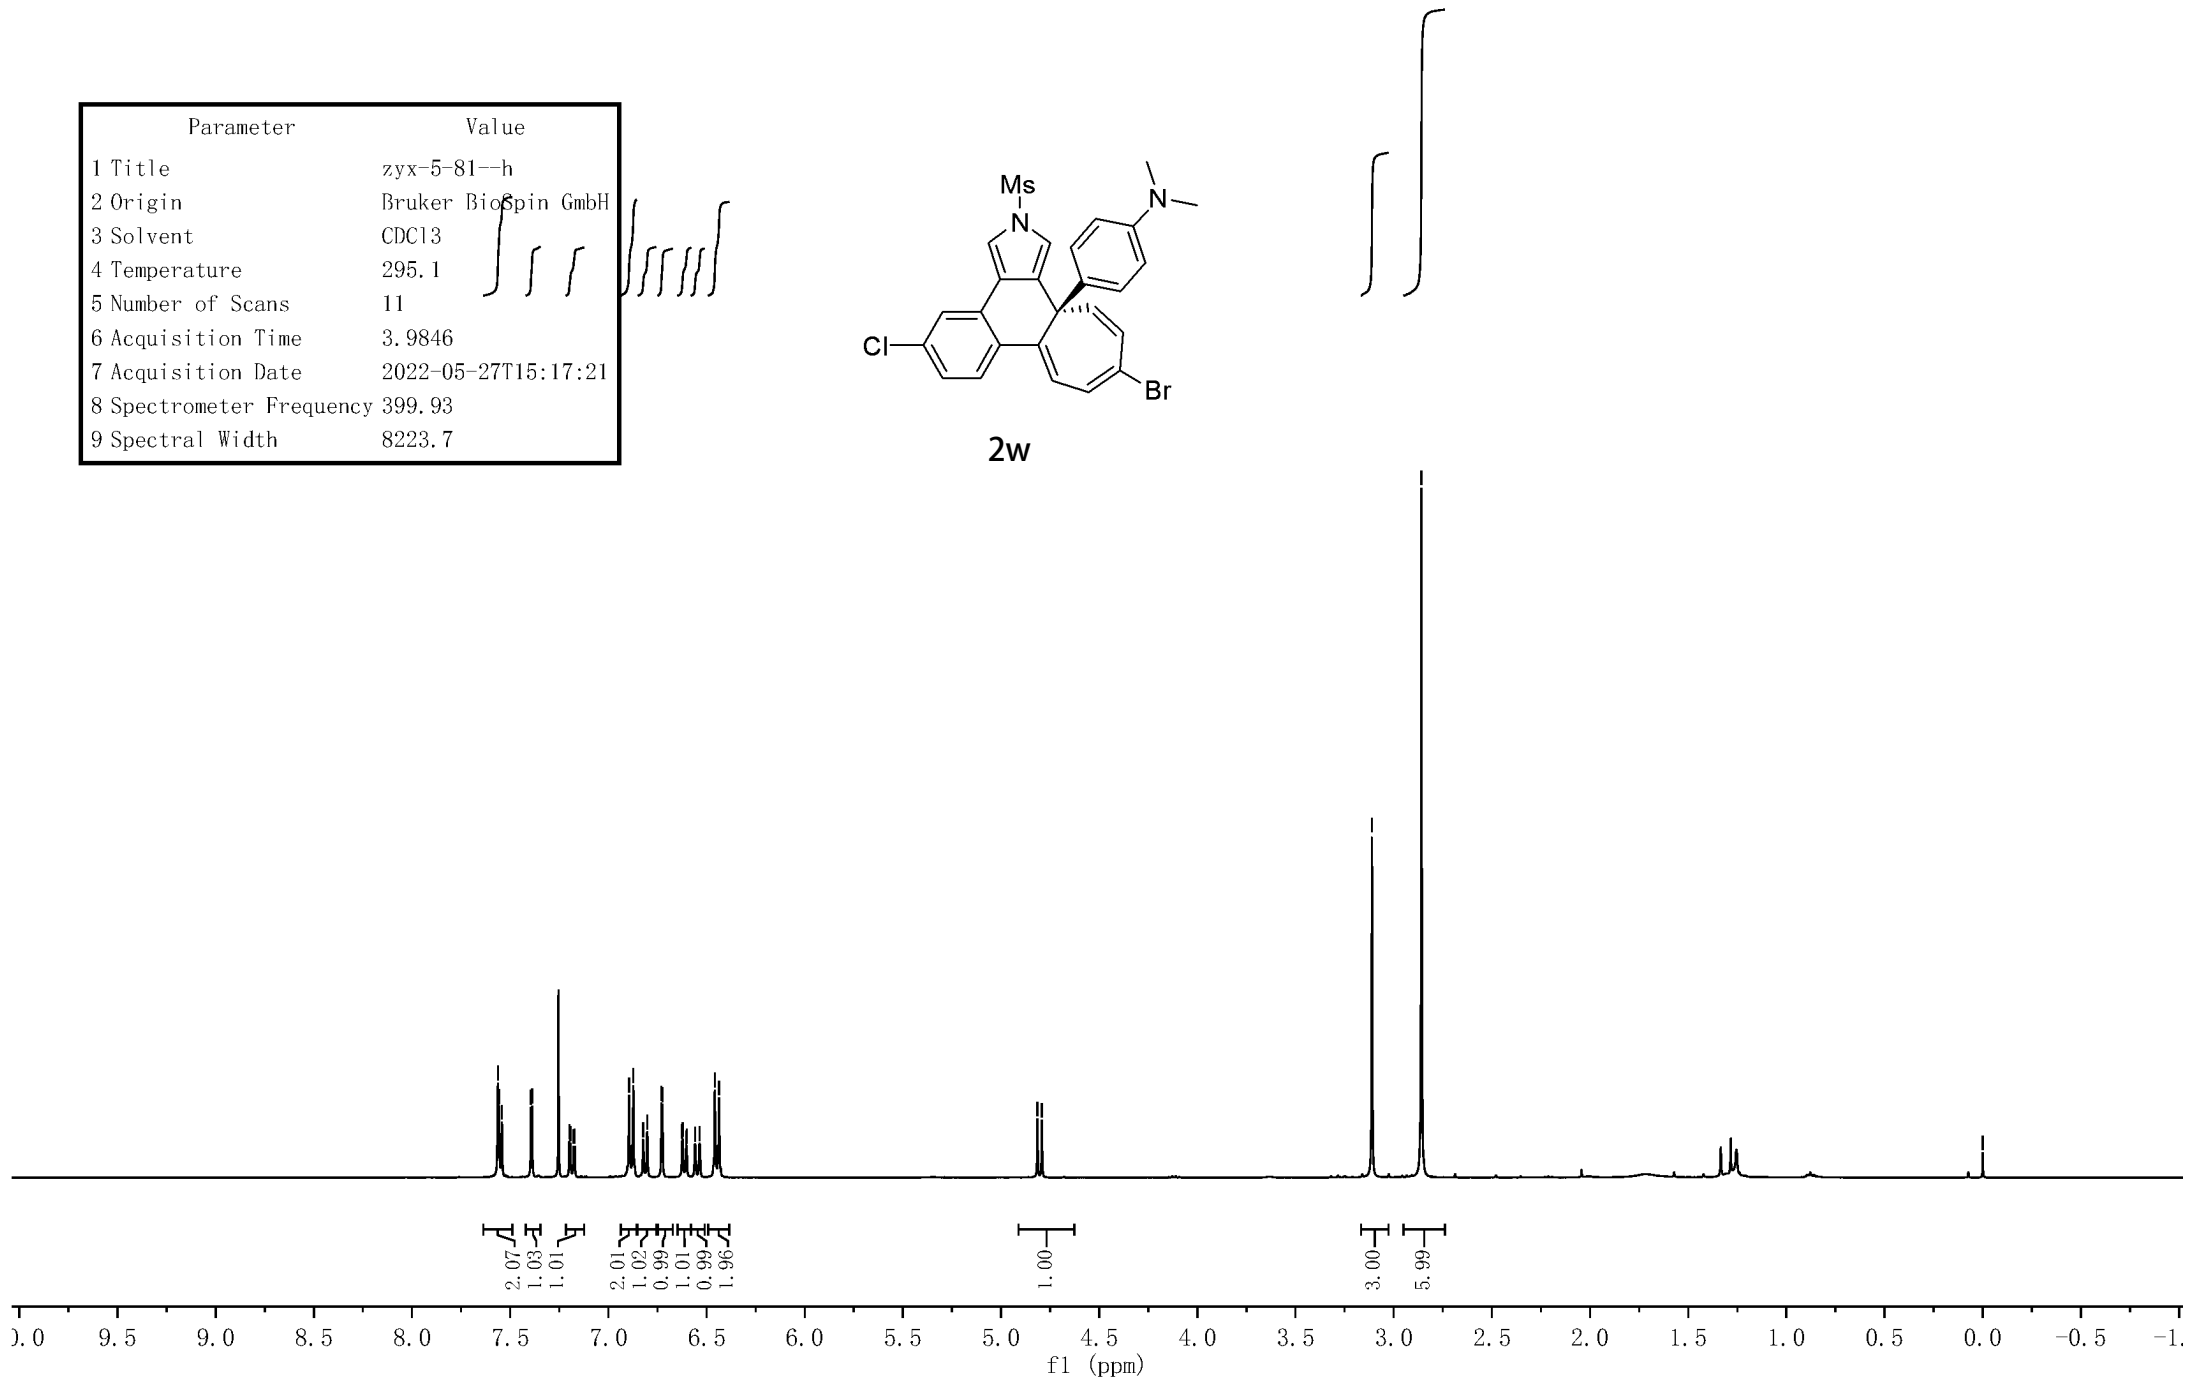

| Parameter                | Value               |
|--------------------------|---------------------|
| 1 Title                  | zyx-5-81-c          |
| 2 Origin                 | Bruker BioSpin GmbH |
| 3 Solvent                | CDC13               |
| 4 Temperature            | 297.7               |
| 5 Number of Scans        | 70                  |
| 6 Acquisition Time       | 1.1010              |
| 7 Acquisition Date       | 2022-05-26T21:46:49 |
| 8 Spectrometer Frequency | 125.77              |
| 9 Spectral Width         | 29761.9             |

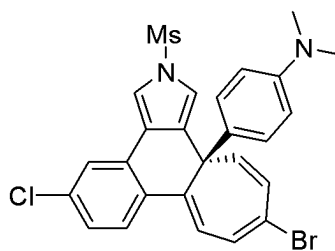

2w

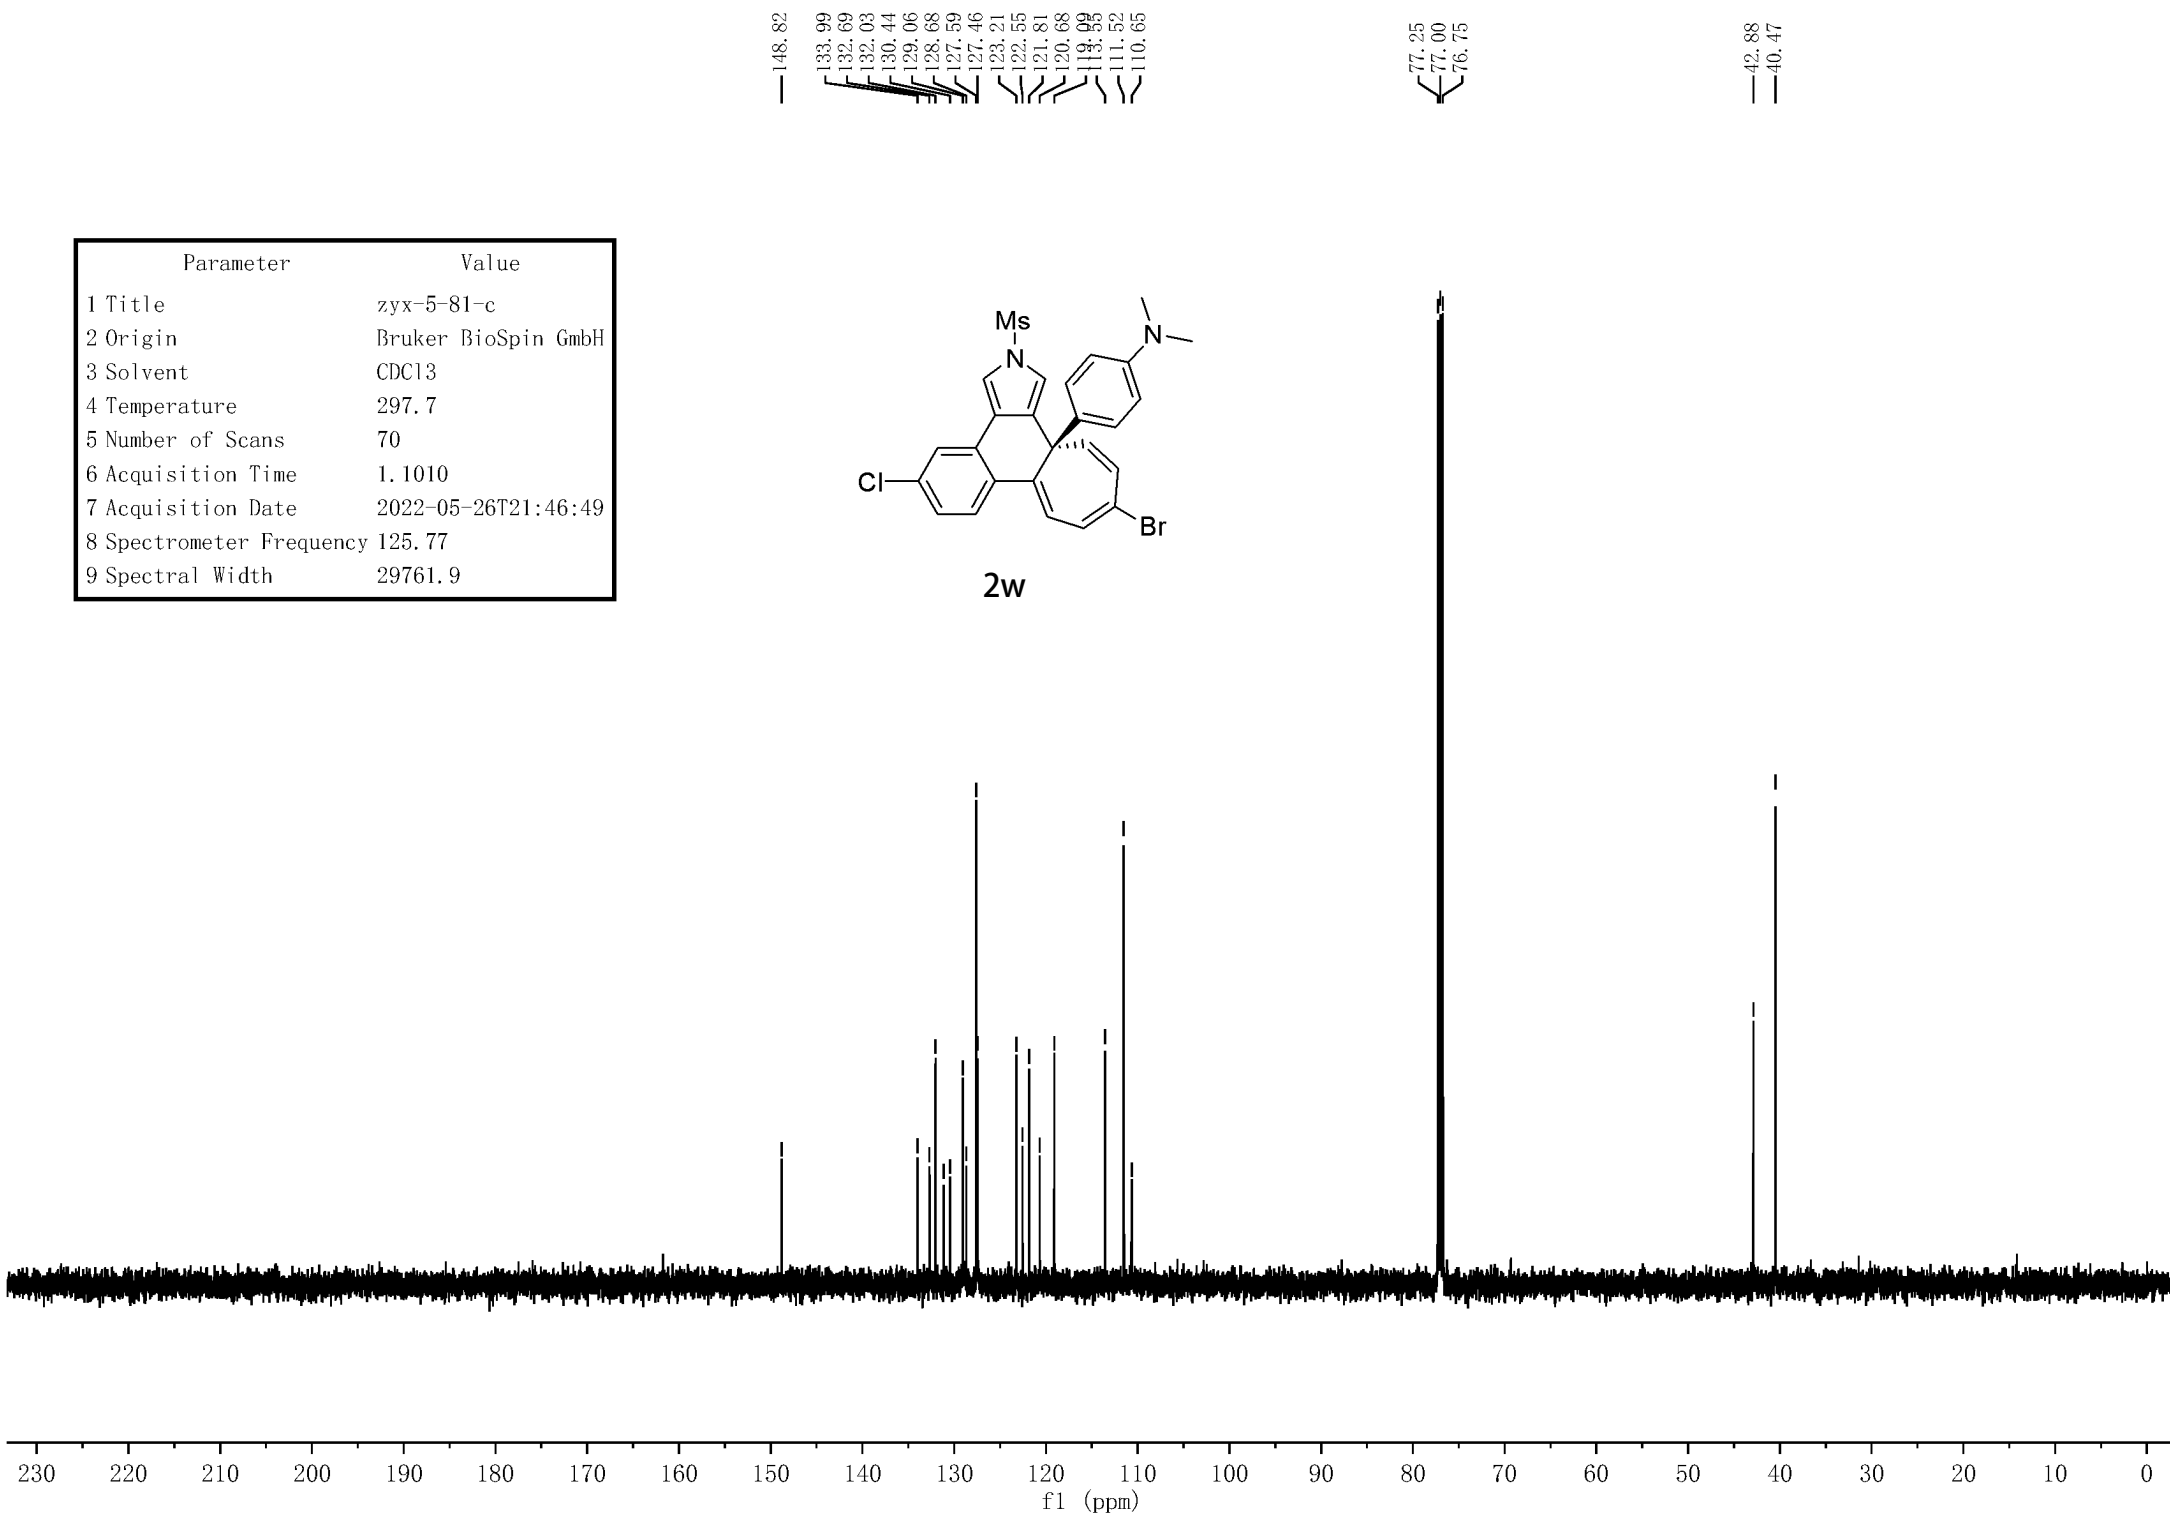

7.574  
7.553  
7.414  
7.385  
7.251  
7.247  
7.068  
7.048  
6.911  
6.889  
6.867  
6.726  
6.722  
6.721  
6.717  
6.655  
6.635  
6.555  
6.531  
6.447  
6.428

4.972  
4.949

3.085

2.851

2.366

0.000

| Parameter                | Value               |
|--------------------------|---------------------|
| 1 Title                  | ZYX-5-65-H          |
| 2 Origin                 | Bruker BioSpin GmbH |
| 3 Solvent                | CDCl3               |
| 4 Temperature            | 296.8               |
| 5 Number of Scans        | 17                  |
| 6 Acquisition Time       | 3.9846              |
| 7 Acquisition Date       | 2022-05-21T10:34:13 |
| 8 Spectrometer Frequency | 399.93              |
| 9 Spectral Width         | 8223.7              |

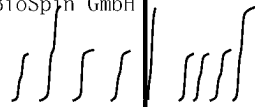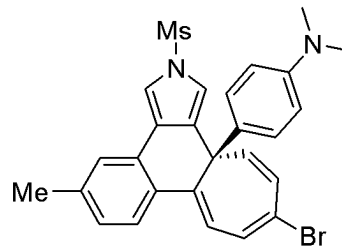

2x

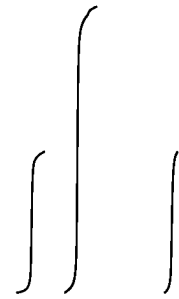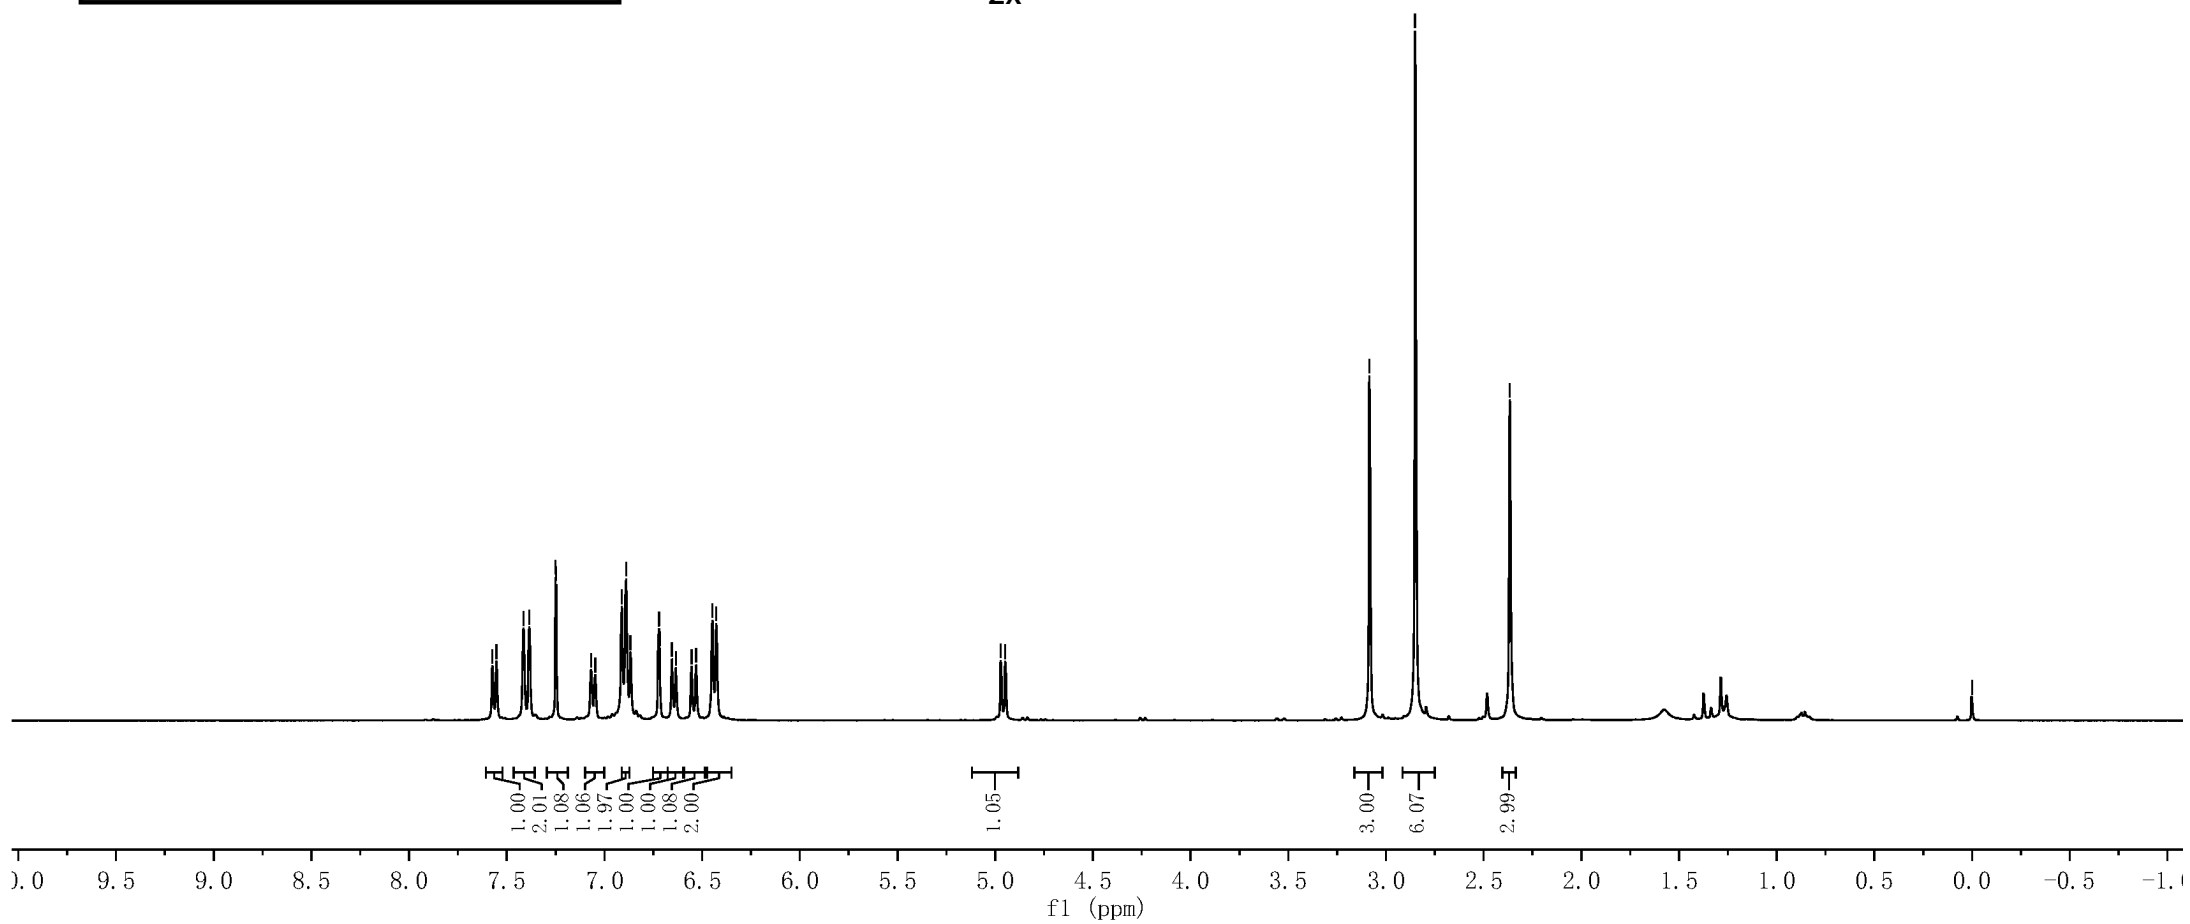

| Parameter                | Value               |
|--------------------------|---------------------|
| 1 Title                  | ZYX-5-65-C          |
| 2 Origin                 | Bruker BioSpin GmbH |
| 3 Solvent                | CDC13               |
| 4 Temperature            | 297.0               |
| 5 Number of Scans        | 85                  |
| 6 Acquisition Time       | 1.3631              |
| 7 Acquisition Date       | 2022-05-21T10:37:31 |
| 8 Spectrometer Frequency | 100.56              |
| 9 Spectral Width         | 24038.5             |

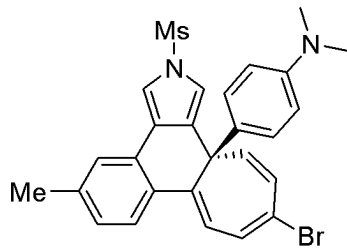

2x

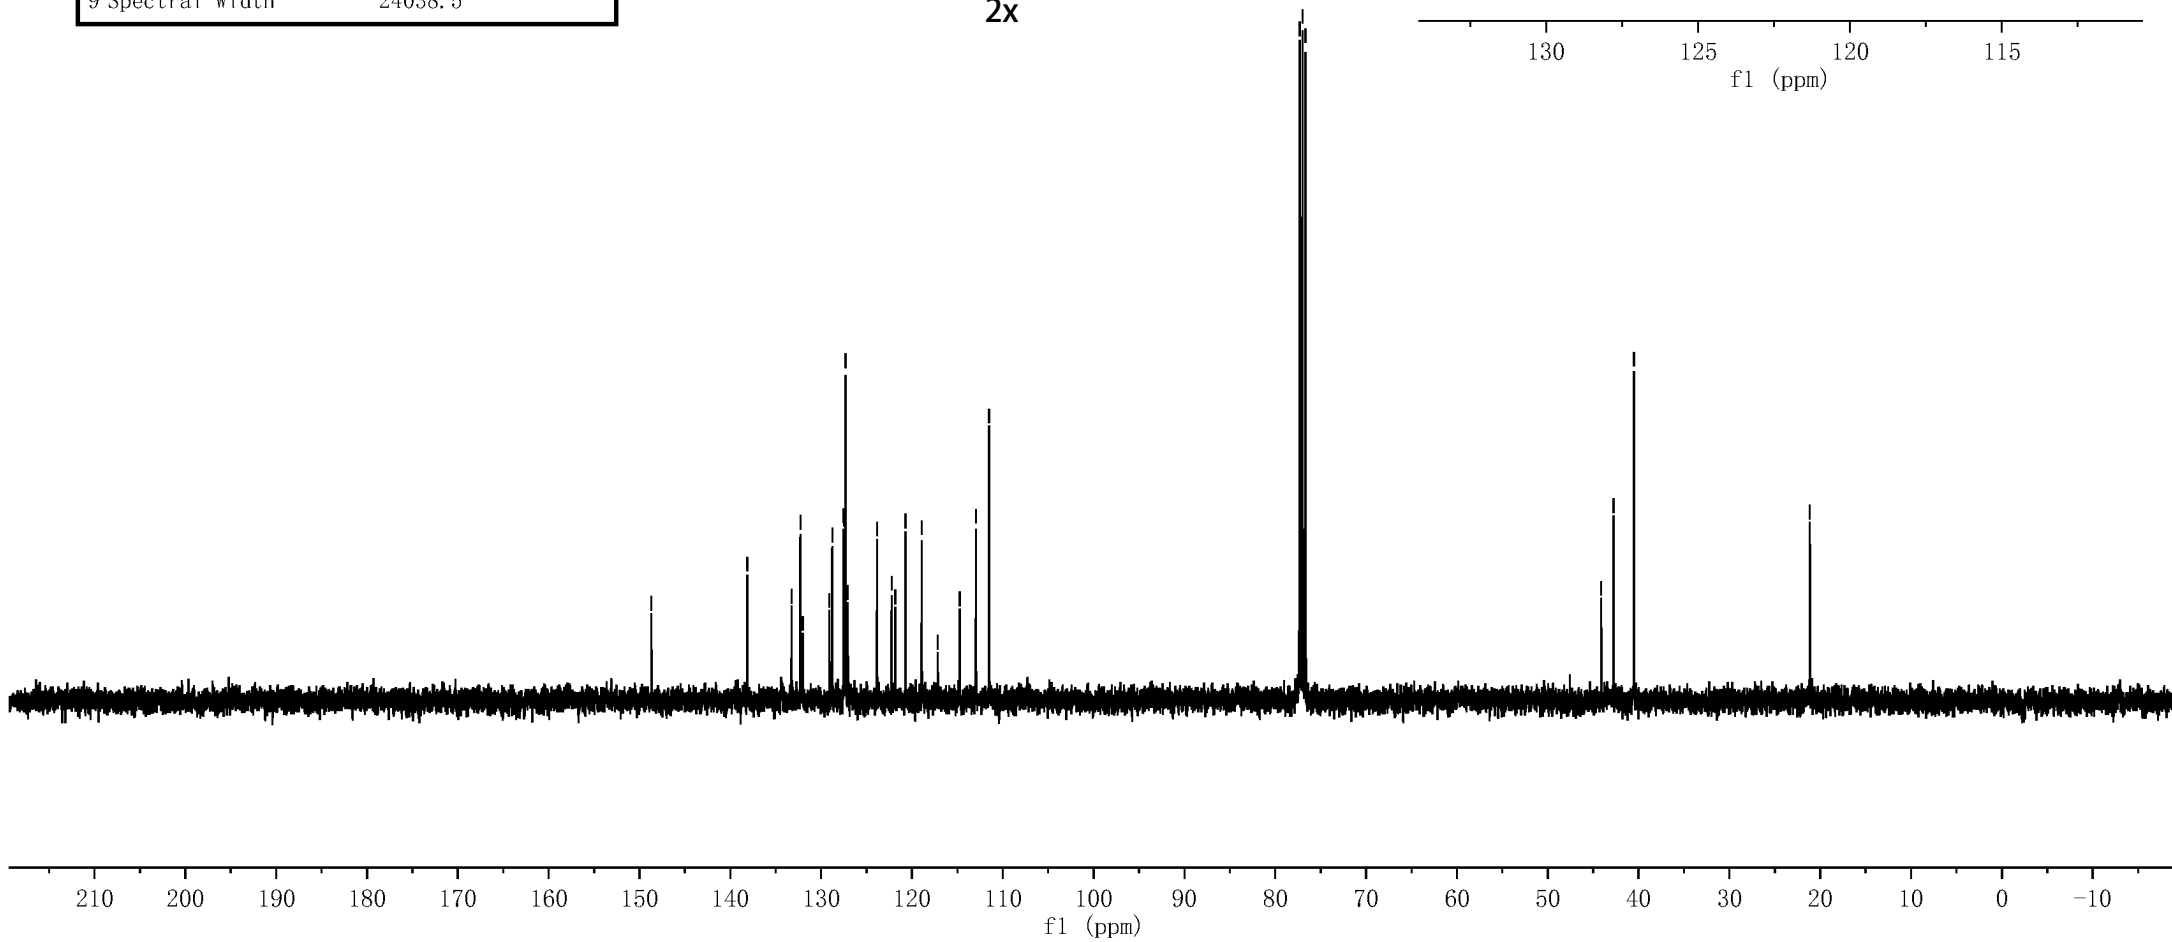

| Parameter                | Value               |
|--------------------------|---------------------|
| 1 Title                  | ZYX-5-72-H          |
| 2 Origin                 | Bruker BioSpin GmbH |
| 3 Solvent                | CDCl3               |
| 4 Temperature            | 296.9               |
| 5 Number of Scans        | 12                  |
| 6 Acquisition Time       | 3.9846              |
| 7 Acquisition Date       | 2022-05-25T15:46:40 |
| 8 Spectrometer Frequency | 399.93              |
| 9 Spectral Width         | 8223.7              |

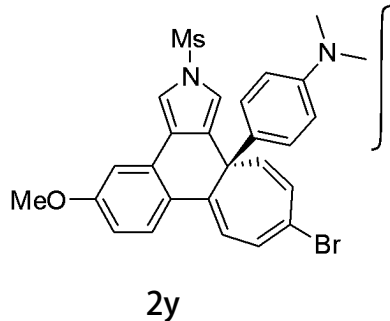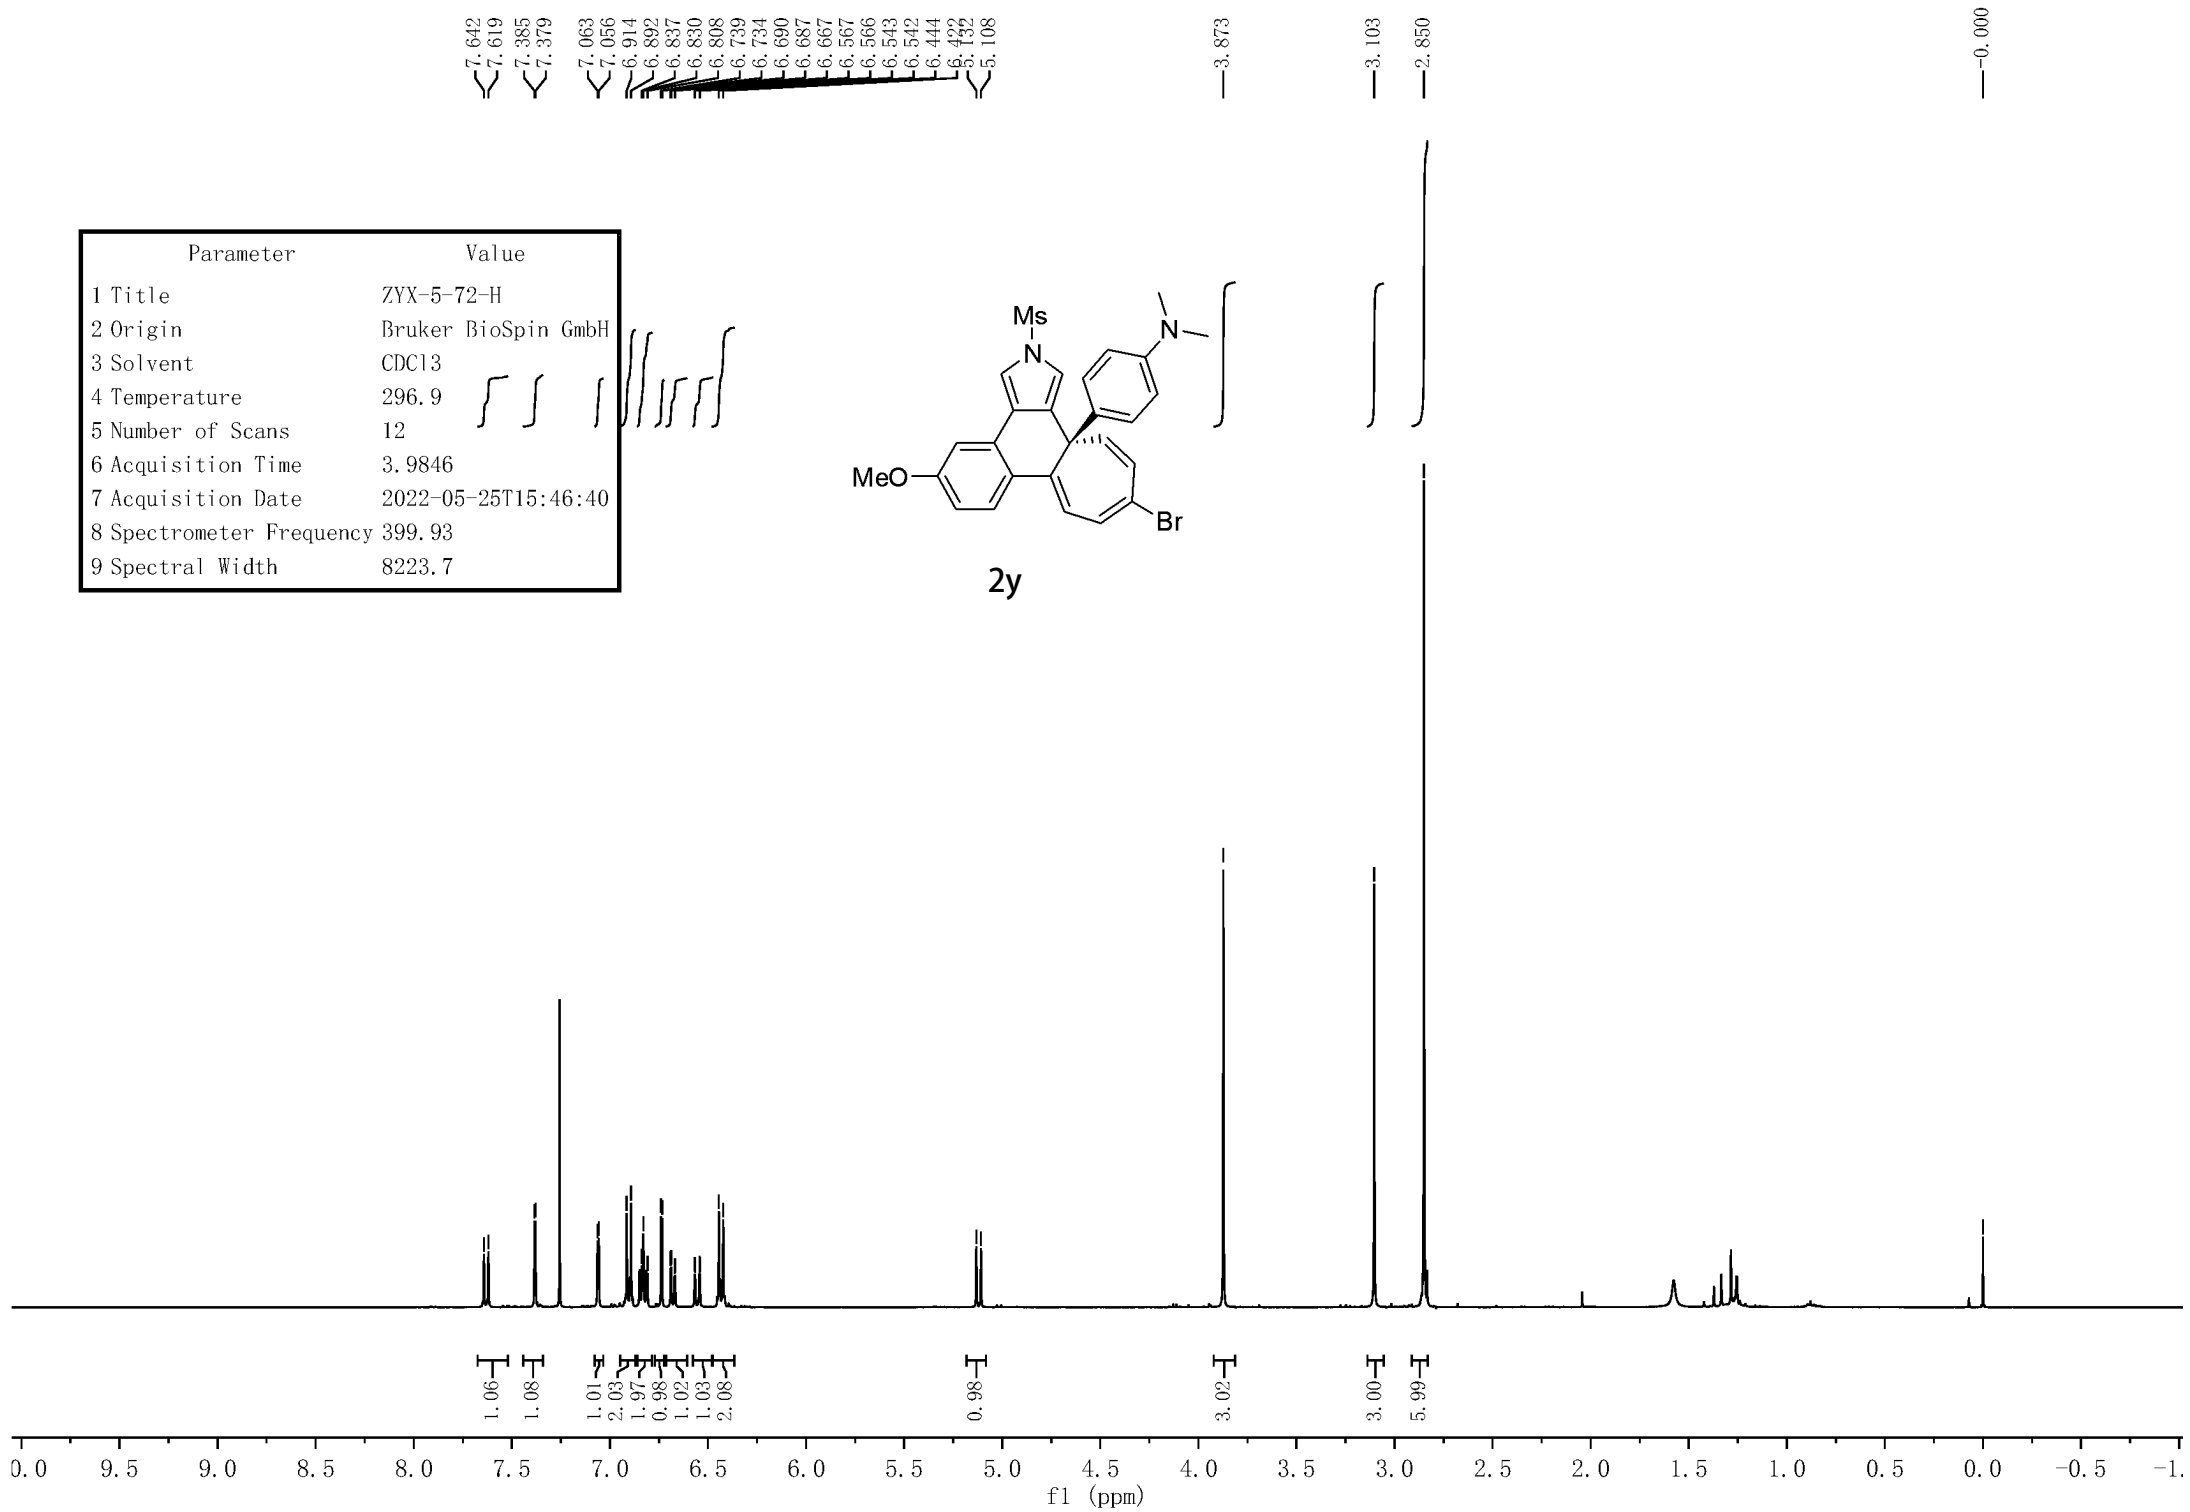



| Parameter                | Value               |
|--------------------------|---------------------|
| 1 Title                  | ZYX-5-88--C         |
| 2 Origin                 | Bruker BioSpin GmbH |
| 3 Solvent                | CDCl3               |
| 4 Temperature            | 296.6               |
| 5 Number of Scans        | 47                  |
| 6 Acquisition Time       | 1.3631              |
| 7 Acquisition Date       | 2022-05-30T16:22:56 |
| 8 Spectrometer Frequency | 100.56              |
| 9 Spectral Width         | 24038.5             |

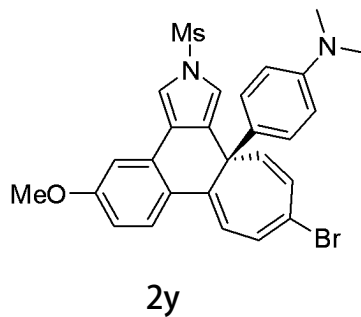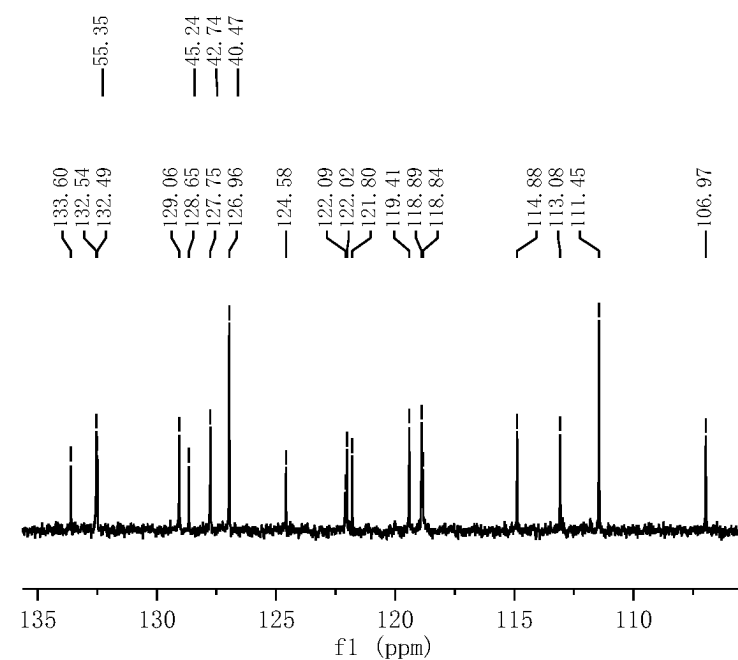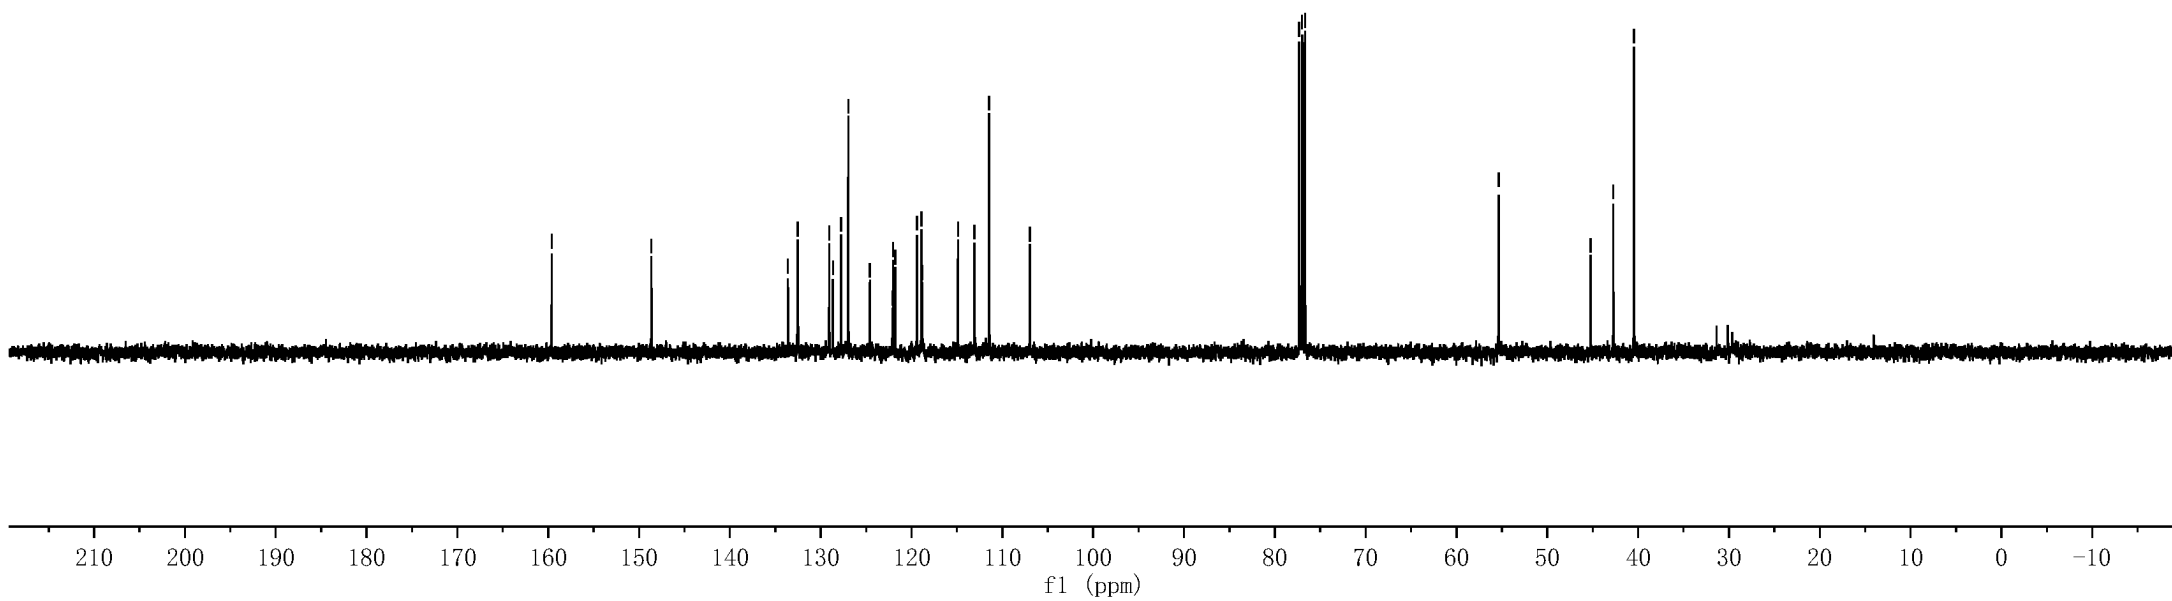

| Parameter                | Value               |
|--------------------------|---------------------|
| 1 Title                  | zyx-5-51-n          |
| 2 Origin                 | Bruker BioSpin GmbH |
| 3 Solvent                | CDCl3               |
| 4 Temperature            | 298.0               |
| 5 Number of Scans        | 6                   |
| 6 Acquisition Time       | 4.0894              |
| 7 Acquisition Date       | 2022-05-16T16:47:24 |
| 8 Spectrometer Frequency | 400.13              |
| 9 Spectral Width         | 8012.8              |

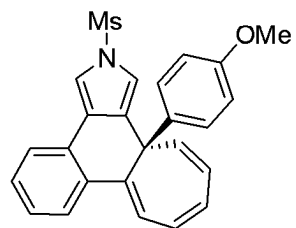

**2z**

7.642  
7.624  
7.594  
7.581  
7.400  
7.395  
7.260  
7.254  
7.243  
7.022  
7.000  
6.976  
6.708  
6.703  
6.591  
6.569  
6.435  
6.416  
6.397  
6.330  
6.311  
6.297  
6.281

4.706  
4.684

3.698

3.080

0.000

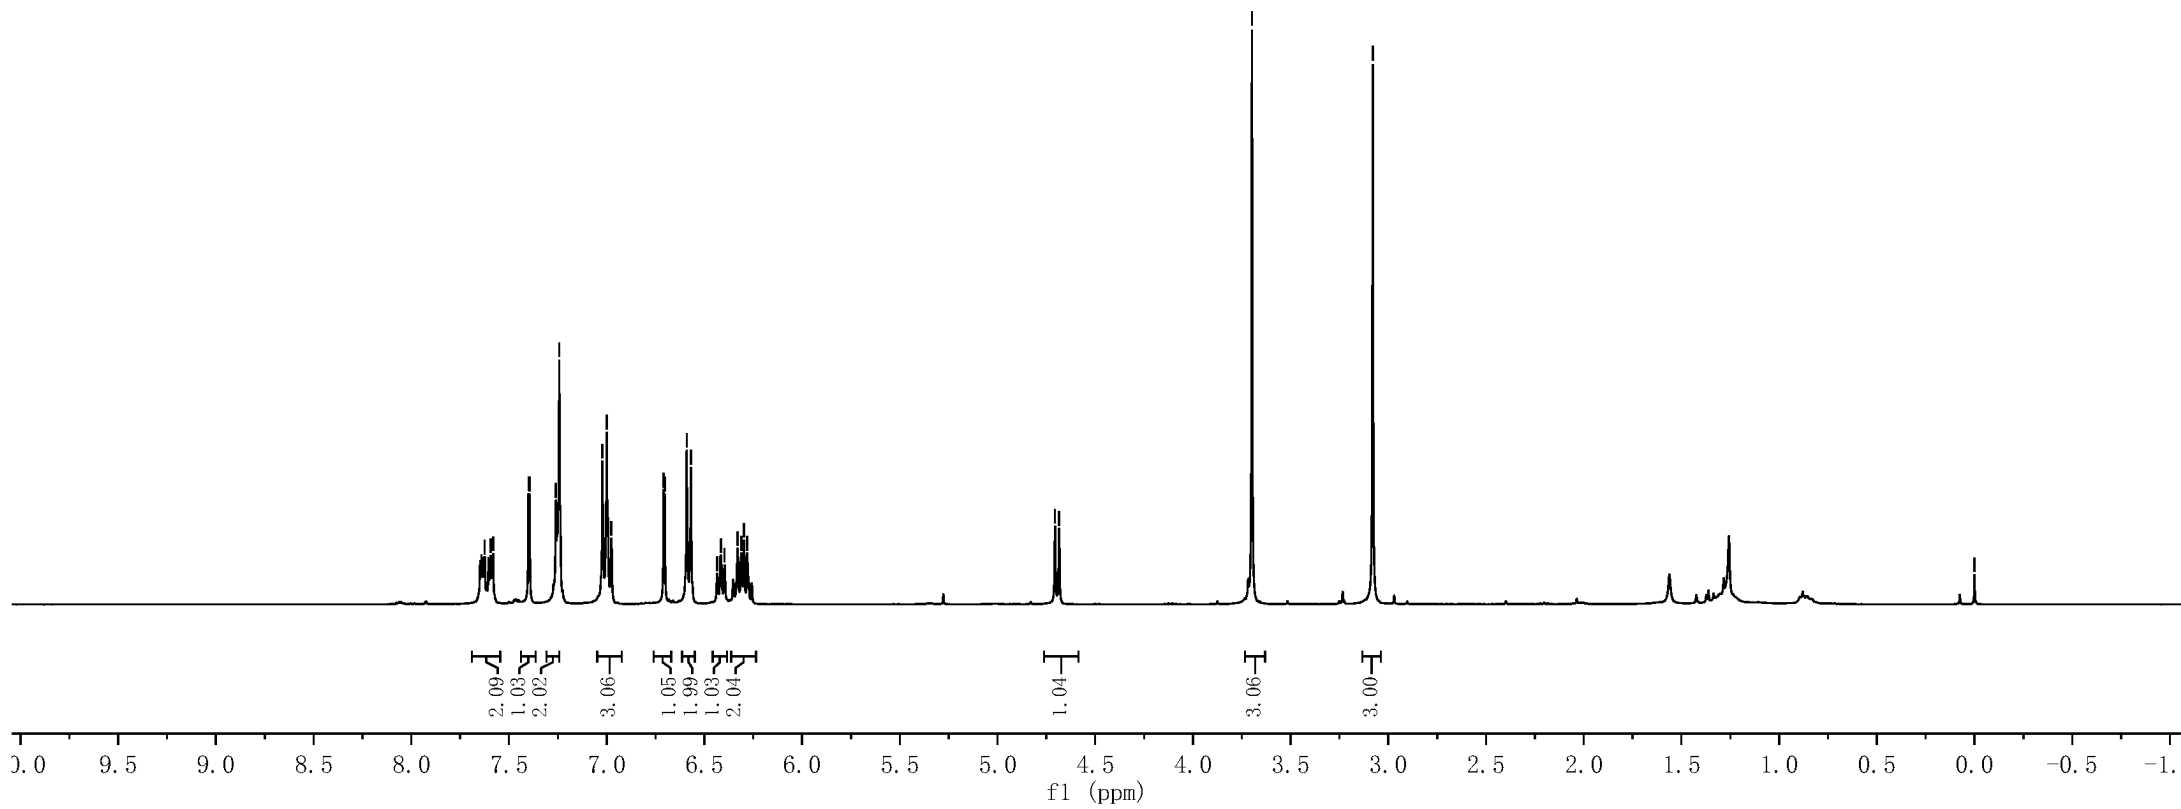

| Parameter                | Value               |
|--------------------------|---------------------|
| 1 Title                  | ZYX-5-51-C          |
| 2 Origin                 | Bruker BioSpin GmbH |
| 3 Solvent                | CDCl3               |
| 4 Temperature            | 300.0               |
| 5 Number of Scans        | 52                  |
| 6 Acquisition Time       | 1.3631              |
| 7 Acquisition Date       | 2022-05-16T16:48:36 |
| 8 Spectrometer Frequency | 100.61              |
| 9 Spectral Width         | 24038.5             |



2z

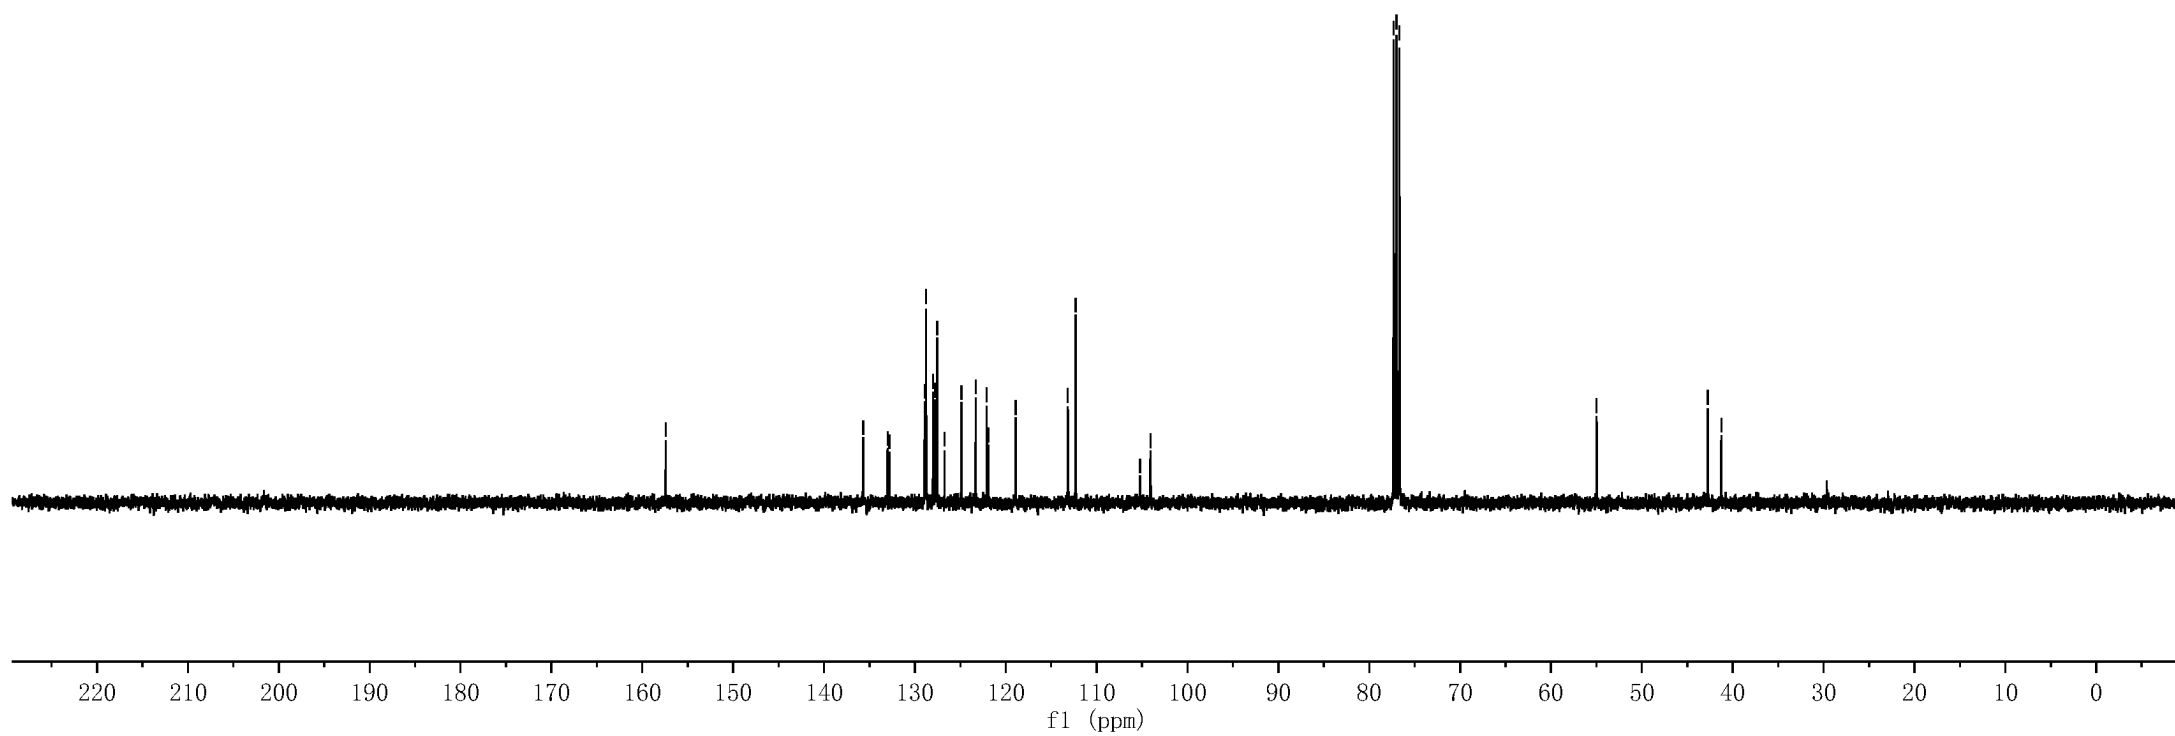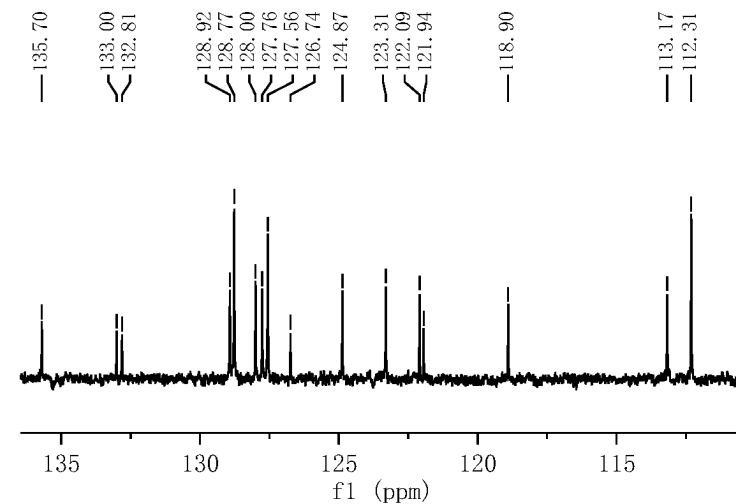

7.632  
7.624  
7.617  
7.609  
7.594  
7.587  
7.580  
7.572  
7.385  
7.379  
7.248  
7.236  
7.230  
7.221  
7.019  
6.997  
6.861  
6.842  
6.674  
6.668  
6.595  
6.573  
6.172  
6.150  
6.091  
6.071

4.582  
4.560

3.710

3.076

1.838

0.000

| Parameter                | Value               |
|--------------------------|---------------------|
| 1 Title                  | ZYX-5-55-H          |
| 2 Origin                 | Bruker BioSpin GmbH |
| 3 Solvent                | CDCl3               |
| 4 Temperature            | 298.0               |
| 5 Number of Scans        | 8                   |
| 6 Acquisition Time       | 4.0894              |
| 7 Acquisition Date       | 2022-05-19T15:46:40 |
| 8 Spectrometer Frequency | 400.13              |
| 9 Spectral Width         | 8012.8              |

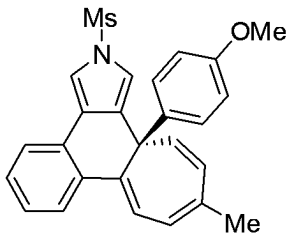

**2aa**

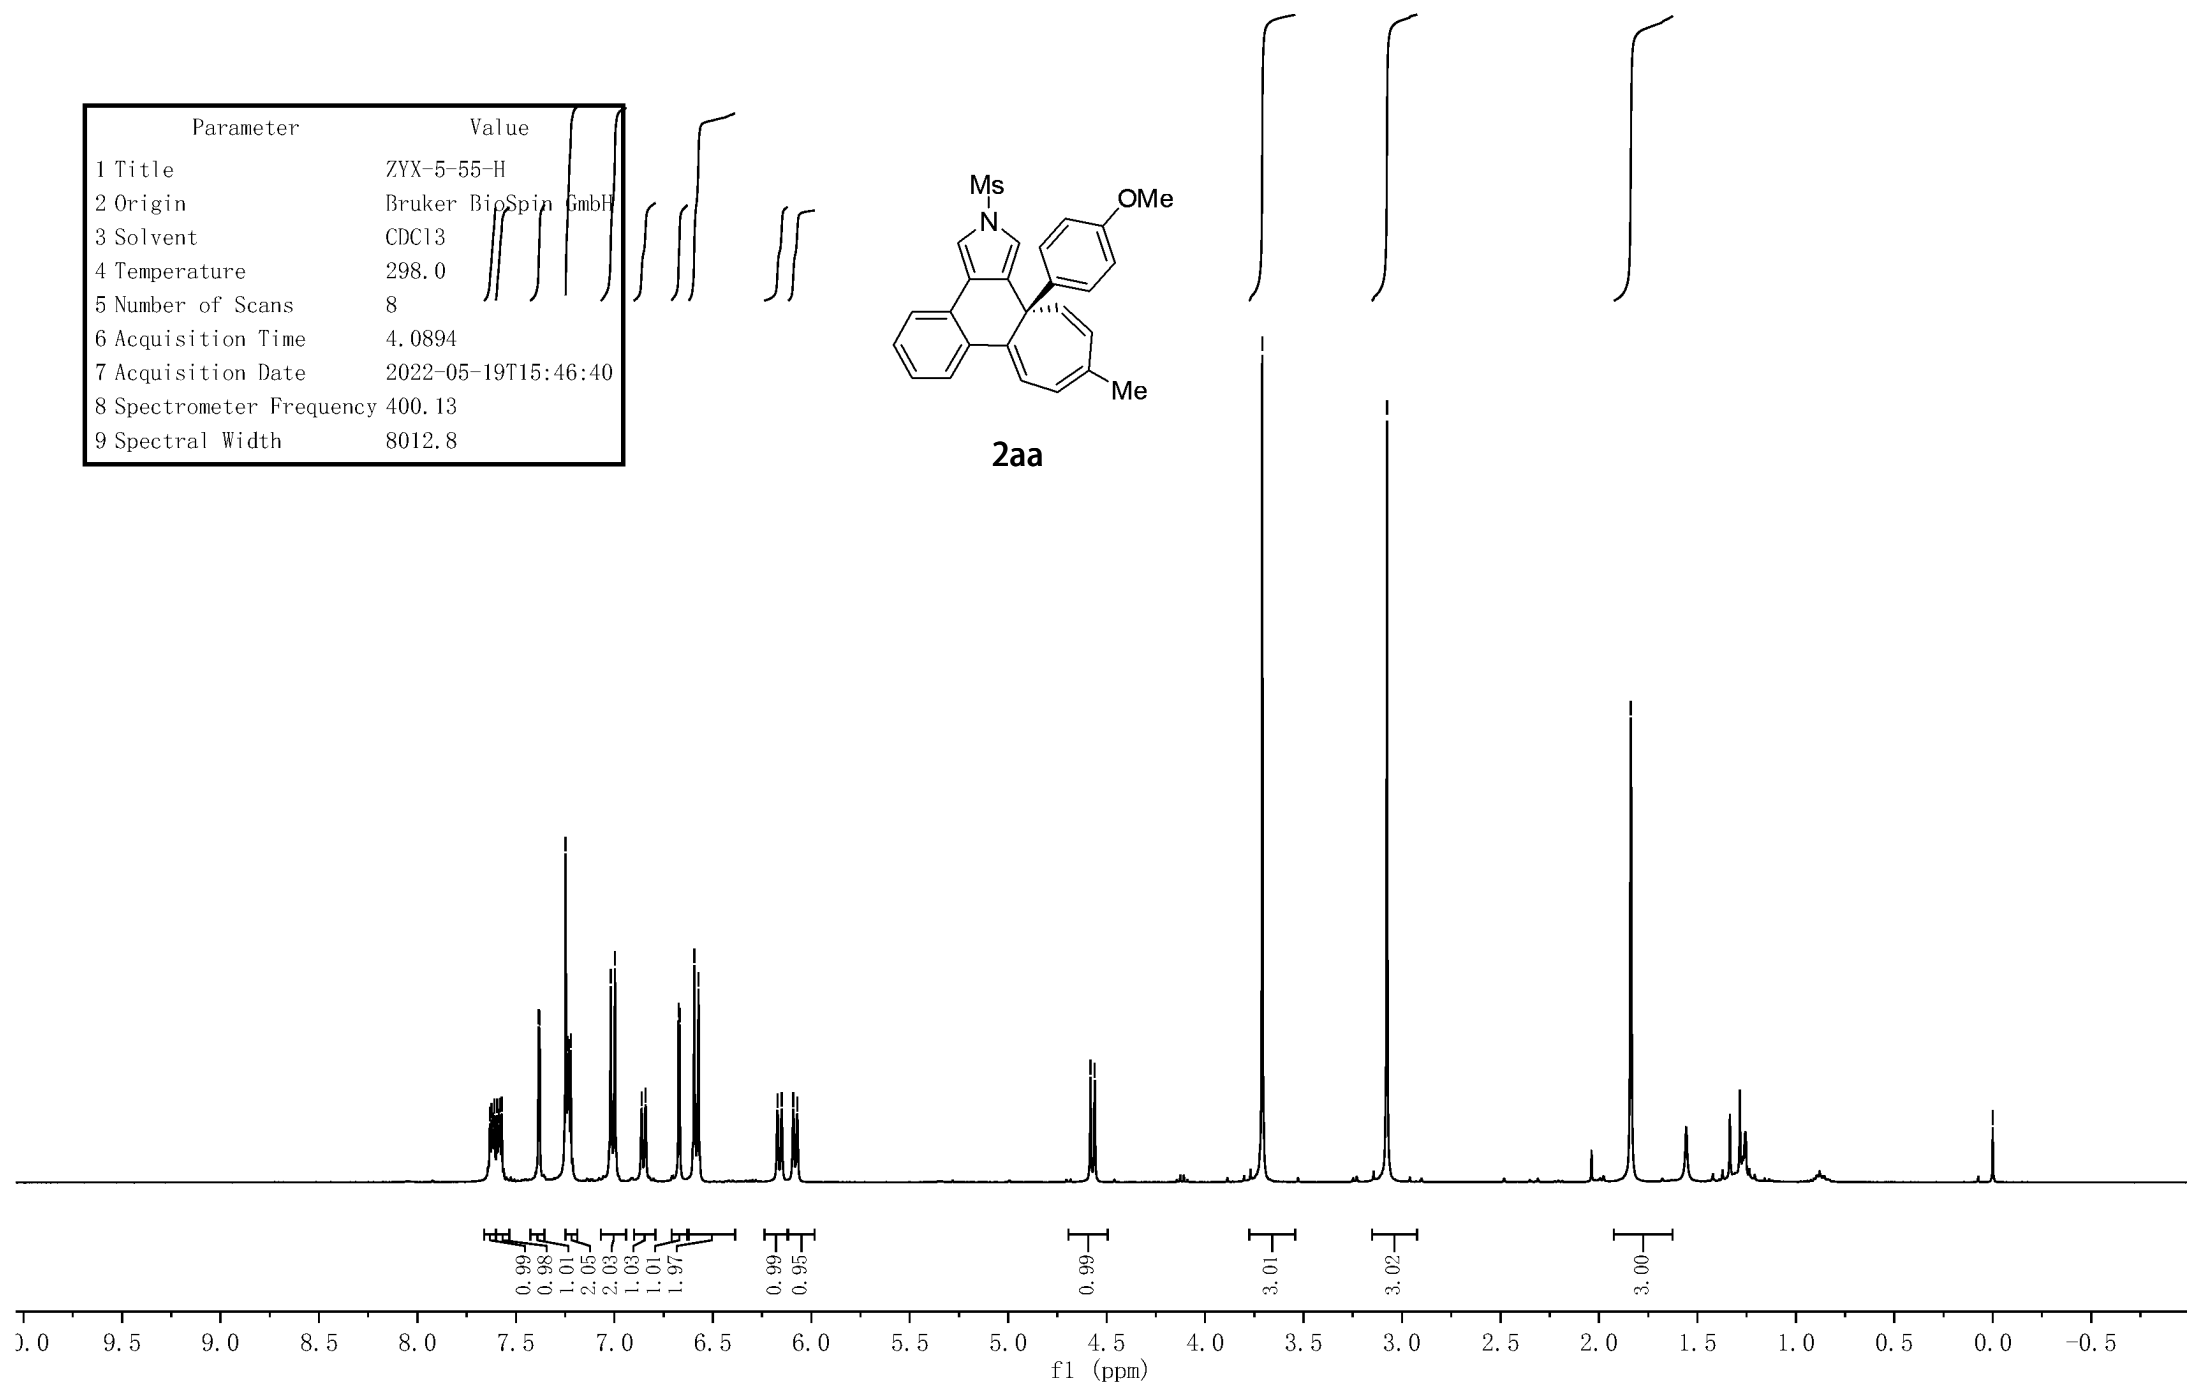

| Parameter                | Value               |
|--------------------------|---------------------|
| 1 Title                  | ZYX-5-55--C         |
| 2 Origin                 | Bruker BioSpin GmbH |
| 3 Solvent                | CDCl3               |
| 4 Temperature            | 297.5               |
| 5 Number of Scans        | 128                 |
| 6 Acquisition Time       | 1.3631              |
| 7 Acquisition Date       | 2022-08-30T09:50:06 |
| 8 Spectrometer Frequency | 100.56              |
| 9 Spectral Width         | 24038.5             |

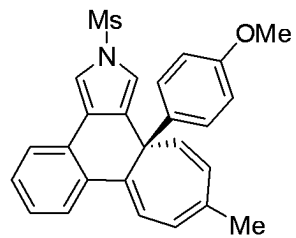

2aa

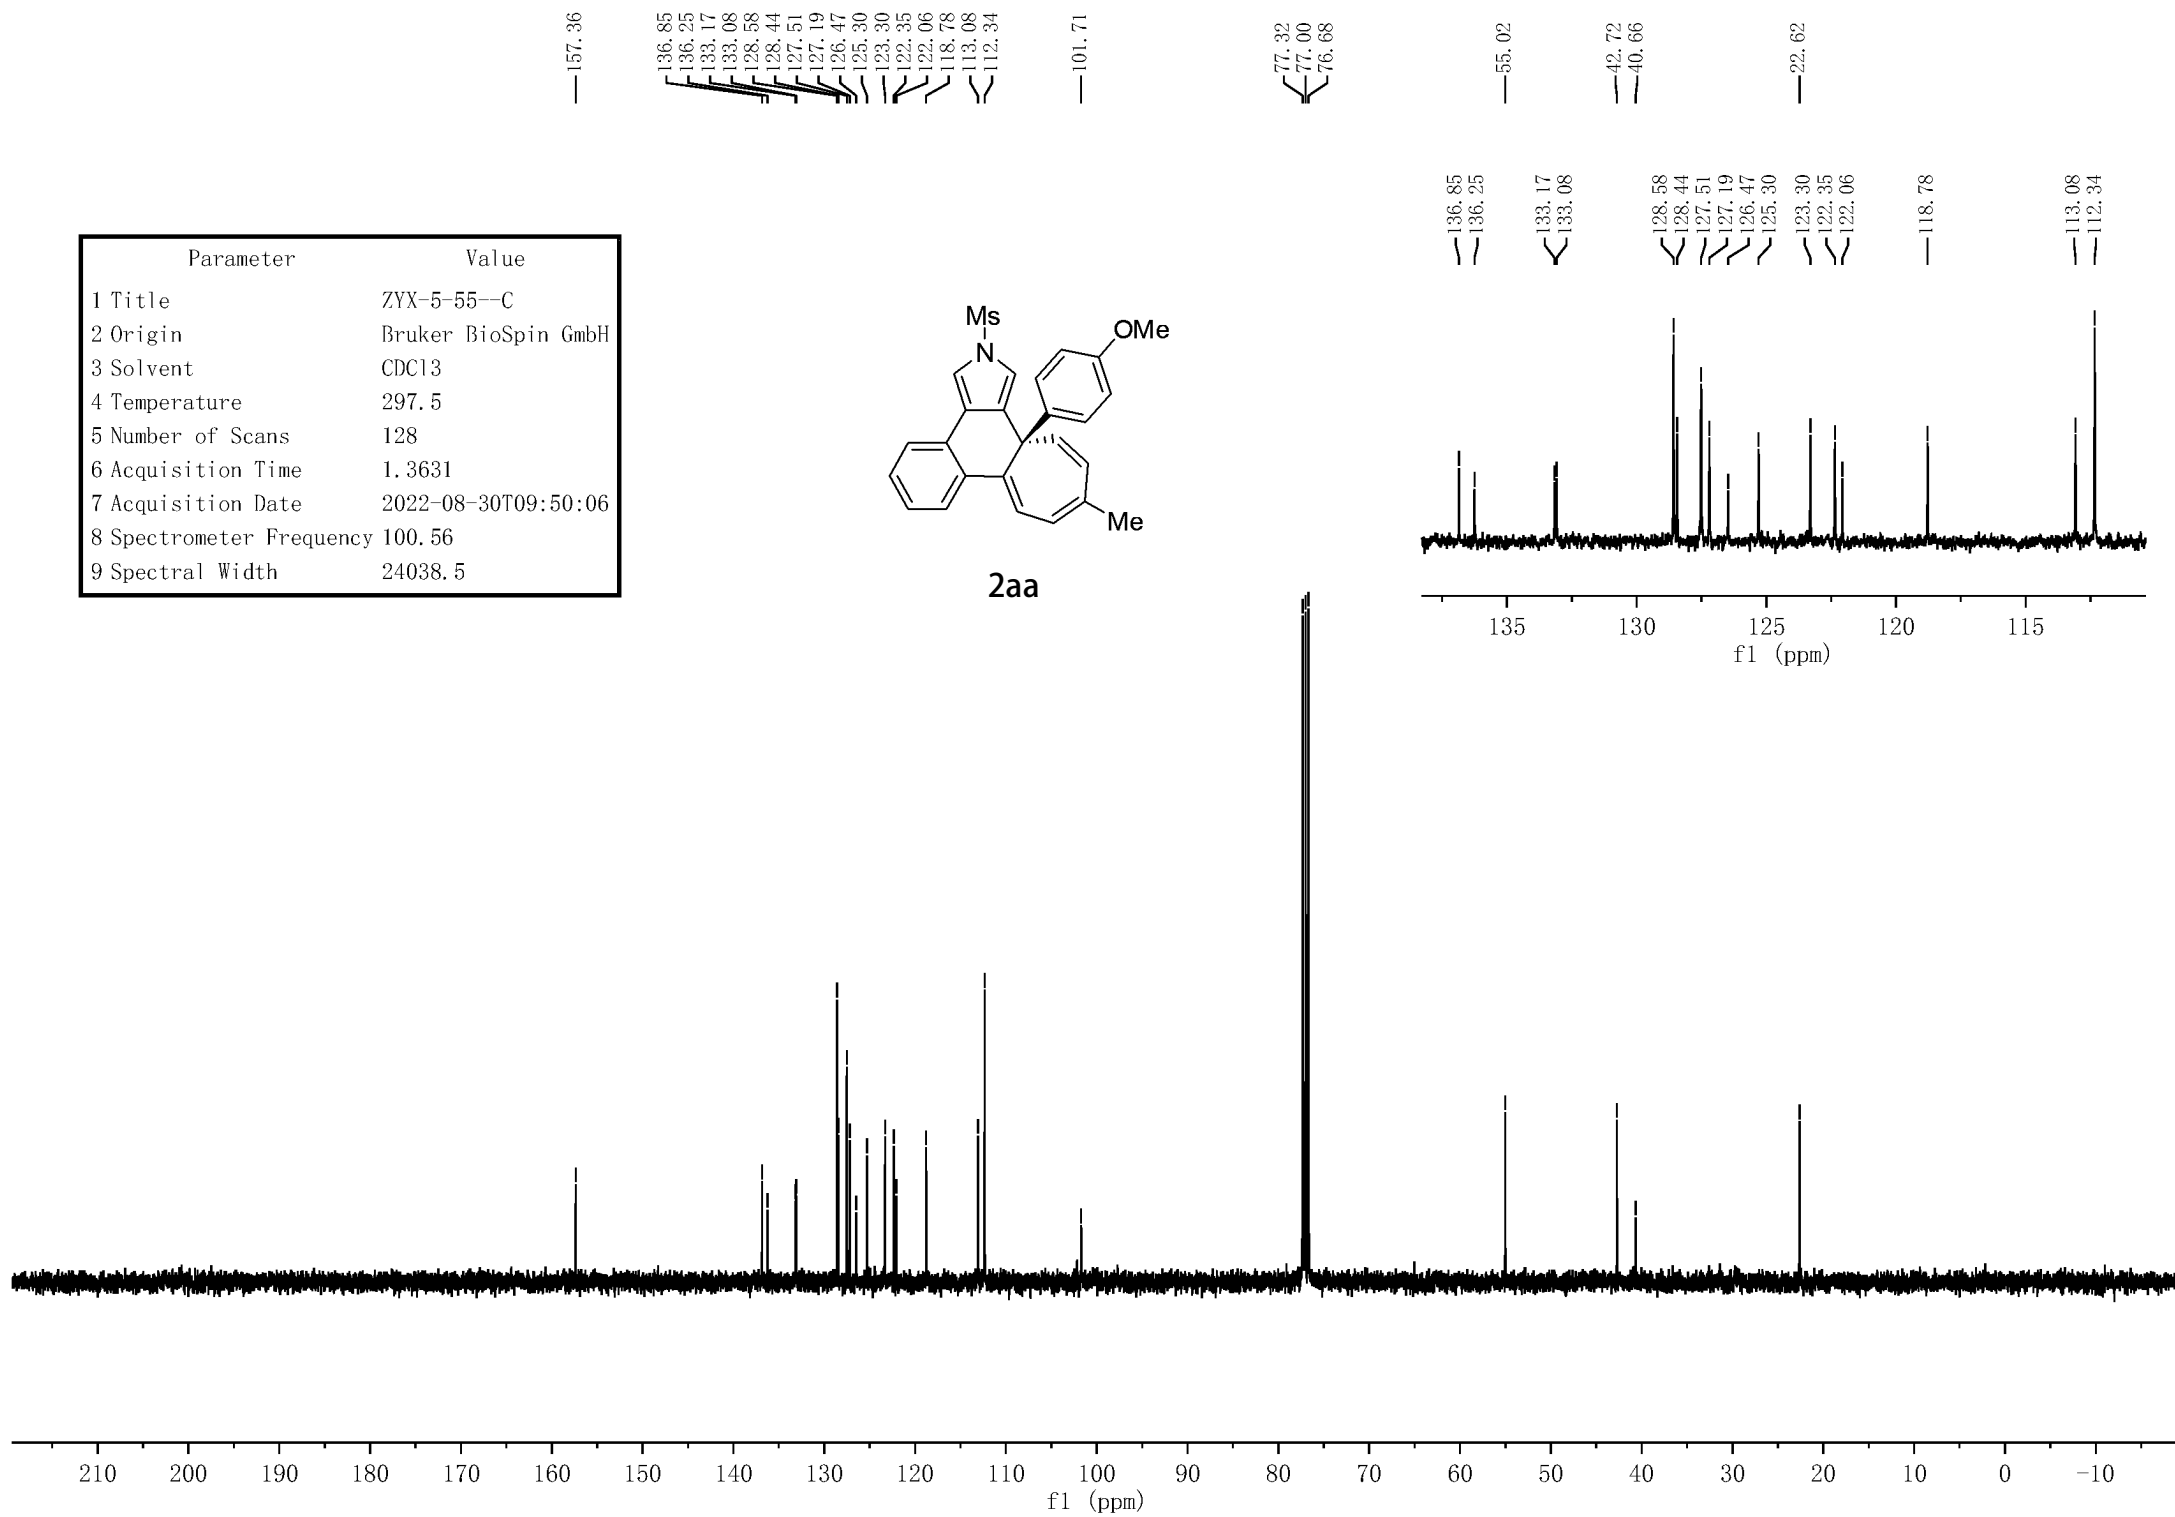

| Parameter                | Value               |
|--------------------------|---------------------|
| 1 Title                  | zyx-5-173-h         |
| 2 Origin                 | Bruker BioSpin GmbH |
| 3 Solvent                | CDCl3               |
| 4 Temperature            | 296.0               |
| 5 Number of Scans        | 9                   |
| 6 Acquisition Time       | 3.9846              |
| 7 Acquisition Date       | 2022-07-06T10:27:34 |
| 8 Spectrometer Frequency | 399.93              |
| 9 Spectral Width         | 8223.7              |

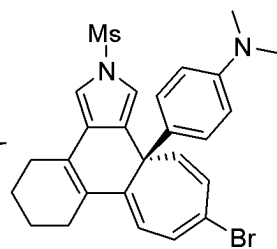

2ab

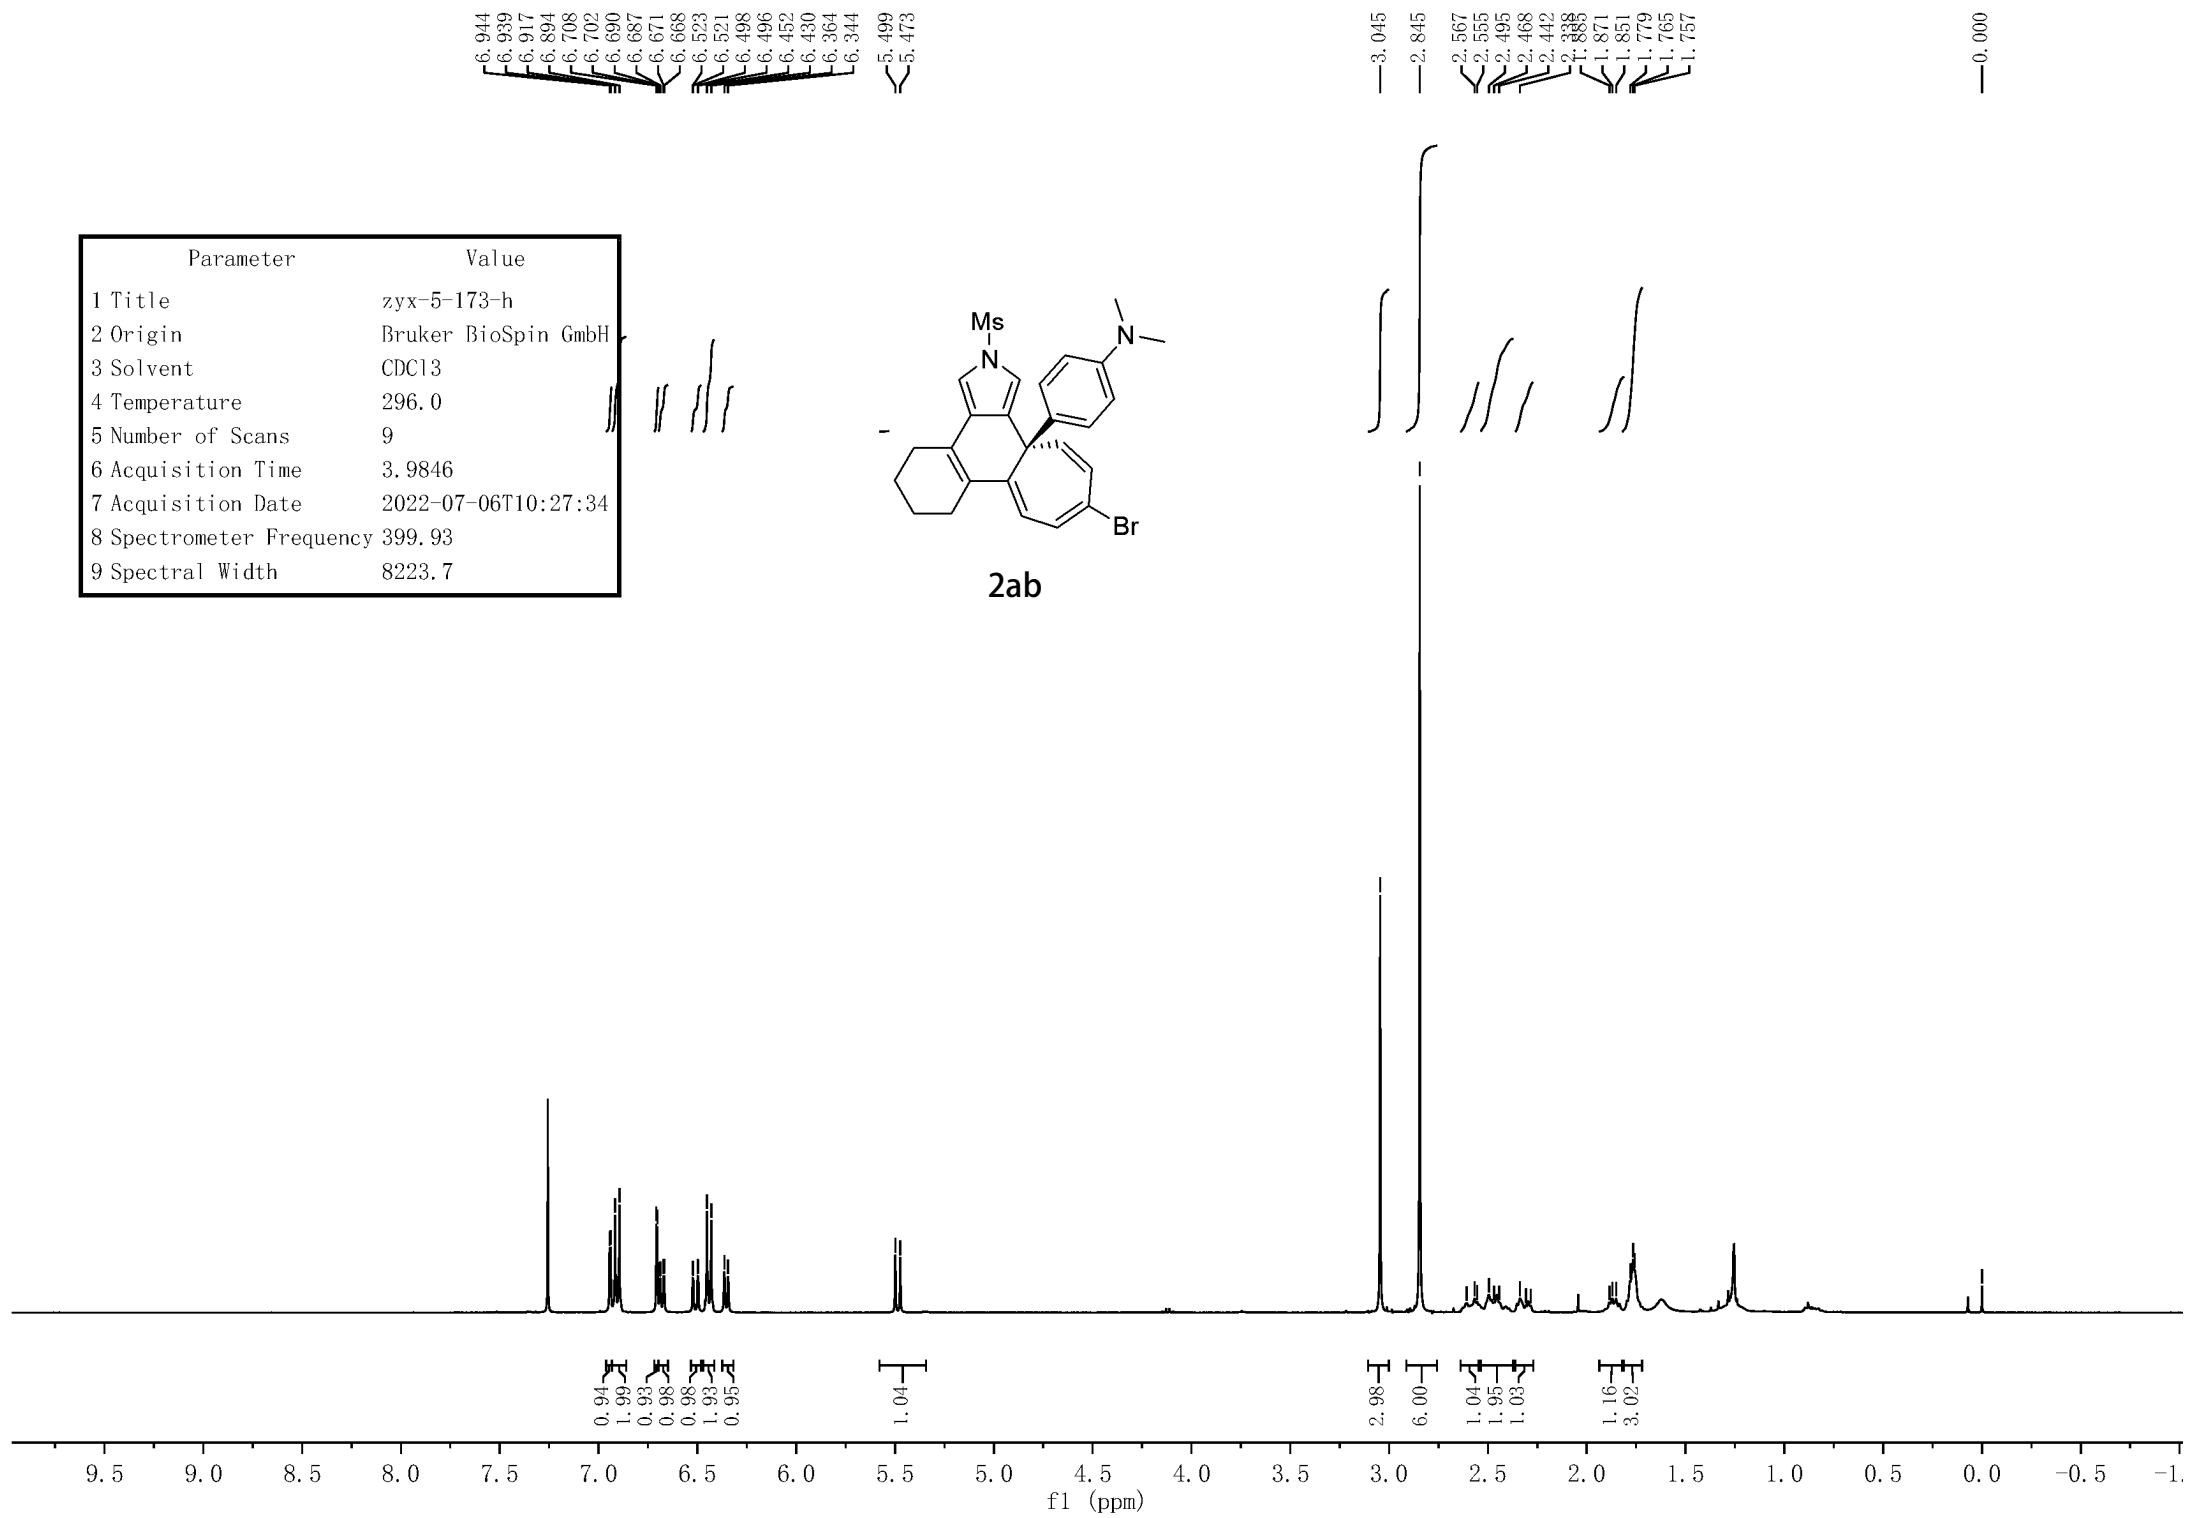

| Parameter                | Value               |
|--------------------------|---------------------|
| 1 Title                  | zyx-5-173-C         |
| 2 Origin                 | Bruker BioSpin GmbH |
| 3 Solvent                | CDC13               |
| 4 Temperature            | 296.4               |
| 5 Number of Scans        | 112                 |
| 6 Acquisition Time       | 1.3631              |
| 7 Acquisition Date       | 2022-07-06T10:30:38 |
| 8 Spectrometer Frequency | 100.56              |
| 9 Spectral Width         | 24038.5             |

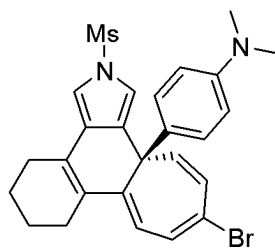

2ab

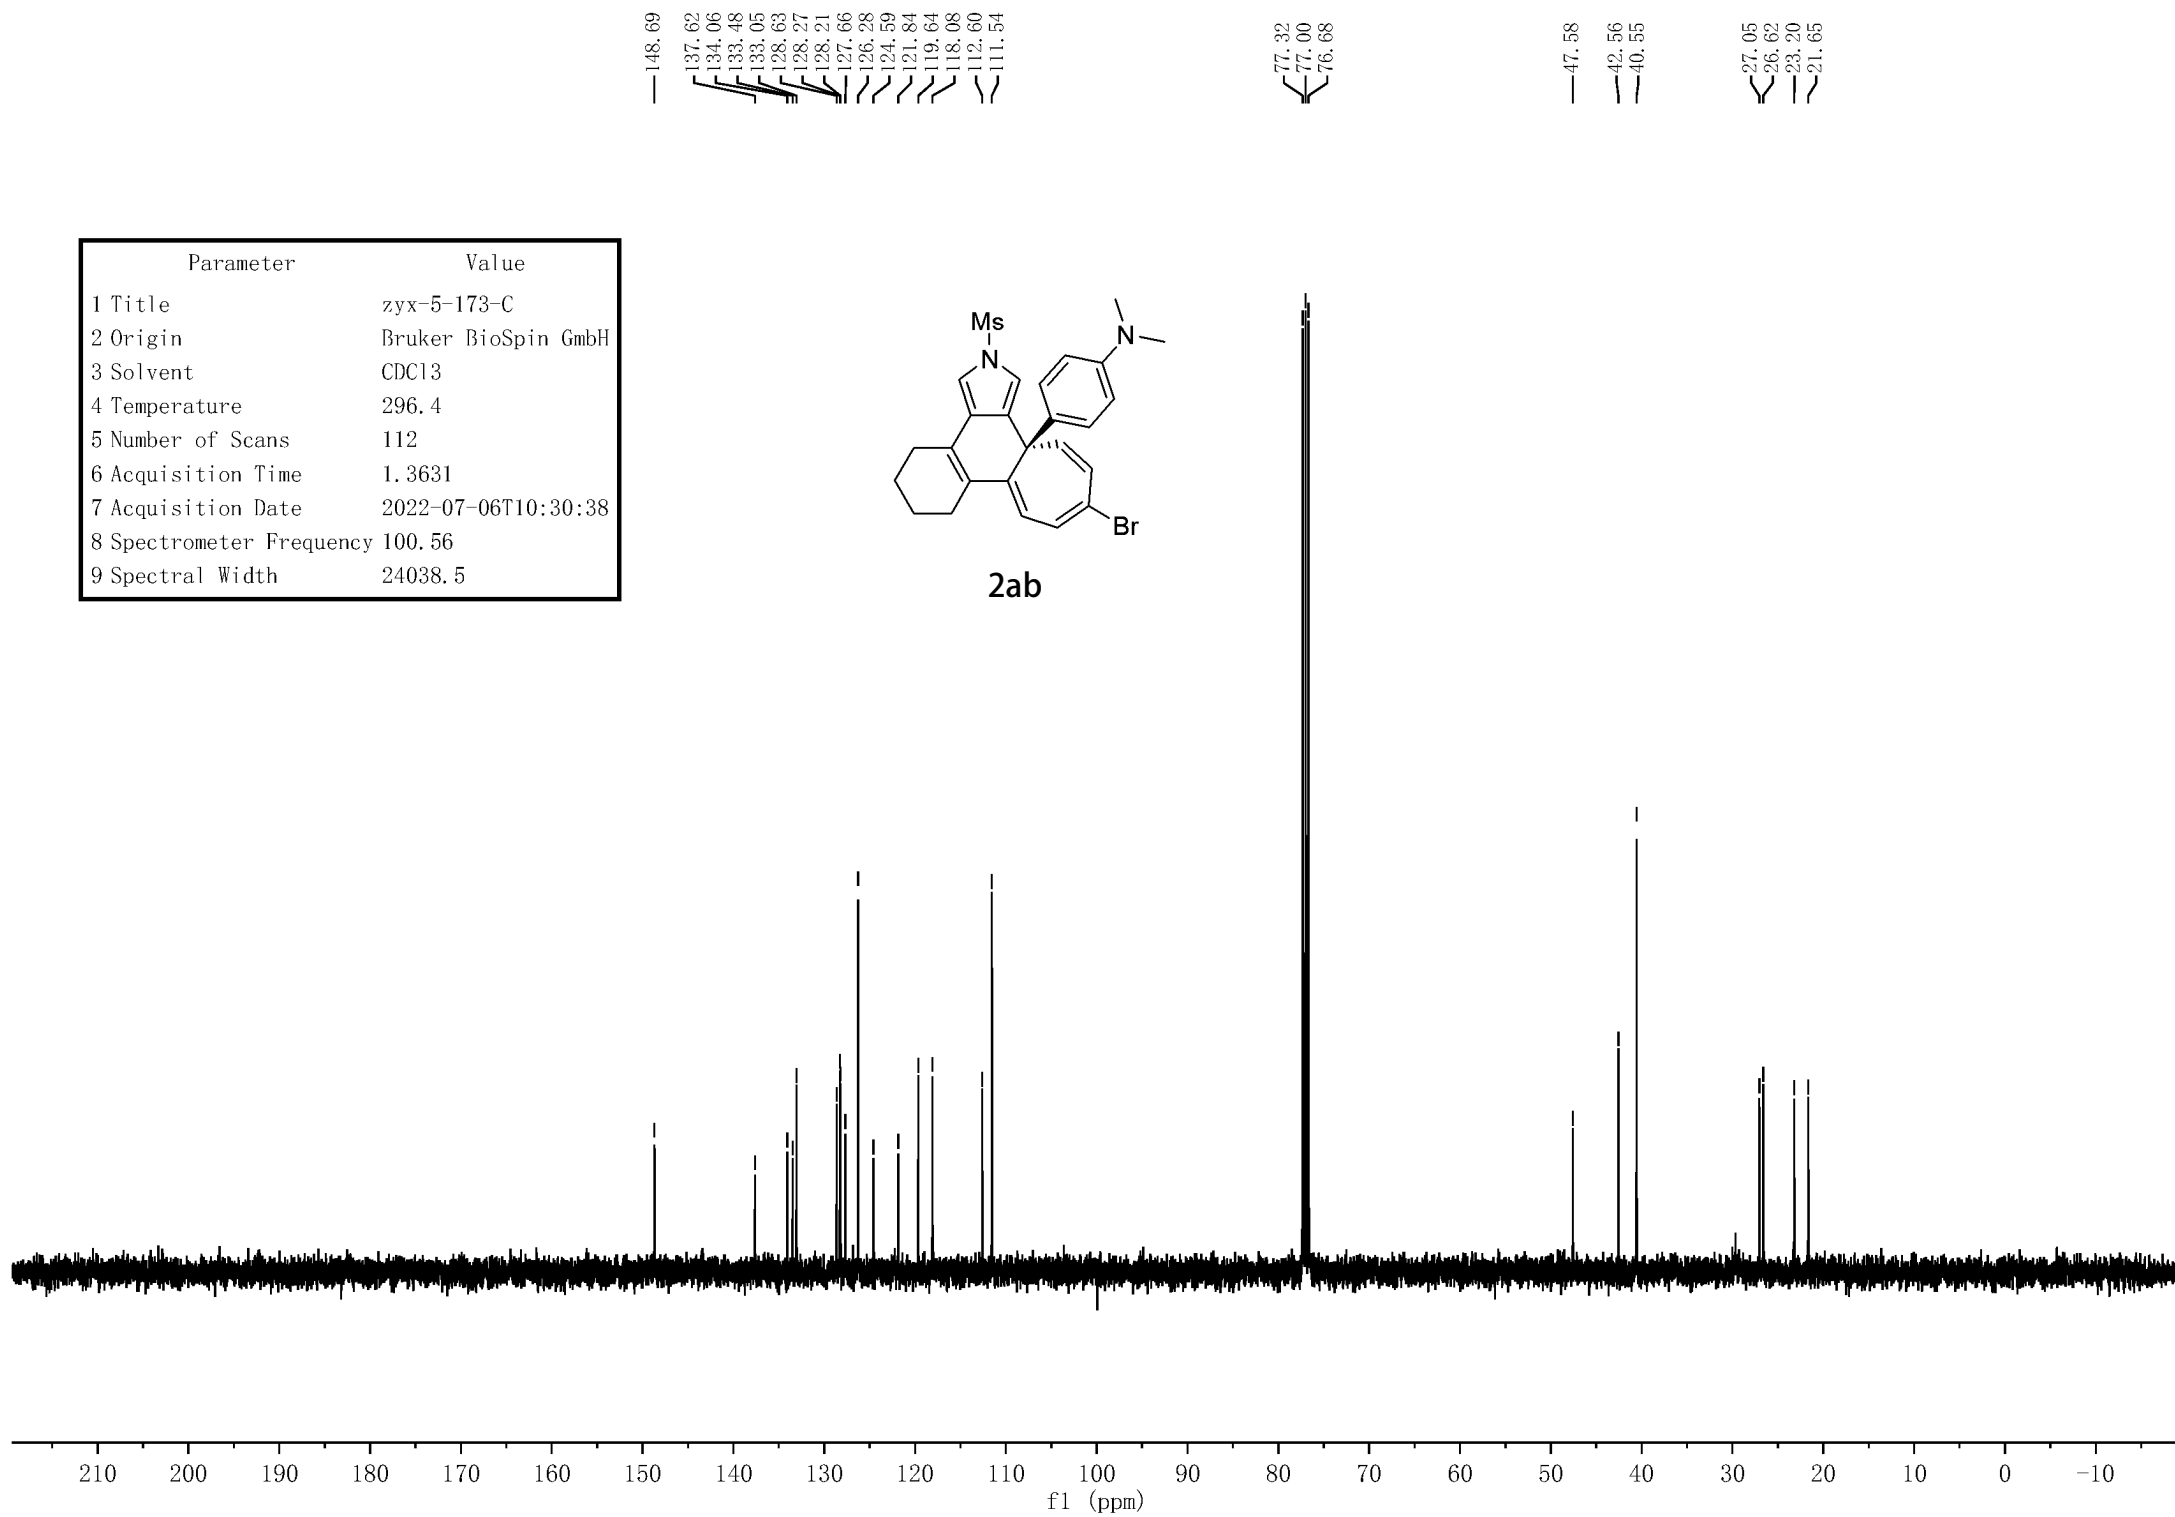

| Parameter                | Value               |
|--------------------------|---------------------|
| 1 Title                  | zyx-4-238-h         |
| 2 Origin                 | Bruker BioSpin GmbH |
| 3 Solvent                | CDCl3               |
| 4 Temperature            | 295.6               |
| 5 Number of Scans        | 15                  |
| 6 Acquisition Time       | 3.9846              |
| 7 Acquisition Date       | 2022-04-23T11:08:26 |
| 8 Spectrometer Frequency | 399.93              |
| 9 Spectral Width         | 8223.7              |

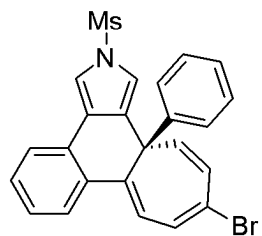

2ac

7.688  
7.668  
7.614  
7.611  
7.595  
7.592  
7.413  
7.407  
7.320  
7.302  
7.267  
7.247  
7.078  
7.069  
7.049  
6.965  
6.945  
6.717  
6.711  
6.654  
6.652  
6.634  
6.632  
6.597  
6.573

5.071  
5.048

3.078

0.000

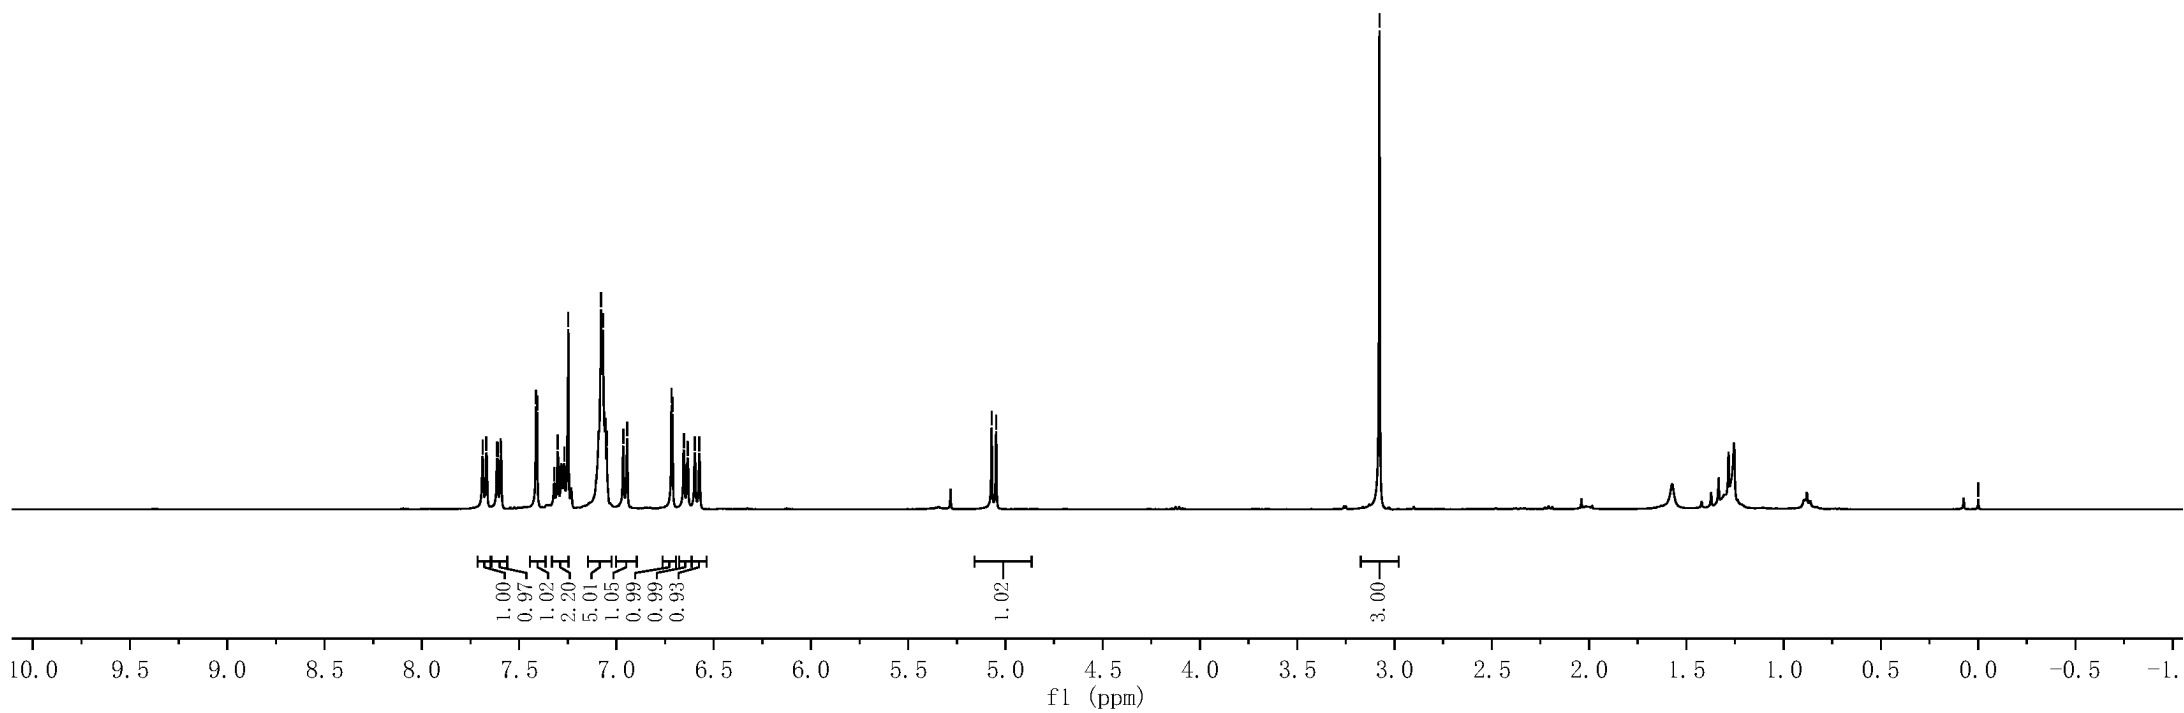



| Parameter                | Value               |
|--------------------------|---------------------|
| 1 Title                  | zyx-4-238-c         |
| 2 Origin                 | Bruker BioSpin GmbH |
| 3 Solvent                | CDCl3               |
| 4 Temperature            | 295.8               |
| 5 Number of Scans        | 65                  |
| 6 Acquisition Time       | 1.3631              |
| 7 Acquisition Date       | 2022-04-23T11:11:54 |
| 8 Spectrometer Frequency | 100.56              |
| 9 Spectral Width         | 24038.5             |

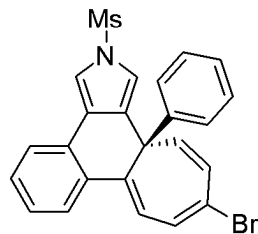

2ac

144.09  
132.43  
132.07  
131.28  
128.34  
127.75  
127.72  
127.44  
127.30  
127.17  
126.60  
126.17  
123.51  
123.00  
121.68  
121.45  
119.20  
117.72  
115.46  
113.26

77.32  
77.00  
76.68

45.13  
42.80

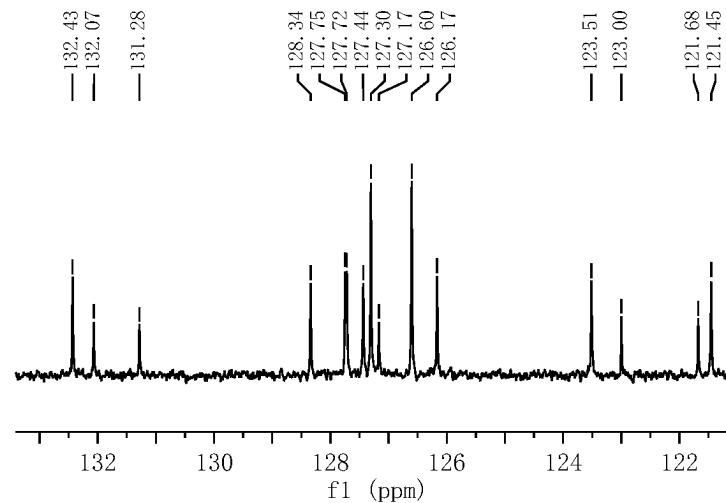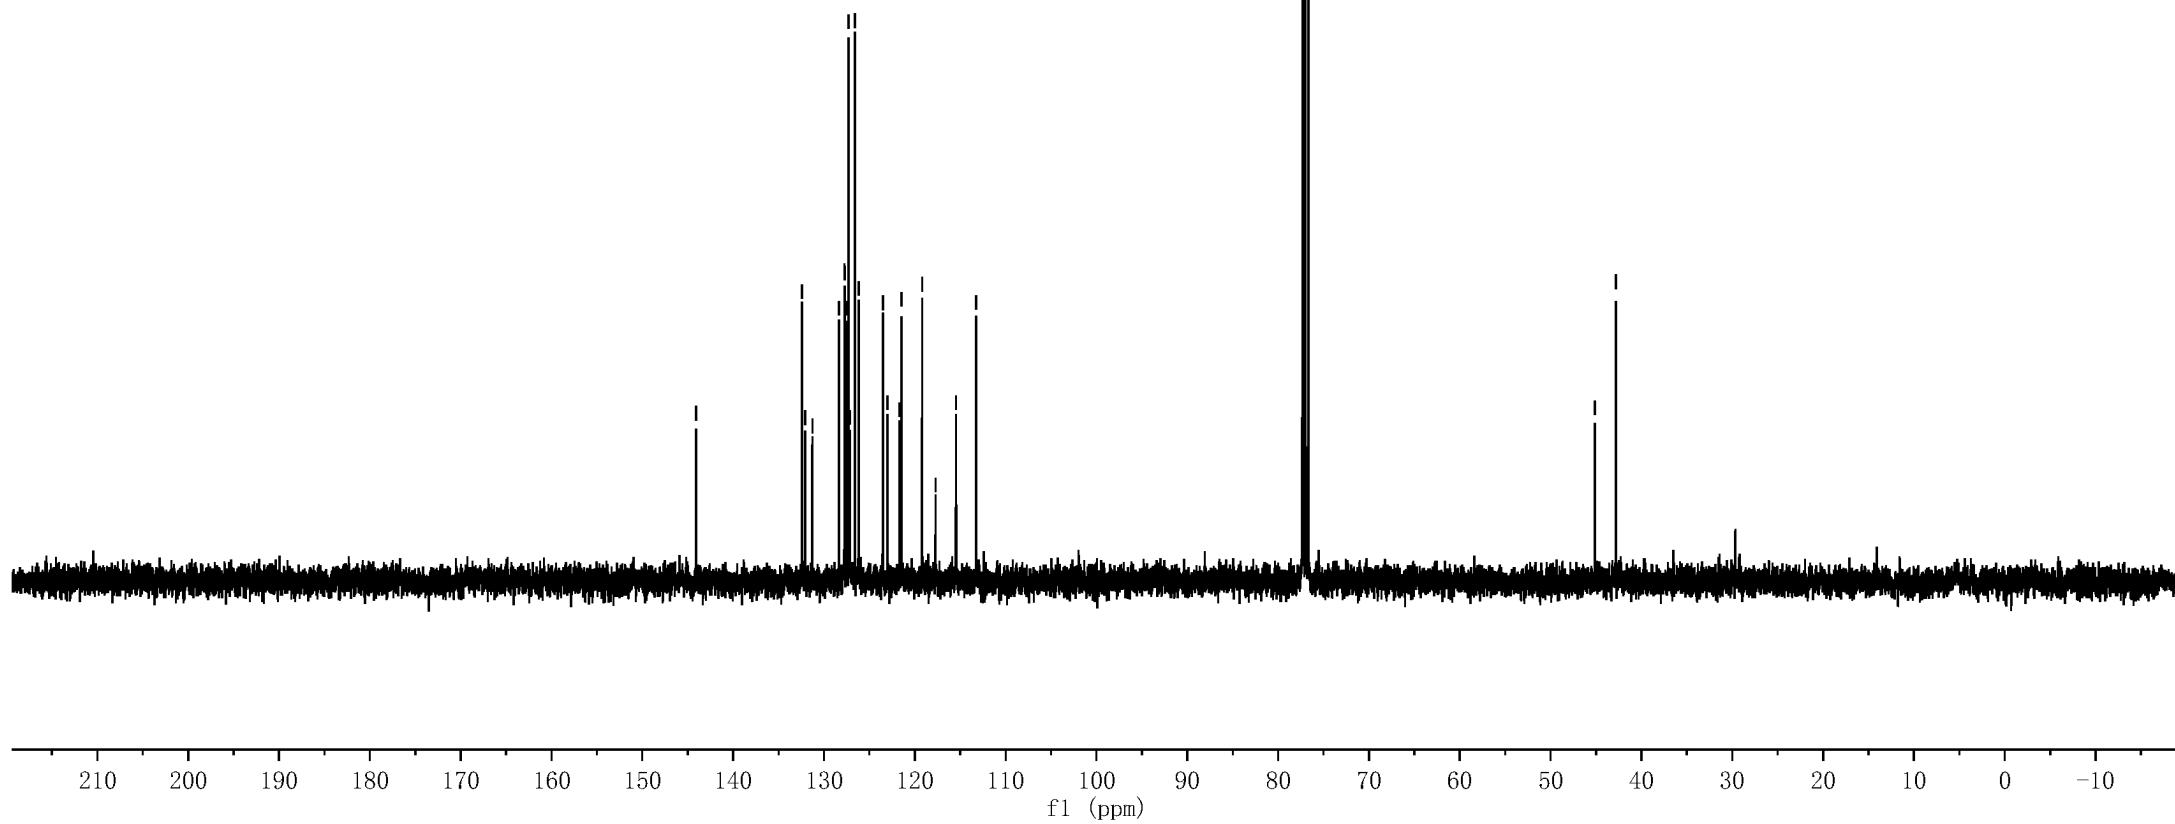

| Parameter                | Value               |
|--------------------------|---------------------|
| 1 Title                  | zyx-5-4-H           |
| 2 Origin                 | Bruker BioSpir GmbH |
| 3 Solvent                | CDCl3               |
| 4 Temperature            | 295.5               |
| 5 Number of Scans        | 12                  |
| 6 Acquisition Time       | 3.9846              |
| 7 Acquisition Date       | 2022-04-25T15:32:31 |
| 8 Spectrometer Frequency | 399.93              |
| 9 Spectral Width         | 8223.7              |

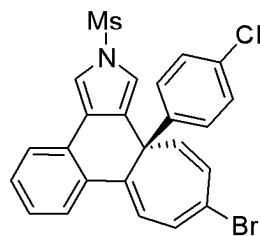

2ad

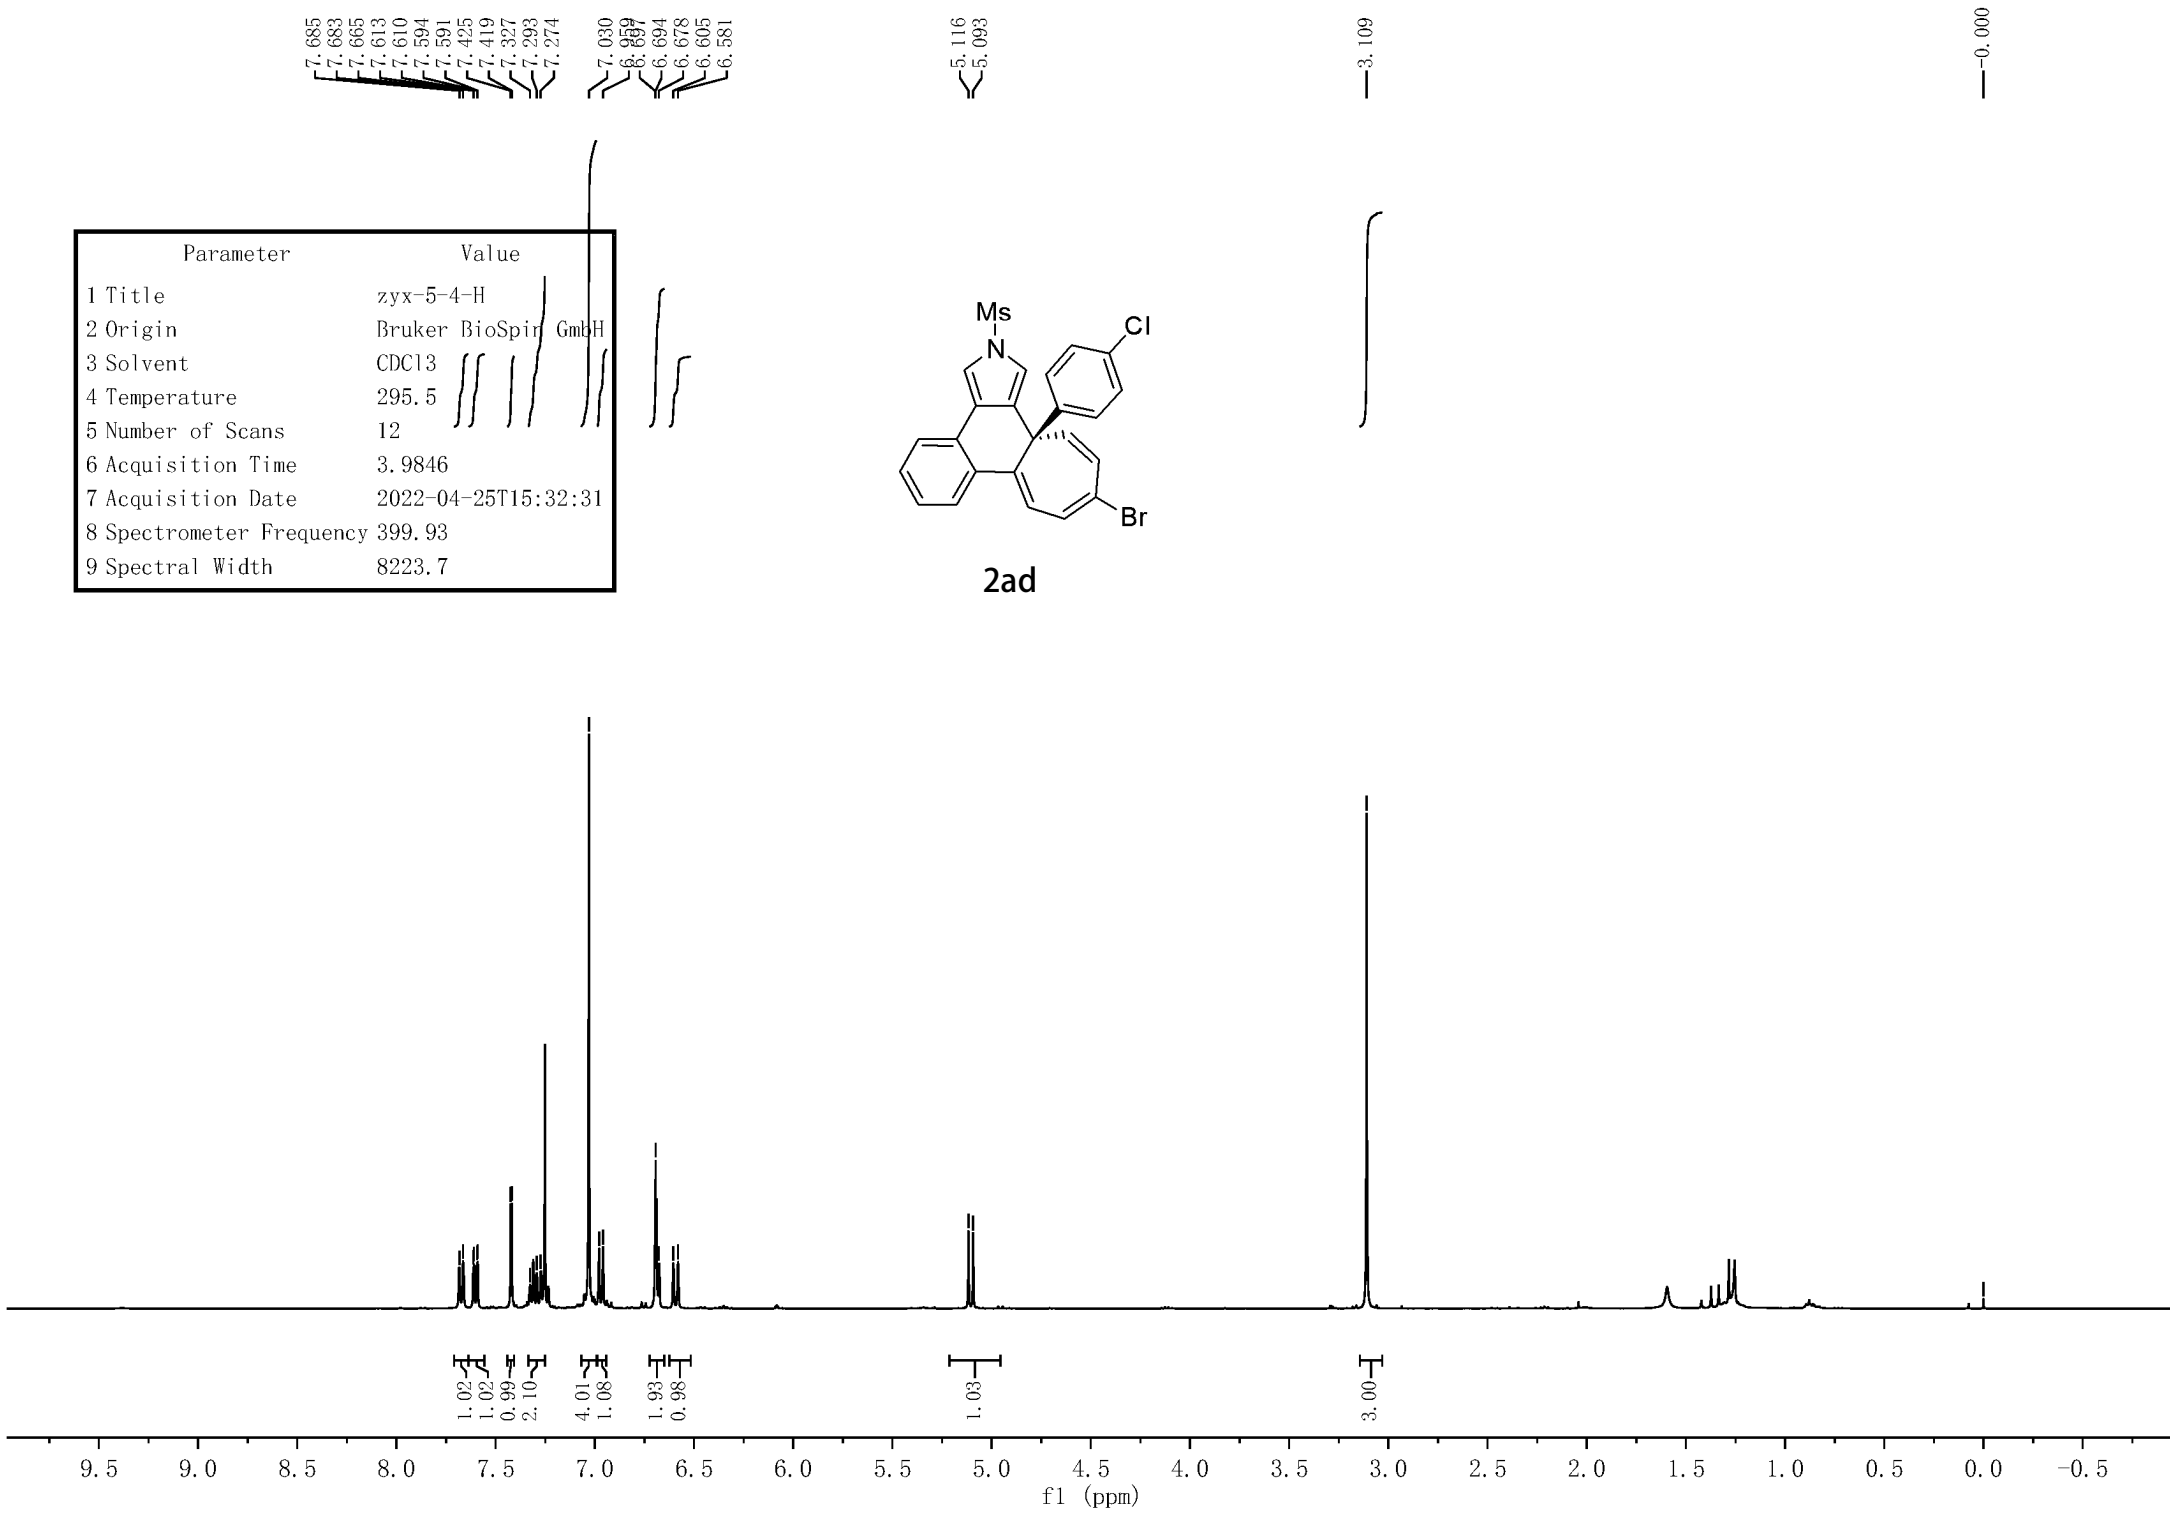

| Parameter                | Value               |
|--------------------------|---------------------|
| 1 Title                  | zyx-5-4-C           |
| 2 Origin                 | Bruker BioSpin GmbH |
| 3 Solvent                | CDC13               |
| 4 Temperature            | 295.8               |
| 5 Number of Scans        | 84                  |
| 6 Acquisition Time       | 1.3631              |
| 7 Acquisition Date       | 2022-04-25T15:34:21 |
| 8 Spectrometer Frequency | 100.56              |
| 9 Spectral Width         | 24038.5             |



2ad

142.94  
132.77  
131.78  
131.65  
130.95  
128.61  
128.02  
127.89  
127.58  
127.50  
127.21  
123.62  
123.30  
121.64  
121.38  
119.41  
119.17  
116.79  
113.45

77.39  
77.07  
76.76

45.15  
42.95

132.77  
131.78  
131.65  
130.95  
128.61  
128.02  
127.89  
127.58  
127.50  
127.21  
123.62  
123.30  
121.64  
121.38  
119.41  
119.17  
116.79  
113.45

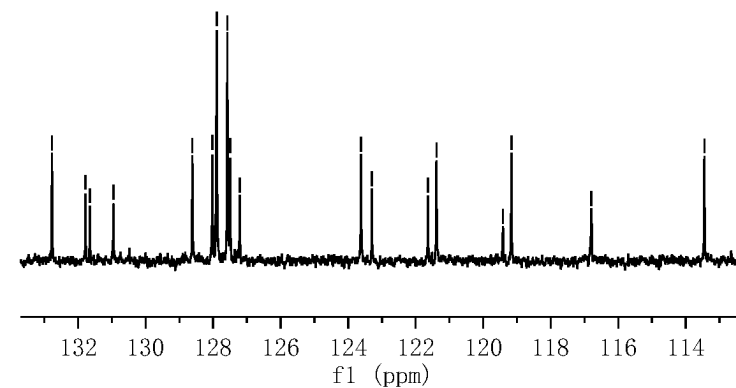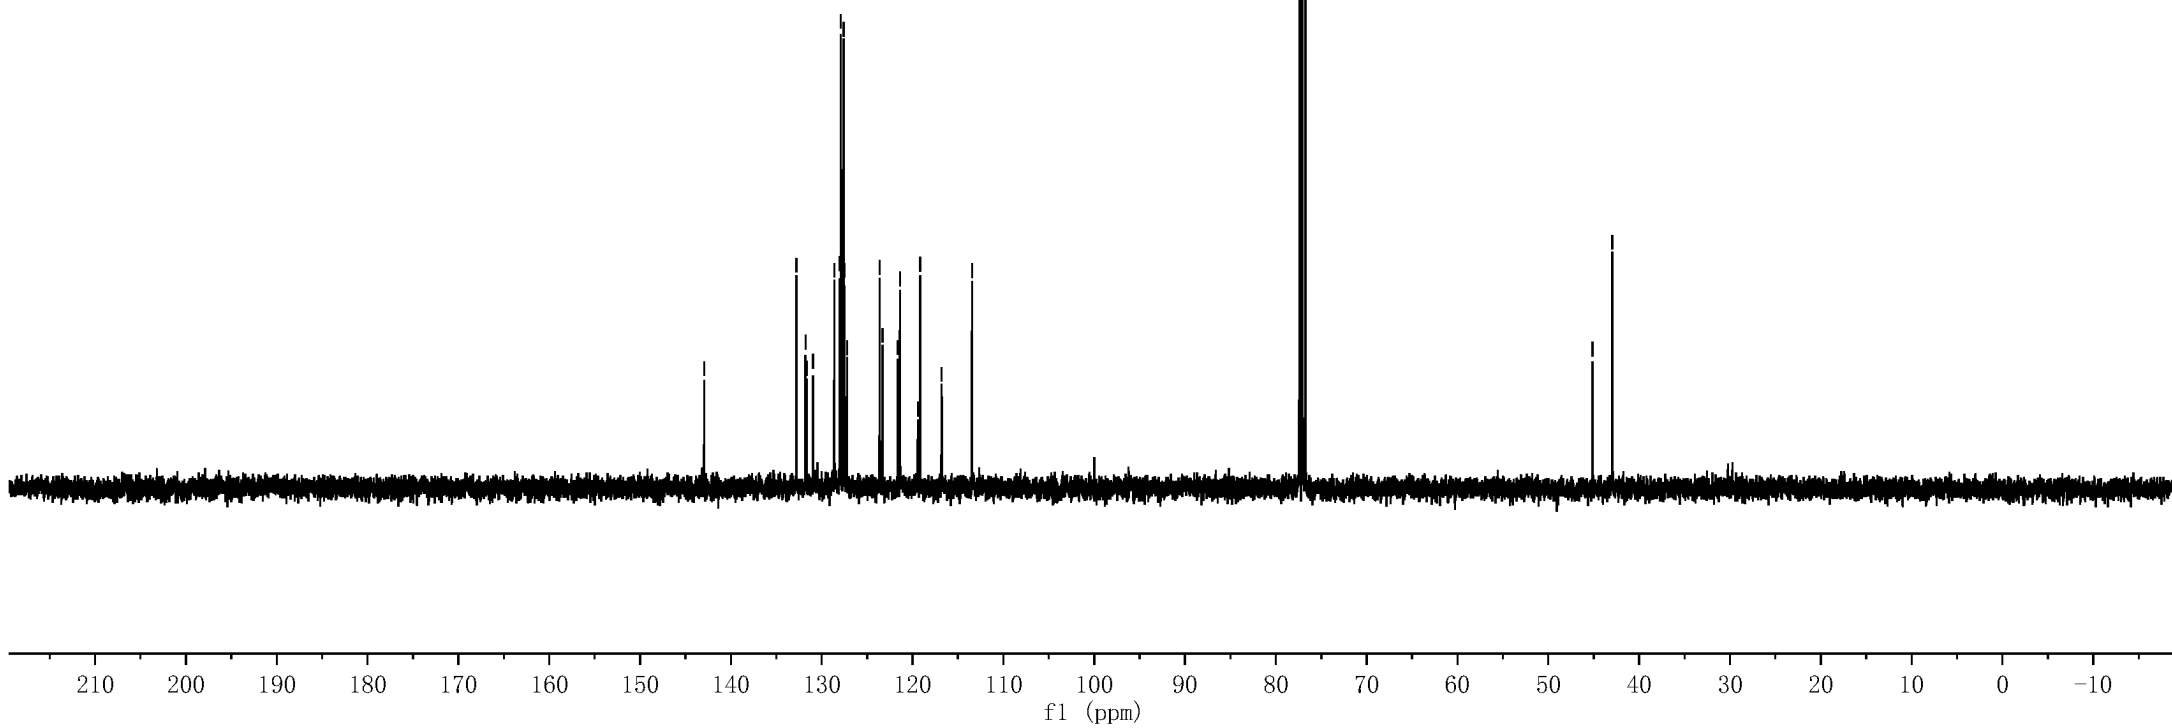

| Parameter                | Value               |
|--------------------------|---------------------|
| 1 Title                  | ZYX-13-153--H       |
| 2 Origin                 | Broker BioSpin GmbH |
| 3 Solvent                | ClCl3               |
| 4 Temperature            | 297.9               |
| 5 Number of Scans        | 7                   |
| 6 Acquisition Time       | 3.1719              |
| 7 Acquisition Date       | 2024-07-04T16:38:40 |
| 8 Spectrometer Frequency | 500.17              |
| 9 Spectral Width         | 10330.6             |

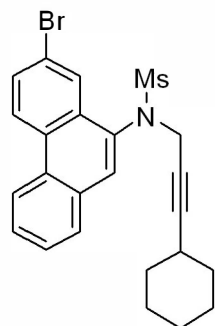

2ae'

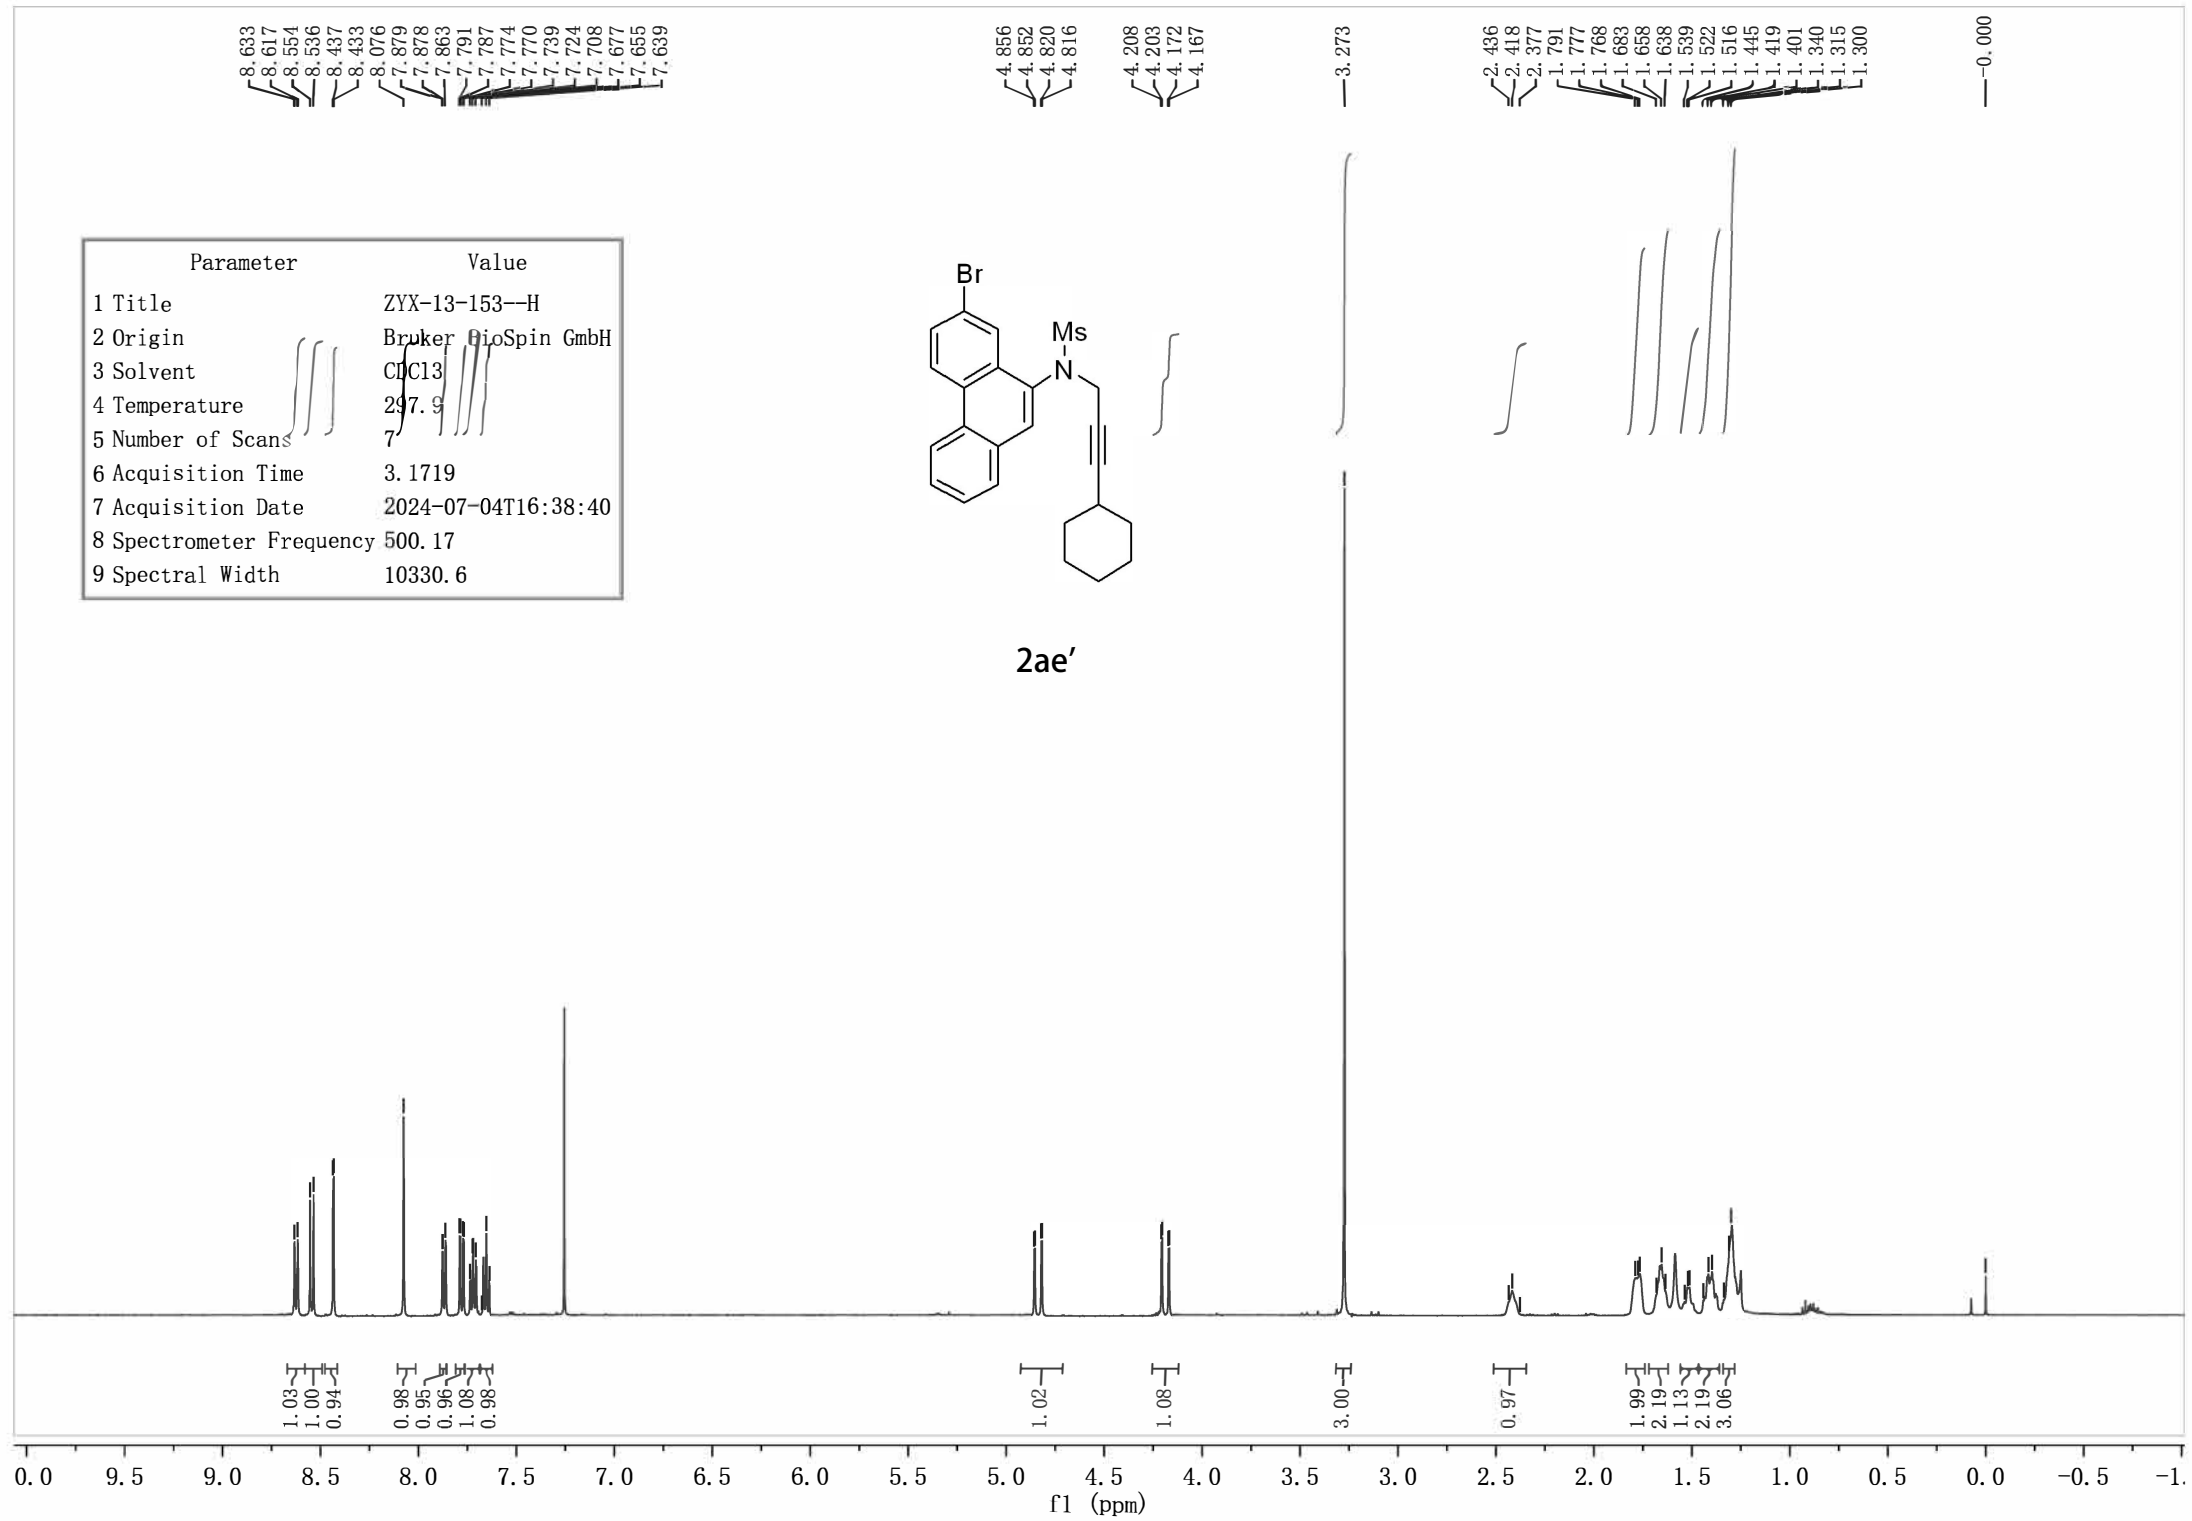

| Parameter                | Value               |
|--------------------------|---------------------|
| 1 Title                  | zyx-13-153          |
| 2 Origin                 |                     |
| 3 Solvent                | CDC13               |
| 4 Temperature            | 299.2               |
| 5 Number of Scans        | 4500                |
| 6 Acquisition Time       | 1.0000              |
| 7 Acquisition Date       | 2024-07-05T07:18:27 |
| 8 Spectrometer Frequency | 100.55              |
| 9 Spectral Width         | 26041.0             |

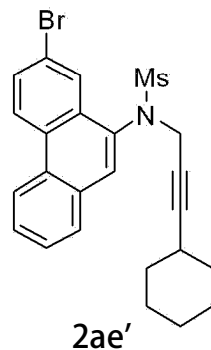

133.85  
132.17  
130.91  
130.66  
130.33  
130.17  
129.01  
128.83  
128.24  
127.43  
126.78  
124.65  
122.62  
122.02

91.22

77.32  
77.00  
76.68  
74.58

41.95  
39.73

32.44  
28.98  
25.74  
24.74

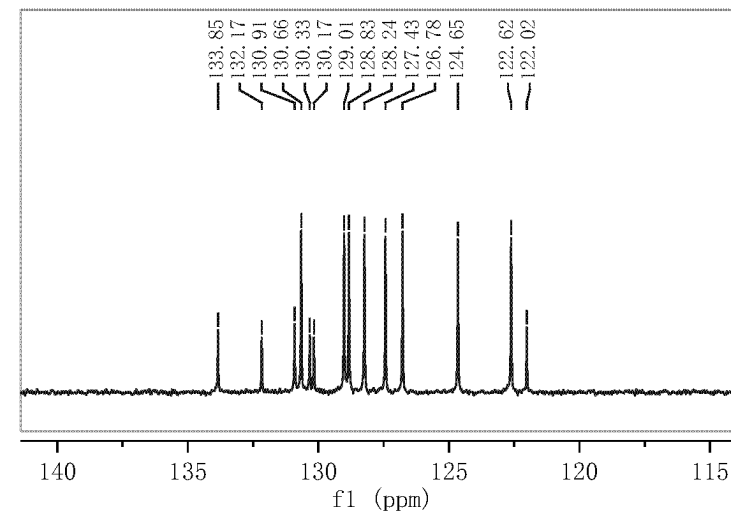

220 210 200 190 180 170 160 150 140 130 120 110 100 90 80 70 60 50 40 30 20 10 0 -10 -20

f1 (ppm)

130.65  
129.01  
128.82  
128.23  
127.43  
126.77  
124.65  
122.61

41.95  
39.72

32.44  
28.98  
25.74  
24.74

| Parameter                | Value               |
|--------------------------|---------------------|
| 1 Title                  | zyx-13-153          |
| 2 Origin                 |                     |
| 3 Solvent                | CDC13               |
| 4 Temperature            | 298.8               |
| 5 Number of Scans        | 1000                |
| 6 Acquisition Time       | 1.0001              |
| 7 Acquisition Date       | 2024-07-05T08:12:17 |
| 8 Spectrometer Frequency | 100.55              |
| 9 Spectral Width         | 18028.0             |

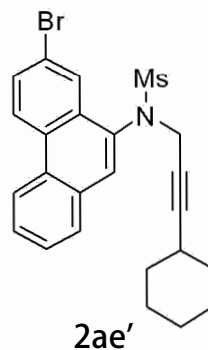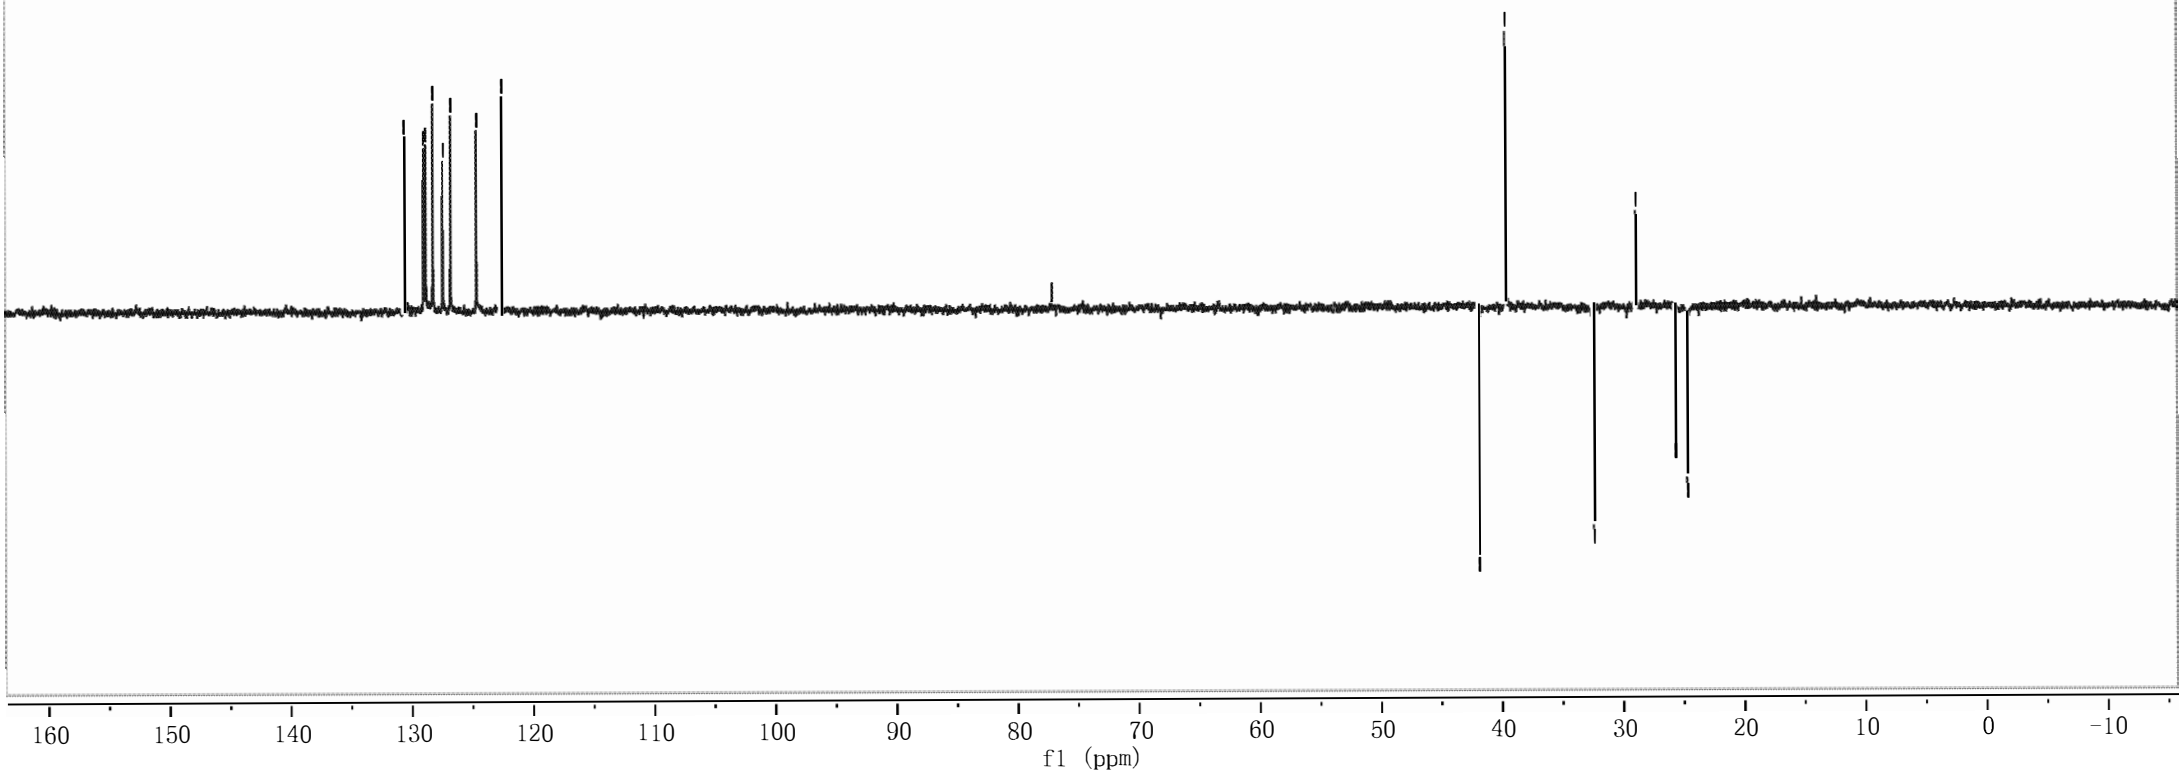

| Parameter                | Value               |
|--------------------------|---------------------|
| 1 Title                  | lct-15-155-H        |
| 2 Origin                 | Bruker BioSpin GmbH |
| 3 Solvent                | CDCl3               |
| 4 Temperature            | 298.0               |
| 5 Number of Scans        | 10                  |
| 6 Acquisition Time       | 4.0894              |
| 7 Acquisition Date       | 2024-07-11T09:35:53 |
| 8 Spectrometer Frequency | 400.13              |
| 9 Spectral Width         | 8012.8              |

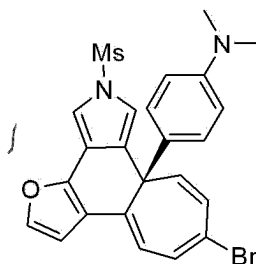

2af

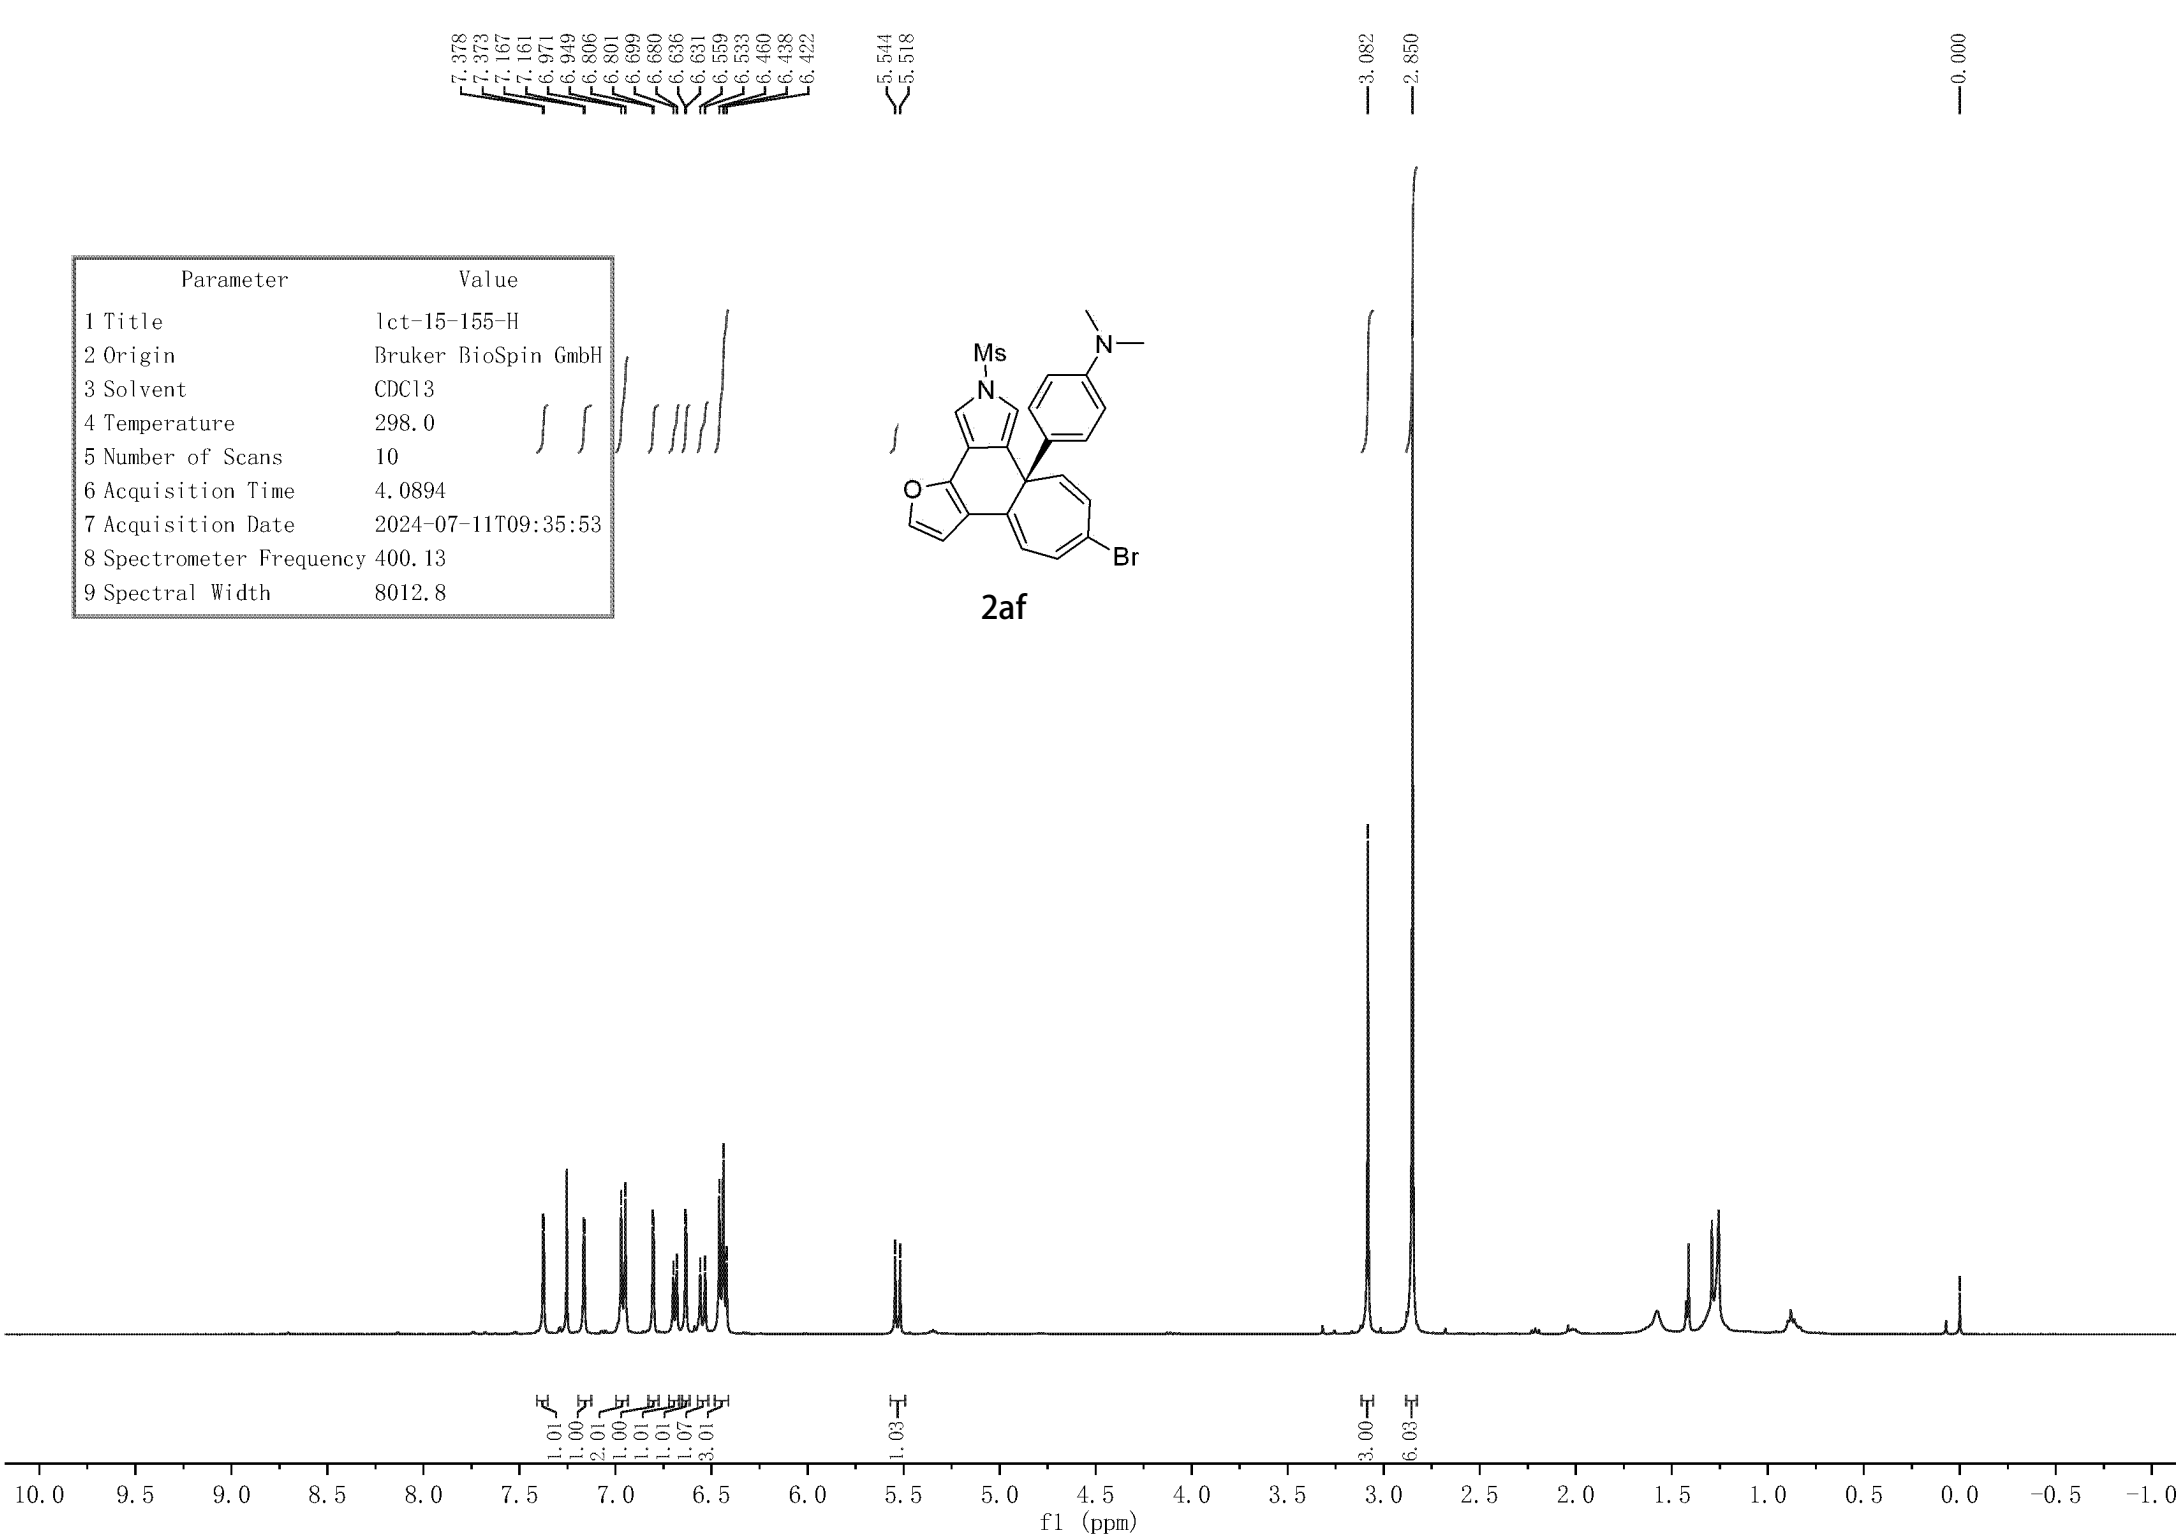

| Parameter                | Value               |
|--------------------------|---------------------|
| 1 Title                  | lct-15-155-C        |
| 2 Origin                 | Bruker BioSpin GmbH |
| 3 Solvent                | CDC13               |
| 4 Temperature            | 300.0               |
| 5 Number of Scans        | 100                 |
| 6 Acquisition Time       | 1.3631              |
| 7 Acquisition Date       | 2024-07-11T09:38:48 |
| 8 Spectrometer Frequency | 100.61              |
| 9 Spectral Width         | 24038.5             |

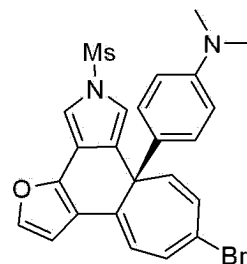

2af

148.94  
145.78  
142.88  
136.14  
132.46  
132.30  
131.76  
128.96  
127.61  
126.37  
122.08  
120.60  
119.22  
118.52  
115.10  
111.82  
110.21  
107.78

77.32  
77.00  
76.68

48.56  
42.71  
40.47

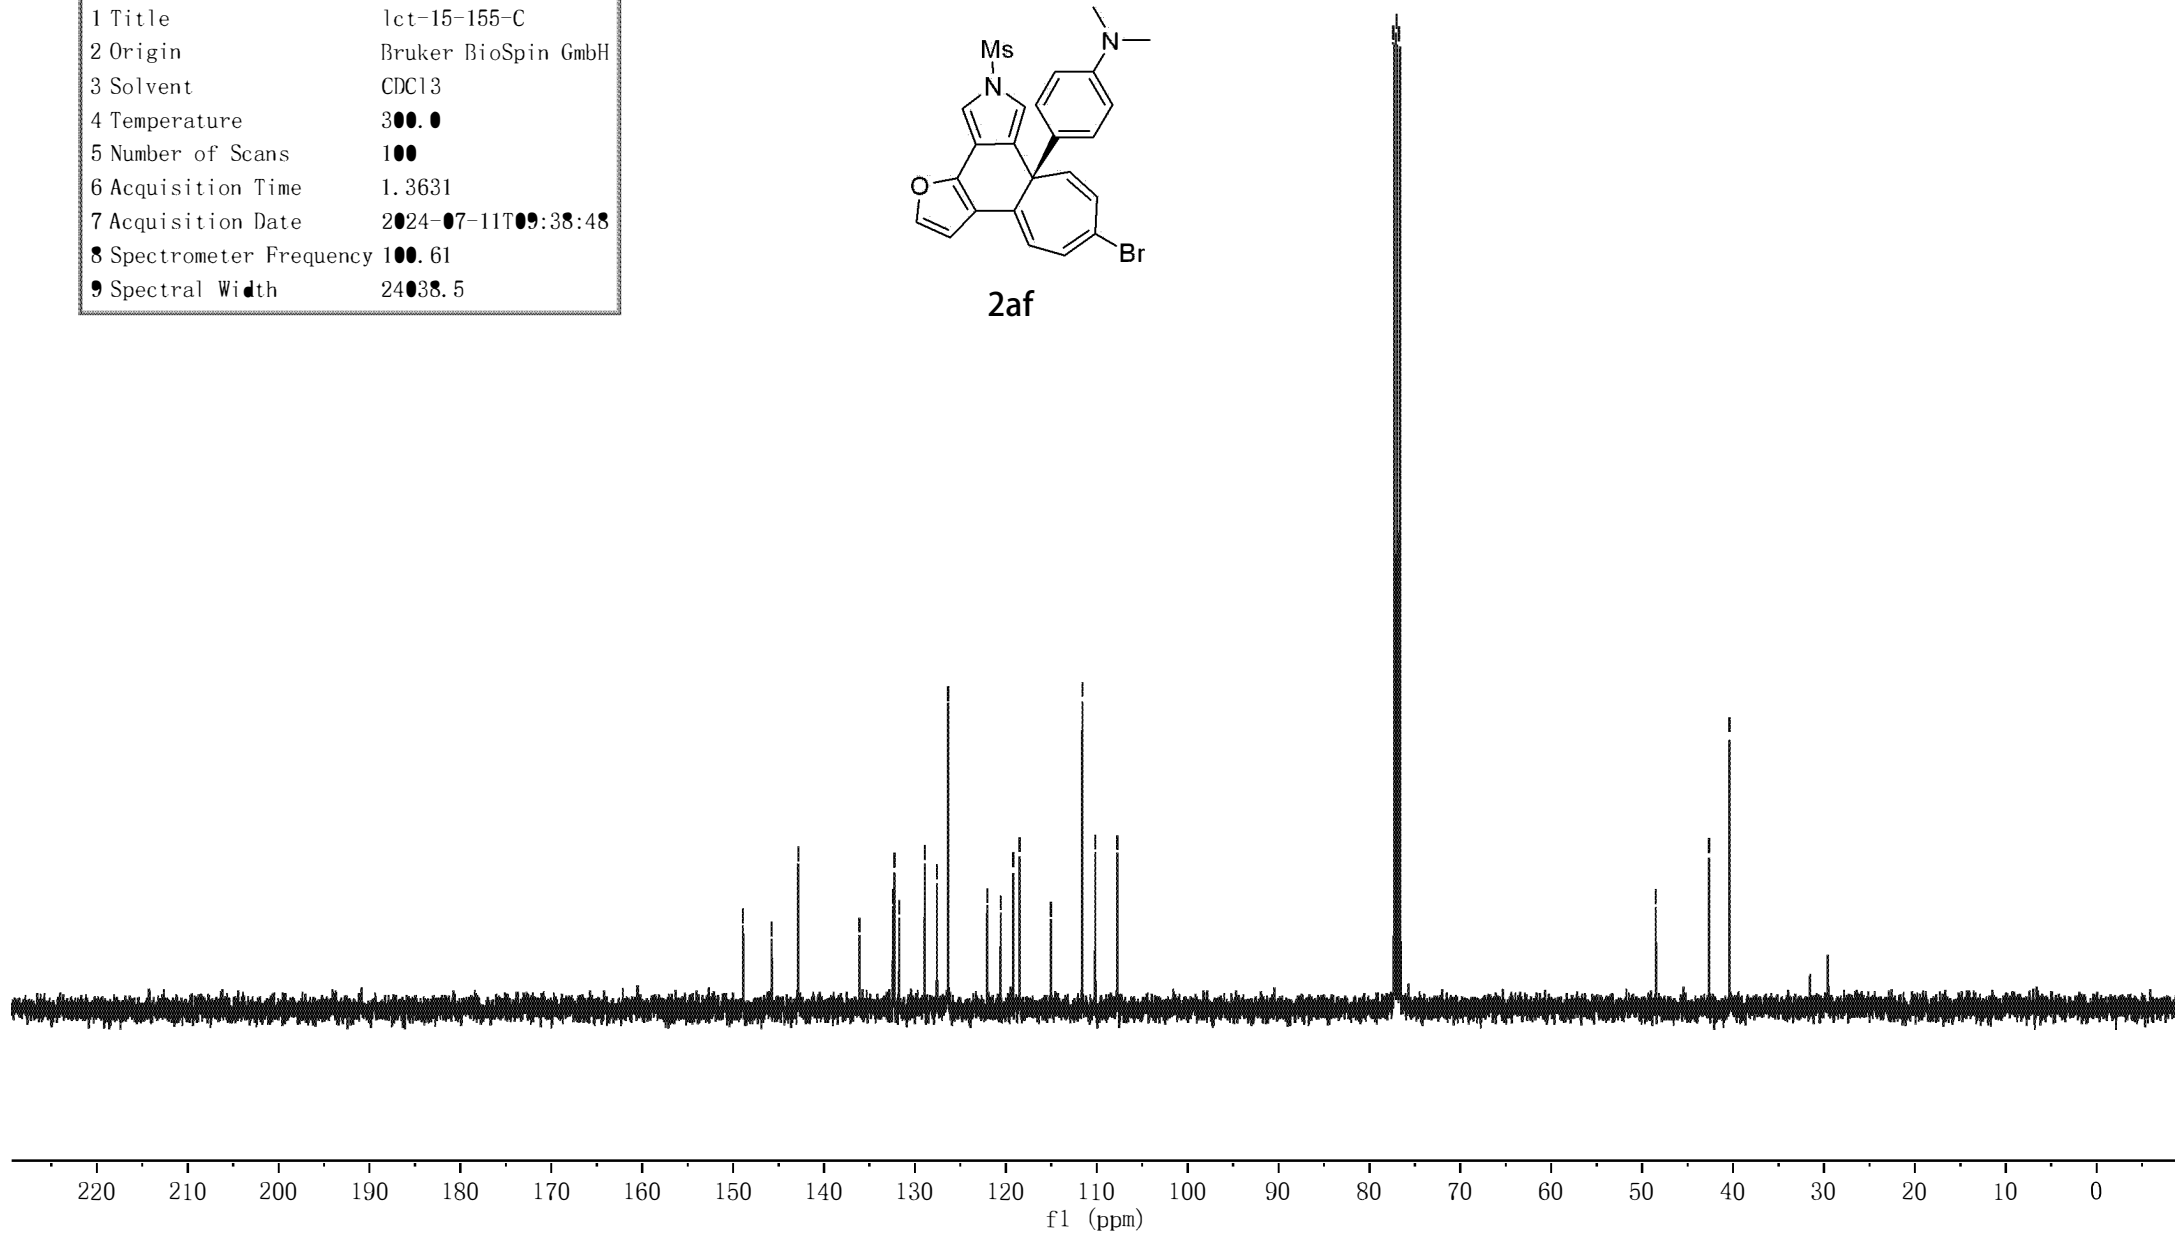



| Parameter                | Value               |
|--------------------------|---------------------|
| 1 Title                  | lct-15-155-dept     |
| 2 Origin                 | Bruker BioSpin GmbH |
| 3 Solvent                | CDCl3               |
| 4 Temperature            | 300.0               |
| 5 Number of Scans        | 21                  |
| 6 Acquisition Time       | 1.3631              |
| 7 Acquisition Date       | 2024-07-11T09:44:04 |
| 8 Spectrometer Frequency | 100.61              |
| 9 Spectral Width         | 24038.5             |

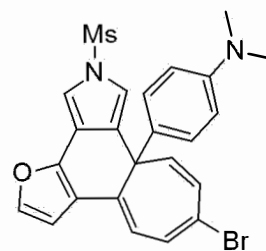

2af

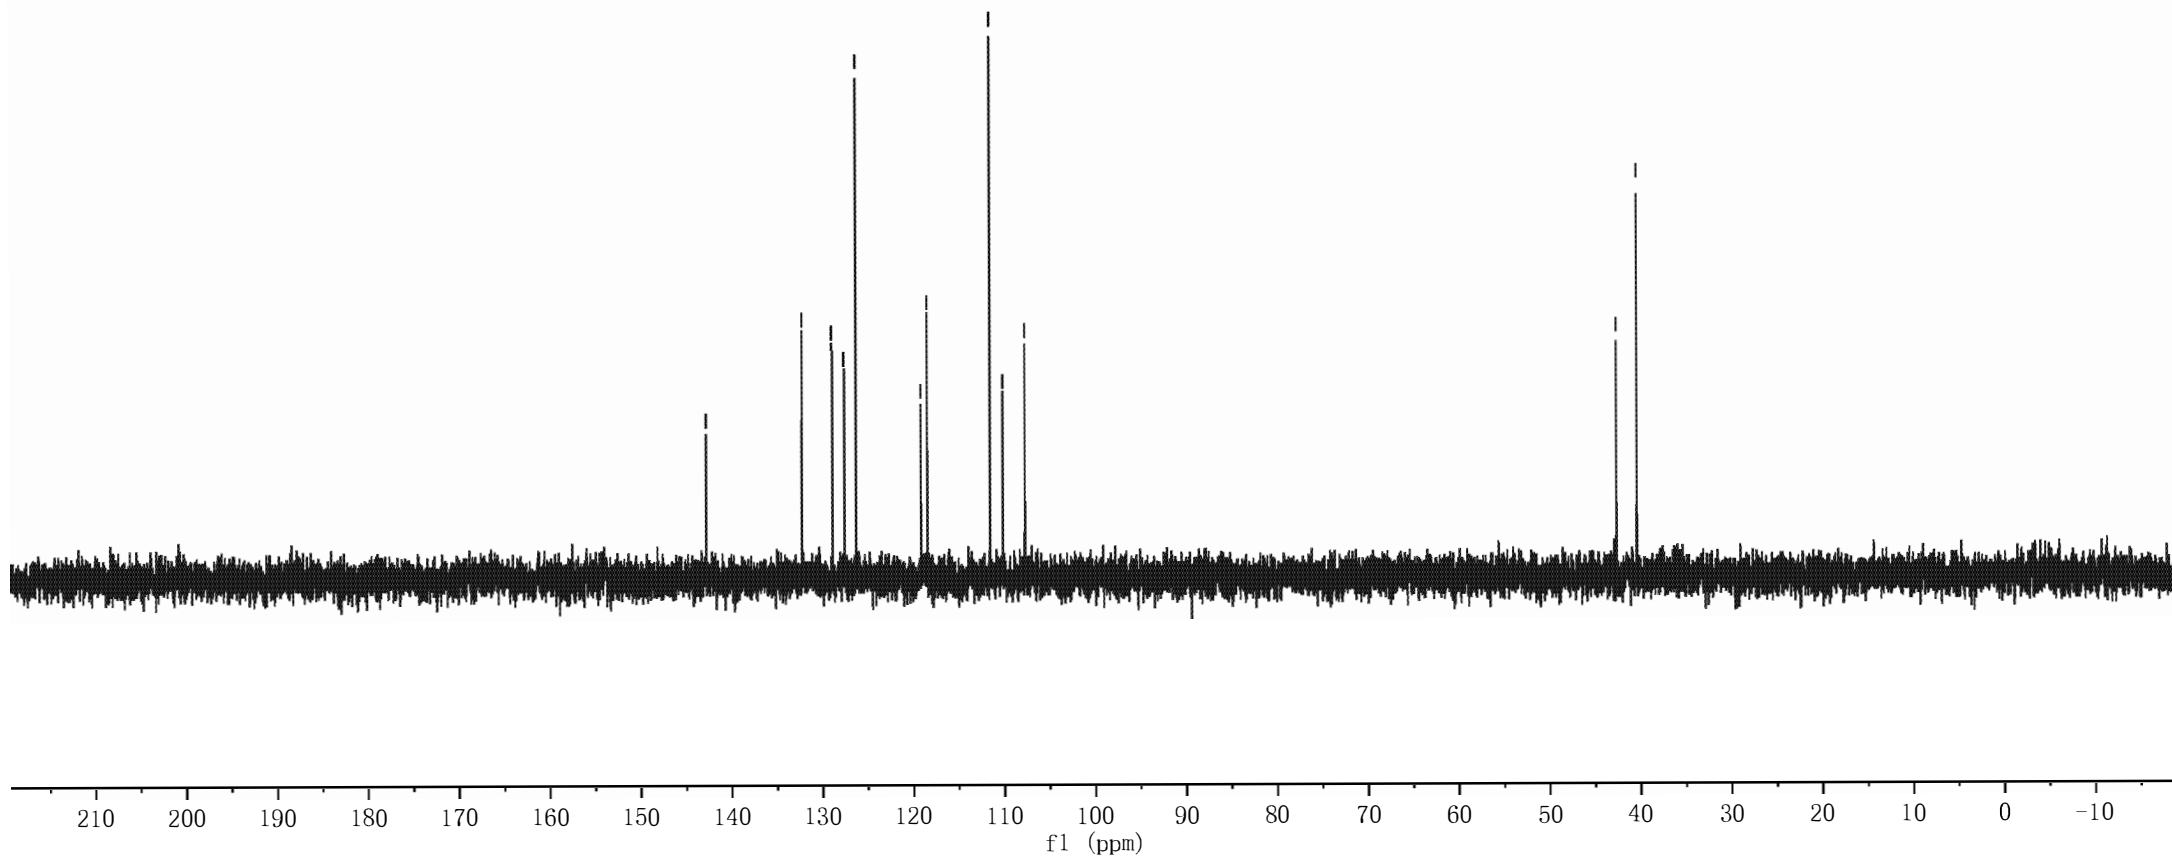

| Parameter                | Value               |
|--------------------------|---------------------|
| 1 Title                  | lct-15-114-H        |
| 2 Origin                 | Bruker BioSpin GmbH |
| 3 Solvent                | CDCl3               |
| 4 Temperature            | 298.0               |
| 5 Number of Scans        | 6                   |
| 6 Acquisition Time       | 4.0394              |
| 7 Acquisition Date       | 2024-06-29T21:40:09 |
| 8 Spectrometer Frequency | 400.13              |
| 9 Spectral Width         | 8012.8              |

7.262  
7.248  
7.153  
7.147  
7.136  
7.122  
6.947  
6.926  
6.772  
6.767  
6.560  
6.534  
6.439  
6.417

5.517  
5.492

3.056

2.831

-0.000

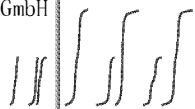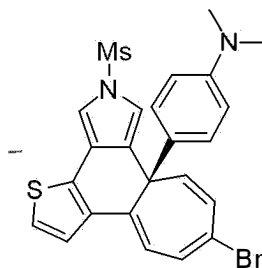

2ag

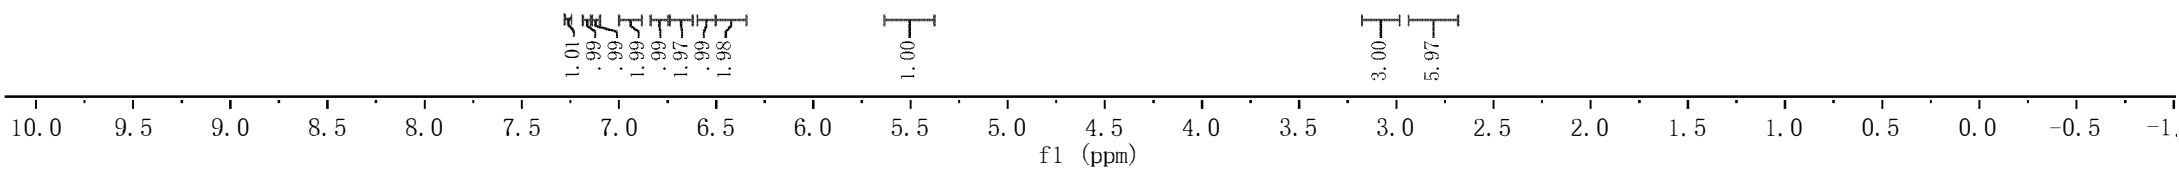

| Parameter                | Value               |
|--------------------------|---------------------|
| 1 Title                  | lct-15-114-C        |
| 2 Origin                 | Bruker BioSpin GmbH |
| 3 Solvent                | CDCl3               |
| 4 Temperature            | 300.0               |
| 5 Number of Scans        | 48                  |
| 6 Acquisition Time       | 1.3631              |
| 7 Acquisition Date       | 2024-06-29T21:41:22 |
| 8 Spectrometer Frequency | 100.61              |
| 9 Spectral Width         | 24038.5             |

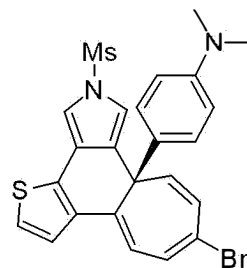

2ag

148.83  
135.29  
134.46  
132.62  
132.48  
130.20  
128.70  
127.56  
126.41  
125.23  
123.41  
122.66  
119.81  
118.78  
117.61  
111.53

77.32  
77.00  
76.68

47.82  
42.67  
40.43

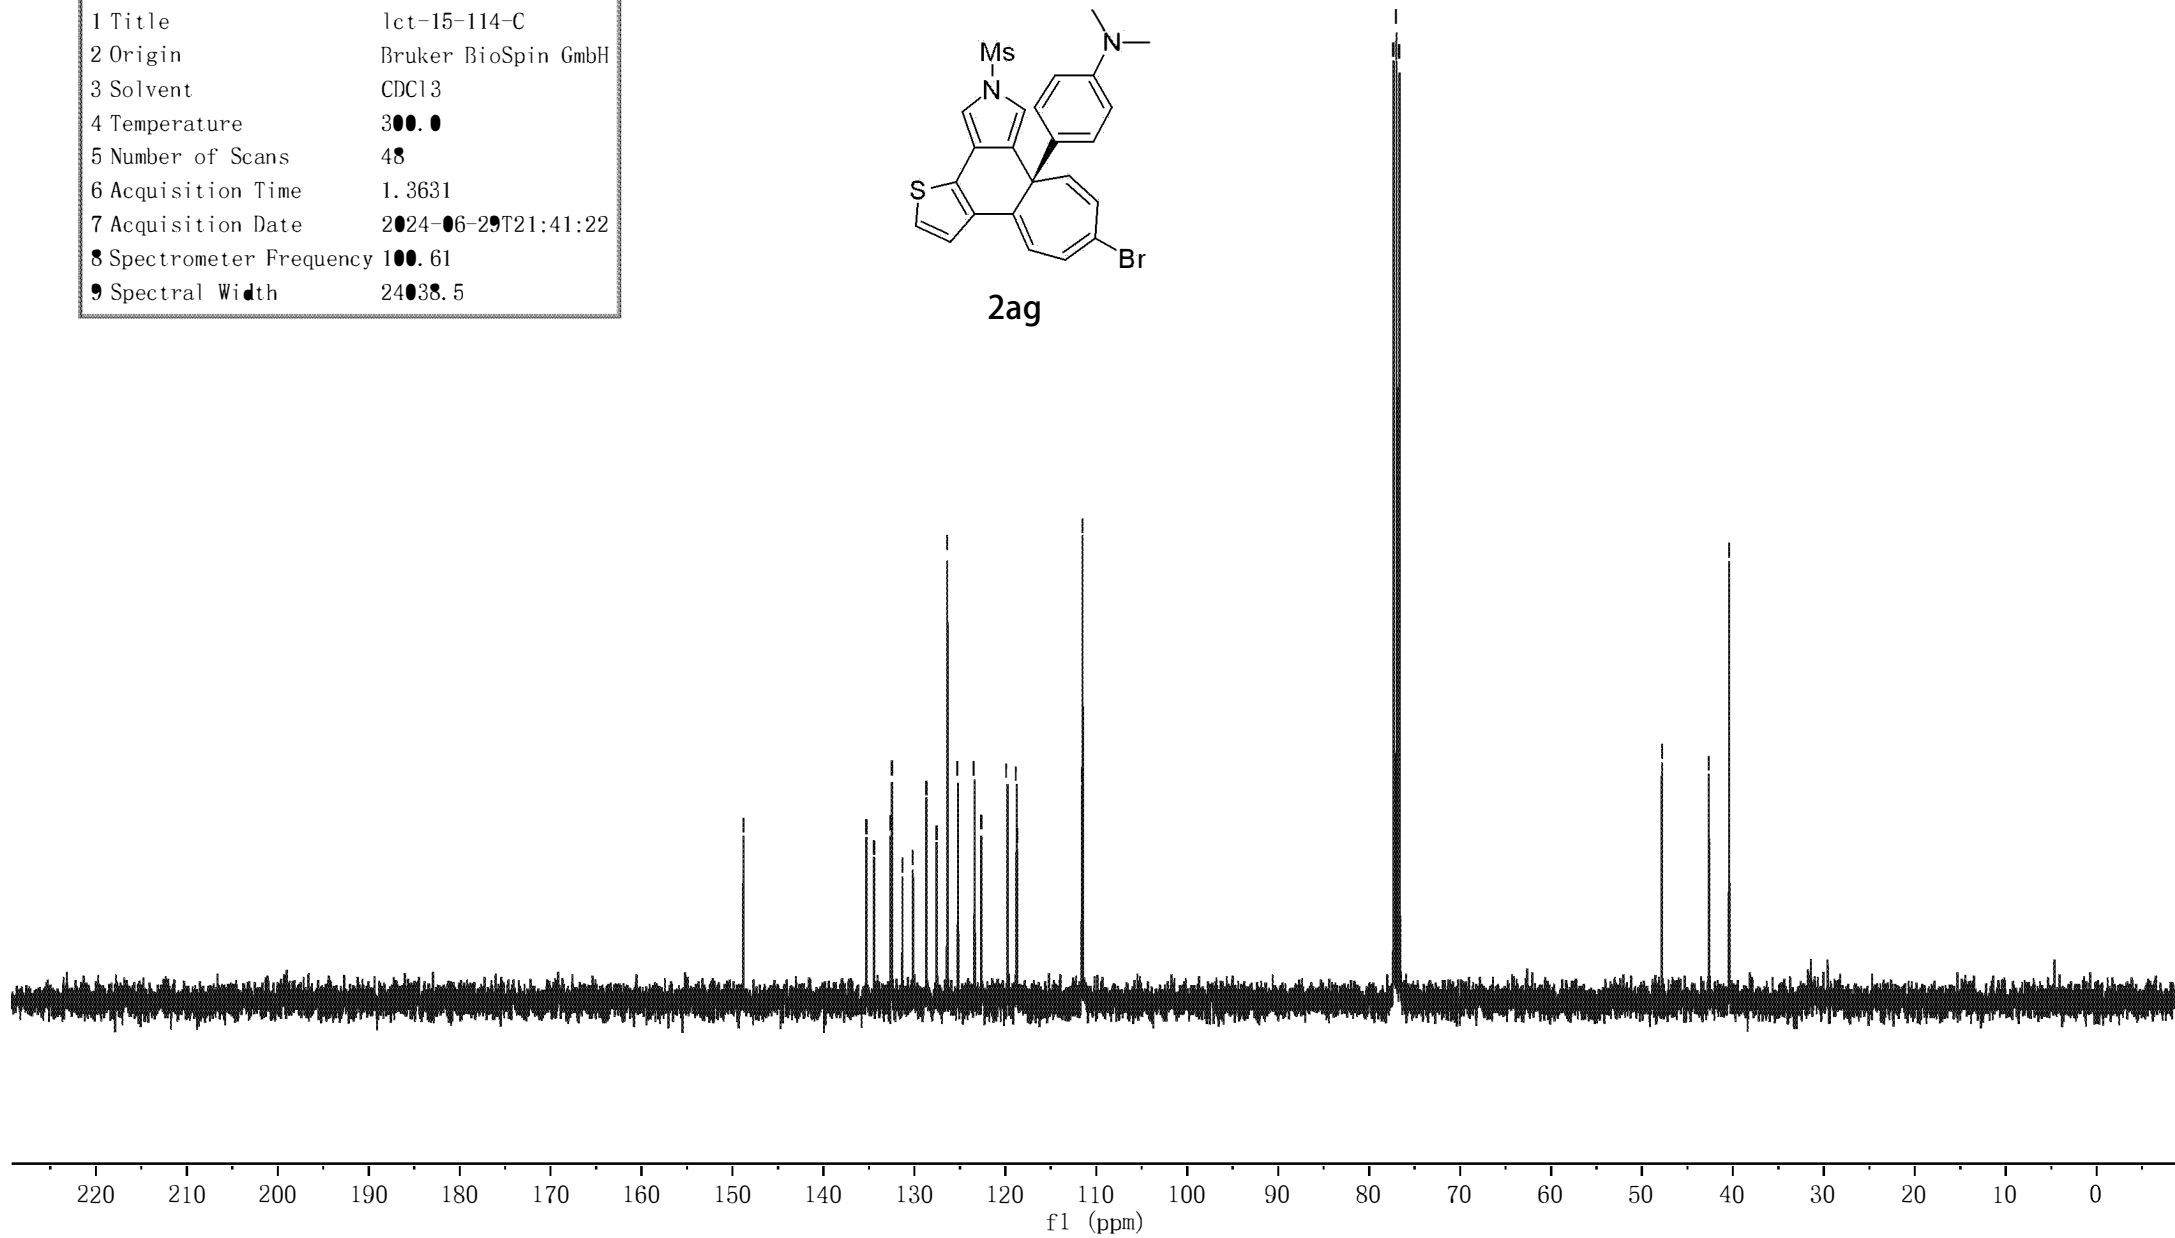

| Parameter                | Value               |
|--------------------------|---------------------|
| 1 Title                  | lct-15-114-dept     |
| 2 Origin                 | Bruker BioSpin GmbH |
| 3 Solvent                | CDCl3               |
| 4 Temperature            | 300.0               |
| 5 Number of Scans        | 22                  |
| 6 Acquisition Time       | 1.3631              |
| 7 Acquisition Date       | 2024-06-29T21:44:39 |
| 8 Spectrometer Frequency | 100.61              |
| 9 Spectral Width         | 24038.5             |

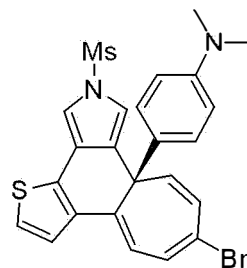

2ag

132.56  
128.80  
127.66  
126.51  
125.33  
123.51  
119.91  
118.89  
111.72  
111.64

42.77  
40.53

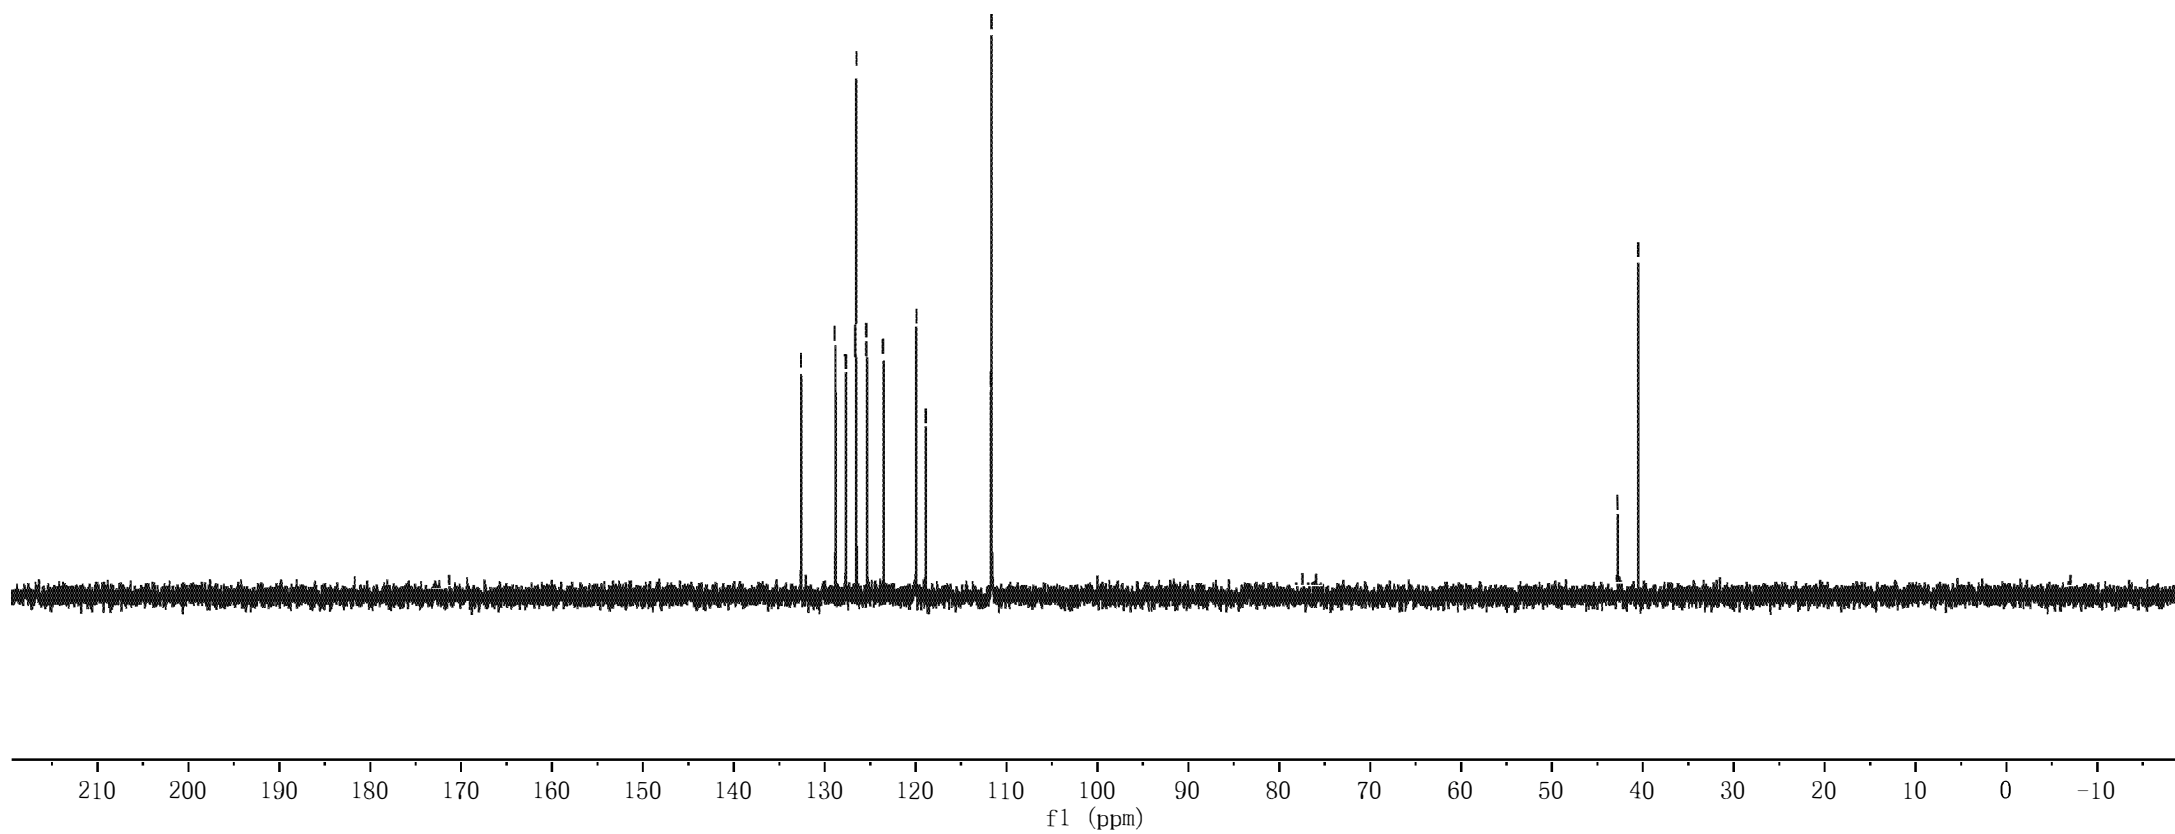

| Parameter                | Value               |
|--------------------------|---------------------|
| 1 Title                  | zyx-13-175-h        |
| 2 Origin                 | Bruker BioSpin GmbH |
| 3 Solvent                | CDCl3               |
| 4 Temperature            | 298.0               |
| 5 Number of Scans        | 4                   |
| 6 Acquisition Time       | 4.0394              |
| 7 Acquisition Date       | 2024-07-02T10:06:41 |
| 8 Spectrometer Frequency | 400.13              |
| 9 Spectral Width         | 8012.8              |

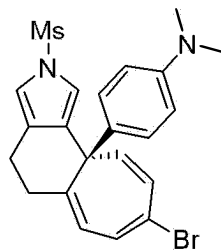

2ah

6.950  
6.928  
6.808  
6.495  
6.490  
6.473  
6.407  
6.127

4.799  
4.775

3.004  
2.868  
2.794  
2.782  
2.758  
2.706  
2.683  
2.649  
2.465  
2.440  
2.416

-0.000

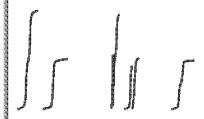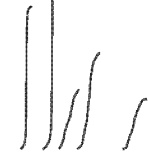

2.07  
1.06  
1.15  
1.99  
0.91  
1.07  
1.02

1.01

3.00  
6.03  
1.25  
2.03  
1.05

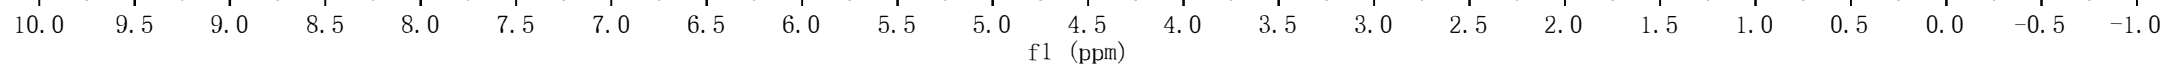

| Parameter                | Value               |
|--------------------------|---------------------|
| 1 Title                  | zyx-13-175-c        |
| 2 Origin                 | Bruker BioSpin GmbH |
| 3 Solvent                | CDC13               |
| 4 Temperature            | 300.0               |
| 5 Number of Scans        | 29                  |
| 6 Acquisition Time       | 1.3631              |
| 7 Acquisition Date       | 2024-07-02T10:07:56 |
| 8 Spectrometer Frequency | 100.61              |
| 9 Spectral Width         | 24038.5             |

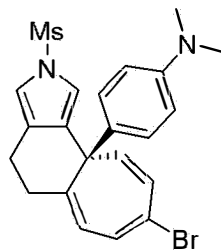

2ah

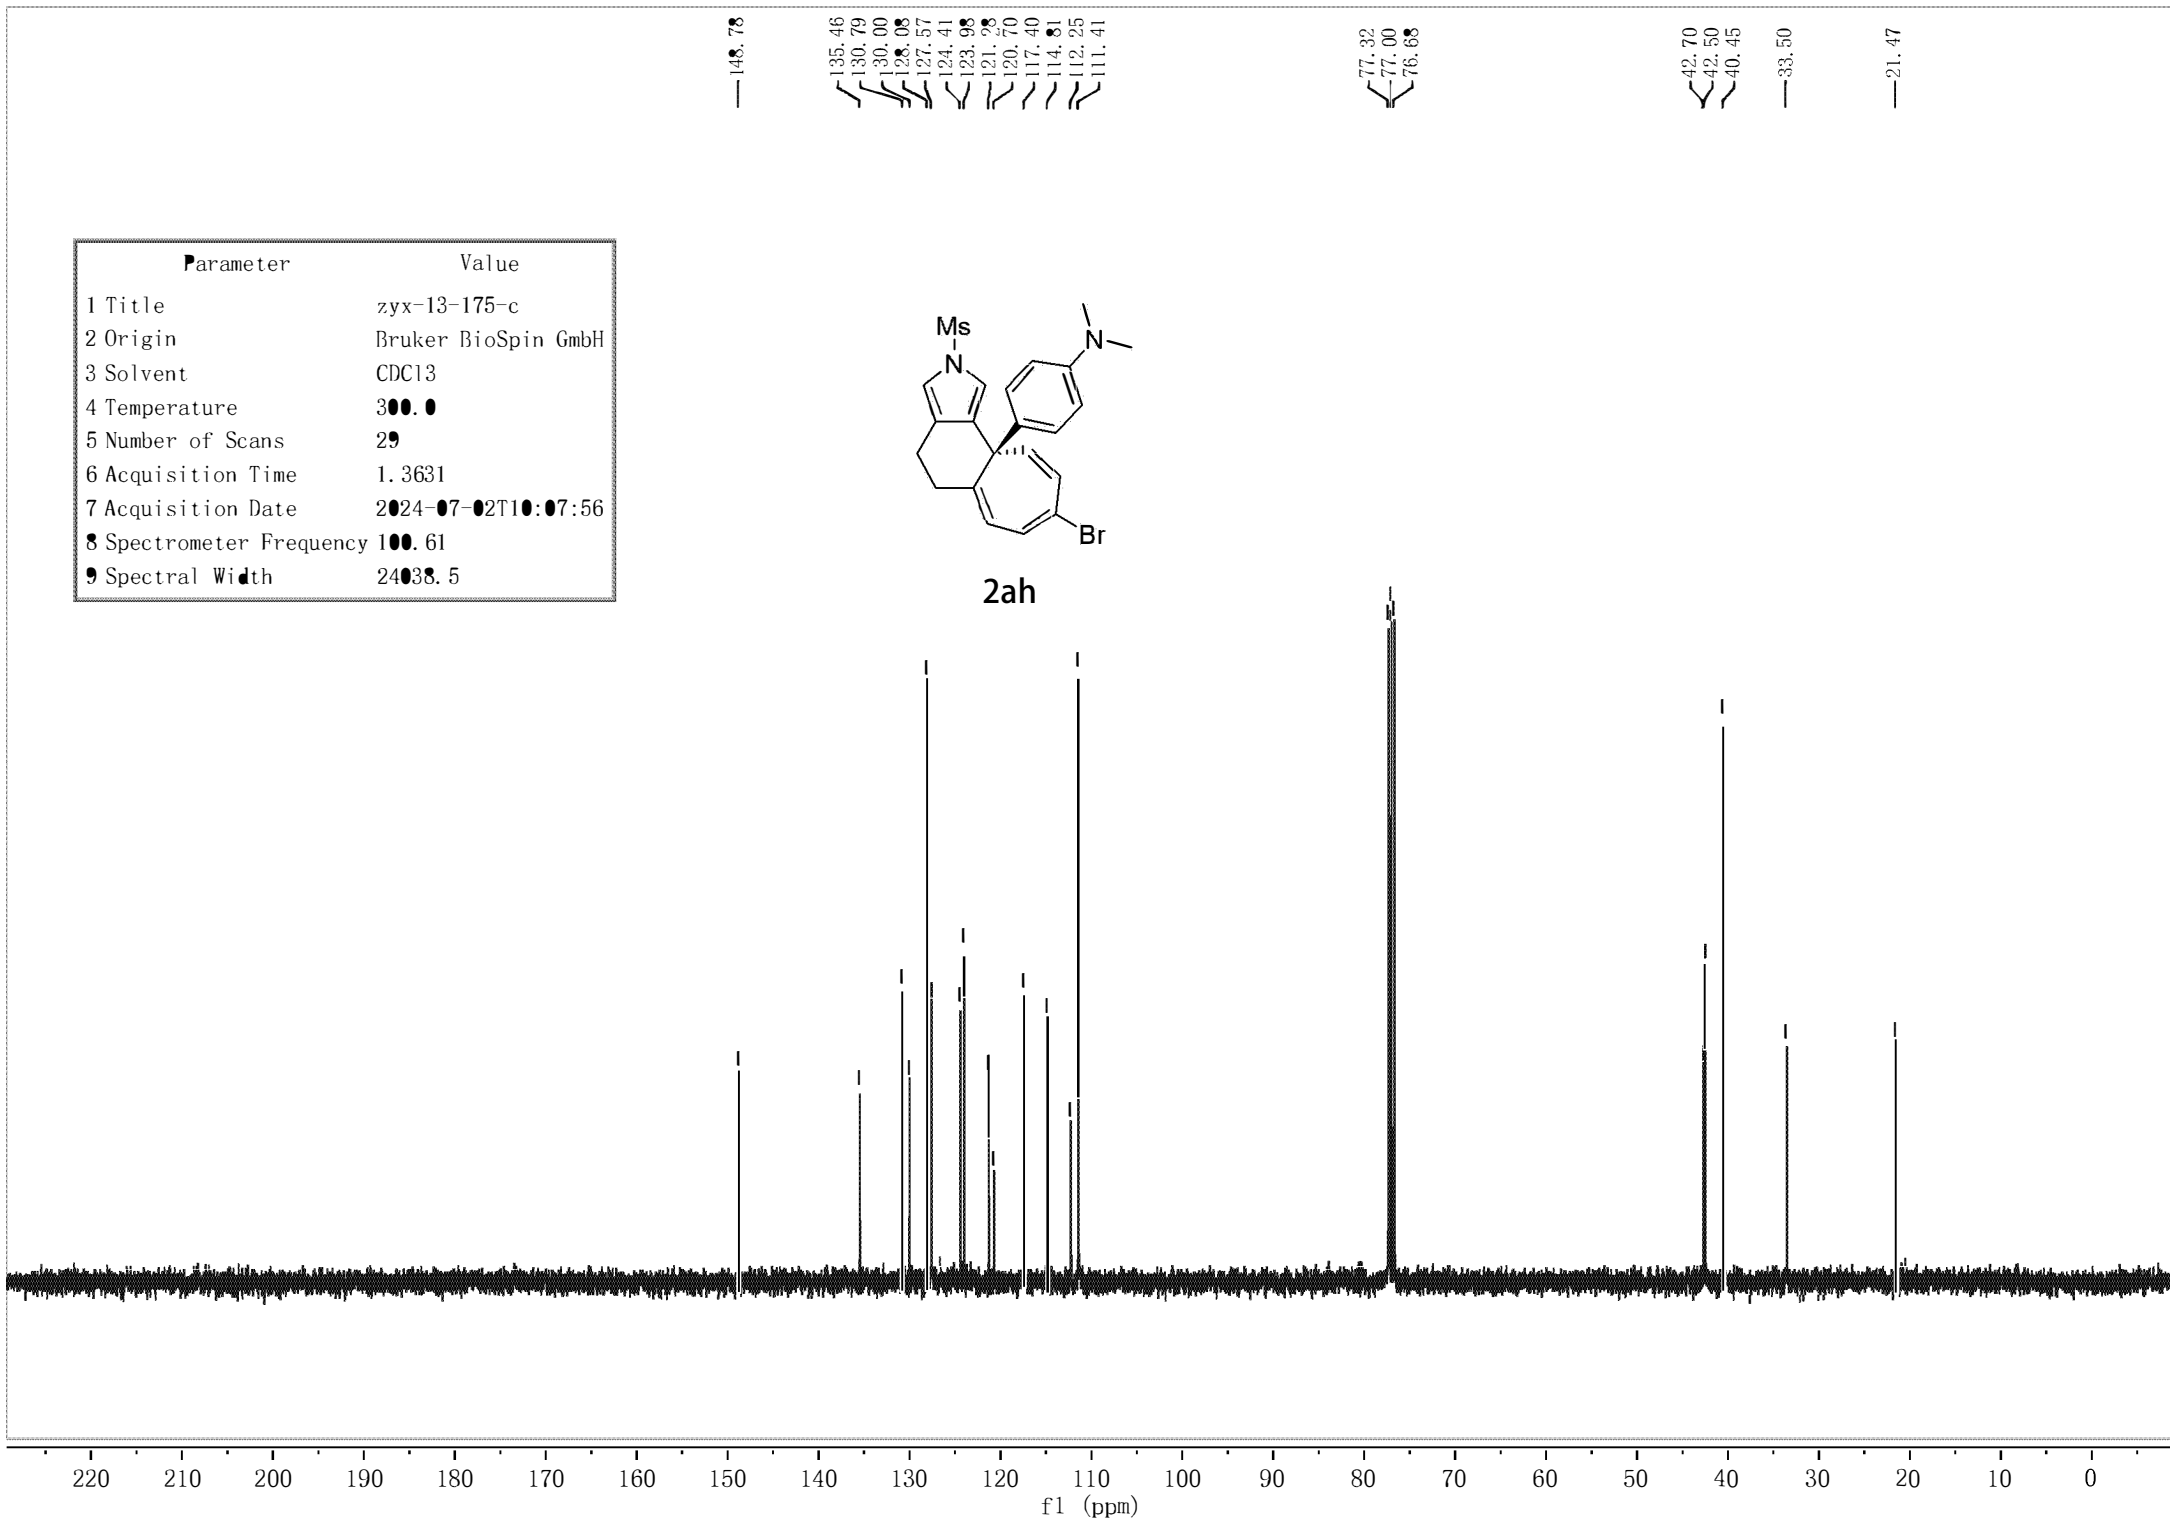

| Parameter                | Value               |
|--------------------------|---------------------|
| 1 Title                  | zyx-13-175-dept     |
| 2 Origin                 | Bruker BioSpin GmbH |
| 3 Solvent                | CDCl3               |
| 4 Temperature            | 300.0               |
| 5 Number of Scans        | 31                  |
| 6 Acquisition Time       | 1.3631              |
| 7 Acquisition Date       | 2024-07-02T10:09:55 |
| 8 Spectrometer Frequency | 100.61              |
| 9 Spectral Width         | 24038.5             |

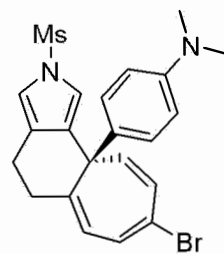

2ah

130.79  
128.08  
127.57  
123.98  
117.40  
114.81  
112.25  
111.41

42.50  
40.45  
33.50  
21.47

210 200 190 180 170 160 150 140 130 120 110 100 90 80 70 60 50 40 30 20 10 0 -10  
f1 (ppm)

| Parameter                | Value               |
|--------------------------|---------------------|
| 1 Title                  | zyx-13-218-h        |
| 2 Origin                 | Bruker BioSpin GmbH |
| 3 Solvent                | CDCl3               |
| 4 Temperature            | 298.6               |
| 5 Number of Scans        | 10                  |
| 6 Acquisition Time       | 3.1719              |
| 7 Acquisition Date       | 2024-07-19T15:38:17 |
| 8 Spectrometer Frequency | 500.17              |
| 9 Spectral Width         | 10330.6             |

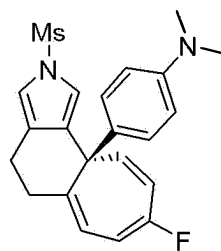

2ai

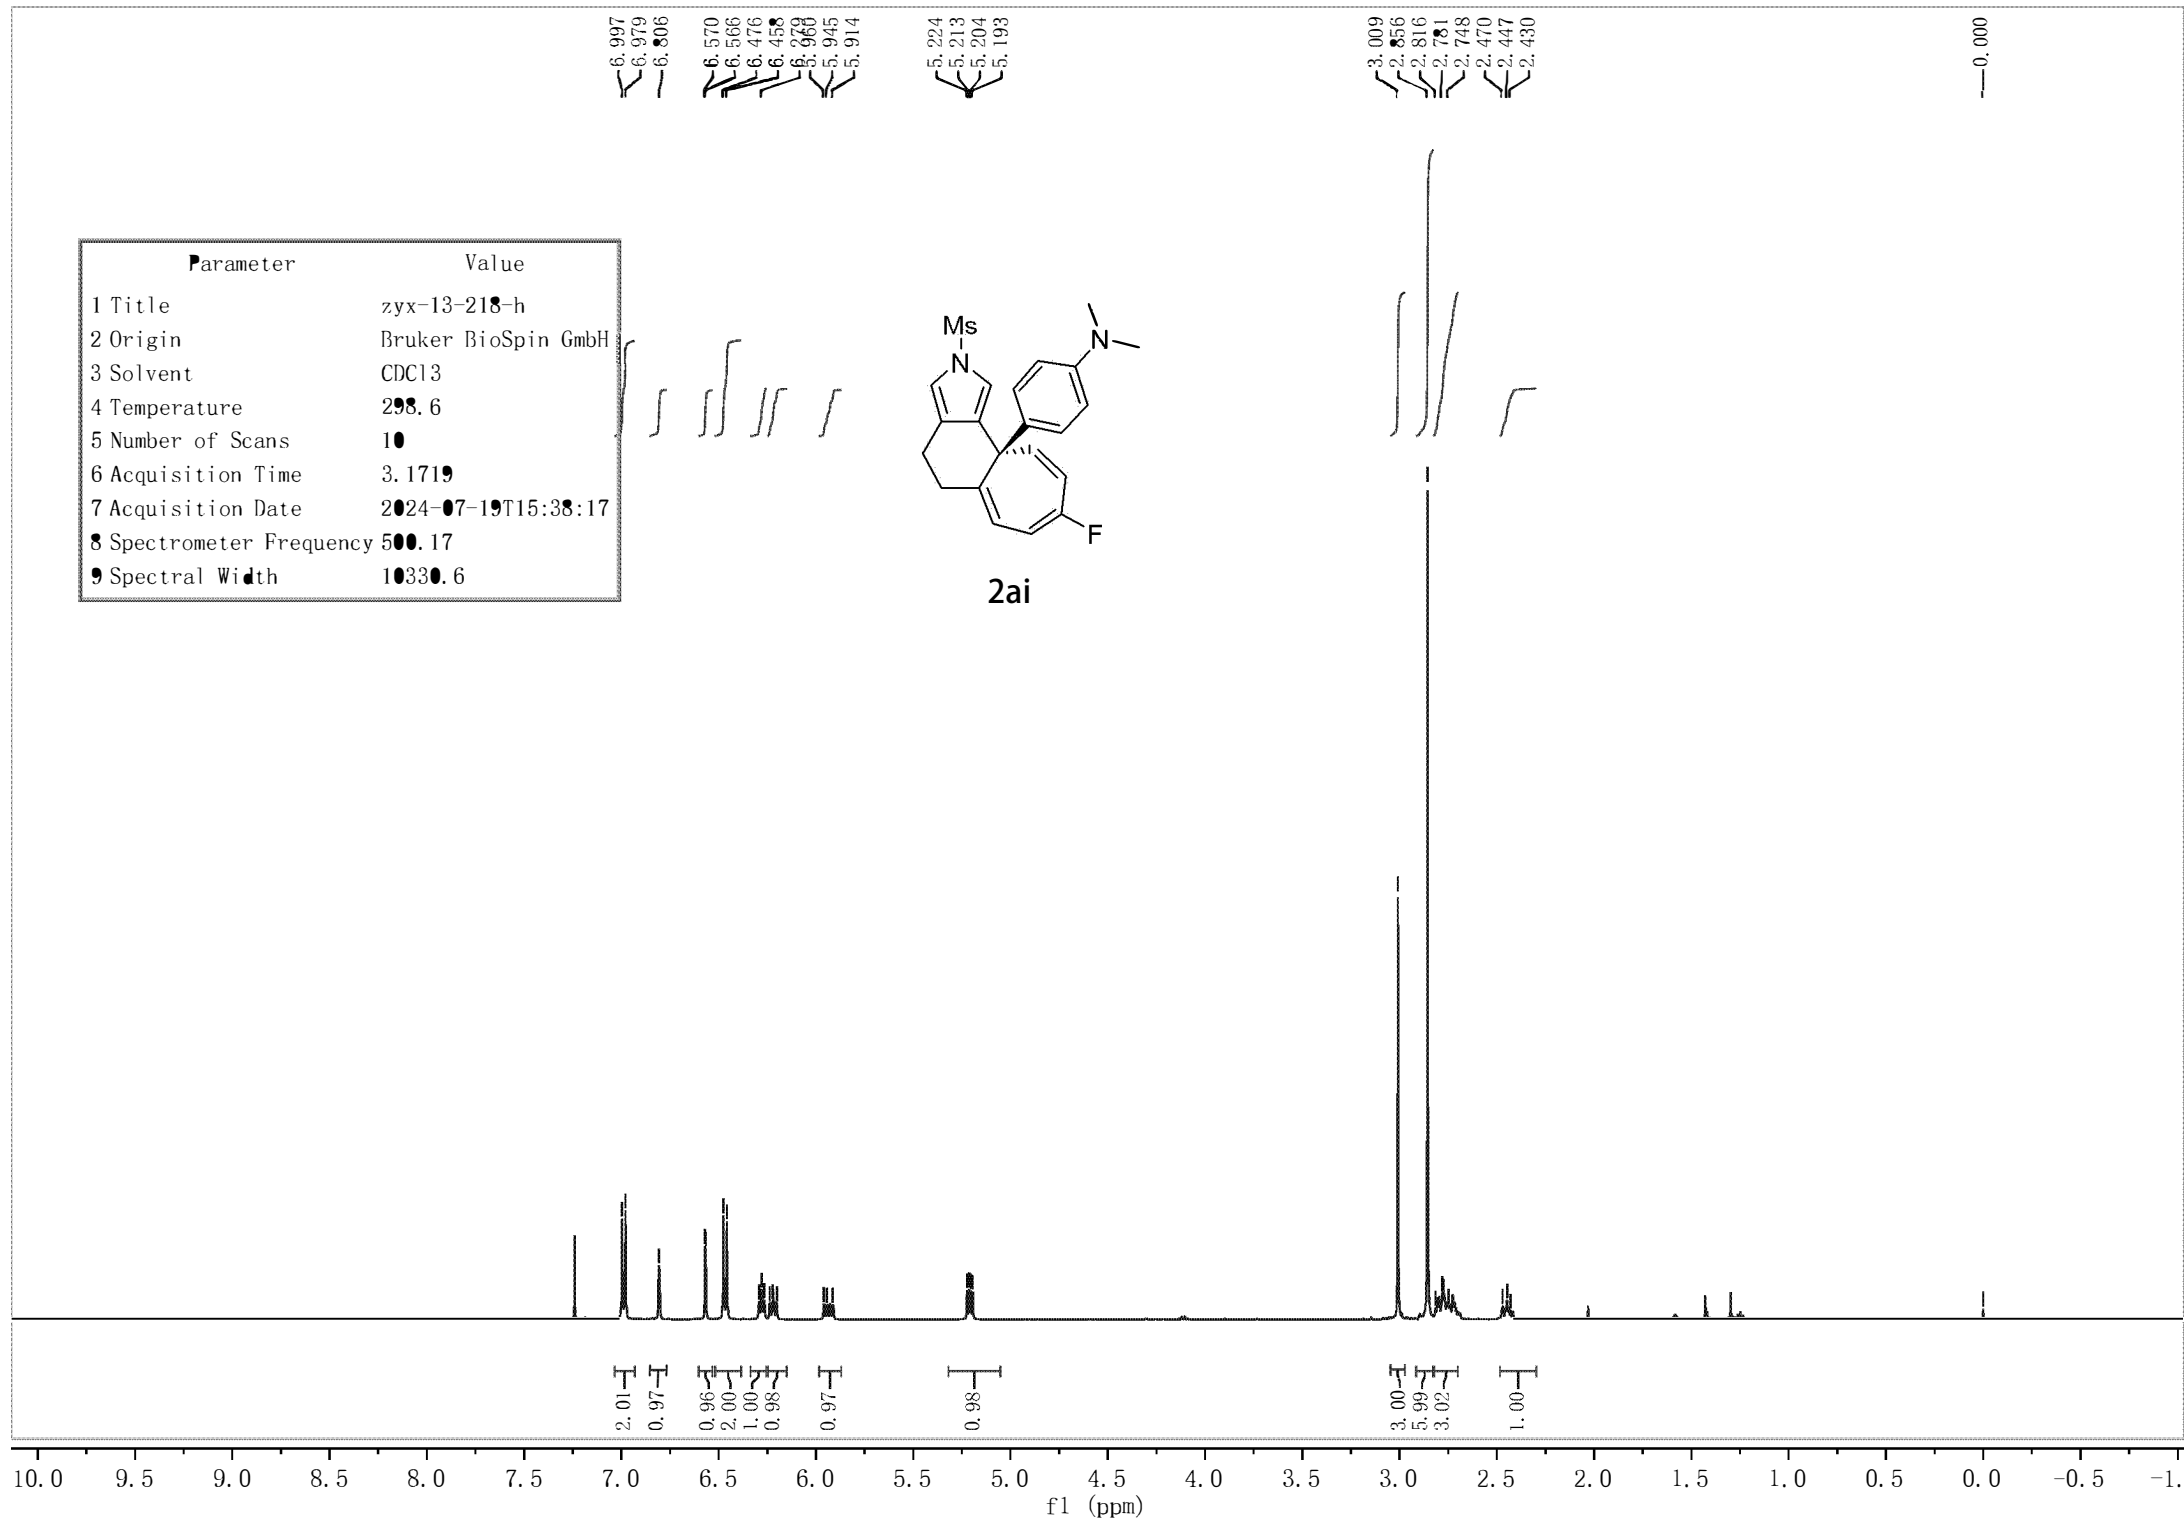



| Parameter                | Value               |
|--------------------------|---------------------|
| 1 Title                  | zyx-13-218-c        |
| 2 Origin                 | Bruker BioSpin GmbH |
| 3 Solvent                | CDCl3               |
| 4 Temperature            | 298.7               |
| 5 Number of Scans        | 83                  |
| 6 Acquisition Time       | 1.1010              |
| 7 Acquisition Date       | 2024-07-19T15:41:24 |
| 8 Spectrometer Frequency | 125.77              |
| 9 Spectral Width         | 29761.9             |

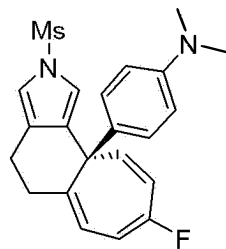

2ai

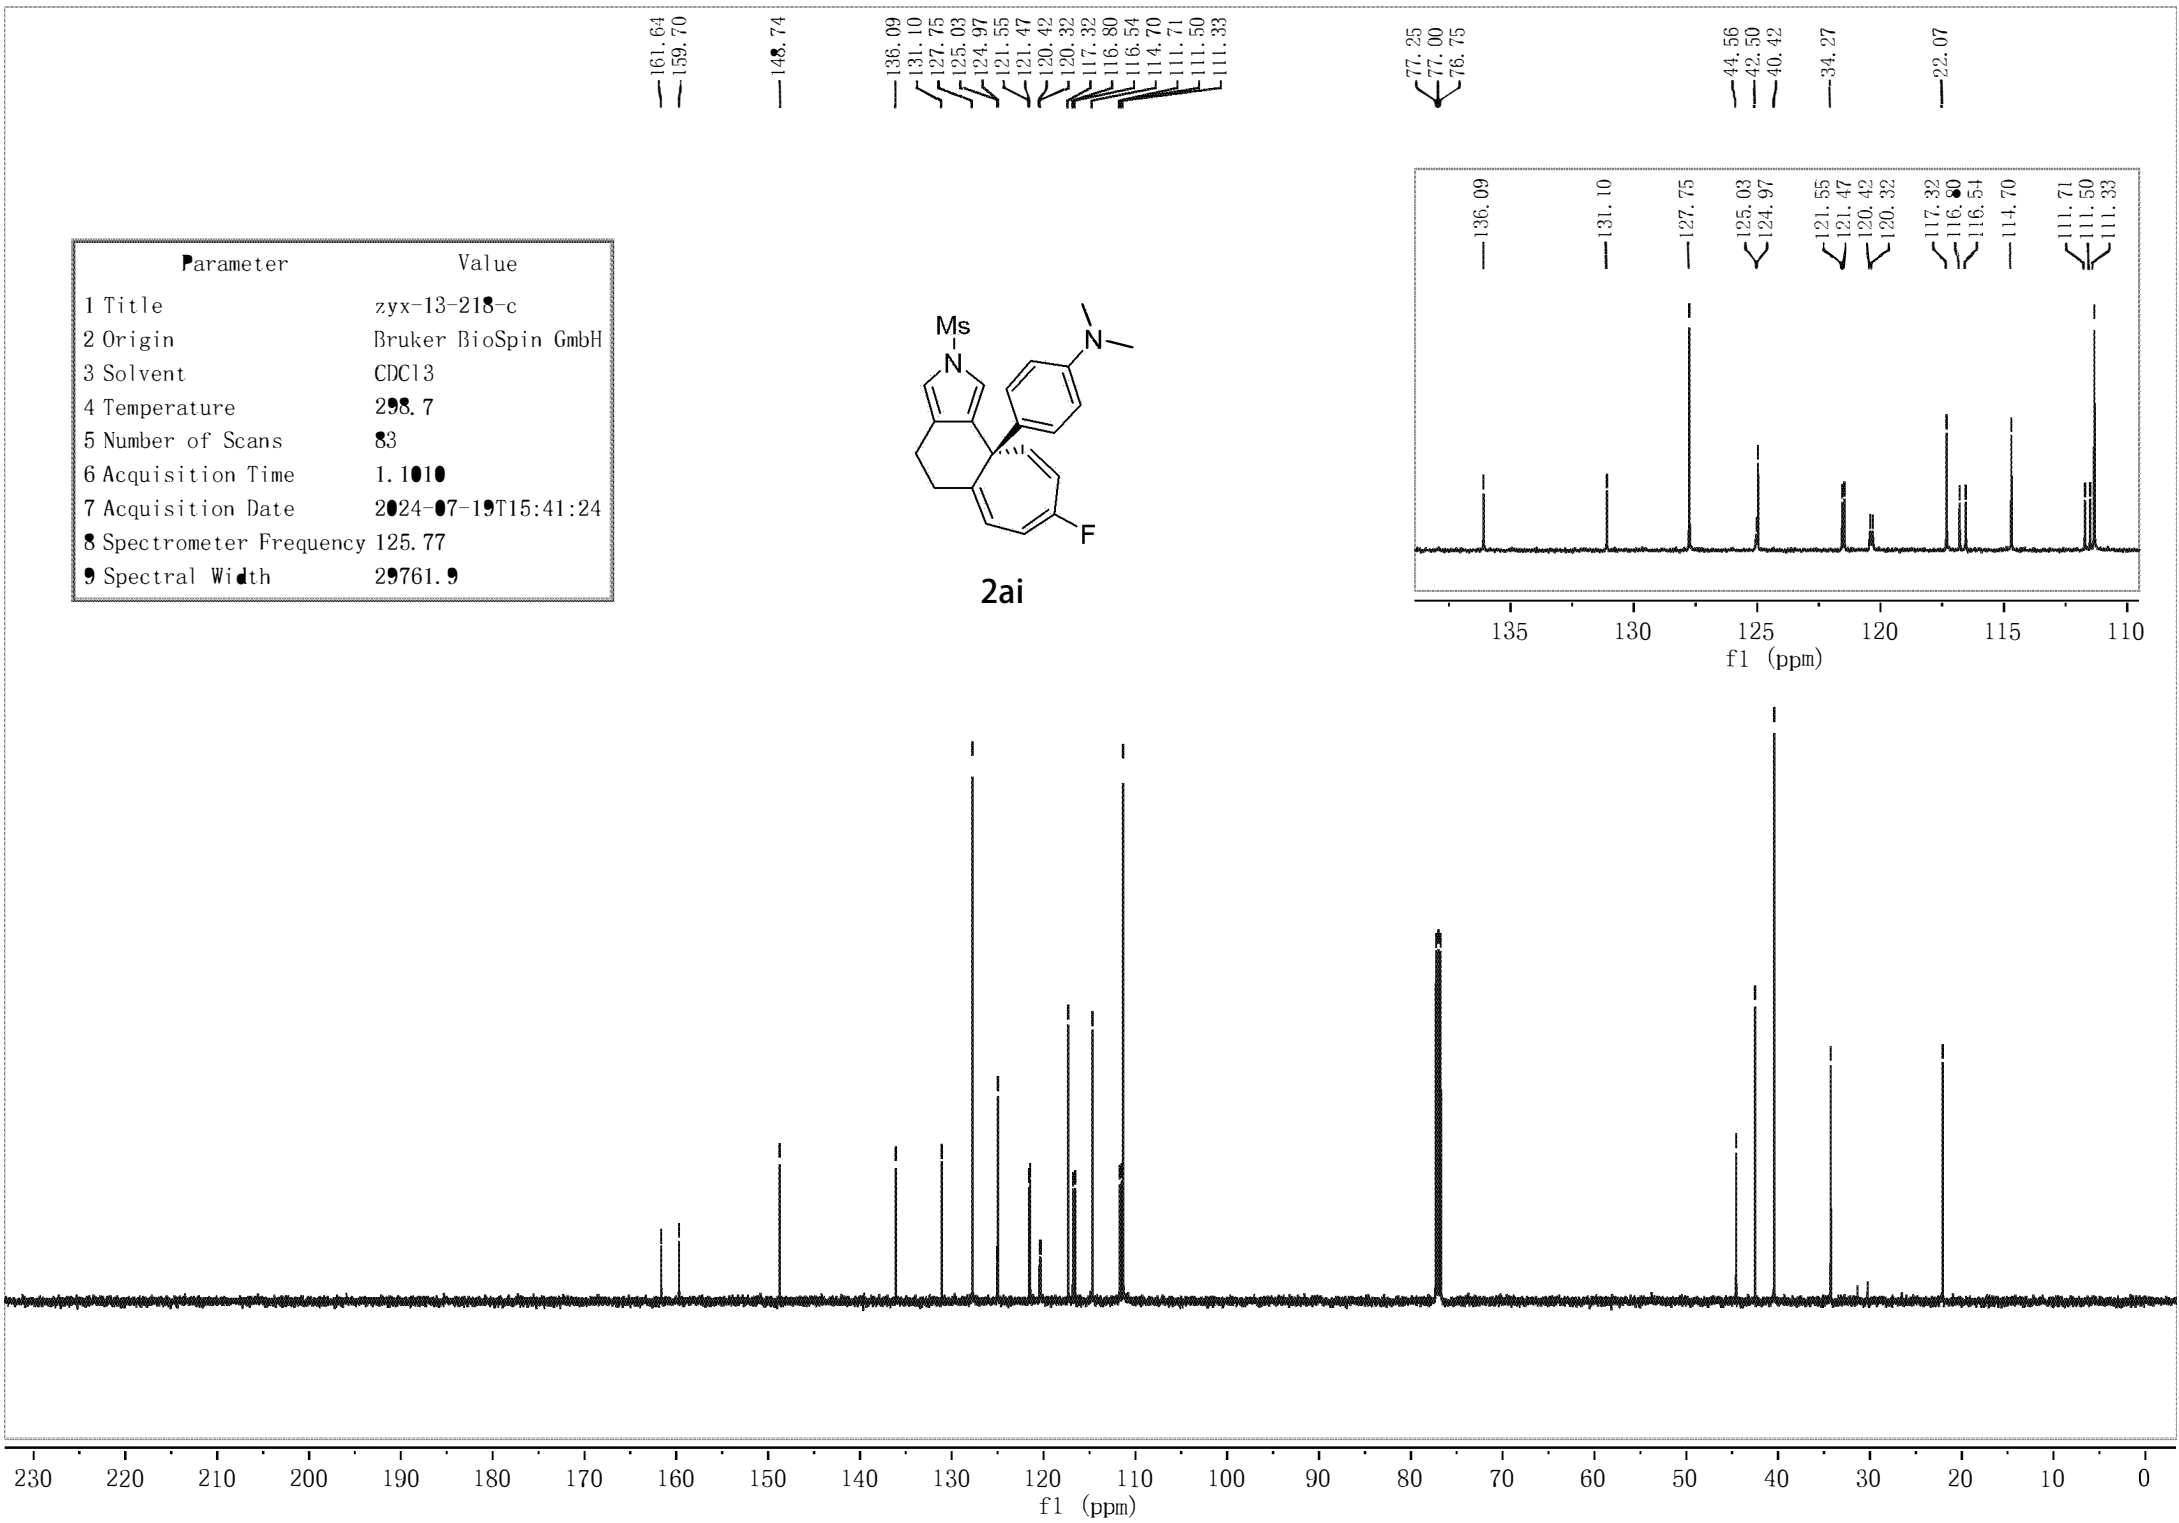

| Parameter                | Value               |
|--------------------------|---------------------|
| 1 Title                  | zyx-13-218-dept     |
| 2 Origin                 | Bruker BioSpin GmbH |
| 3 Solvent                | CDCl3               |
| 4 Temperature            | 299.0               |
| 5 Number of Scans        | 14                  |
| 6 Acquisition Time       | 1.1010              |
| 7 Acquisition Date       | 2024-07-19T15:46:41 |
| 8 Spectrometer Frequency | 125.77              |
| 9 Spectral Width         | 29761.9             |

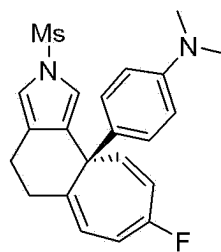

2ai

127.856  
121.655  
121.571  
120.537  
120.435  
117.423  
116.900  
116.646  
114.798  
111.816  
111.606  
111.433

42.608  
40.526  
34.370  
22.167

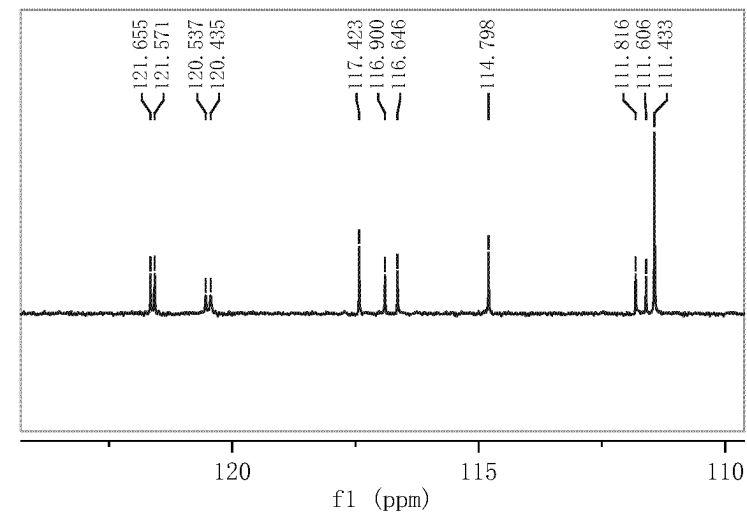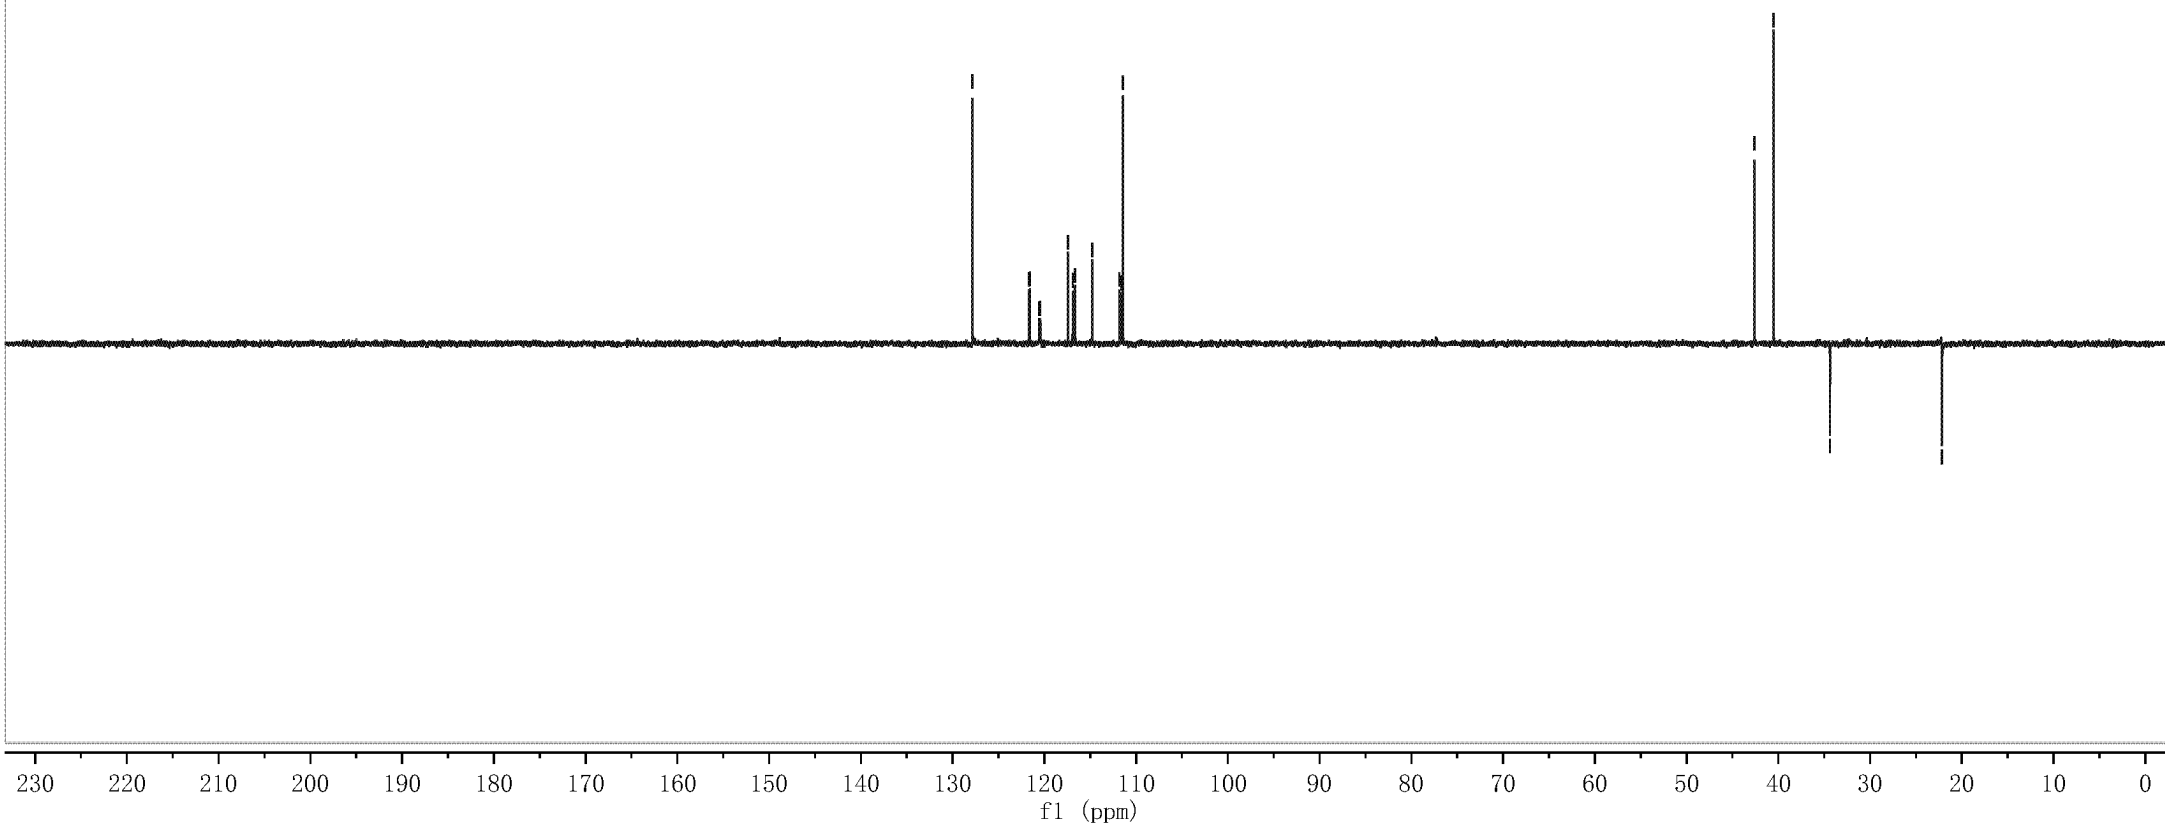

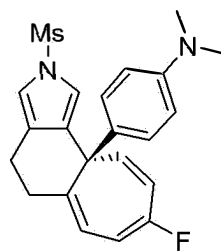

2ai

| Parameter                | Value               |
|--------------------------|---------------------|
| 1 Title                  | zyx-13-206-f        |
| 2 Origin                 |                     |
| 3 Solvent                | CDC13               |
| 4 Temperature            | 299.1               |
| 5 Number of Scans        | 16                  |
| 6 Acquisition Time       | 1.0000              |
| 7 Acquisition Date       | 2024-07-15T03:13:21 |
| 8 Spectrometer Frequency | 376.27              |
| 9 Spectral Width         | 96153.0             |

107.155  
107.172  
107.194  
107.211

20 10 0 -10 -20 -30 -40 -50 -60 -70 -80 -90 -100 -110 -120 -130 -140 -150 -160 -170 -180 -190 -200 -210 -220  
f1 (ppm)

7.641  
7.624  
7.457  
7.451  
7.349  
7.332  
7.320  
7.268  
7.248  
7.229  
7.195  
7.108  
7.090  
7.072  
6.915  
6.897  
6.838  
6.834  
6.817  
6.813  
6.576  
6.571  
6.558  
6.554  
6.537  
6.533  
6.379  
6.352  
6.328  
6.225  
6.200  
6.062  
6.057  
6.041  
6.036

| Parameter                | Value               |
|--------------------------|---------------------|
| 1 Title                  | ZYX-3-136-H         |
| 2 Origin                 | Bruker BioSpin GmbH |
| 3 Solvent                | CDC13               |
| 4 Temperature            | 298.0               |
| 5 Number of Scans        | 14                  |
| 6 Acquisition Time       | 4.0894              |
| 7 Acquisition Date       | 2021-12-01T16:12:47 |
| 8 Spectrometer Frequency | 400.13              |
| 9 Spectral Width         | 8012.8              |

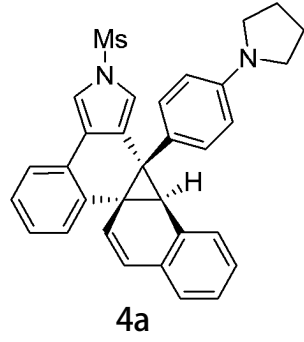

3.222  
3.154  
3.105  
3.073  
-2.619  
1.927  
1.911  
1.896

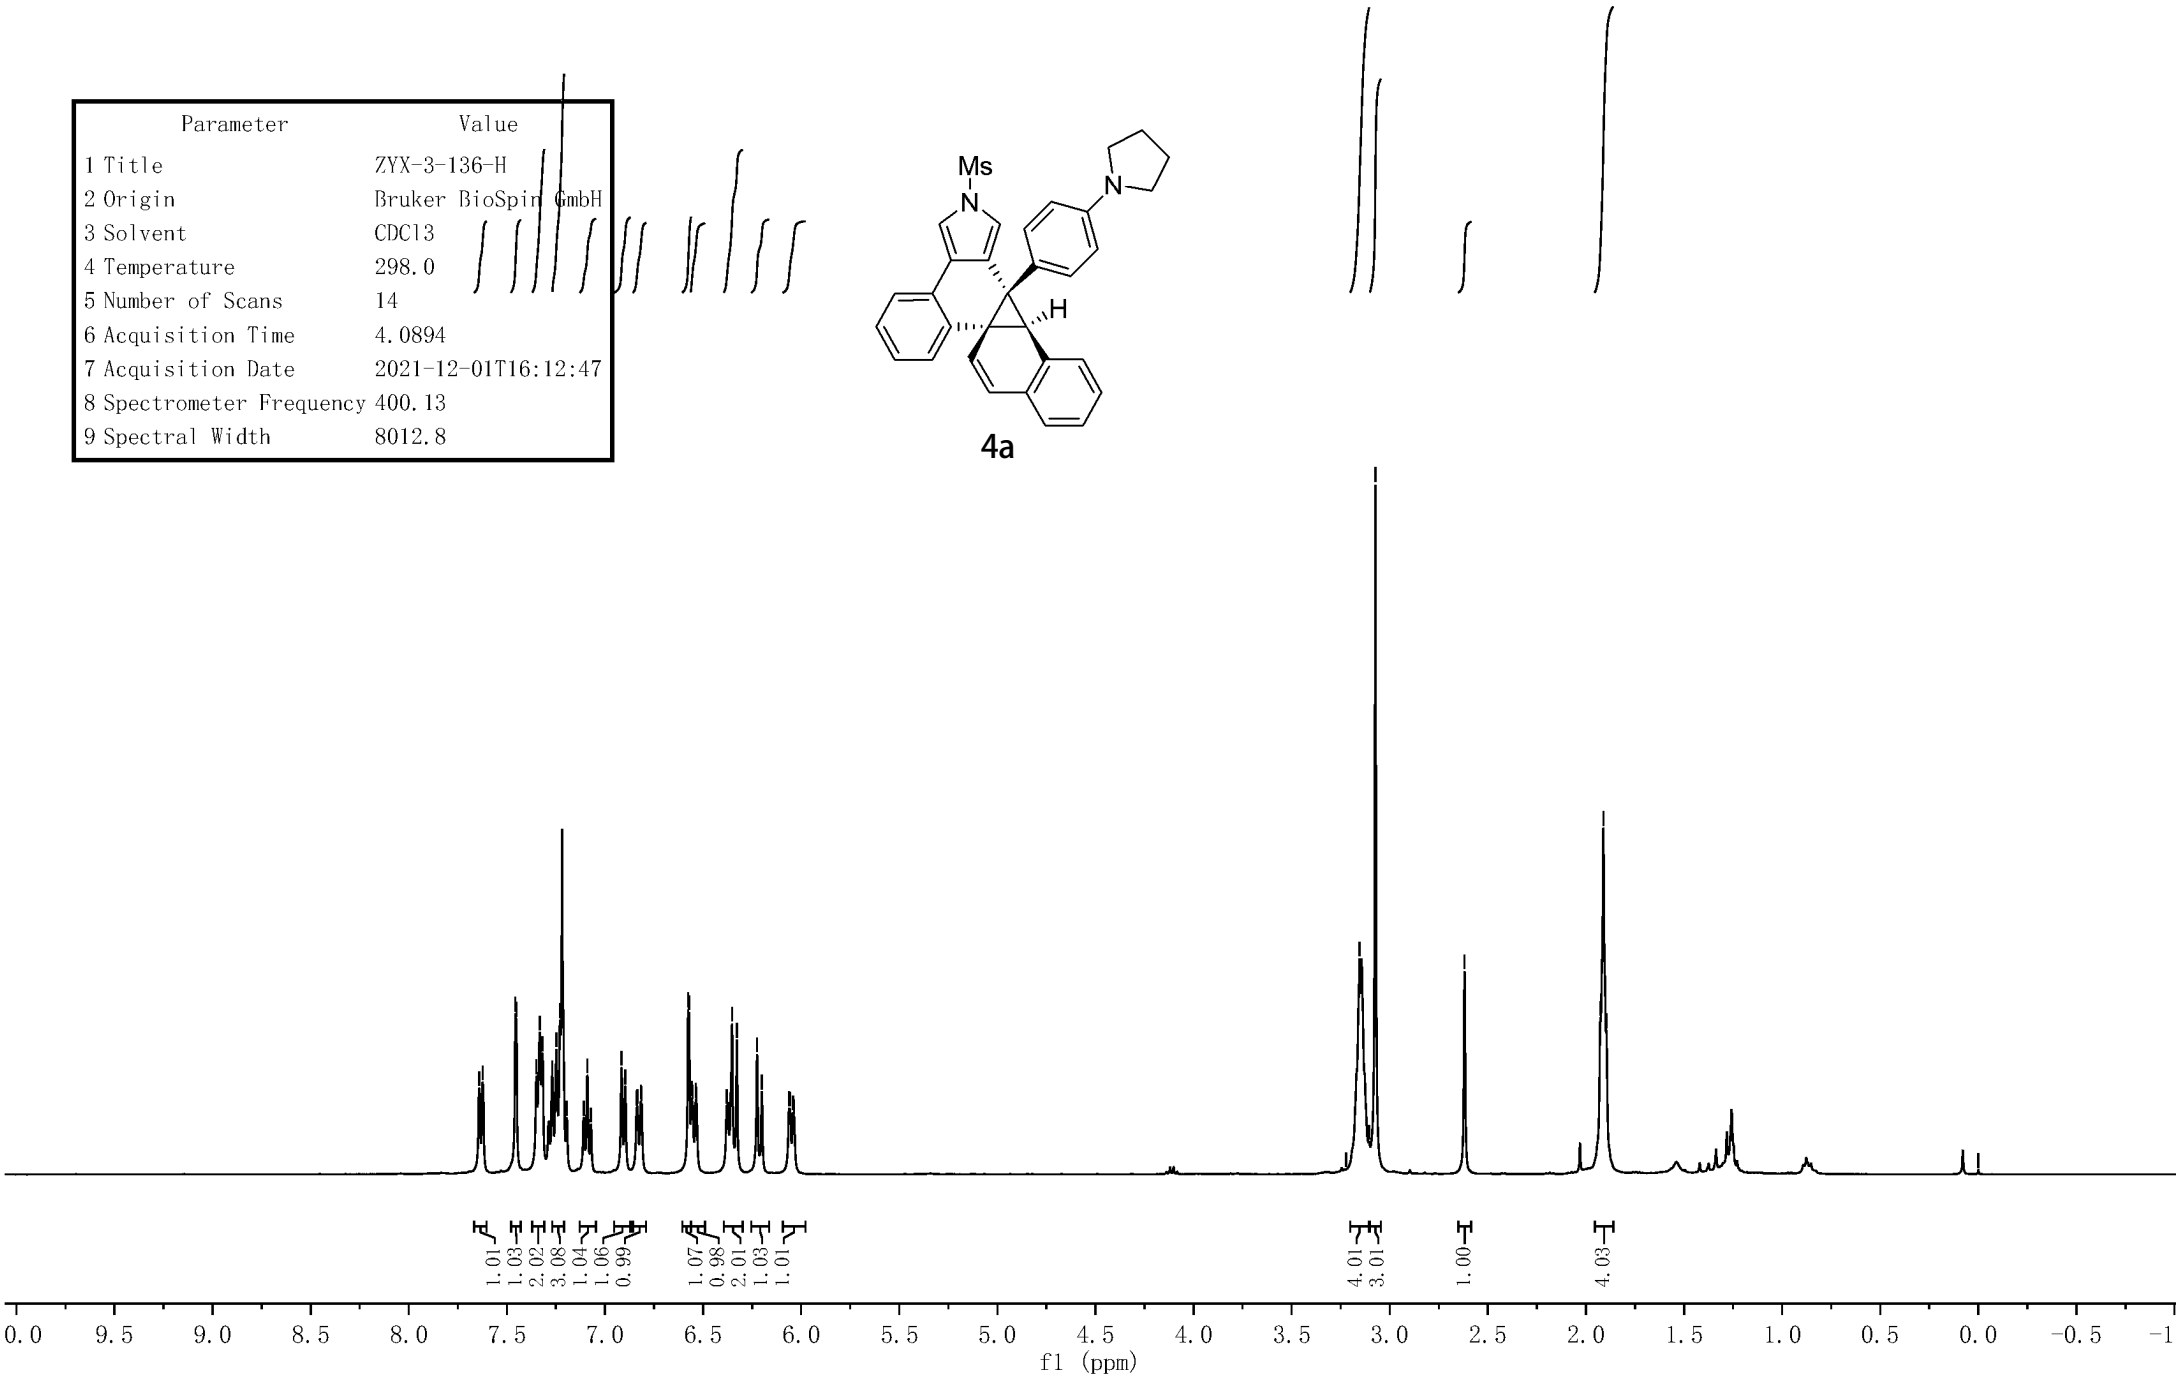

-0.000

| Parameter                | Value               |
|--------------------------|---------------------|
| 1 Title                  | ZYX-3-136-C         |
| 2 Origin                 | Bruker BioSpin GmbH |
| 3 Solvent                | CDCl3               |
| 4 Temperature            | 300.0               |
| 5 Number of Scans        | 56                  |
| 6 Acquisition Time       | 1.3631              |
| 7 Acquisition Date       | 2021-12-01T16:15:00 |
| 8 Spectrometer Frequency | 100.61              |
| 9 Spectral Width         | 24038.5             |

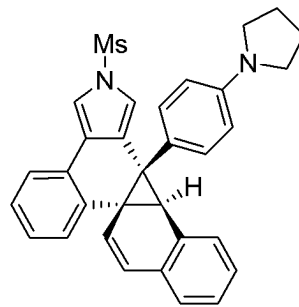

4a

146.03  
131.32  
129.92  
128.89  
127.45  
127.40  
127.37  
127.29  
126.08  
126.04  
125.93  
123.08  
118.73  
111.64  
109.63

77.32  
77.00  
76.68

47.36  
42.65  
41.47  
37.31

27.93  
25.36

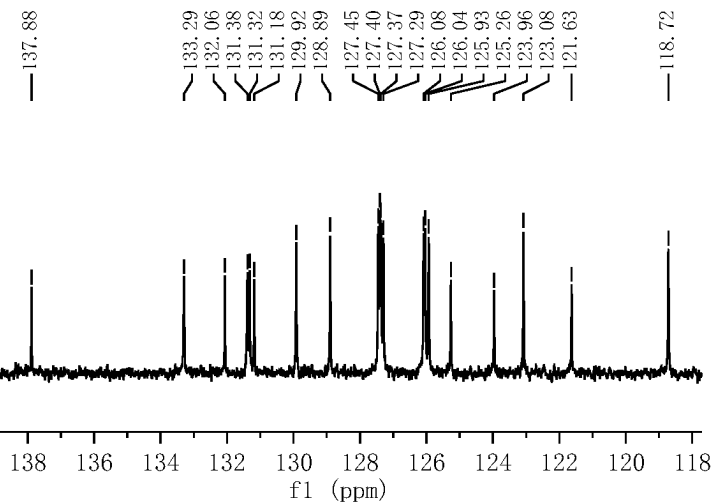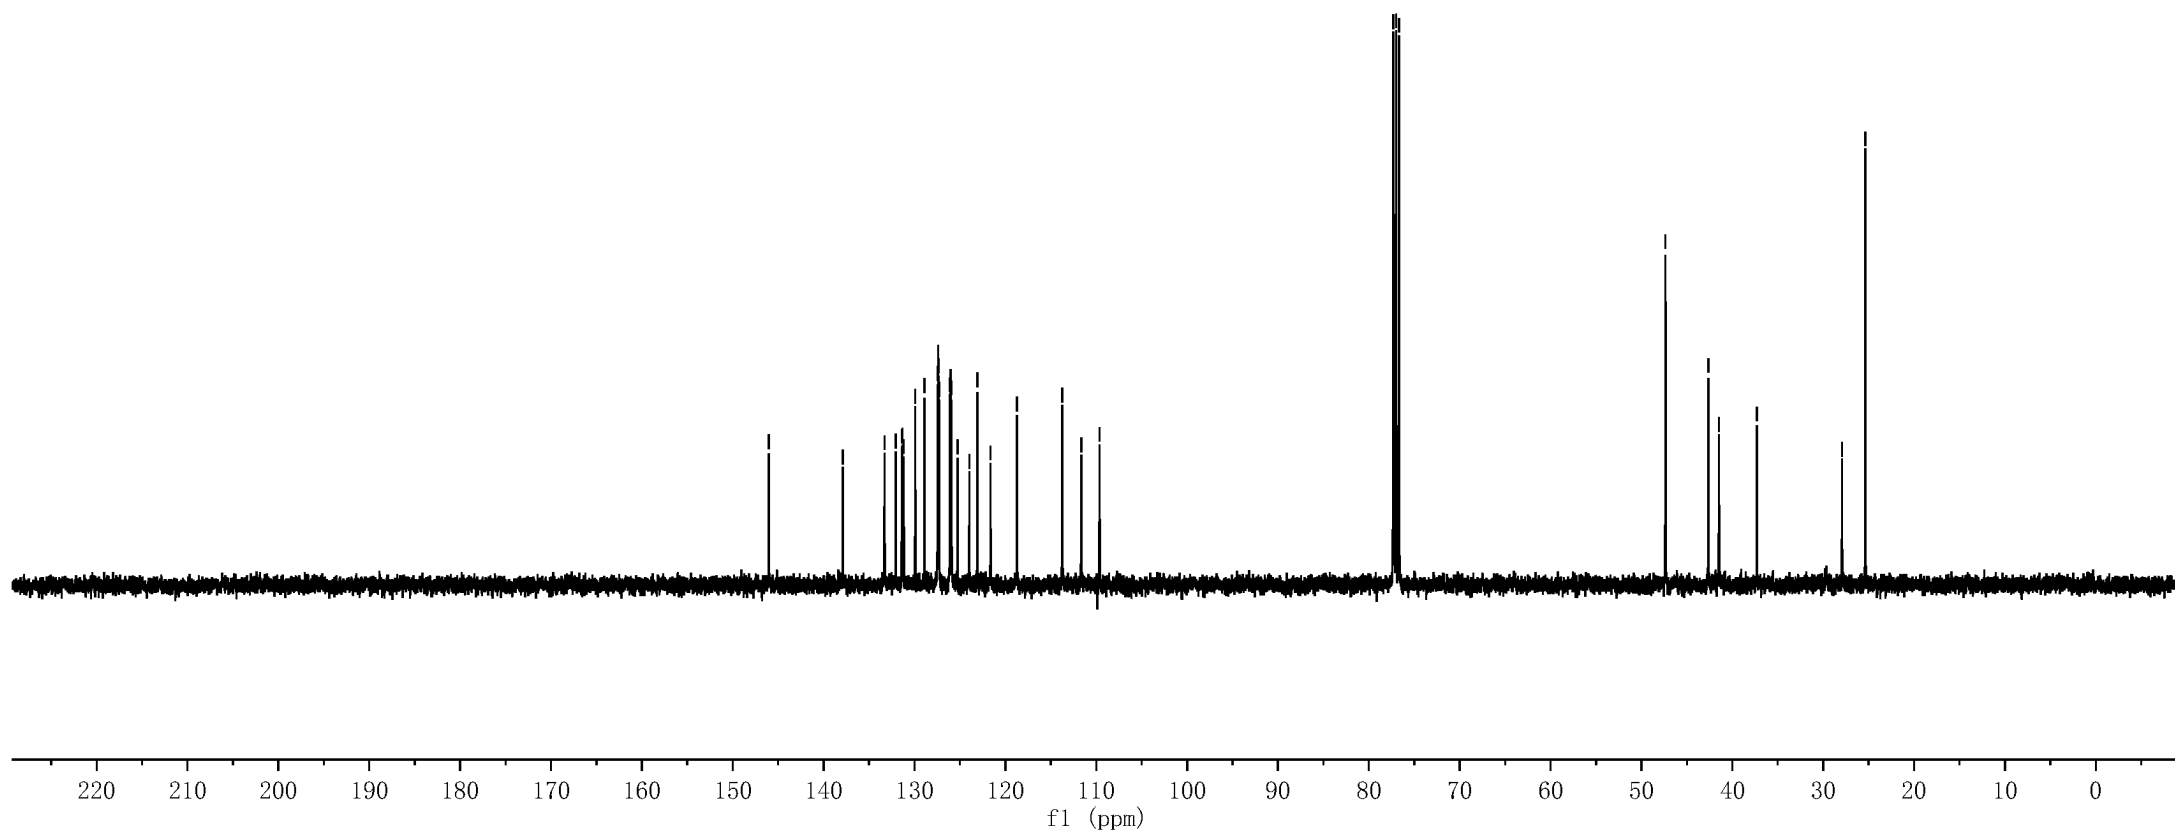

| Parameter                | Value               |
|--------------------------|---------------------|
| 1 Title                  | ZYX-3-136-DEPT      |
| 2 Origin                 | Bruker BioSpin GmbH |
| 3 Solvent                | CDC13               |
| 4 Temperature            | 300.0               |
| 5 Number of Scans        | 15                  |
| 6 Acquisition Time       | 1.3631              |
| 7 Acquisition Date       | 2021-12-01T16:19:12 |
| 8 Spectrometer Frequency | 100.61              |
| 9 Spectral Width         | 24038.5             |

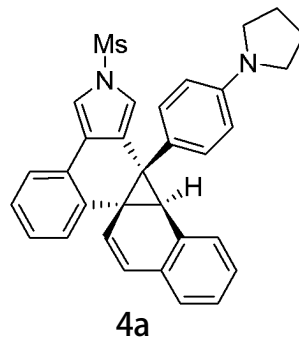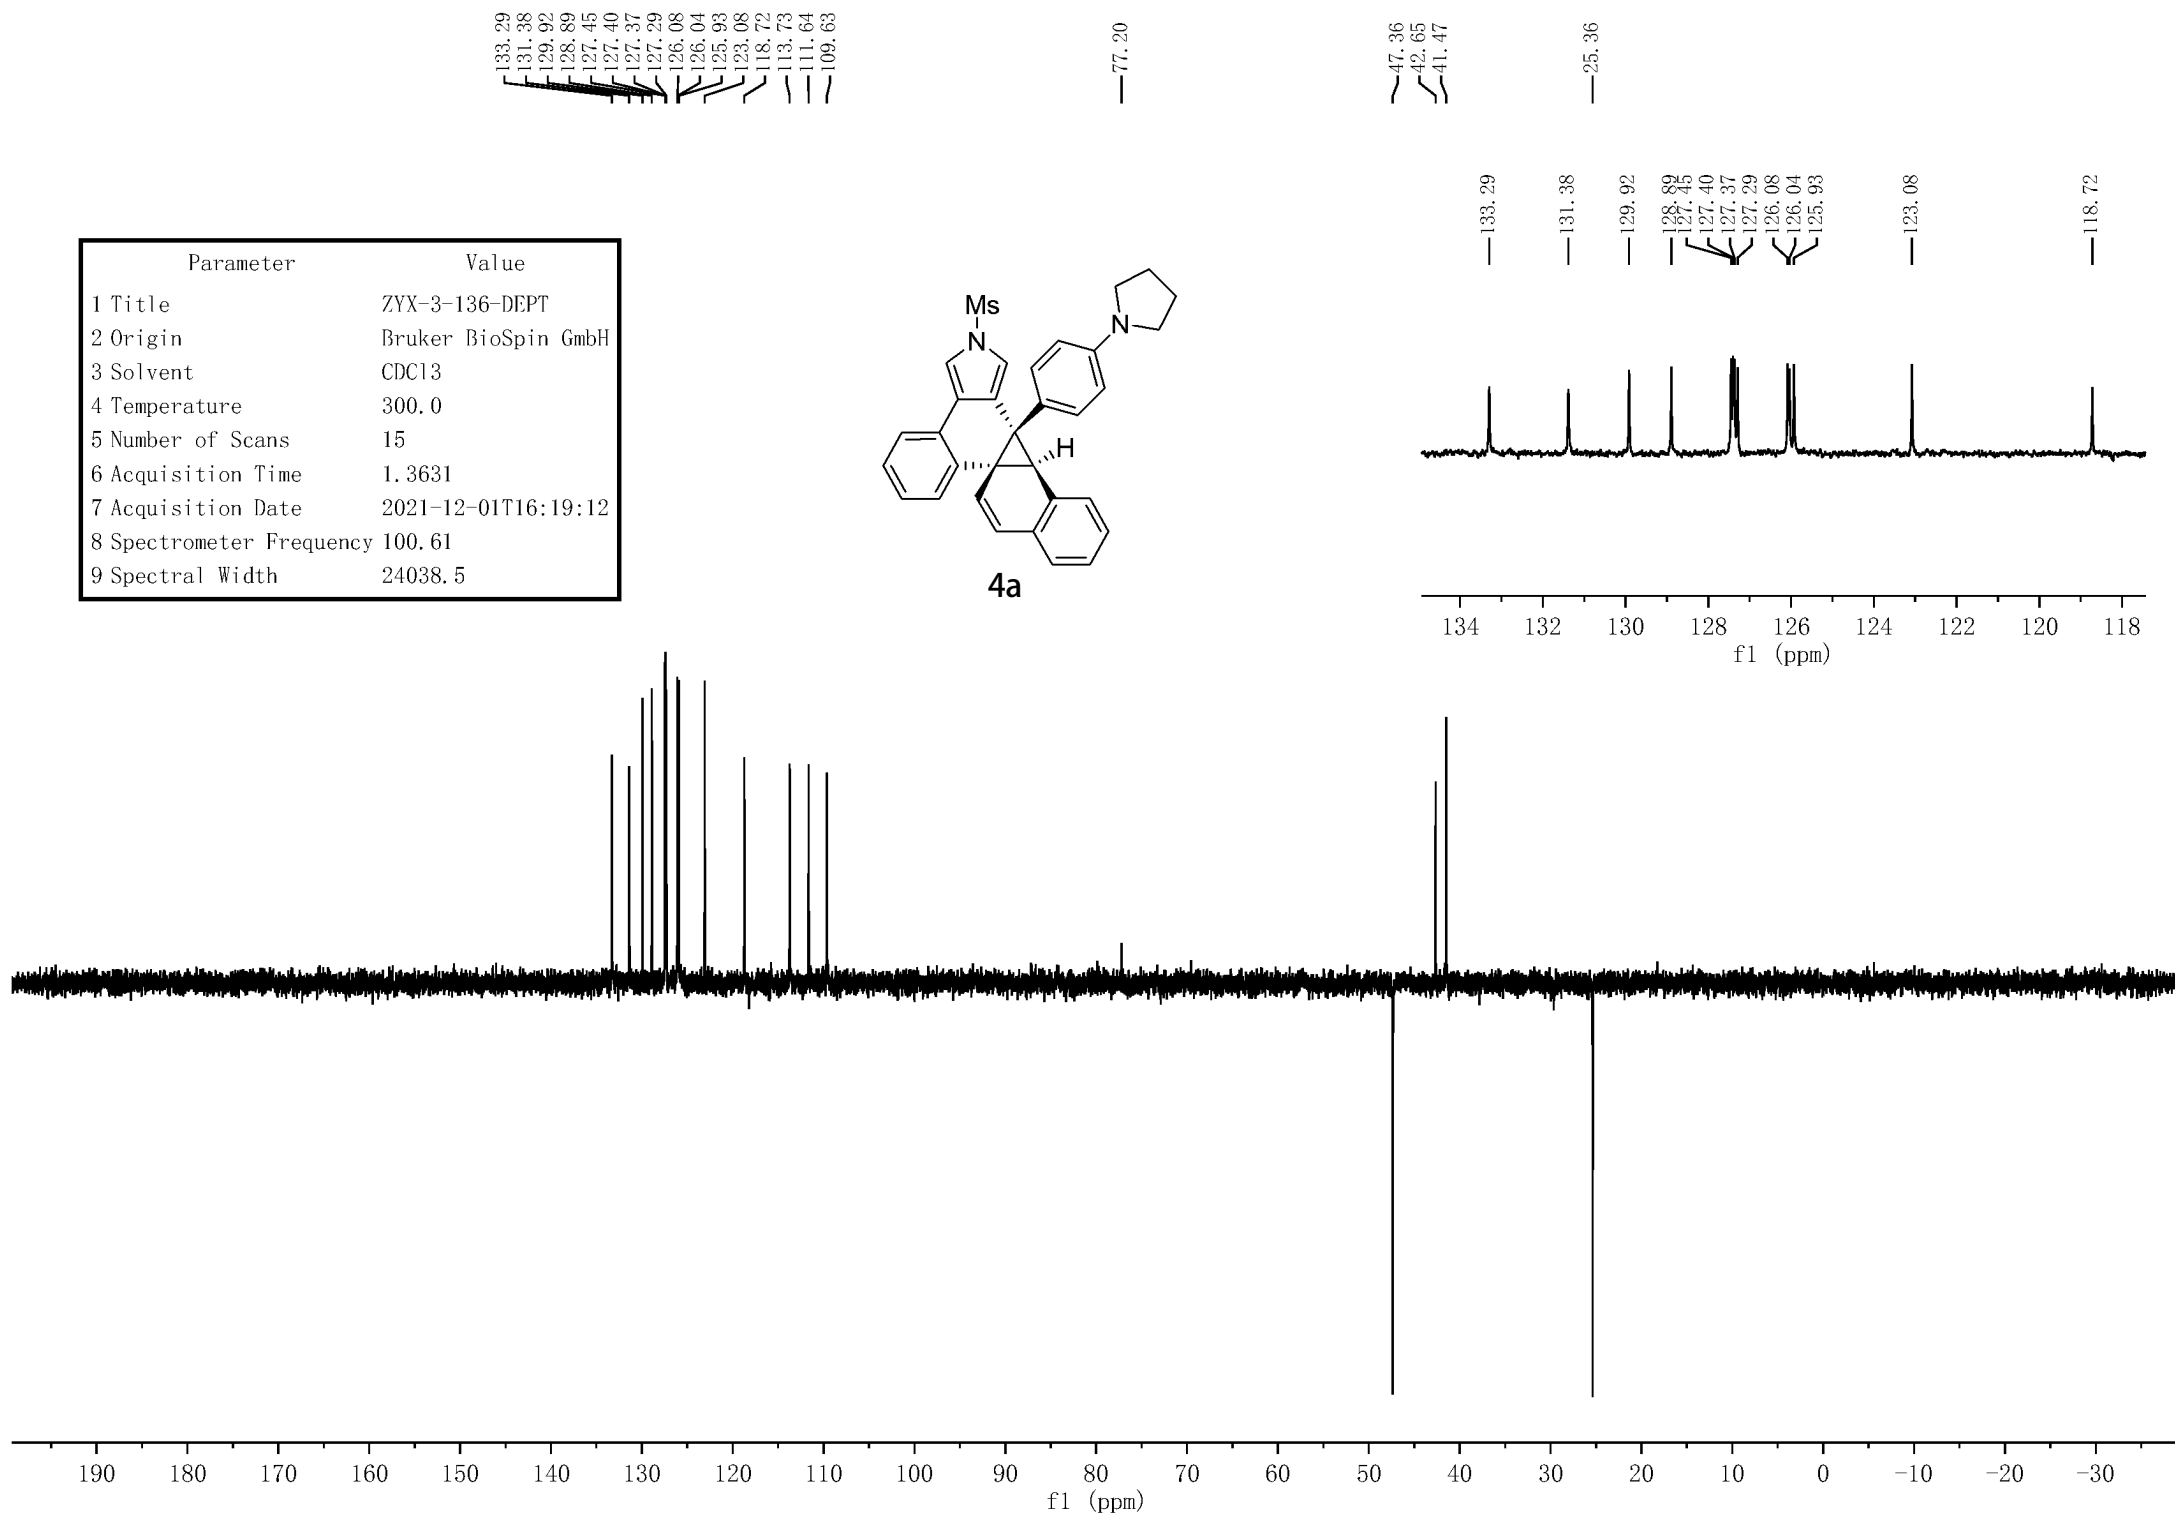

| Parameter                | Value               |
|--------------------------|---------------------|
| 1 Title                  | zyx-3-128-h         |
| 2 Origin                 | Bruker BioSpin GmbH |
| 3 Solvent                | CDCl3               |
| 4 Temperature            | 298.0               |
| 5 Number of Scans        | 11                  |
| 6 Acquisition Time       | 4.0894              |
| 7 Acquisition Date       | 2021-11-27T16:31:18 |
| 8 Spectrometer Frequency | 400.13              |
| 9 Spectral Width         | 8012.8              |

7.695  
7.674  
7.602  
7.585  
7.479  
7.474  
7.294  
7.264  
7.236  
7.183  
7.165  
7.141  
7.088  
7.070  
7.052  
6.890  
6.871  
6.771  
6.751  
6.624  
6.618  
6.618  
6.513  
6.492  
6.357  
6.353  
6.336  
6.331  
6.317  
6.292  
6.164  
6.140  
6.042  
6.022

3.165  
3.150  
3.134  
3.119  
2.556  
2.358  
1.921  
1.906  
1.891

0.000

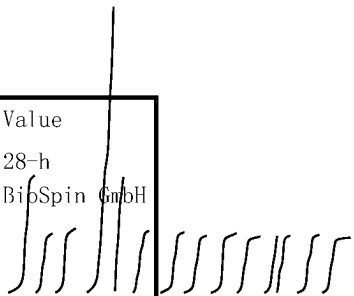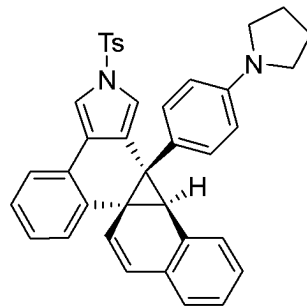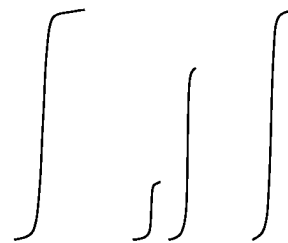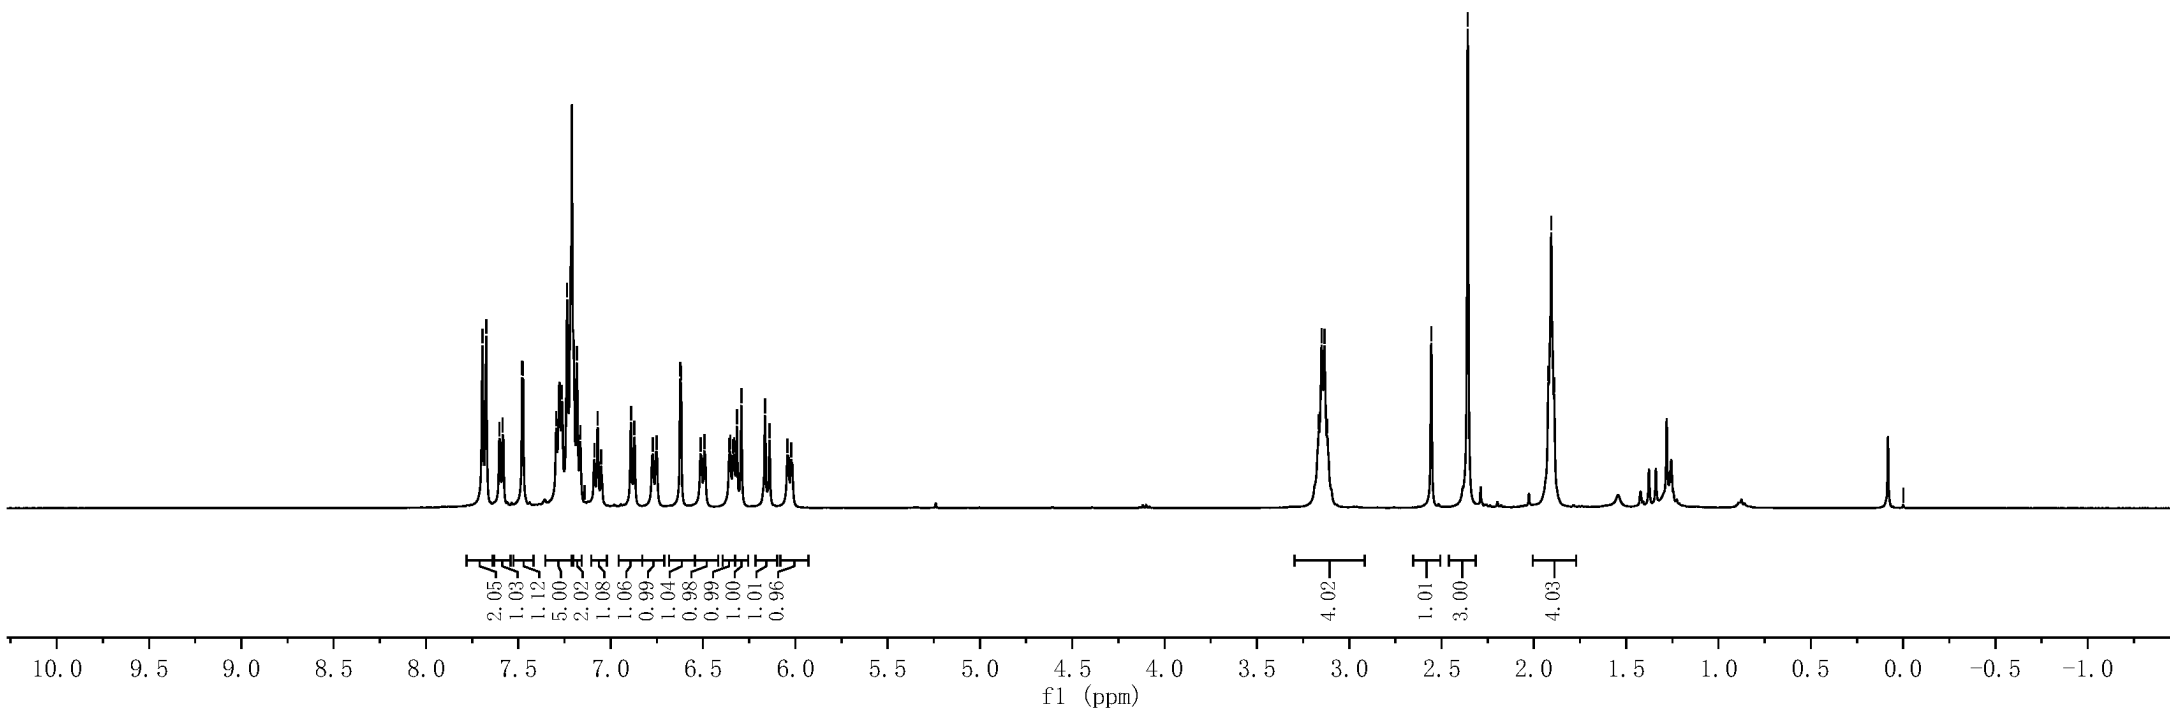

| Parameter                | Value               |
|--------------------------|---------------------|
| 1 Title                  | zyx-3-128-c         |
| 2 Origin                 | Bruker BioSpin GmbH |
| 3 Solvent                | CDCl3               |
| 4 Temperature            | 300.0               |
| 5 Number of Scans        | 36                  |
| 6 Acquisition Time       | 1.3631              |
| 7 Acquisition Date       | 2021-11-27T16:33:04 |
| 8 Spectrometer Frequency | 100.61              |
| 9 Spectral Width         | 24038.5             |

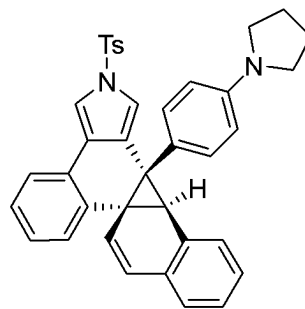

4b

145.99  
144.76  
131.36  
131.05  
129.87  
128.87  
127.36  
127.24  
126.82  
125.96  
123.03  
121.86  
119.89  
111.68  
109.52

77.32  
77.00  
76.68

47.37  
41.42  
37.35

27.96  
25.36  
21.56

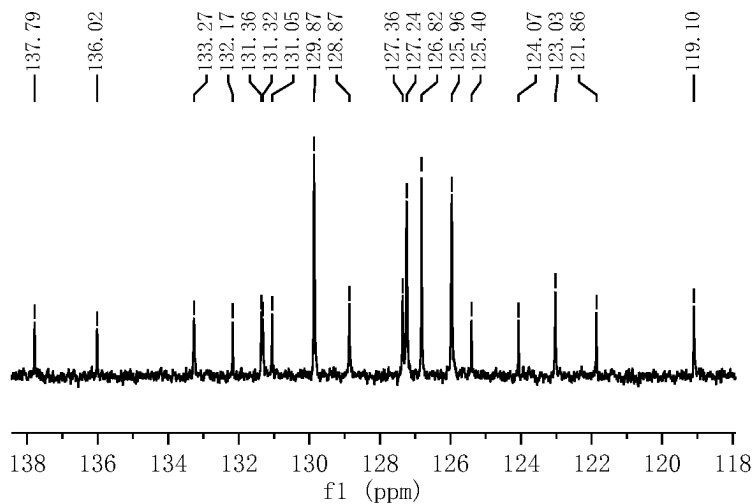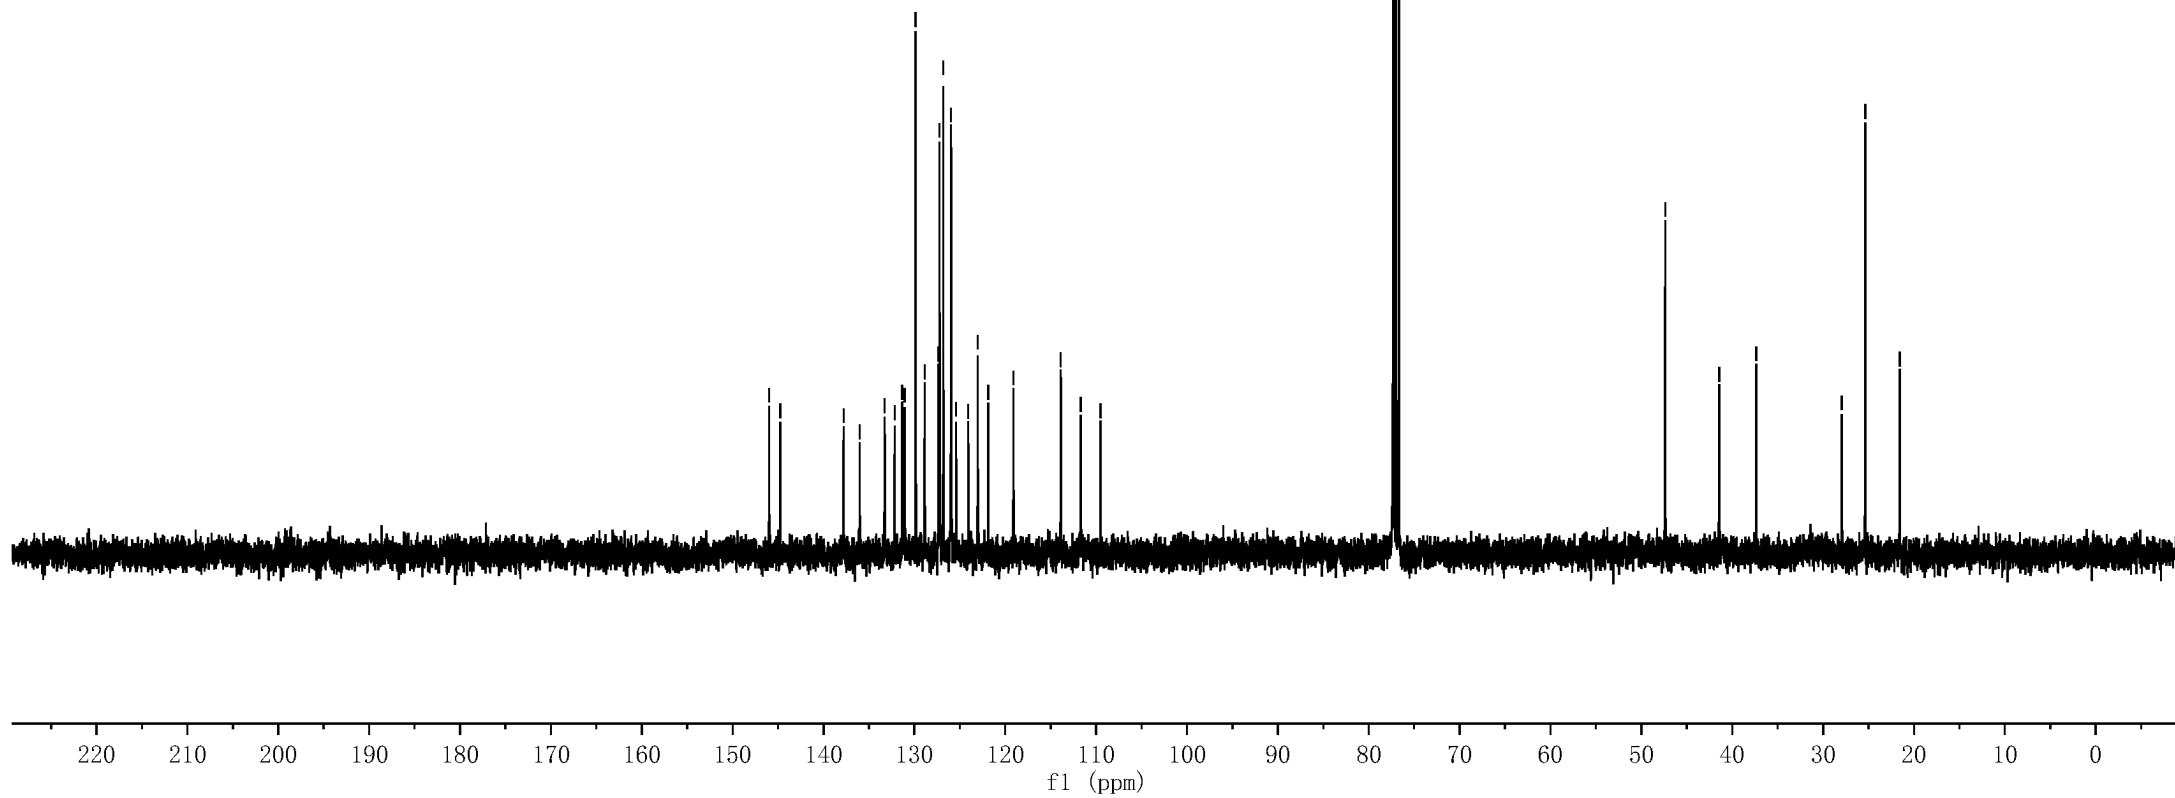



7.811  
7.792  
7.615  
7.598  
7.568  
7.550  
7.531  
7.498  
7.493  
7.467  
7.448  
7.429  
7.304  
7.287  
7.275  
7.193  
7.175  
7.143  
7.098  
7.080  
7.062  
6.900  
6.881  
6.772  
6.753  
6.631  
6.627  
6.512  
6.492  
6.356  
6.334  
6.325  
6.301  
6.170  
6.145  
6.046  
6.043  
6.026

| Parameter                | Value               |
|--------------------------|---------------------|
| 1 Title                  | zyx-3-150-h         |
| 2 Origin                 | Bruker BioSpin GmbH |
| 3 Solvent                | CDCl3               |
| 4 Temperature            | 298.0               |
| 5 Number of Scans        | 16                  |
| 6 Acquisition Time       | 4.0894              |
| 7 Acquisition Date       | 2021-12-07T15:56:24 |
| 8 Spectrometer Frequency | 400.13              |
| 9 Spectral Width         | 8012.8              |

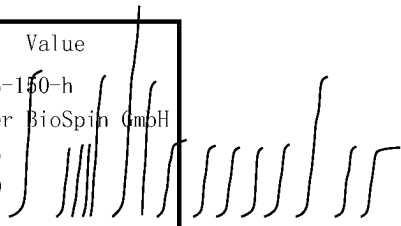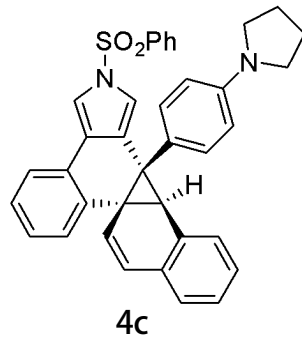

3.226  
3.142  
3.061  
2.562  
1.985  
1.914  
1.830  
0.000

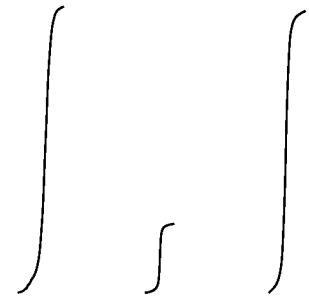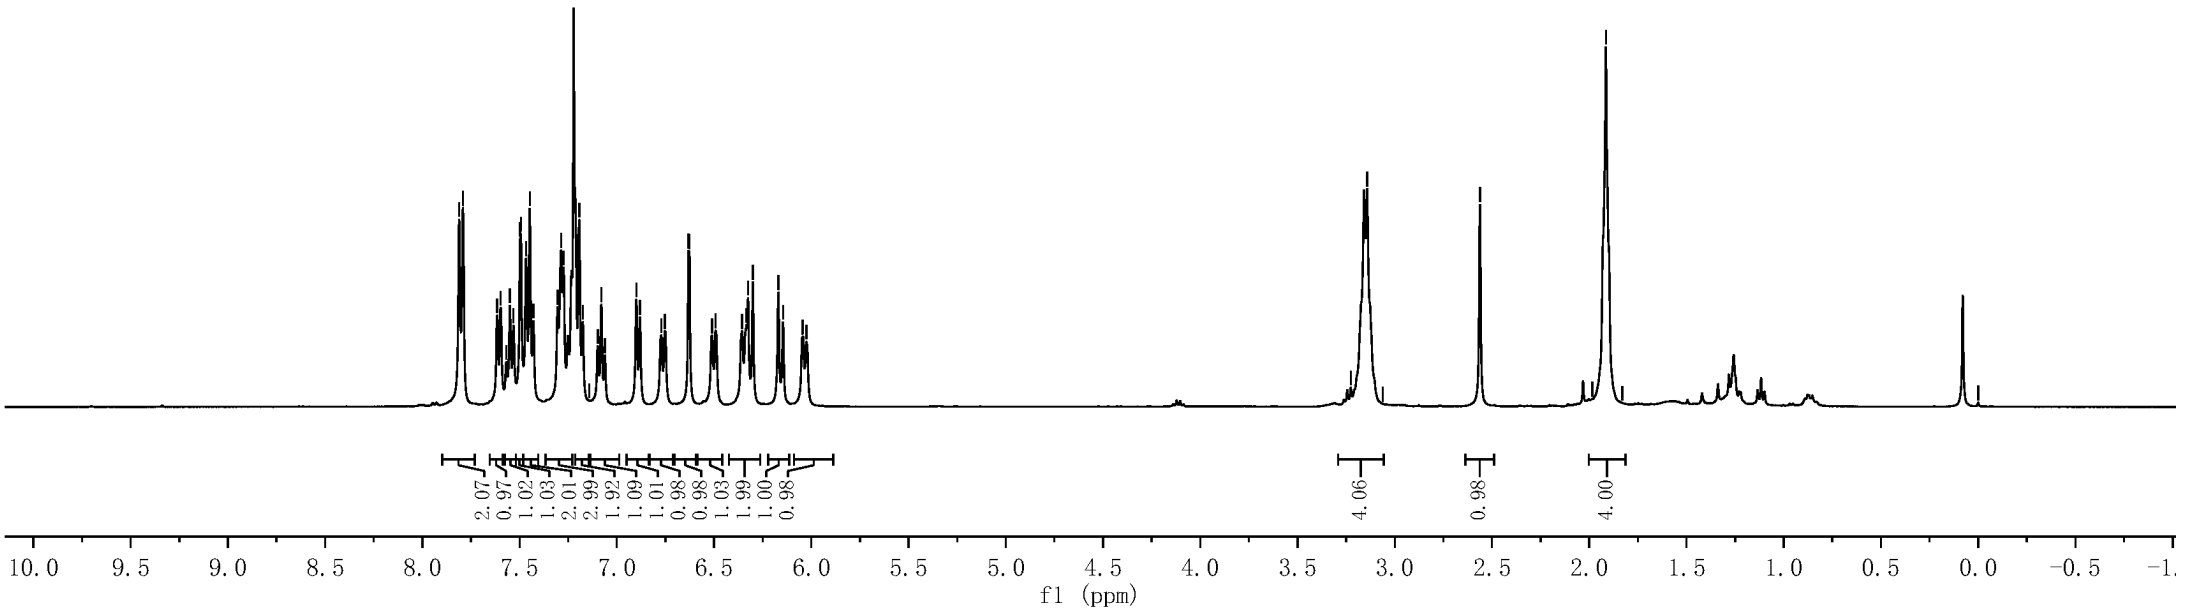

| Parameter                | Value               |
|--------------------------|---------------------|
| 1 Title                  | zyx-3-150-c         |
| 2 Origin                 | Bruker BioSpin GmbH |
| 3 Solvent                | CDCl3               |
| 4 Temperature            | 300.0               |
| 5 Number of Scans        | 63                  |
| 6 Acquisition Time       | 1.3631              |
| 7 Acquisition Date       | 2021-12-07T15:58:41 |
| 8 Spectrometer Frequency | 100.61              |
| 9 Spectral Width         | 24038.5             |

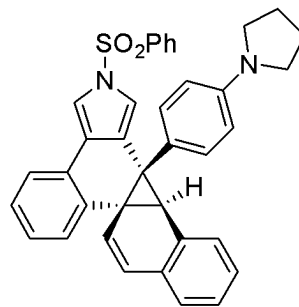

4c

146.01  
133.67  
131.32  
129.27  
127.39  
127.34  
127.29  
127.25  
126.75  
126.01  
126.00  
125.93  
123.97  
111.69  
109.52

77.32  
77.00  
76.68

47.38

41.45

37.36

27.94

25.37

133.67

133.27

132.14

131.37

131.32

129.89

129.27

128.89

127.39

127.34

127.29

127.25

126.75

126.01

126.00

125.93

125.32

124.04

123.07

122.05

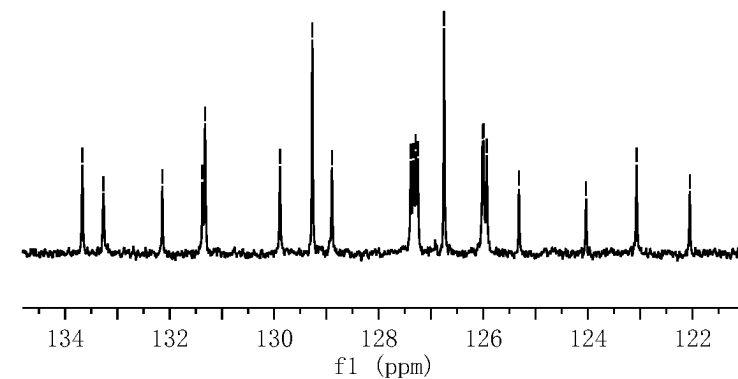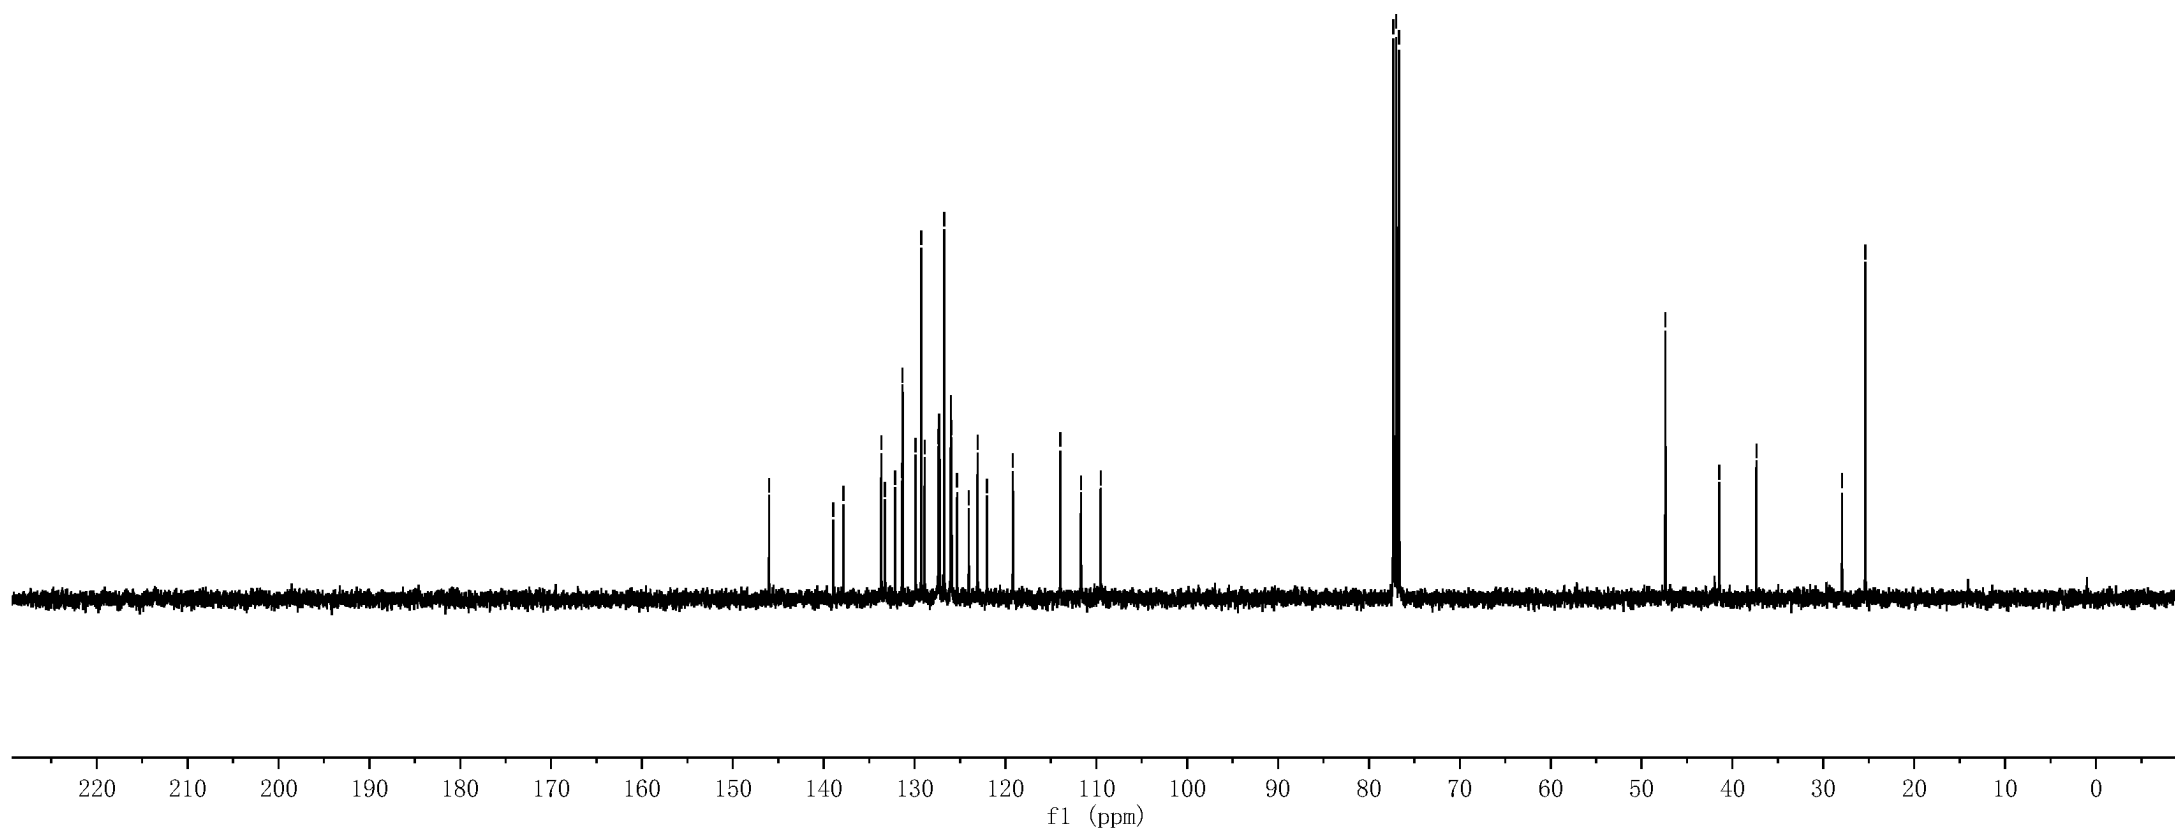

| Parameter                | Value               |
|--------------------------|---------------------|
| 1 Title                  | zyx-3-151-h         |
| 2 Origin                 | Bruker BioSpin GmbH |
| 3 Solvent                | CDCl3               |
| 4 Temperature            | 298.0               |
| 5 Number of Scans        | 12                  |
| 6 Acquisition Time       | 4.0894              |
| 7 Acquisition Date       | 2021-12-03T16:13:57 |
| 8 Spectrometer Frequency | 400.13              |
| 9 Spectral Width         | 8012.8              |

7.622  
7.580  
7.552  
7.469  
7.465  
7.298  
7.281  
7.270  
7.201  
7.184  
7.166  
7.089  
7.071  
7.053  
6.886  
6.868  
6.770  
6.751  
6.602  
6.598  
6.515  
6.495  
6.358  
6.337  
6.320  
6.295  
6.165  
6.141  
6.039  
6.021

3.204  
3.141  
3.126  
3.049  
2.566  
1.981  
1.897  
1.811  
0.000

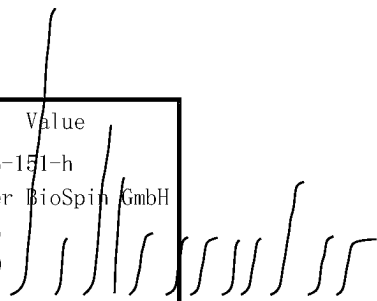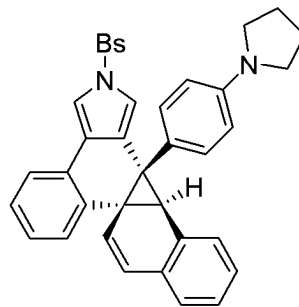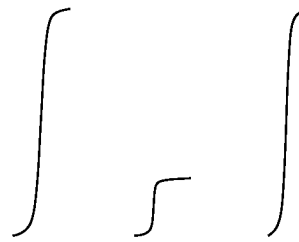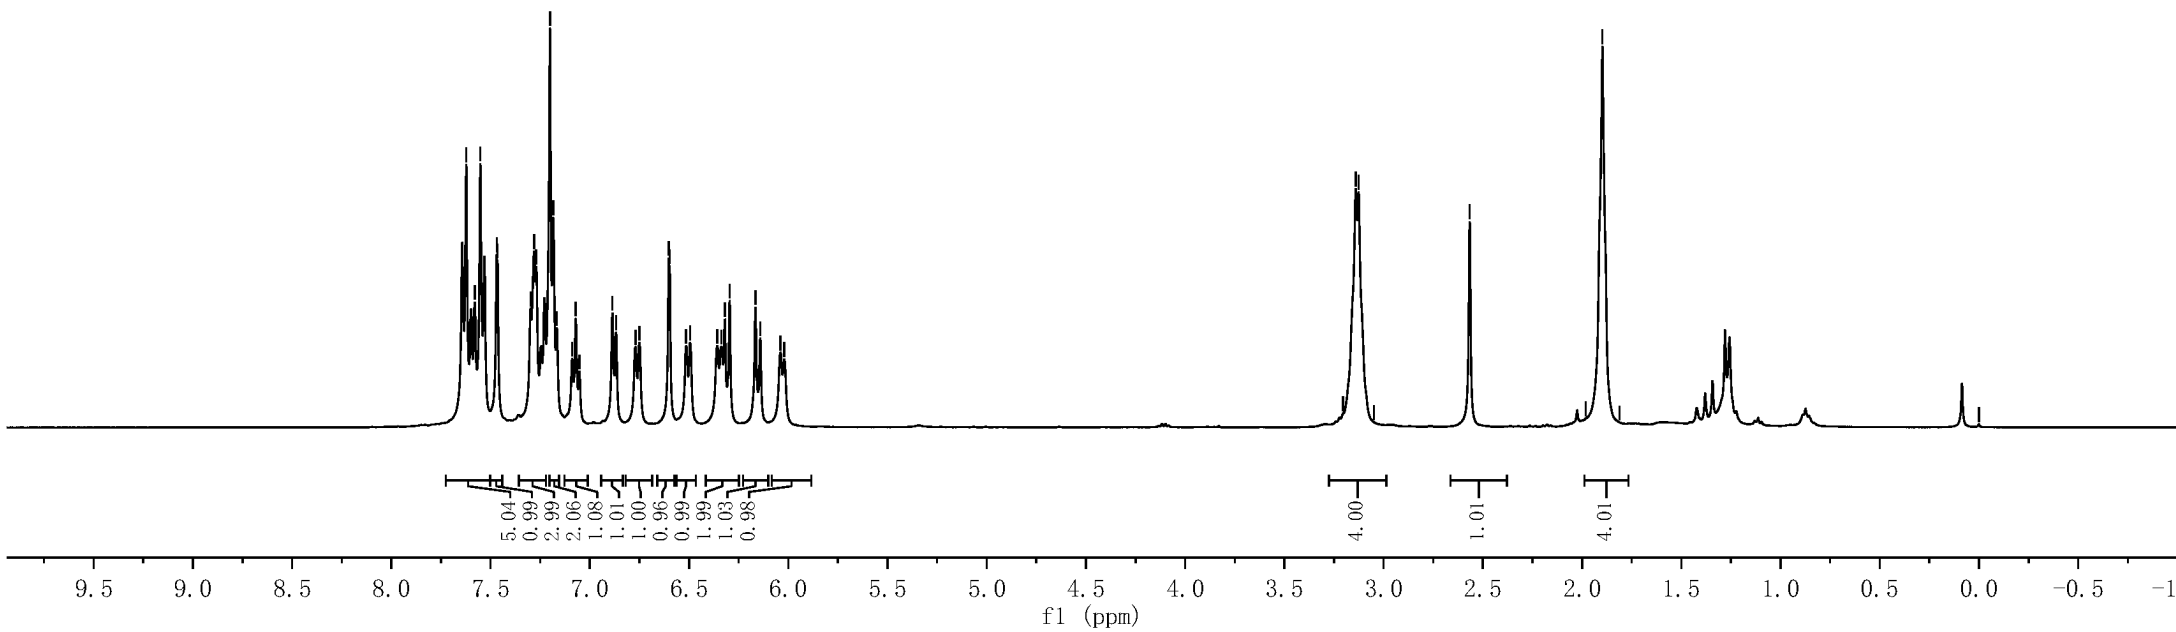

| Parameter                | Value               |
|--------------------------|---------------------|
| 1 Title                  | zyx-3-151-c         |
| 2 Origin                 | Bruker BioSpin GmbH |
| 3 Solvent                | CDCl3               |
| 4 Temperature            | 300.0               |
| 5 Number of Scans        | 53                  |
| 6 Acquisition Time       | 1.3631              |
| 7 Acquisition Date       | 2021-12-03T16:15:32 |
| 8 Spectrometer Frequency | 100.61              |
| 9 Spectral Width         | 24038.5             |



4d

145.99  
132.57  
131.32  
129.88  
128.88  
128.23  
127.47  
127.40  
127.35  
126.04  
126.01  
125.83  
123.87  
113.19  
111.72  
109.54

77.32  
77.00  
76.68

47.36  
41.47  
37.35

27.90  
25.34

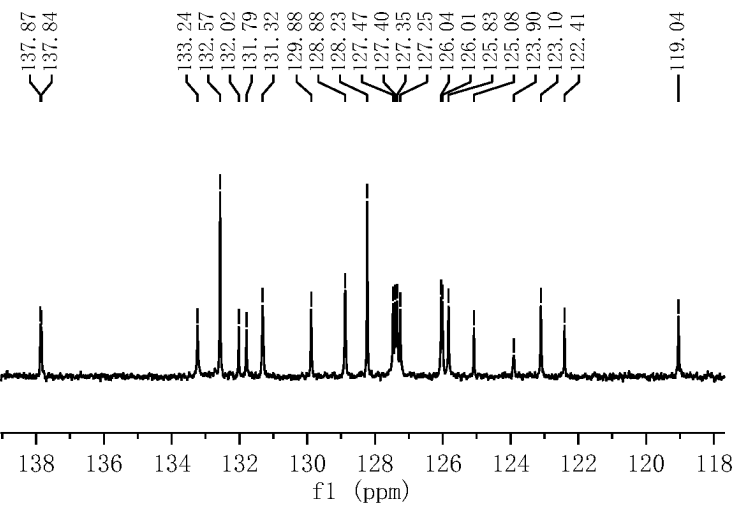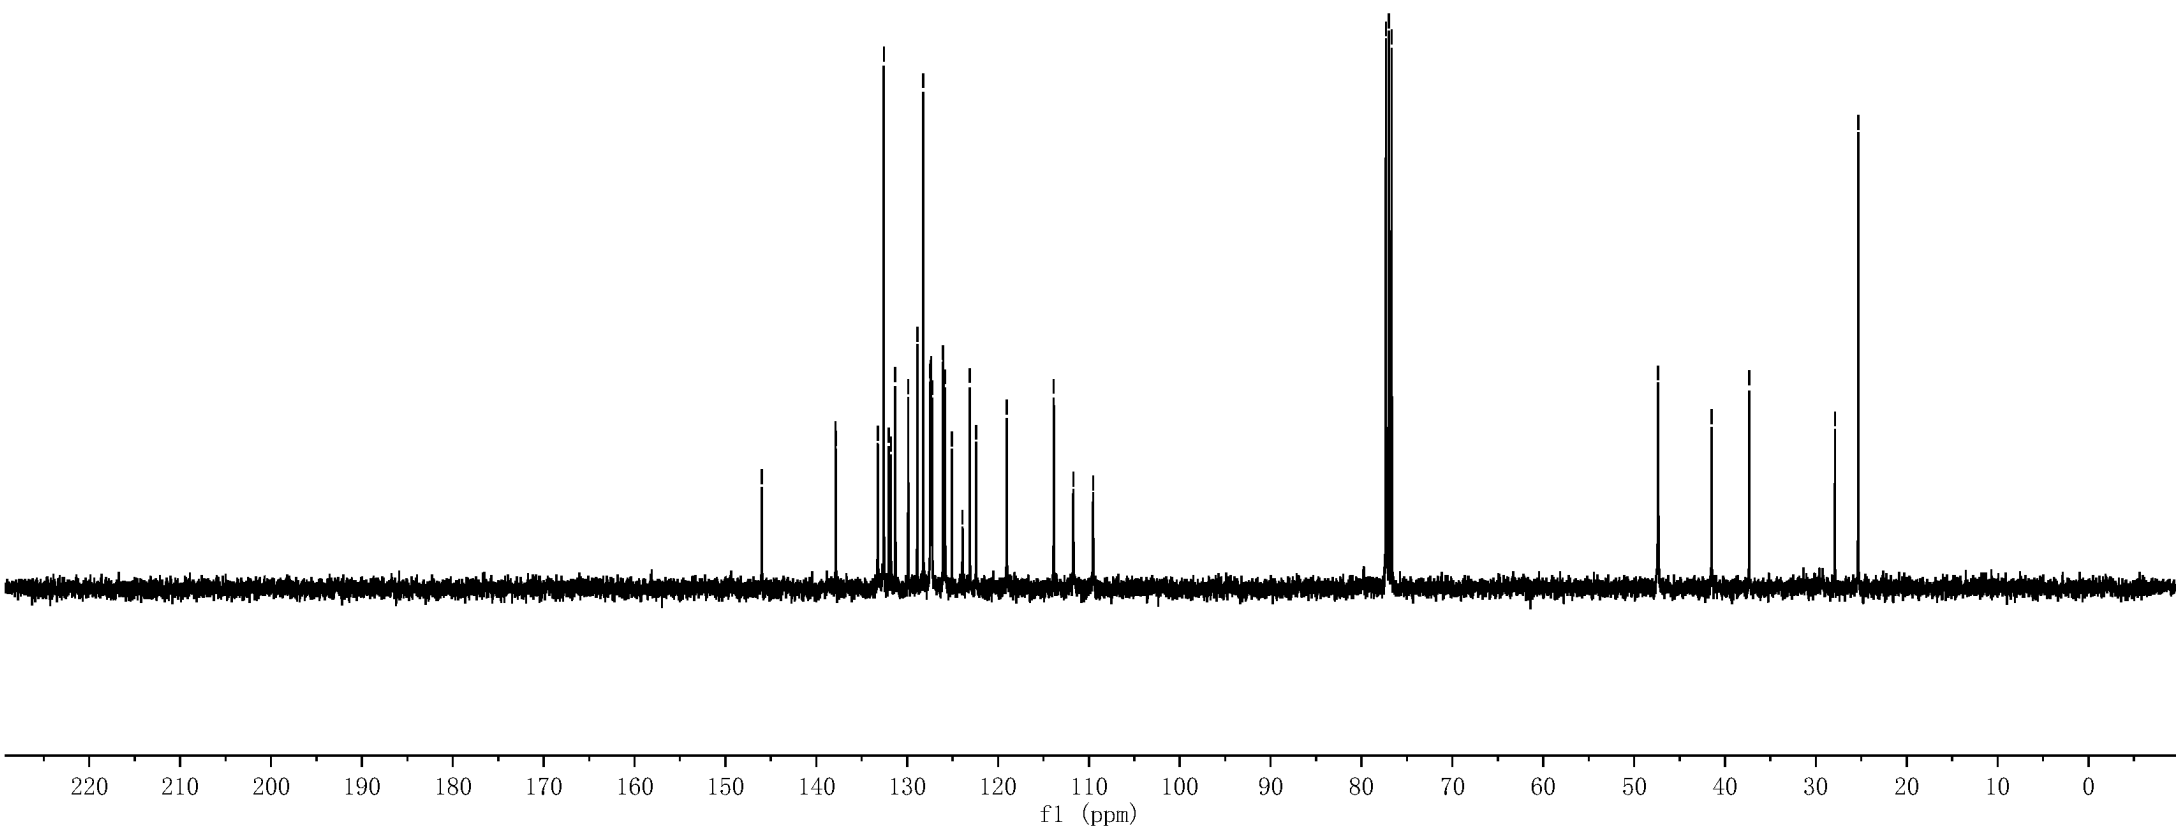

| Parameter                | Value               |
|--------------------------|---------------------|
| 1 Title                  | zyx-3-148h          |
| 2 Origin                 | Bruker BioSpin GmbH |
| 3 Solvent                | CDCl3               |
| 4 Temperature            | 298.0               |
| 5 Number of Scans        | 10                  |
| 6 Acquisition Time       | 4.0894              |
| 7 Acquisition Date       | 2021-12-03T16:05:19 |
| 8 Spectrometer Frequency | 400.13              |
| 9 Spectral Width         | 8012.8              |

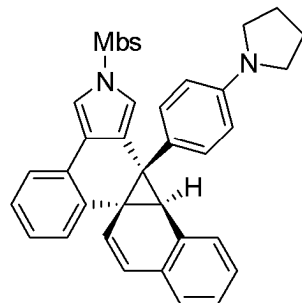

4e

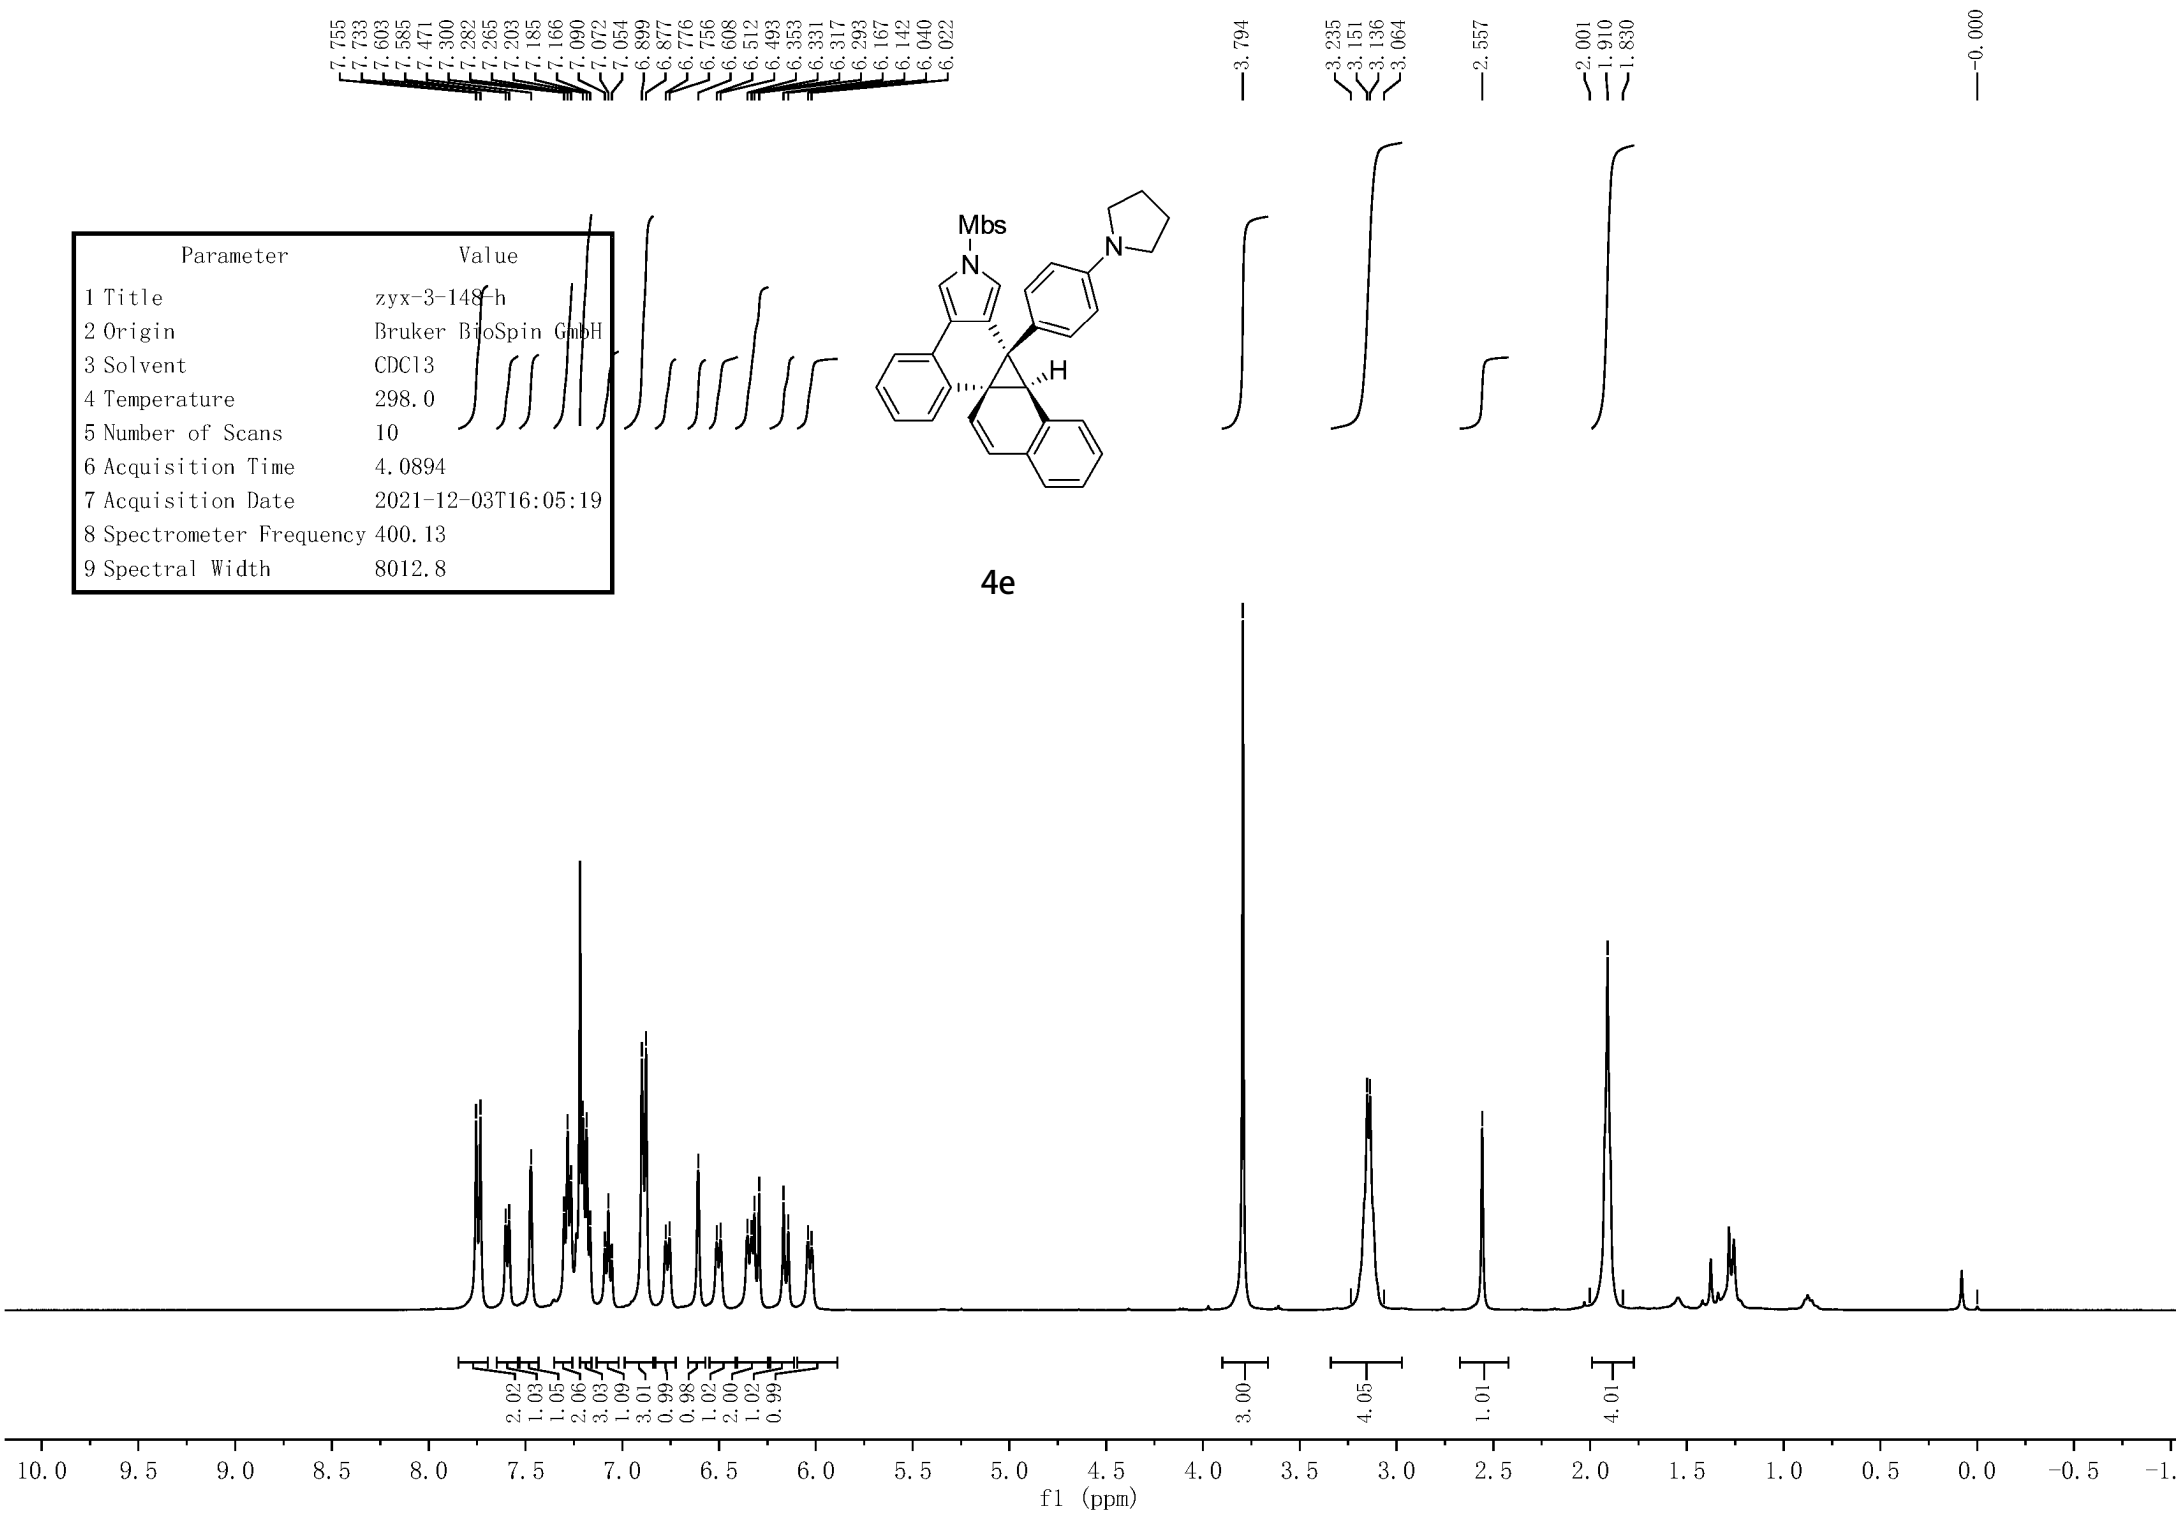

| Parameter                | Value               |
|--------------------------|---------------------|
| 1 Title                  | zyx-3-148-c         |
| 2 Origin                 | Bruker BioSpin GmbH |
| 3 Solvent                | CDCl3               |
| 4 Temperature            | 300.0               |
| 5 Number of Scans        | 56                  |
| 6 Acquisition Time       | 1.3631              |
| 7 Acquisition Date       | 2021-12-03T16:06:56 |
| 8 Spectrometer Frequency | 100.61              |
| 9 Spectral Width         | 24038.5             |

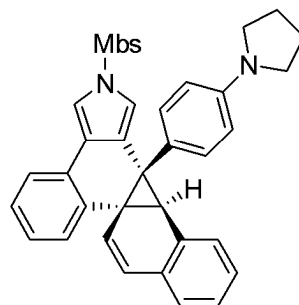

4e

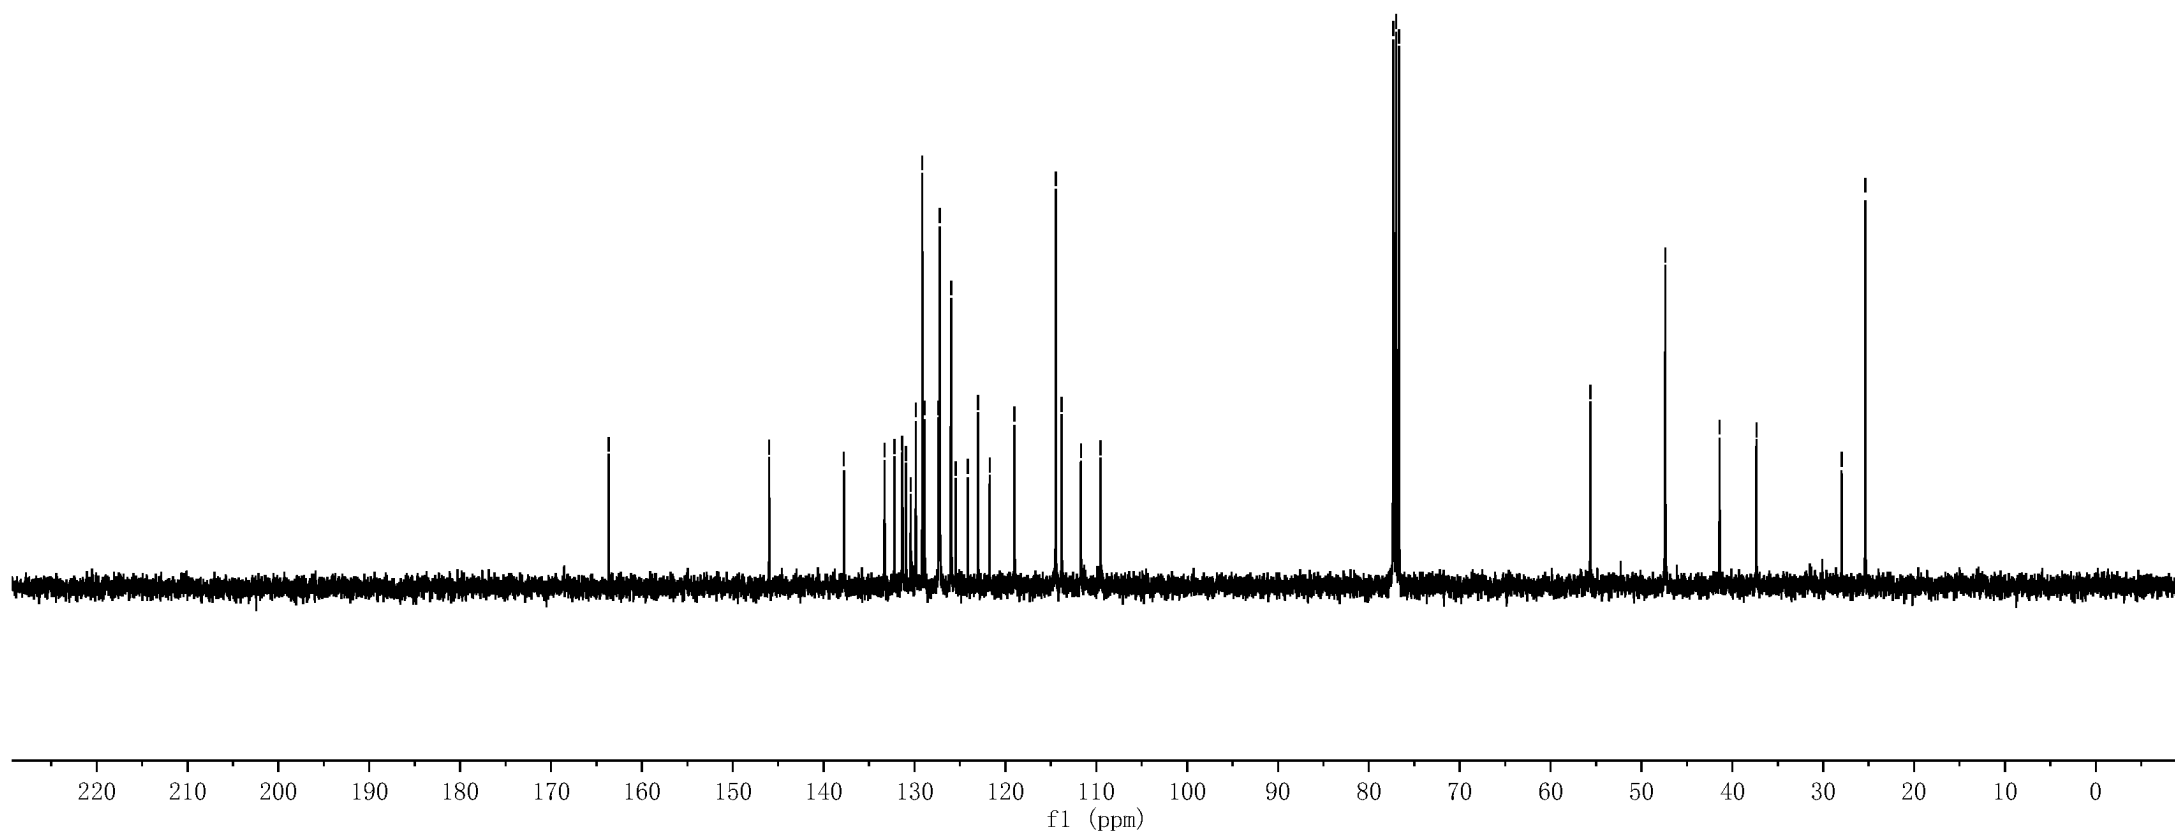

163.65

145.99  
137.77  
133.29  
132.20  
131.37  
131.32  
130.94  
130.42  
129.86  
129.14  
128.88  
127.35  
127.23  
127.20  
126.00  
125.97  
125.46  
124.12  
123.00  
121.73  
118.99  
114.45  
113.81  
111.69  
109.52

77.32  
77.00  
76.68

55.63

47.38

41.41

37.35

27.98

25.36

133.29

132.20

131.37

131.32

130.94

130.42

129.86

129.14

128.88

127.35

127.23

127.20

126.00

125.97

125.46

124.12

123.00

121.73

134 132 130 128 126 124 122  
f1 (ppm)

220 210 200 190 180 170 160 150 140 130 120 110 100 90 80 70 60 50 40 30 20 10 0  
f1 (ppm)

| Parameter                | Value               |
|--------------------------|---------------------|
| 1 Title                  | ZYX-13-4F           |
| 2 Origin                 | Bruker BioSpin GmbH |
| 3 Solvent                | CDC13               |
| 4 Temperature            | 298.0               |
| 5 Number of Scans        | 6                   |
| 6 Acquisition Time       | 4.0894              |
| 7 Acquisition Date       | 2024-06-19T14:40:44 |
| 8 Spectrometer Frequency | 400.13              |
| 9 Spectral Width         | 8012.8              |

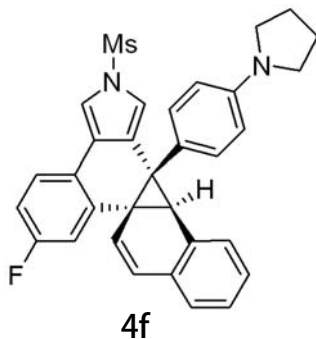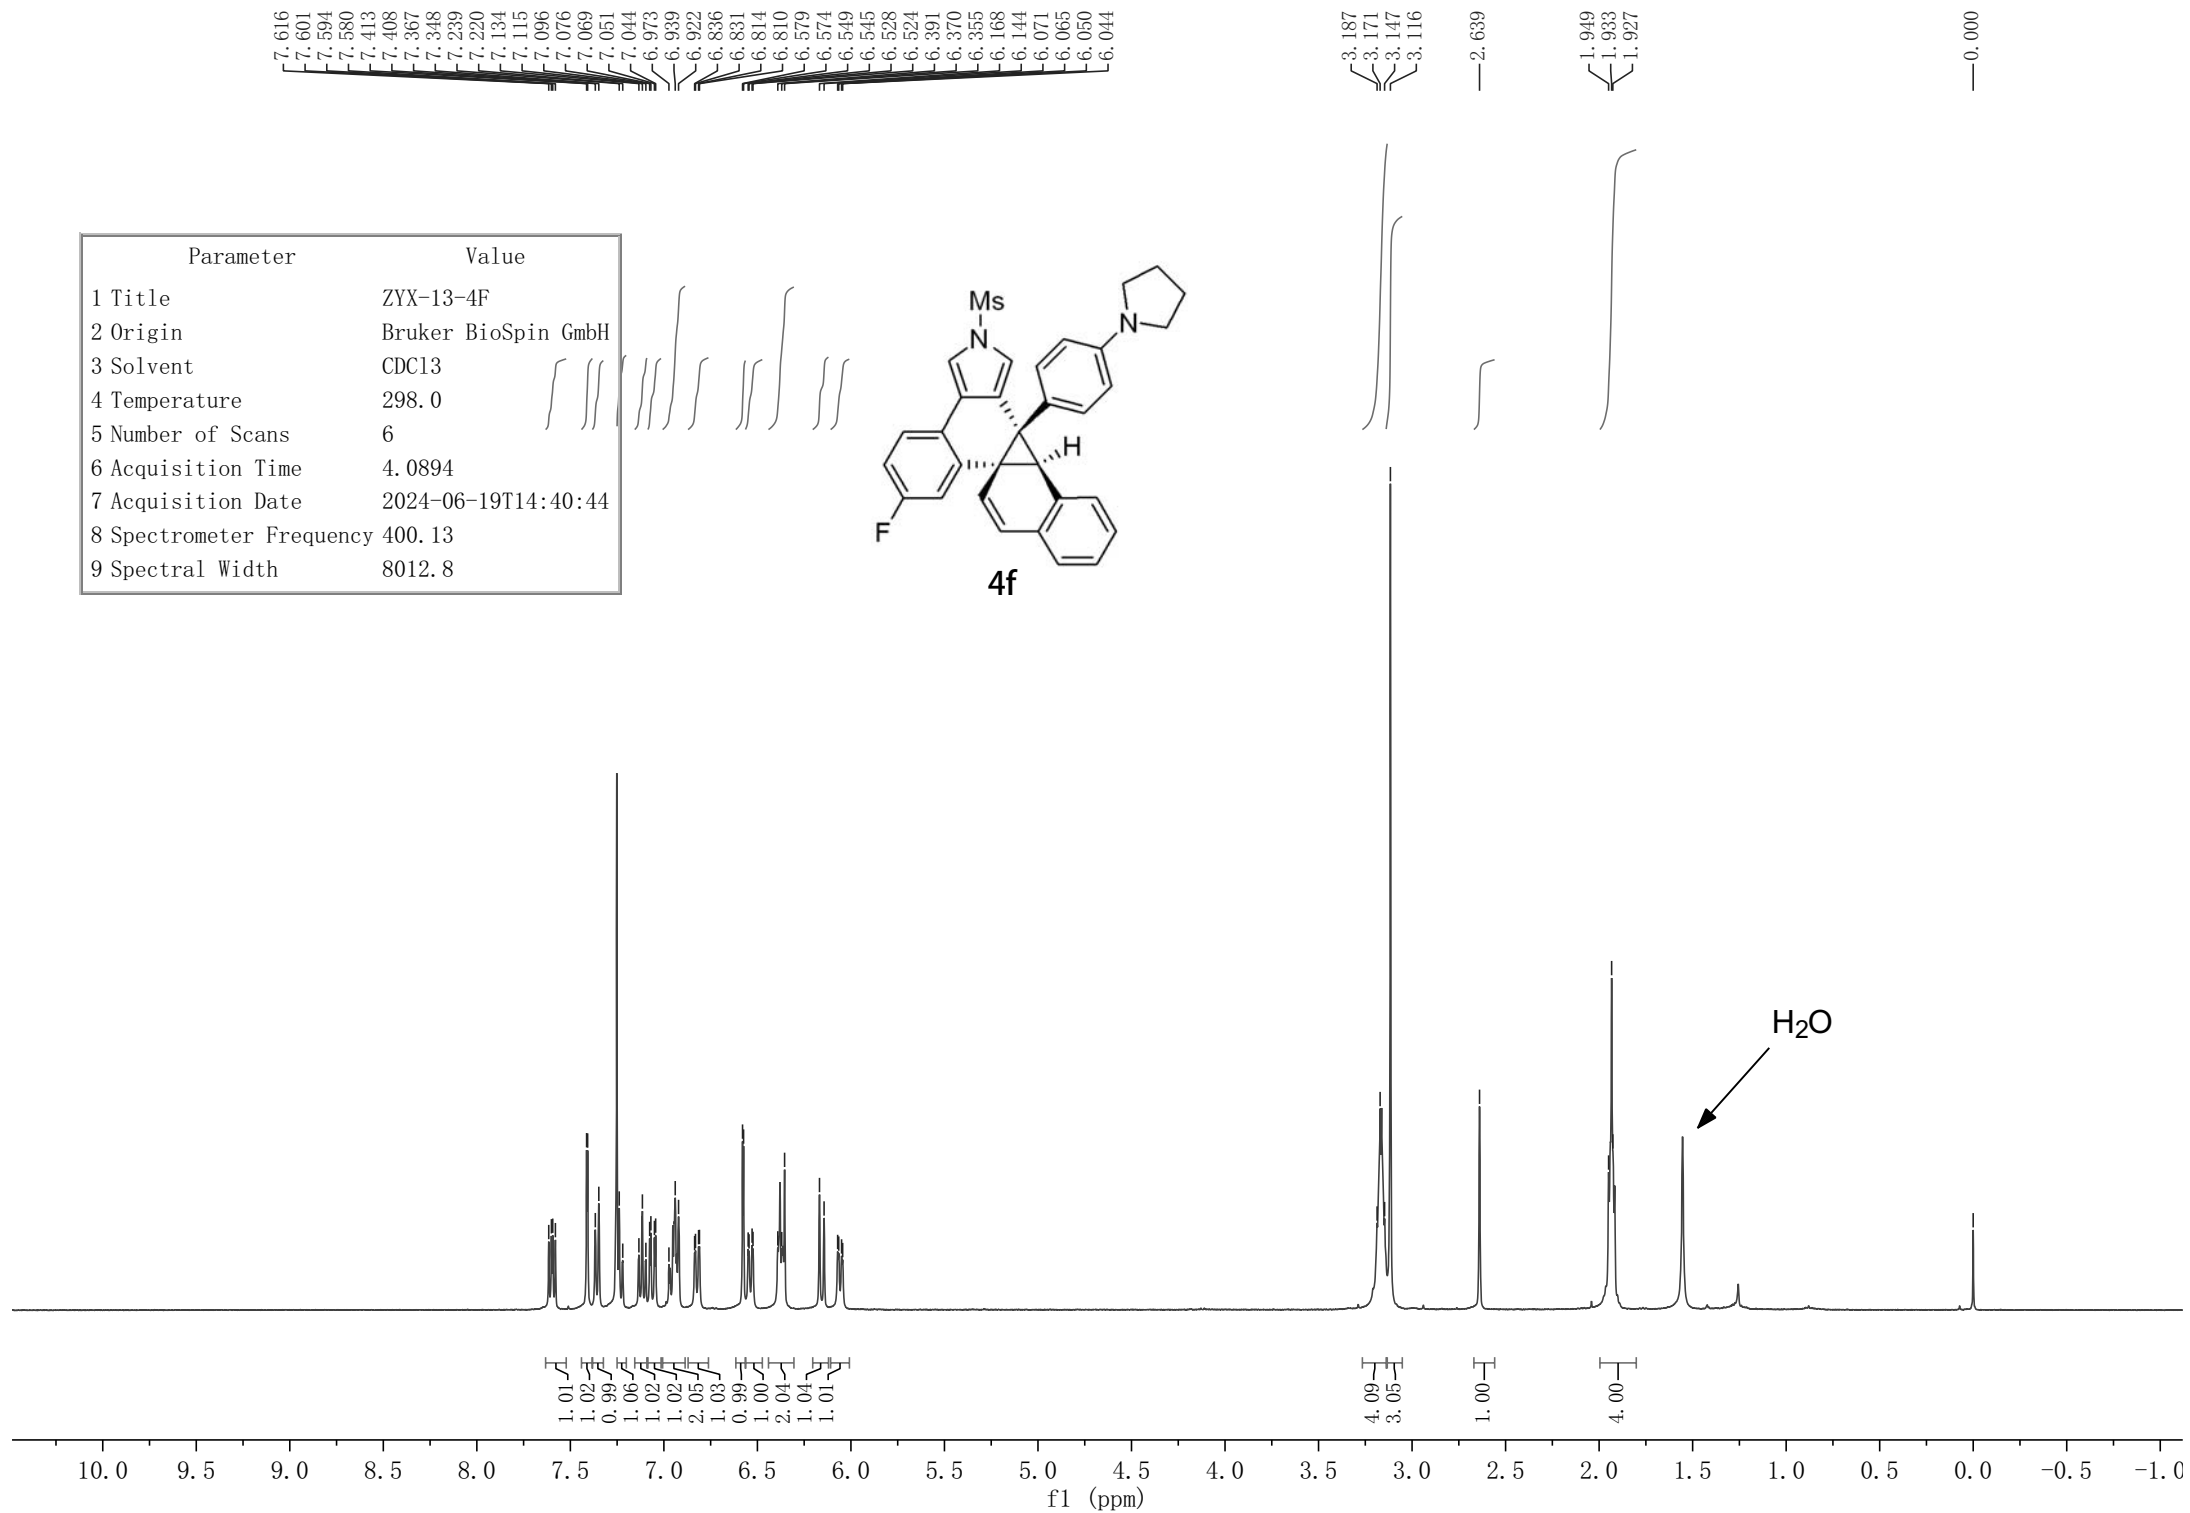

| Parameter                | Value               |
|--------------------------|---------------------|
| 1 Title                  | ZYX-3-215--C        |
| 2 Origin                 | Bruker BioSpin GmbH |
| 3 Solvent                | CDCl3               |
| 4 Temperature            | 300.0               |
| 5 Number of Scans        | 105                 |
| 6 Acquisition Time       | 1.3631              |
| 7 Acquisition Date       | 2021-12-25T16:44:02 |
| 8 Spectrometer Frequency | 100.61              |
| 9 Spectral Width         | 24038.5             |

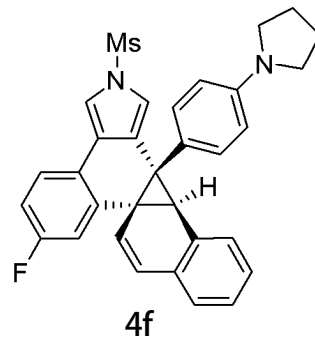

163.45  
161.00  
146.11  
140.35  
140.28  
133.22  
131.79  
131.33  
131.15  
130.80  
128.89  
127.89  
127.63  
127.42  
126.21  
125.02  
124.73  
124.65  
124.42  
123.62  
121.50  
120.91  
118.80  
116.67  
116.44  
113.43  
113.30  
113.22  
111.66  
109.67  
77.00  
76.68

47.36  
42.68  
41.50  
37.25  
28.07  
25.37

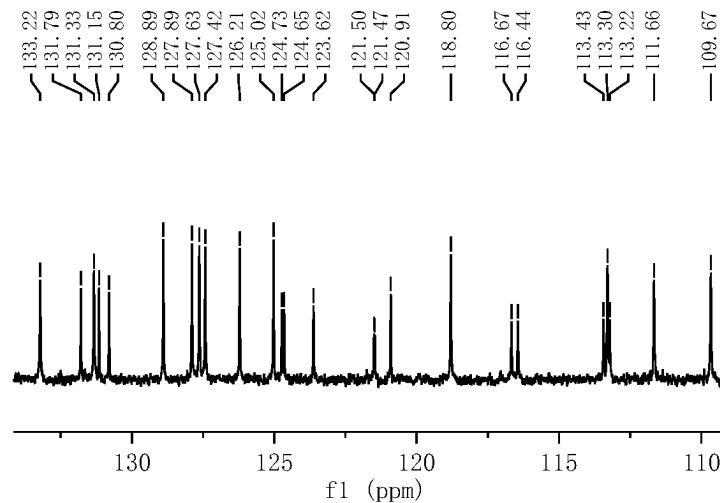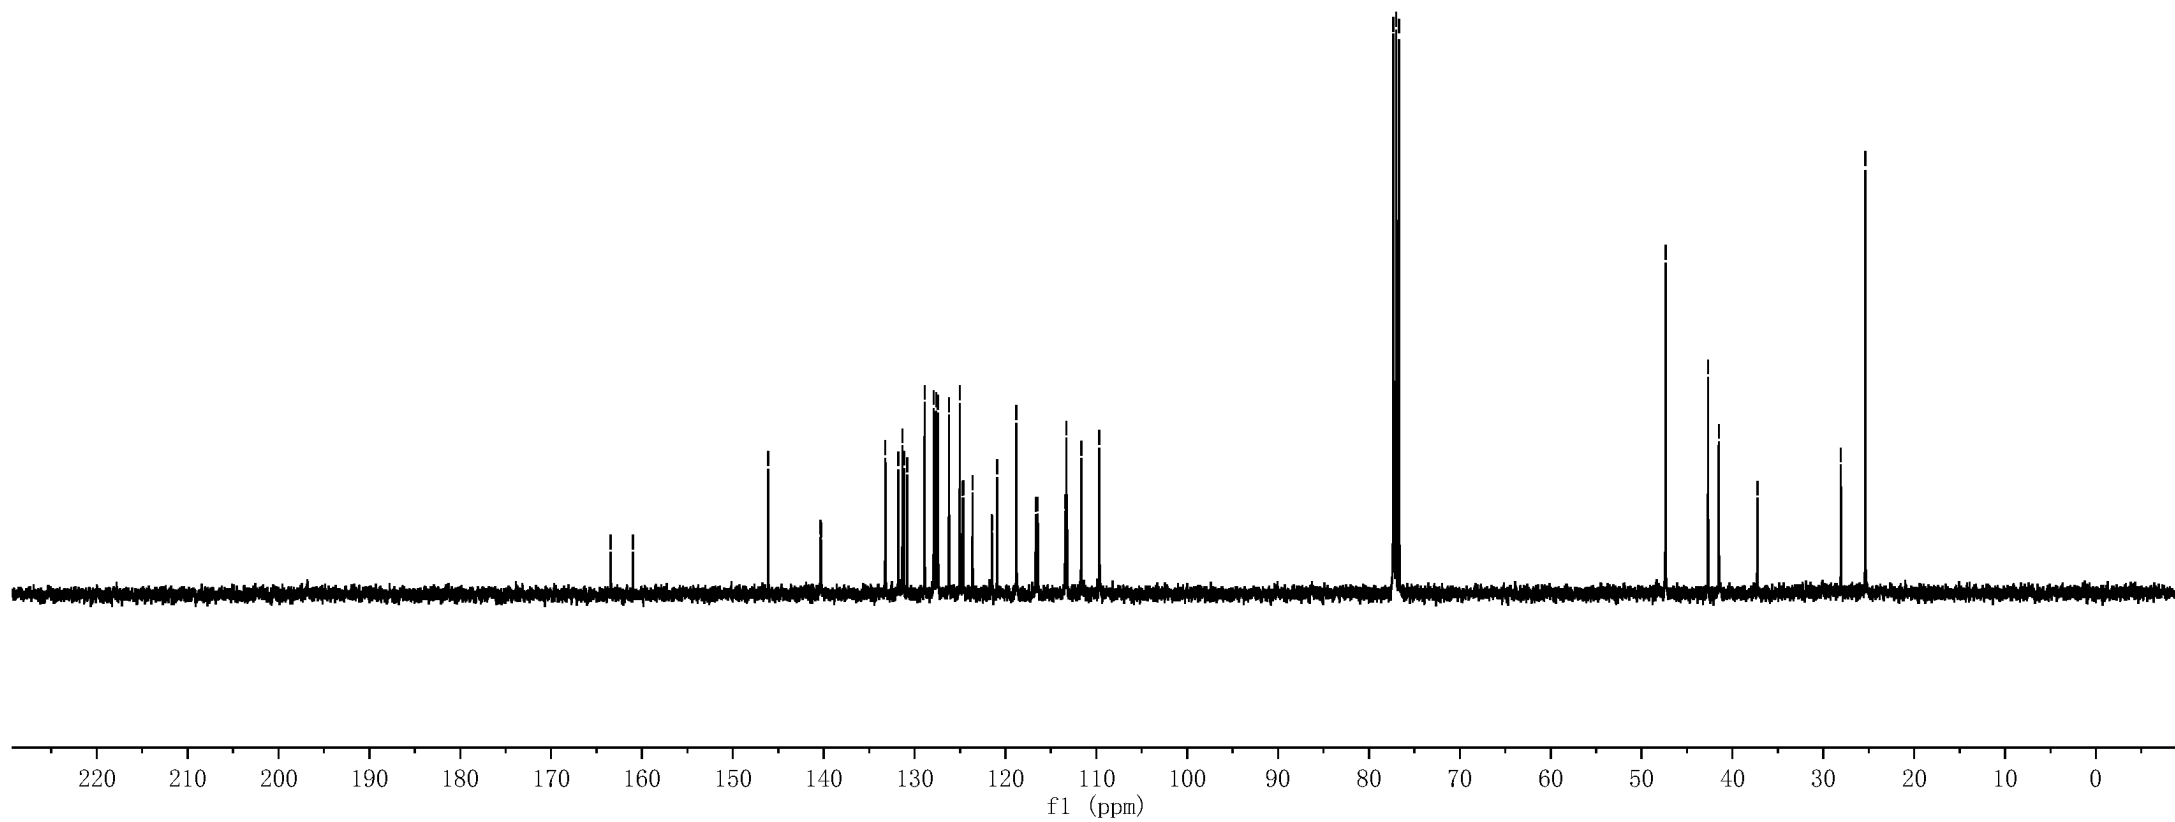



| Parameter                | Value               |
|--------------------------|---------------------|
| 1 Title                  | zyx-3-215-f         |
| 2 Origin                 | Bruker BioSpin GmbH |
| 3 Solvent                | CDCl3               |
| 4 Temperature            | 295.5               |
| 5 Number of Scans        | 16                  |
| 6 Acquisition Time       | 0.7340              |
| 7 Acquisition Date       | 2022-01-19T11:00:19 |
| 8 Spectrometer Frequency | 376.31              |
| 9 Spectral Width         | 89285.7             |

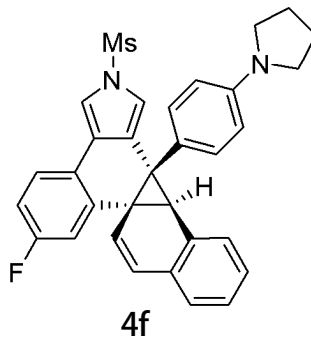

—114.03

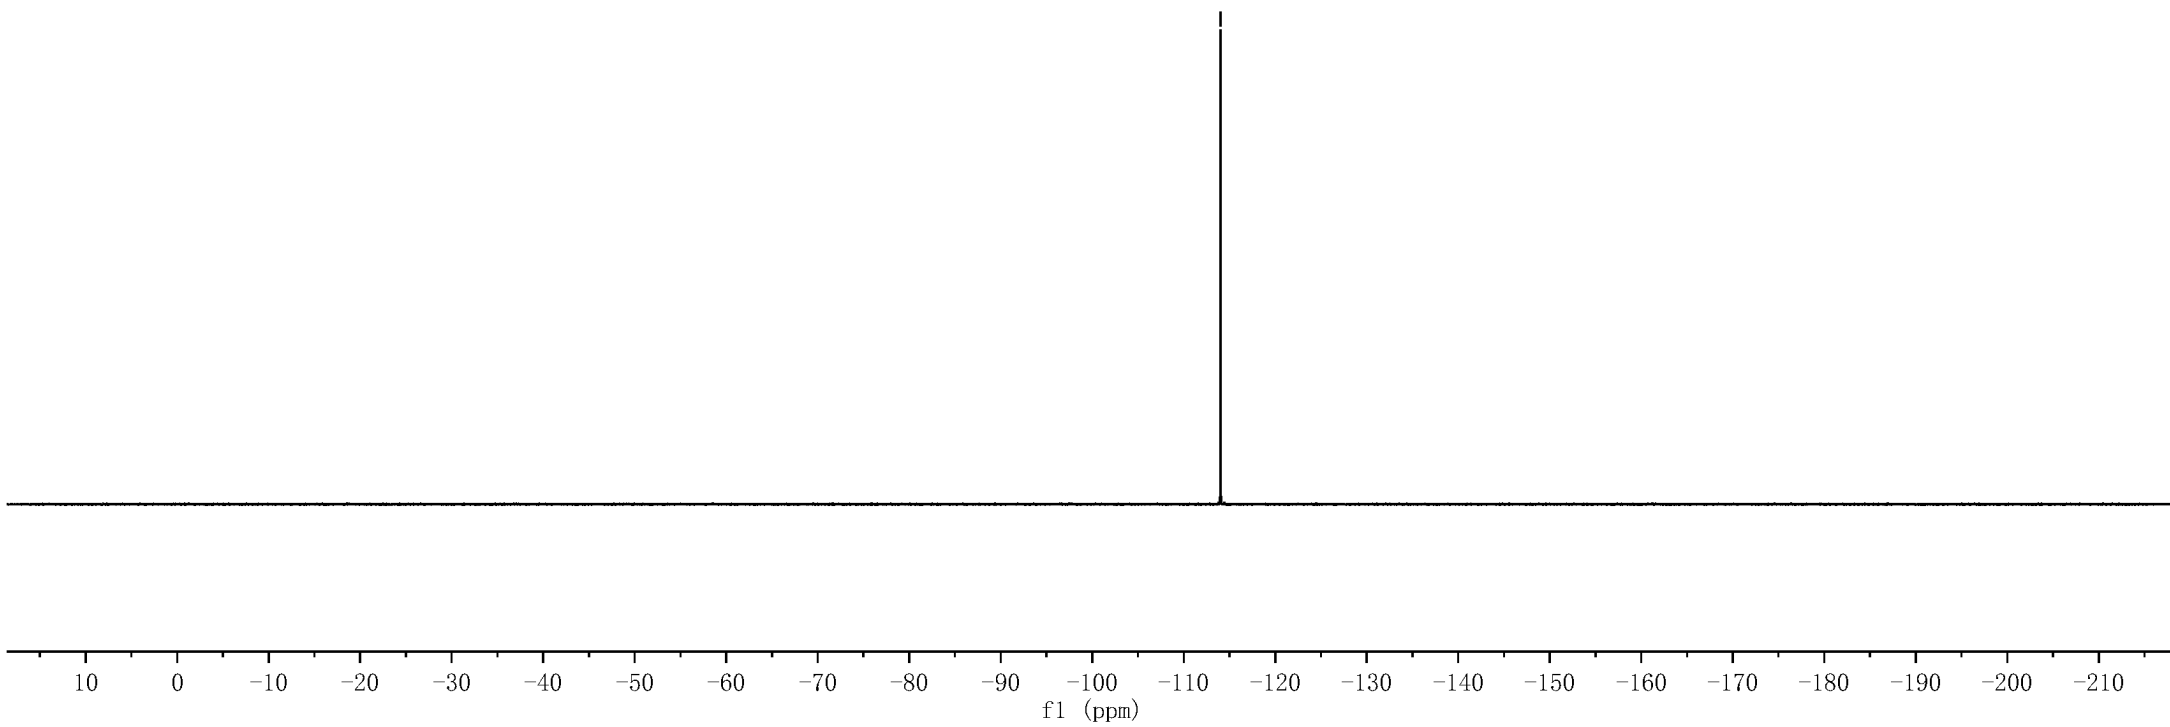

| Parameter                | Value               |
|--------------------------|---------------------|
| 1 Title                  | ZYX-3-214--H        |
| 2 Origin                 | Bruker BioSpin GmbH |
| 3 Solvent                | CDC13               |
| 4 Temperature            | 295.4               |
| 5 Number of Scans        | 12                  |
| 6 Acquisition Time       | 3.9846              |
| 7 Acquisition Date       | 2022-01-01T15:02:36 |
| 8 Spectrometer Frequency | 399.93              |
| 9 Spectral Width         | 8223.7              |

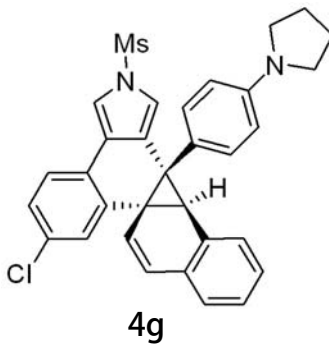

7.558  
7.538  
7.445  
7.440  
7.353  
7.335  
7.319  
7.314  
7.250  
7.232  
7.210  
7.189  
7.126  
7.105  
6.926  
6.908  
6.825  
6.820  
6.804  
6.799  
6.583  
6.578  
6.549  
6.545  
6.528  
6.524  
6.374  
6.360  
6.349  
6.166  
6.142  
6.066  
6.061  
6.045

3.176  
3.161  
3.151  
3.135  
3.108  
— 2.620  
1.938  
1.922  
1.906

— 0.000

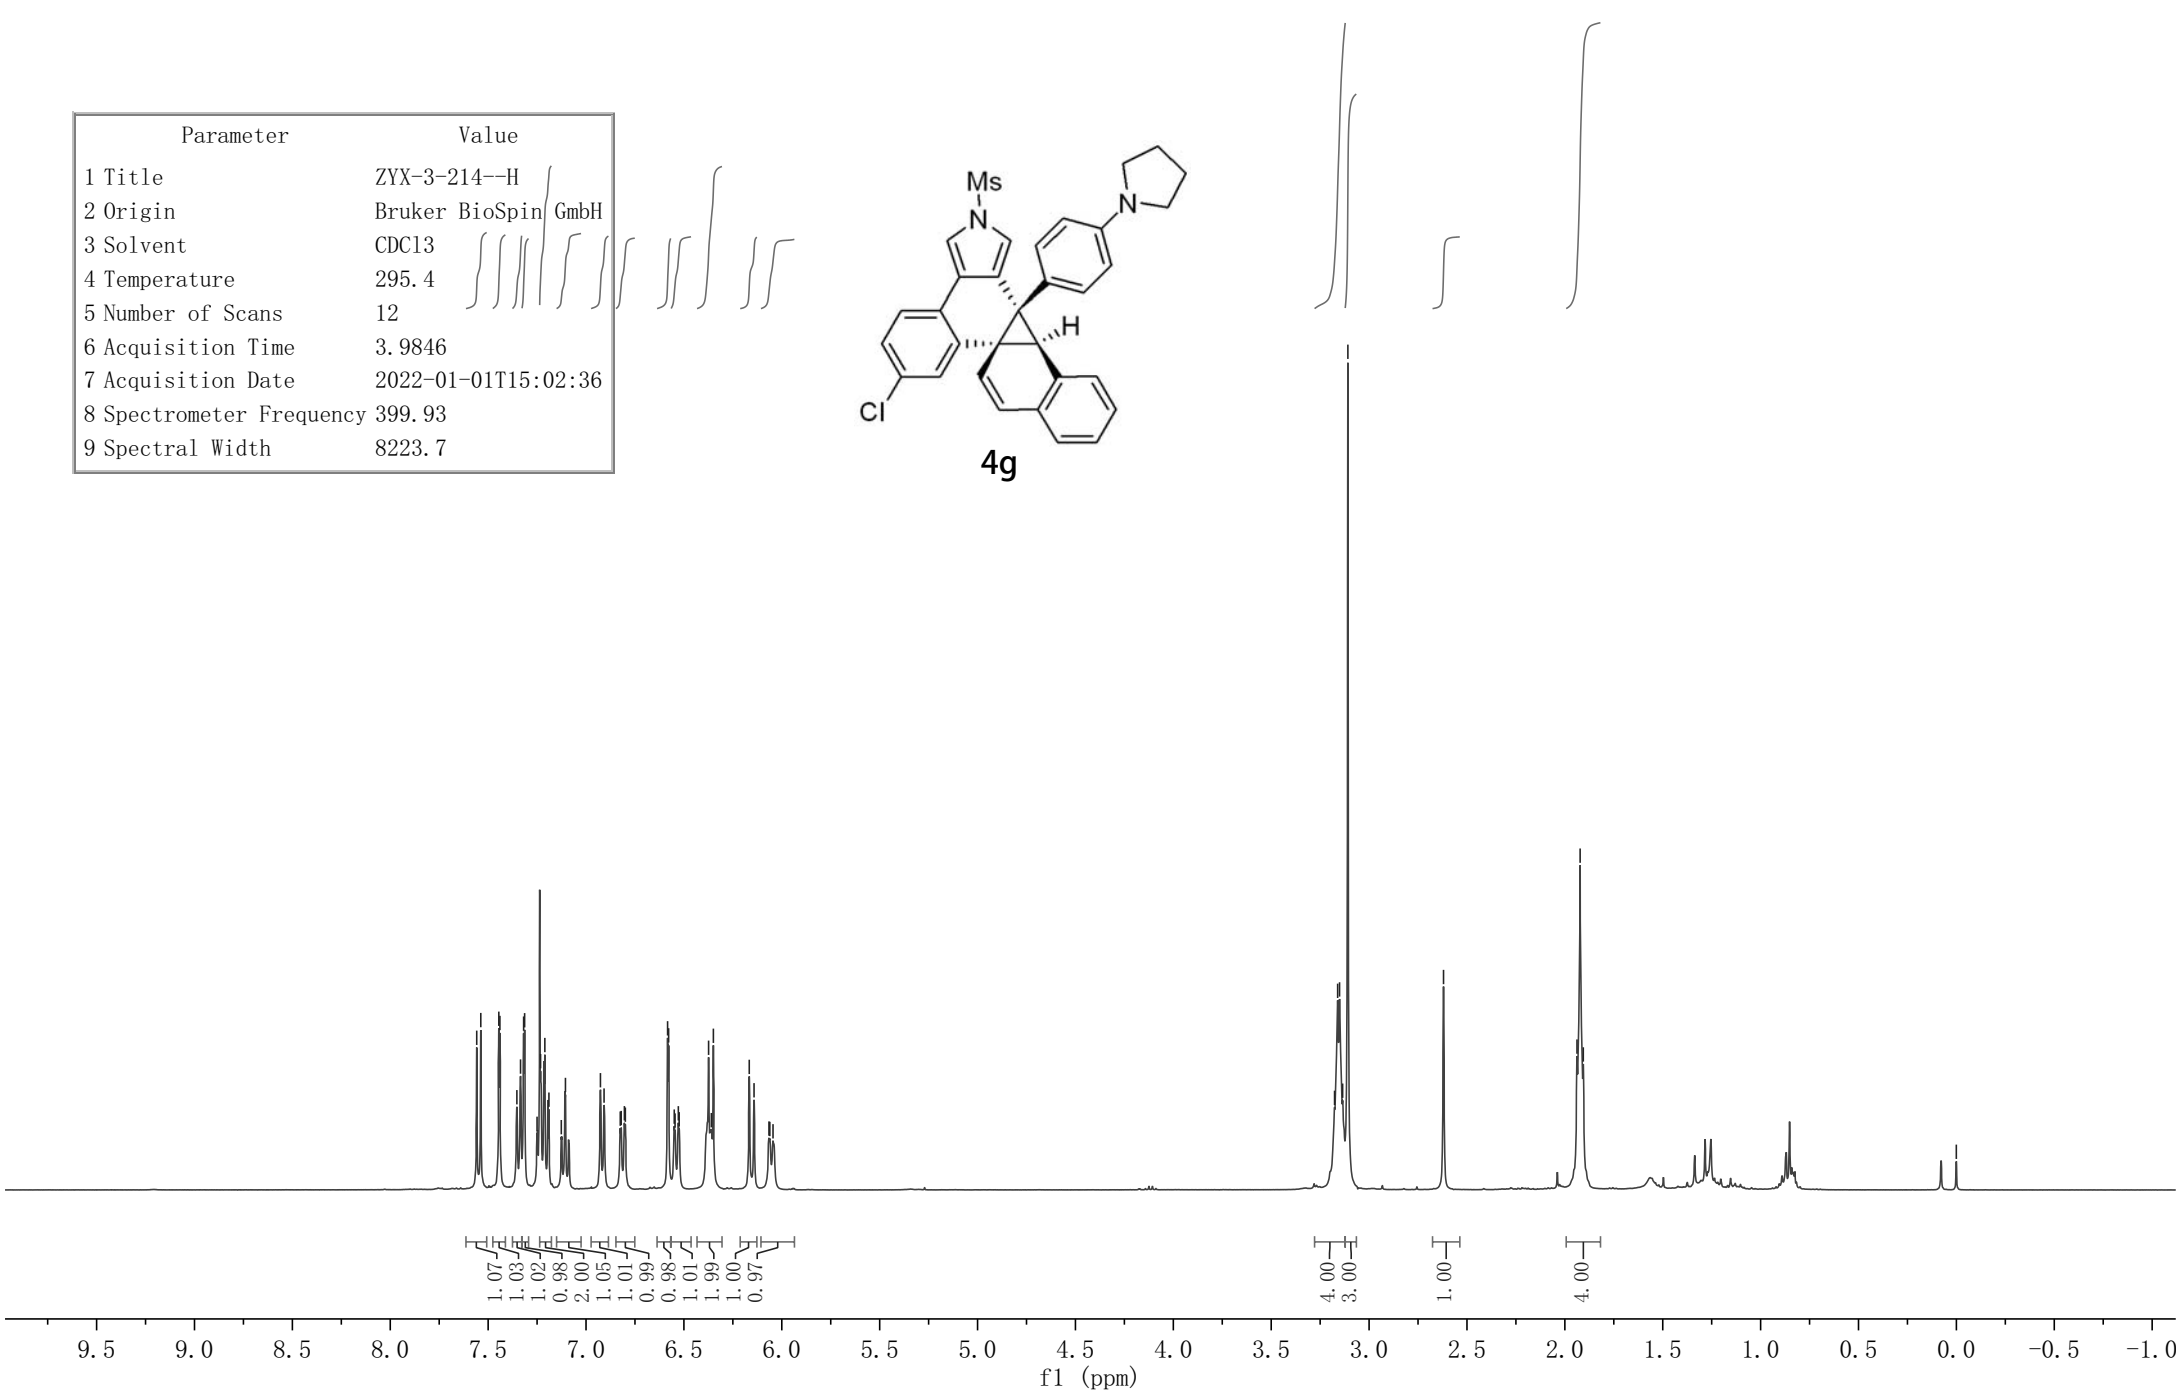

| Parameter                | Value               |
|--------------------------|---------------------|
| 1 Title                  | ZYX-3-214-C         |
| 2 Origin                 | Bruker BioSpin GmbH |
| 3 Solvent                | CDCl3               |
| 4 Temperature            | 300.0               |
| 5 Number of Scans        | 61                  |
| 6 Acquisition Time       | 1.3631              |
| 7 Acquisition Date       | 2021-12-25T16:34:38 |
| 8 Spectrometer Frequency | 100.61              |
| 9 Spectral Width         | 24038.5             |

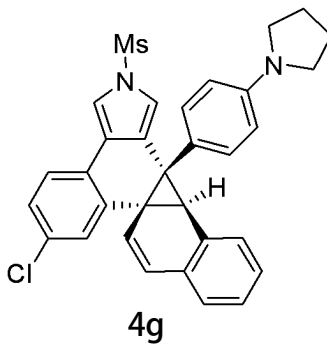

146.09  
139.69  
129.91  
128.90  
127.89  
127.65  
127.43  
126.27  
126.24  
125.01  
124.81  
111.67  
109.66

77.32  
77.00  
76.68

47.36  
42.73  
41.39  
37.03

28.03  
25.36

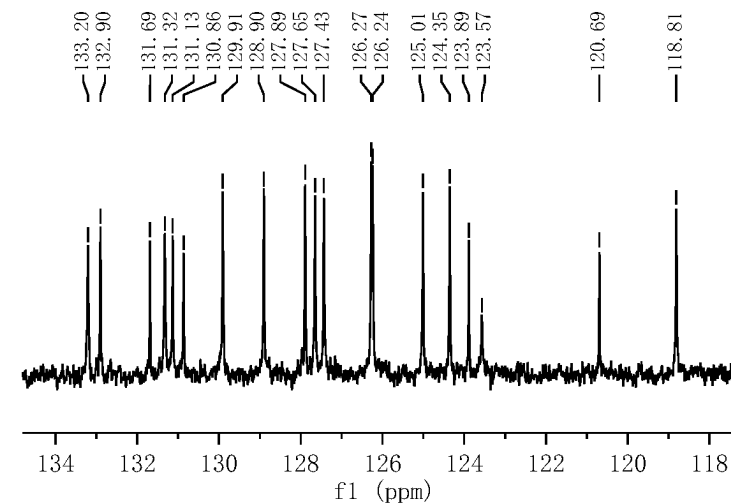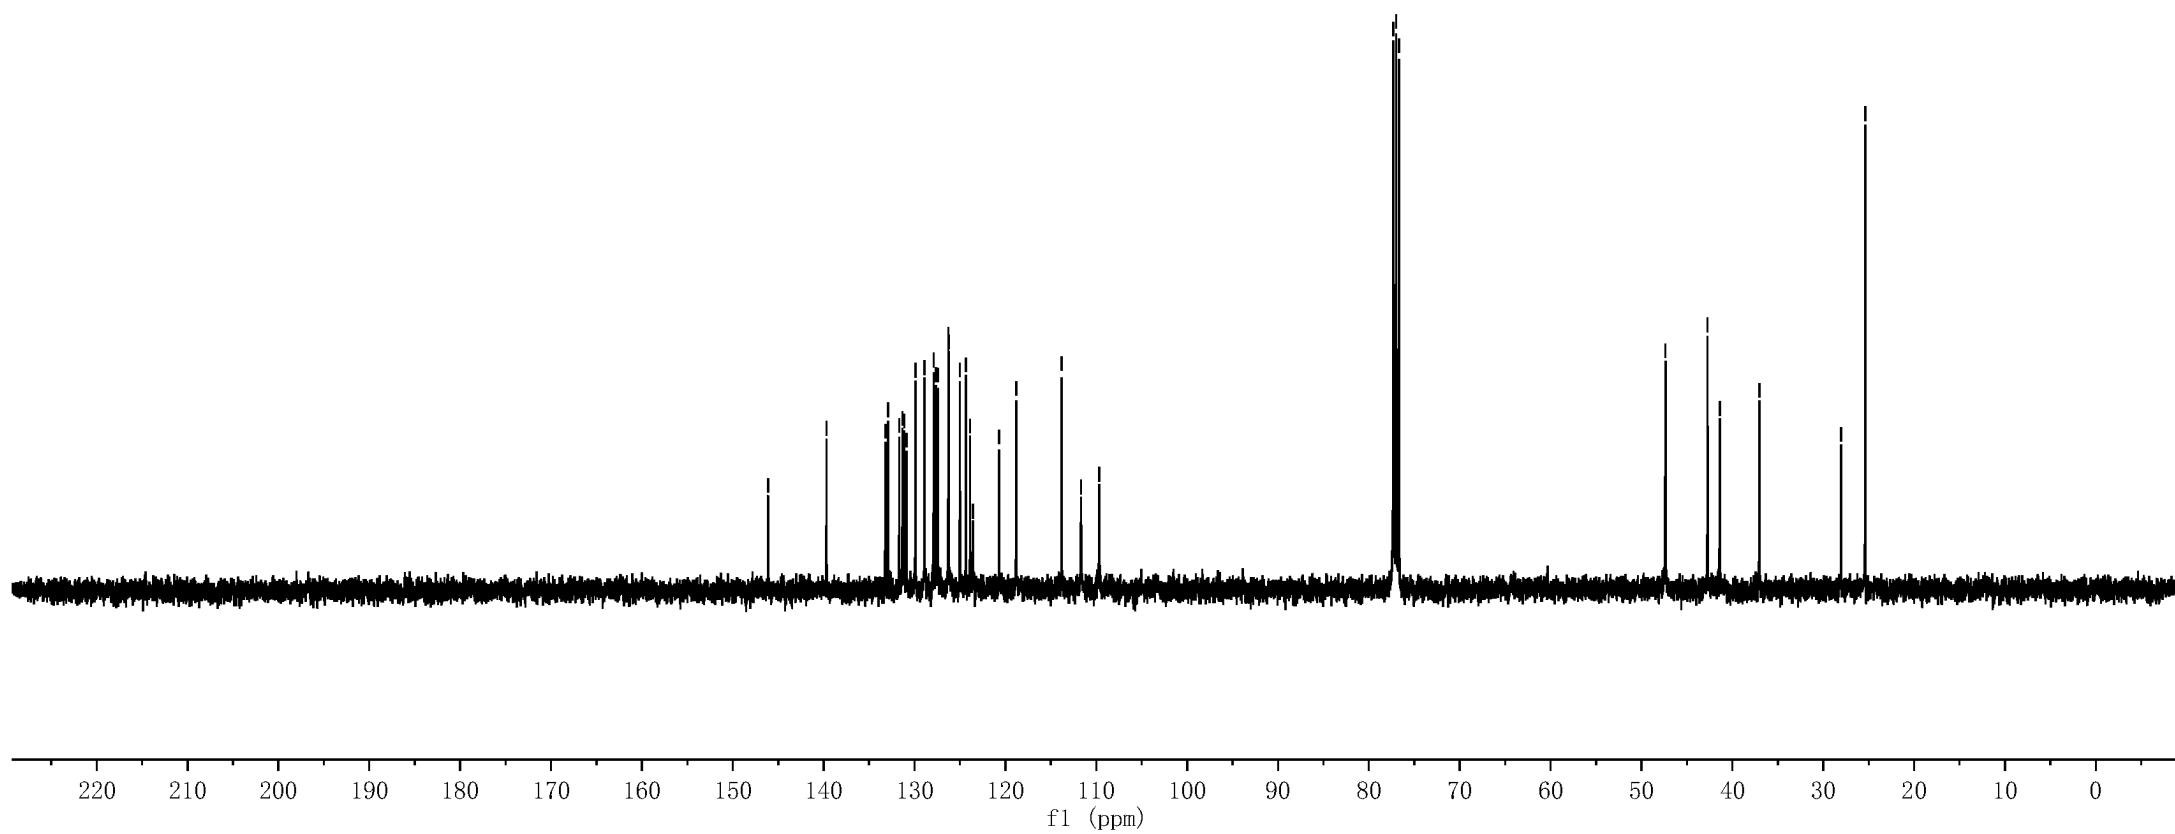

| Parameter                | Value               |
|--------------------------|---------------------|
| 1 Title                  | zyx-3-206---h       |
| 2 Origin                 | Bruker BioSpin GmbH |
| 3 Solvent                | CDC13               |
| 4 Temperature            | 298.0               |
| 5 Number of Scans        | 15                  |
| 6 Acquisition Time       | 4.0894              |
| 7 Acquisition Date       | 2021-12-23T16:31:47 |
| 8 Spectrometer Frequency | 400.13              |
| 9 Spectral Width         | 8012.8              |

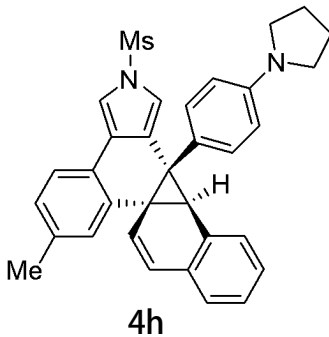

7.549  
7.529  
7.420  
7.414  
7.354  
7.336  
7.219  
7.203  
7.200  
7.149  
7.119  
7.098  
7.073  
7.053  
6.930  
6.912  
6.839  
6.834  
6.818  
6.813  
6.561  
6.555  
6.527  
6.389  
6.367  
6.343  
6.236  
6.212  
6.068  
6.062  
6.047  
6.041

3.184  
3.168  
3.160  
3.096  
2.613  
2.360  
1.944  
1.928  
1.912  
0.000

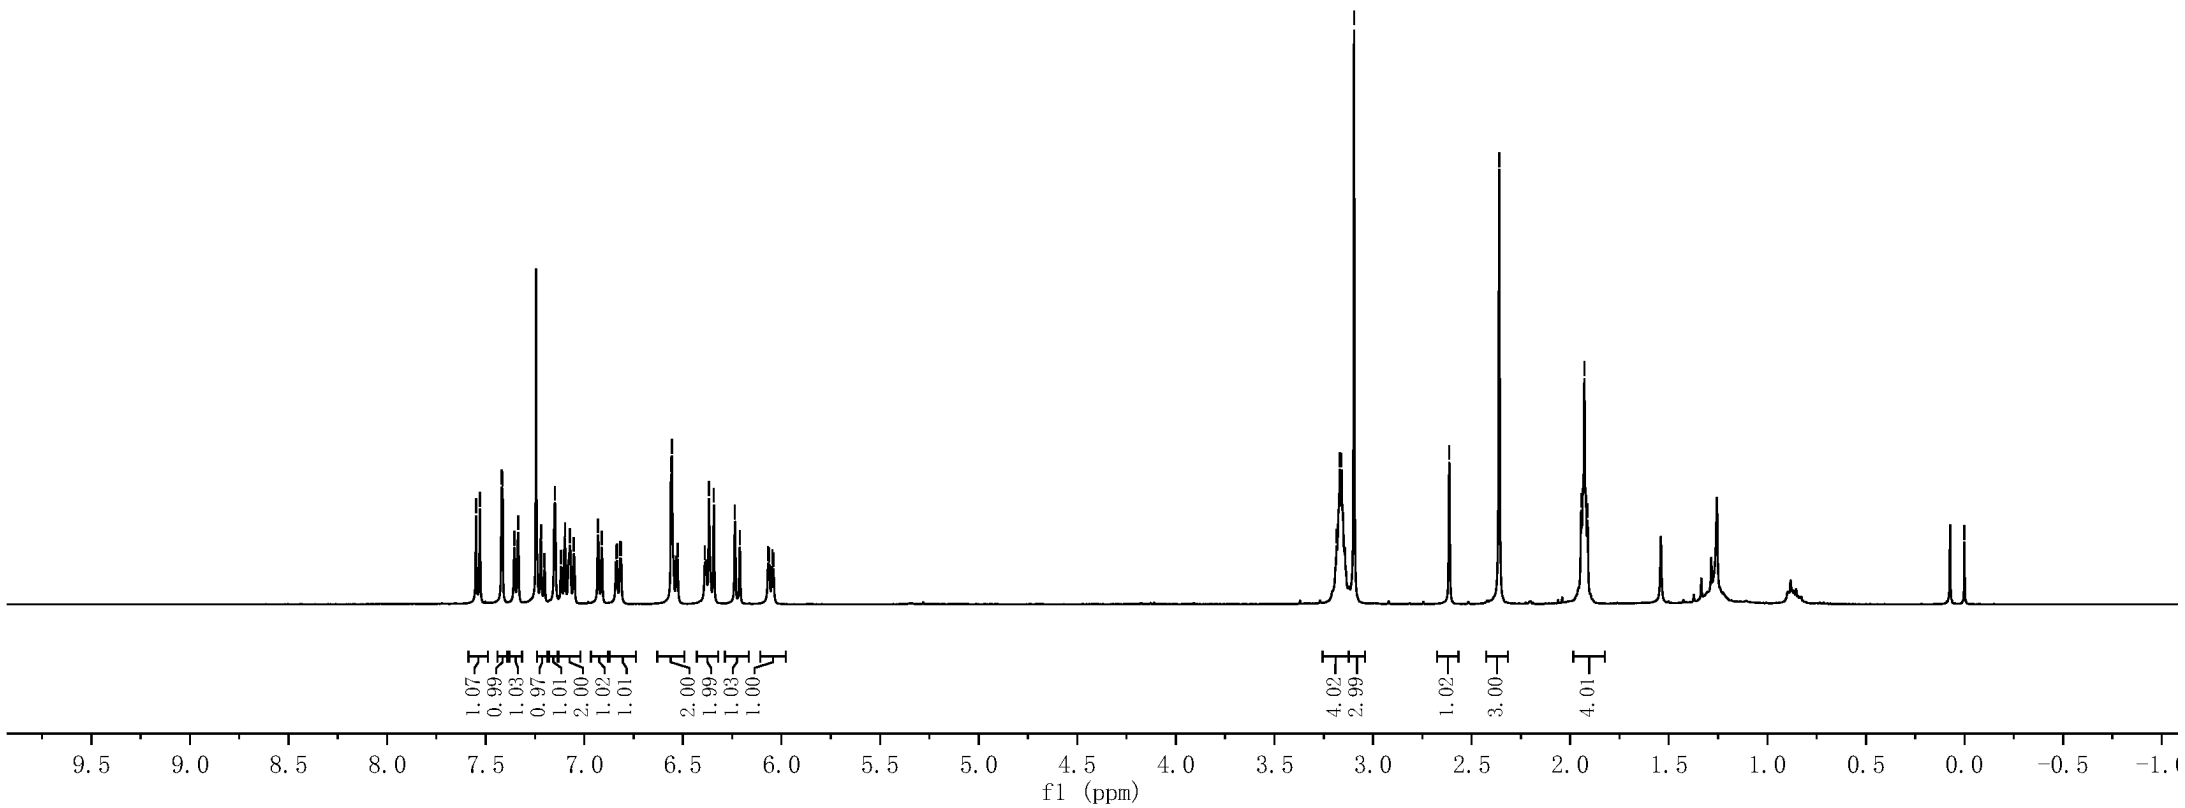

| Parameter                | Value               |
|--------------------------|---------------------|
| 1 Title                  | zyx-3-206---c       |
| 2 Origin                 | Bruker BioSpin GmbH |
| 3 Solvent                | CDCl3               |
| 4 Temperature            | 300.0               |
| 5 Number of Scans        | 133                 |
| 6 Acquisition Time       | 1.3631              |
| 7 Acquisition Date       | 2021-12-23T16:33:53 |
| 8 Spectrometer Frequency | 100.61              |
| 9 Spectral Width         | 24038.5             |

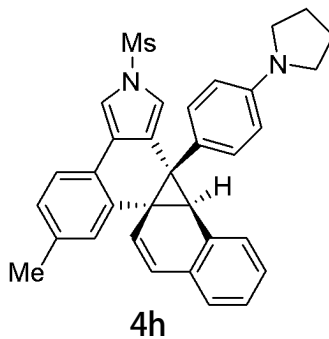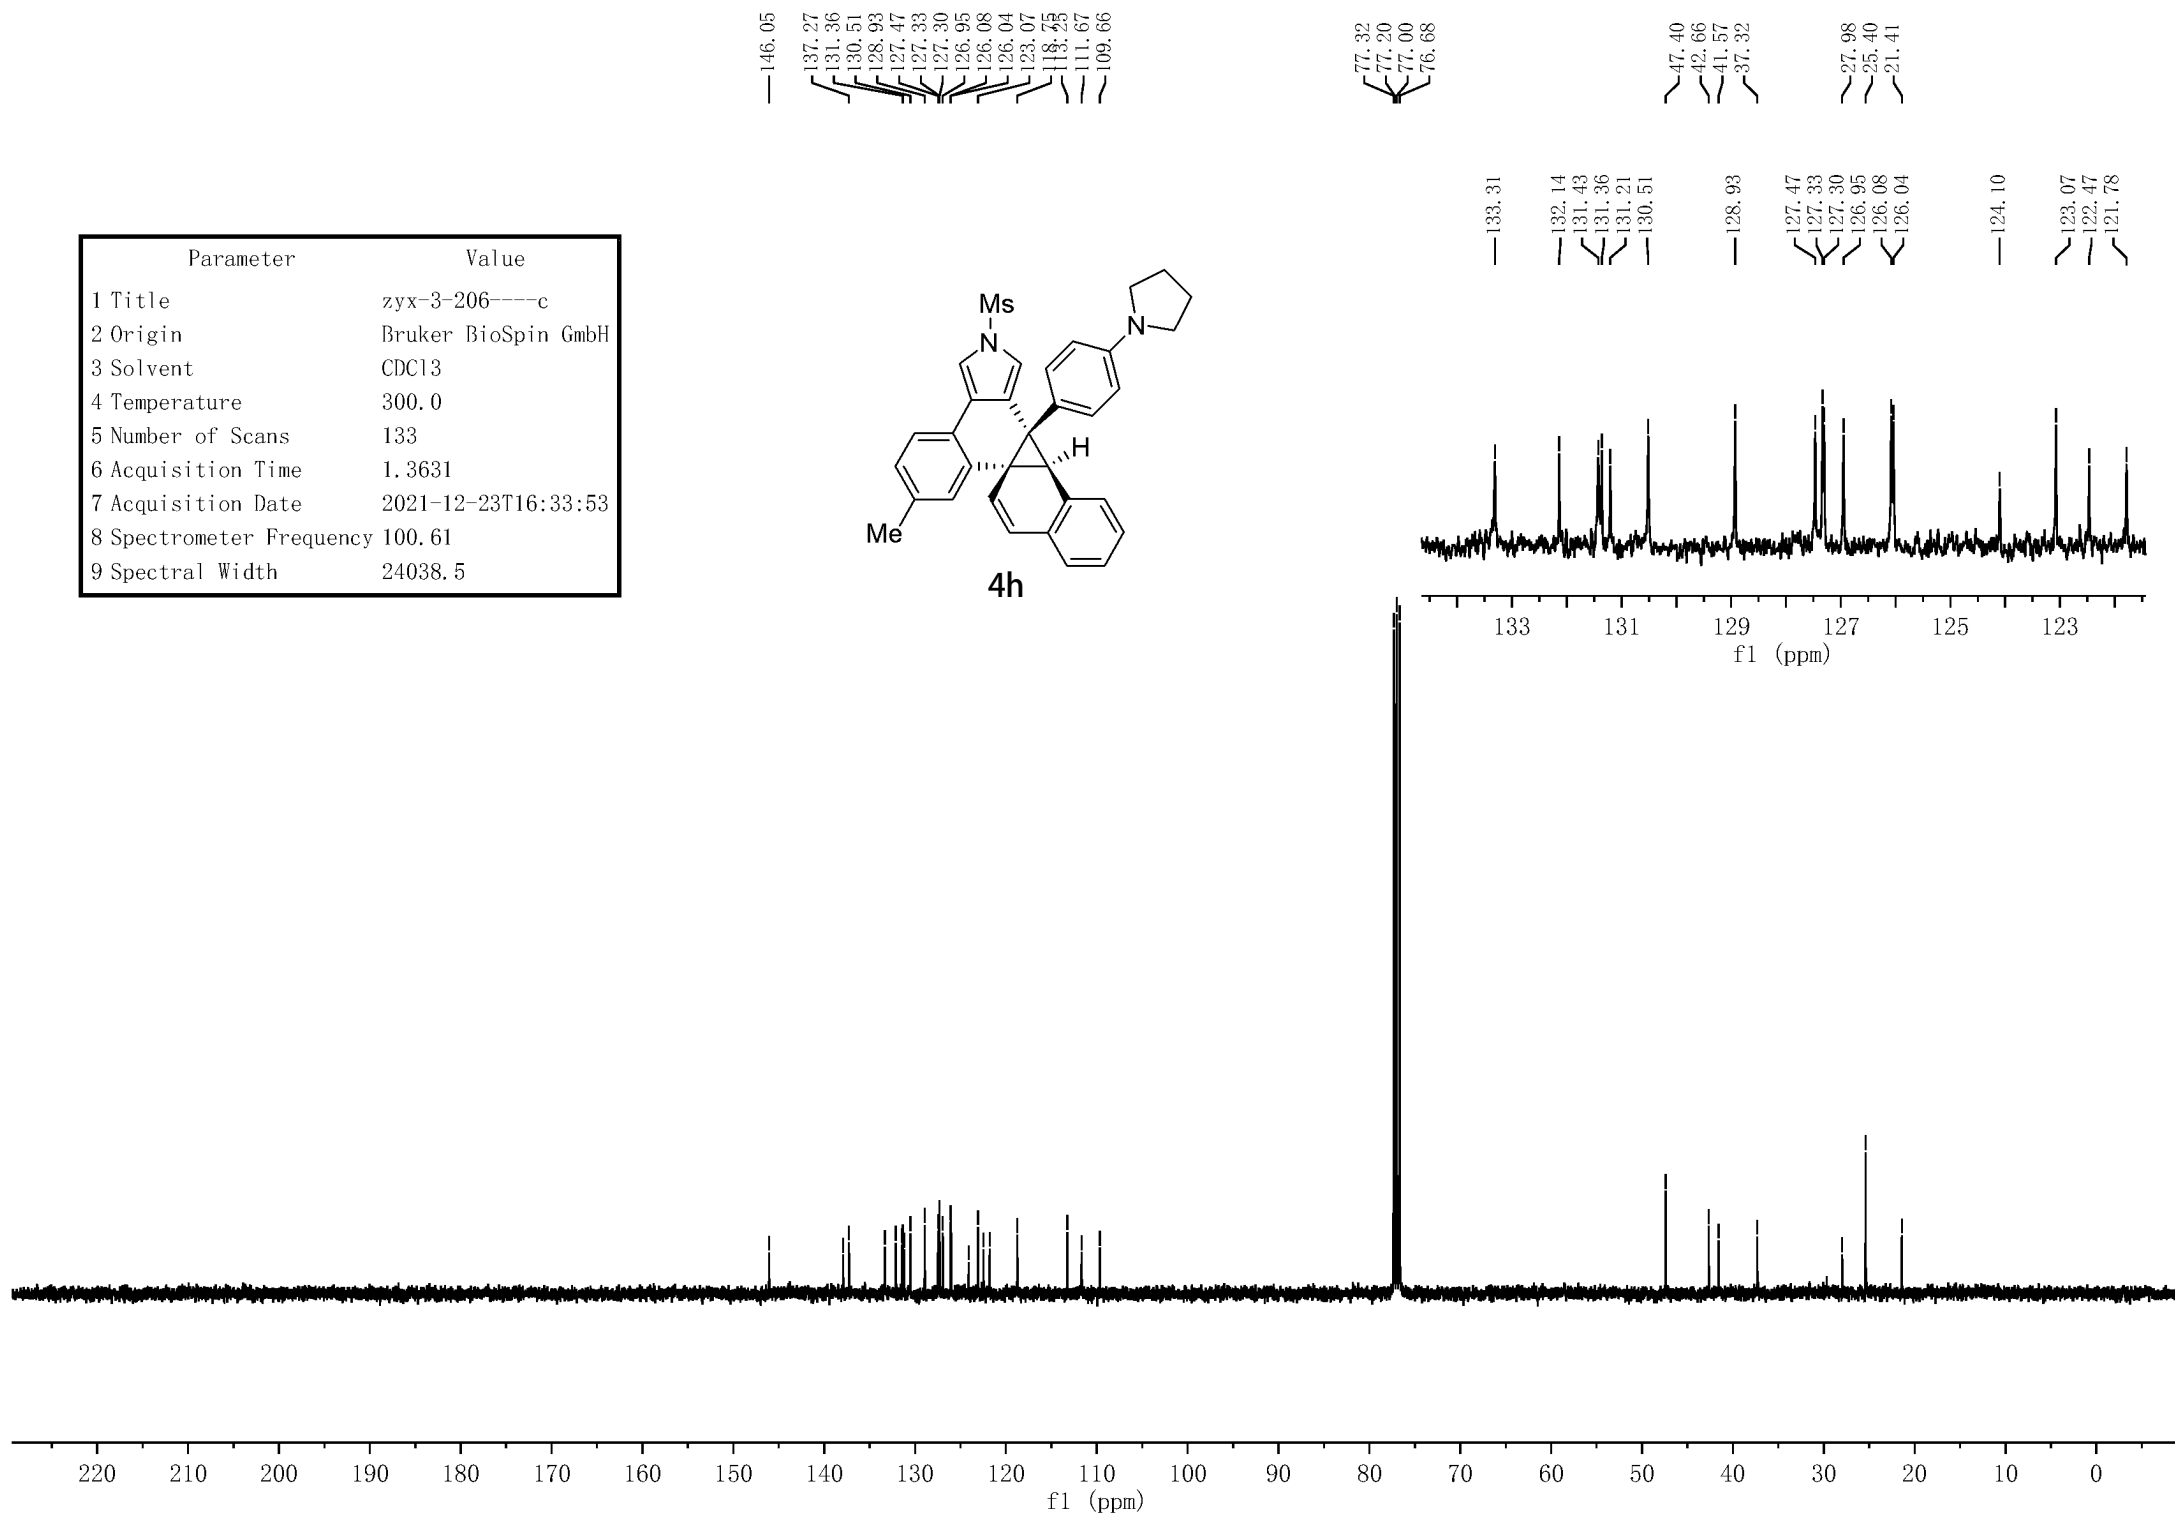

7.562  
7.541  
7.356  
7.351  
7.334  
7.234  
7.225  
7.200  
7.110  
7.093  
7.075  
6.919  
6.901  
6.880  
6.874  
6.837  
6.817  
6.789  
6.554  
6.549  
6.531  
6.379  
6.360  
6.335  
6.222  
6.197  
6.062  
6.057  
6.041  
6.036

3.805  
3.231  
3.154  
3.144  
3.107  
3.068  
2.636  
1.929  
1.913  
1.897  
0.000

| Parameter                | Value               |
|--------------------------|---------------------|
| 1 Title                  | ZYX-4-61-H          |
| 2 Origin                 | Bruker BioSpin GmbH |
| 3 Solvent                | CDCl3               |
| 4 Temperature            | 298.0               |
| 5 Number of Scans        | 13                  |
| 6 Acquisition Time       | 4.0894              |
| 7 Acquisition Date       | 2022-02-15T16:30:53 |
| 8 Spectrometer Frequency | 400.13              |
| 9 Spectral Width         | 8012.8              |

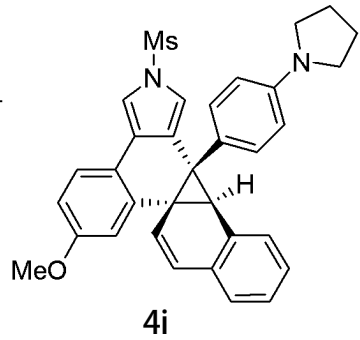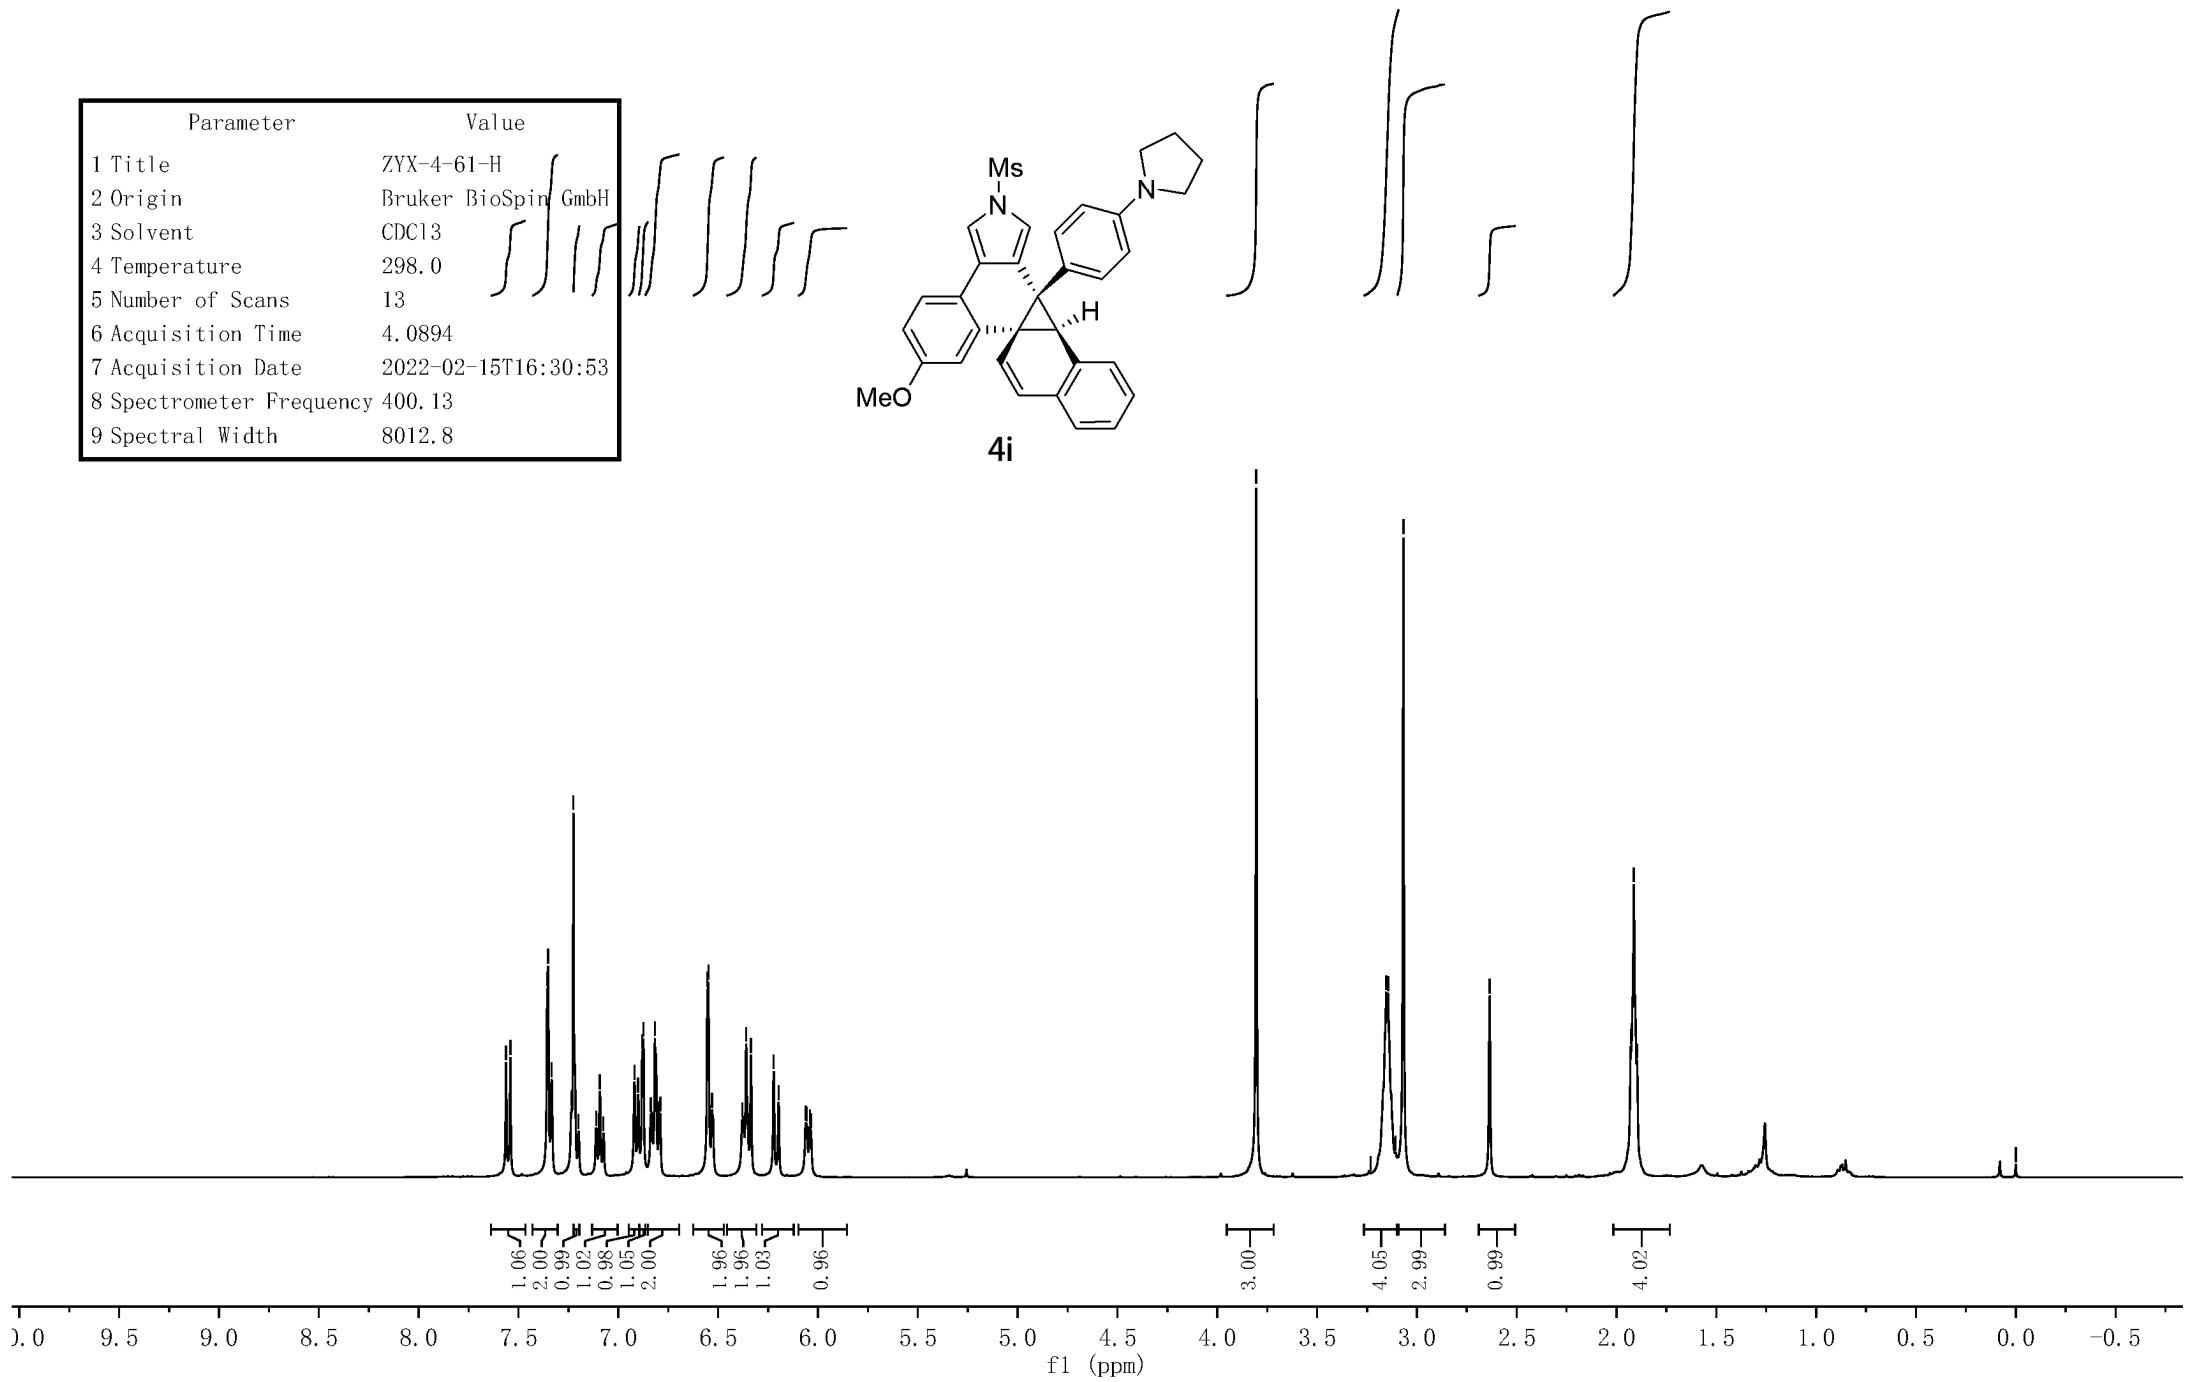

| Parameter                | Value               |
|--------------------------|---------------------|
| 1 Title                  | zyx-4-61-C          |
| 2 Origin                 | Bruker BioSpin GmbH |
| 3 Solvent                | CDCl3               |
| 4 Temperature            | 300.0               |
| 5 Number of Scans        | 71                  |
| 6 Acquisition Time       | 1.3631              |
| 7 Acquisition Date       | 2022-02-14T16:40:28 |
| 8 Spectrometer Frequency | 100.61              |
| 9 Spectral Width         | 24038.5             |

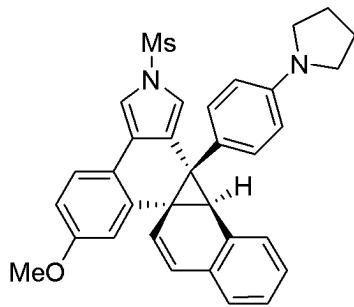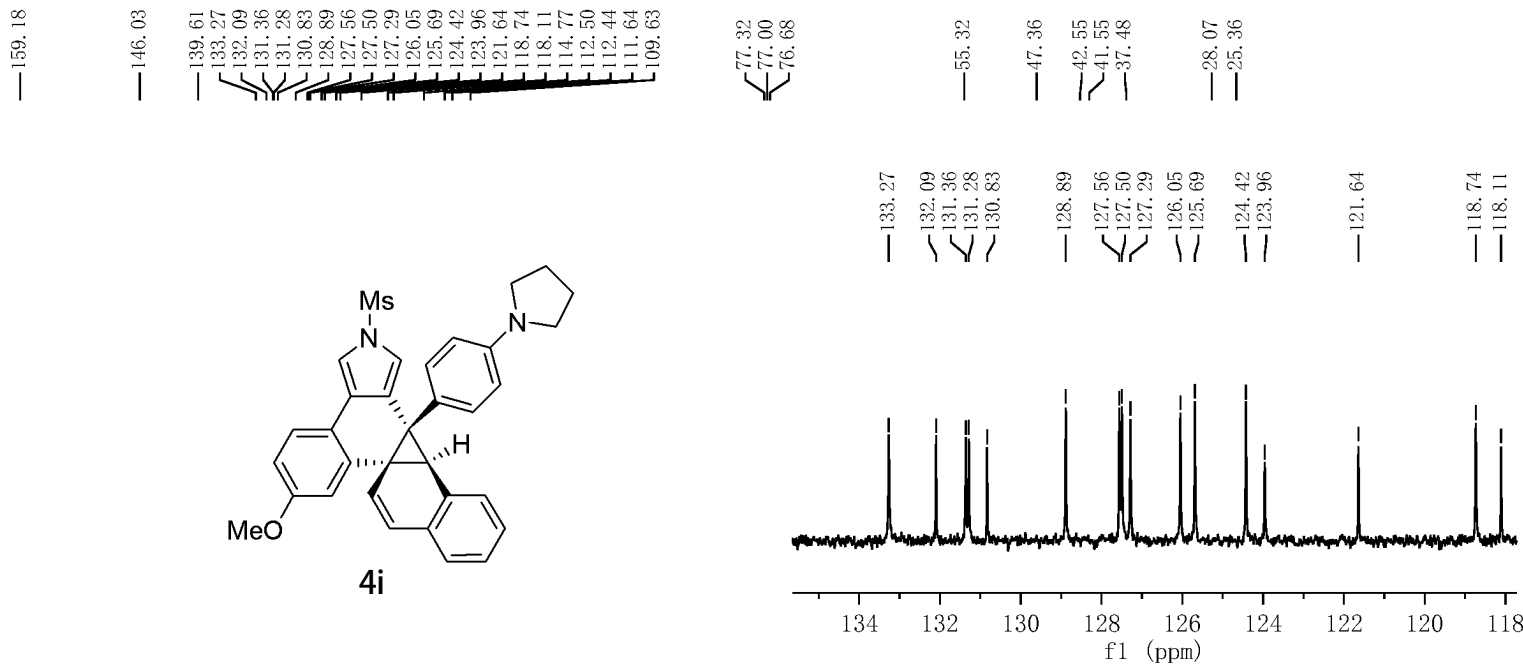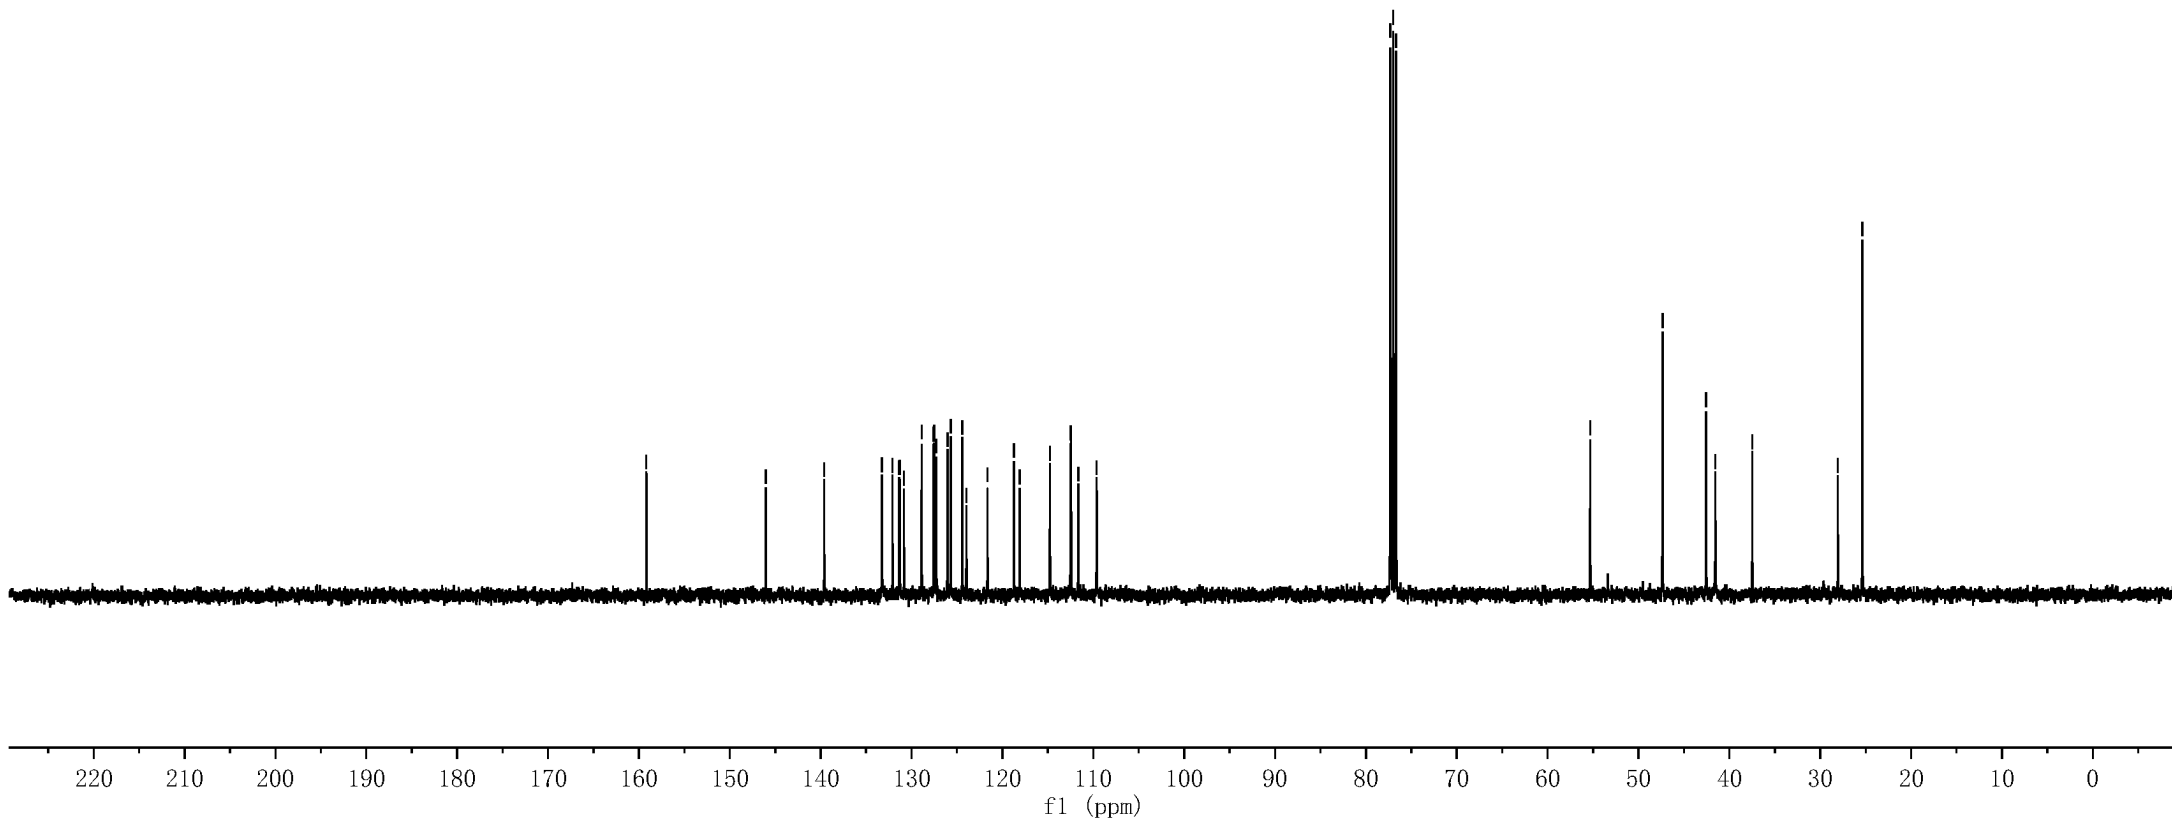

| Parameter                | Value               |
|--------------------------|---------------------|
| 1 Title                  | ZYX-13-4J           |
| 2 Origin                 | Bruker BioSpin GmbH |
| 3 Solvent                | CDCl3               |
| 4 Temperature            | 298.0               |
| 5 Number of Scans        | 6                   |
| 6 Acquisition Time       | 4.0894              |
| 7 Acquisition Date       | 2024-06-19T14:36:46 |
| 8 Spectrometer Frequency | 400.13              |
| 9 Spectral Width         | 8012.8              |

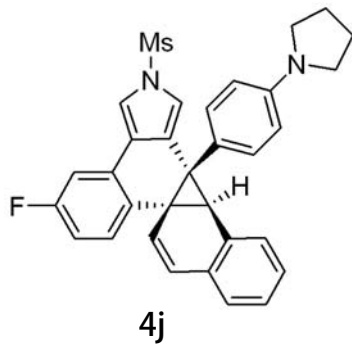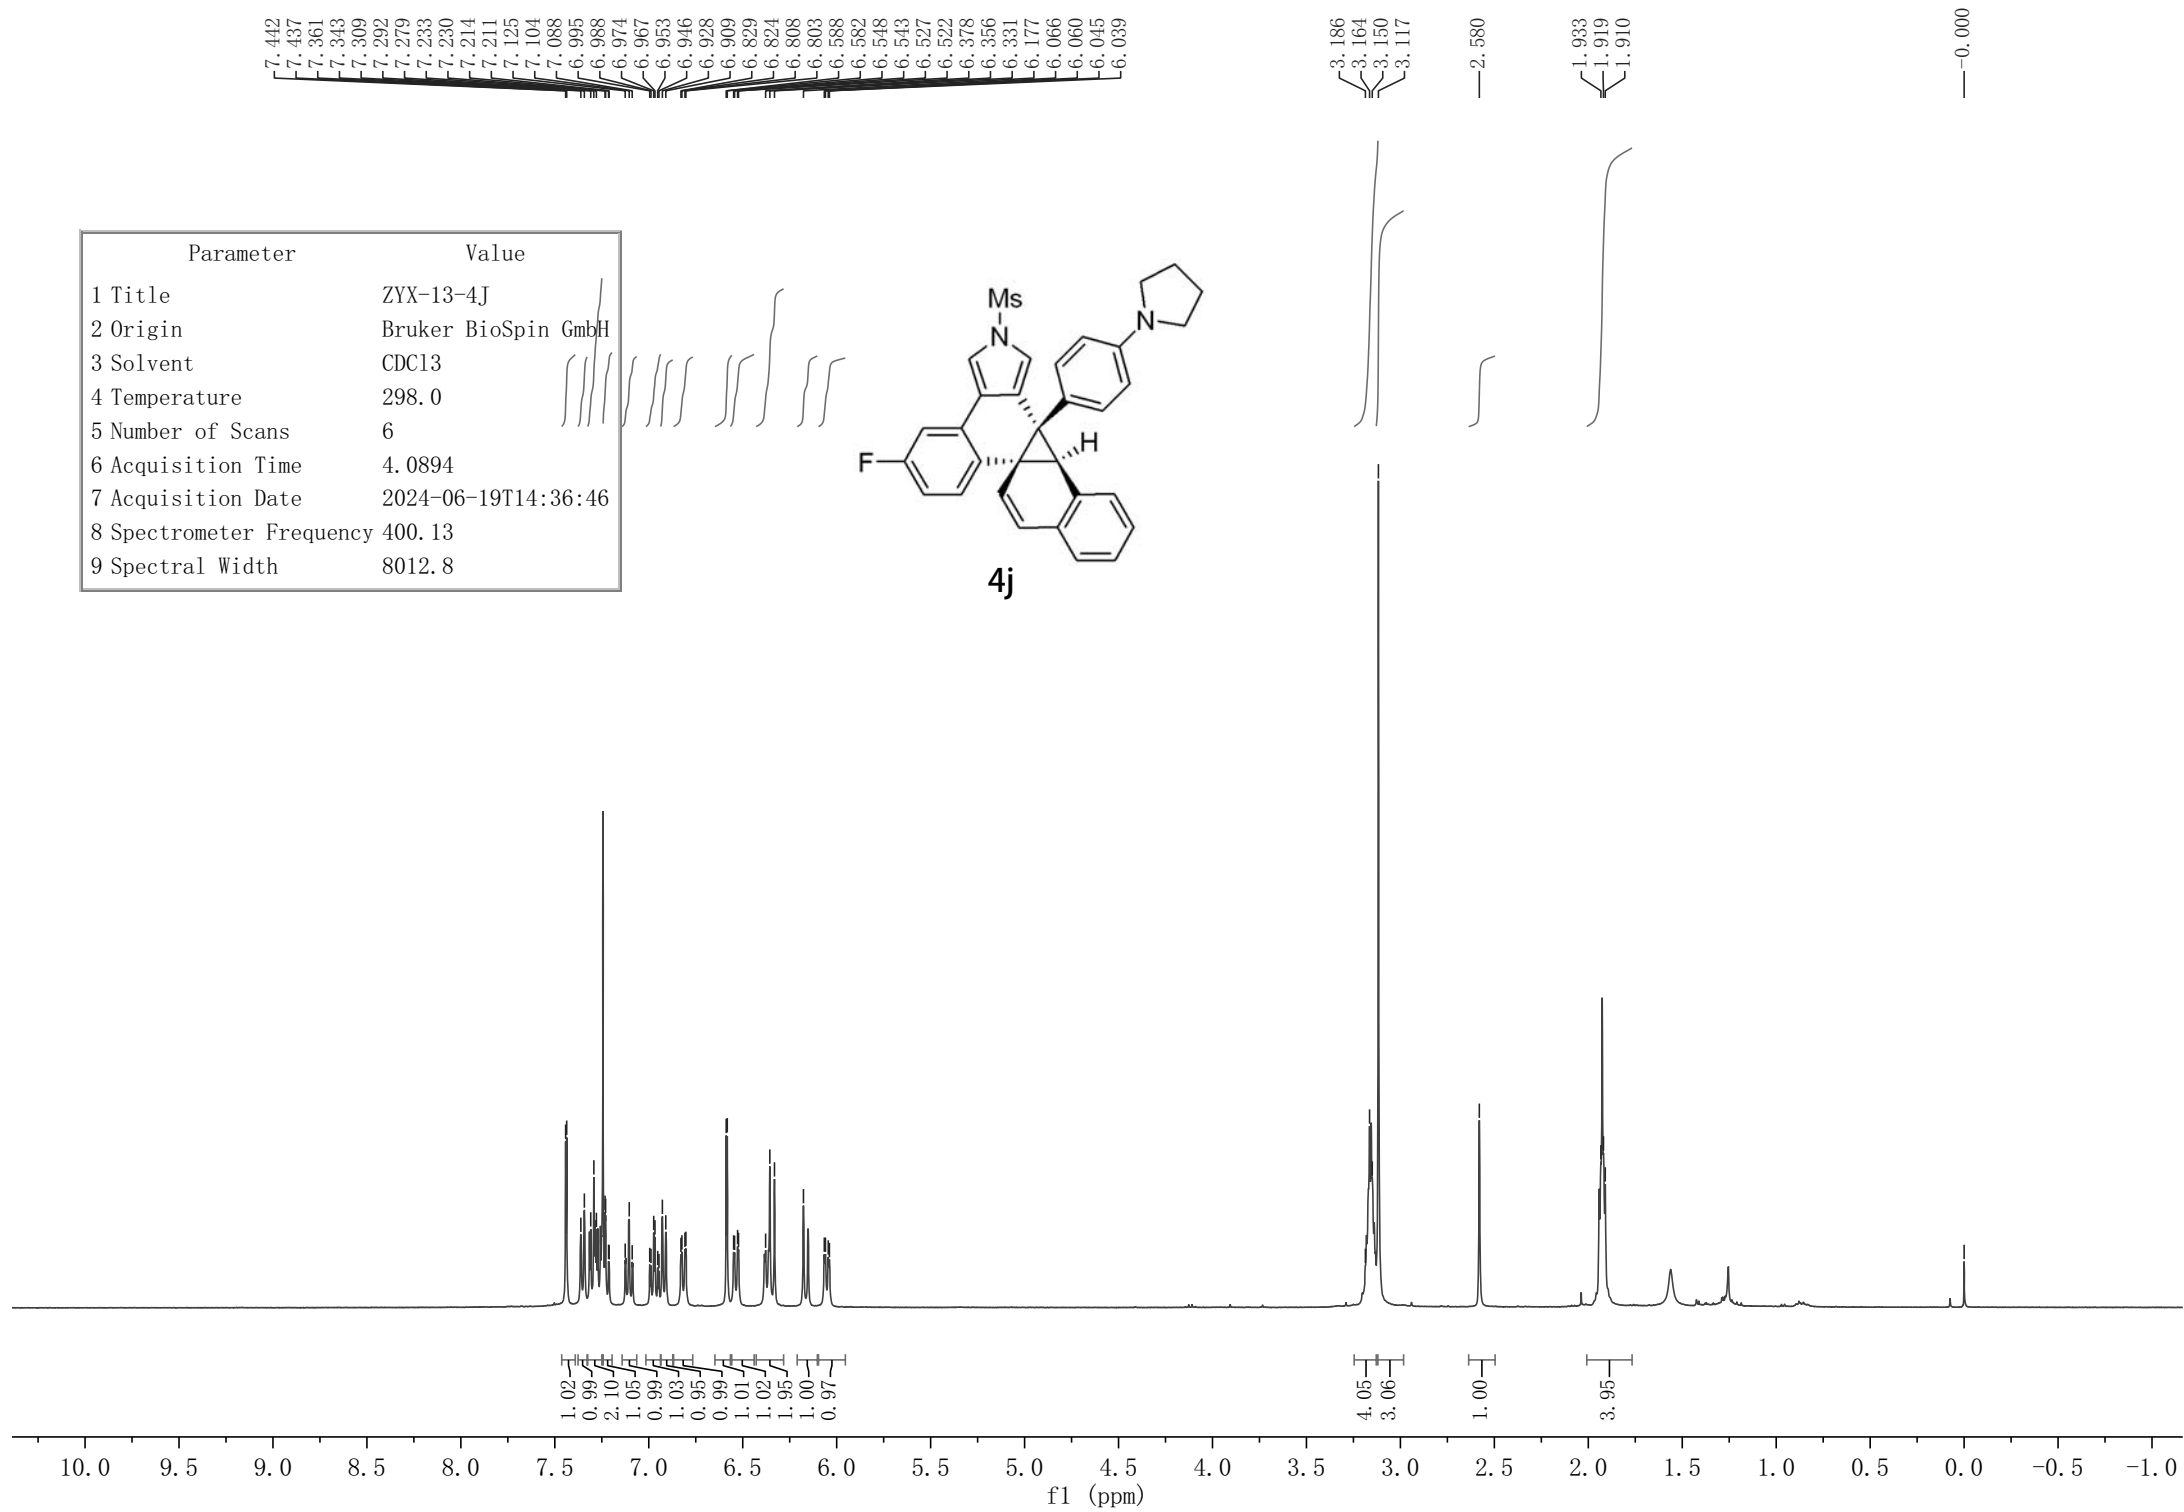



| Parameter                | Value               |
|--------------------------|---------------------|
| 1 Title                  | ZYX-4-20-cc         |
| 2 Origin                 | Bruker BioSpin GmbH |
| 3 Solvent                | CDCl3               |
| 4 Temperature            | 295.8               |
| 5 Number of Scans        | 78                  |
| 6 Acquisition Time       | 1.3631              |
| 7 Acquisition Date       | 2022-01-15T16:53:59 |
| 8 Spectrometer Frequency | 100.56              |
| 9 Spectral Width         | 24038.5             |

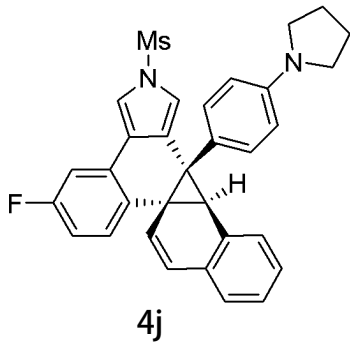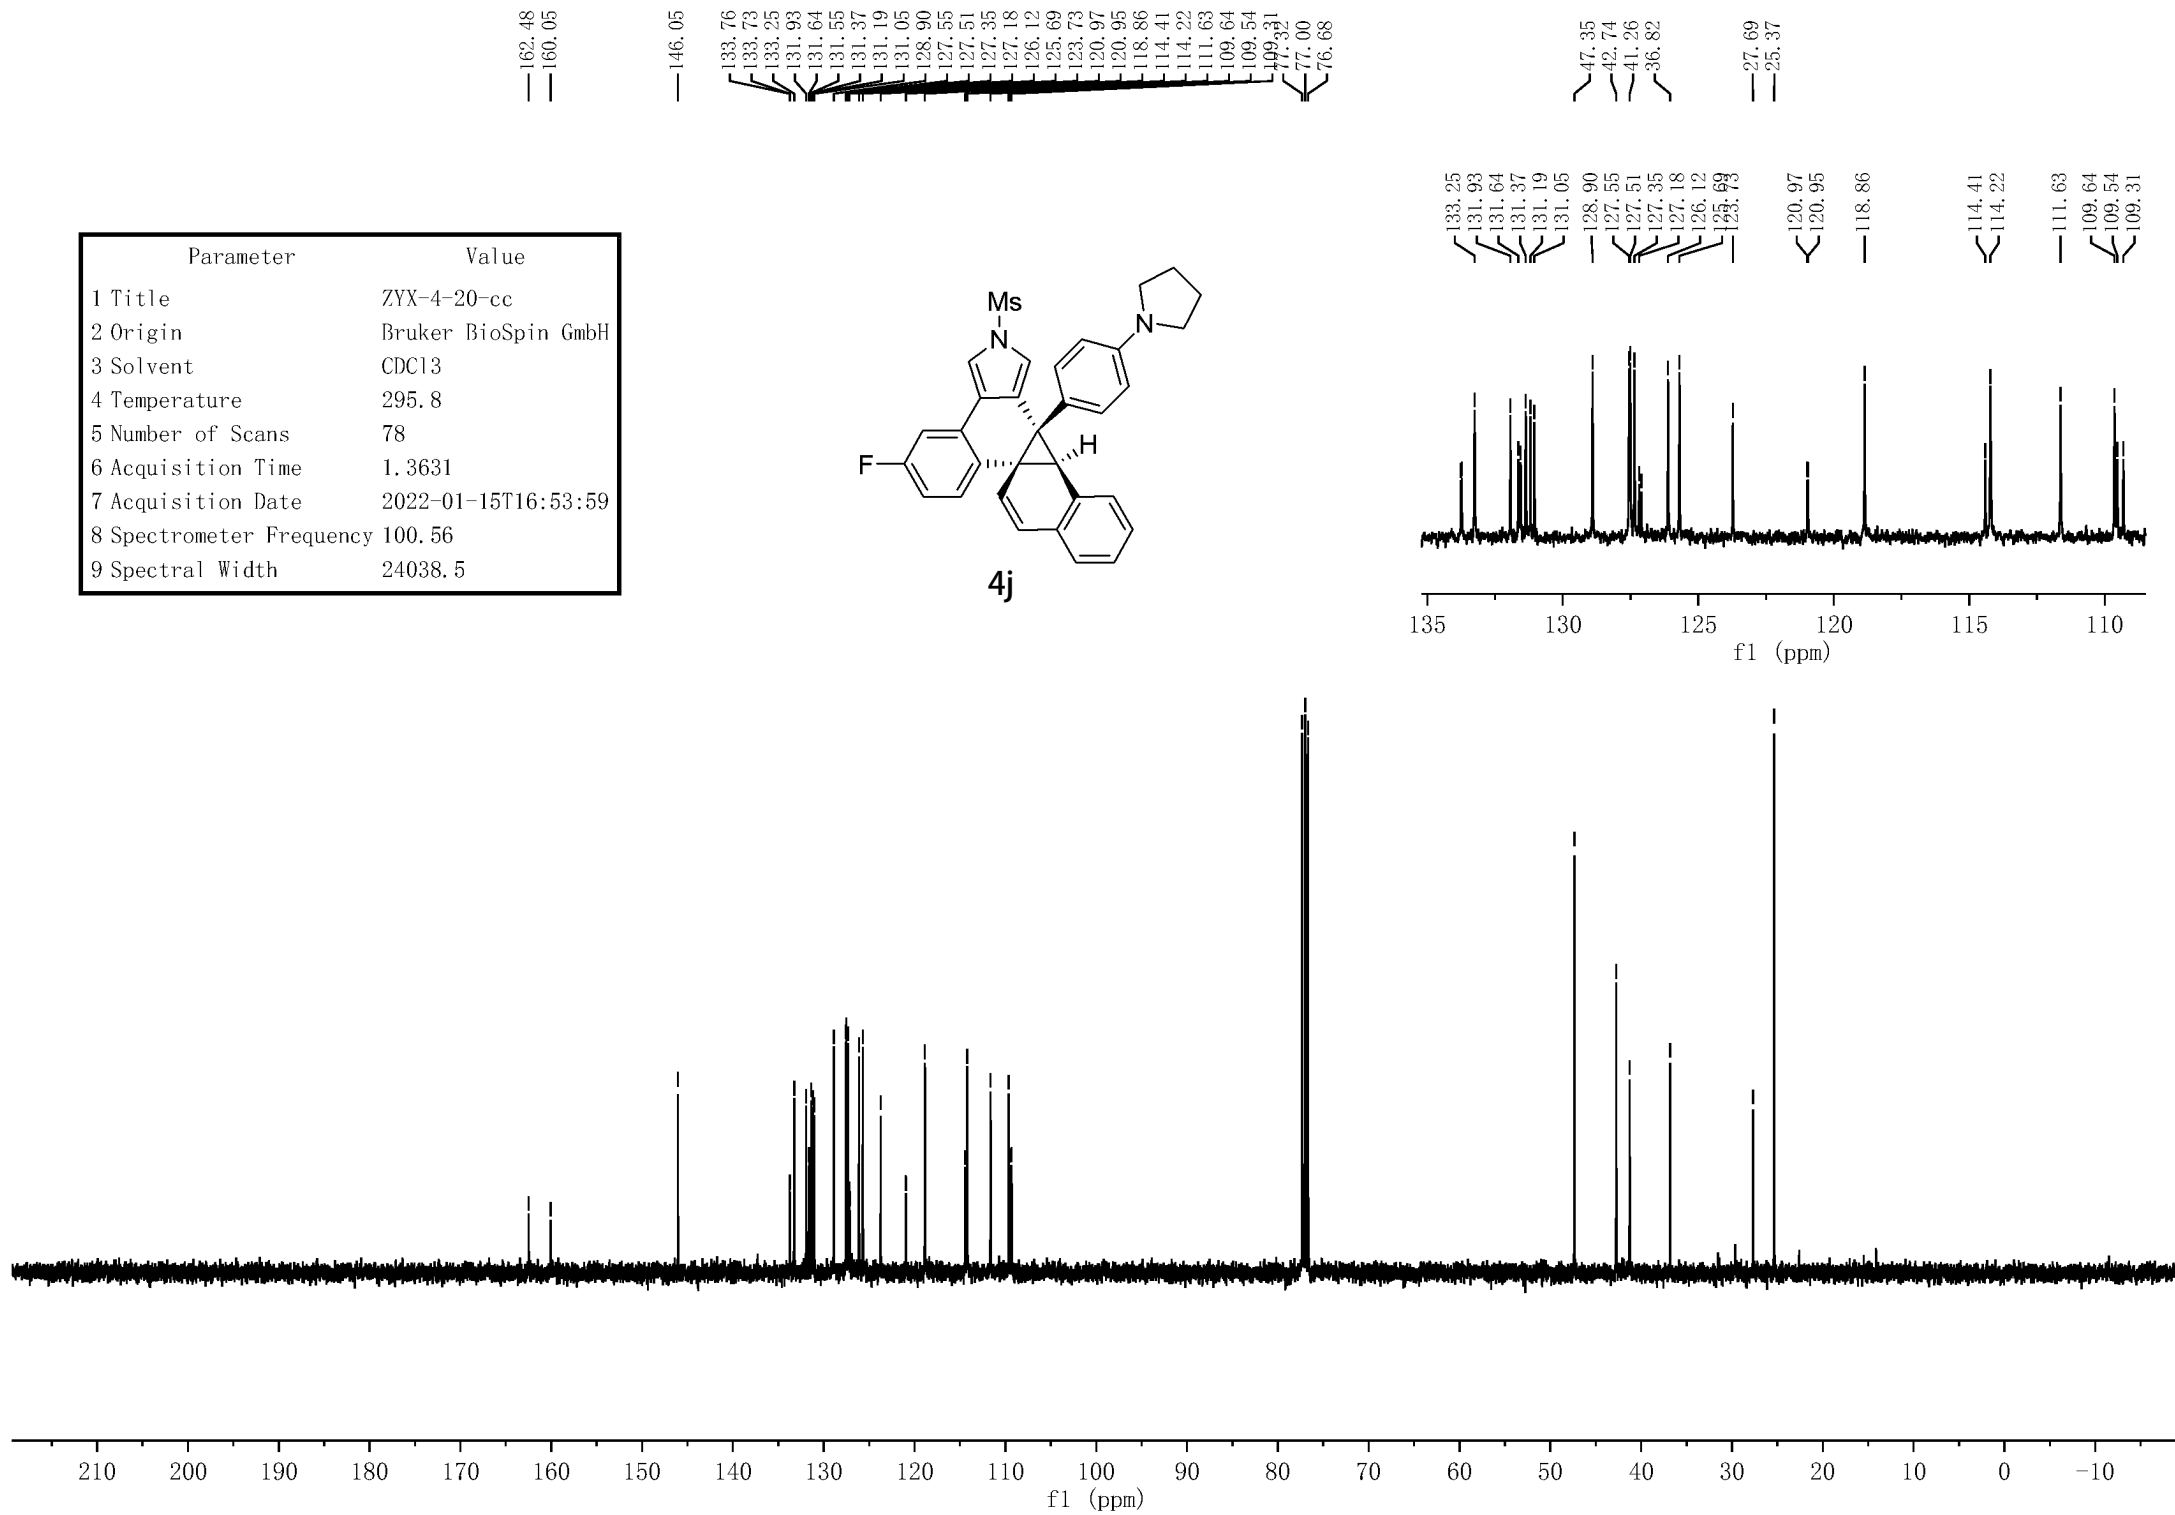

| Parameter                | Value               |
|--------------------------|---------------------|
| 1 Title                  | ZYX-4-20-FF         |
| 2 Origin                 | Bruker BioSpin GmbH |
| 3 Solvent                | CDCl3               |
| 4 Temperature            | 295.5               |
| 5 Number of Scans        | 10                  |
| 6 Acquisition Time       | 0.7340              |
| 7 Acquisition Date       | 2022-01-15T16:47:06 |
| 8 Spectrometer Frequency | 376.31              |
| 9 Spectral Width         | 89285.7             |

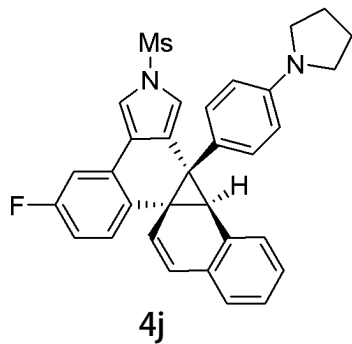

—116.64

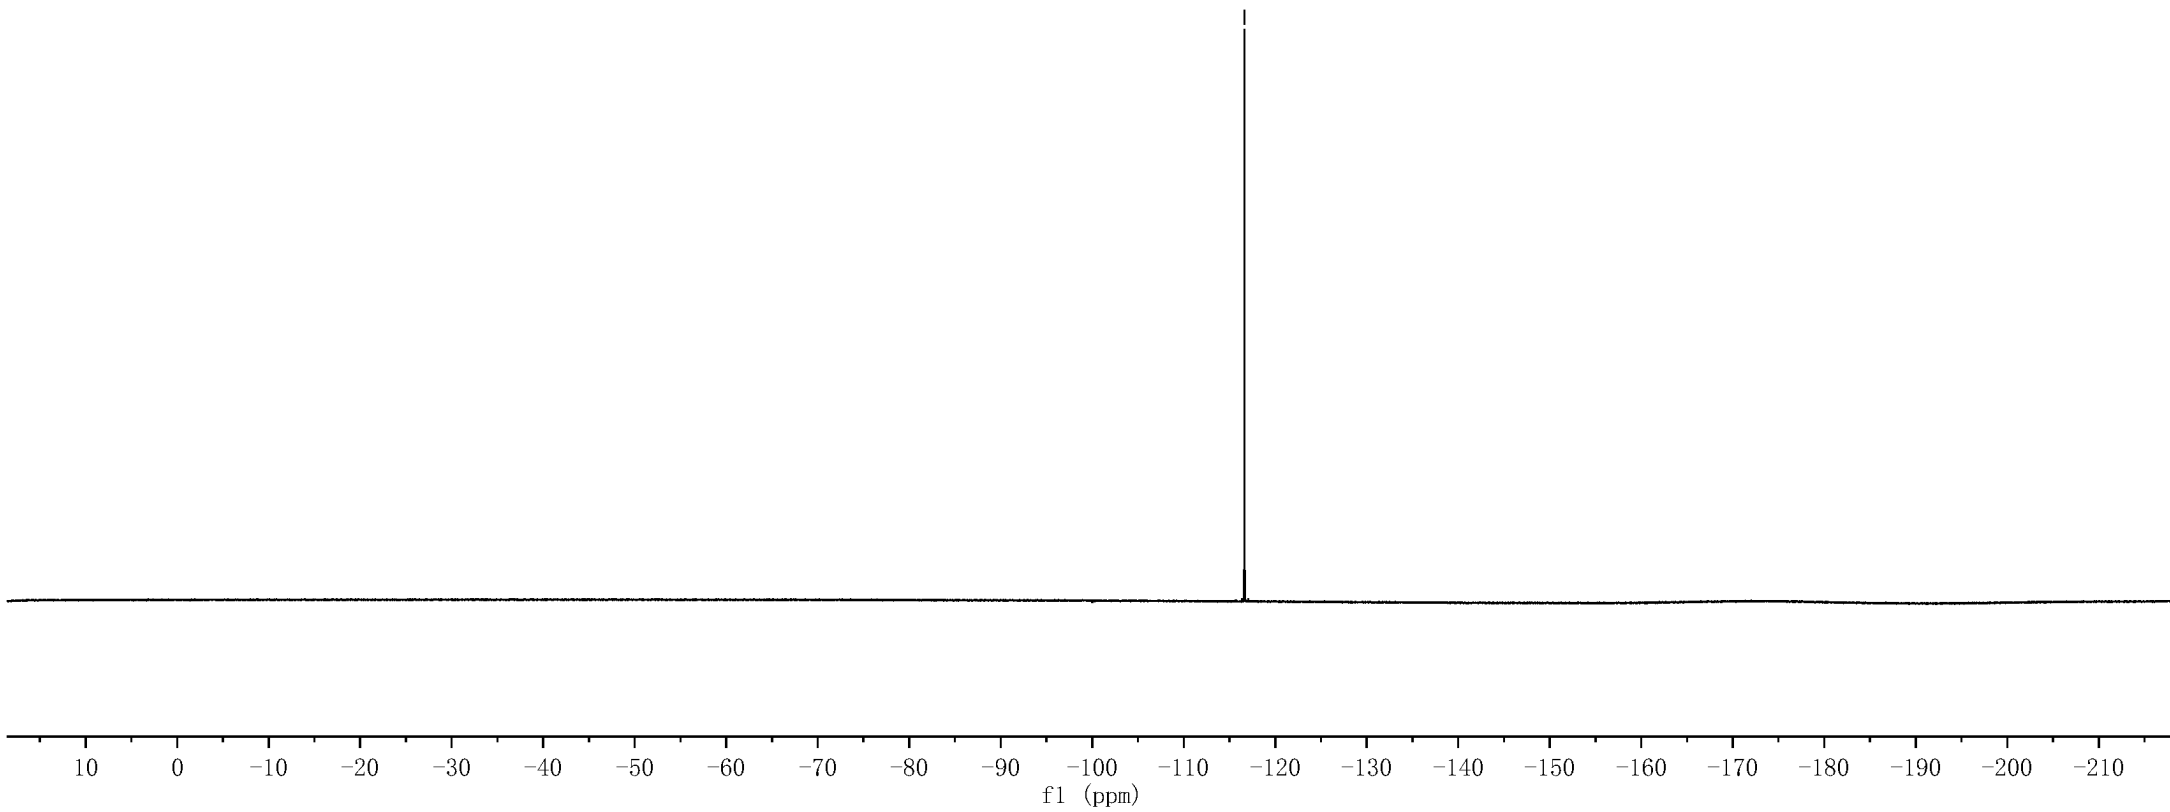

7.607  
7.603  
7.454  
7.448  
7.356  
7.338  
7.252  
7.228  
7.219  
7.206  
7.198  
7.120  
7.117  
7.101  
7.099  
7.083  
7.080  
6.916  
6.898  
6.812  
6.807  
6.791  
6.786  
6.584  
6.578  
6.545  
6.540  
6.524  
6.519  
6.374  
6.368  
6.348  
6.323  
6.153  
6.128  
6.059  
6.053  
6.037  
6.032

3.169  
3.153  
3.142  
3.126  
3.094  
2.586  
1.930  
1.914  
1.898

0.000

| Parameter                | Value               |
|--------------------------|---------------------|
| 1 Title                  | ZYX-4-9--H          |
| 2 Origin                 | Bruker BioSpin GmbH |
| 3 Solvent                | CDCl3               |
| 4 Temperature            | 295.2               |
| 5 Number of Scans        | 14                  |
| 6 Acquisition Time       | 3.9846              |
| 7 Acquisition Date       | 2022-01-19T16:19:13 |
| 8 Spectrometer Frequency | 399.93              |
| 9 Spectral Width         | 8223.7              |

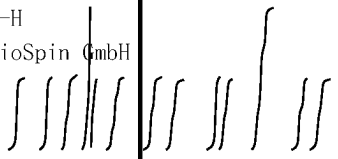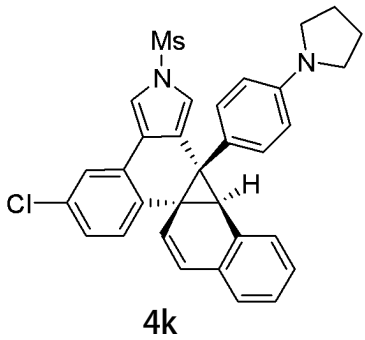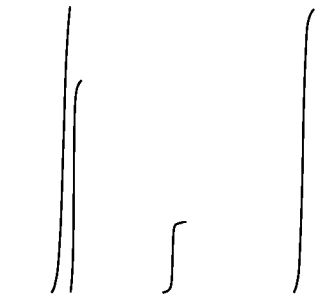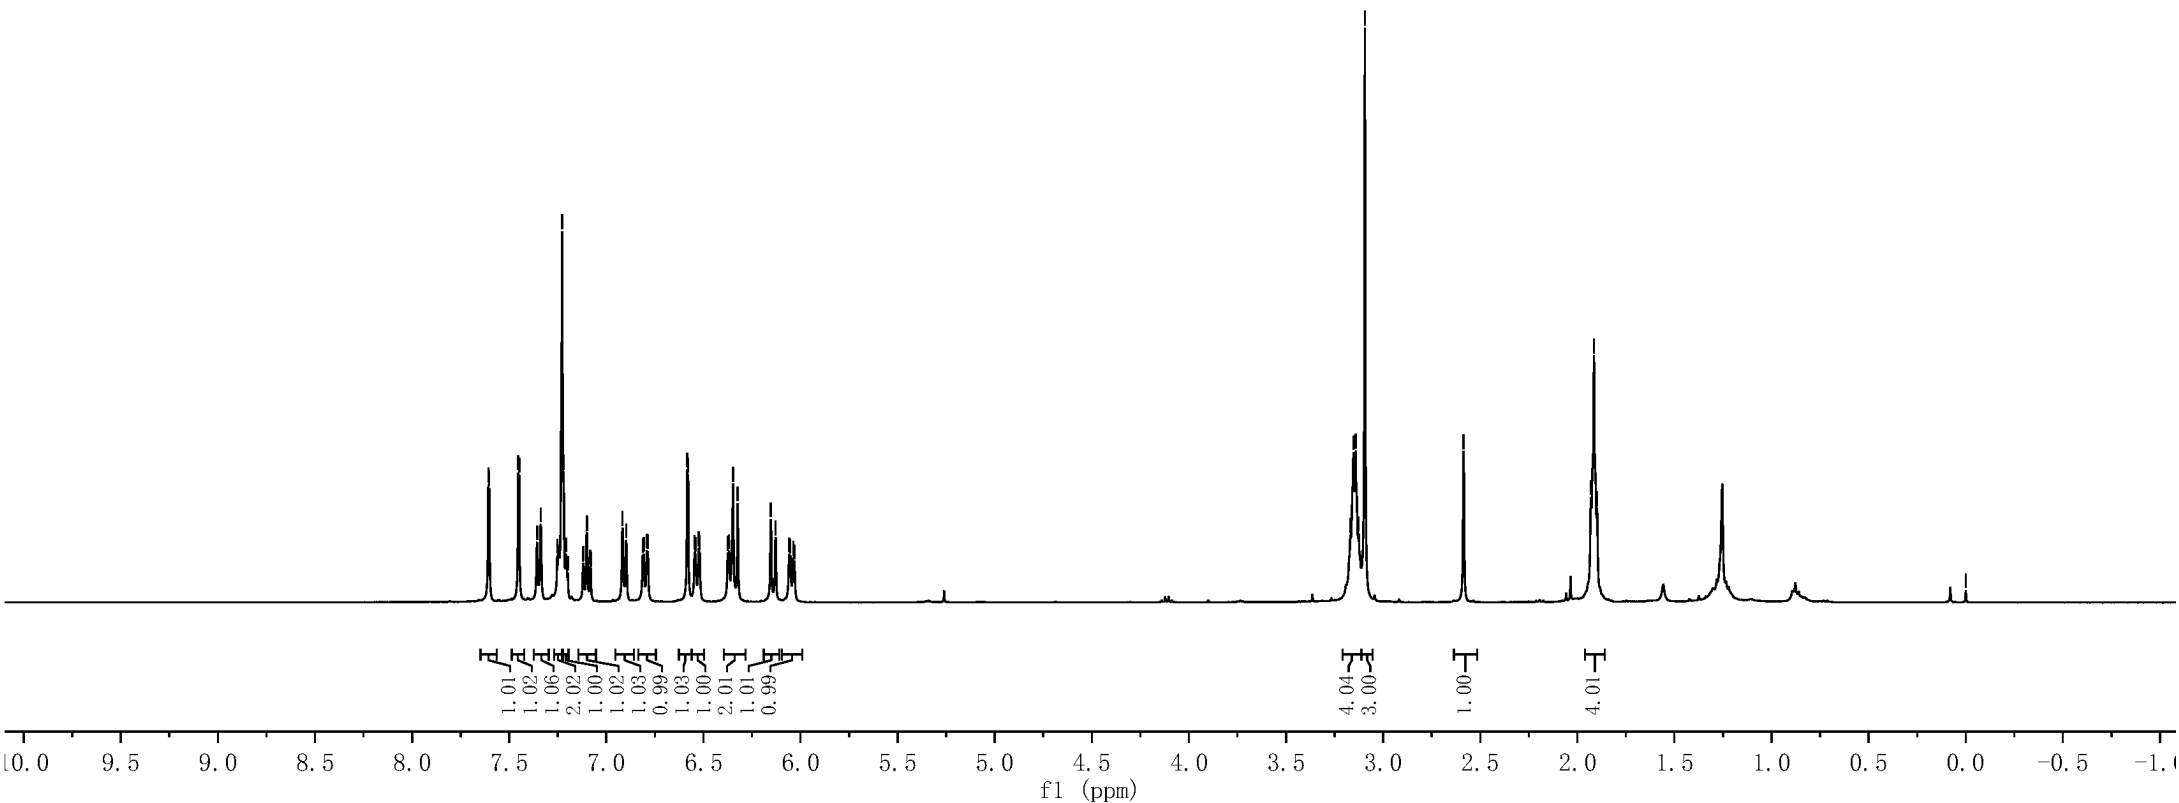

| Parameter                | Value               |
|--------------------------|---------------------|
| 1 Title                  | zyx-4-9---C         |
| 2 Origin                 | Bruker BioSpin GmbH |
| 3 Solvent                | CDCl3               |
| 4 Temperature            | 295.5               |
| 5 Number of Scans        | 84                  |
| 6 Acquisition Time       | 1.3631              |
| 7 Acquisition Date       | 2022-01-20T16:39:23 |
| 8 Spectrometer Frequency | 100.56              |
| 9 Spectral Width         | 24038.5             |

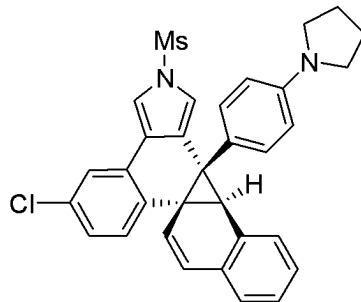

4k

146.09  
136.30  
133.24  
132.00  
131.83  
131.36  
131.19  
130.99  
128.92  
127.66  
127.61  
127.40  
127.22  
127.05  
126.19  
125.38  
123.62  
122.92  
120.56  
118.86  
114.18  
111.64  
109.66

77.32  
77.00  
76.68

47.37  
42.79  
41.39  
36.89

27.90  
25.38

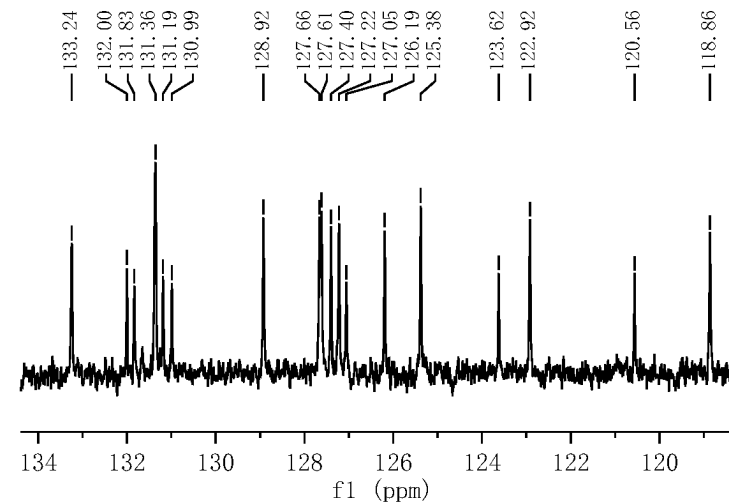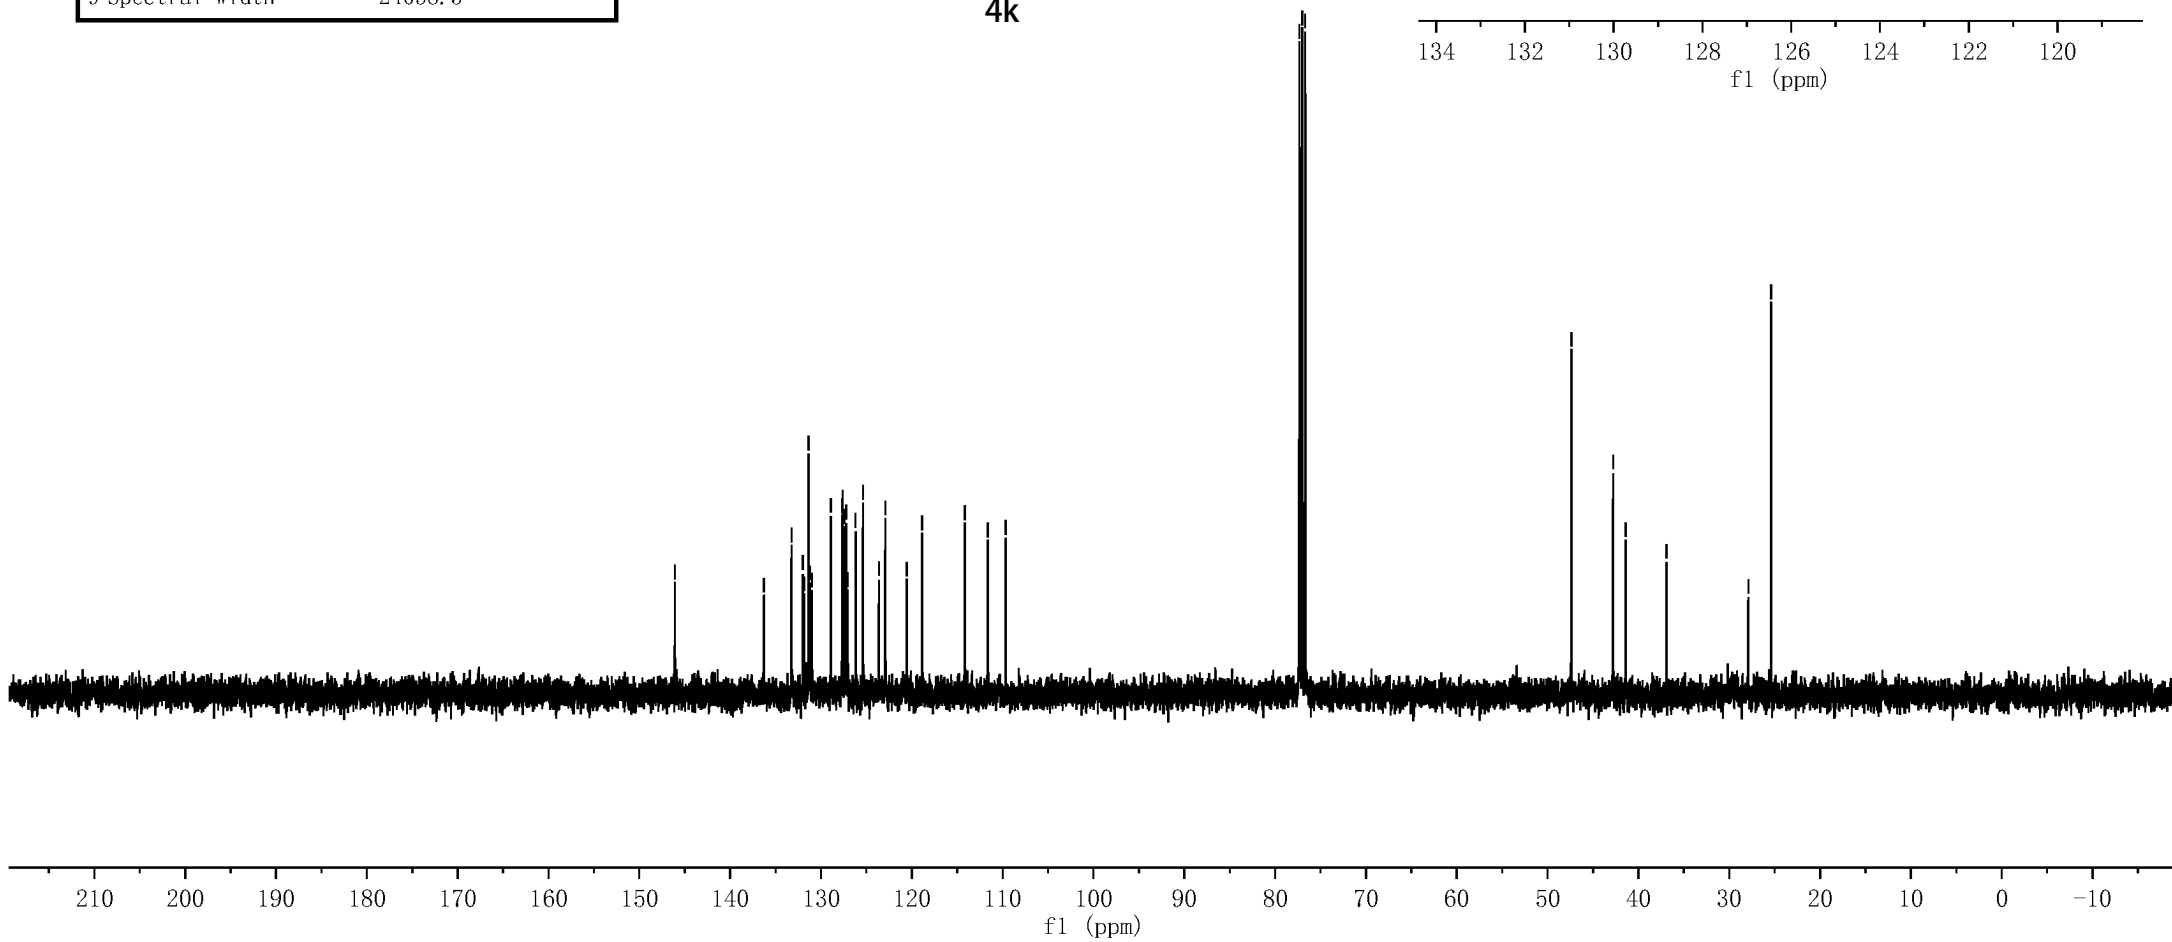

| Parameter                | Value               |
|--------------------------|---------------------|
| 1 Title                  | zyx-4-74-h-major    |
| 2 Origin                 | Bruker BioSpin GmbH |
| 3 Solvent                | CDCl3               |
| 4 Temperature            | 298.0               |
| 5 Number of Scans        | 14                  |
| 6 Acquisition Time       | 4.0894              |
| 7 Acquisition Date       | 2022-02-19T09:08:45 |
| 8 Spectrometer Frequency | 400.13              |
| 9 Spectral Width         | 8012.8              |

7.468  
7.451  
7.445  
7.350  
7.331  
7.228  
7.208  
7.194  
7.108  
7.089  
7.071  
6.915  
6.896  
6.829  
6.824  
6.808  
6.803  
6.566  
6.561  
6.550  
6.545  
6.529  
6.524  
6.378  
6.356  
6.342  
6.317  
6.216  
6.192  
6.061  
6.055  
6.040  
6.035

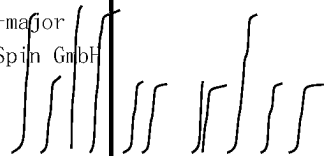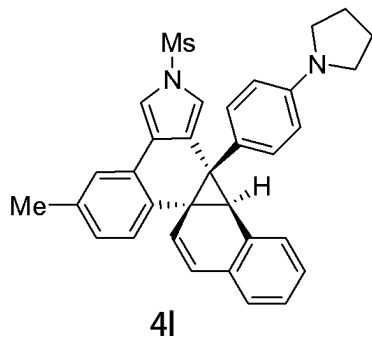

3.173  
3.157  
3.148  
3.132  
3.078  
-2.587  
-2.371  
1.933  
1.917  
1.901

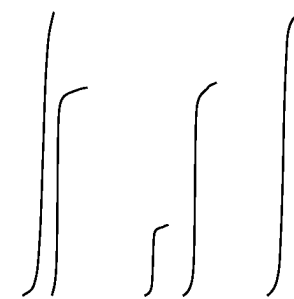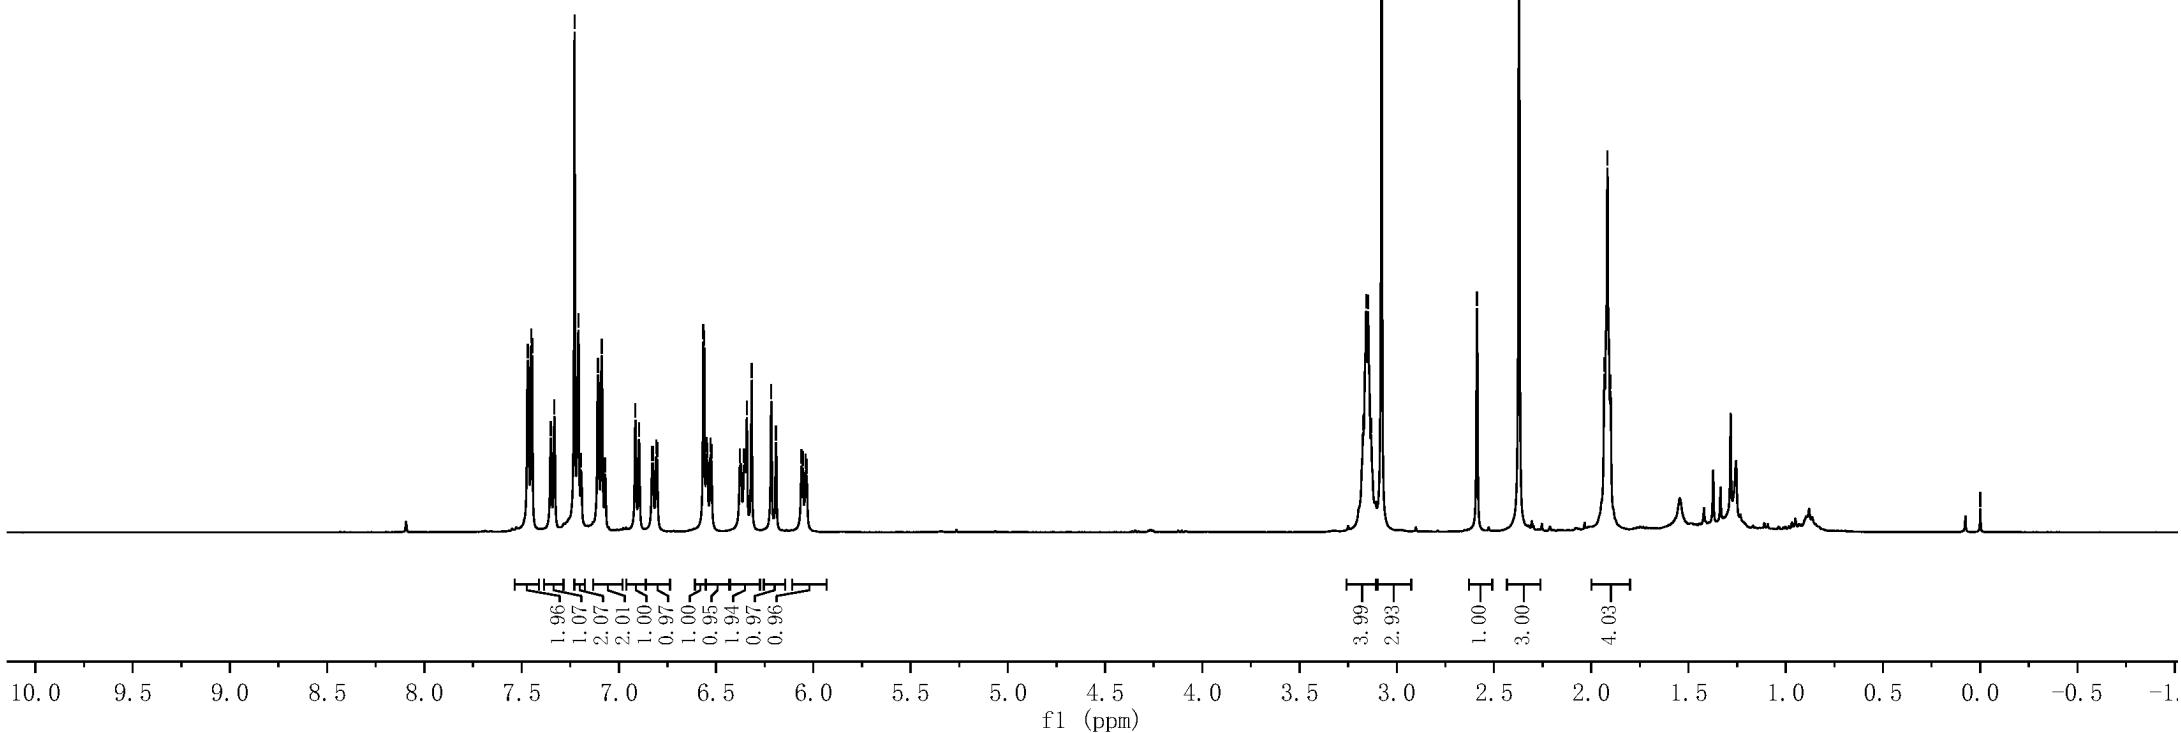

-0.000

| Parameter                | Value               |
|--------------------------|---------------------|
| 1 Title                  | zyx-4-74-c-major    |
| 2 Origin                 | Bruker BioSpin GmbH |
| 3 Solvent                | CDC13               |
| 4 Temperature            | 300.0               |
| 5 Number of Scans        | 65                  |
| 6 Acquisition Time       | 1.3631              |
| 7 Acquisition Date       | 2022-02-19T09:10:36 |
| 8 Spectrometer Frequency | 100.61              |
| 9 Spectral Width         | 24038.5             |

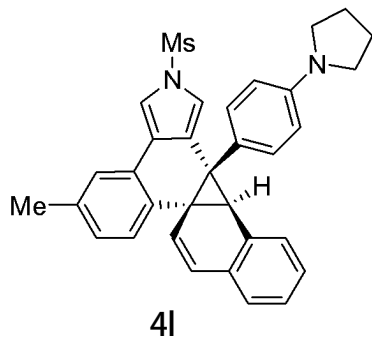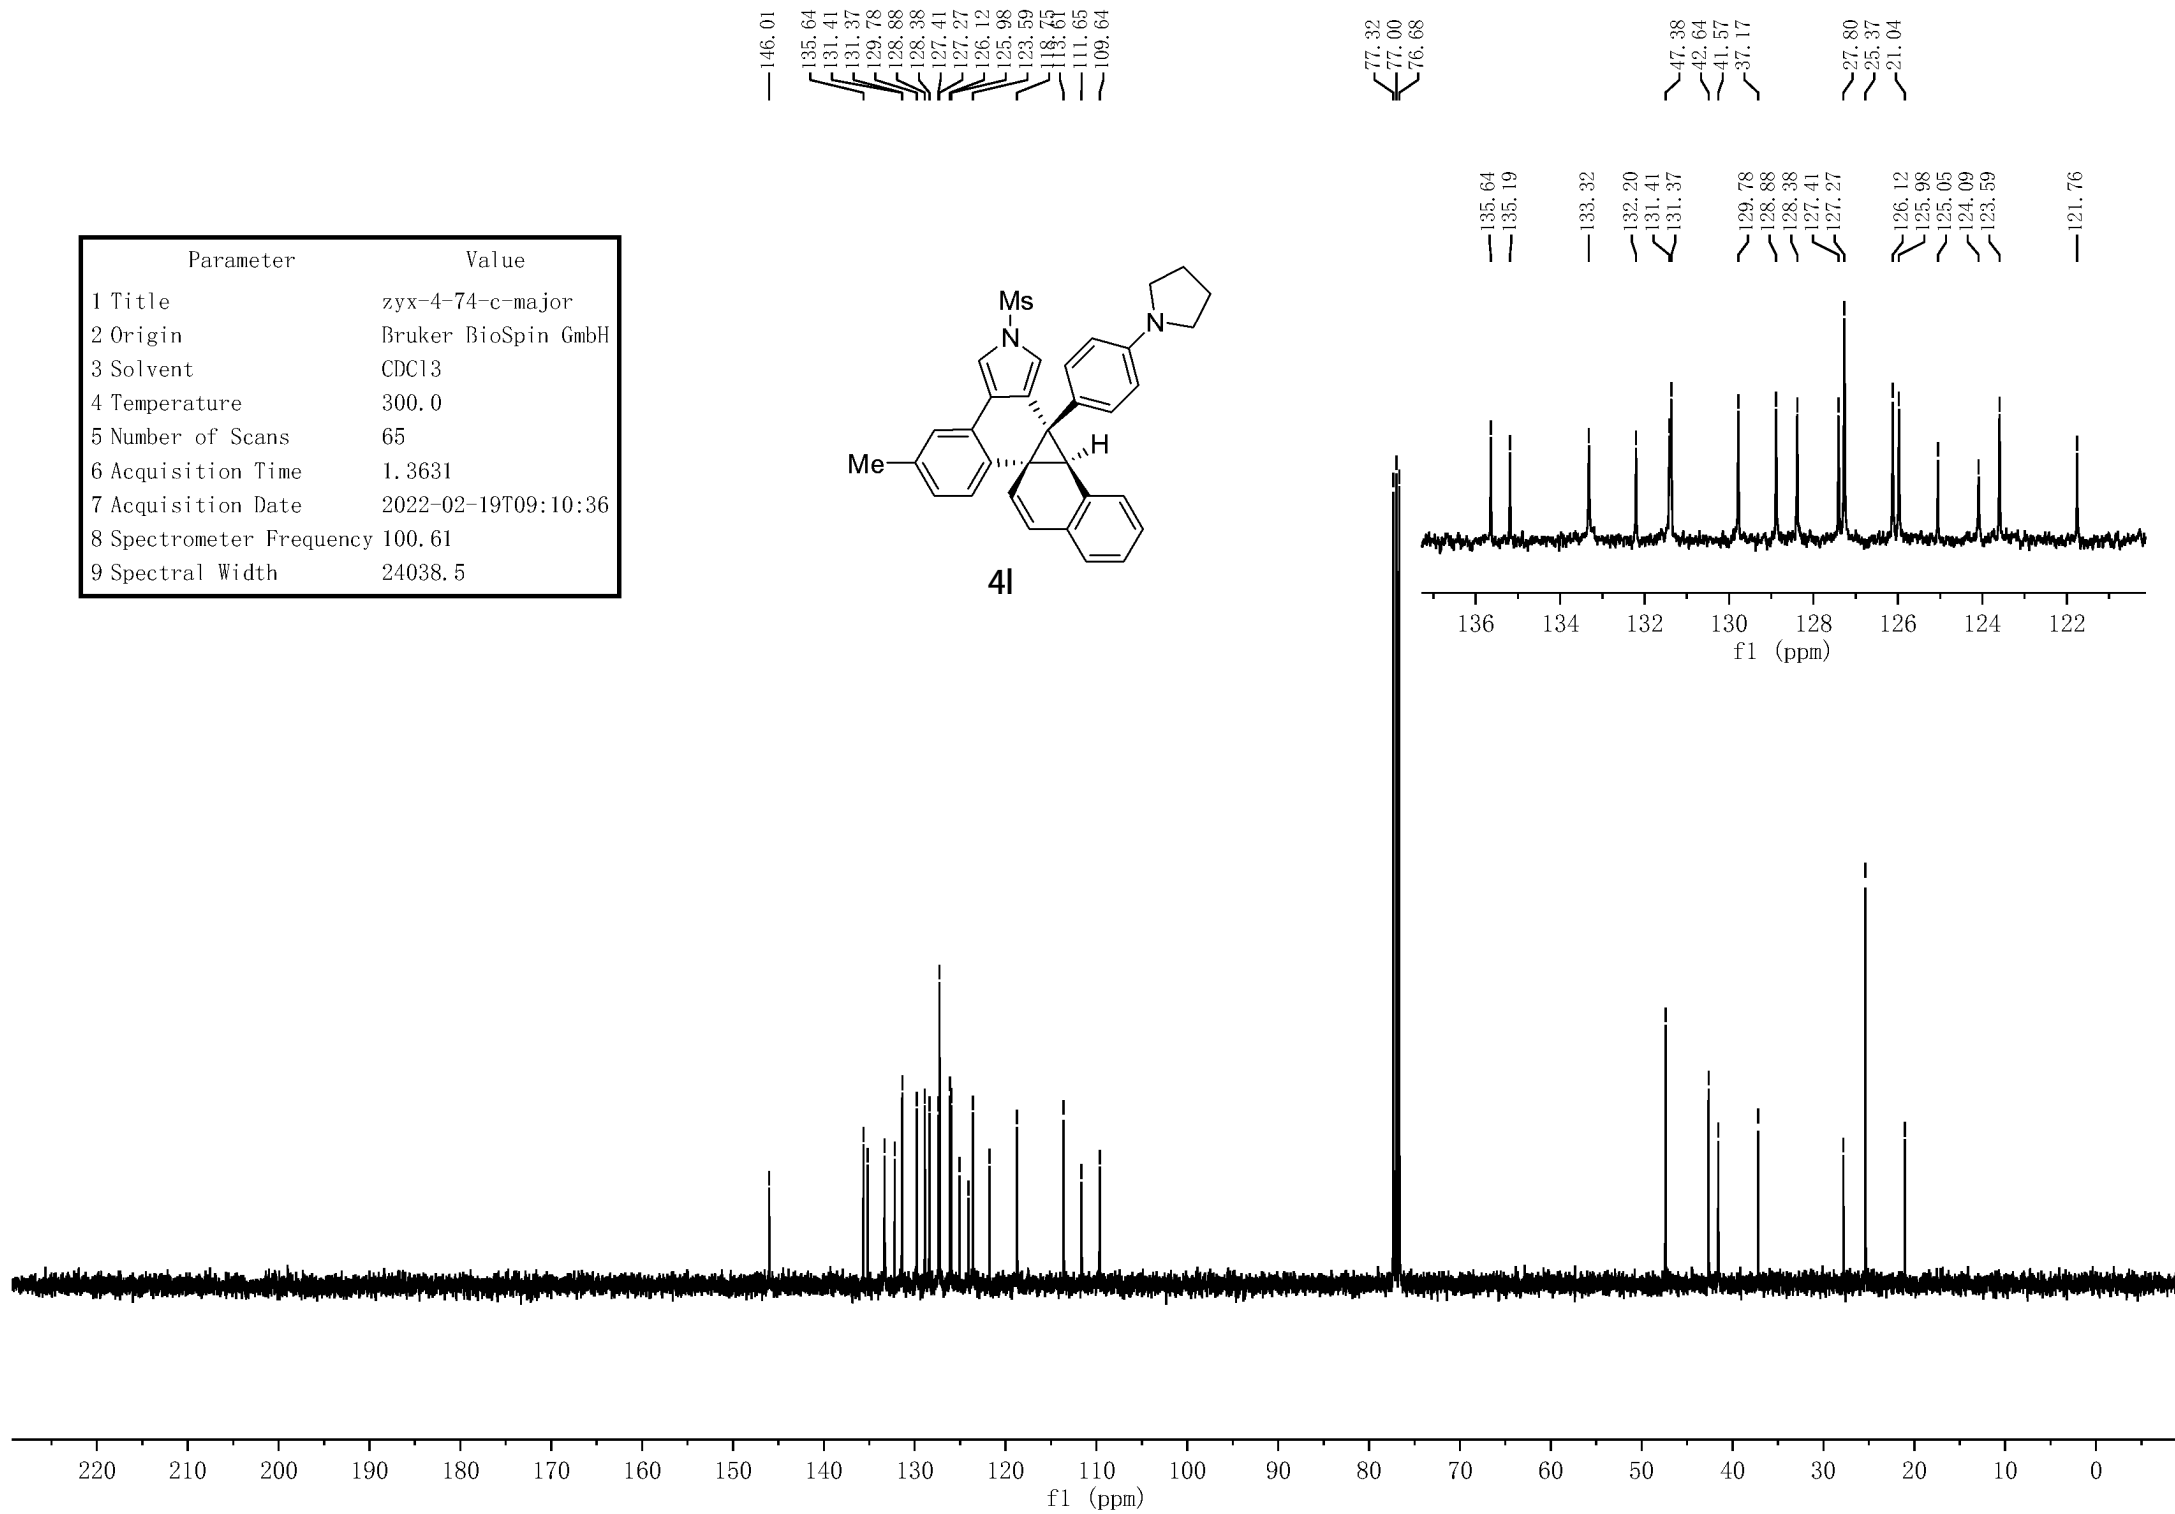

| Parameter                | Value               |
|--------------------------|---------------------|
| 1 Title                  | zyx-3-243-h         |
| 2 Origin                 | Bruker BioSpin GmbH |
| 3 Solvent                | CDCl3               |
| 4 Temperature            | 295.5               |
| 5 Number of Scans        | 16                  |
| 6 Acquisition Time       | 3.9846              |
| 7 Acquisition Date       | 2022-01-08T15:47:38 |
| 8 Spectrometer Frequency | 399.93              |
| 9 Spectral Width         | 8223.7              |

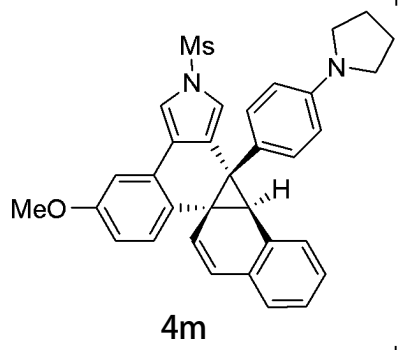

7.455  
7.450  
7.352  
7.333  
7.243  
7.221  
7.216  
7.197  
7.157  
7.150  
7.109  
7.088  
7.069  
6.916  
6.865  
6.843  
6.806  
6.578  
6.572  
6.551  
6.546  
6.530  
6.525  
6.378  
6.351  
6.340  
6.316  
6.204  
6.179  
6.061  
6.055  
6.040  
6.034

3.843  
3.173  
3.158  
3.148  
3.132  
3.095  
2.568  
1.933  
1.917  
1.901  
0.000

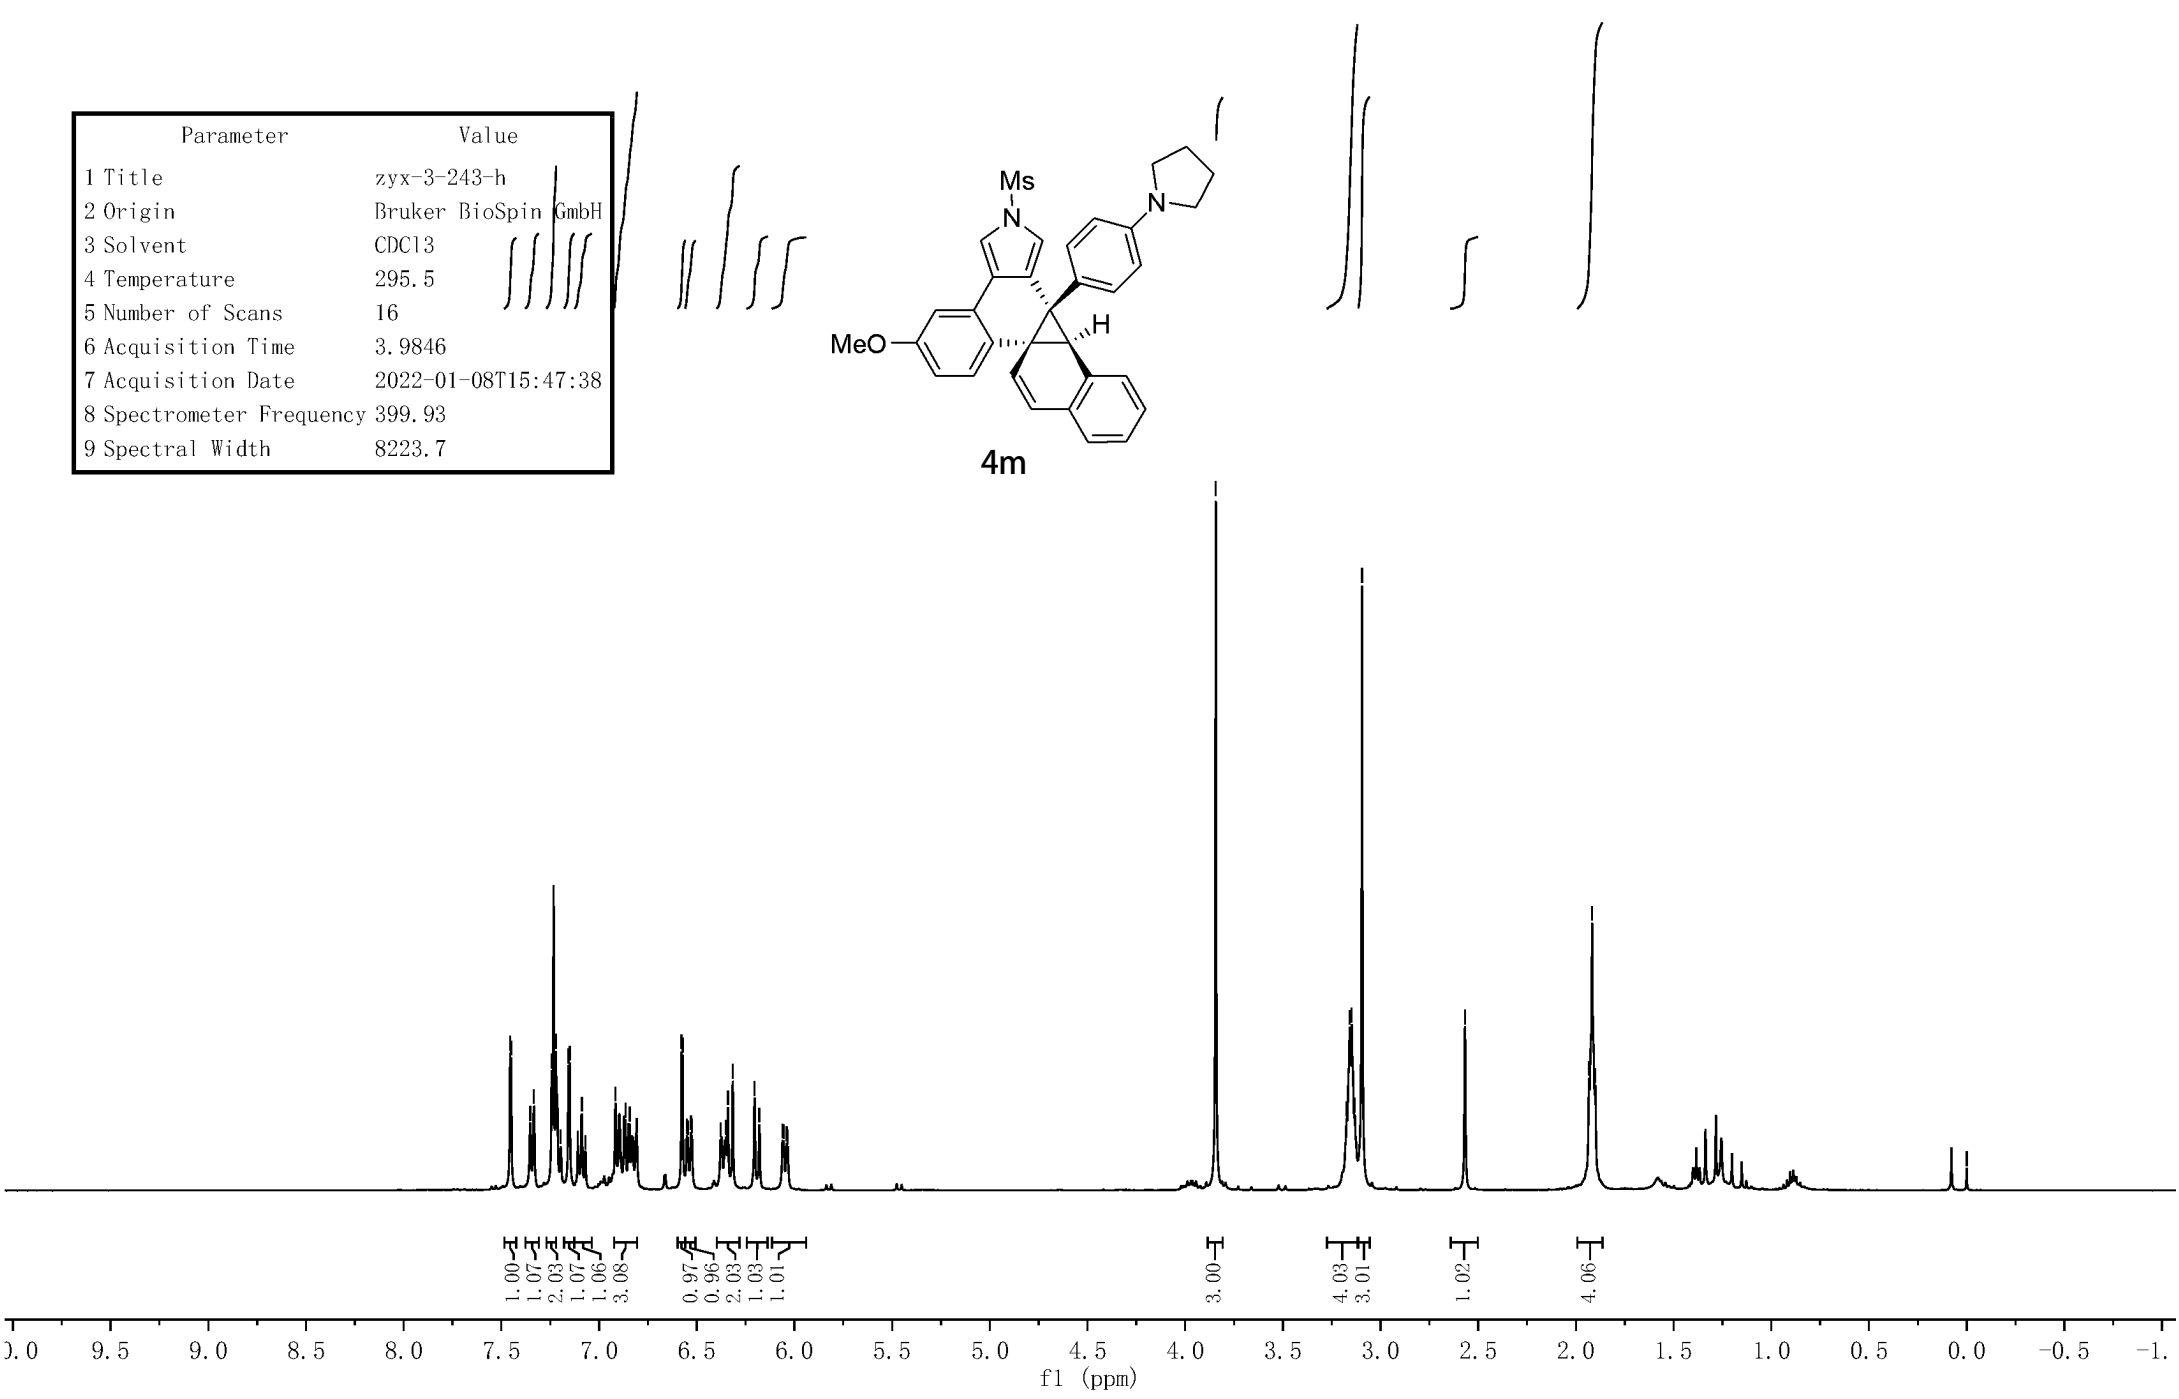

| Parameter                | Value               |
|--------------------------|---------------------|
| 1 Title                  | zyx-3-243-c         |
| 2 Origin                 | Bruker BioSpin GmbH |
| 3 Solvent                | CDCl3               |
| 4 Temperature            | 295.7               |
| 5 Number of Scans        | 77                  |
| 6 Acquisition Time       | 1.3631              |
| 7 Acquisition Date       | 2022-01-08T15:49:43 |
| 8 Spectrometer Frequency | 100.56              |
| 9 Spectral Width         | 24038.5             |

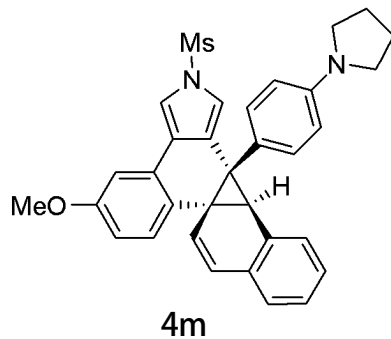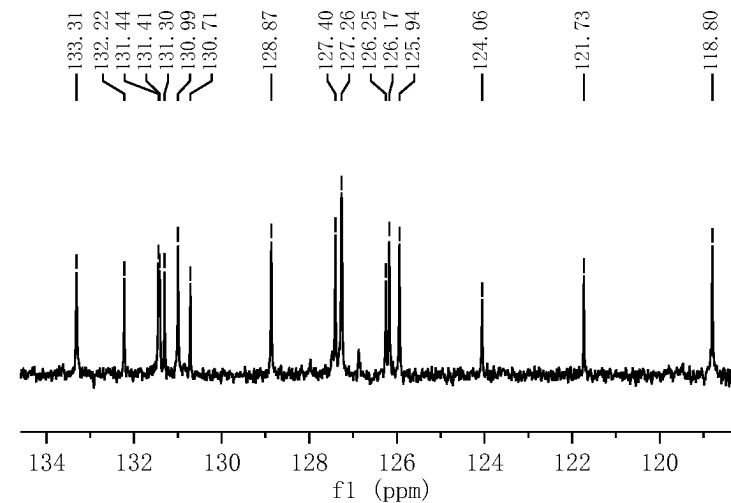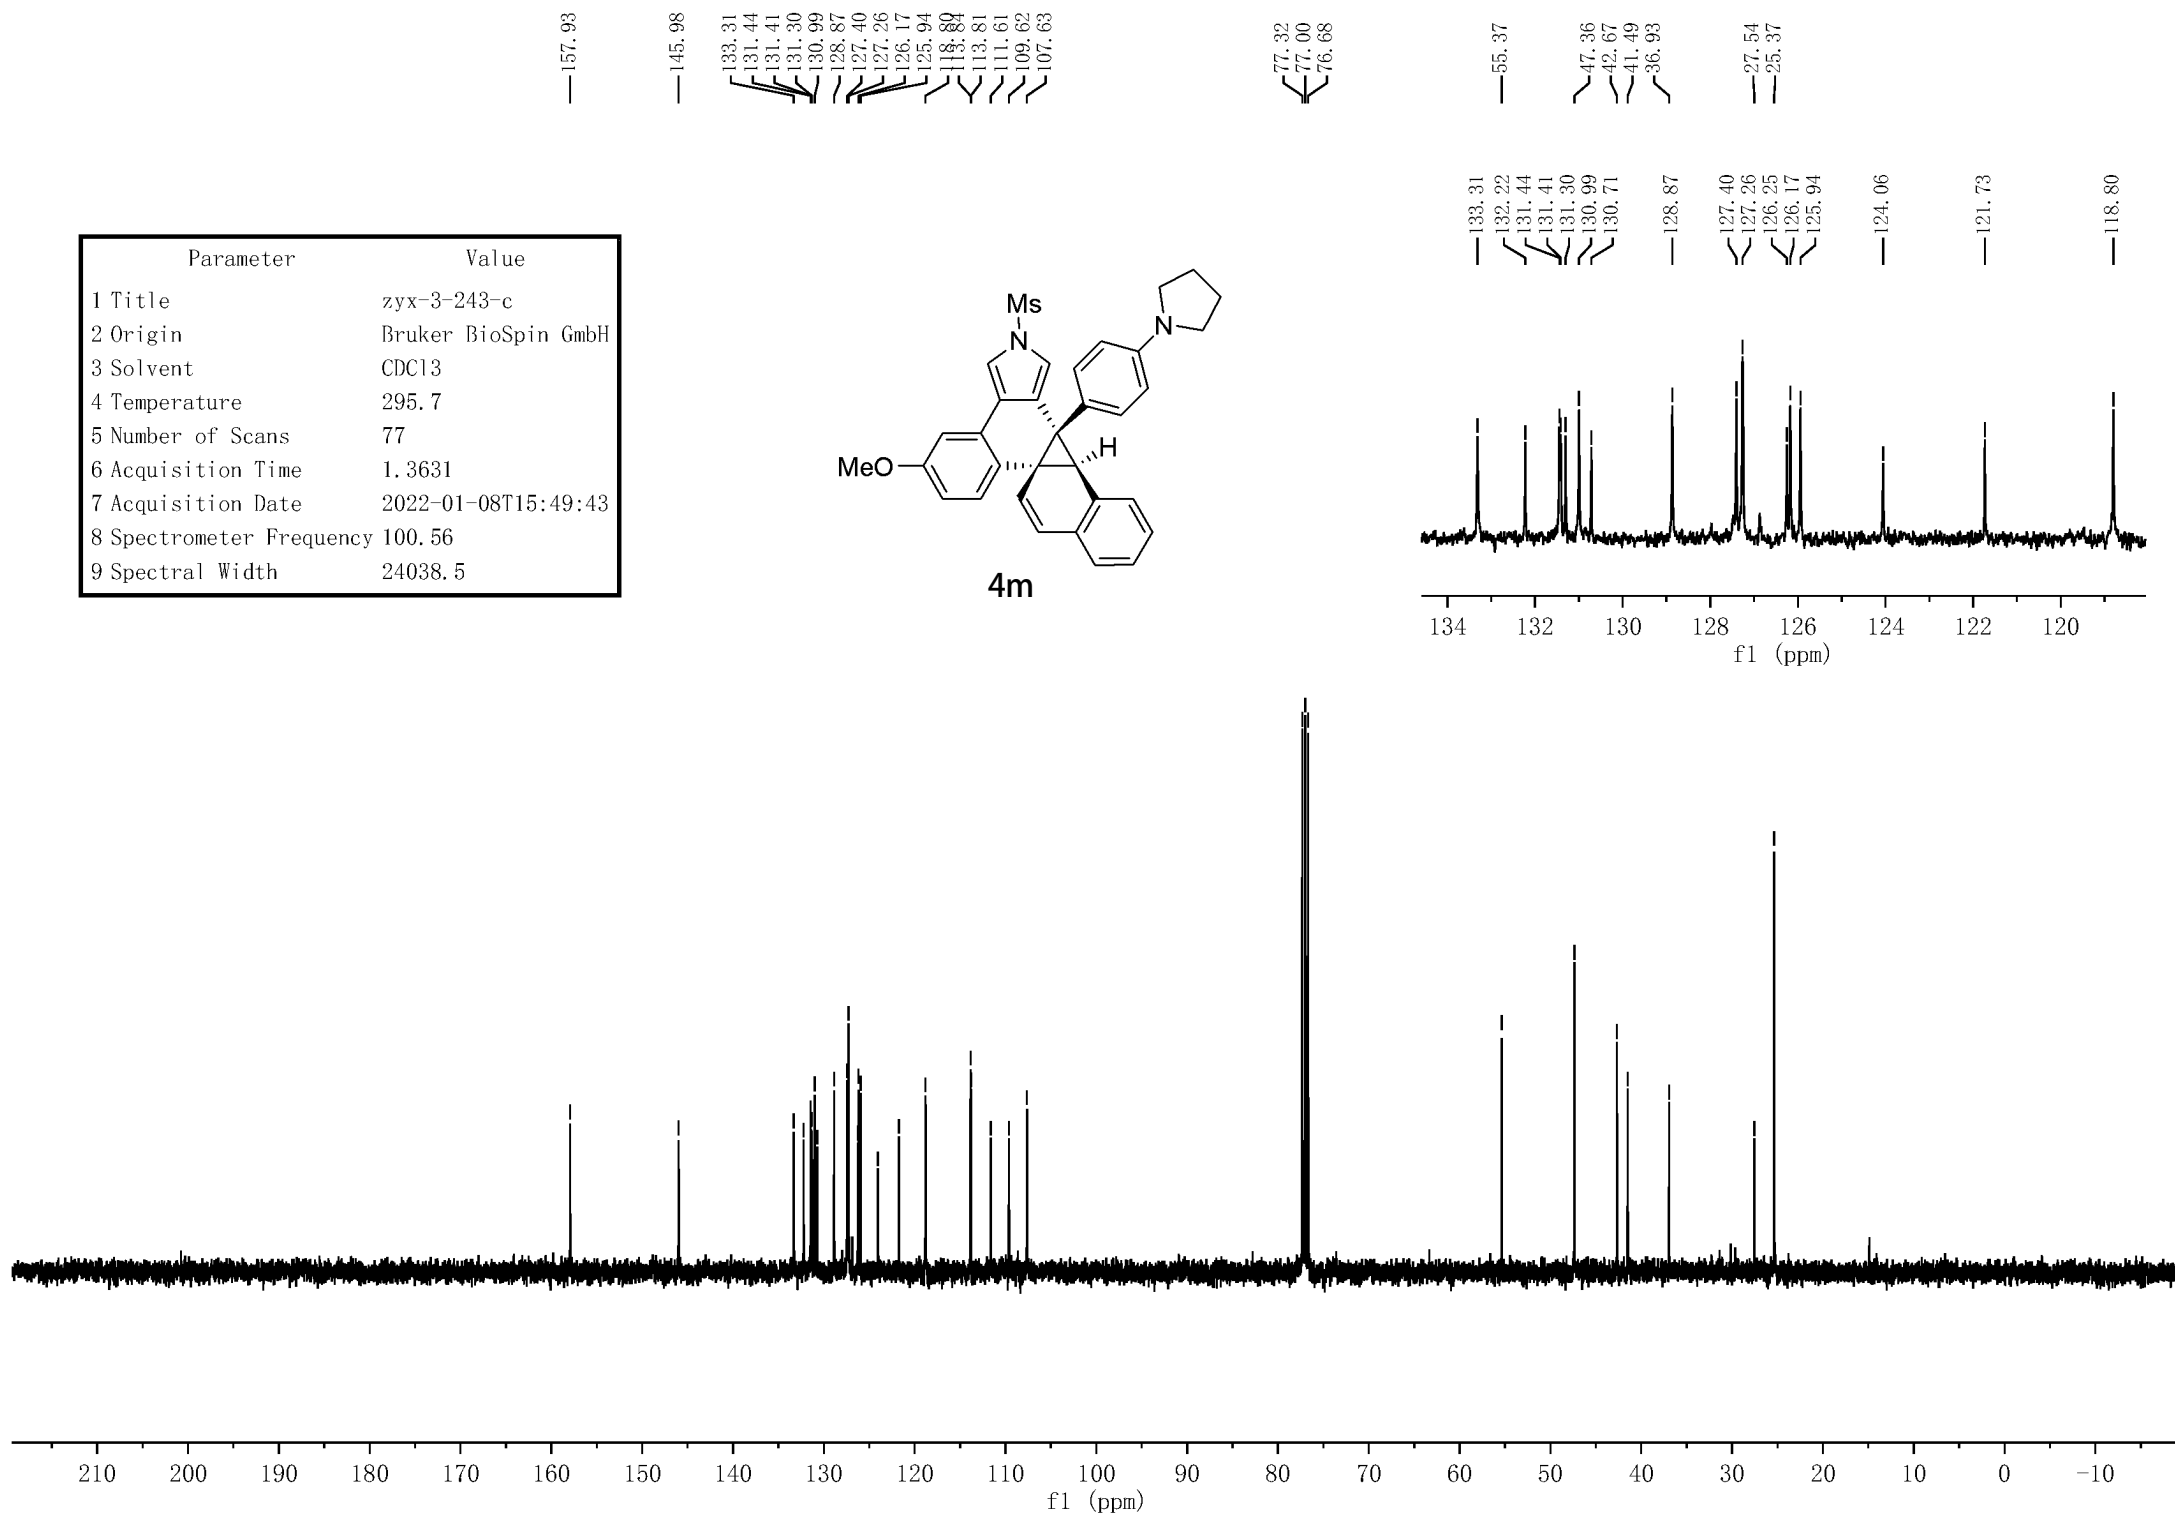



| Parameter                | Value               |
|--------------------------|---------------------|
| 1 Title                  | zyx-4-99--h         |
| 2 Origin                 | Bruker BioSpin GmbH |
| 3 Solvent                | CDCl3               |
| 4 Temperature            | 298.0               |
| 5 Number of Scans        | 8                   |
| 6 Acquisition Time       | 4.0894              |
| 7 Acquisition Date       | 2022-02-28T15:34:03 |
| 8 Spectrometer Frequency | 400.13              |
| 9 Spectral Width         | 8012.8              |

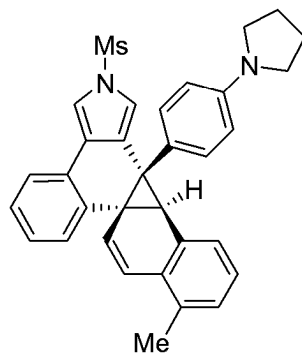

4n

7.646  
7.628  
7.625  
7.458  
7.453  
7.347  
7.344  
7.326  
7.275  
7.272  
7.253  
7.248  
7.207  
7.188  
7.132  
7.113  
7.094  
6.959  
6.941  
6.840  
6.836  
6.819  
6.815  
6.591  
6.567  
6.544  
6.387  
6.382  
6.366  
6.361  
6.260  
6.235  
6.068  
6.063  
6.047  
6.042

3.186  
3.170  
3.159  
3.144  
3.094  
2.618  
2.185  
1.948  
1.932  
1.916

0.000

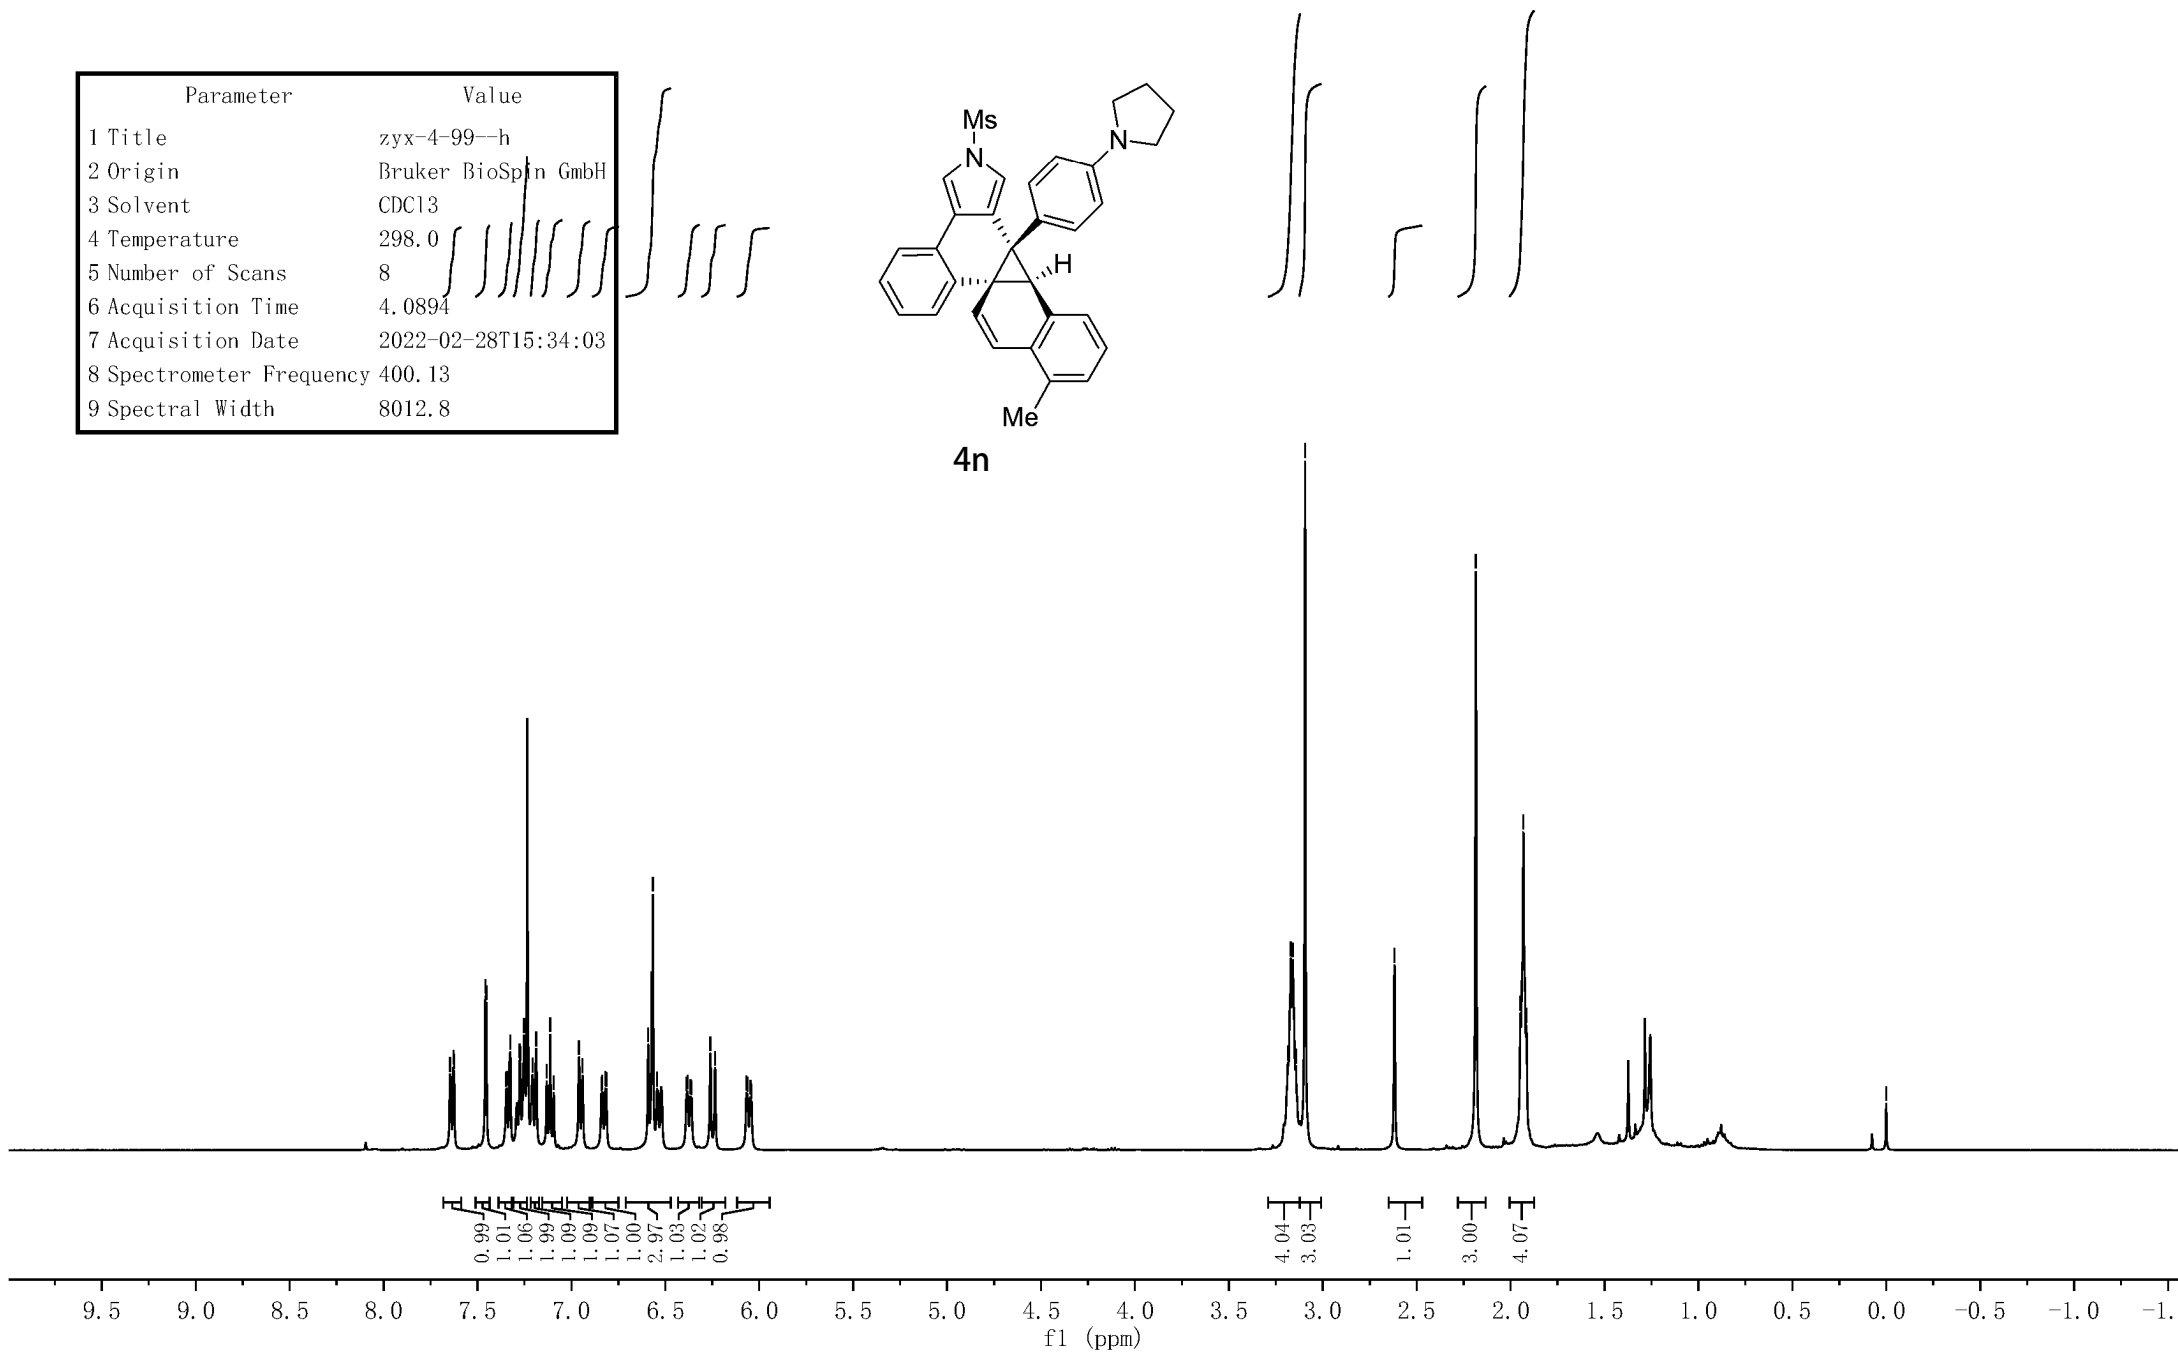

| Parameter                | Value               |
|--------------------------|---------------------|
| 1 Title                  | zyx-4-99-c          |
| 2 Origin                 | Bruker BioSpin GmbH |
| 3 Solvent                | CDCl3               |
| 4 Temperature            | 300.0               |
| 5 Number of Scans        | 109                 |
| 6 Acquisition Time       | 1.3631              |
| 7 Acquisition Date       | 2022-02-26T16:37:46 |
| 8 Spectrometer Frequency | 100.61              |
| 9 Spectral Width         | 24038.5             |

146.14  
133.11  
129.89  
127.93  
127.38  
127.08  
126.99  
126.05  
125.99  
125.30  
123.68  
123.06  
118.74  
111.71  
109.67

77.32  
77.00  
76.68

47.45  
42.67  
41.92  
37.23

27.61  
25.36

19.04

133.91  
133.11  
132.05  
131.37  
131.25  
129.89  
129.58  
127.93  
127.38  
127.08  
126.99  
126.05  
125.99  
125.30  
124.25  
123.68  
123.06  
121.72

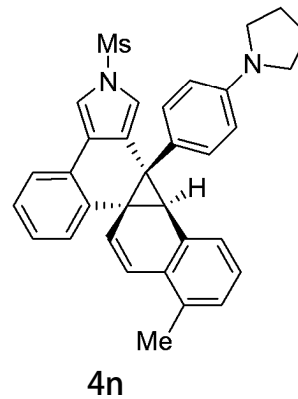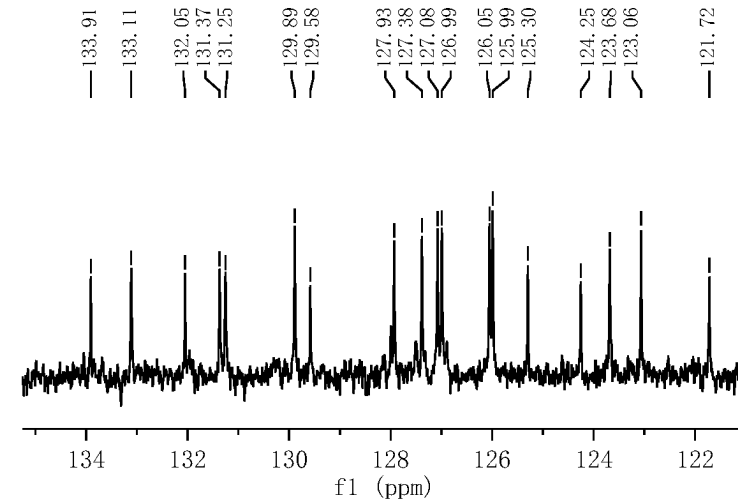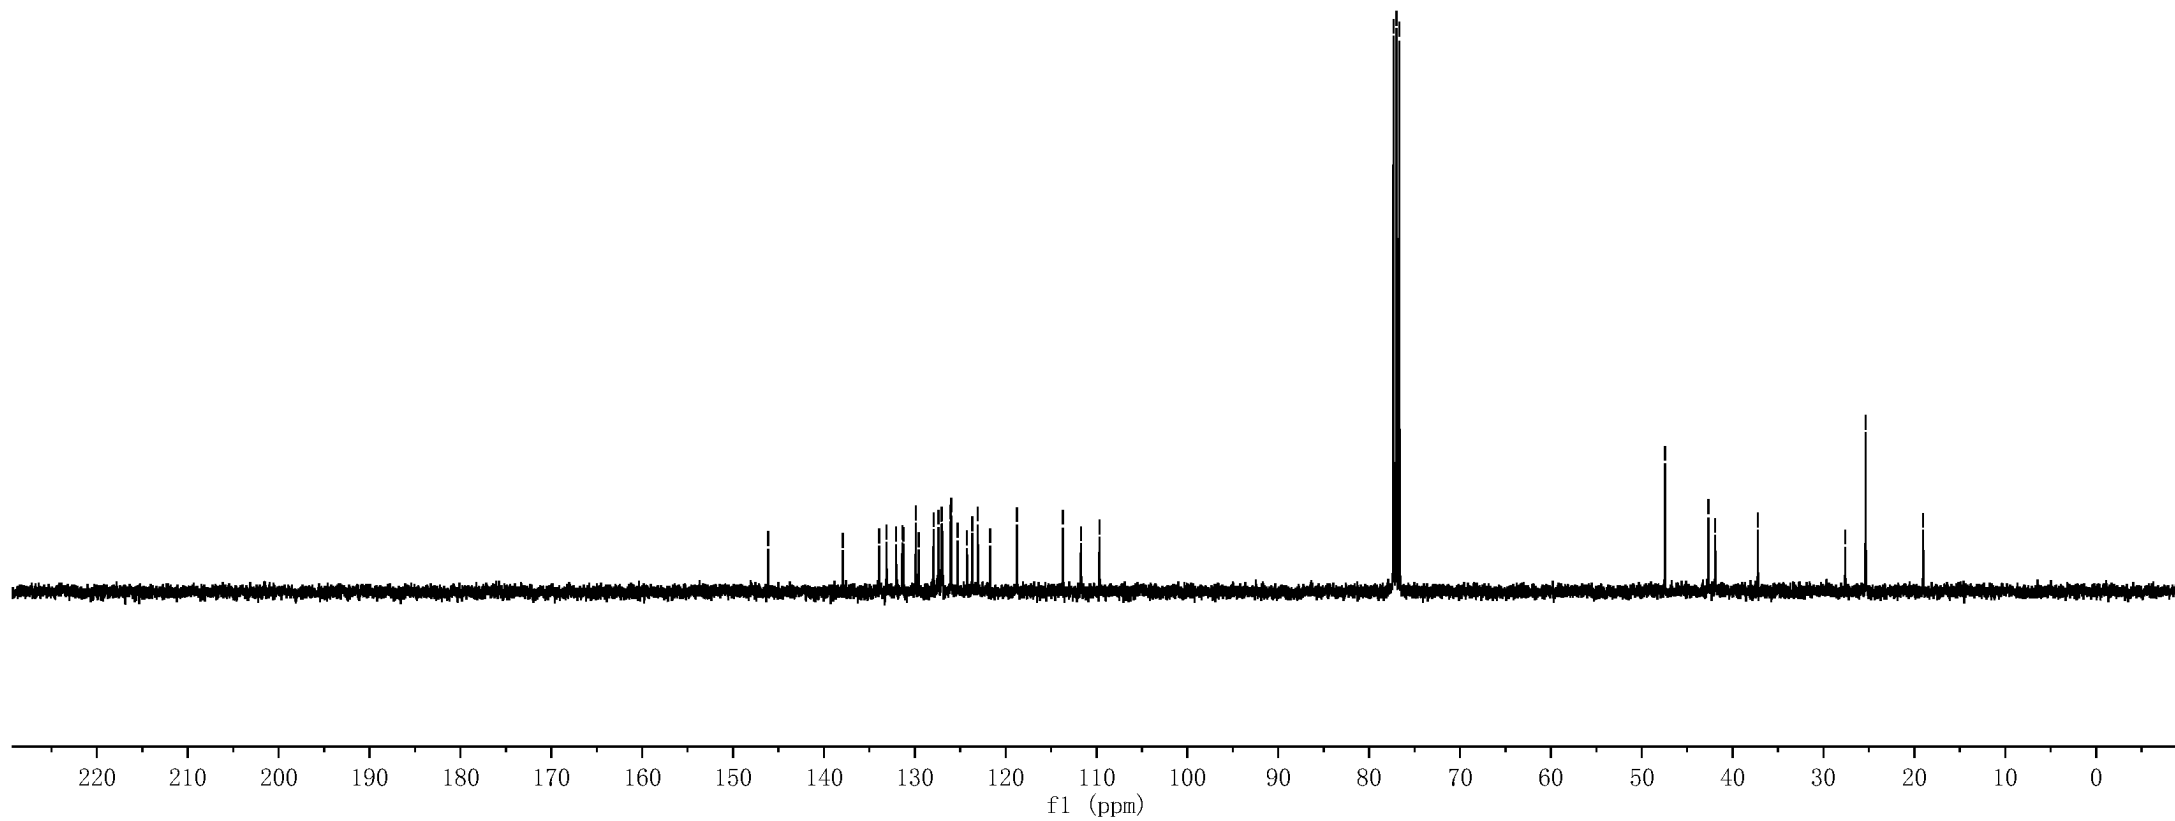

| Parameter                | Value               |
|--------------------------|---------------------|
| 1 Title                  | zyx-4--92--c        |
| 2 Origin                 | Bruker BioSpin GmbH |
| 3 Solvent                | CDCl3               |
| 4 Temperature            | 297.7               |
| 5 Number of Scans        | 38                  |
| 6 Acquisition Time       | 1.1010              |
| 7 Acquisition Date       | 2022-03-08T10:16:25 |
| 8 Spectrometer Frequency | 125.77              |
| 9 Spectral Width         | 29761.9             |

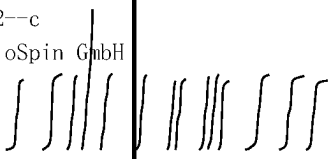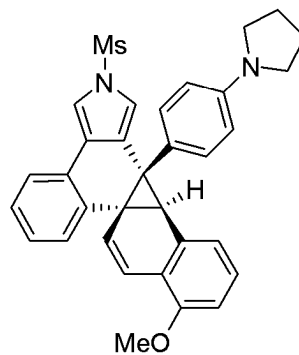

**4o**

7.635  
7.633  
7.620  
7.618  
7.448  
7.444  
7.347  
7.345  
7.332  
7.330  
7.281  
7.266  
7.254  
7.186  
7.170  
7.155  
6.984  
6.968  
6.831  
6.827  
6.814  
6.810  
6.794  
6.774  
6.651  
6.635  
6.612  
6.608  
6.595  
6.591  
6.561  
6.557  
6.376  
6.371  
6.359  
6.354  
6.218  
6.197  
6.092  
6.087  
6.075  
6.070

3.697  
3.180  
3.167  
3.151  
3.138  
3.072  
2.583  
1.936  
1.923  
1.910  
-0.000

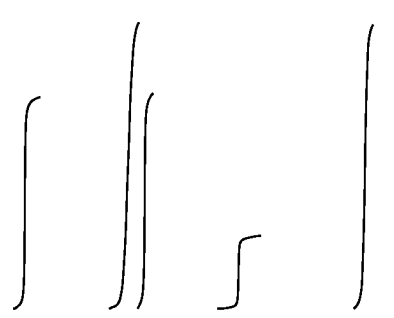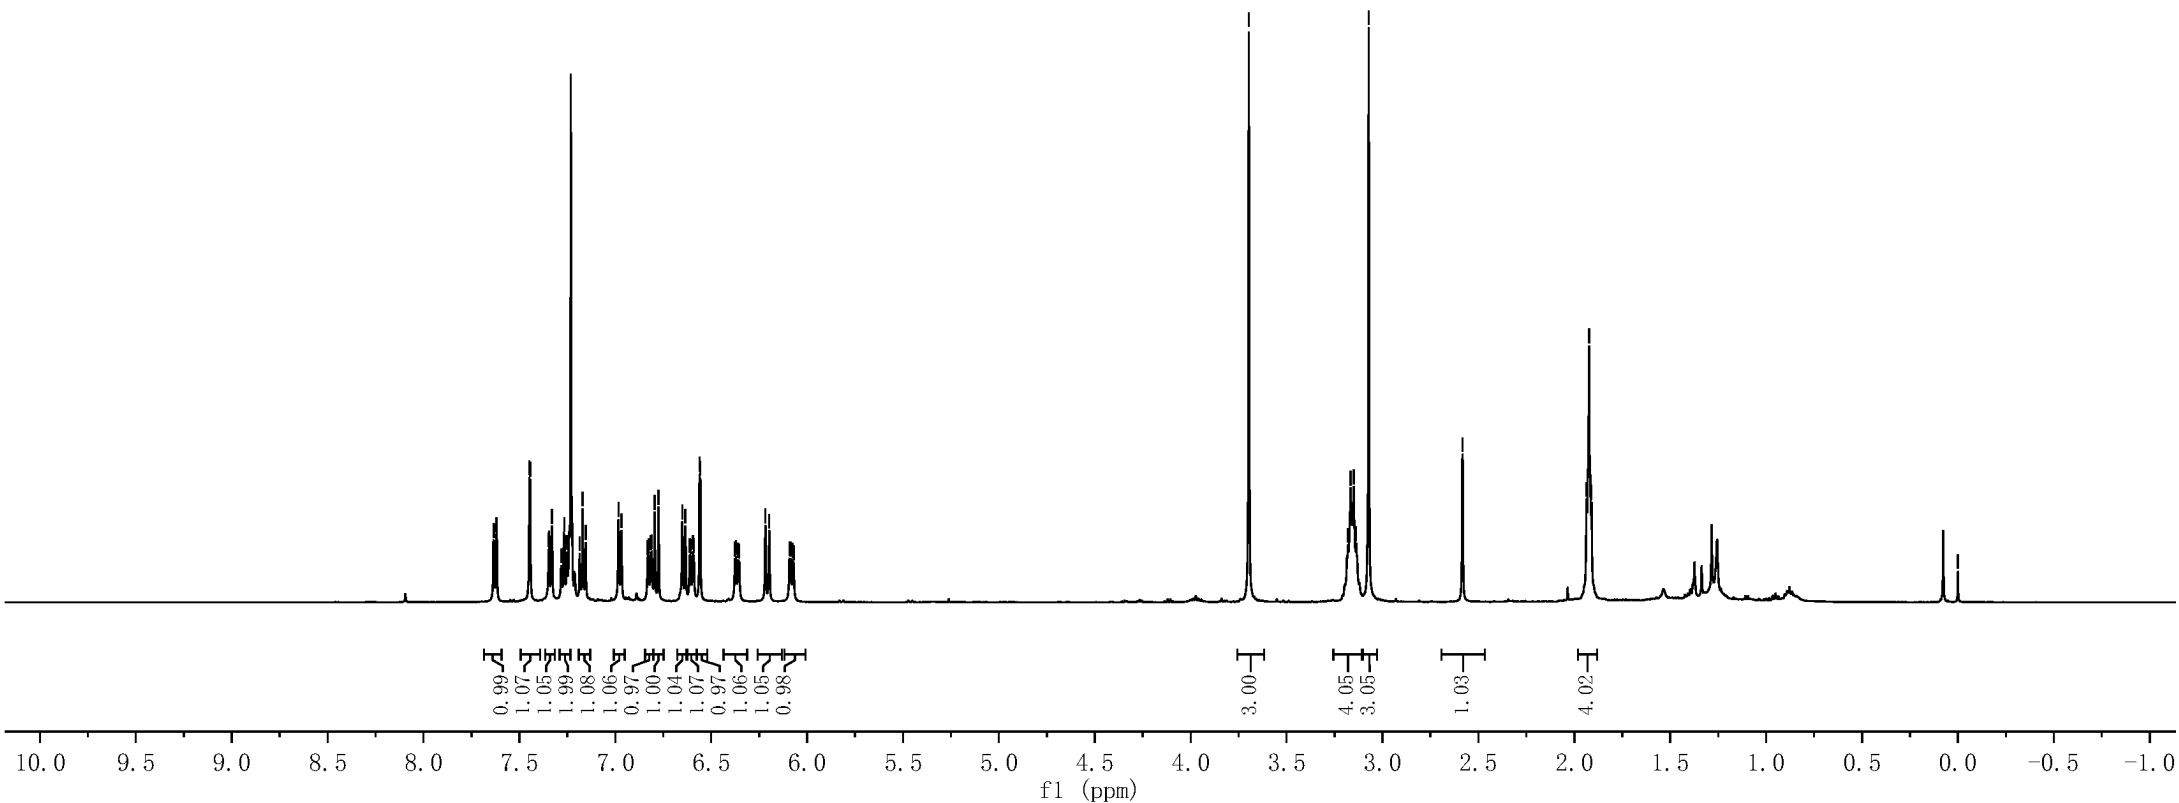

| Parameter                | Value               |
|--------------------------|---------------------|
| 1 Title                  | zyx-4--92--c        |
| 2 Origin                 | Bruker BioSpin GmbH |
| 3 Solvent                | CDCl3               |
| 4 Temperature            | 297.7               |
| 5 Number of Scans        | 38                  |
| 6 Acquisition Time       | 1.1010              |
| 7 Acquisition Date       | 2022-03-08T10:16:25 |
| 8 Spectrometer Frequency | 125.77              |
| 9 Spectral Width         | 29761.9             |

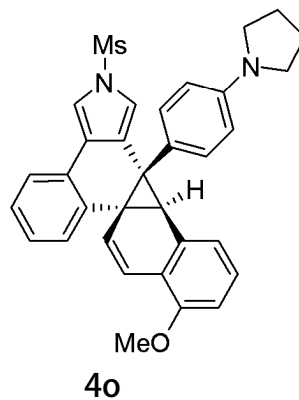

155.13  
146.11  
133.34  
133.08  
131.16  
129.94  
127.84  
127.39  
126.04  
124.96  
123.03  
121.72  
120.69  
118.70  
118.68  
111.78  
109.78  
108.18

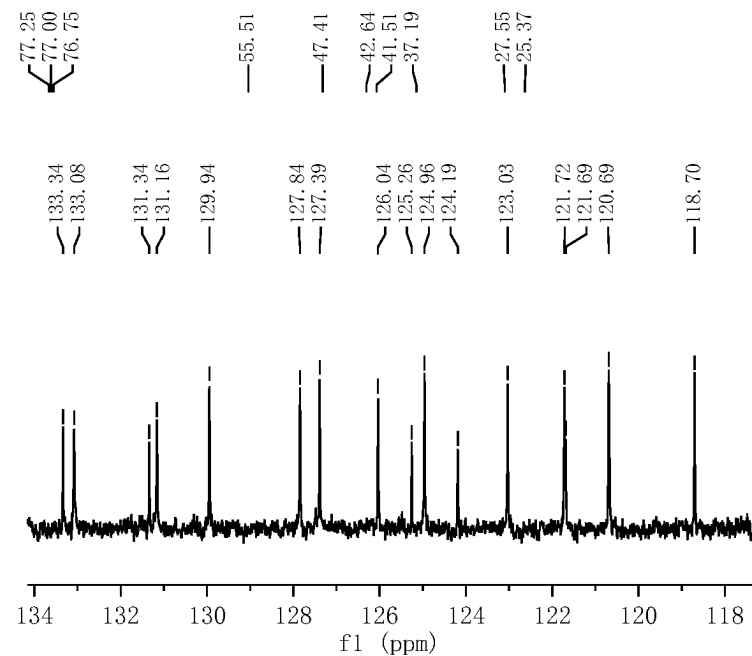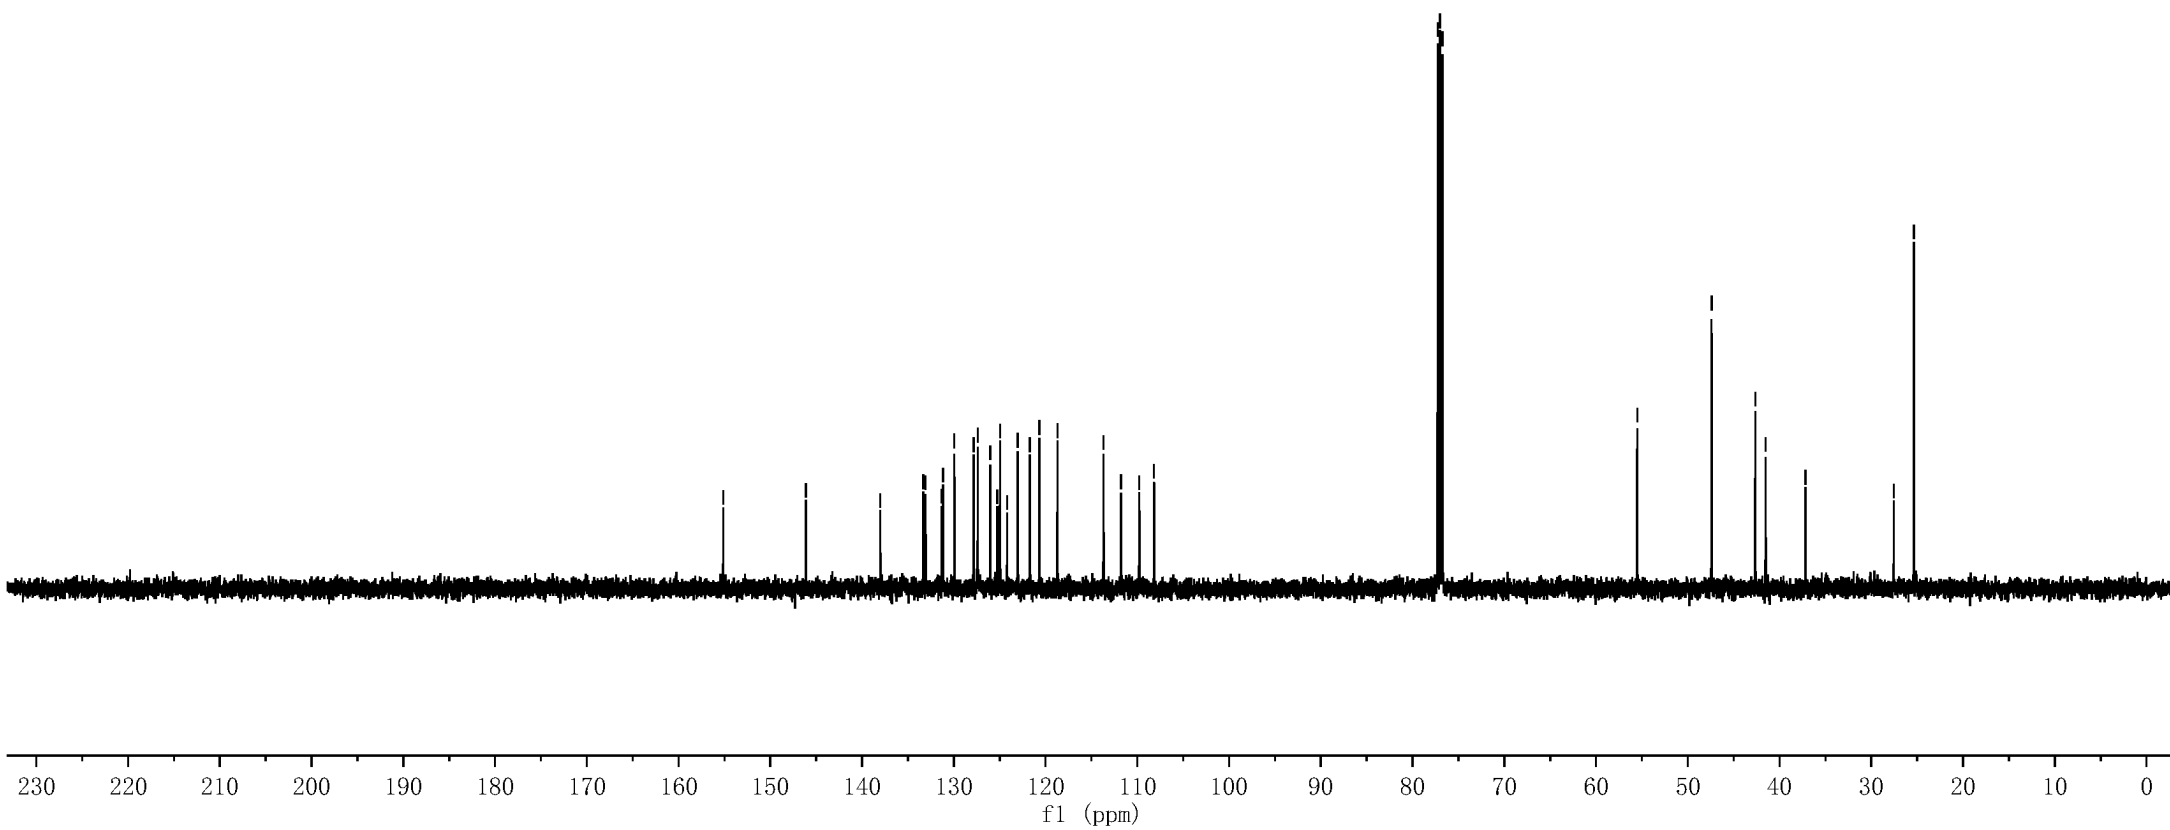

| Parameter                | Value               |
|--------------------------|---------------------|
| 1 Title                  | ZYX-3-232-H         |
| 2 Origin                 | Bruker BioSpin GmbH |
| 3 Solvent                | CDCl3               |
| 4 Temperature            | 298.0               |
| 5 Number of Scans        | 13                  |
| 6 Acquisition Time       | 4.0894              |
| 7 Acquisition Date       | 2022-01-05T17:04:19 |
| 8 Spectrometer Frequency | 400.13              |
| 9 Spectral Width         | 8012.8              |

7.640  
7.622  
7.464  
7.459  
7.289  
7.260  
7.240  
7.226  
7.177  
7.172  
7.157  
7.152  
6.884  
6.880  
6.805  
6.801  
6.784  
6.779  
6.586  
6.581  
6.558  
6.554  
6.537  
6.533  
6.373  
6.367  
6.352  
6.346  
6.294  
6.268  
6.240  
6.105  
6.100  
6.084  
6.079

3.244  
3.165  
3.124  
3.089

2.576

1.942  
1.926  
1.911

0.000

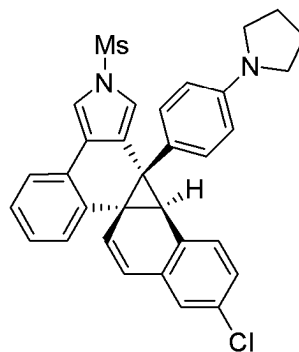

4p

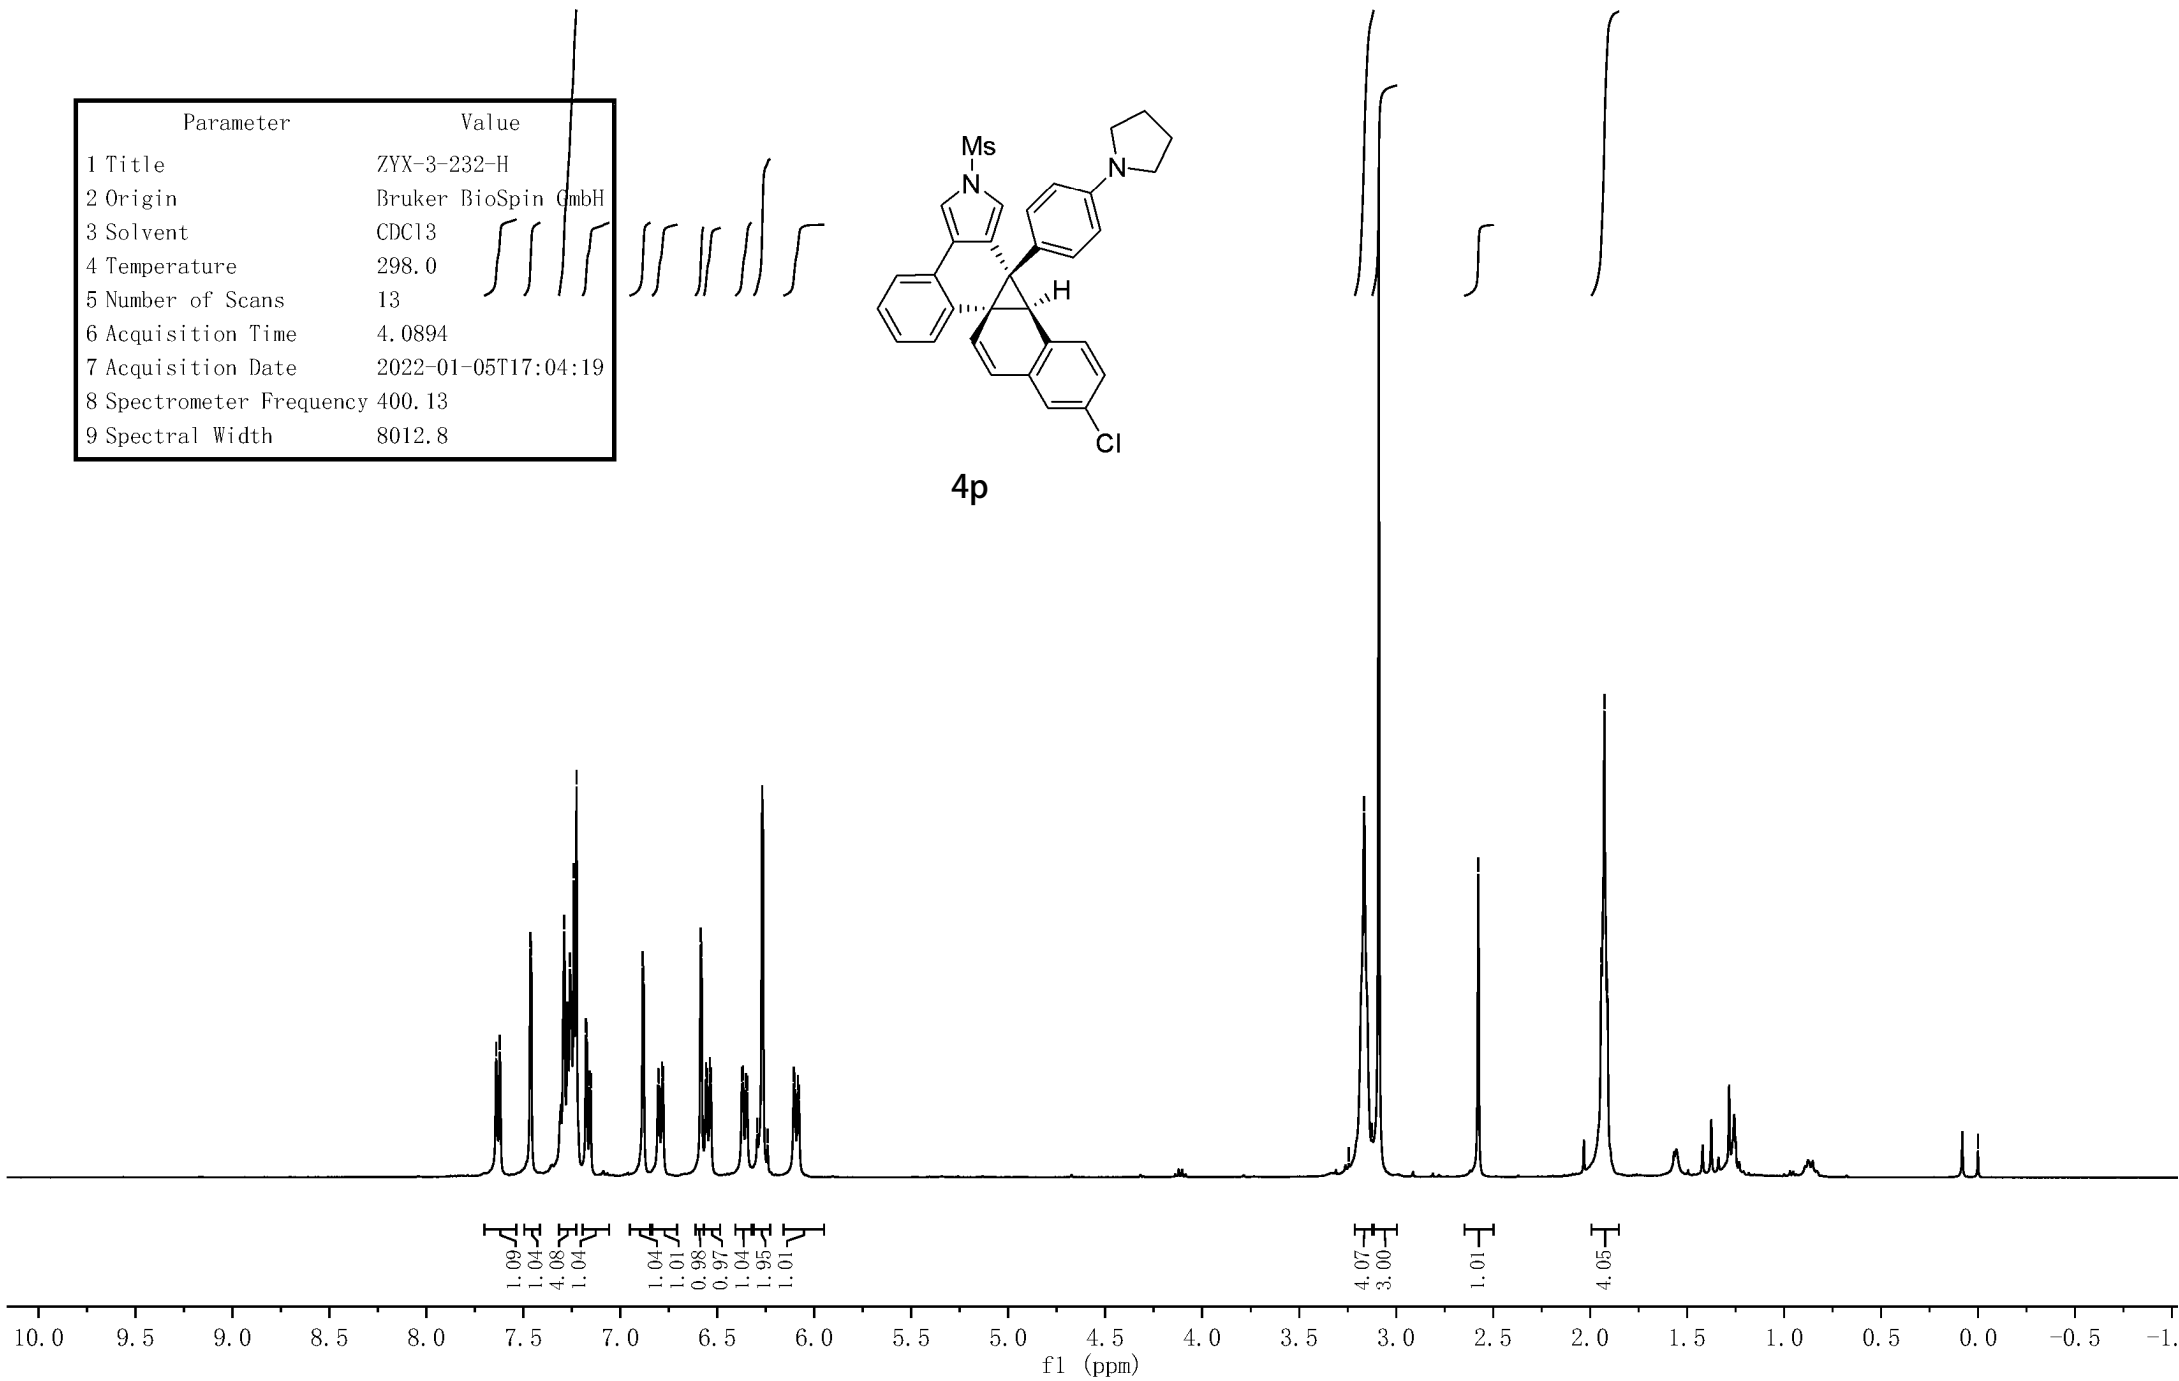

| Parameter                | Value               |
|--------------------------|---------------------|
| 1 Title                  | ZYX-3-232-C         |
| 2 Origin                 | Bruker BioSpin GmbH |
| 3 Solvent                | CDCl3               |
| 4 Temperature            | 300.0               |
| 5 Number of Scans        | 55                  |
| 6 Acquisition Time       | 1.3631              |
| 7 Acquisition Date       | 2022-01-05T17:06:34 |
| 8 Spectrometer Frequency | 100.61              |
| 9 Spectral Width         | 24038.5             |

146.10  
133.23  
131.44  
130.01  
129.82  
127.50  
127.47  
127.29  
126.92  
126.40  
126.28  
123.13  
118.87  
111.69  
109.82

77.32  
77.00  
76.68  
47.36  
42.68  
40.97  
37.42  
28.23  
25.37

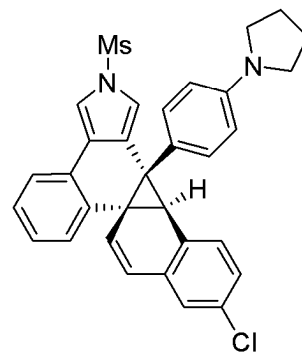

4p

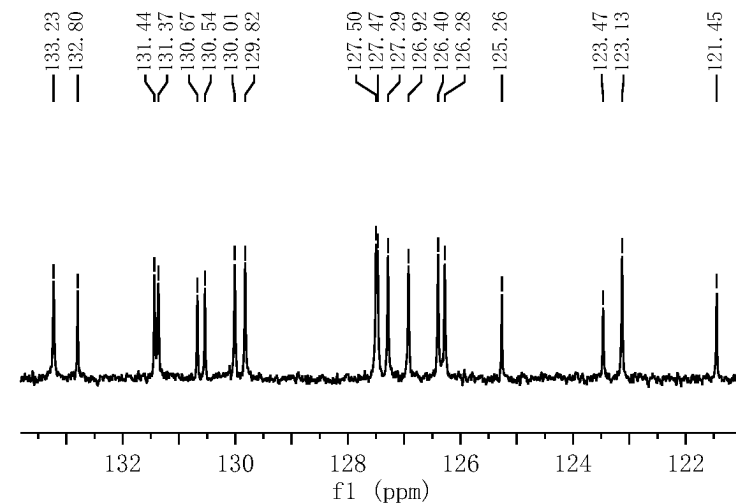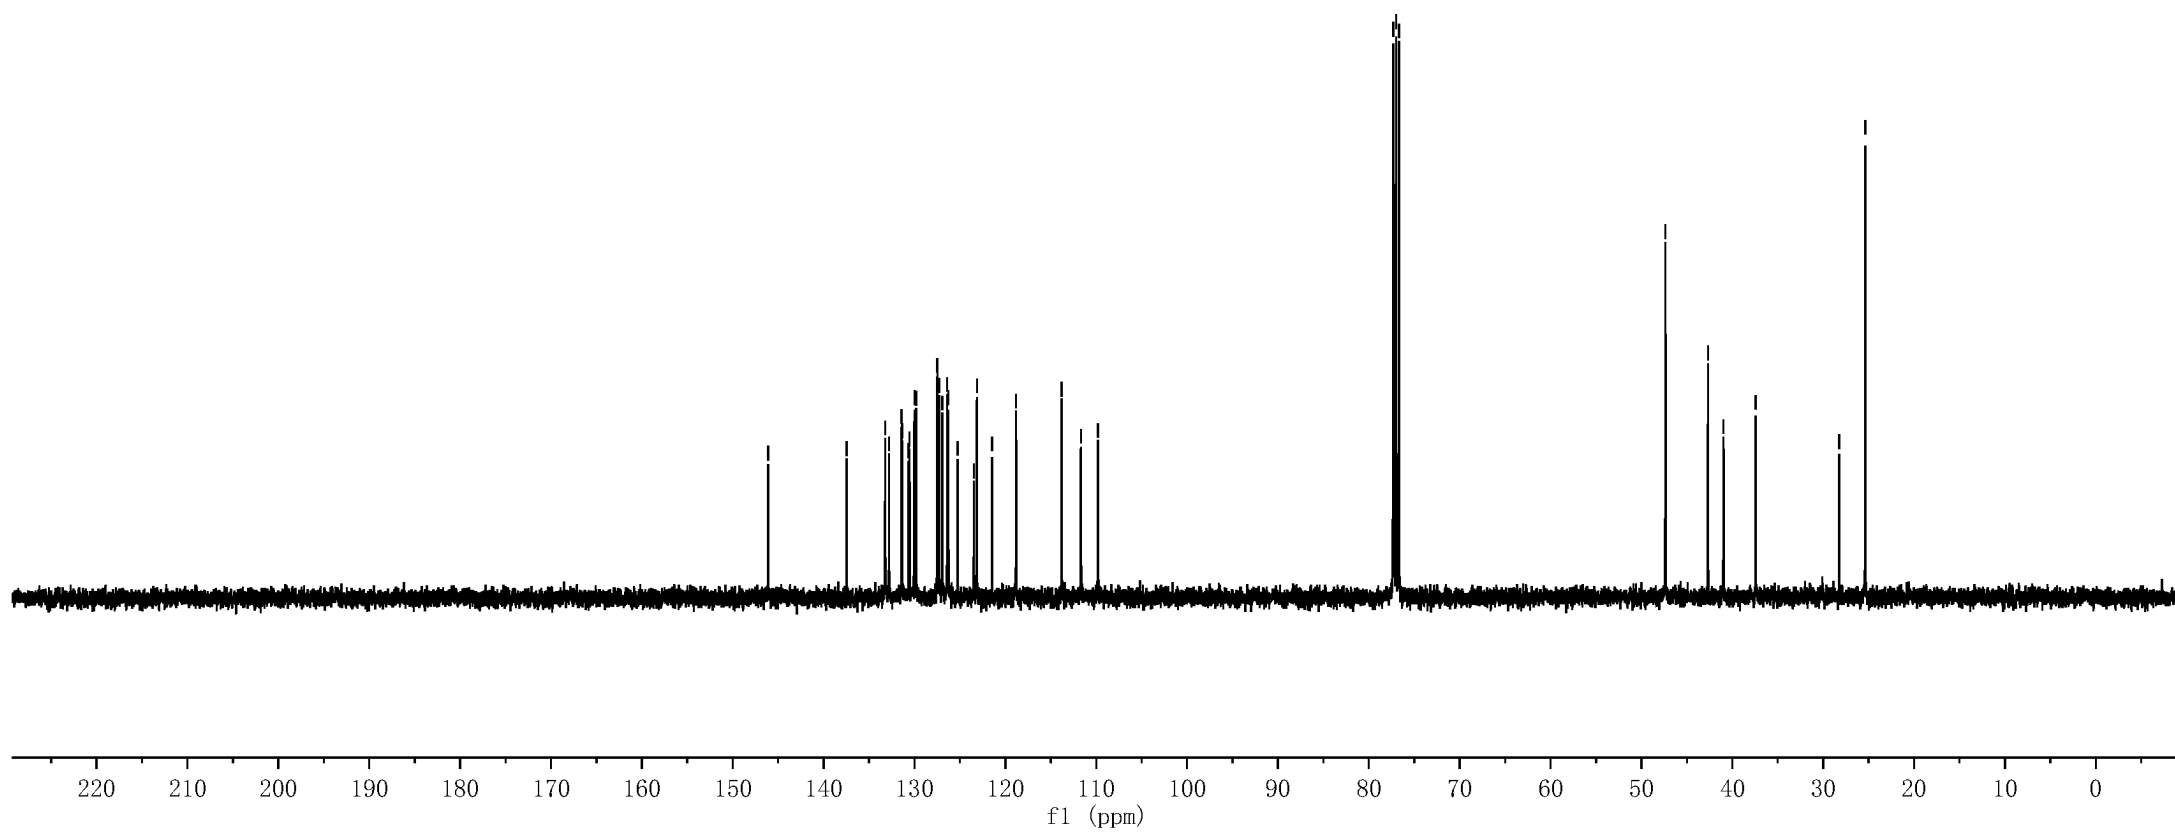

7.643  
7.638  
7.625  
7.621  
7.455  
7.449  
7.338  
7.319  
7.289  
7.271  
7.226  
7.212  
7.208  
7.083  
7.079  
7.064  
7.060  
6.846  
6.841  
6.825  
6.819  
6.766  
6.763  
6.580  
6.564  
6.558  
6.390  
6.384  
6.369  
6.362  
6.339  
6.314  
6.211  
6.186  
6.083  
6.076  
6.061  
6.055

3.188  
3.172  
3.162  
3.157  
3.095  
2.602  
2.576  
2.558  
2.539  
1.945  
1.936  
1.929  
1.913

1.206  
1.187  
1.168

0.000

| Parameter                | Value               |
|--------------------------|---------------------|
| 1 Title                  | ZYX-3-228-H         |
| 2 Origin                 | Bruker BioSpin GmbH |
| 3 Solvent                | CDCl3               |
| 4 Temperature            | 295.4               |
| 5 Number of Scans        | 15                  |
| 6 Acquisition Time       | 3.9846              |
| 7 Acquisition Date       | 2022-01-01T14:49:19 |
| 8 Spectrometer Frequency | 399.93              |
| 9 Spectral Width         | 8223.7              |

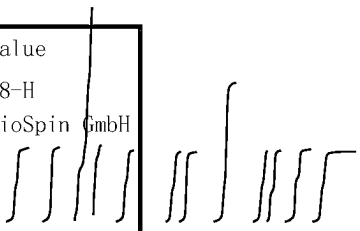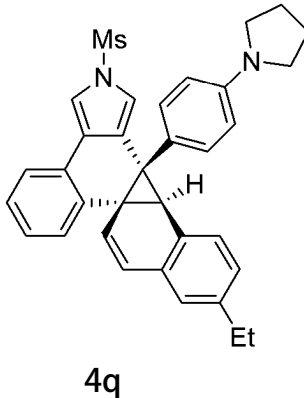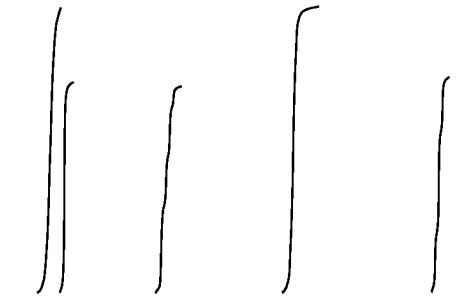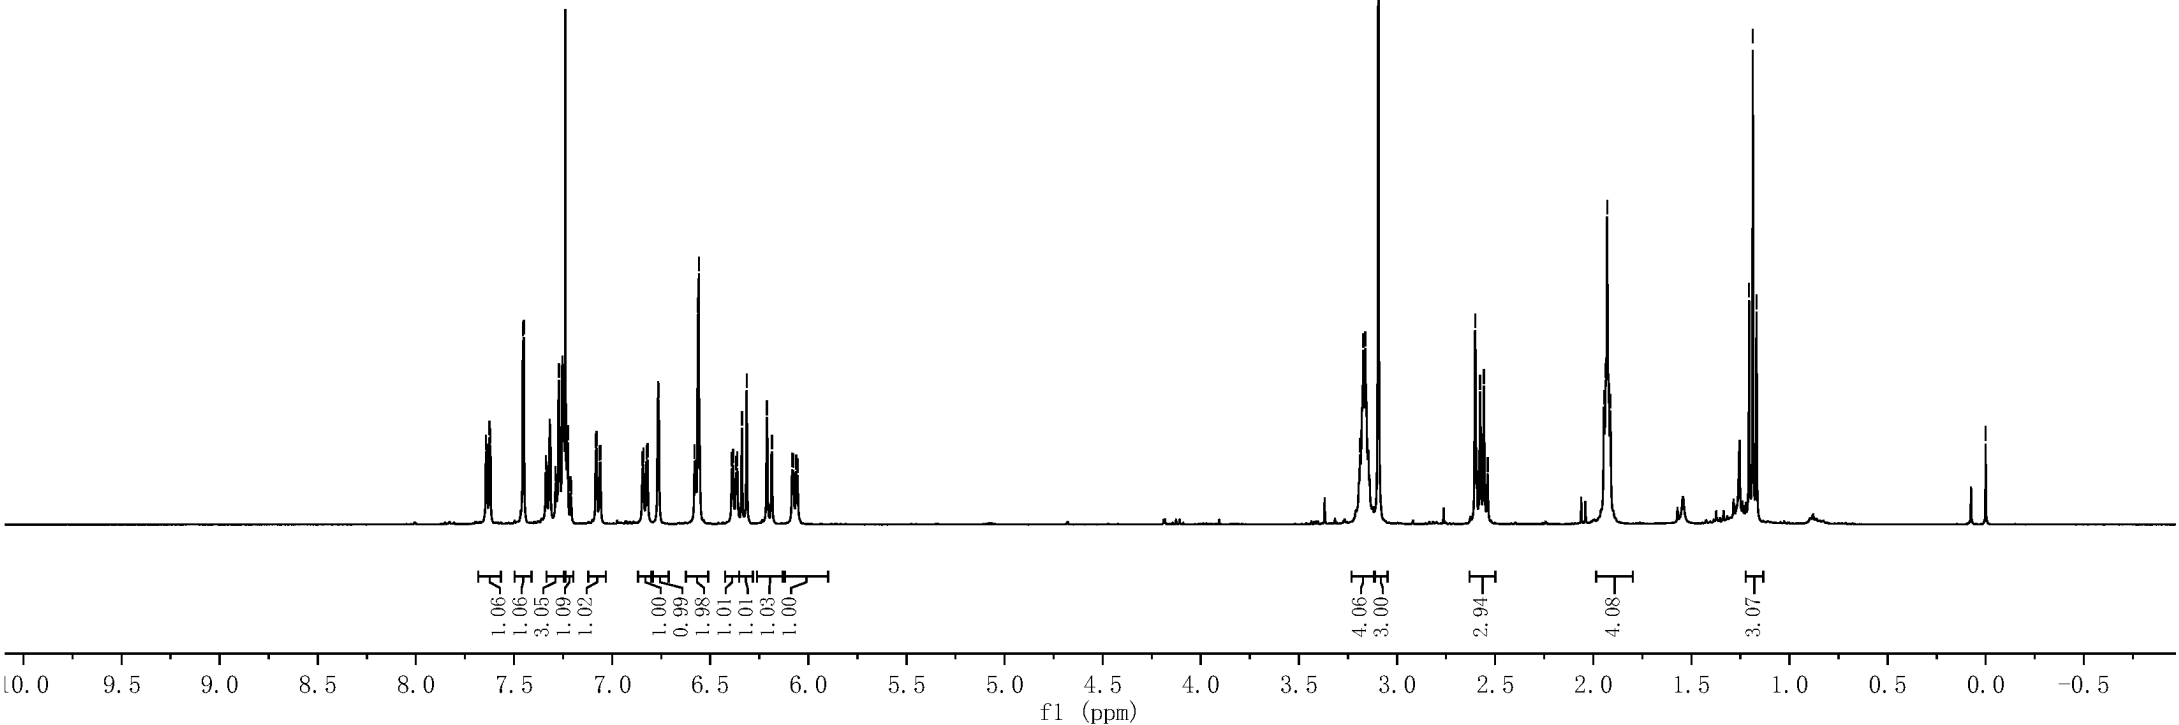

10.0 9.5 9.0 8.5 8.0 7.5 7.0 6.5 6.0 5.5 5.0 4.5 4.0 3.5 3.0 2.5 2.0 1.5 1.0 0.5 0.0 -0.5

f1 (ppm)

| Parameter                | Value               |
|--------------------------|---------------------|
| 1 Title                  | ZYX-3-228-C         |
| 2 Origin                 | Bruker BioSpin GmbH |
| 3 Solvent                | CDC13               |
| 4 Temperature            | 295.9               |
| 5 Number of Scans        | 61                  |
| 6 Acquisition Time       | 1.3631              |
| 7 Acquisition Date       | 2022-01-01T14:51:42 |
| 8 Spectrometer Frequency | 100.56              |
| 9 Spectral Width         | 24038.5             |

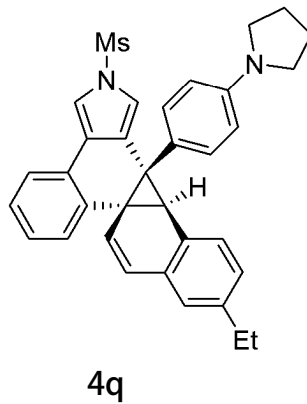

145.98  
142.01  
138.05  
133.29  
131.47  
131.41  
131.19  
129.92  
129.32  
128.81  
127.53  
127.38  
127.17  
126.79  
126.02  
125.90  
125.25  
124.21  
123.04  
121.73  
118.66  
113.70  
111.62  
109.70

77.32  
77.00  
76.68

47.39  
42.67  
41.22  
37.21

28.43  
27.90  
25.39

15.58

131.47  
131.41  
131.19

129.92  
129.32  
128.81

127.53  
127.38  
127.17  
126.79

126.02  
125.90  
125.25

124.21

123.04

121.73

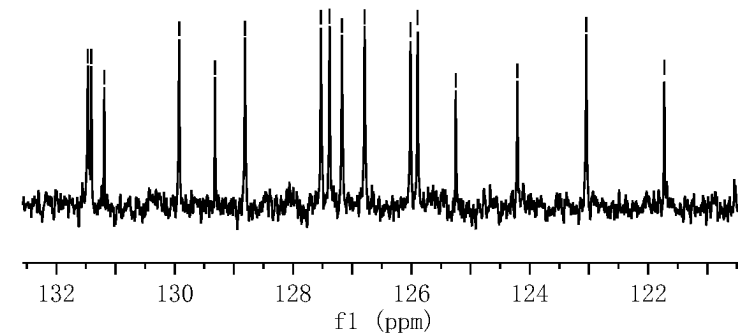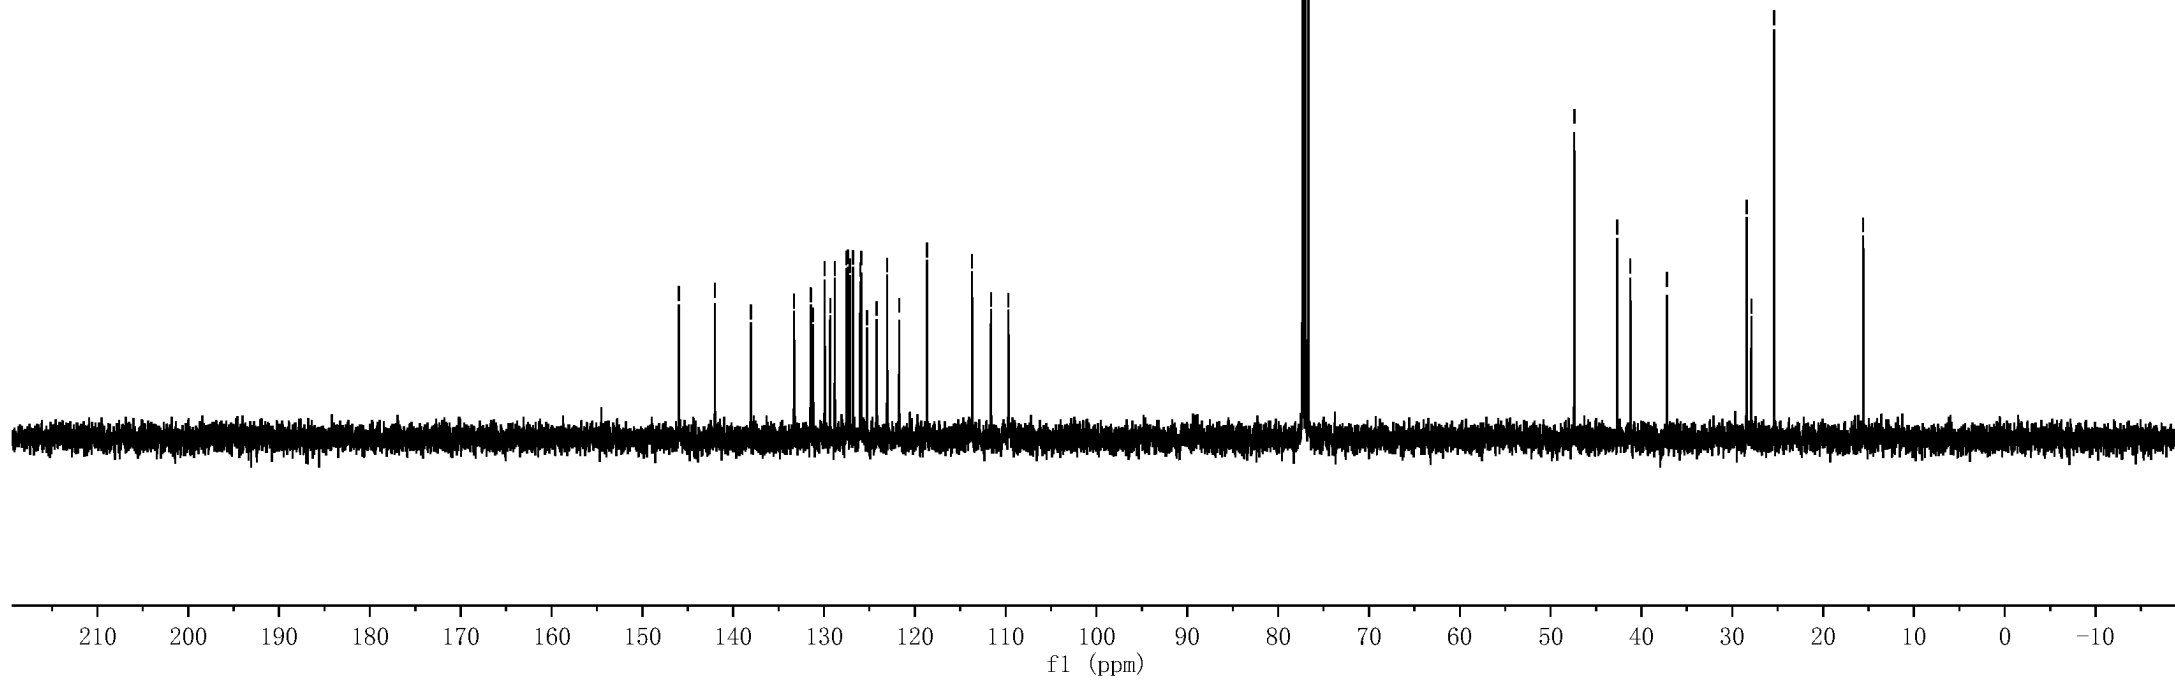



| Parameter                | Value               |
|--------------------------|---------------------|
| 1 Title                  | zyx-3-201-h         |
| 2 Origin                 | Bruker BioSpin GmbH |
| 3 Solvent                | CDCl3               |
| 4 Temperature            | 298.0               |
| 5 Number of Scans        | 9                   |
| 6 Acquisition Time       | 4.0894              |
| 7 Acquisition Date       | 2021-12-20T16:40:58 |
| 8 Spectrometer Frequency | 400.13              |
| 9 Spectral Width         | 8012.8              |

7.627  
7.609  
7.446  
7.441  
7.319  
7.302  
7.273  
7.217  
7.196  
7.166  
6.832  
6.806  
6.785  
6.594  
6.562  
6.556  
6.469  
6.463  
6.377  
6.359  
6.309  
6.284  
6.234  
6.210  
6.096  
6.077

3.727  
3.226  
3.160  
3.151  
3.066  
2.579  
1.978  
1.914  
1.835  
0.000

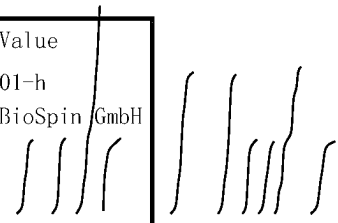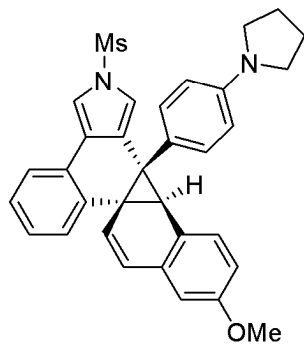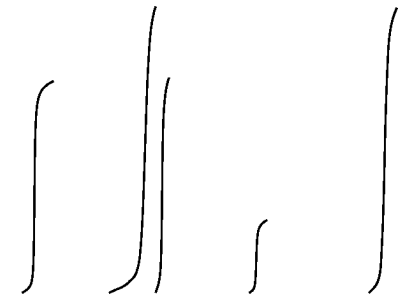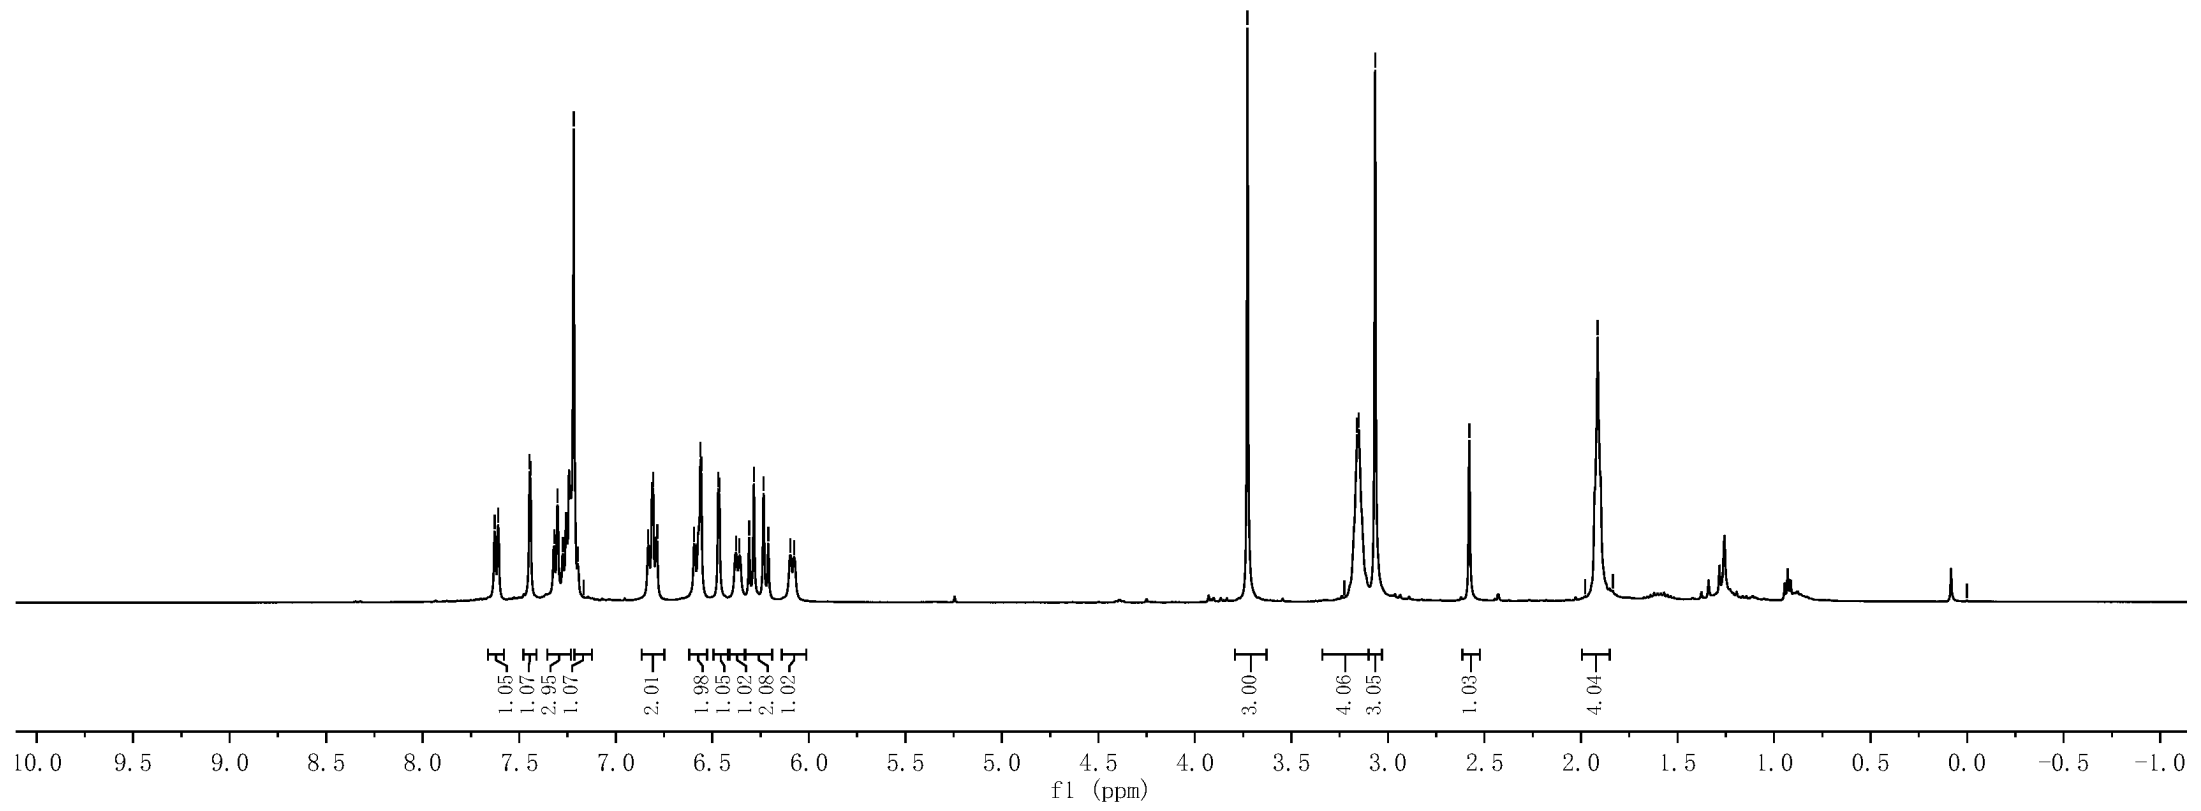

| Parameter                | Value               |
|--------------------------|---------------------|
| 1 Title                  | zyx-3-201-c         |
| 2 Origin                 | Bruker BioSpin GmbH |
| 3 Solvent                | CDCl3               |
| 4 Temperature            | 300.0               |
| 5 Number of Scans        | 54                  |
| 6 Acquisition Time       | 1.3631              |
| 7 Acquisition Date       | 2021-12-20T16:42:21 |
| 8 Spectrometer Frequency | 100.61              |
| 9 Spectral Width         | 24038.5             |

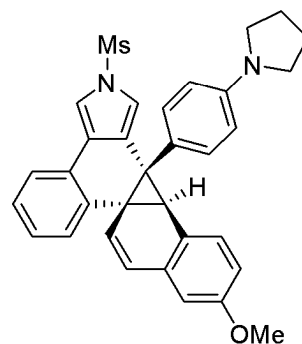

4r

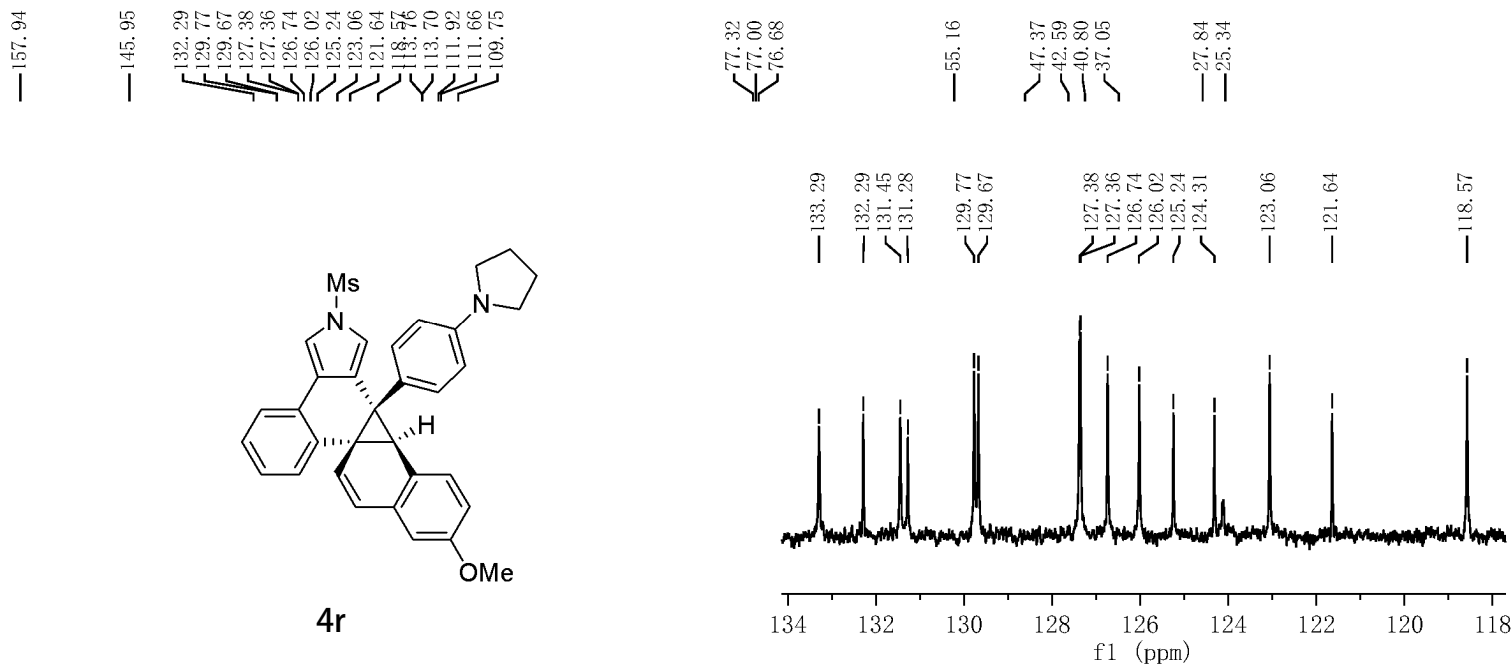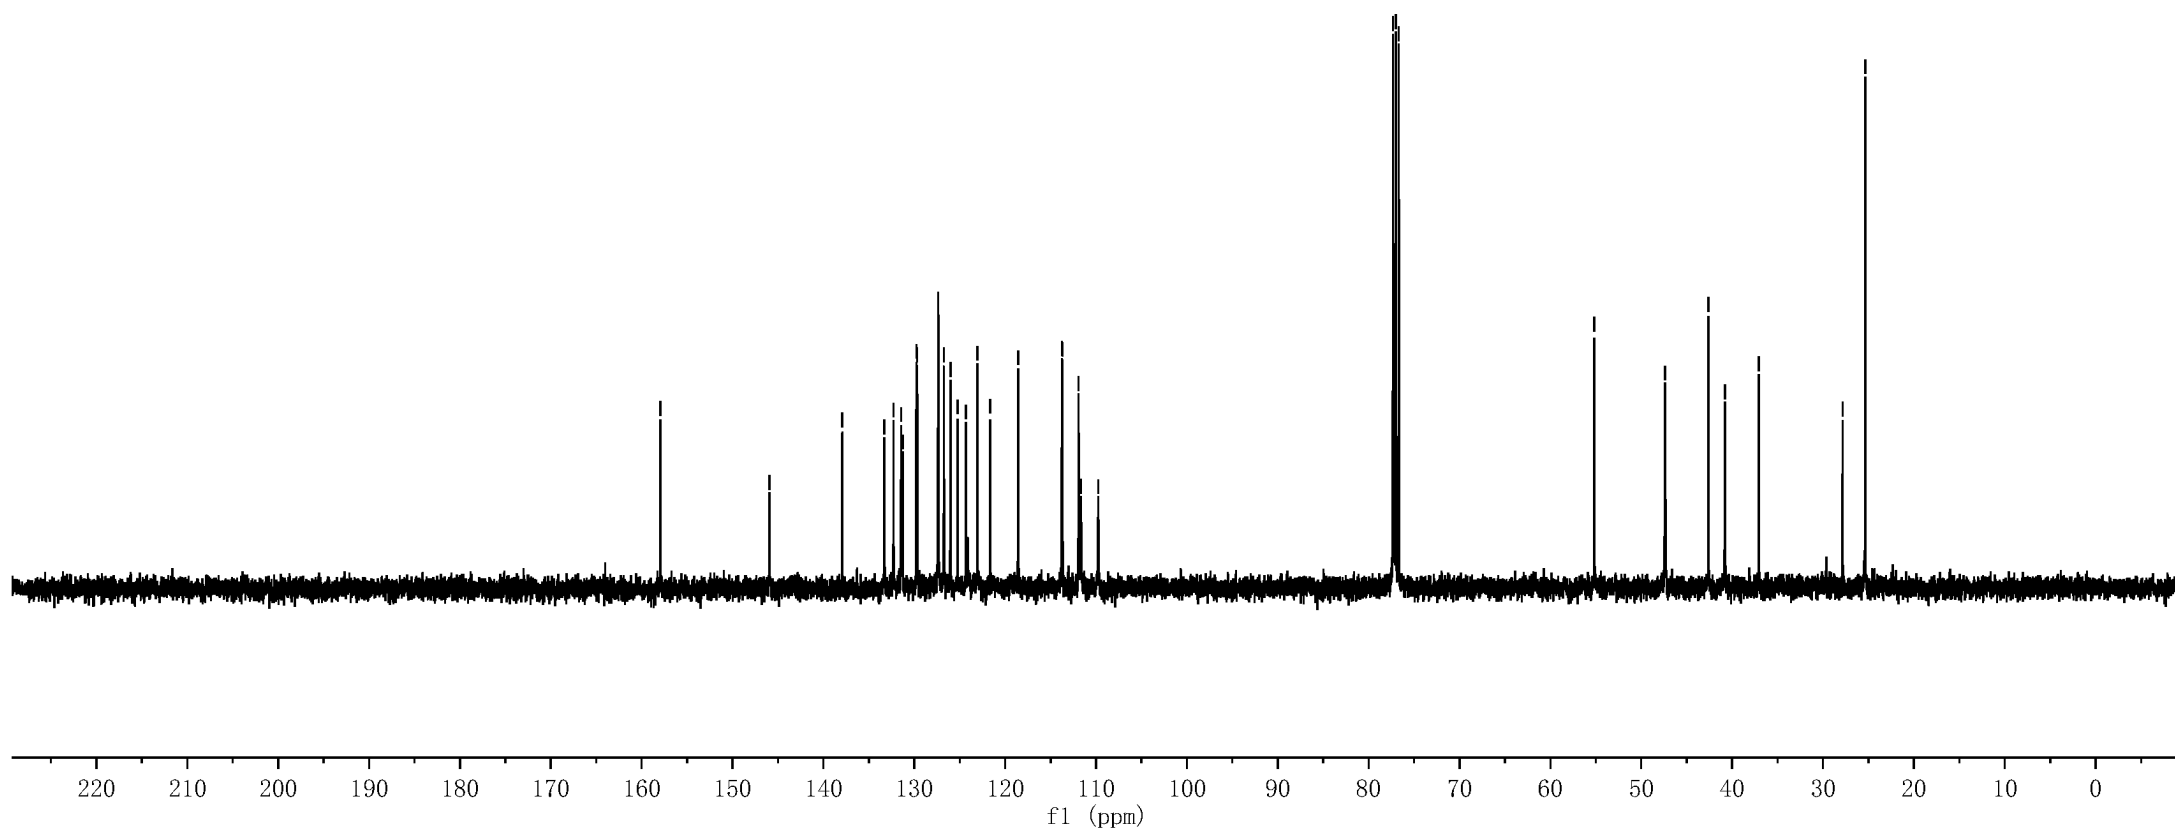

| Parameter                | Value               |
|--------------------------|---------------------|
| 1 Title                  | zyx-4-41-h          |
| 2 Origin                 | Bruker BioSpin GmbH |
| 3 Solvent                | CDCl3               |
| 4 Temperature            | 298.0               |
| 5 Number of Scans        | 12                  |
| 6 Acquisition Time       | 4.0894              |
| 7 Acquisition Date       | 2022-01-21T17:29:09 |
| 8 Spectrometer Frequency | 400.13              |
| 9 Spectral Width         | 8012.8              |

7.643  
7.626  
7.492  
7.465  
7.461  
7.308  
7.291  
7.275  
7.260  
7.211  
7.207  
7.191  
7.187  
6.804  
6.767  
6.747  
6.583  
6.579  
6.568  
6.373  
6.369  
6.352  
6.348  
6.296  
6.271  
6.248  
6.223  
6.109  
6.105  
6.088

3.230  
3.171  
3.160  
3.104  
2.556  
1.999  
1.928  
1.856

0.000

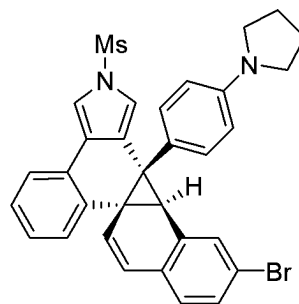

4s

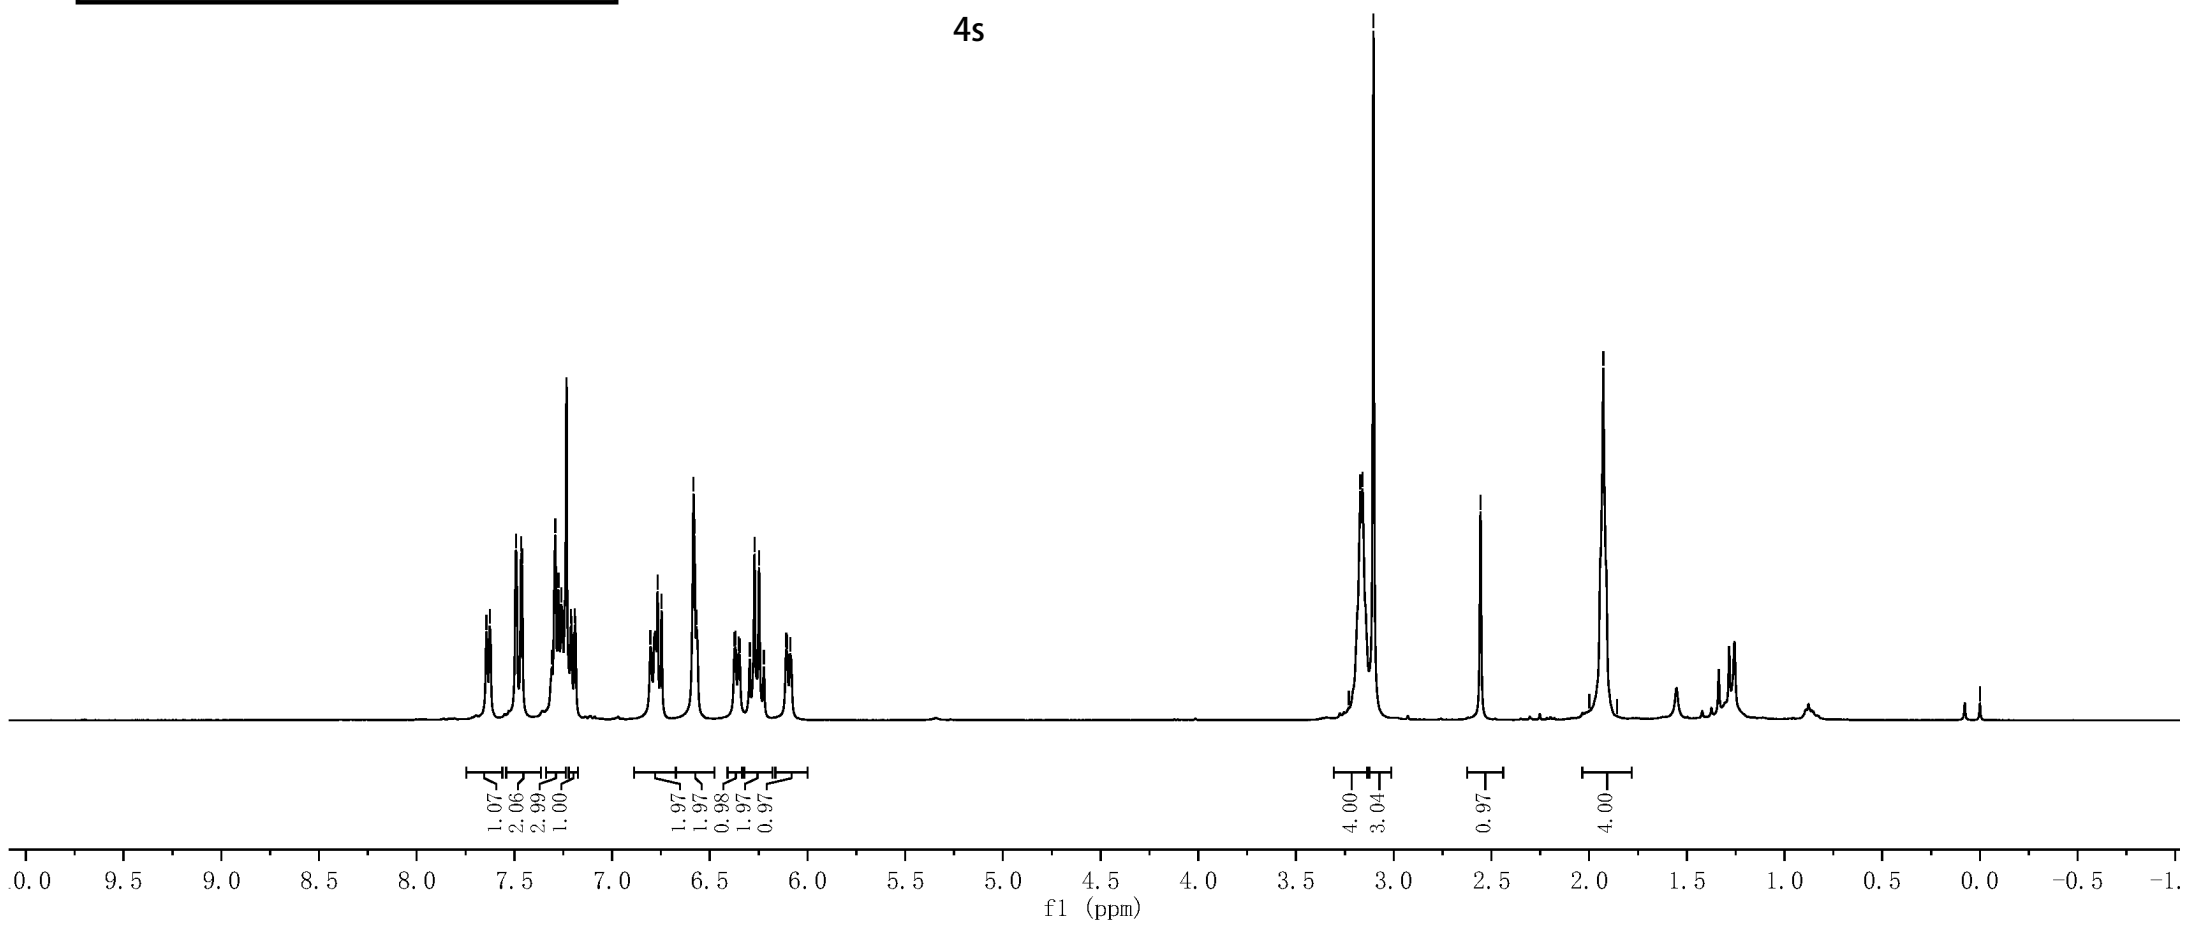

| Parameter                | Value               |
|--------------------------|---------------------|
| 1 Title                  | zyx-4-41-c          |
| 2 Origin                 | Bruker BioSpin GmbH |
| 3 Solvent                | CDCl3               |
| 4 Temperature            | 300.0               |
| 5 Number of Scans        | 40                  |
| 6 Acquisition Time       | 1.3631              |
| 7 Acquisition Date       | 2022-01-21T16:06:07 |
| 8 Spectrometer Frequency | 100.61              |
| 9 Spectral Width         | 24038.5             |



4s

146.12  
131.39  
131.30  
129.84  
129.02  
128.59  
127.46  
126.58  
126.46  
126.30  
123.14  
120.75  
118.86  
111.72  
109.81

77.32  
77.00  
76.68

47.36  
42.70  
41.07  
37.47

28.31  
25.37

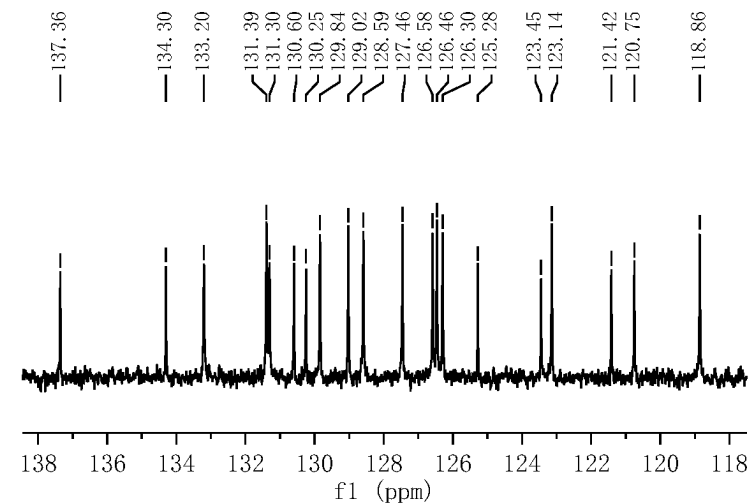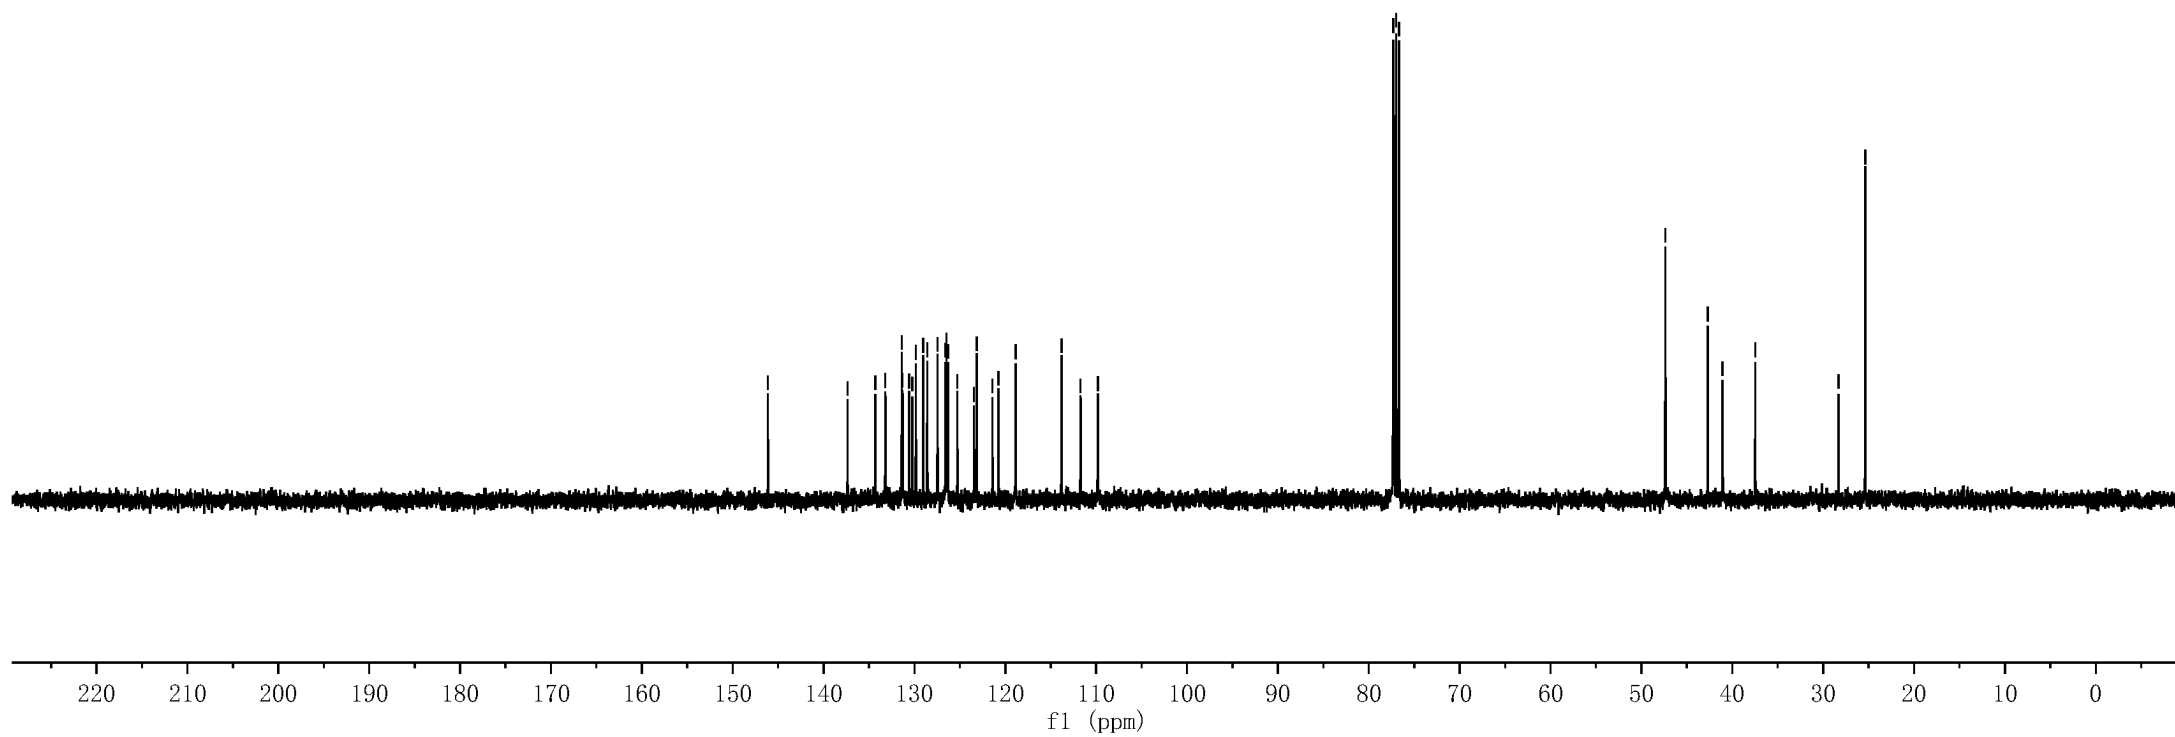

7.636  
7.633  
7.618  
7.614  
7.458  
7.452  
7.361  
7.358  
7.342  
7.339  
7.288  
7.266  
7.245  
7.204  
6.912  
6.906  
6.845  
6.836  
6.824  
6.815  
6.665  
6.658  
6.644  
6.637  
6.630  
6.624  
6.608  
6.603  
6.583  
6.577  
6.380  
6.374  
6.359  
6.352  
6.298  
6.274  
6.094  
6.077  
6.071

3.798

3.180  
3.164  
3.155  
3.138  
3.085

2.570

1.934  
1.918  
1.902

0.000

| Parameter                | Value               |
|--------------------------|---------------------|
| 1 Title                  | zyx-4-19-h          |
| 2 Origin                 | Bruker BioSpin GmbH |
| 3 Solvent                | CDCl3               |
| 4 Temperature            | 298.0               |
| 5 Number of Scans        | 15                  |
| 6 Acquisition Time       | 4.0894              |
| 7 Acquisition Date       | 2022-01-20T16:12:42 |
| 8 Spectrometer Frequency | 400.13              |
| 9 Spectral Width         | 8012.8              |

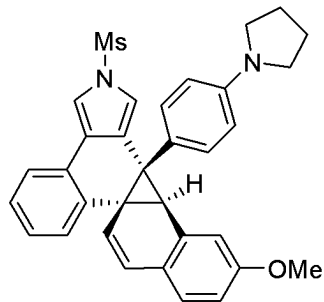

4t

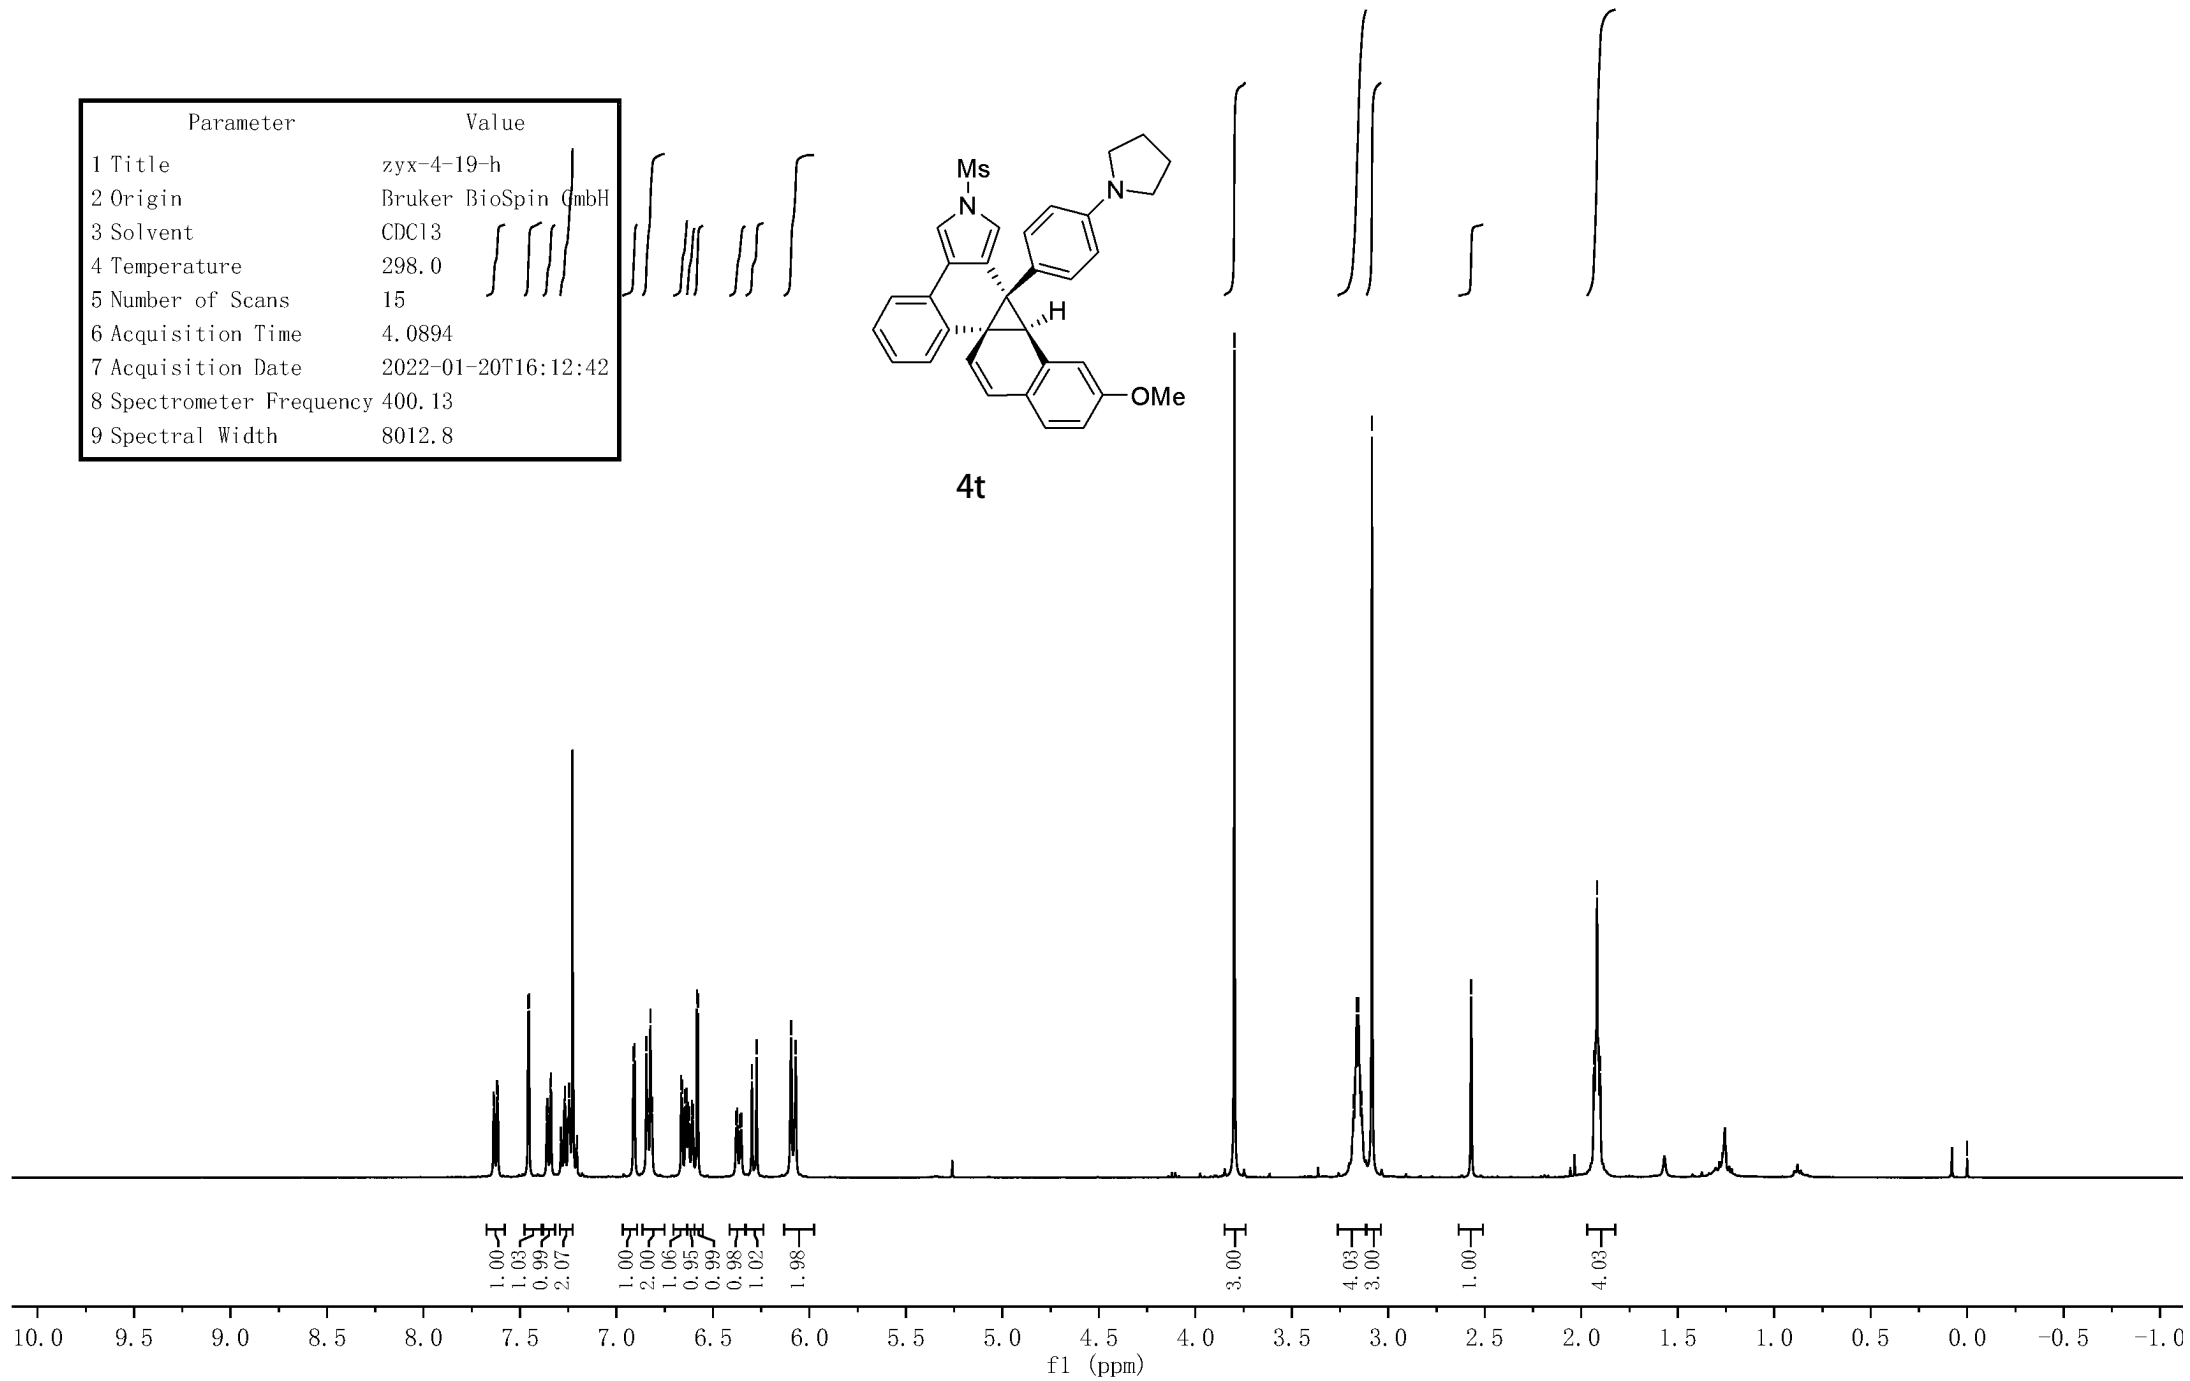

| Parameter                | Value               |
|--------------------------|---------------------|
| 1 Title                  | zyx-4-19---c        |
| 2 Origin                 | Bruker BioSpin GmbH |
| 3 Solvent                | CDCl3               |
| 4 Temperature            | 295.9               |
| 5 Number of Scans        | 58                  |
| 6 Acquisition Time       | 1.3631              |
| 7 Acquisition Date       | 2022-01-20T16:16:58 |
| 8 Spectrometer Frequency | 100.56              |
| 9 Spectral Width         | 24038.5             |

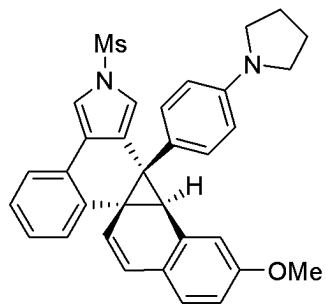

4t

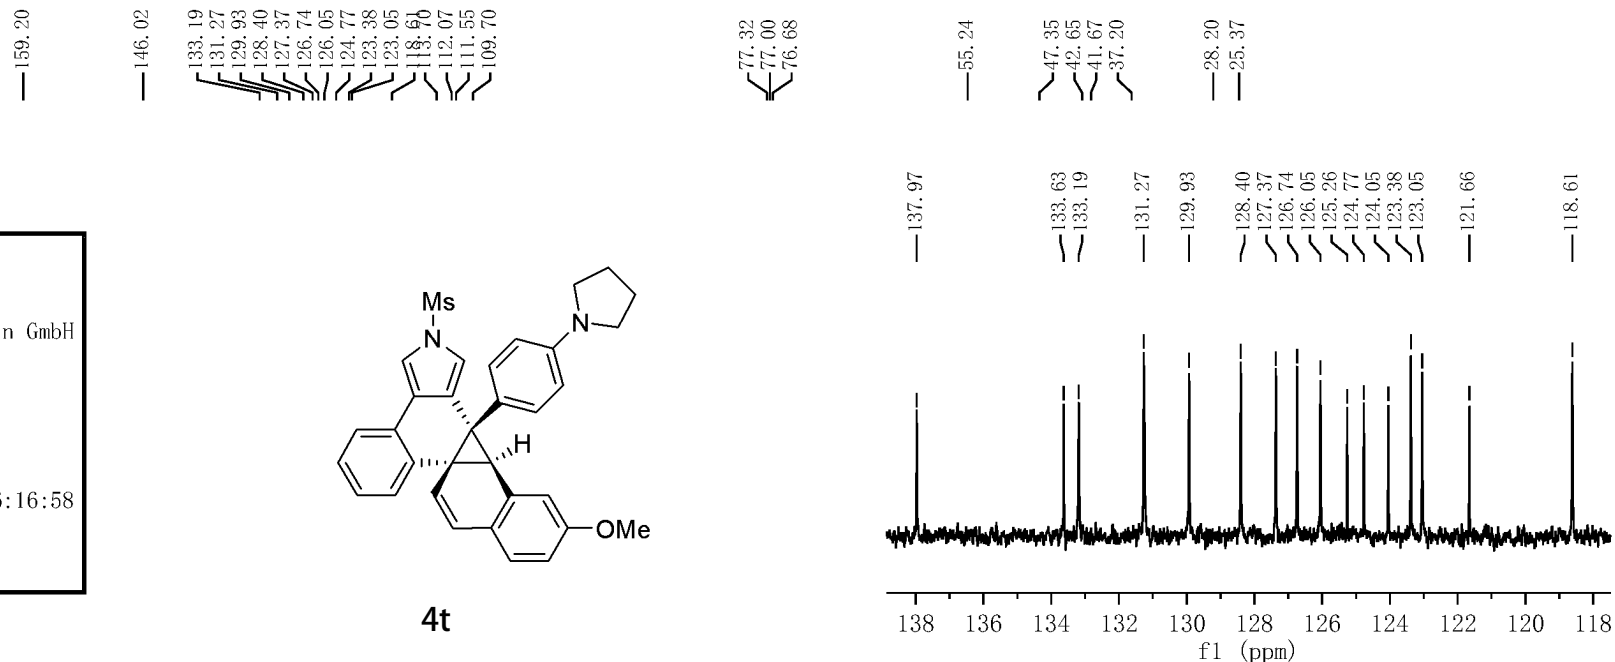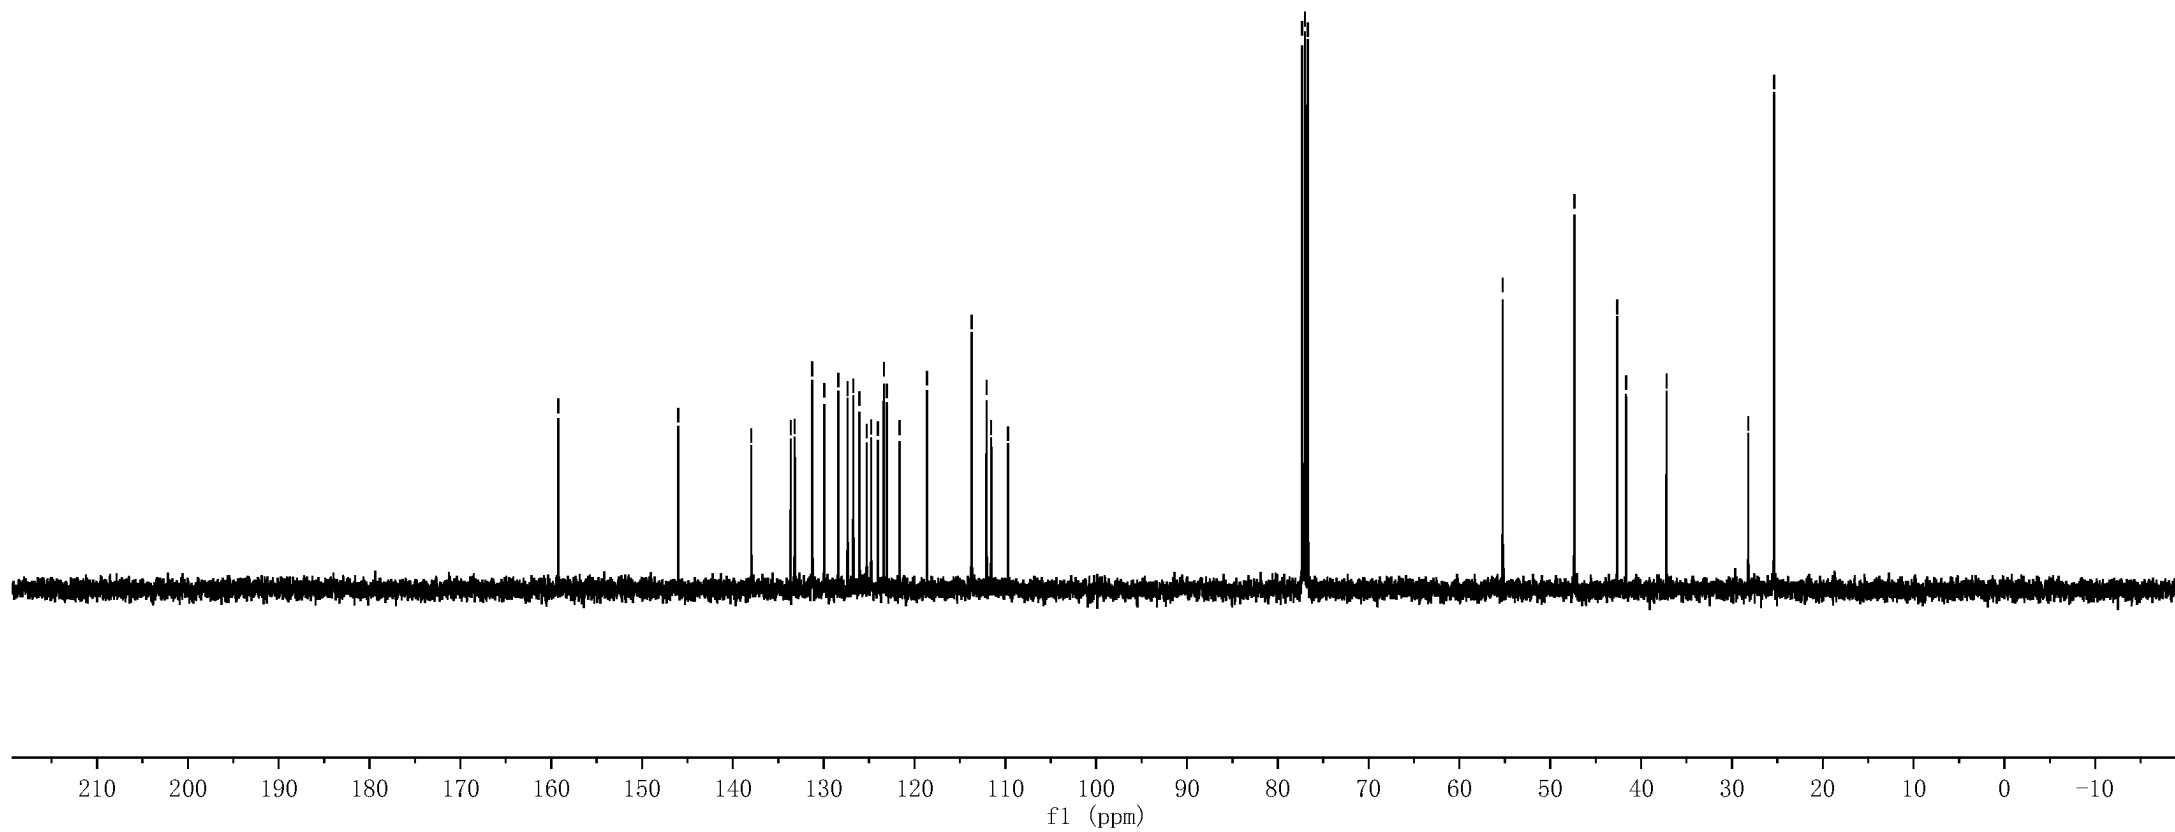

| Parameter                | Value               |
|--------------------------|---------------------|
| 1 Title                  | zyx-4-39            |
| 2 Origin                 | Bruker BioSpin GmbH |
| 3 Solvent                | CDC13               |
| 4 Temperature            | 298.0               |
| 5 Number of Scans        | 8                   |
| 6 Acquisition Time       | 4.0894              |
| 7 Acquisition Date       | 2022-01-20T17:40:38 |
| 8 Spectrometer Frequency | 400.13              |
| 9 Spectral Width         | 8012.8              |

7.654  
7.632  
7.608  
7.471  
7.466  
7.408  
7.362  
7.327  
7.287  
6.986  
6.966  
6.844  
6.827  
6.622  
6.592  
6.587  
6.391  
6.367  
6.246  
6.222  
6.054  
6.034

3.235  
3.153  
3.141  
3.087  
2.700  
1.978  
1.911  
1.852

0.000

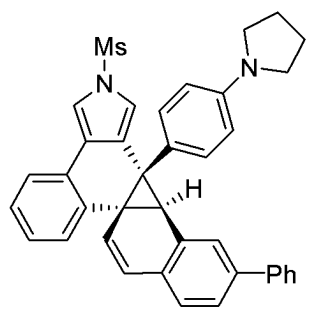

4u

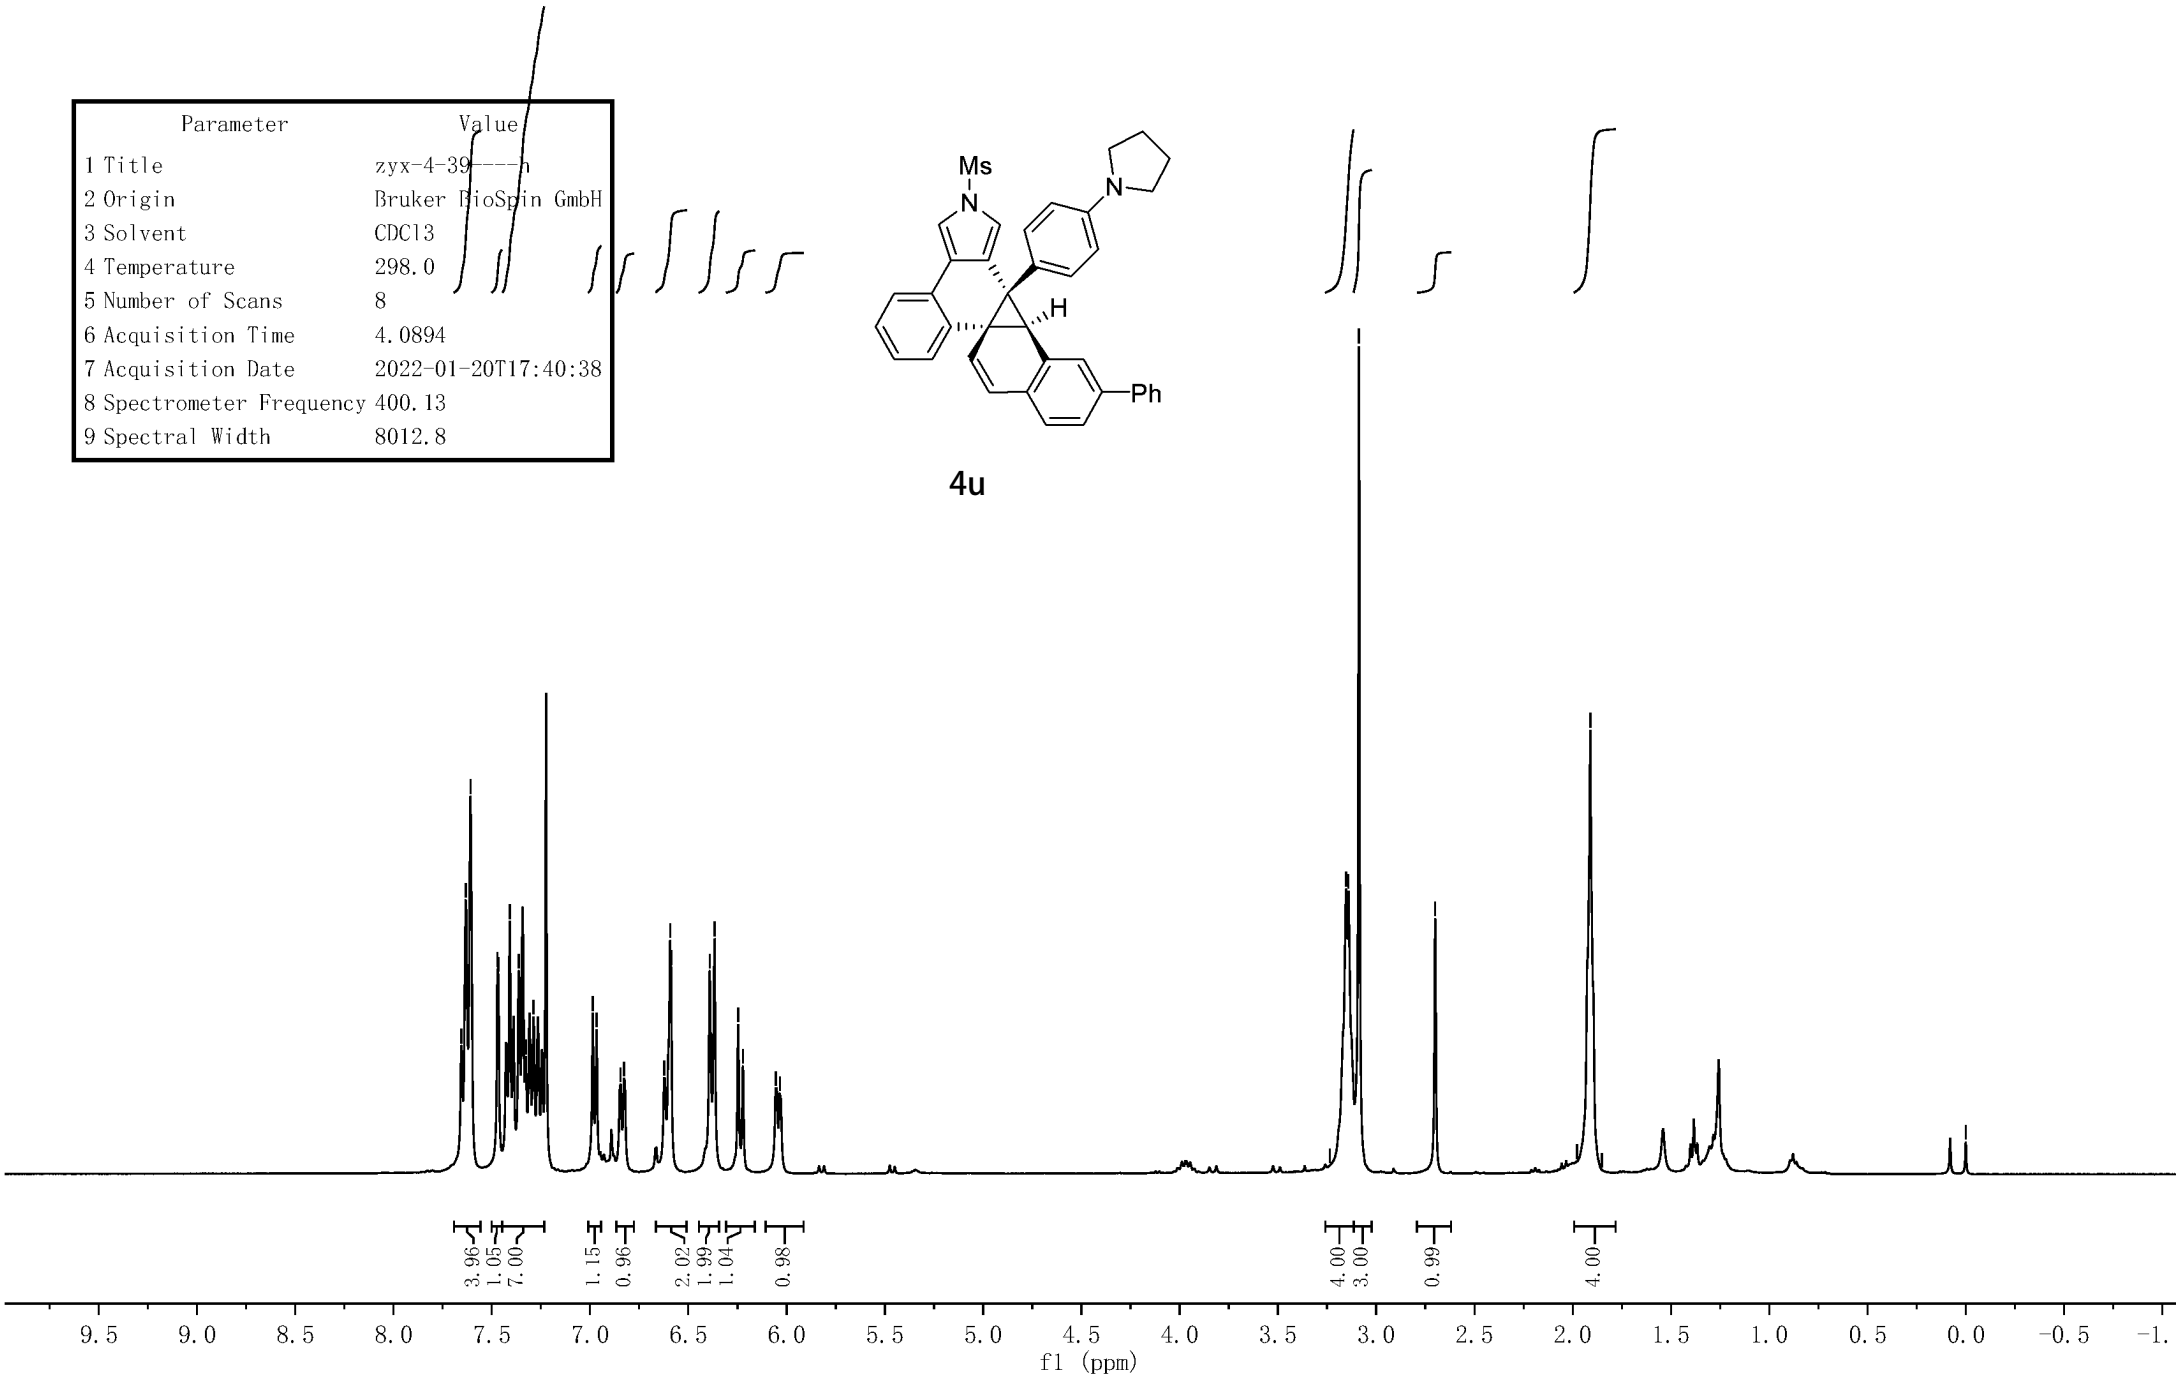

| Parameter                | Value               |
|--------------------------|---------------------|
| 1 Title                  | zyx-4-39---C        |
| 2 Origin                 | Bruker BioSpin GmbH |
| 3 Solvent                | CDCl3               |
| 4 Temperature            | 296.0               |
| 5 Number of Scans        | 53                  |
| 6 Acquisition Time       | 1.3631              |
| 7 Acquisition Date       | 2022-01-20T16:26:52 |
| 8 Spectrometer Frequency | 100.56              |
| 9 Spectral Width         | 24038.5             |

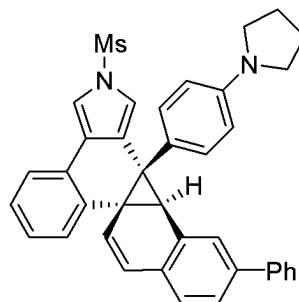

4u

146.04  
129.92  
128.71  
127.69  
127.44  
127.36  
127.17  
126.97  
126.85  
126.15  
124.79  
123.12  
118.76  
111.67  
109.78

77.32  
77.00  
76.68

47.35  
42.67  
41.68  
37.48

28.29  
25.37

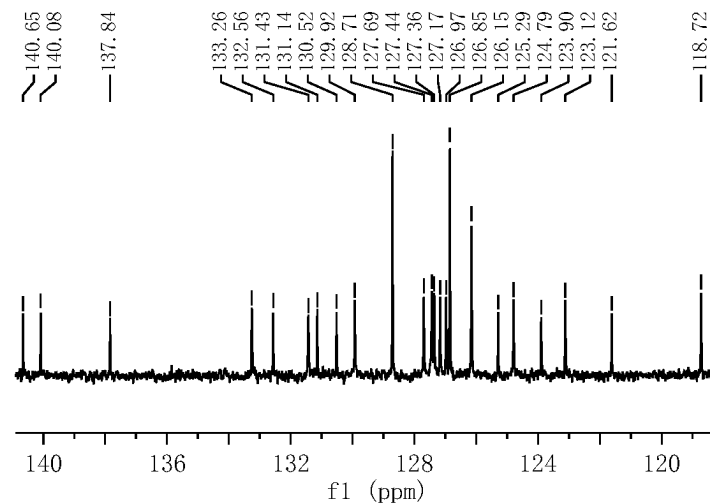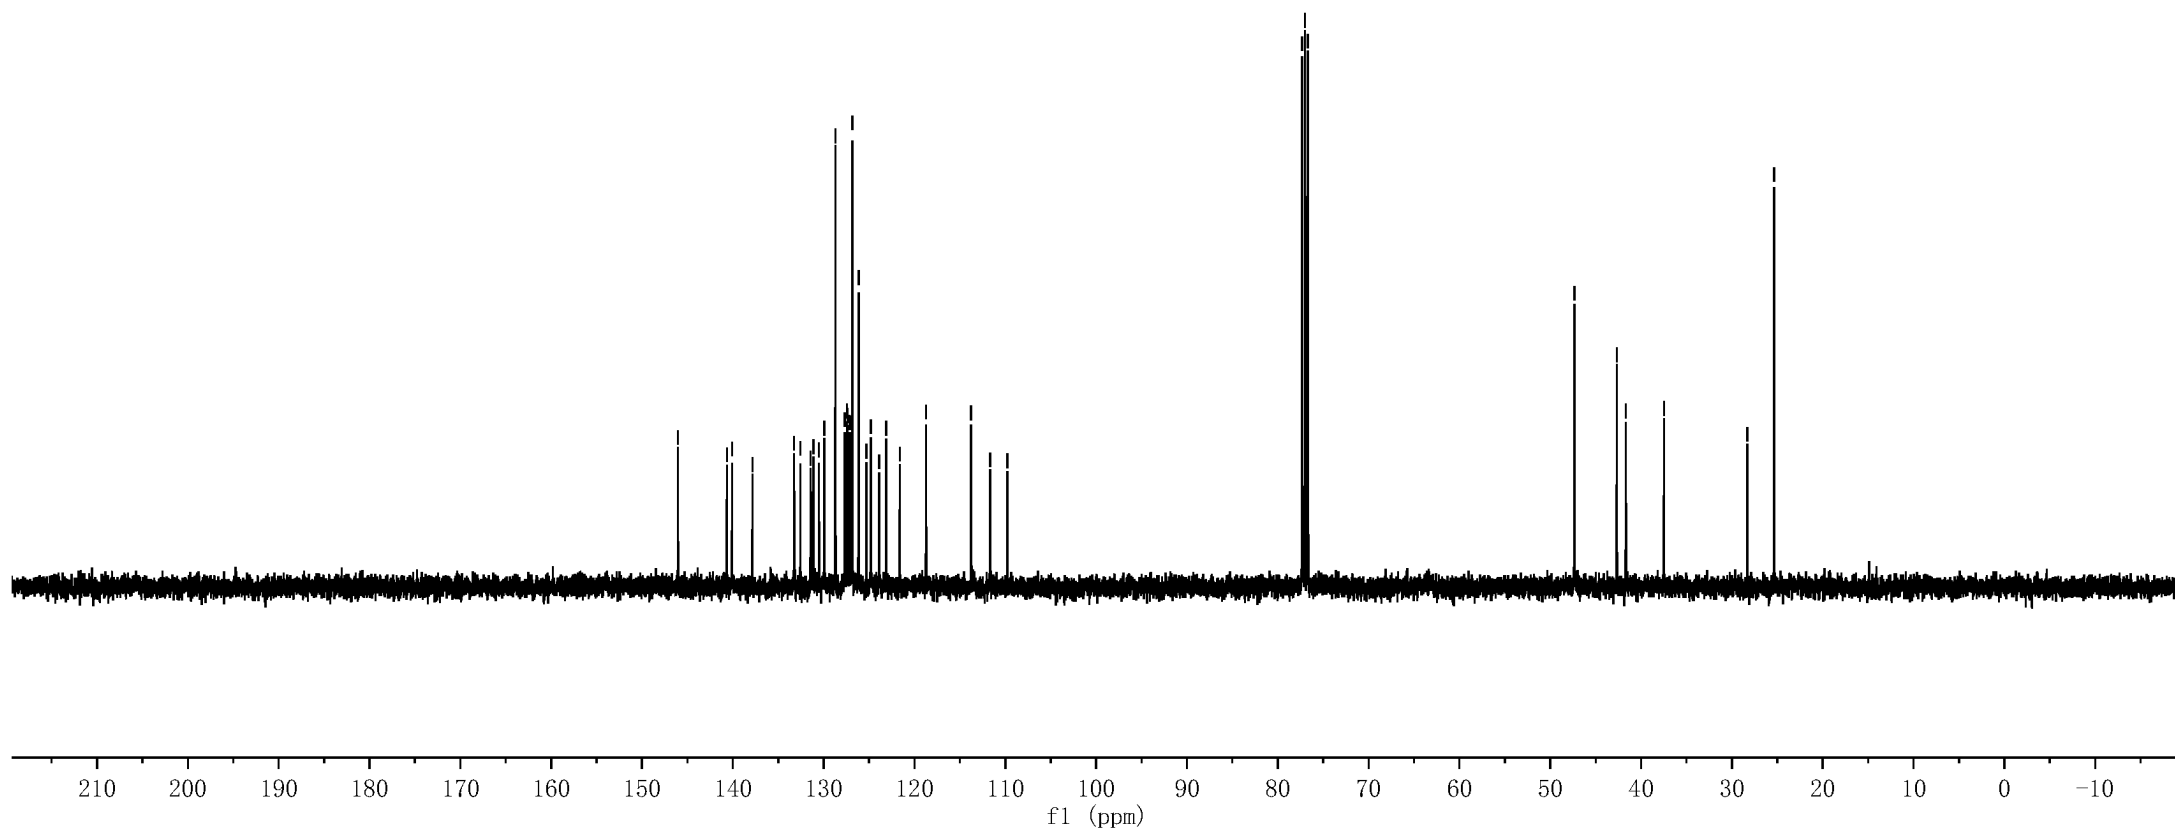



| Parameter                | Value               |
|--------------------------|---------------------|
| 1 Title                  | zyx-4-84---h        |
| 2 Origin                 | Bruker BioSpin GmbH |
| 3 Solvent                | CDCl3               |
| 4 Temperature            | 298.0               |
| 5 Number of Scans        | 6                   |
| 6 Acquisition Time       | 4.0894              |
| 7 Acquisition Date       | 2022-02-23T15:59:42 |
| 8 Spectrometer Frequency | 400.13              |
| 9 Spectral Width         | 8012.8              |

7.658  
7.640  
7.636  
7.467  
7.461  
7.372  
7.353  
7.300  
7.285  
7.263  
7.093  
7.075  
7.009  
6.990  
6.972  
6.856  
6.837  
6.766  
6.748  
6.606  
6.600  
6.491  
6.471  
6.375  
6.354  
6.342  
6.317  
6.206  
6.182  
6.084  
6.063

3.225  
3.160  
3.154  
3.090  
2.583  
2.395  
1.937  
1.921  
1.905  
0.000

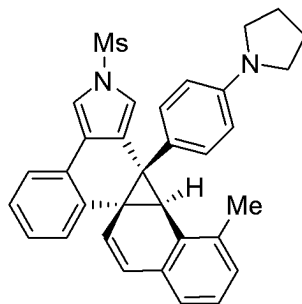

4v

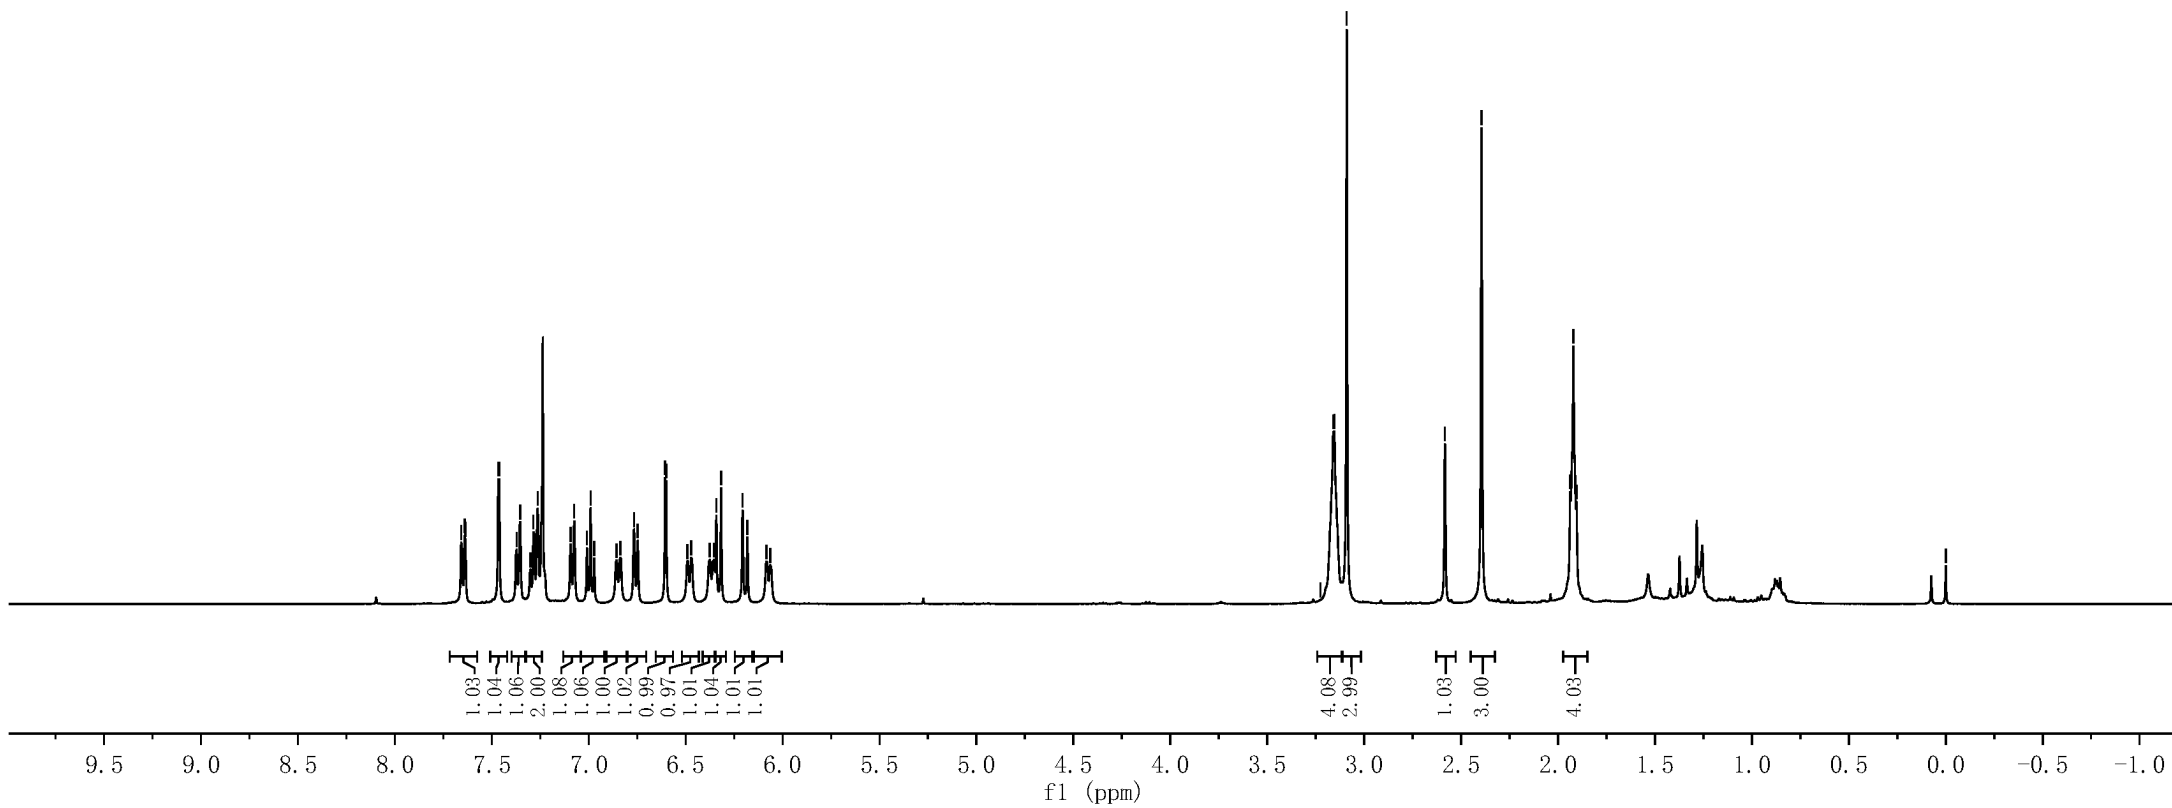

| Parameter                | Value               |
|--------------------------|---------------------|
| 1 Title                  | zyx-4-84---c        |
| 2 Origin                 | Bruker BioSpin GmbH |
| 3 Solvent                | CDCl3               |
| 4 Temperature            | 300.0               |
| 5 Number of Scans        | 69                  |
| 6 Acquisition Time       | 1.3631              |
| 7 Acquisition Date       | 2022-02-23T16:01:10 |
| 8 Spectrometer Frequency | 100.61              |
| 9 Spectral Width         | 24038.5             |

146.08  
138.40  
136.13  
133.19  
131.53  
131.15  
131.04  
130.77  
129.93  
129.14  
128.01  
127.41  
126.11  
125.70  
125.53  
125.49  
125.33  
124.21  
123.08  
121.76  
118.56  
113.80  
111.54  
109.80

77.32  
77.00  
76.68

47.37  
42.63  
38.93  
37.11

27.06  
25.39  
19.72

133.19  
131.53  
131.15  
131.04  
130.77  
129.93  
129.14  
128.01  
127.41  
126.11  
125.70  
125.53  
125.49  
125.33  
124.21  
123.08  
121.76  
118.56

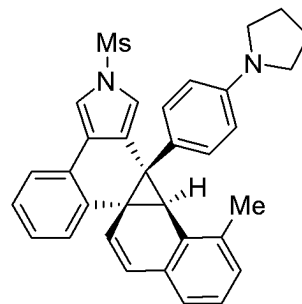

4v

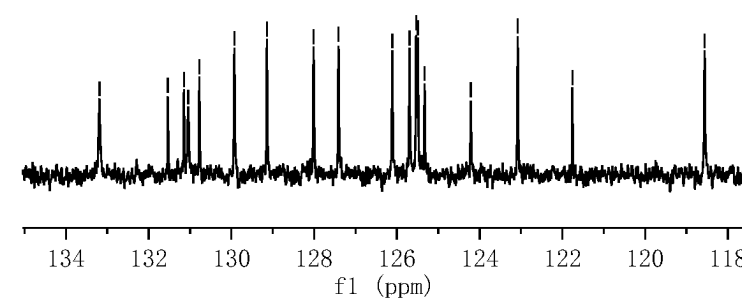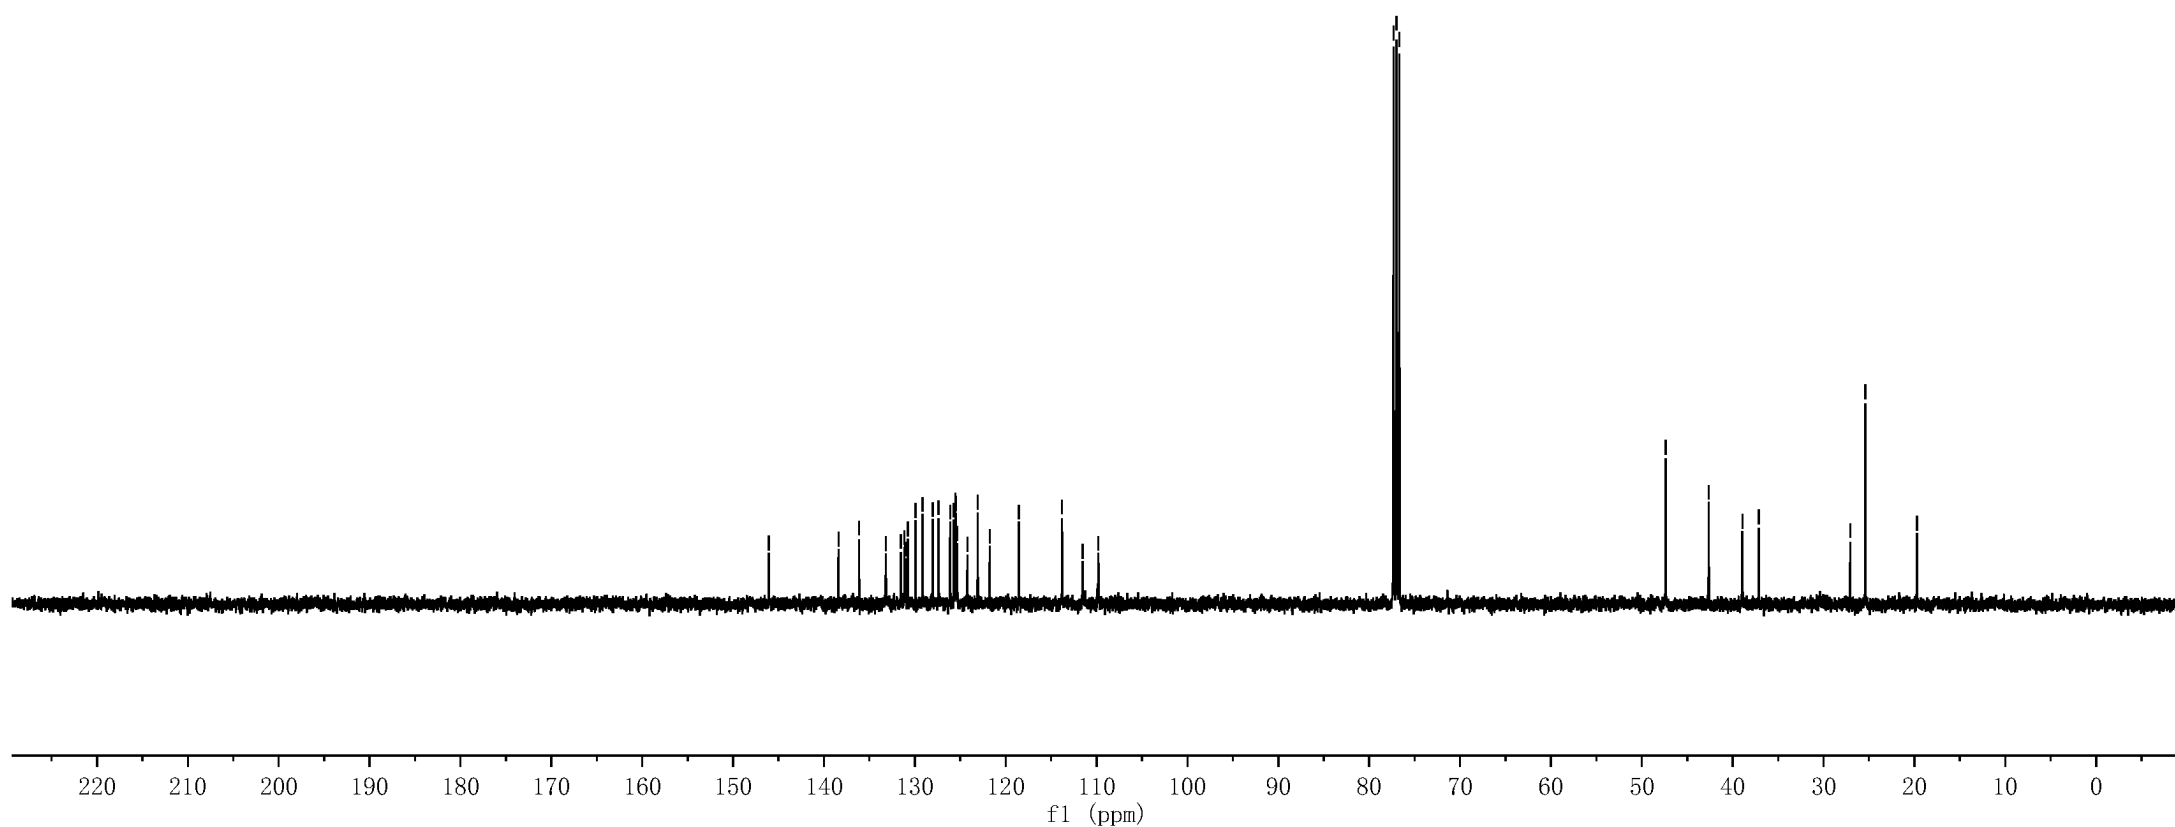

| Parameter                | Value               |
|--------------------------|---------------------|
| 1 Title                  | zyx-4-53---h        |
| 2 Origin                 | Bruker BioSpin GmbH |
| 3 Solvent                | CDC13               |
| 4 Temperature            | 298.0               |
| 5 Number of Scans        | 7                   |
| 6 Acquisition Time       | 4.0894              |
| 7 Acquisition Date       | 2022-02-21T16:15:16 |
| 8 Spectrometer Frequency | 400.13              |
| 9 Spectral Width         | 8012.8              |

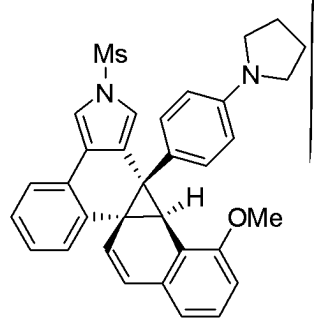

4w

7.646  
7.631  
7.627  
7.461  
7.455  
7.331  
7.309  
7.284  
7.228  
7.224  
7.210  
7.076  
7.056  
7.036  
6.852  
6.848  
6.831  
6.827  
6.809  
6.789  
6.616  
6.582  
6.565  
6.546  
6.385  
6.366  
6.343  
6.318  
6.245  
6.220  
6.113  
6.092

3.839

3.239  
3.173  
3.166  
3.103  
2.894

1.946  
1.930  
1.914

0.000

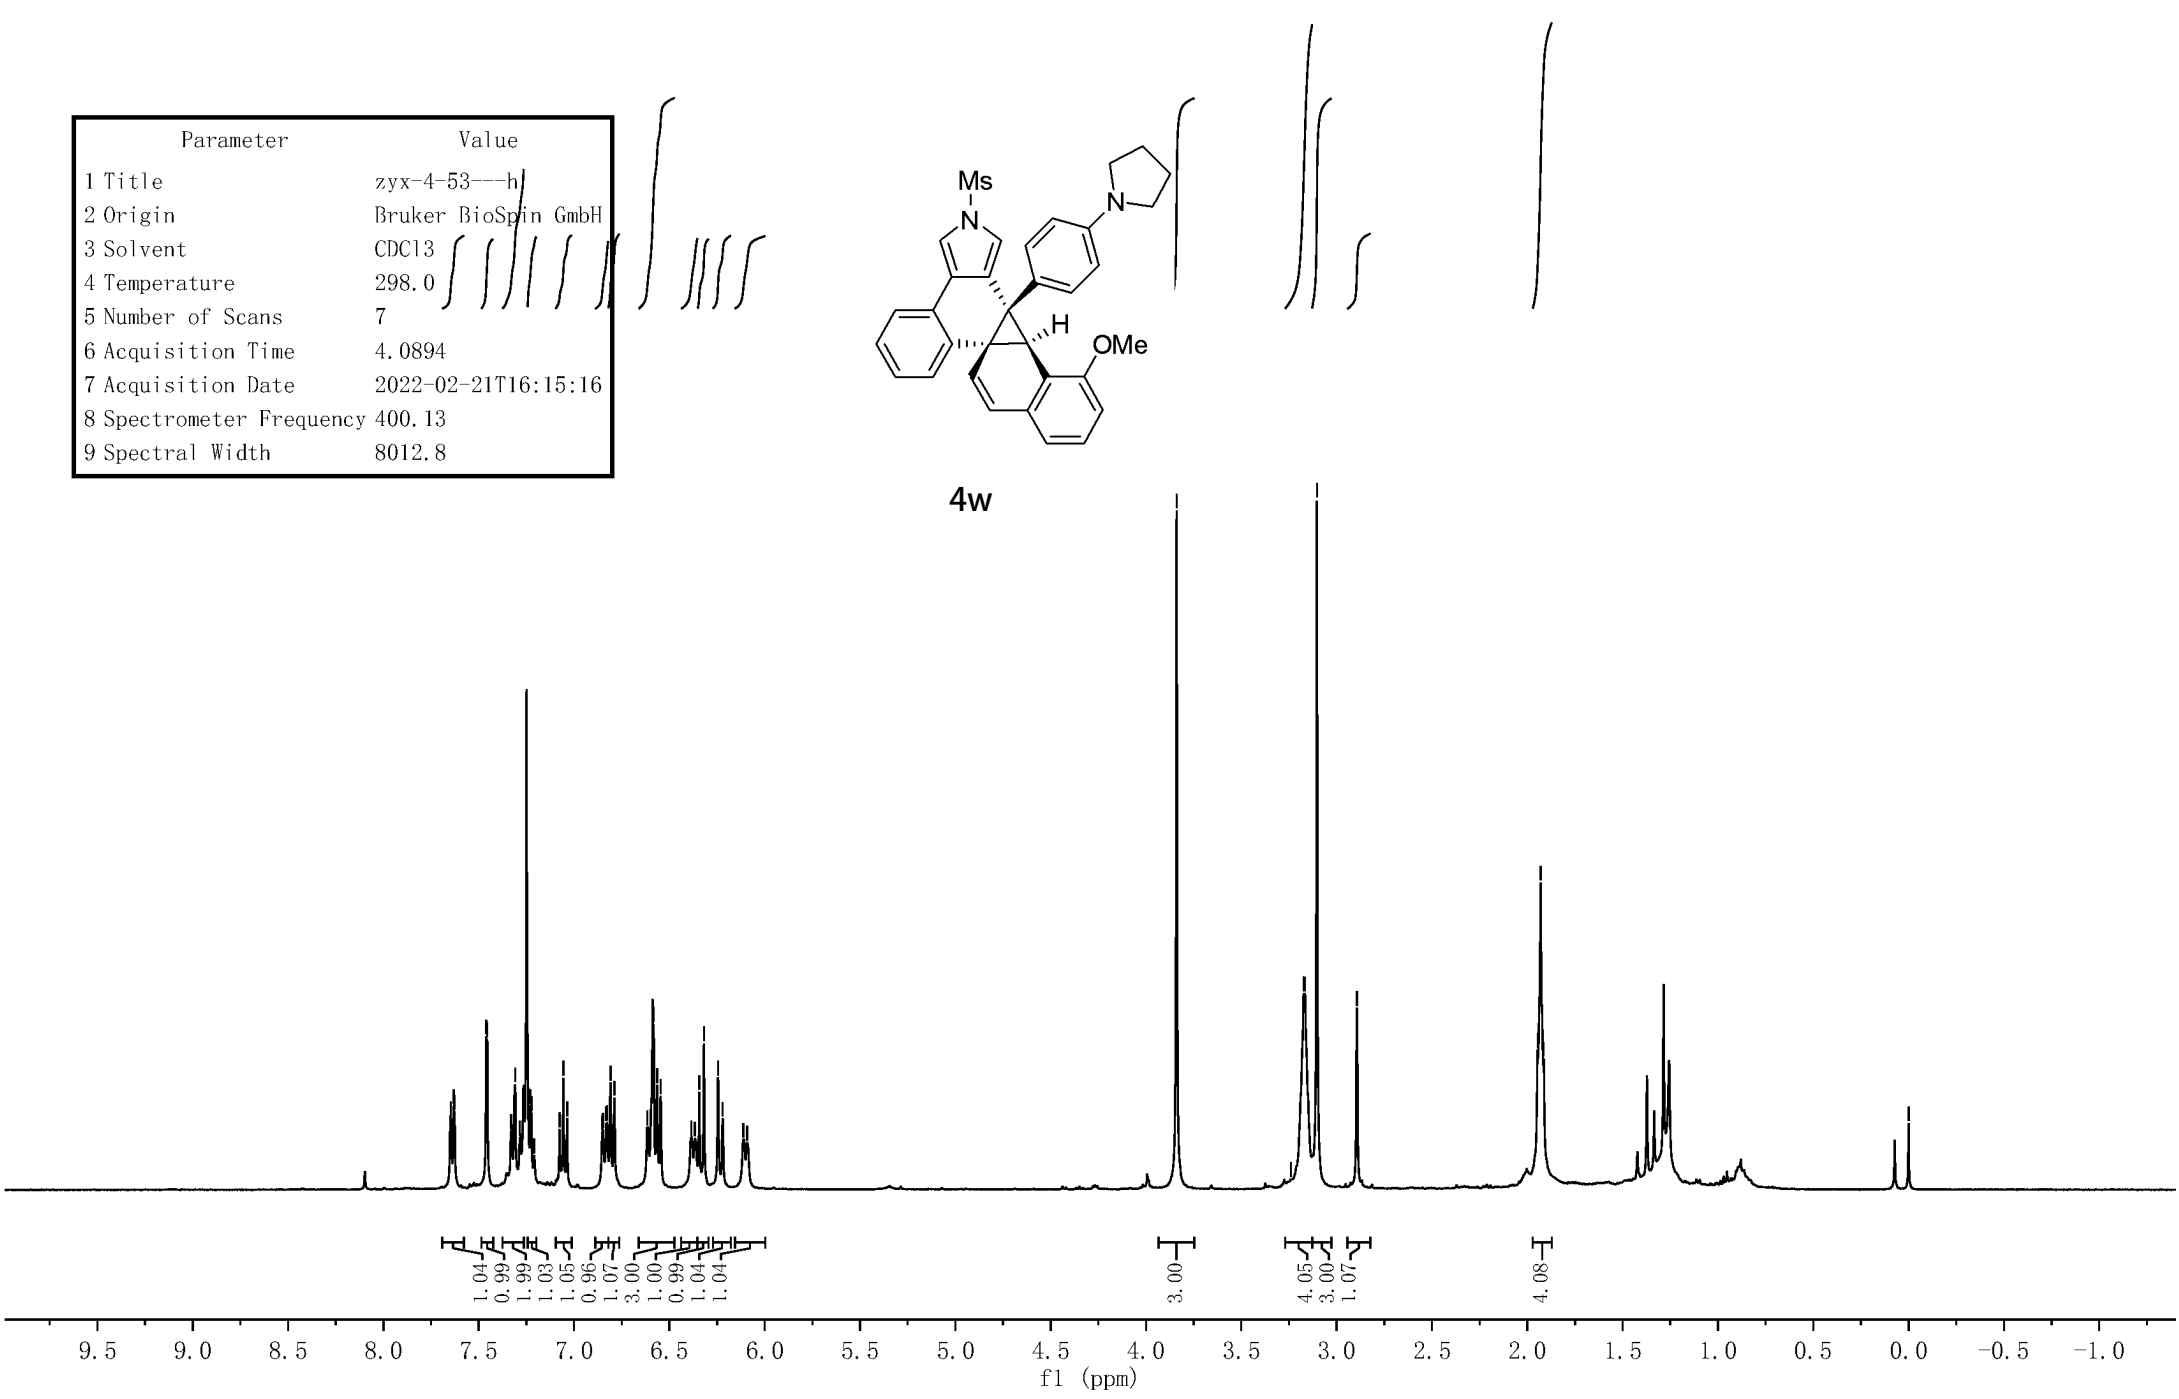

| Parameter                | Value               |
|--------------------------|---------------------|
| 1 Title                  | zyx-4---53-c        |
| 2 Origin                 | Bruker BioSpin GmbH |
| 3 Solvent                | CDCl3               |
| 4 Temperature            | 300.0               |
| 5 Number of Scans        | 130                 |
| 6 Acquisition Time       | 1.3631              |
| 7 Acquisition Date       | 2022-02-23T16:09:27 |
| 8 Spectrometer Frequency | 100.61              |
| 9 Spectral Width         | 24038.5             |

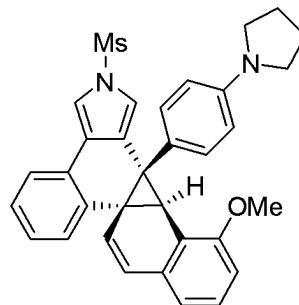

4w

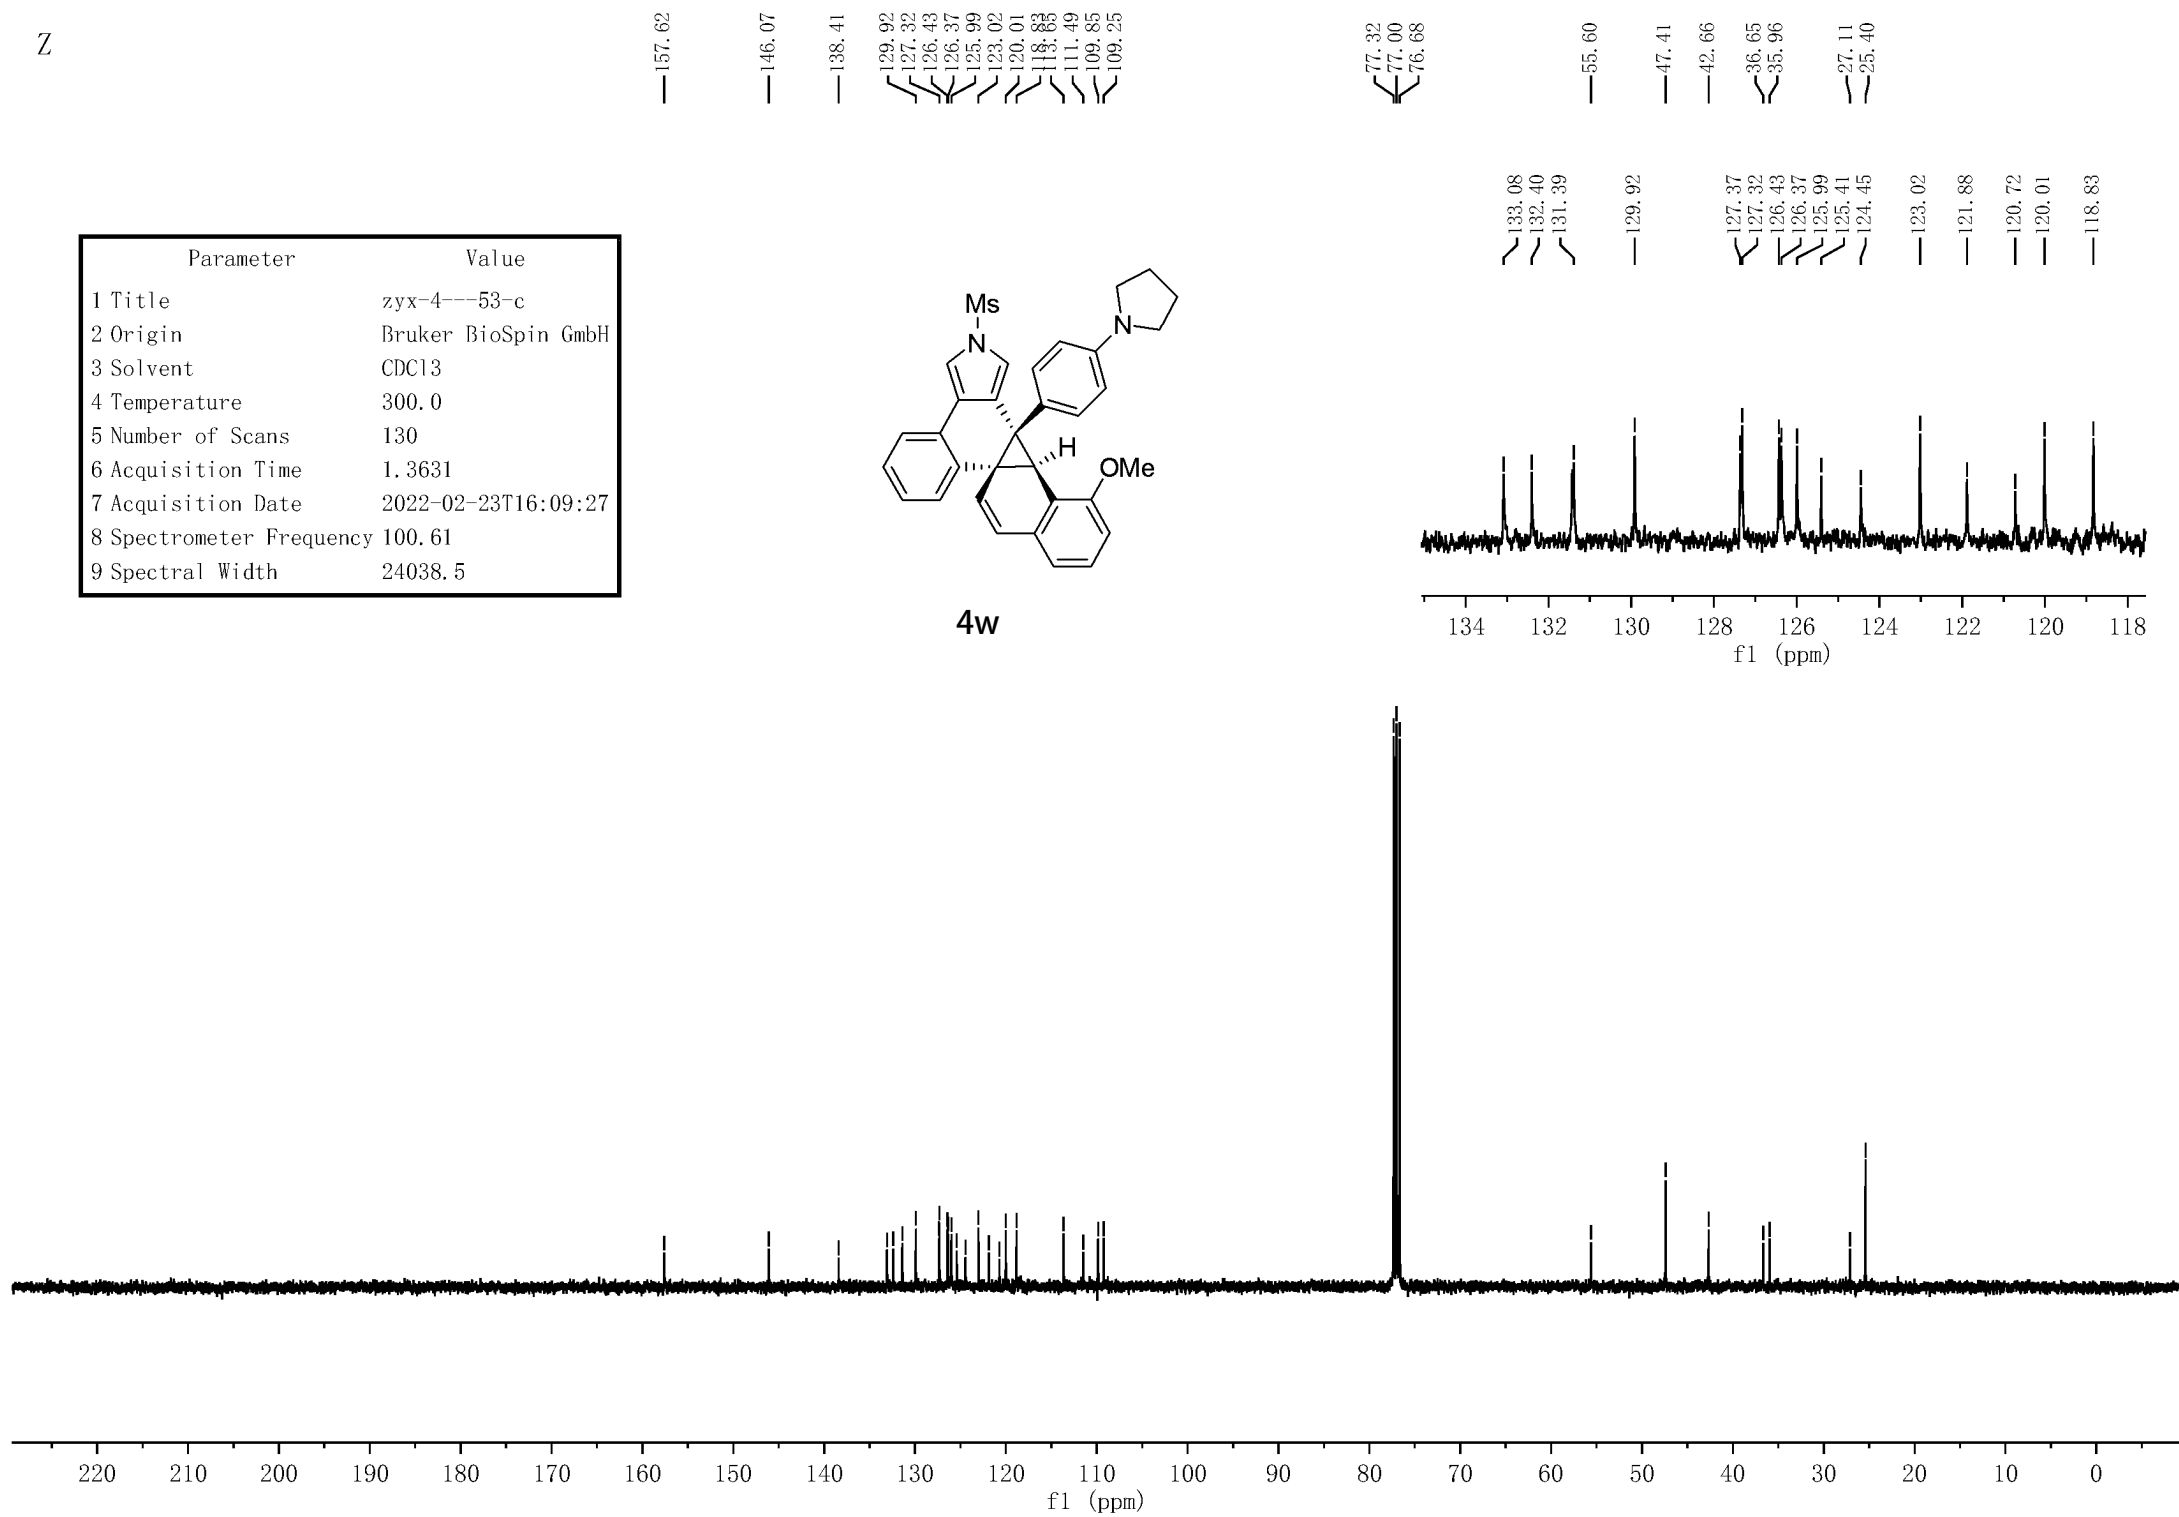

7.715  
7.697  
7.531  
7.526  
7.420  
7.402  
7.391  
7.322  
7.303  
7.292  
7.181  
7.162  
7.144  
6.978  
6.959  
6.925  
6.900  
6.634  
6.616  
6.595  
6.410  
6.385  
6.291  
6.277  
6.268

3.150  
2.890  
2.696

0.000

| Parameter                | Value               |
|--------------------------|---------------------|
| 1 Title                  | ZYX-3-165-H         |
| 2 Origin                 | Bruker BioSpin GmbH |
| 3 Solvent                | CDCl3               |
| 4 Temperature            | 298.0               |
| 5 Number of Scans        | 14                  |
| 6 Acquisition Time       | 4.0894              |
| 7 Acquisition Date       | 2021-12-10T17:06:07 |
| 8 Spectrometer Frequency | 400.13              |
| 9 Spectral Width         | 8012.8              |

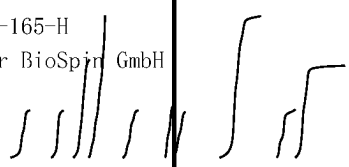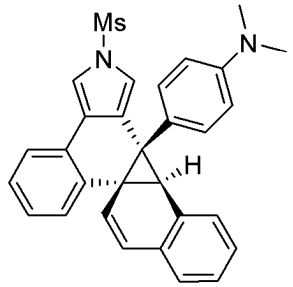

4x

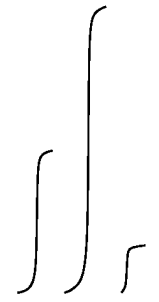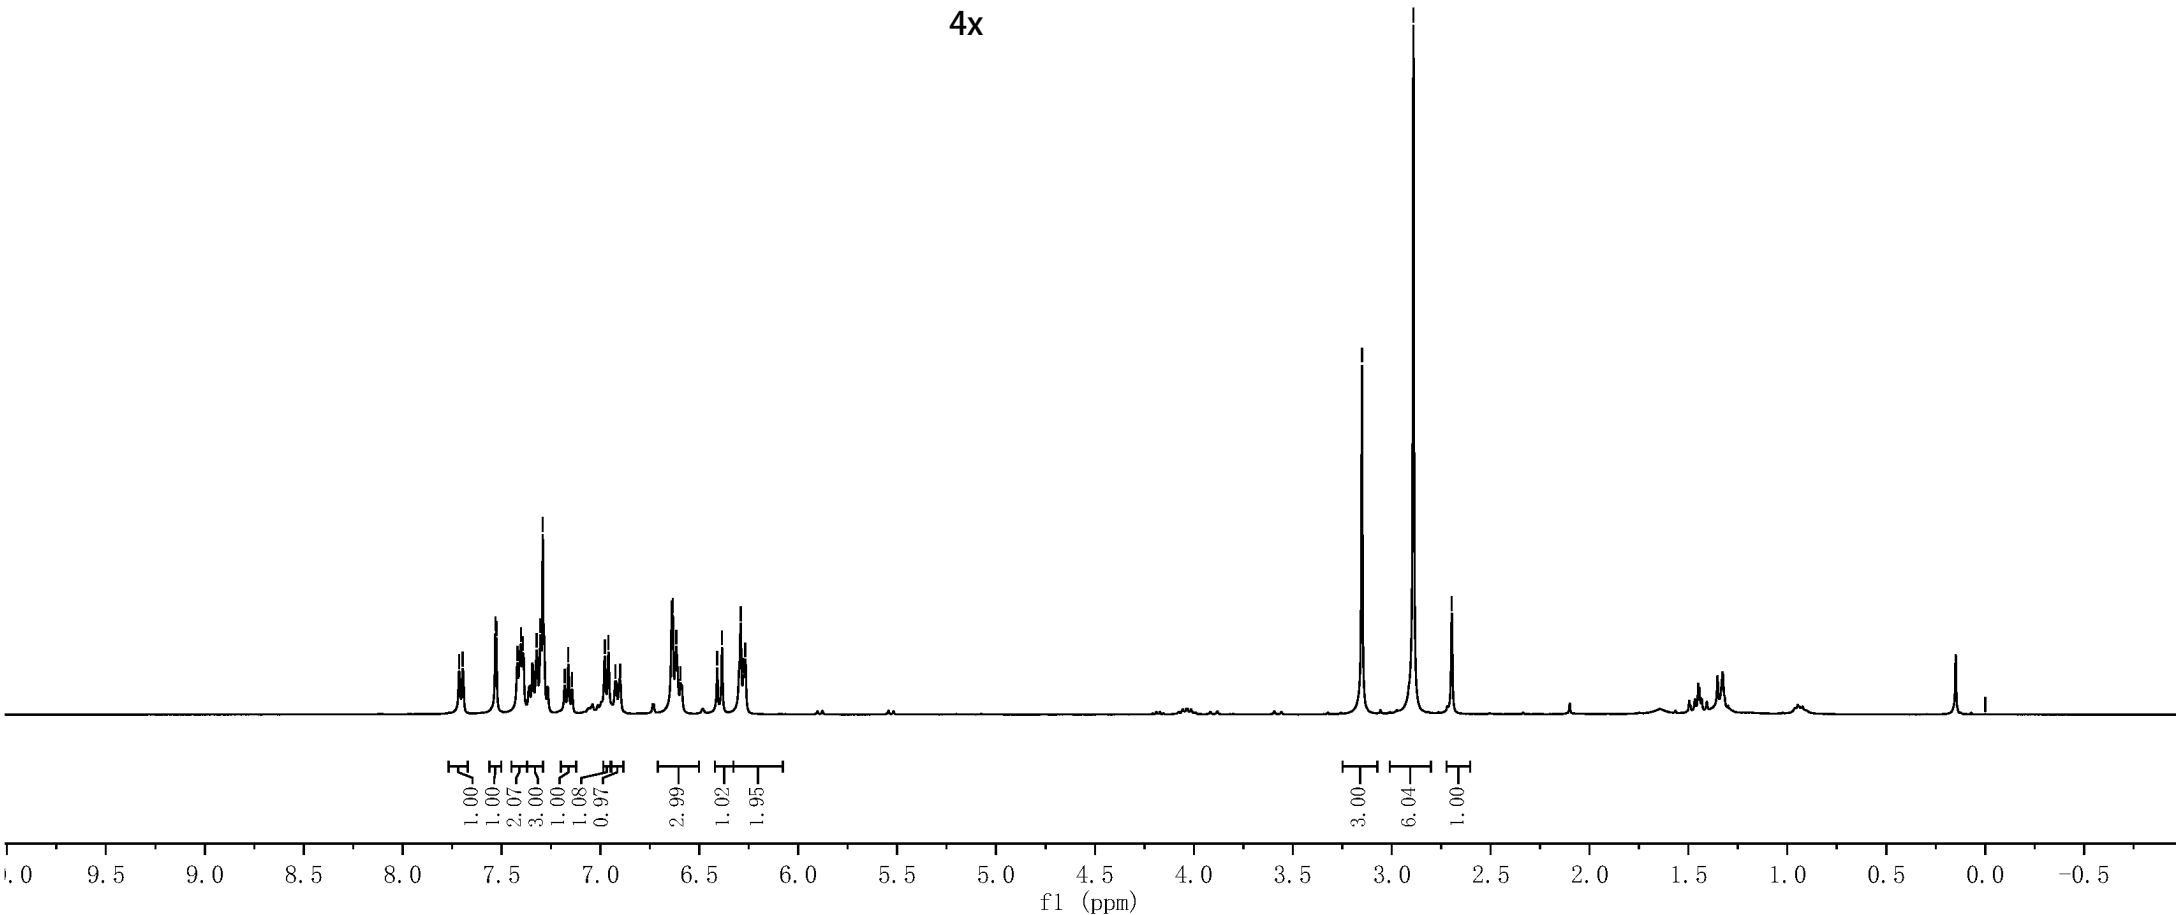

| Parameter                | Value               |
|--------------------------|---------------------|
| 1 Title                  | ZYX-3-165-C         |
| 2 Origin                 | Bruker BioSpin GmbH |
| 3 Solvent                | CDCl3               |
| 4 Temperature            | 300.0               |
| 5 Number of Scans        | 60                  |
| 6 Acquisition Time       | 1.3631              |
| 7 Acquisition Date       | 2021-12-10T17:07:39 |
| 8 Spectrometer Frequency | 100.61              |
| 9 Spectral Width         | 24038.5             |

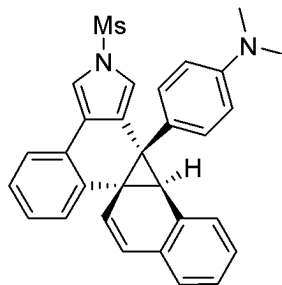

4x

148.61  
131.98  
131.29  
130.96  
129.92  
128.89  
127.48  
127.42  
127.30  
126.12  
126.08  
125.88  
123.09  
118.78  
112.47  
110.53

77.32  
77.00  
76.68

42.66  
41.41  
40.33  
37.24

27.81

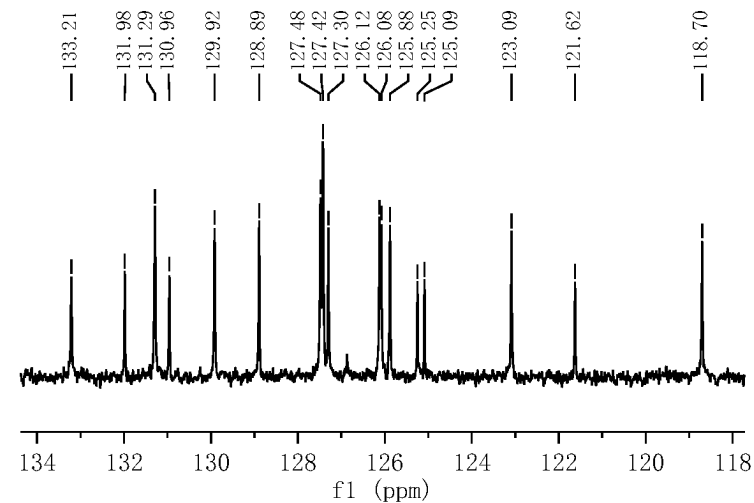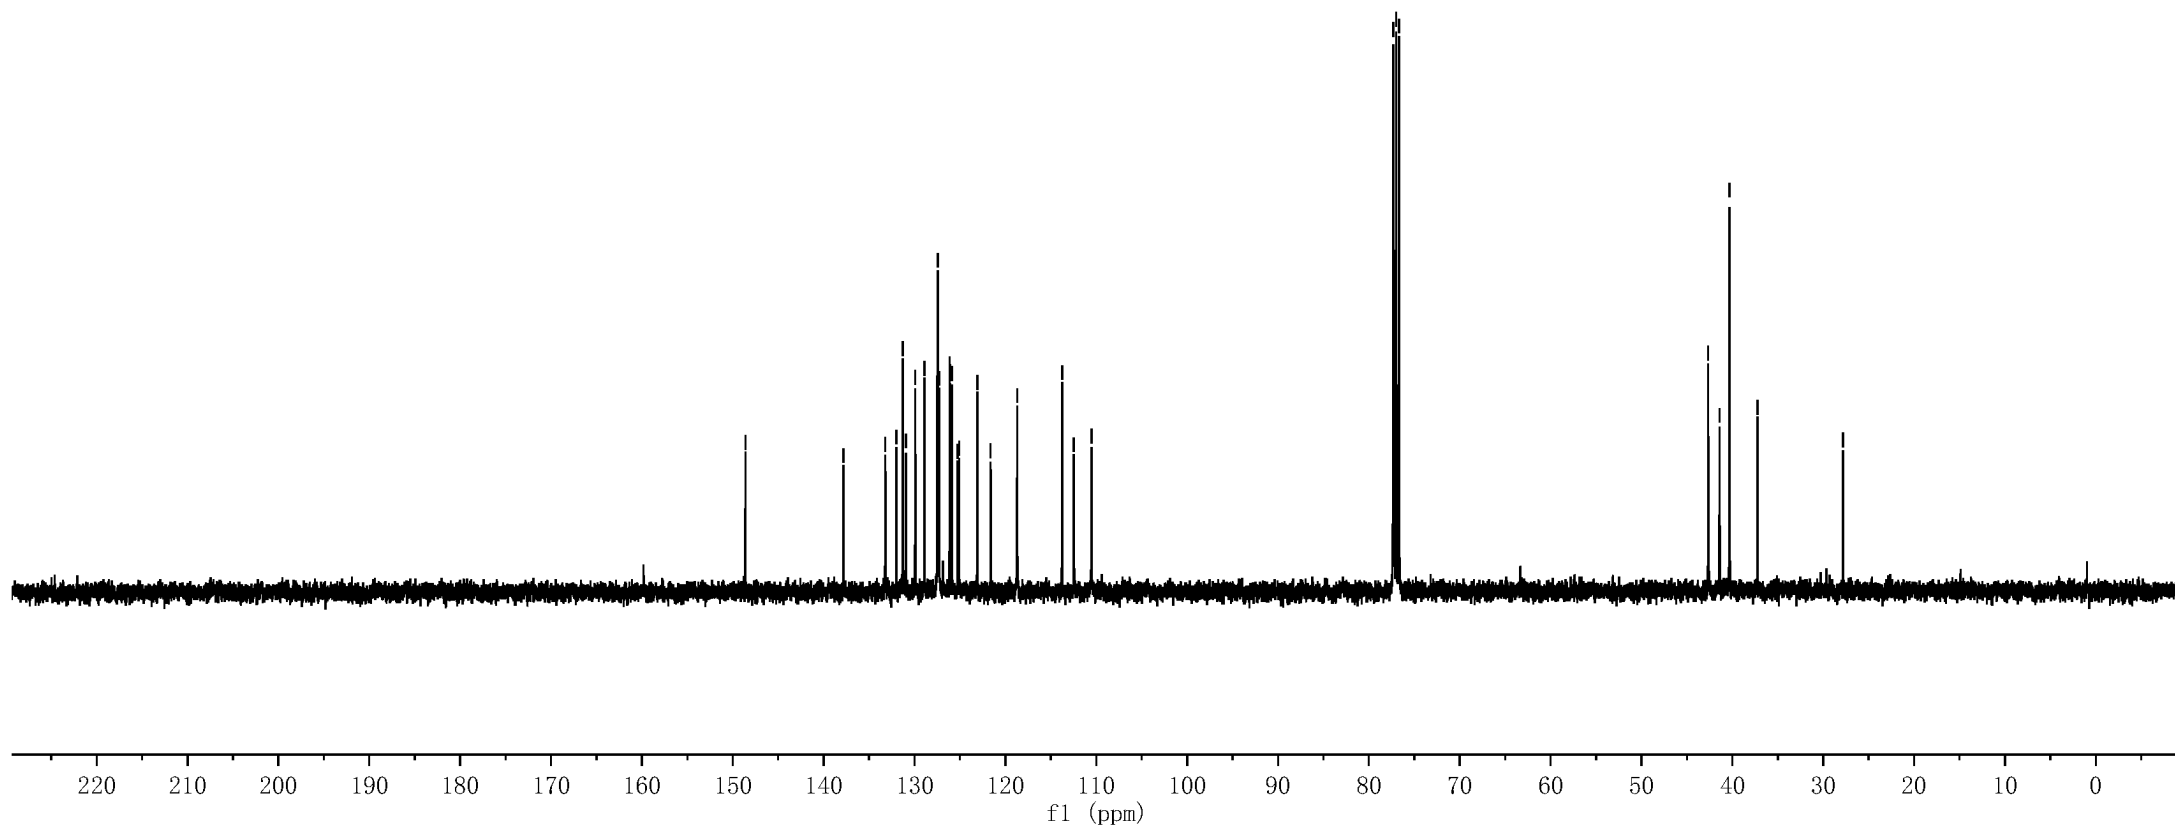

| Parameter                | Value               |
|--------------------------|---------------------|
| 1 Title                  | zyx-3-200-h         |
| 2 Origin                 | Bruker BioSpin GmbH |
| 3 Solvent                | CDCl3               |
| 4 Temperature            | 298.0               |
| 5 Number of Scans        | 13                  |
| 6 Acquisition Time       | 4.0894              |
| 7 Acquisition Date       | 2021-12-20T16:33:20 |
| 8 Spectrometer Frequency | 400.13              |
| 9 Spectral Width         | 8012.8              |

7.621  
7.603  
7.452  
7.447  
7.267  
7.249  
7.214  
7.191  
7.162  
7.142  
7.123  
7.083  
7.065  
7.047  
6.908  
6.890  
6.769  
6.750  
6.628  
6.623  
6.553  
6.537  
6.496  
6.475  
6.333  
6.308  
6.245  
6.241  
6.224  
6.188  
6.163

4.460

3.074

2.599

0.000

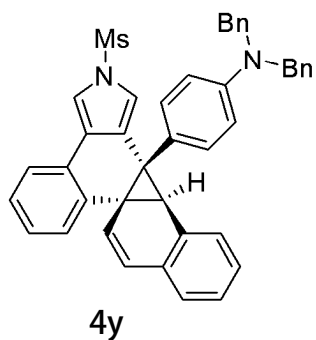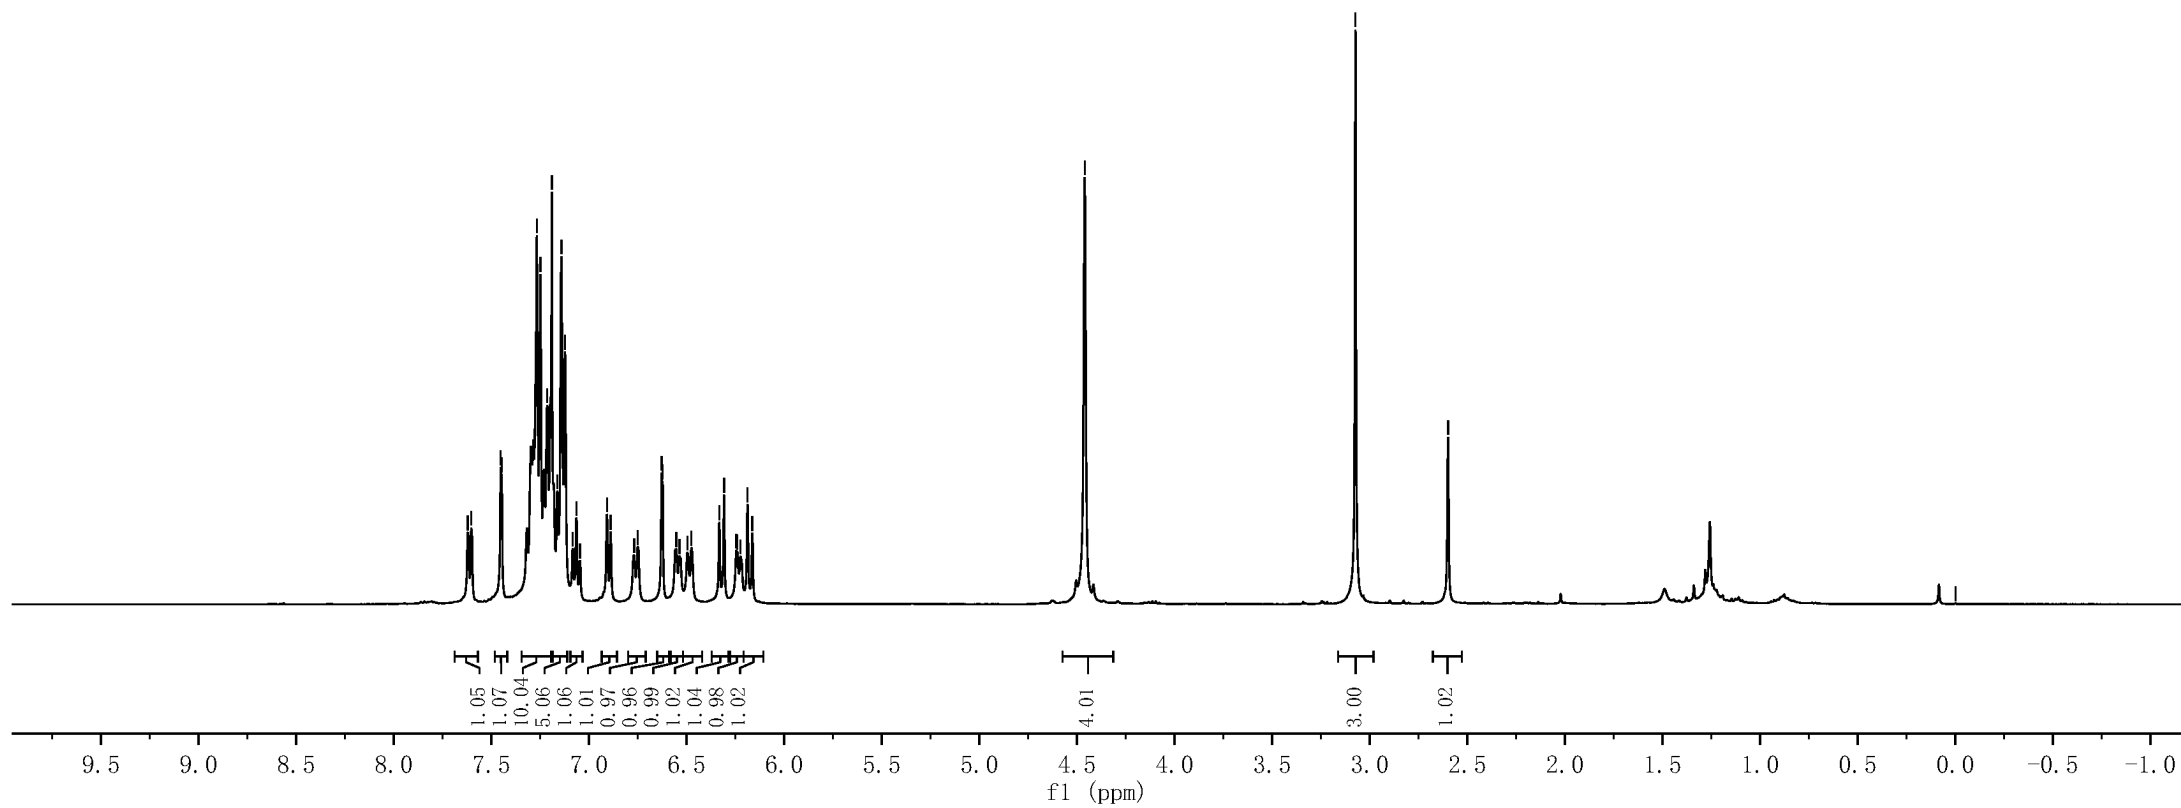

| Parameter                | Value               |
|--------------------------|---------------------|
| 1 Title                  | zyx-3-200-c         |
| 2 Origin                 | Bruker BioSpin GmbH |
| 3 Solvent                | CDCl3               |
| 4 Temperature            | 300.0               |
| 5 Number of Scans        | 43                  |
| 6 Acquisition Time       | 1.3631              |
| 7 Acquisition Date       | 2021-12-20T16:35:06 |
| 8 Spectrometer Frequency | 100.61              |
| 9 Spectral Width         | 24038.5             |

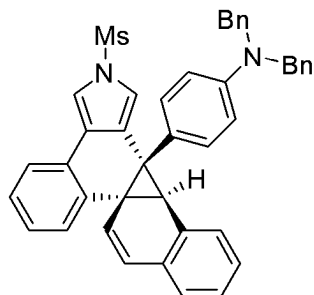

4y

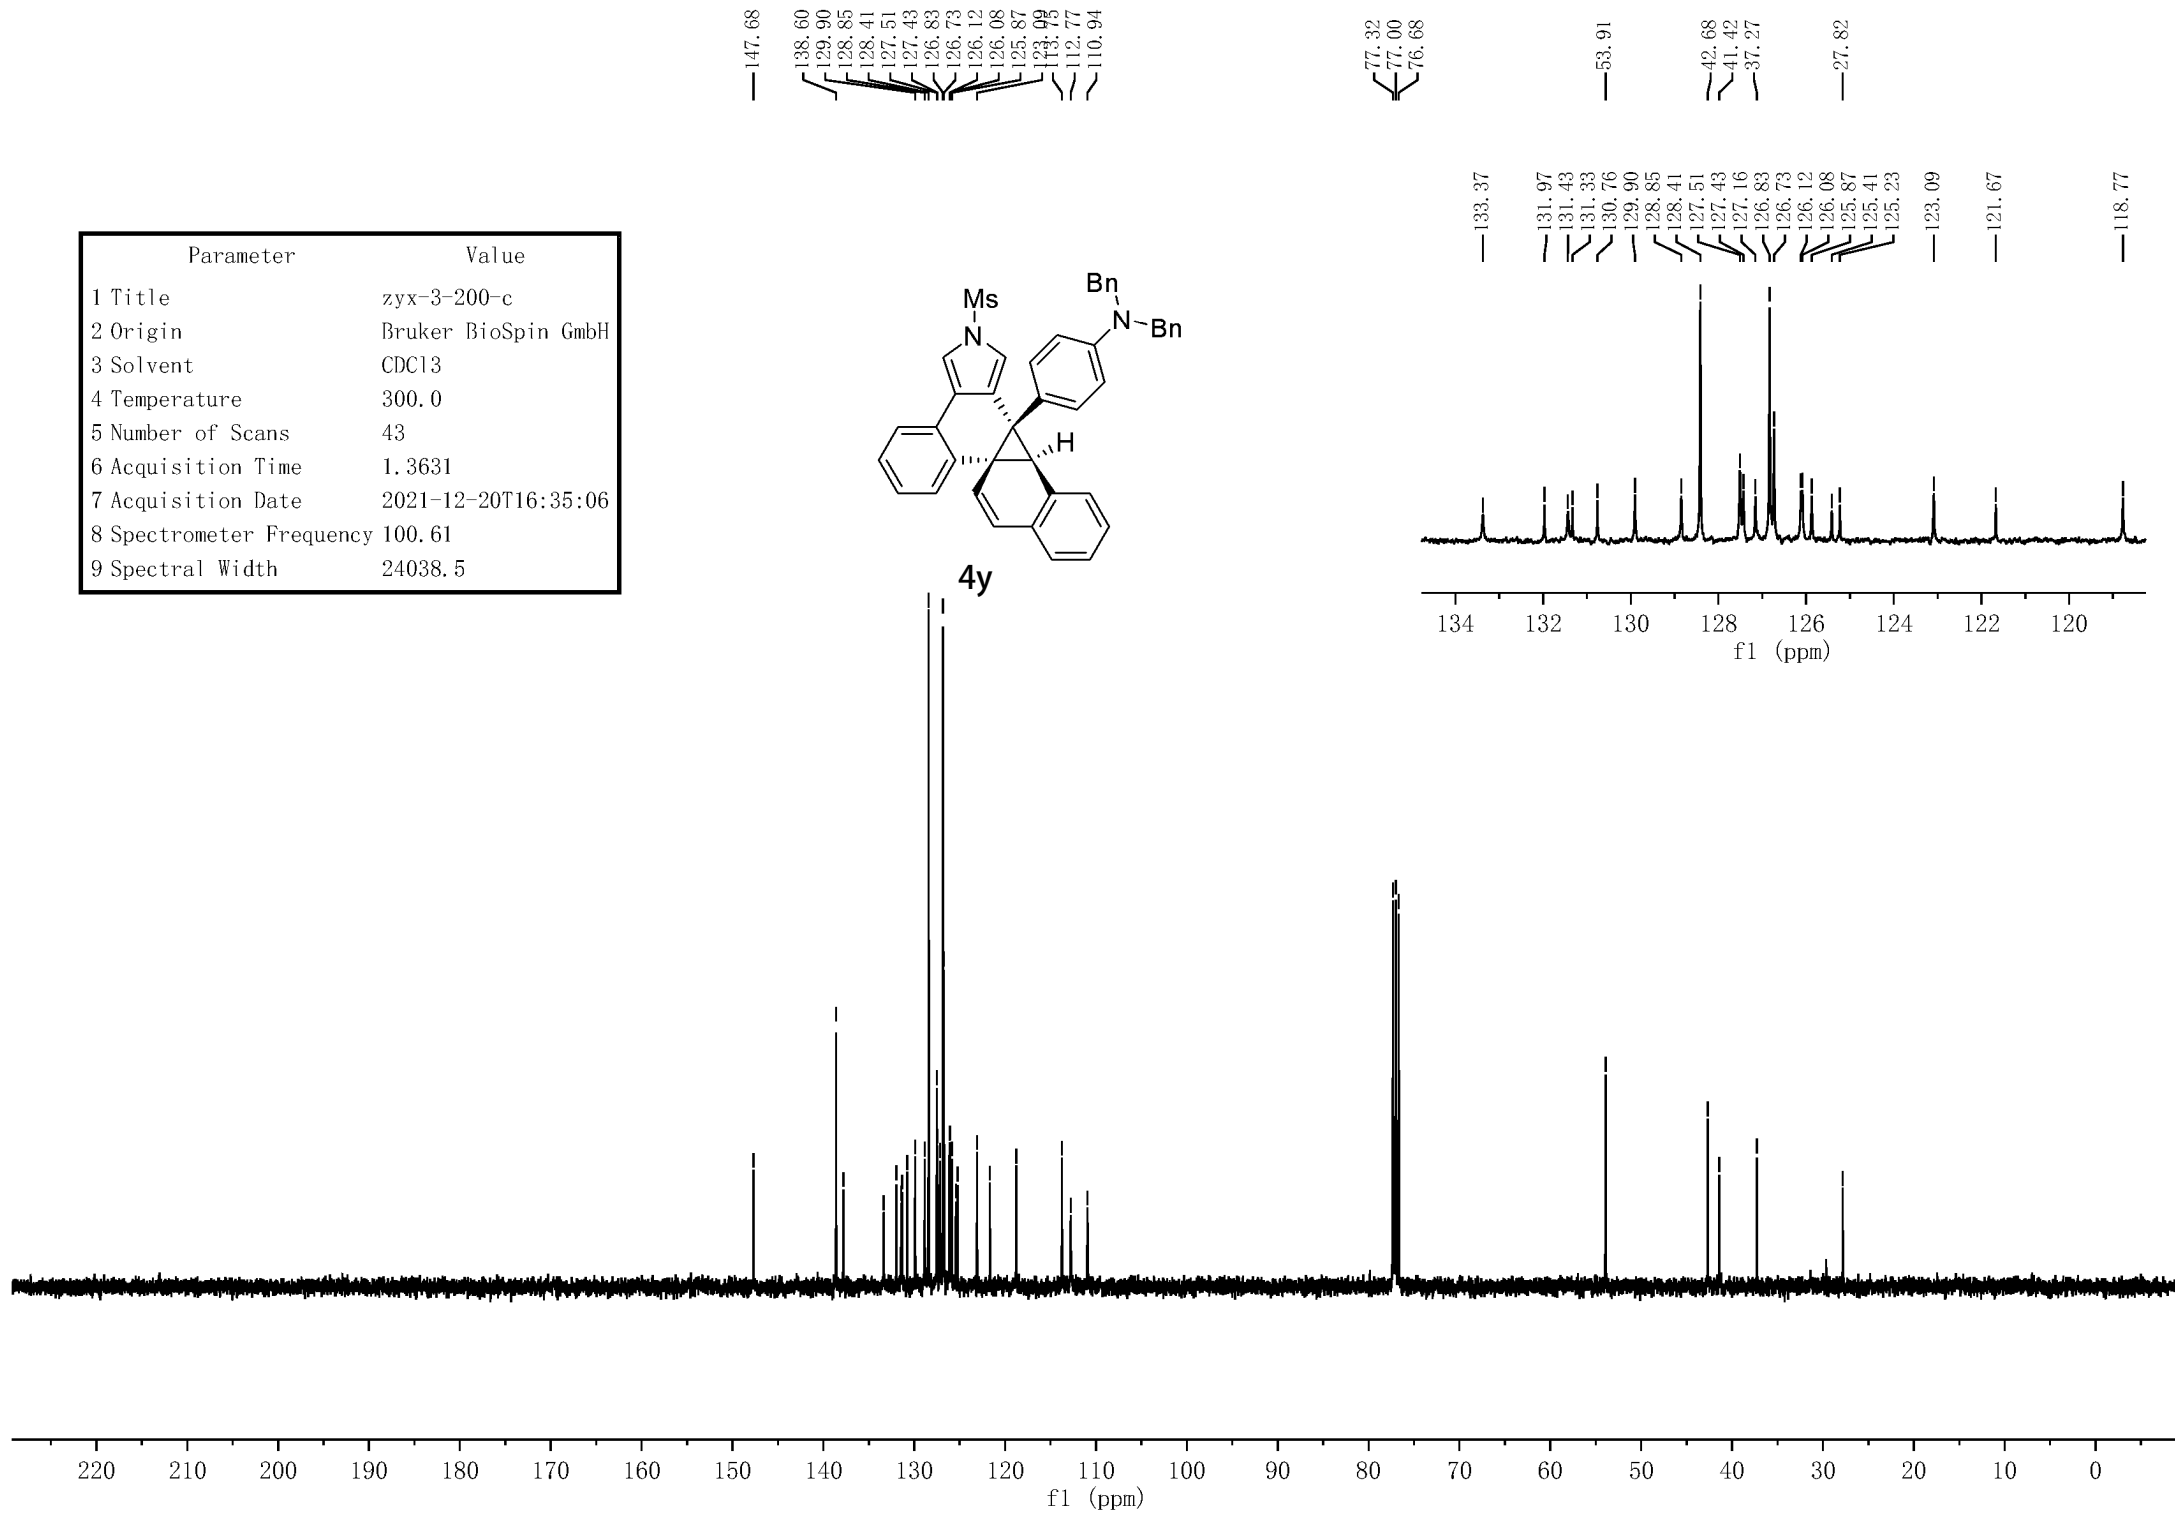



| Parameter                | Value               |
|--------------------------|---------------------|
| 1 Title                  | ZYX-13-4Z           |
| 2 Origin                 | Bruker BioSpin GmbH |
| 3 Solvent                | CDC13               |
| 4 Temperature            | 298.0               |
| 5 Number of Scans        | 9                   |
| 6 Acquisition Time       | 4.0894              |
| 7 Acquisition Date       | 2024-06-19T14:32:39 |
| 8 Spectrometer Frequency | 400.13              |
| 9 Spectral Width         | 8012.8              |

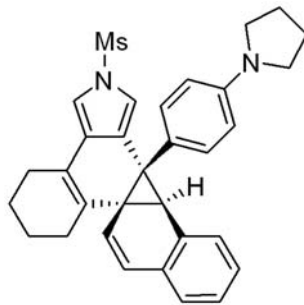

4z

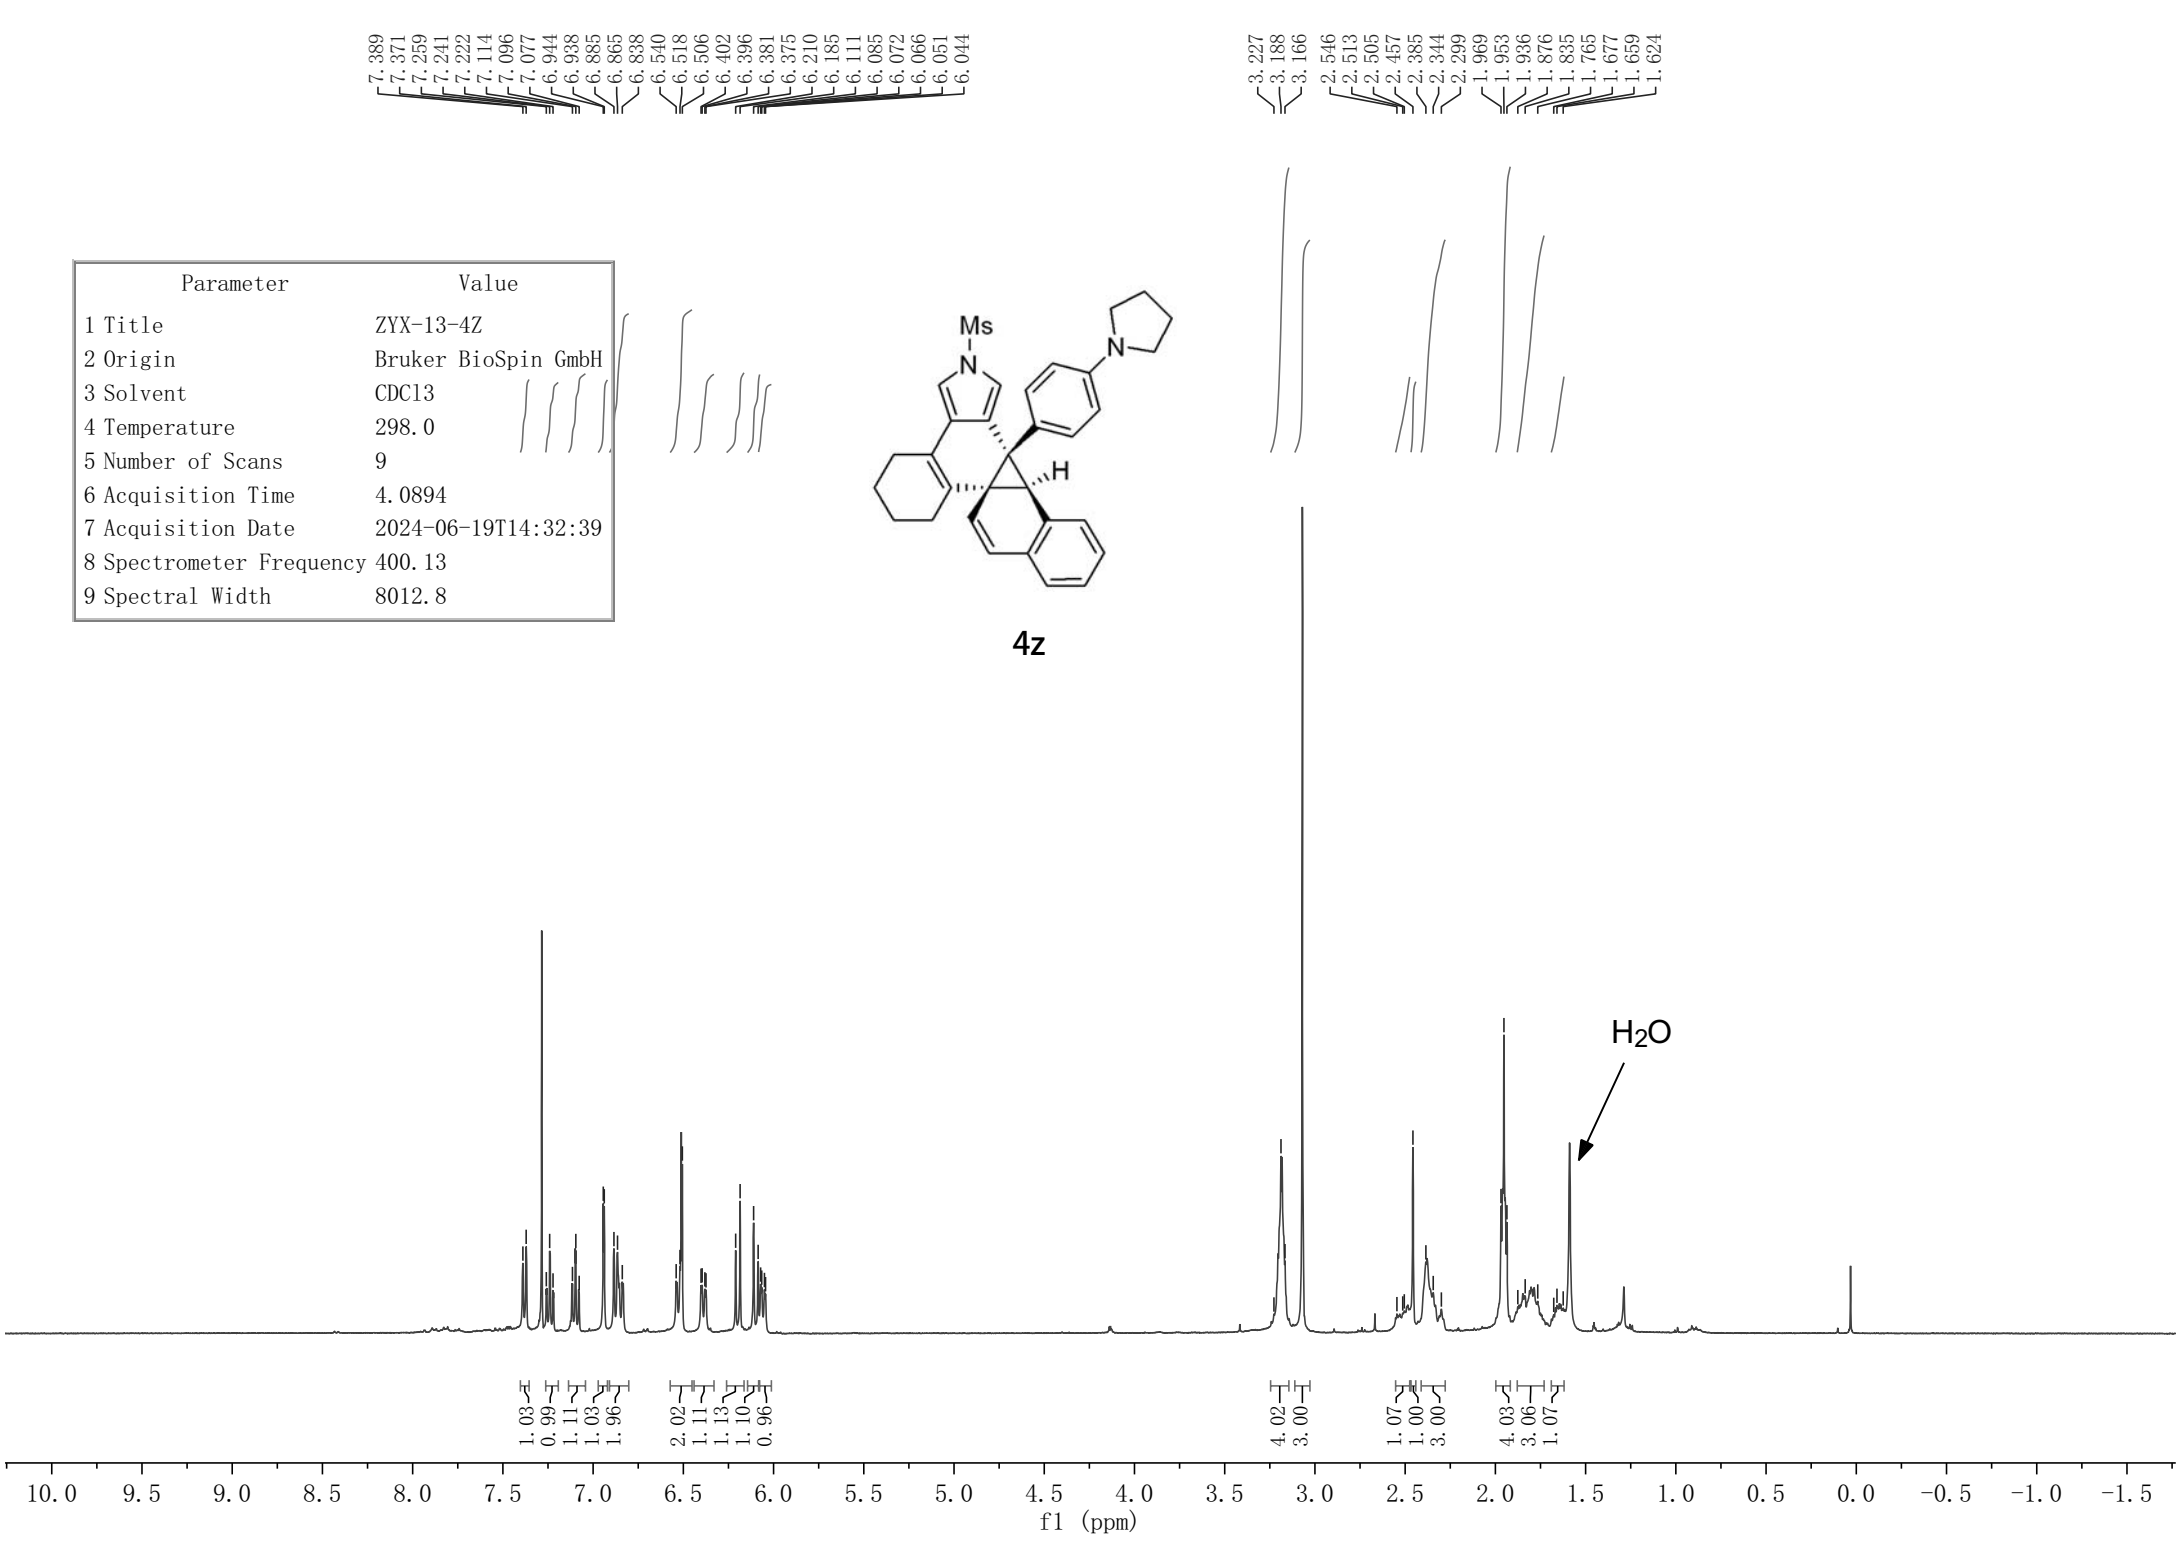

| Parameter                | Value               |
|--------------------------|---------------------|
| 1 Title                  | zyx-6--68-cc        |
| 2 Origin                 | Bruker BioSpin GmbH |
| 3 Solvent                | CDCl3               |
| 4 Temperature            | 299.6               |
| 5 Number of Scans        | 103                 |
| 6 Acquisition Time       | 1.1010              |
| 7 Acquisition Date       | 2022-08-17T21:51:10 |
| 8 Spectrometer Frequency | 125.77              |
| 9 Spectral Width         | 29761.9             |

145.91  
135.49  
133.47  
131.44  
128.56  
127.17  
127.14  
126.36  
125.79  
125.74  
118.68  
118.32  
112.22  
111.49  
109.62

77.25  
77.00  
76.75  
47.39  
42.35  
40.29  
39.22  
28.61  
28.49  
25.38  
25.23  
23.35  
22.26

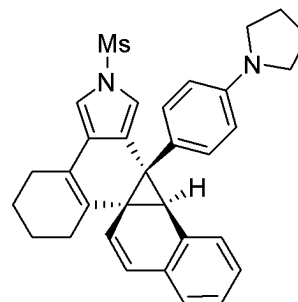

4z

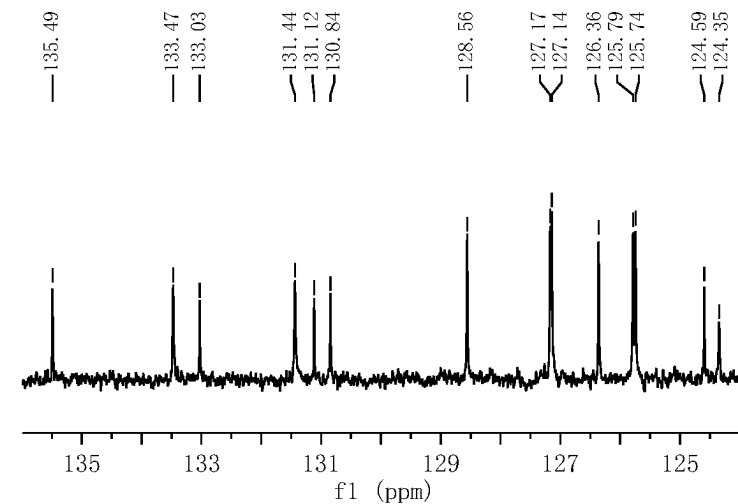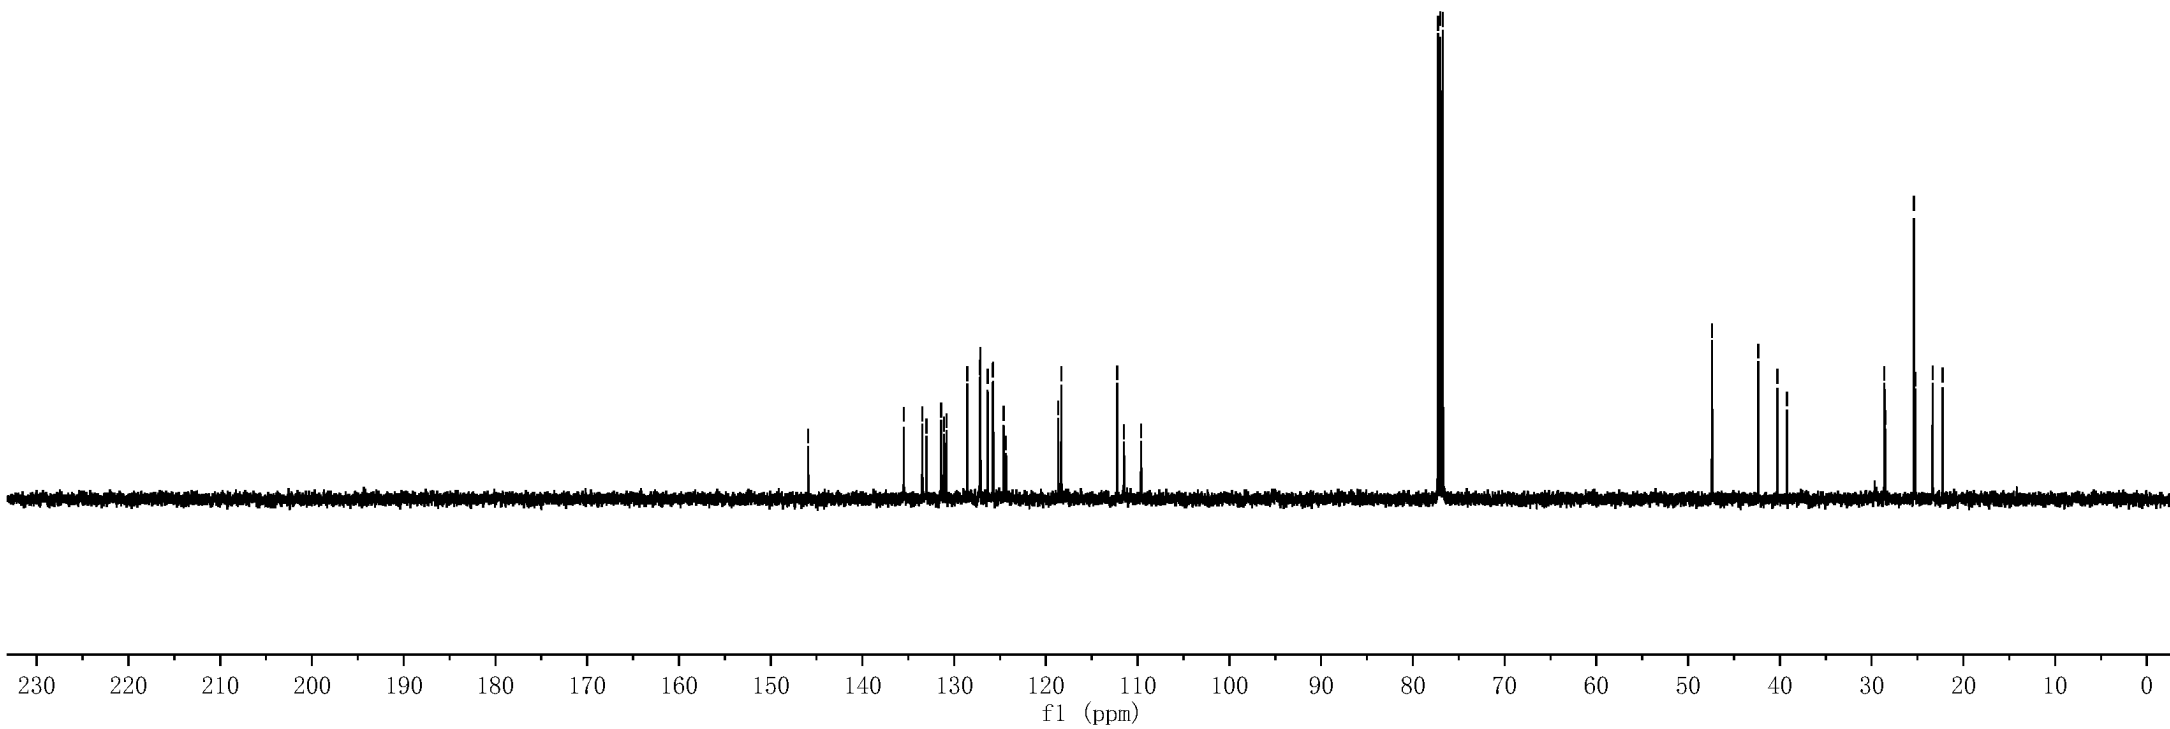

7.639  
7.637  
7.624  
7.622  
7.455  
7.448  
7.444  
7.327  
7.326  
7.312  
7.221  
7.206  
7.188  
7.162  
7.147  
7.132  
7.033  
7.019  
7.005  
6.819  
6.804  
6.556  
6.551  
6.365  
6.351  
6.315  
6.230  
6.220  
6.211  
6.200  
6.153  
6.134  
6.038  
6.023

3.204  
3.140  
3.128  
3.074

1.976  
1.965  
1.927  
1.914  
1.901

-0.000

| Parameter                | Value               |
|--------------------------|---------------------|
| 1 Title                  | zxy-4-127-h         |
| 2 Origin                 | Bruker BioSpin GmbH |
| 3 Solvent                | CDCl3               |
| 4 Temperature            | 297.4               |
| 5 Number of Scans        | 10                  |
| 6 Acquisition Time       | 3.1719              |
| 7 Acquisition Date       | 2022-03-03T15:46:31 |
| 8 Spectrometer Frequency | 500.17              |
| 9 Spectral Width         | 10330.6             |

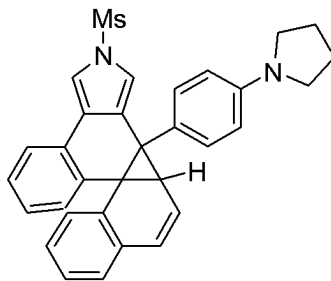

4aa

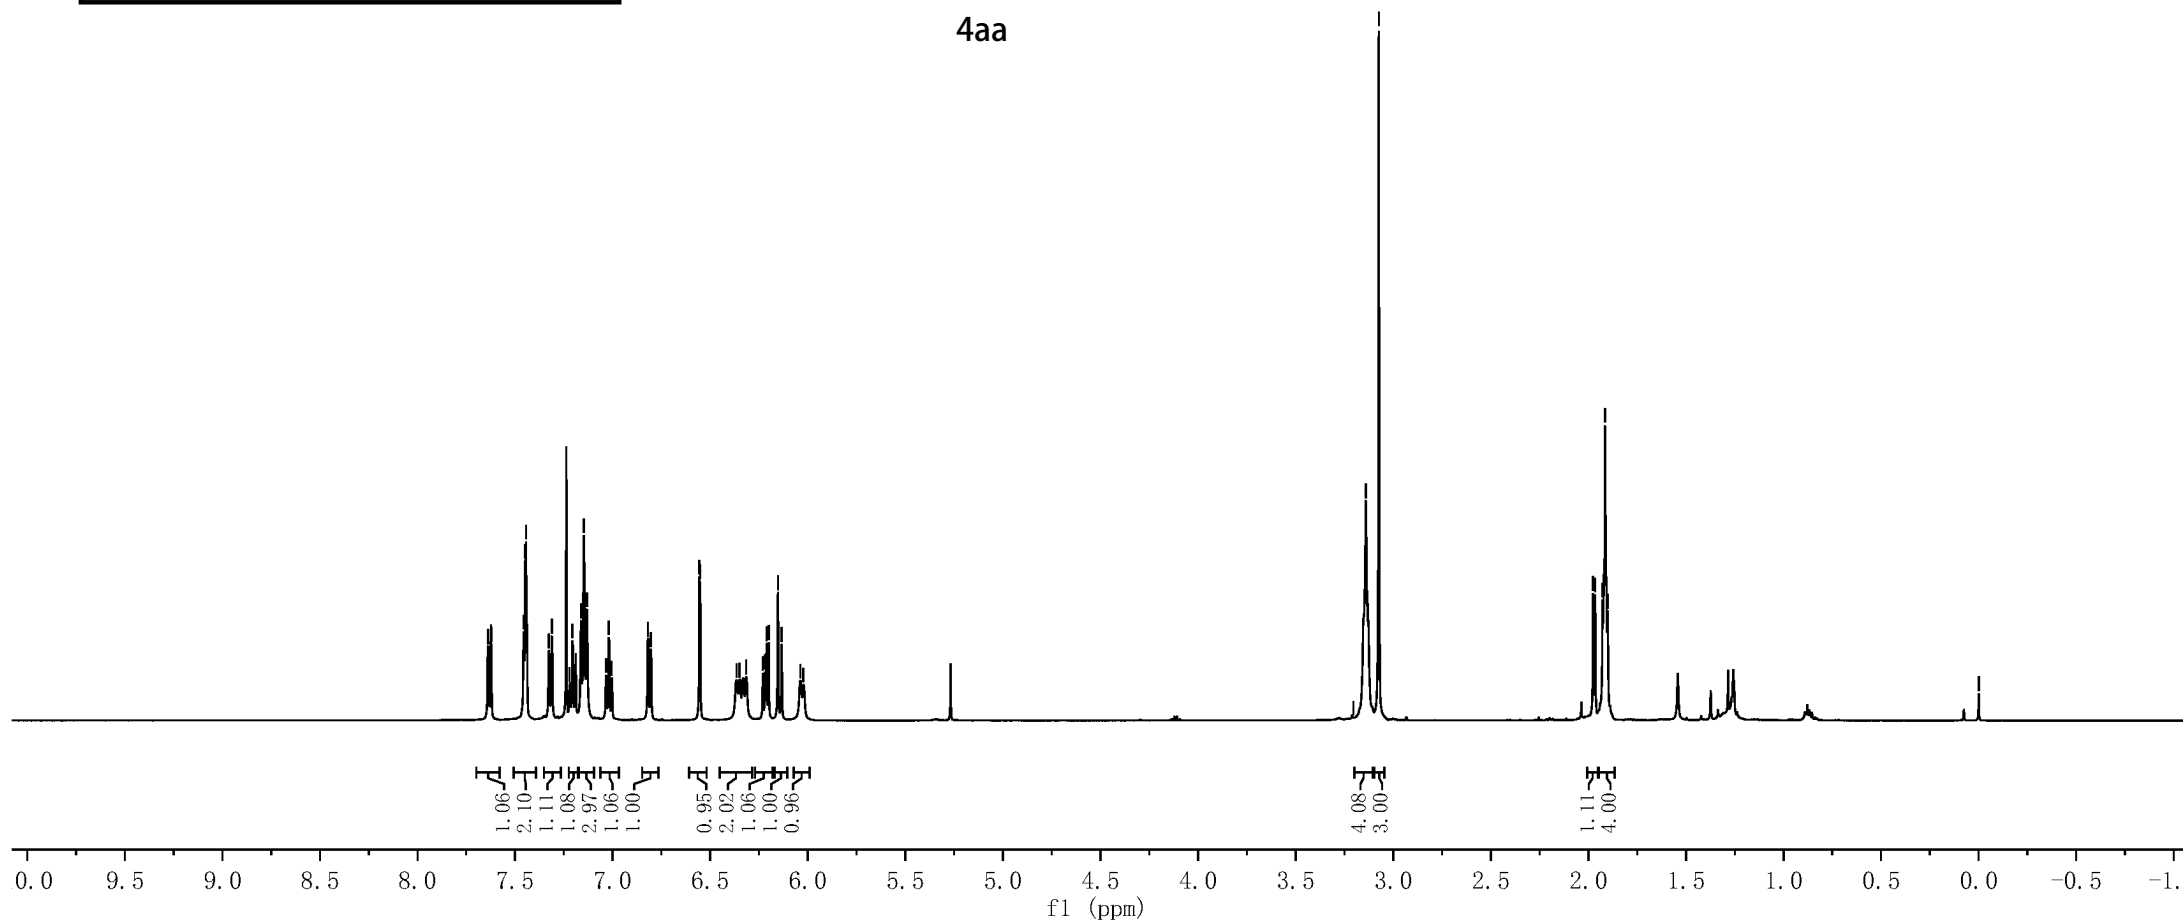

| Parameter                | Value               |
|--------------------------|---------------------|
| 1 Title                  | zxy-4-127-c         |
| 2 Origin                 | Bruker BioSpin GmbH |
| 3 Solvent                | CDCl3               |
| 4 Temperature            | 297.8               |
| 5 Number of Scans        | 16                  |
| 6 Acquisition Time       | 1.1010              |
| 7 Acquisition Date       | 2022-03-03T15:48:11 |
| 8 Spectrometer Frequency | 125.77              |
| 9 Spectral Width         | 29761.9             |

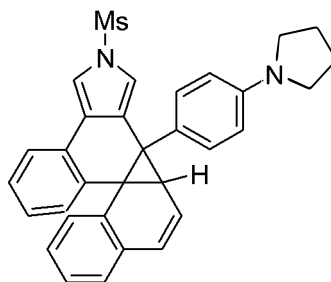

4aa

145.98  
138.53  
131.22  
130.88  
127.01  
126.69  
126.67  
125.96  
125.94  
125.90  
118.63  
111.33  
109.78

77.25  
77.00  
76.75  
47.38  
42.66  
39.27  
37.95  
28.18  
25.35

133.61  
133.51  
132.74  
132.07  
131.22  
131.18  
130.88  
127.01  
126.69  
126.67  
125.96  
125.94  
125.90  
124.24  
123.32  
123.07  
121.75

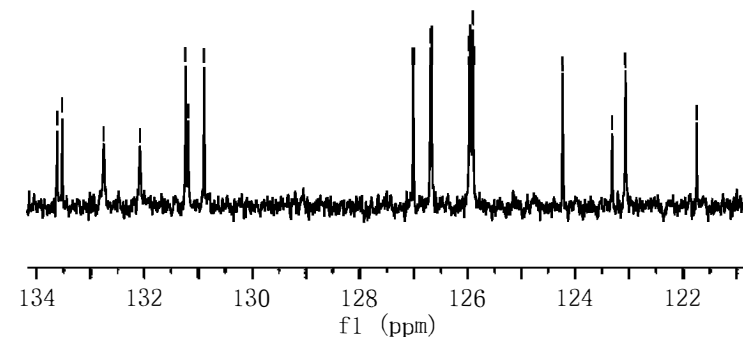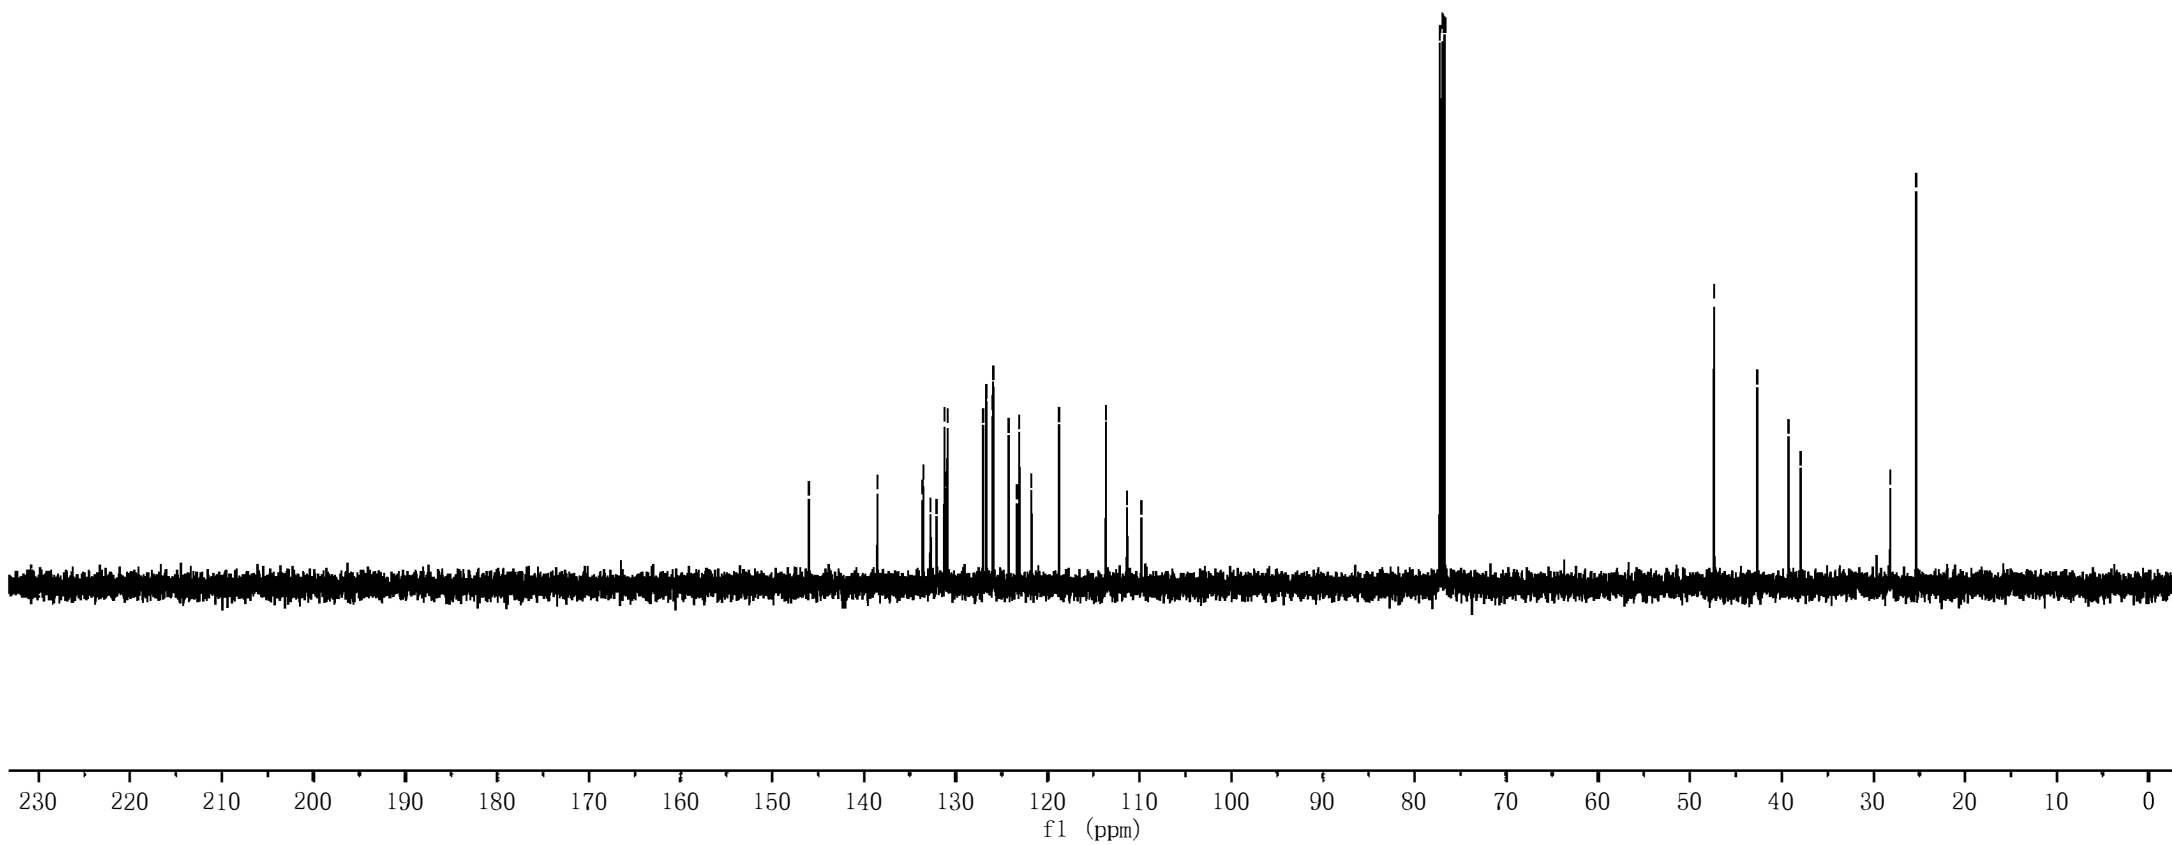

| Parameter                | Value               |
|--------------------------|---------------------|
| 1 Title                  | zyx-3-164-1-h       |
| 2 Origin                 | Bruker BioSpin GmbH |
| 3 Solvent                | CDCl3               |
| 4 Temperature            | 298.0               |
| 5 Number of Scans        | 7                   |
| 6 Acquisition Time       | 4.0894              |
| 7 Acquisition Date       | 2021-12-08T16:05:43 |
| 8 Spectrometer Frequency | 400.13              |
| 9 Spectral Width         | 8012.8              |

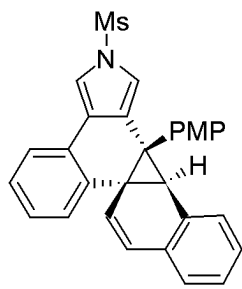

4ab

7.651  
7.633  
7.478  
7.474  
7.339  
7.300  
7.263  
7.118  
7.100  
7.082  
6.927  
6.905  
6.886  
6.709  
6.688  
6.643  
6.625  
6.543  
6.539  
6.416  
6.411  
6.395  
6.331  
6.306  
6.232  
6.208

3.673  
3.102  
2.659

0.000

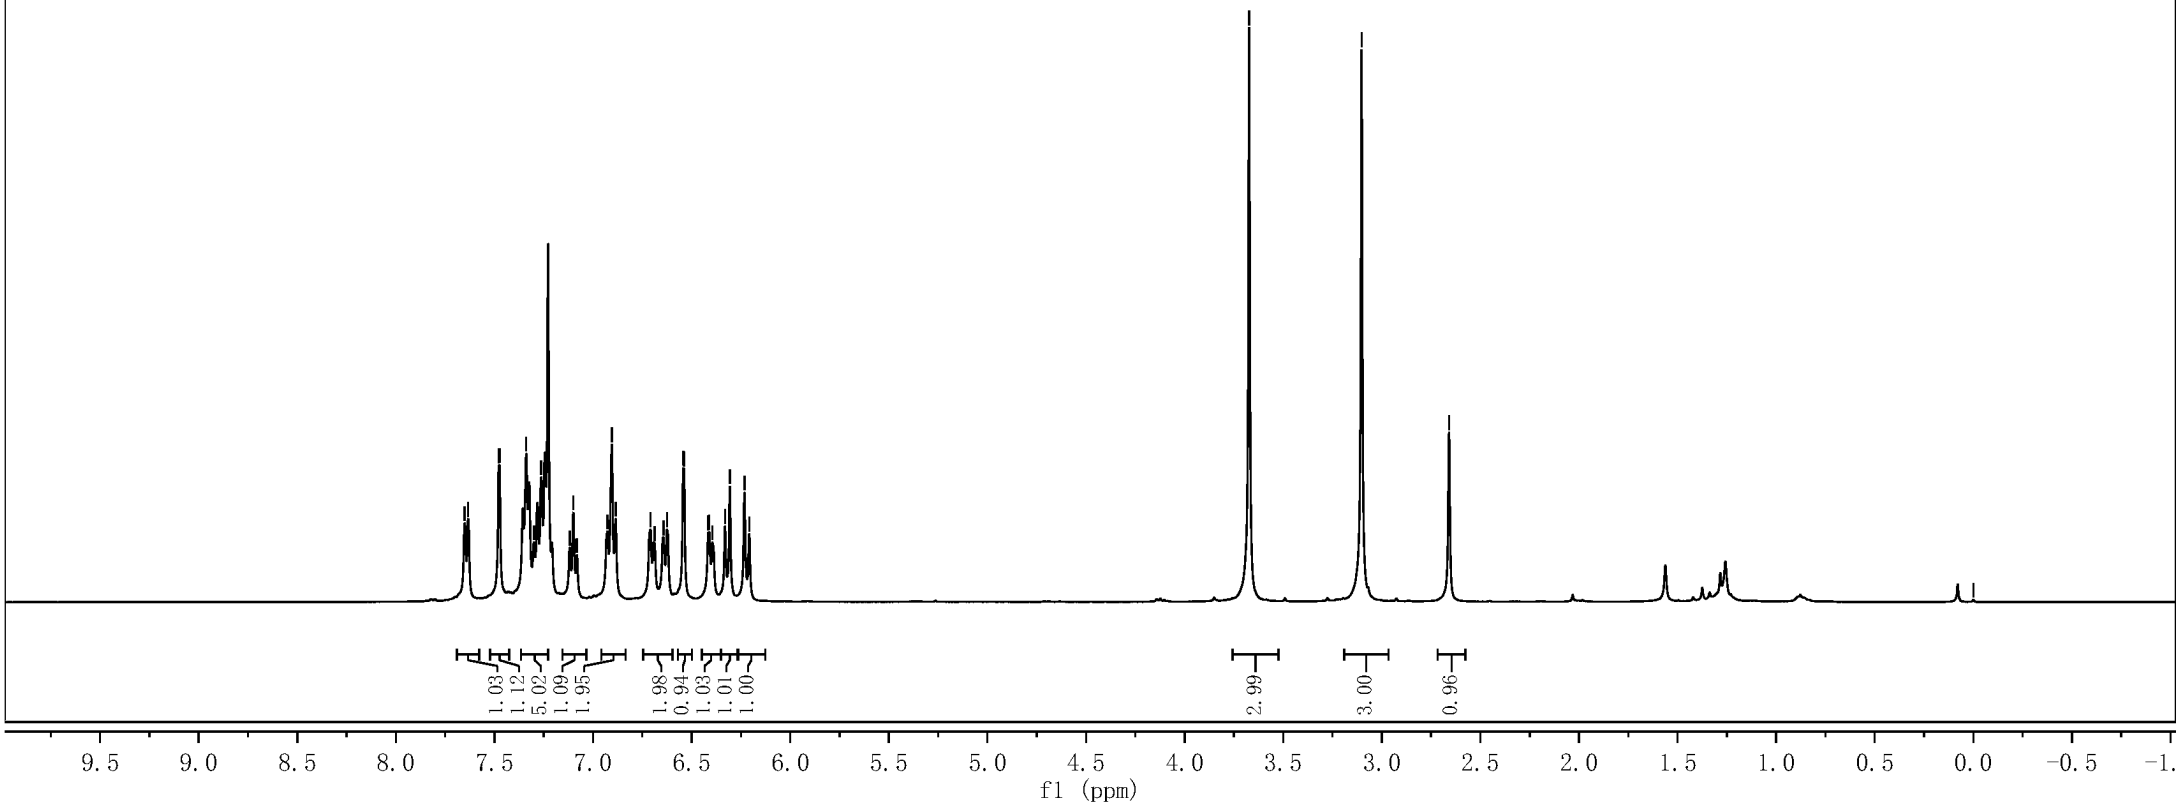

| Parameter                | Value               |
|--------------------------|---------------------|
| 1 Title                  | zyx-3-164-1-c       |
| 2 Origin                 | Bruker BioSpin GmbH |
| 3 Solvent                | CDCl3               |
| 4 Temperature            | 300.0               |
| 5 Number of Scans        | 66                  |
| 6 Acquisition Time       | 1.3631              |
| 7 Acquisition Date       | 2021-12-08T16:06:58 |
| 8 Spectrometer Frequency | 100.61              |
| 9 Spectral Width         | 24038.5             |

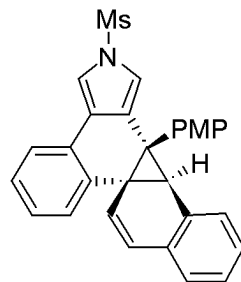

4ab

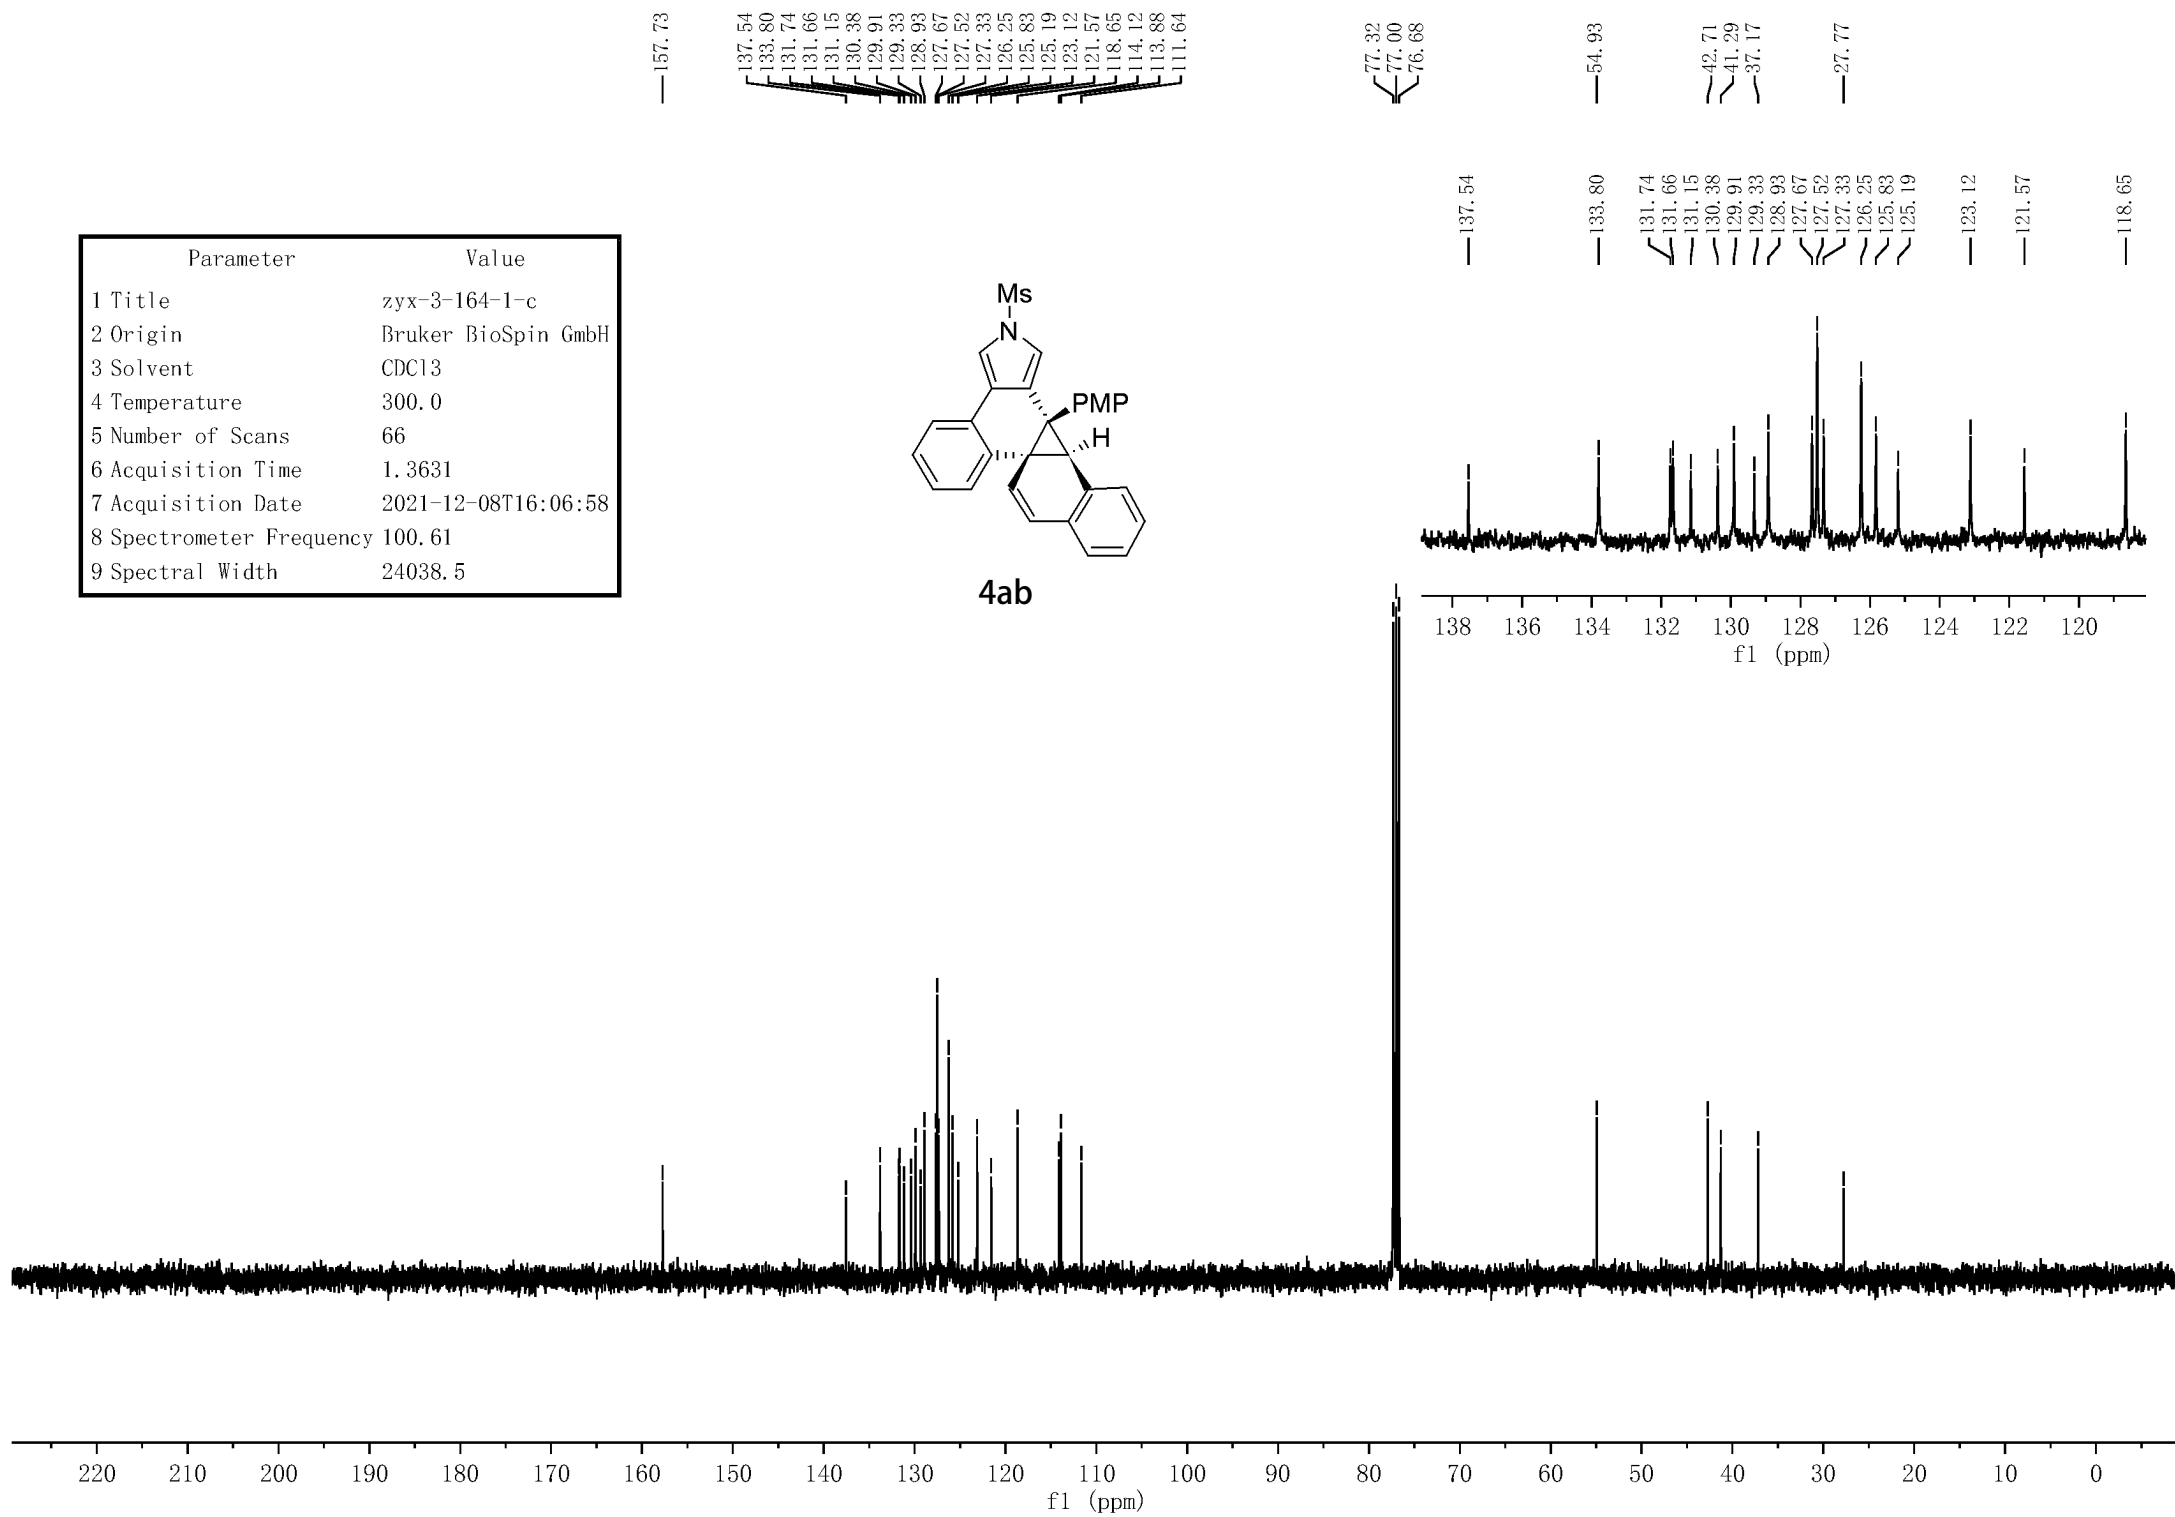

| Parameter                | Value               |
|--------------------------|---------------------|
| 1 Title                  | ZYX-13--2AE         |
| 2 Origin                 | Bruker BioSpin GmbH |
| 3 Solvent                | CDCl3               |
| 4 Temperature            | 298.0               |
| 5 Number of Scans        | 4                   |
| 6 Acquisition Time       | 4.0894              |
| 7 Acquisition Date       | 2024-06-21T09:20:39 |
| 8 Spectrometer Frequency | 400.13              |
| 9 Spectral Width         | 8012.8              |

7.729  
7.711  
7.706  
7.489  
7.478  
7.472  
7.425  
7.420  
7.227  
7.210  
7.191  
7.143  
7.132  
7.120  
7.035  
7.013  
7.004  
6.549  
6.520  
6.508  
6.485  
6.018  
5.989

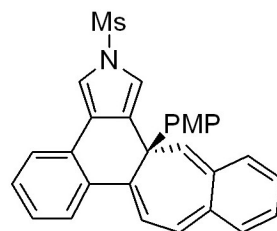

4ab'

3.604  
3.151

0.000

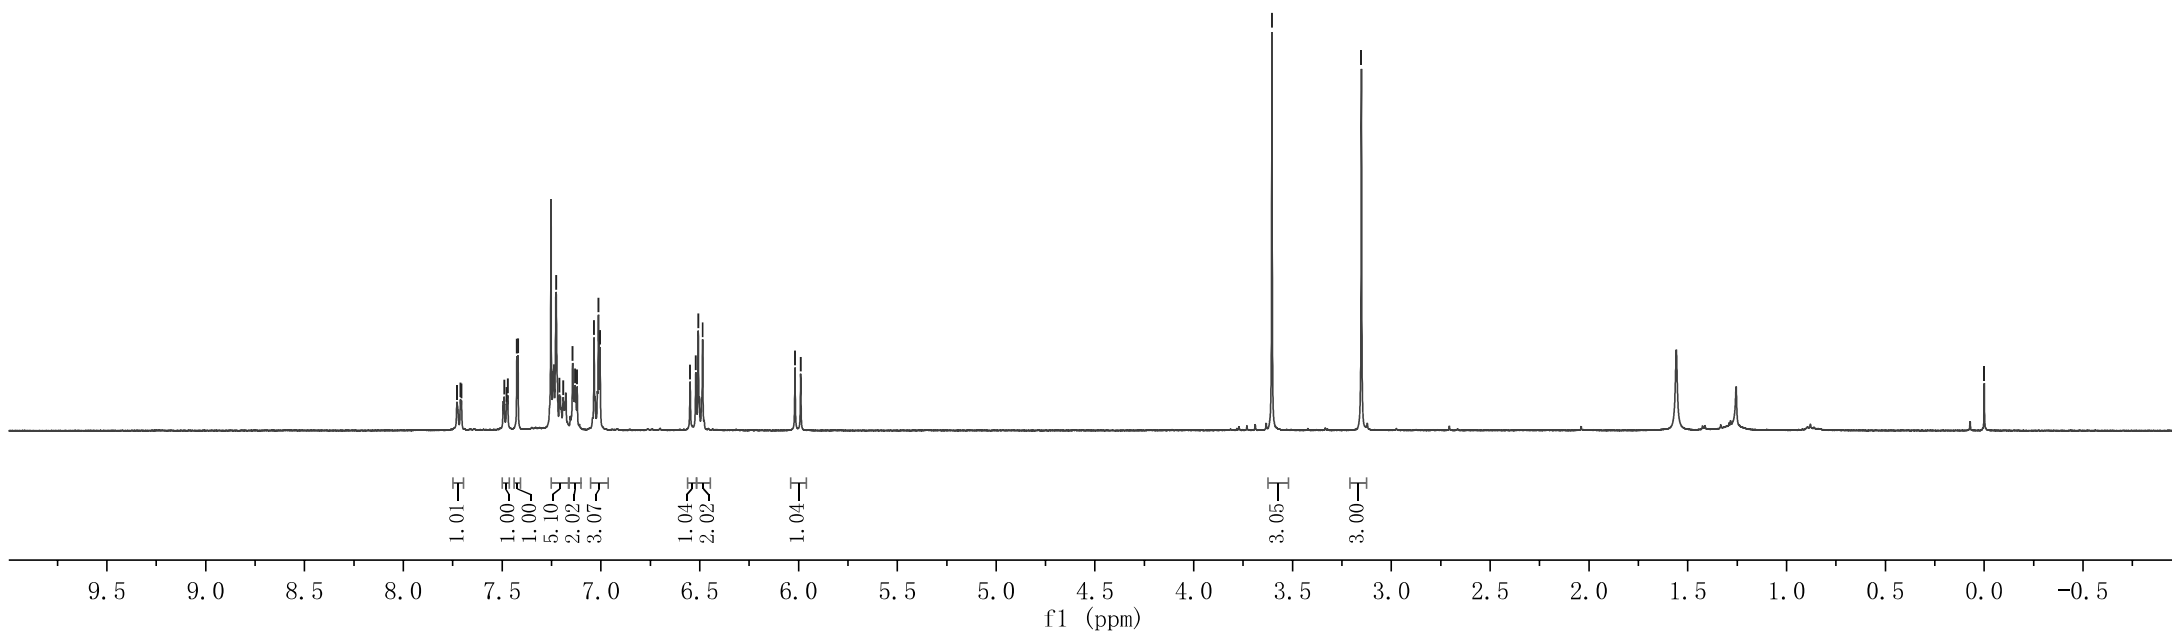

| Parameter                | Value               |
|--------------------------|---------------------|
| 1 Title                  | zyx-3-166-2--c      |
| 2 Origin                 | Bruker BioSpin GmbH |
| 3 Solvent                | CDC13               |
| 4 Temperature            | 300.0               |
| 5 Number of Scans        | 89                  |
| 6 Acquisition Time       | 1.3631              |
| 7 Acquisition Date       | 2021-12-11T16:06:25 |
| 8 Spectrometer Frequency | 100.61              |
| 9 Spectral Width         | 24038.5             |

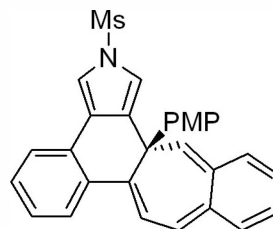

4ab'

157.51  
139.92  
135.04  
134.44  
132.07  
130.27  
128.35  
128.01  
127.76  
127.61  
127.59  
127.29  
127.01  
126.53  
123.62  
117.65  
113.57  
112.94

77.32  
77.00  
76.68

54.96

48.75

42.80

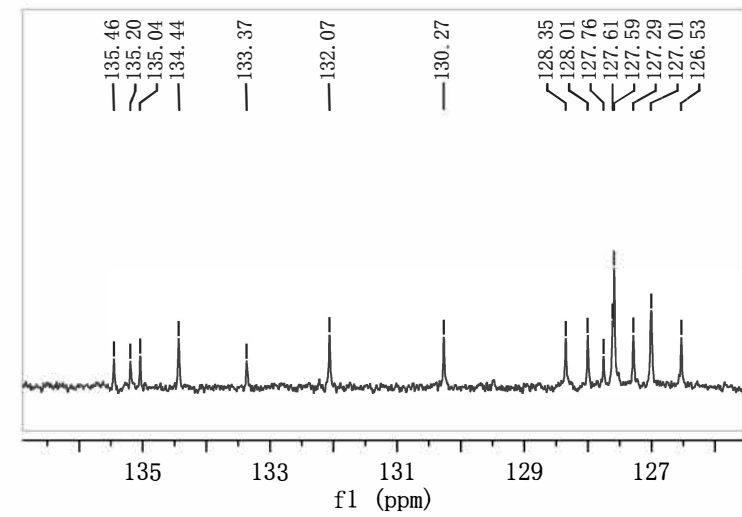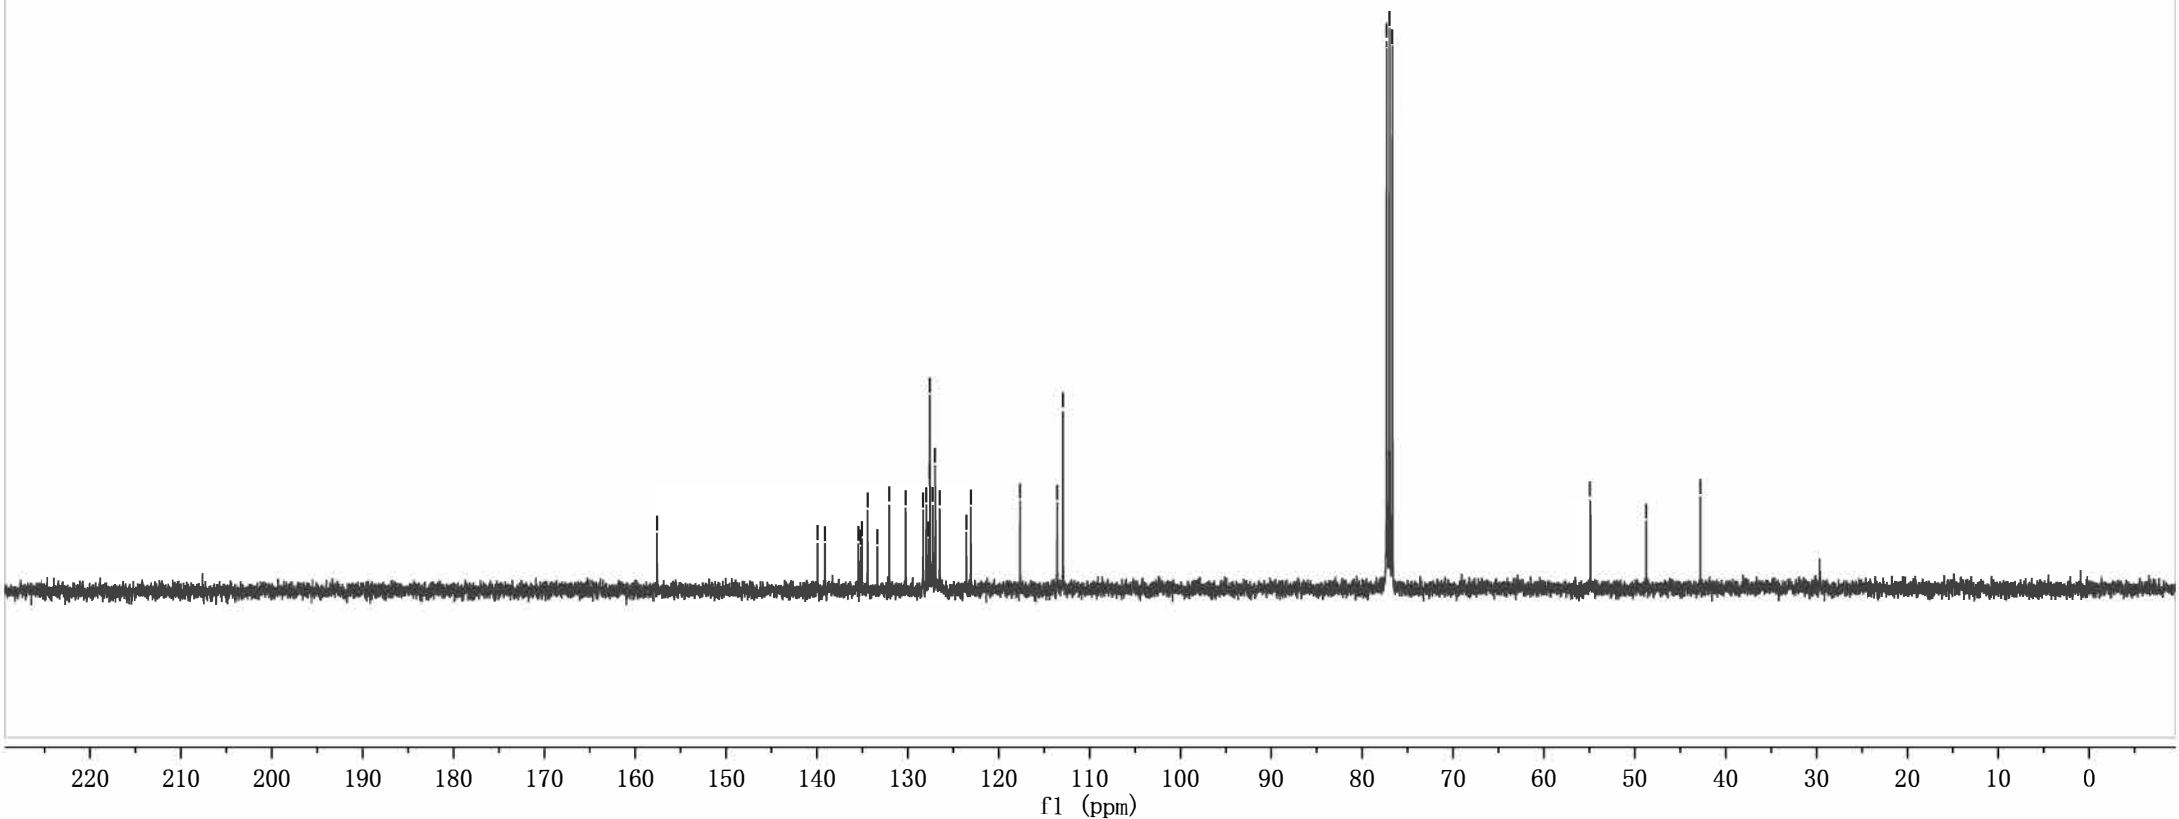



| Parameter                | Value               |
|--------------------------|---------------------|
| 1 Title                  | zyx-14-46-400       |
| 2 Origin                 |                     |
| 3 Solvent                | CDCl3               |
| 4 Temperature            | 299.0               |
| 5 Number of Scans        | 16                  |
| 6 Acquisition Time       | 4.0002              |
| 7 Acquisition Date       | 2024-08-12T14:24:17 |
| 8 Spectrometer Frequency | 399.89              |
| 9 Spectral Width         | 8012.0              |

7.384  
7.366  
7.276  
7.263  
7.232  
7.217  
7.204  
7.124  
7.106  
7.087  
6.915  
6.897  
6.856  
6.835  
6.594  
6.589  
6.562  
6.535  
6.515  
6.318  
6.293  
6.239  
6.227  
6.215

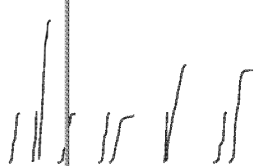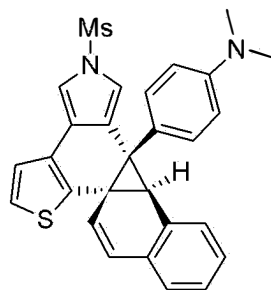

3.092  
2.831  
2.672

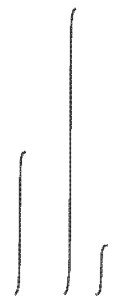

0.000

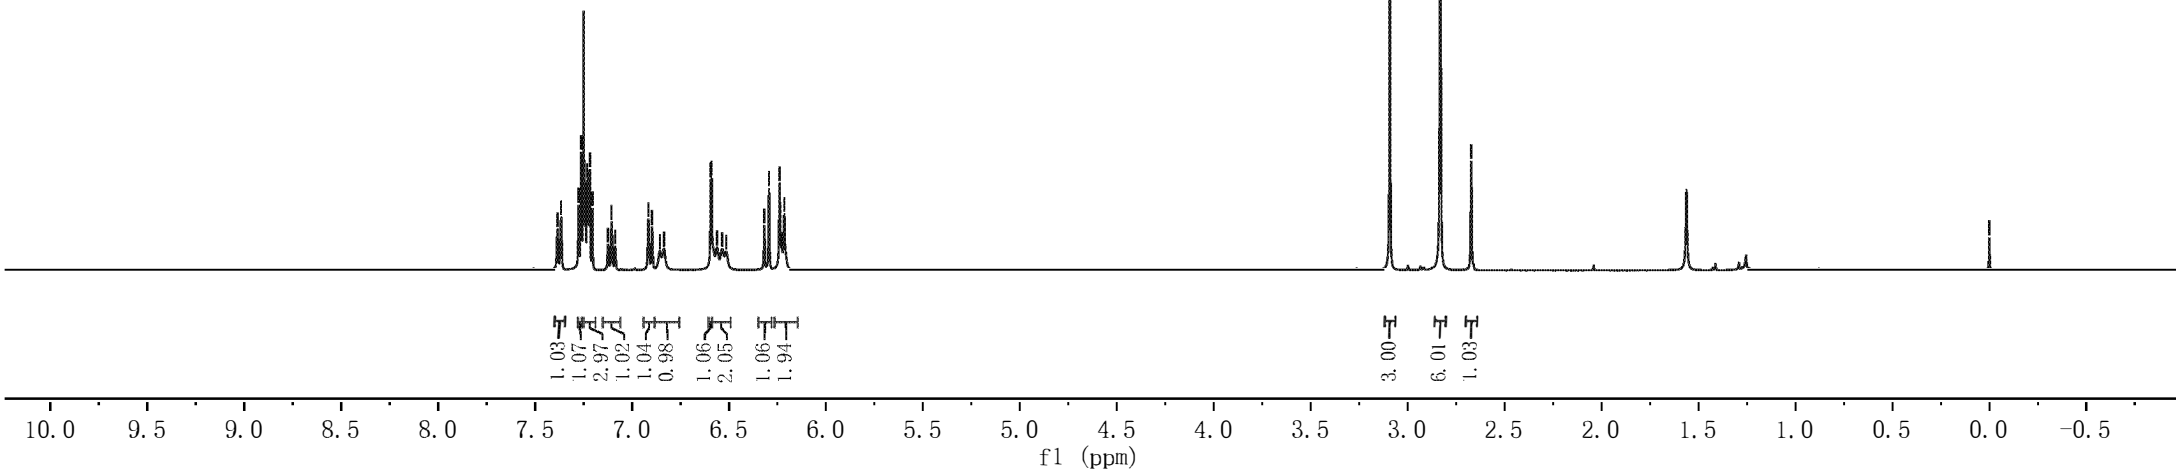

| Parameter                | Value               |
|--------------------------|---------------------|
| 1 Title                  | zyx-14-46-400       |
| 2 Origin                 |                     |
| 3 Solvent                | CDC13               |
| 4 Temperature            | 298.8               |
| 5 Number of Scans        | 800                 |
| 6 Acquisition Time       | 1.0000              |
| 7 Acquisition Date       | 2024-08-12T14:53:22 |
| 8 Spectrometer Frequency | 100.55              |
| 9 Spectral Width         | 26041.0             |

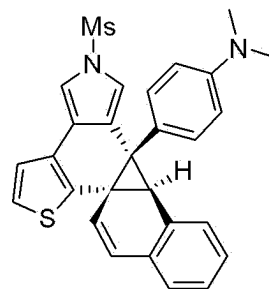

4ac

148.70  
142.20  
128.83  
128.28  
127.74  
127.57  
126.21  
124.72  
124.35  
122.91  
119.39  
112.31  
110.62

77.32  
77.00  
76.68

42.61  
41.29  
40.34  
36.70  
29.40

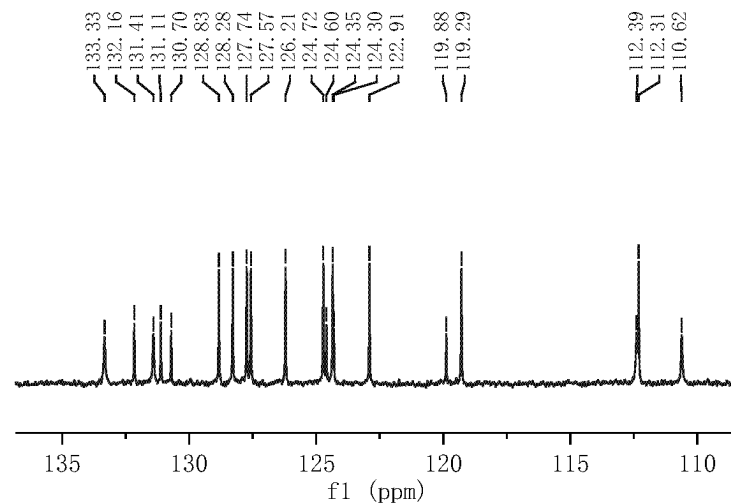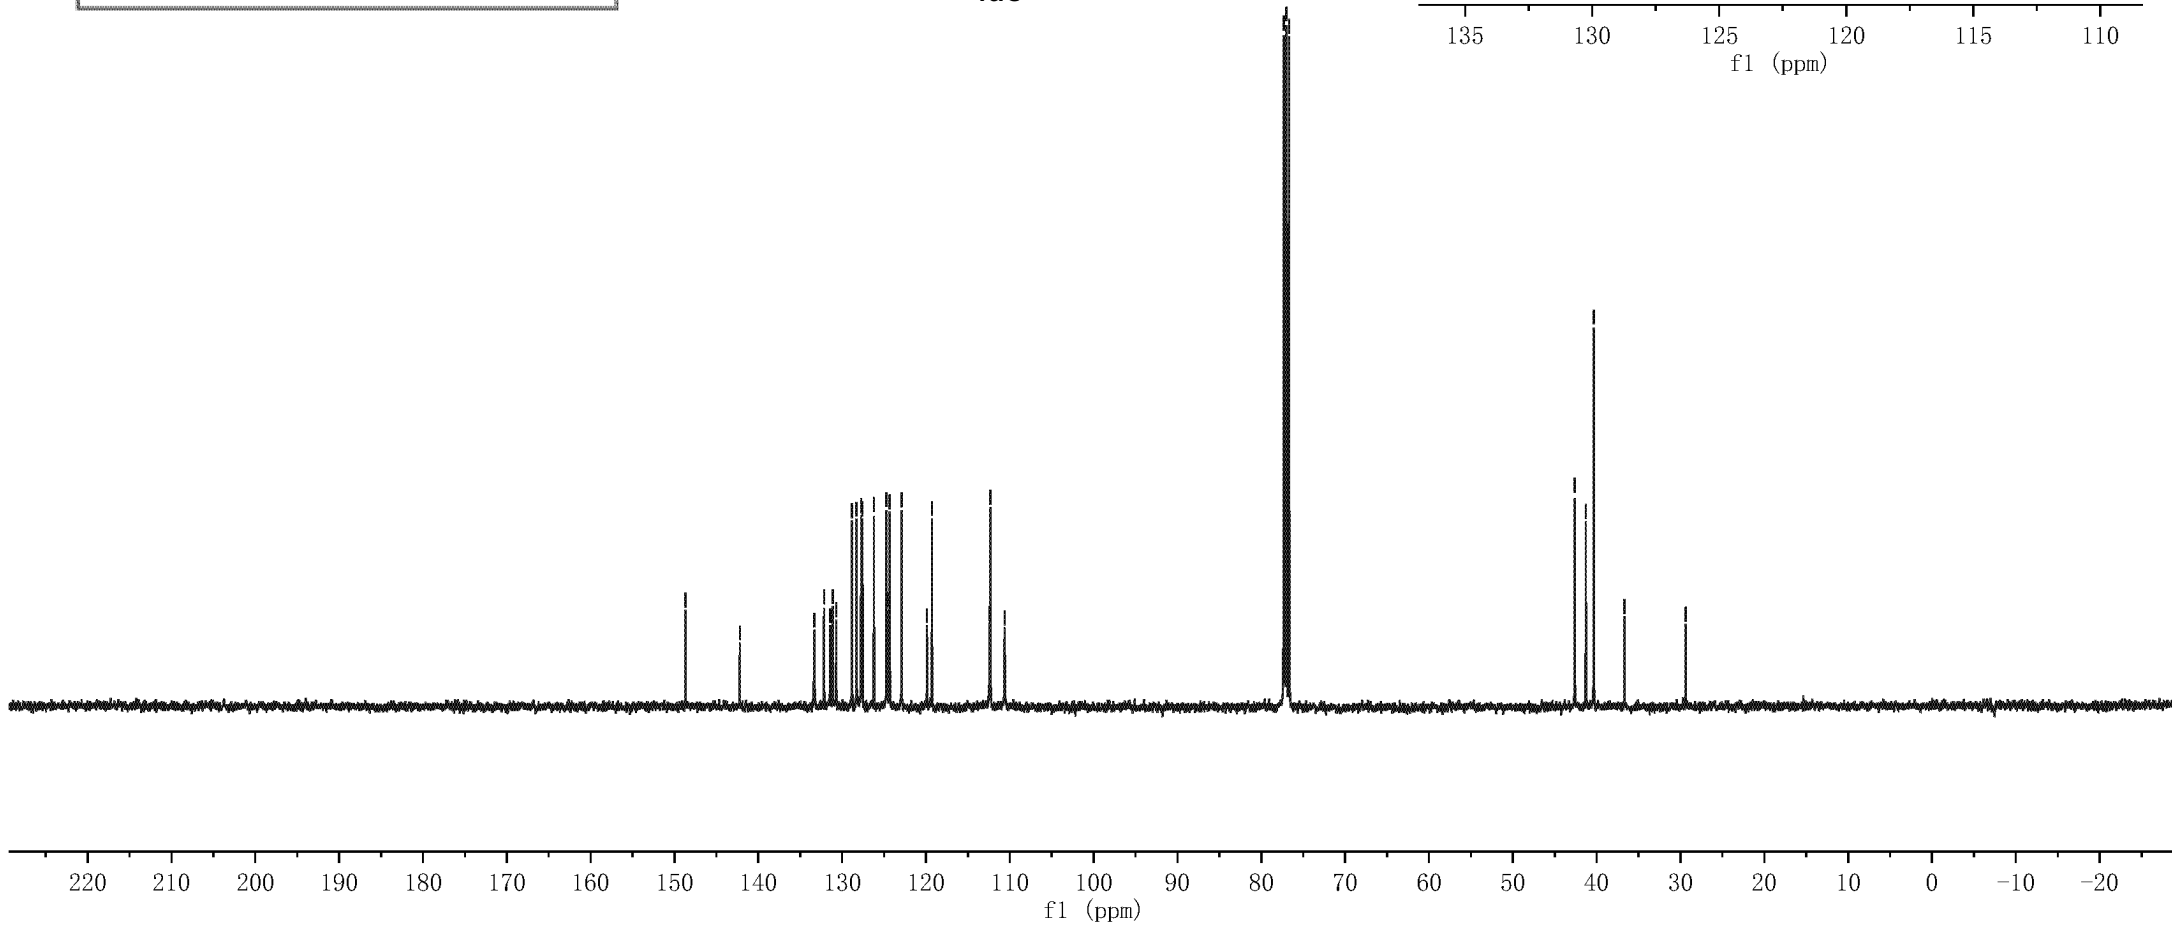

7.364  
7.347  
7.342  
7.229  
7.226  
7.214  
7.211  
7.199  
7.196  
7.103  
7.101  
7.088  
7.086  
7.073  
7.071  
7.048  
7.042  
6.896  
6.882  
6.848  
6.834  
6.569  
6.565  
6.543  
6.531  
6.514  
6.317  
6.298  
6.244  
6.225  
6.212  
6.209  
6.203

| Parameter                | Value               |
|--------------------------|---------------------|
| 1 Title                  | zyx-14-45-h         |
| 2 Origin                 | Bruker BioSpin GmbH |
| 3 Solvent                | CDCl3               |
| 4 Temperature            | 300.0               |
| 5 Number of Scans        | 5                   |
| 6 Acquisition Time       | 3.1719              |
| 7 Acquisition Date       | 2024-08-12T11:29:04 |
| 8 Spectrometer Frequency | 500.17              |
| 9 Spectral Width         | 10330.6             |

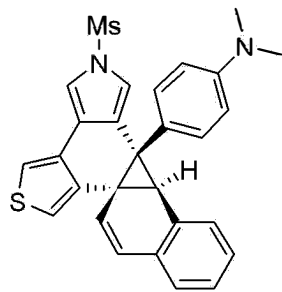

4ad

3.075  
2.820  
2.675

0.000

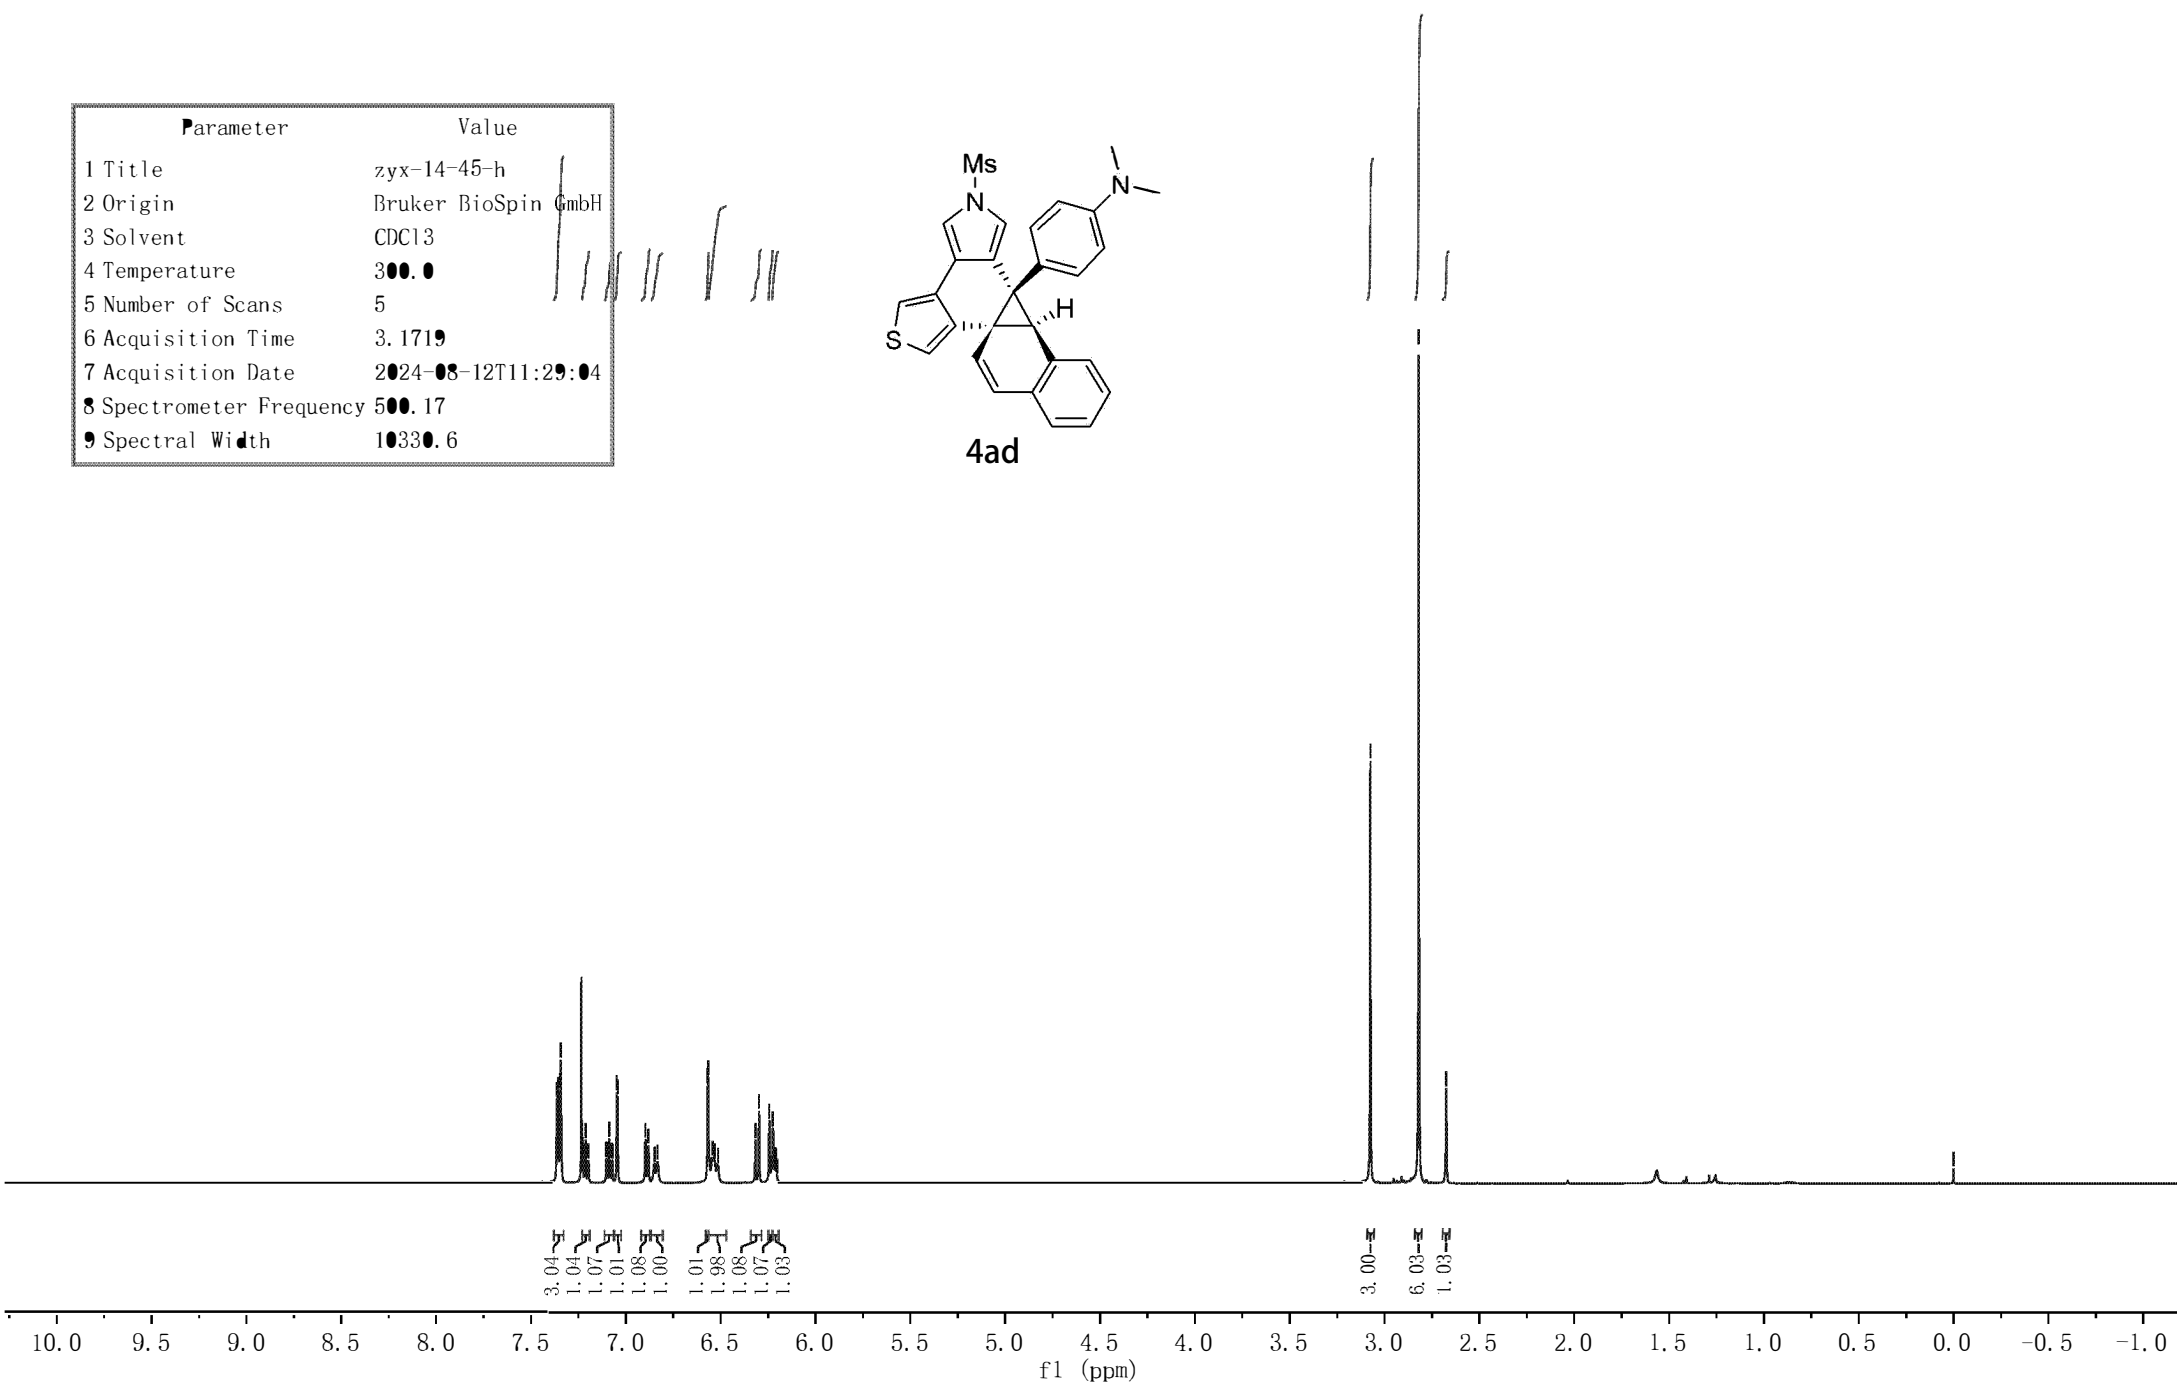

| Parameter                | Value               |
|--------------------------|---------------------|
| 1 Title                  | zyx-14-45-c         |
| 2 Origin                 | Bruker BioSpin GmbH |
| 3 Solvent                | CDCl3               |
| 4 Temperature            | 299.0               |
| 5 Number of Scans        | 68                  |
| 6 Acquisition Time       | 1.1010              |
| 7 Acquisition Date       | 2024-08-12T11:34:46 |
| 8 Spectrometer Frequency | 125.77              |
| 9 Spectral Width         | 29761.9             |

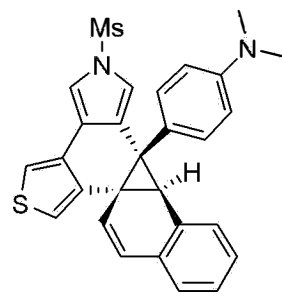

4ad

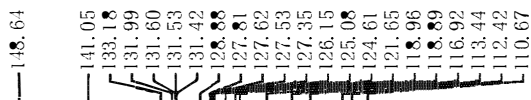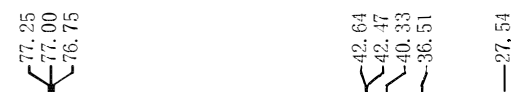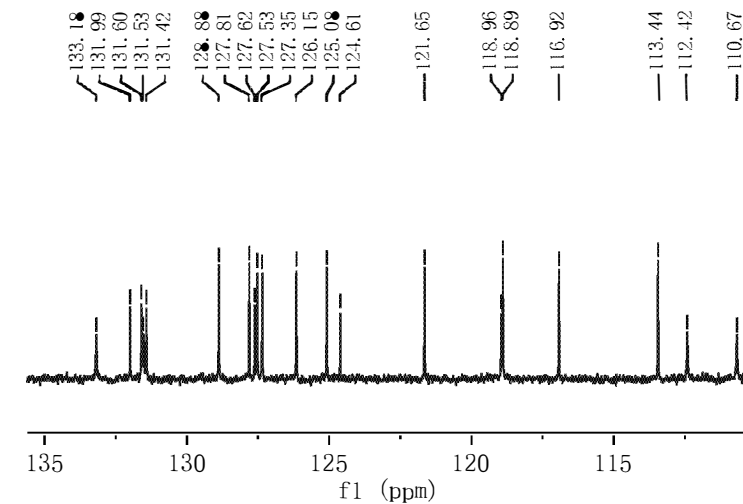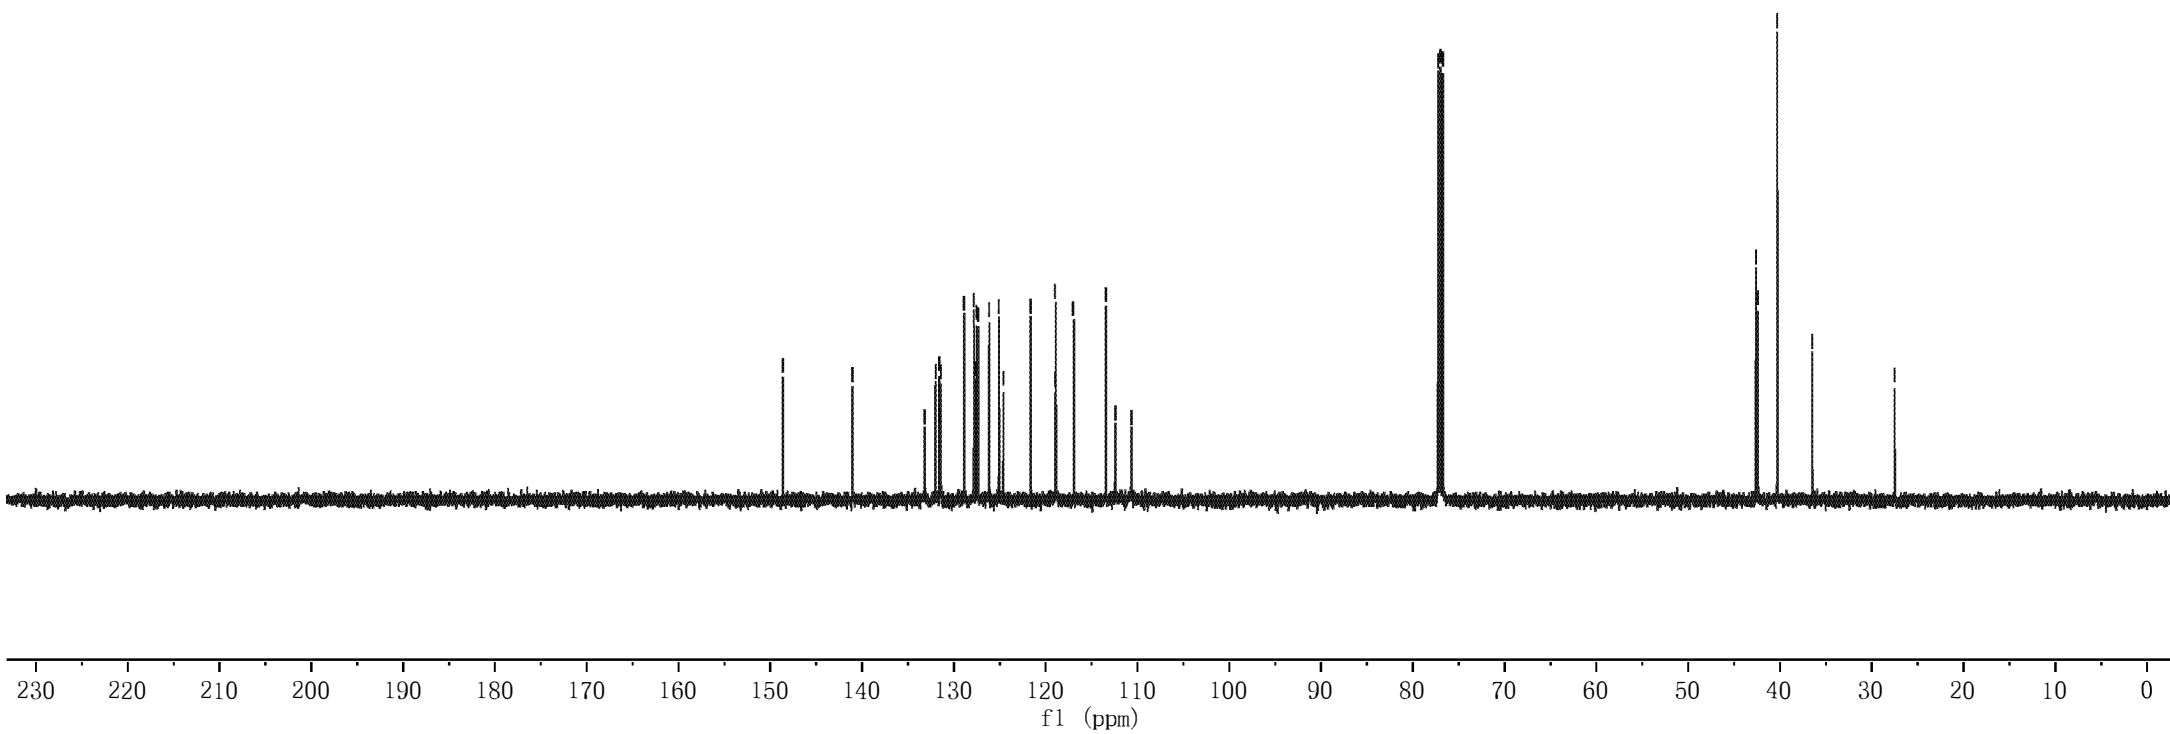

| Parameter                | Value               |
|--------------------------|---------------------|
| 1 Title                  | zyx-14-45-dept      |
| 2 Origin                 | Bruker BioSpin GmbH |
| 3 Solvent                | CDCl3               |
| 4 Temperature            | 299.1               |
| 5 Number of Scans        | 36                  |
| 6 Acquisition Time       | 1.1010              |
| 7 Acquisition Date       | 2024-08-12T11:38:48 |
| 8 Spectrometer Frequency | 125.77              |
| 9 Spectral Width         | 29761.9             |

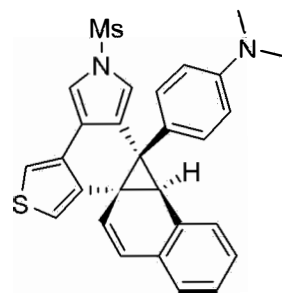

4ad

133.17  
131.52  
128.87  
127.80  
127.53  
127.35  
126.15  
125.08  
121.65  
118.89  
116.92  
113.44  
112.41  
110.67

77.20

42.64  
42.46  
40.32

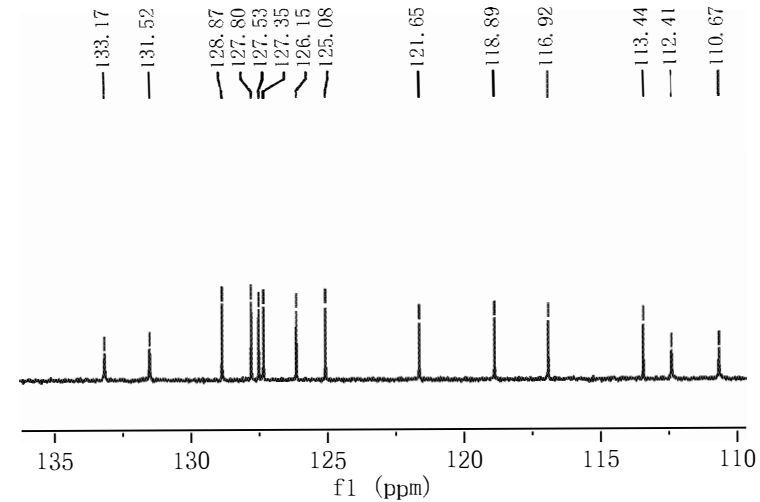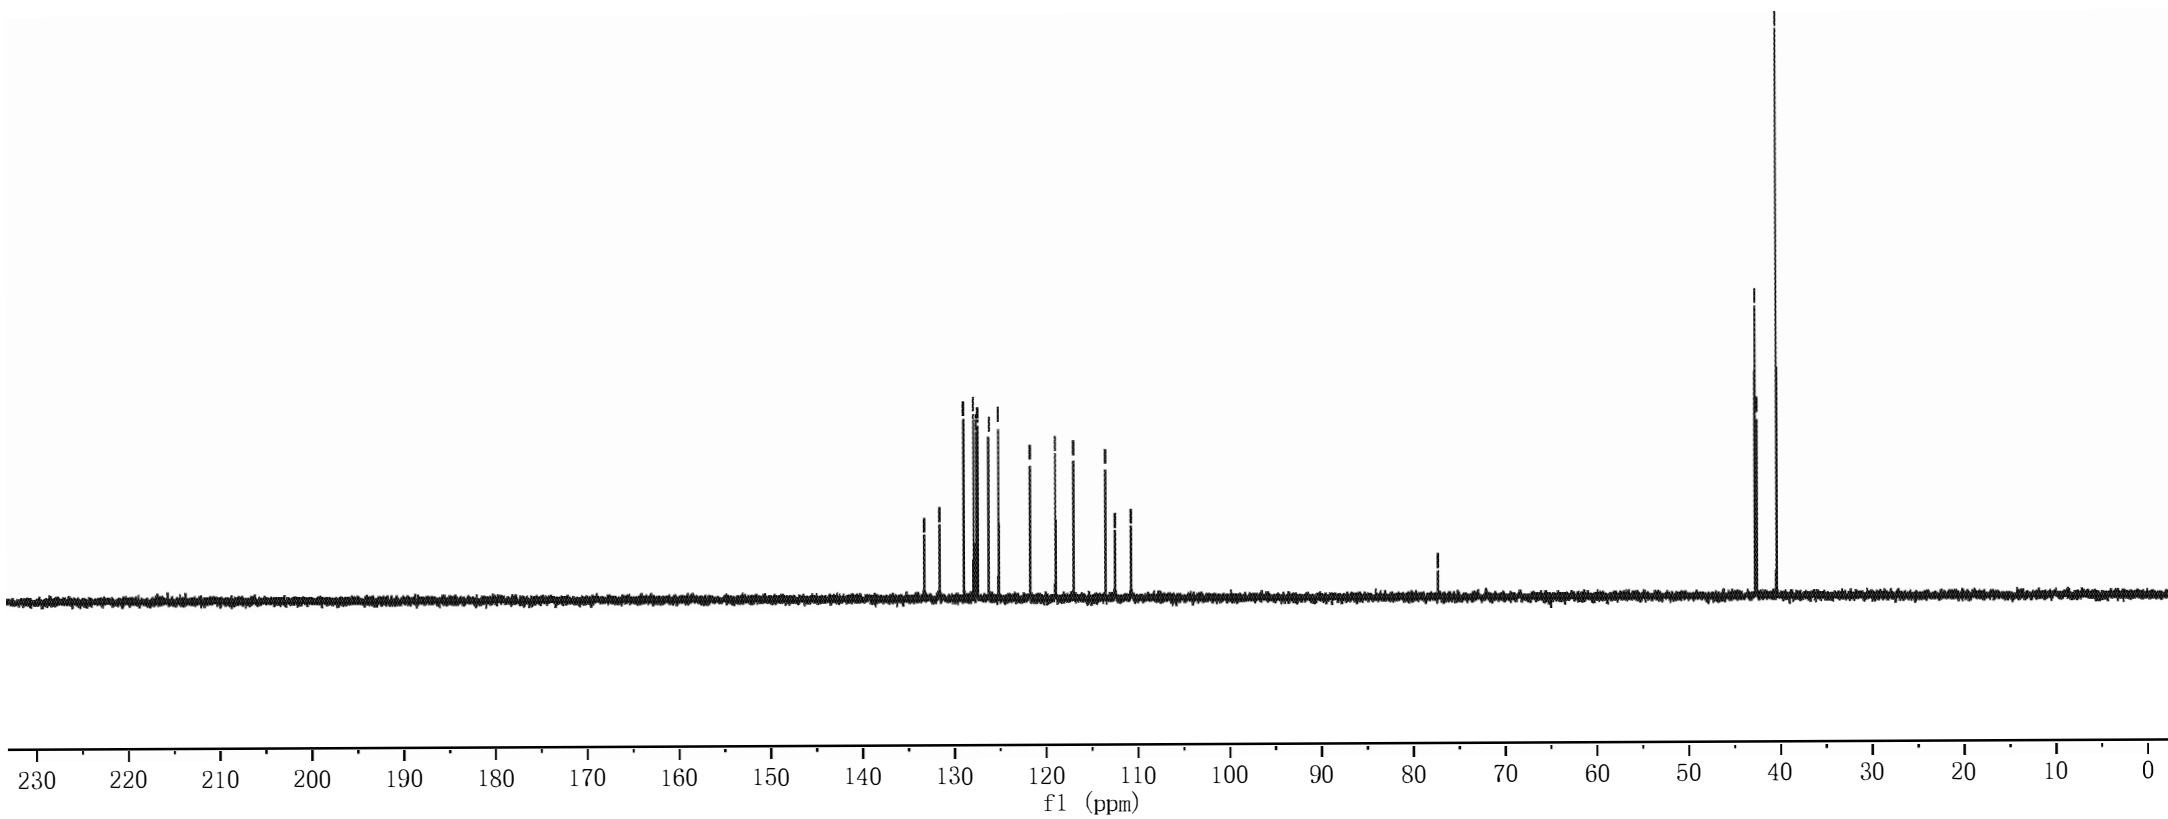

| Parameter                | Value               |
|--------------------------|---------------------|
| 1 Title                  | zyx-13-222          |
| 2 Origin                 |                     |
| 3 Solvent                | CDC13               |
| 4 Temperature            | 299.0               |
| 5 Number of Scans        | 16                  |
| 6 Acquisition Time       | 4.0002              |
| 7 Acquisition Date       | 2024-07-20T17:36:43 |
| 8 Spectrometer Frequency | 399.89              |
| 9 Spectral Width         | 8012.0              |

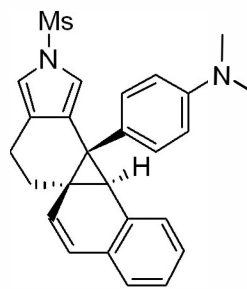

4ae

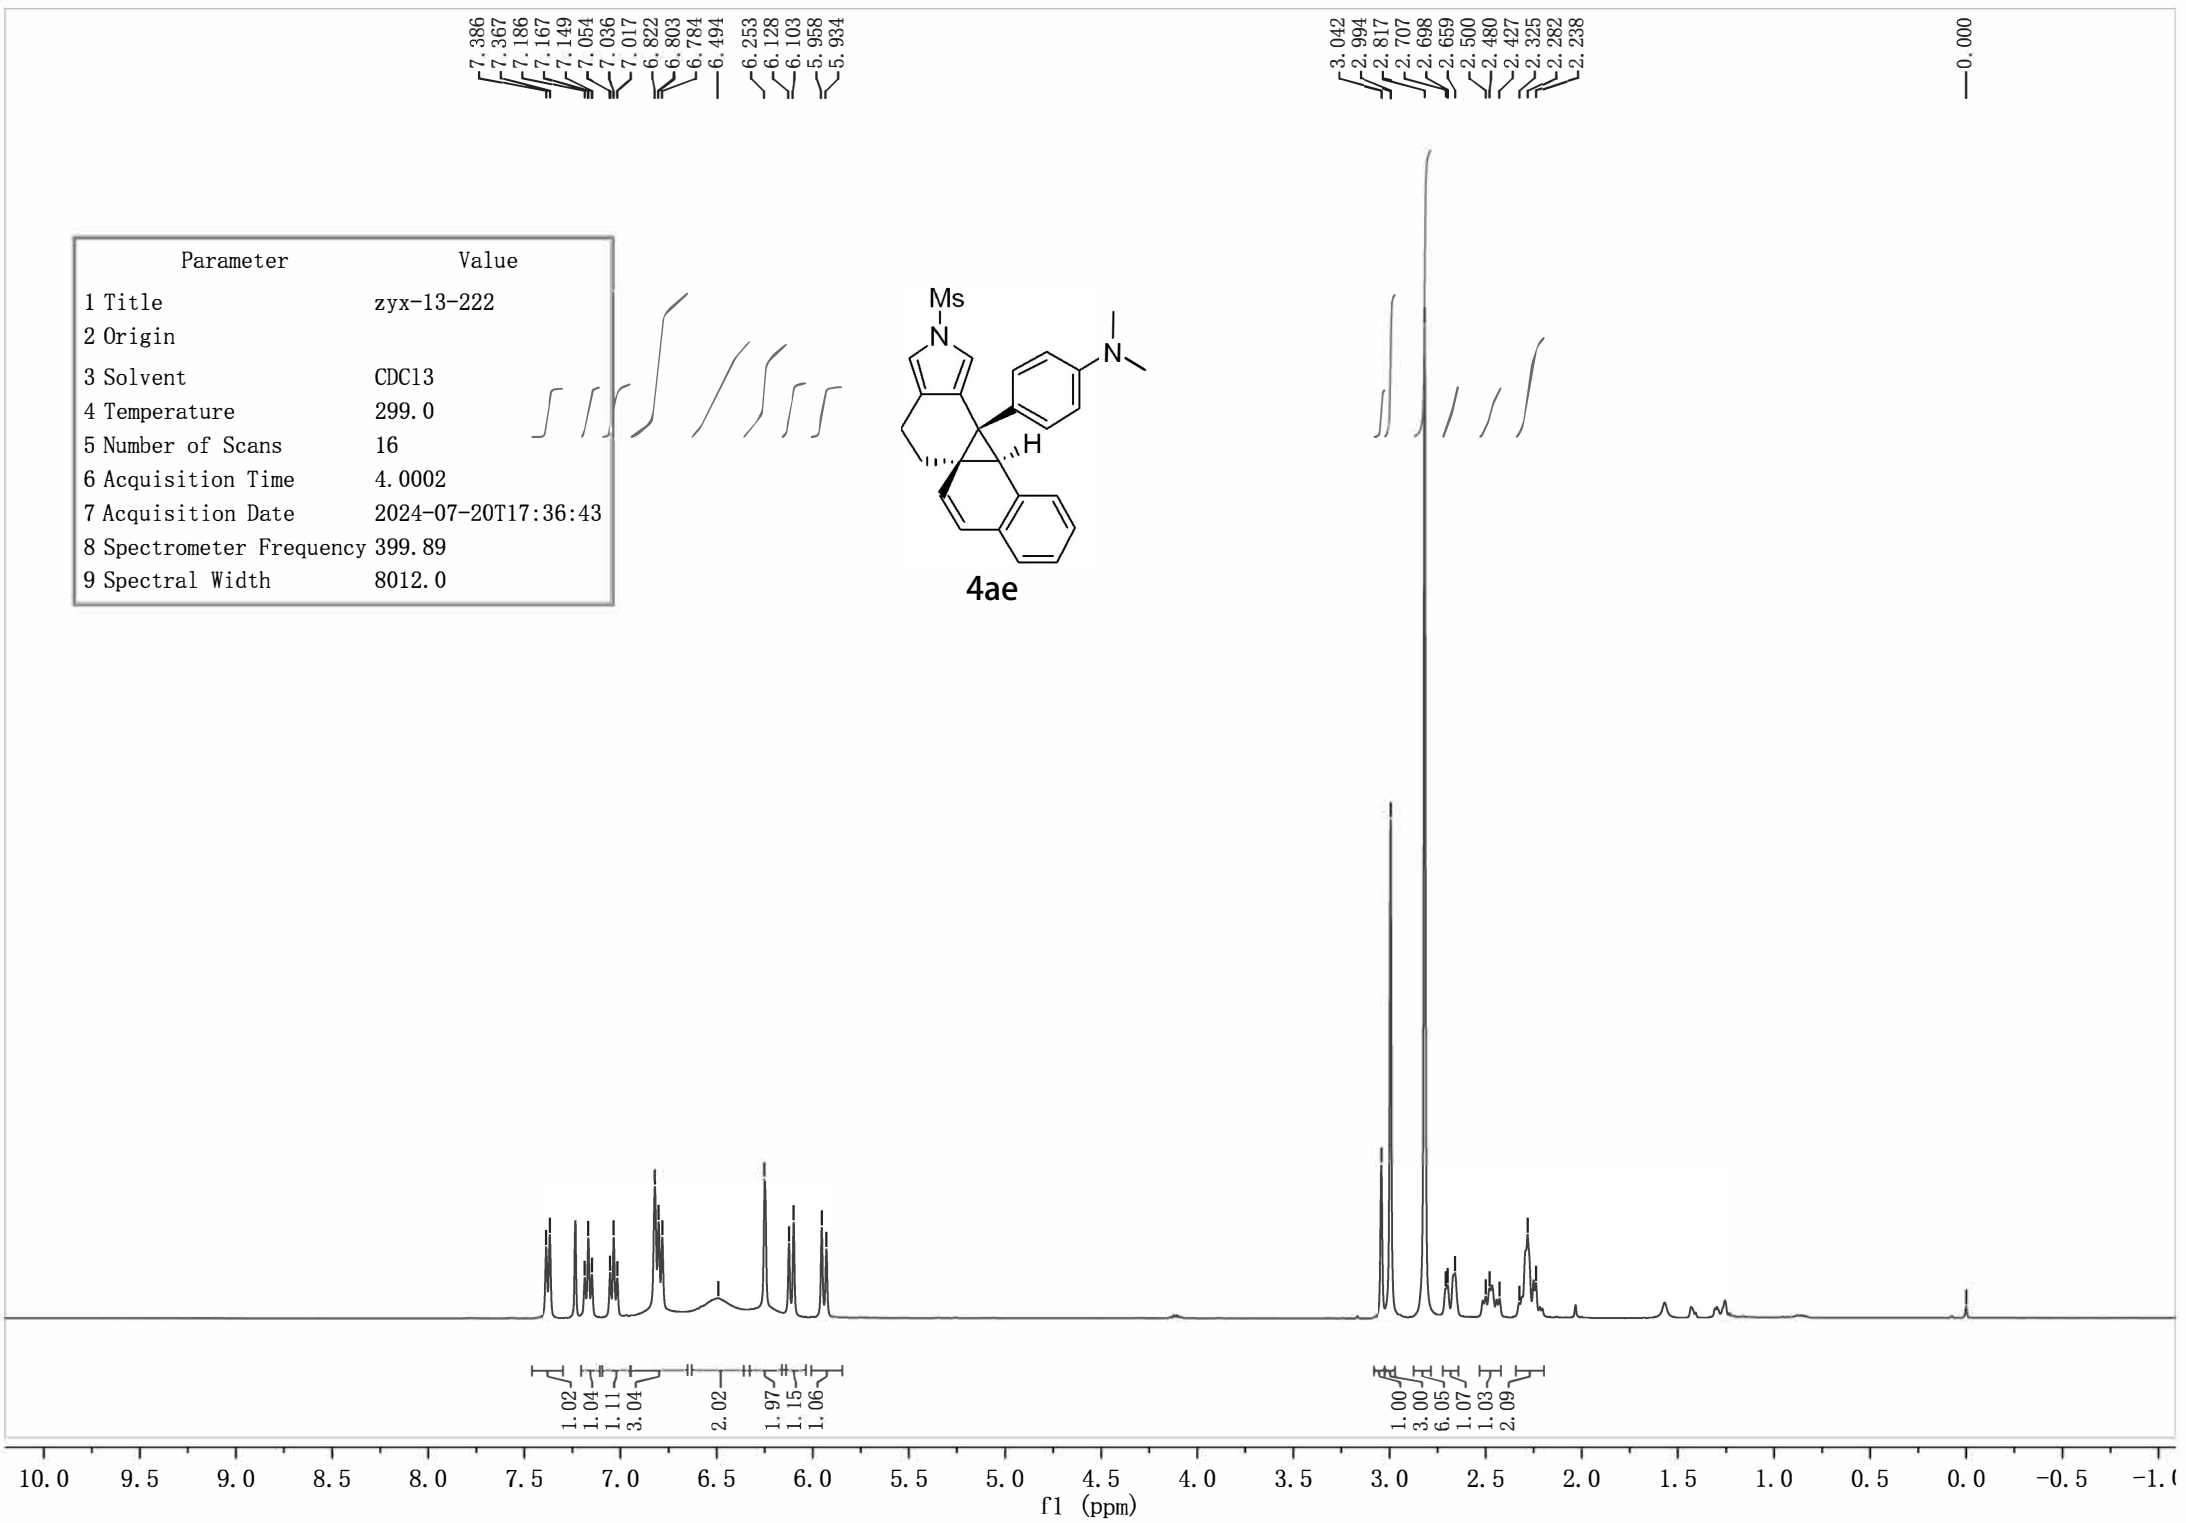

| Parameter                | Value               |
|--------------------------|---------------------|
| 1 Title                  | zyx-13-222-c        |
| 2 Origin                 | Bruker BioSpin GmbH |
| 3 Solvent                | CDCl3               |
| 4 Temperature            | 298.8               |
| 5 Number of Scans        | 40                  |
| 6 Acquisition Time       | 1.1010              |
| 7 Acquisition Date       | 2024-07-19T15:50:56 |
| 8 Spectrometer Frequency | 125.77              |
| 9 Spectral Width         | 29761.9             |

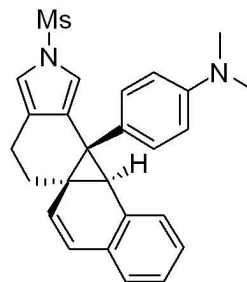

4ae

148.50  
 133.62  
 132.59  
 132.31  
 128.95  
 128.80  
 127.12  
 126.97  
 126.21  
 125.92  
 124.66  
 121.87  
 117.57  
 115.63

77.25  
 77.00  
 76.75

42.37  
 40.39  
 35.66  
 34.93

27.24  
 23.98

17.73

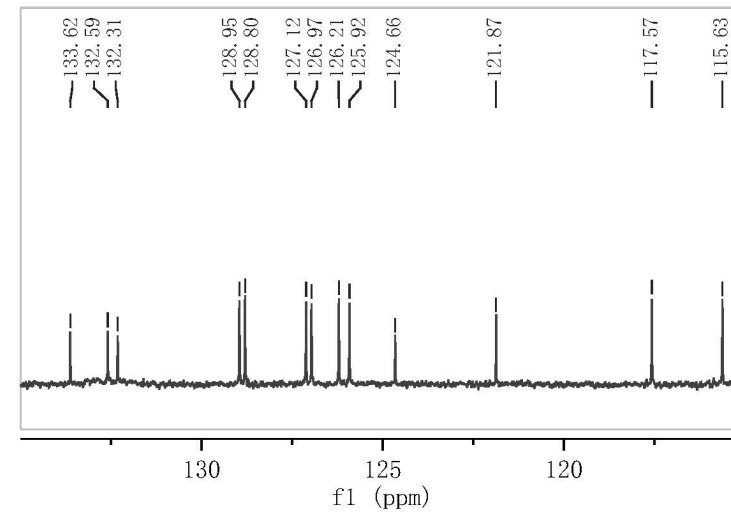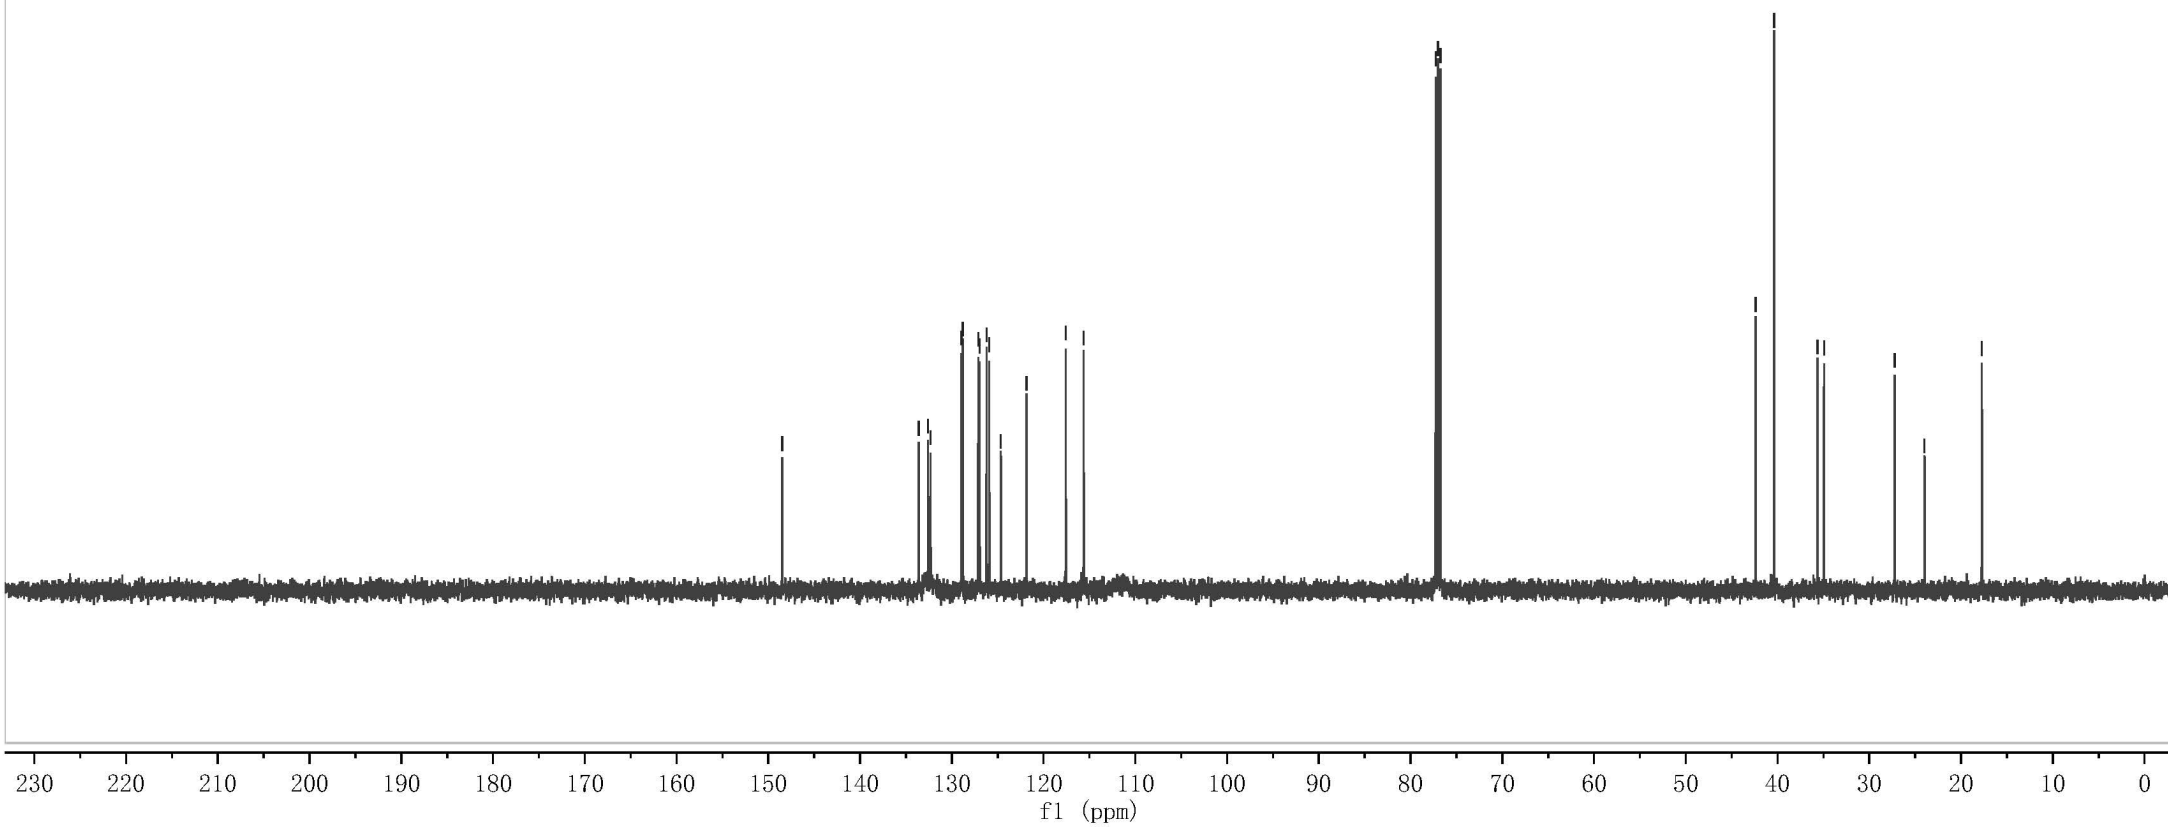

129.04  
128.89  
127.20  
127.05  
126.30  
126.01  
117.66  
115.71

2.46  
40.47  
35.01  
27.32  
17.81

| Parameter                | Value               |
|--------------------------|---------------------|
| 1 Title                  | zyx-13-222-dept     |
| 2 Origin                 | Bruker BioSpin GmbH |
| 3 Solvent                | CDCl3               |
| 4 Temperature            | 299.0               |
| 5 Number of Scans        | 42                  |
| 6 Acquisition Time       | 1.1010              |
| 7 Acquisition Date       | 2024-07-19T15:53:19 |
| 8 Spectrometer Frequency | 125.77              |
| 9 Spectral Width         | 29761.9             |

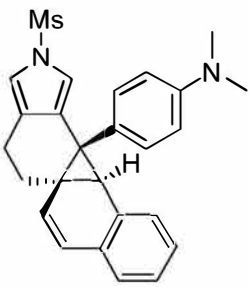

4ae

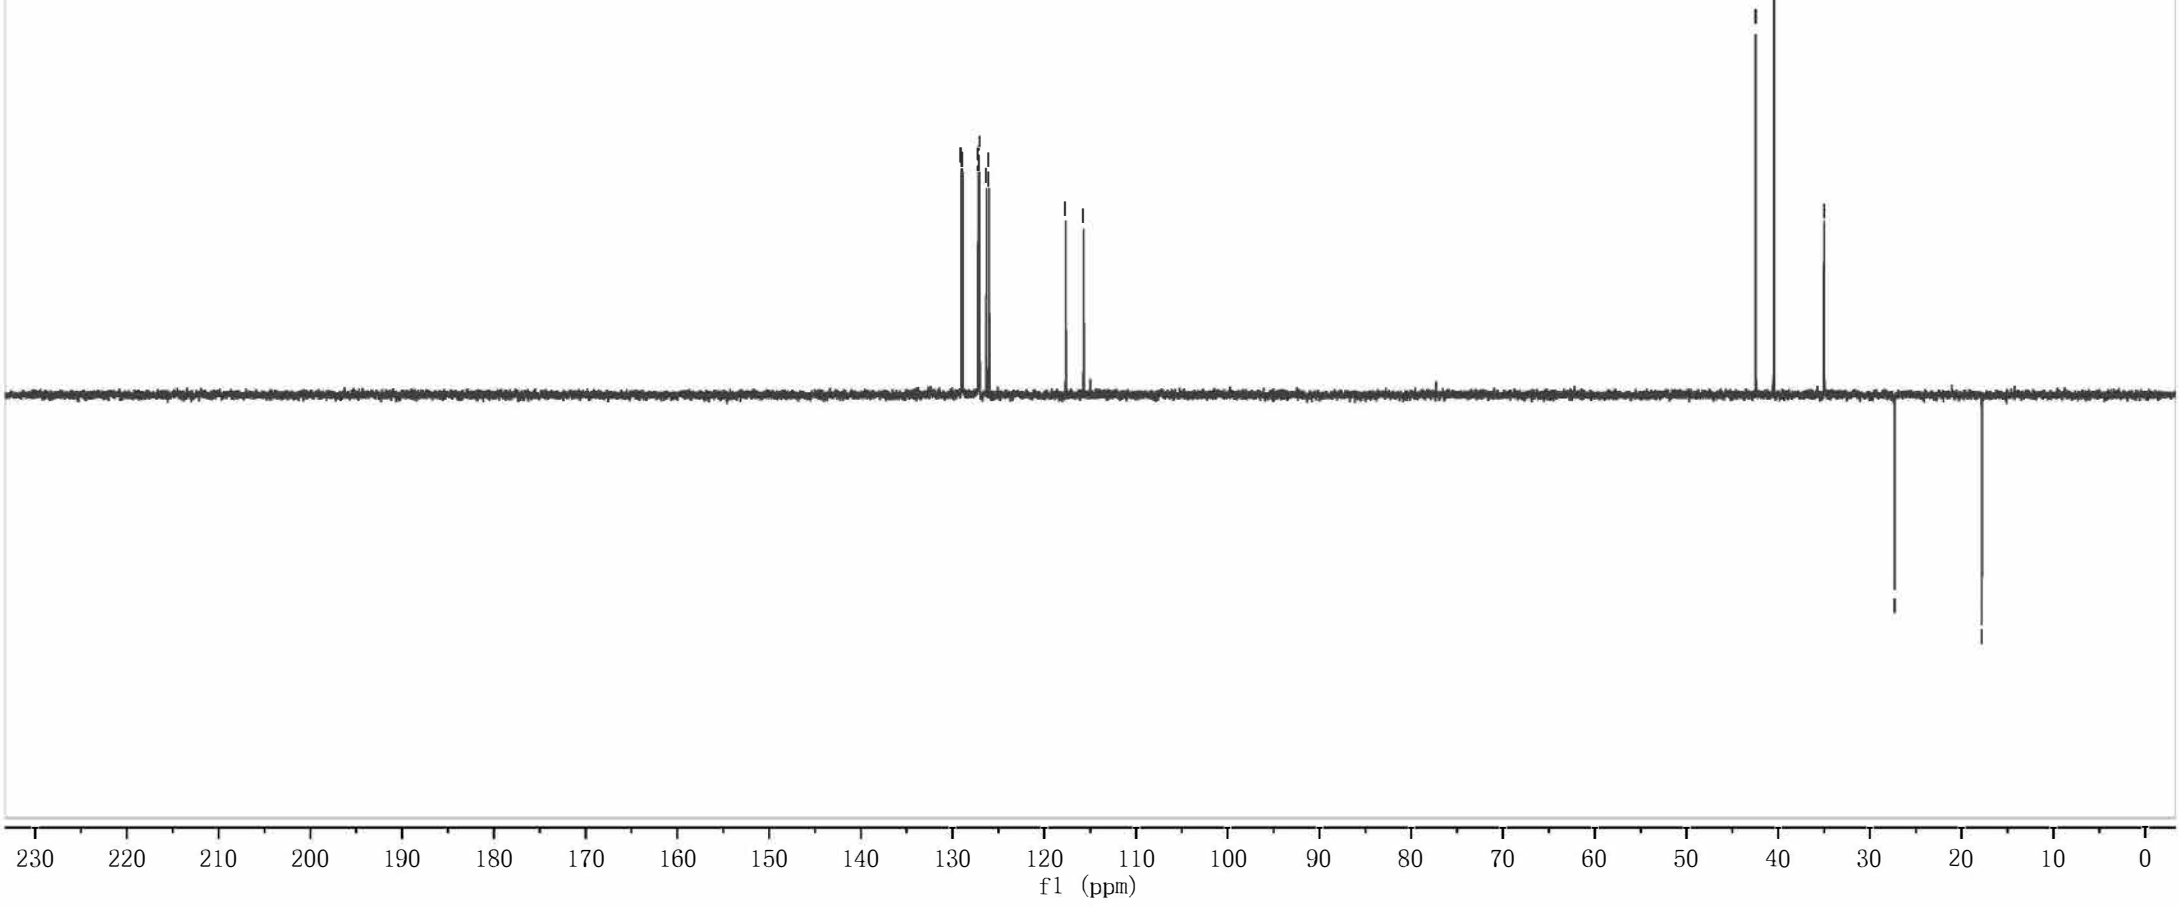



| Parameter                | Value               |
|--------------------------|---------------------|
| 1 Title                  | ZYX-13-236-H        |
| 2 Origin                 | Bruker BioSpin GmbH |
| 3 Solvent                | CDCl3               |
| 4 Temperature            | 298.0               |
| 5 Number of Scans        | 3                   |
| 6 Acquisition Time       | 4.0894              |
| 7 Acquisition Date       | 2024-07-27T22:13:02 |
| 8 Spectrometer Frequency | 400.13              |
| 9 Spectral Width         | 8012.8              |

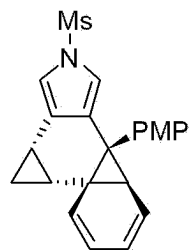

4aj

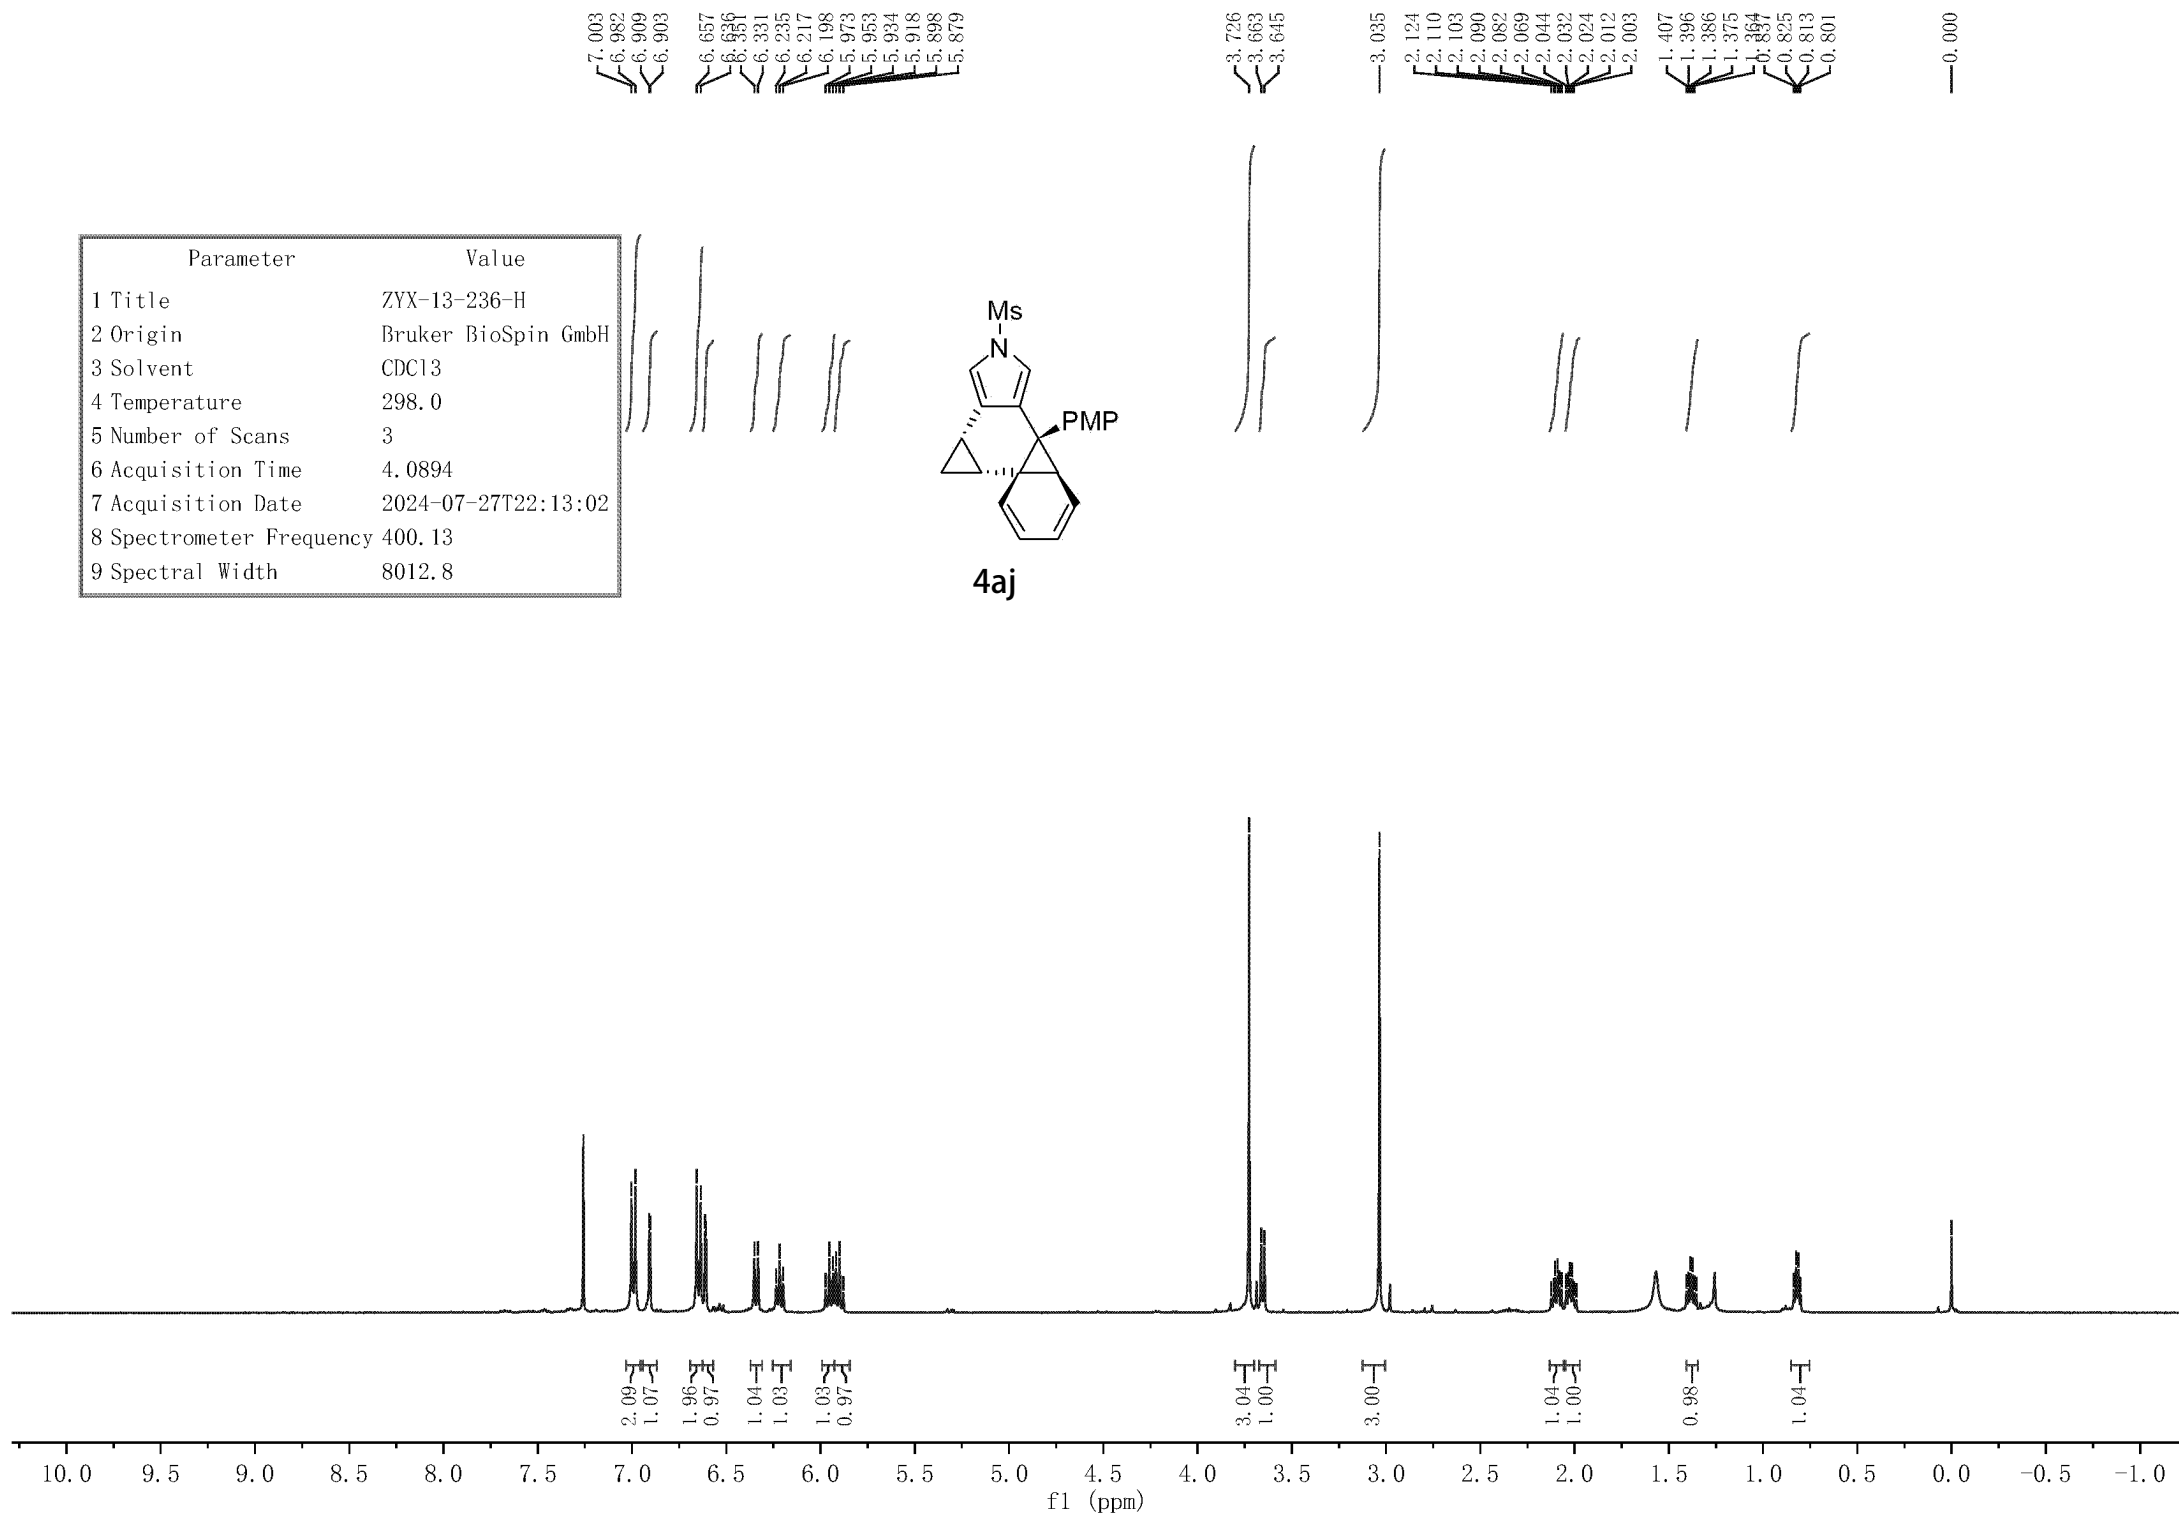

| Parameter                | Value               |
|--------------------------|---------------------|
| 1 Title                  | zyx-13-236-c        |
| 2 Origin                 |                     |
| 3 Solvent                | CDC13               |
| 4 Temperature            | 299.6               |
| 5 Number of Scans        | 4000                |
| 6 Acquisition Time       | 1.0000              |
| 7 Acquisition Date       | 2024-07-28T19:31:59 |
| 8 Spectrometer Frequency | 100.55              |
| 9 Spectral Width         | 26041.0             |

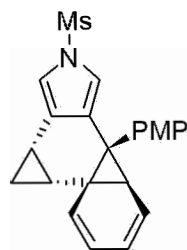

4aj

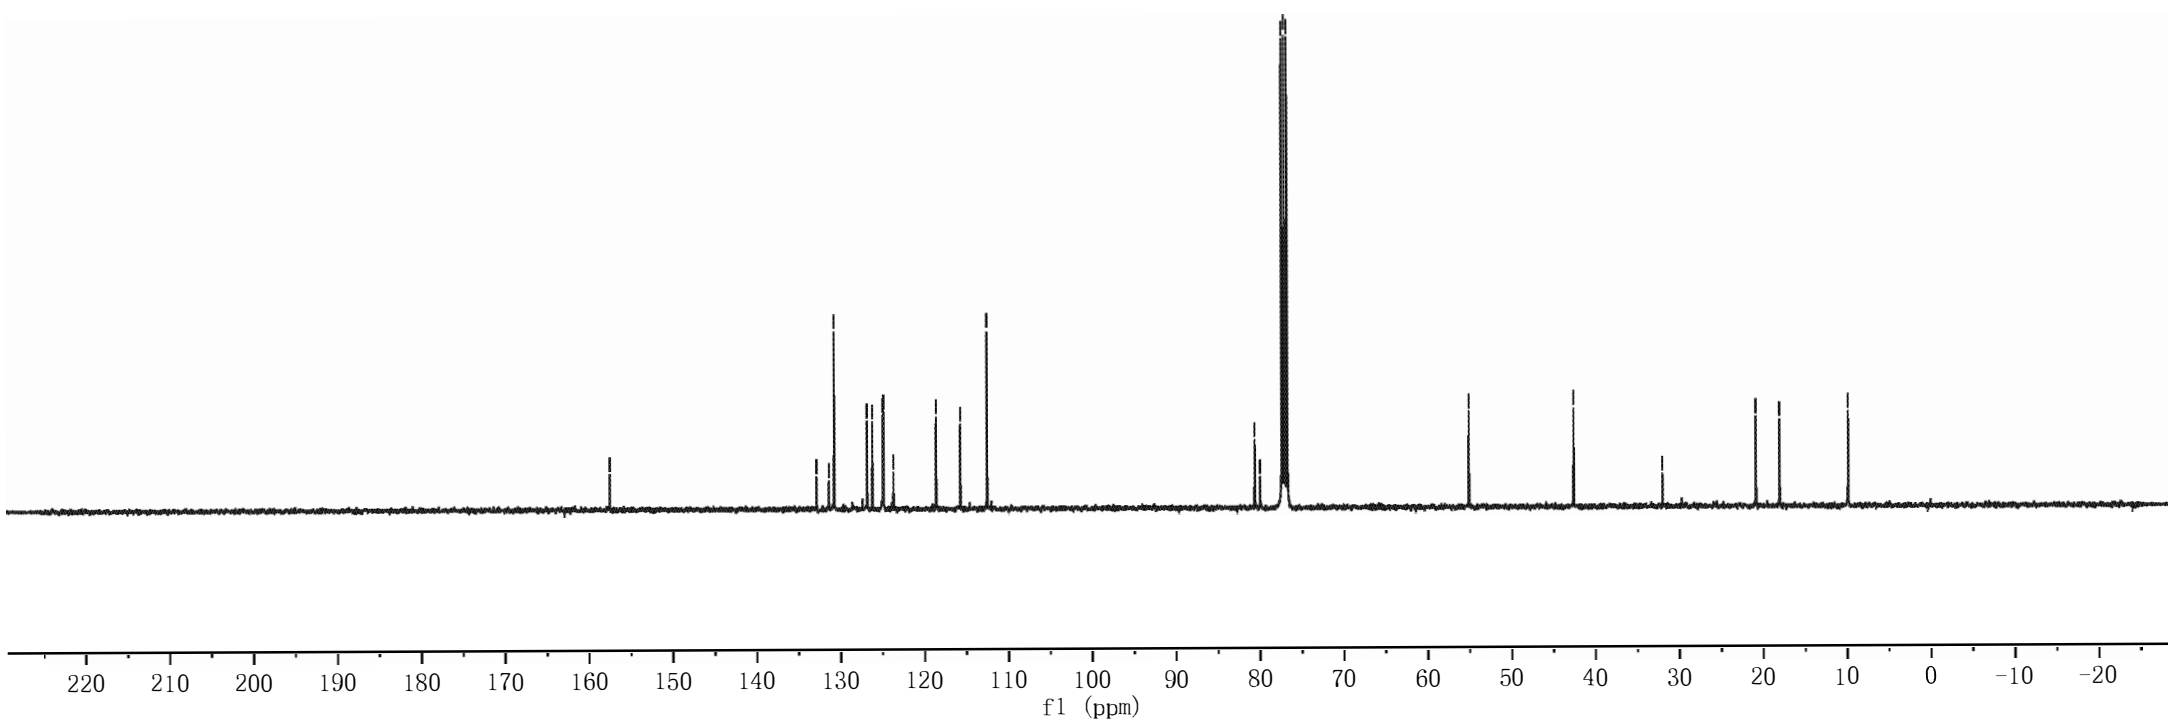

130.71  
126.79  
126.15  
124.90  
124.81  
118.56  
115.67  
112.48

80.56  
77.20

55.02

42.53

20.79  
17.98

9.80

| Parameter                | Value               |
|--------------------------|---------------------|
| 1 Title                  | zyx-13-236          |
| 2 Origin                 |                     |
| 3 Solvent                | CDC13               |
| 4 Temperature            | 300.1               |
| 5 Number of Scans        | 2000                |
| 6 Acquisition Time       | 1.0001              |
| 7 Acquisition Date       | 2024-07-28T06:27:42 |
| 8 Spectrometer Frequency | 100.55              |
| 9 Spectral Width         | 18028.0             |

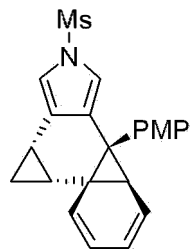

4aj

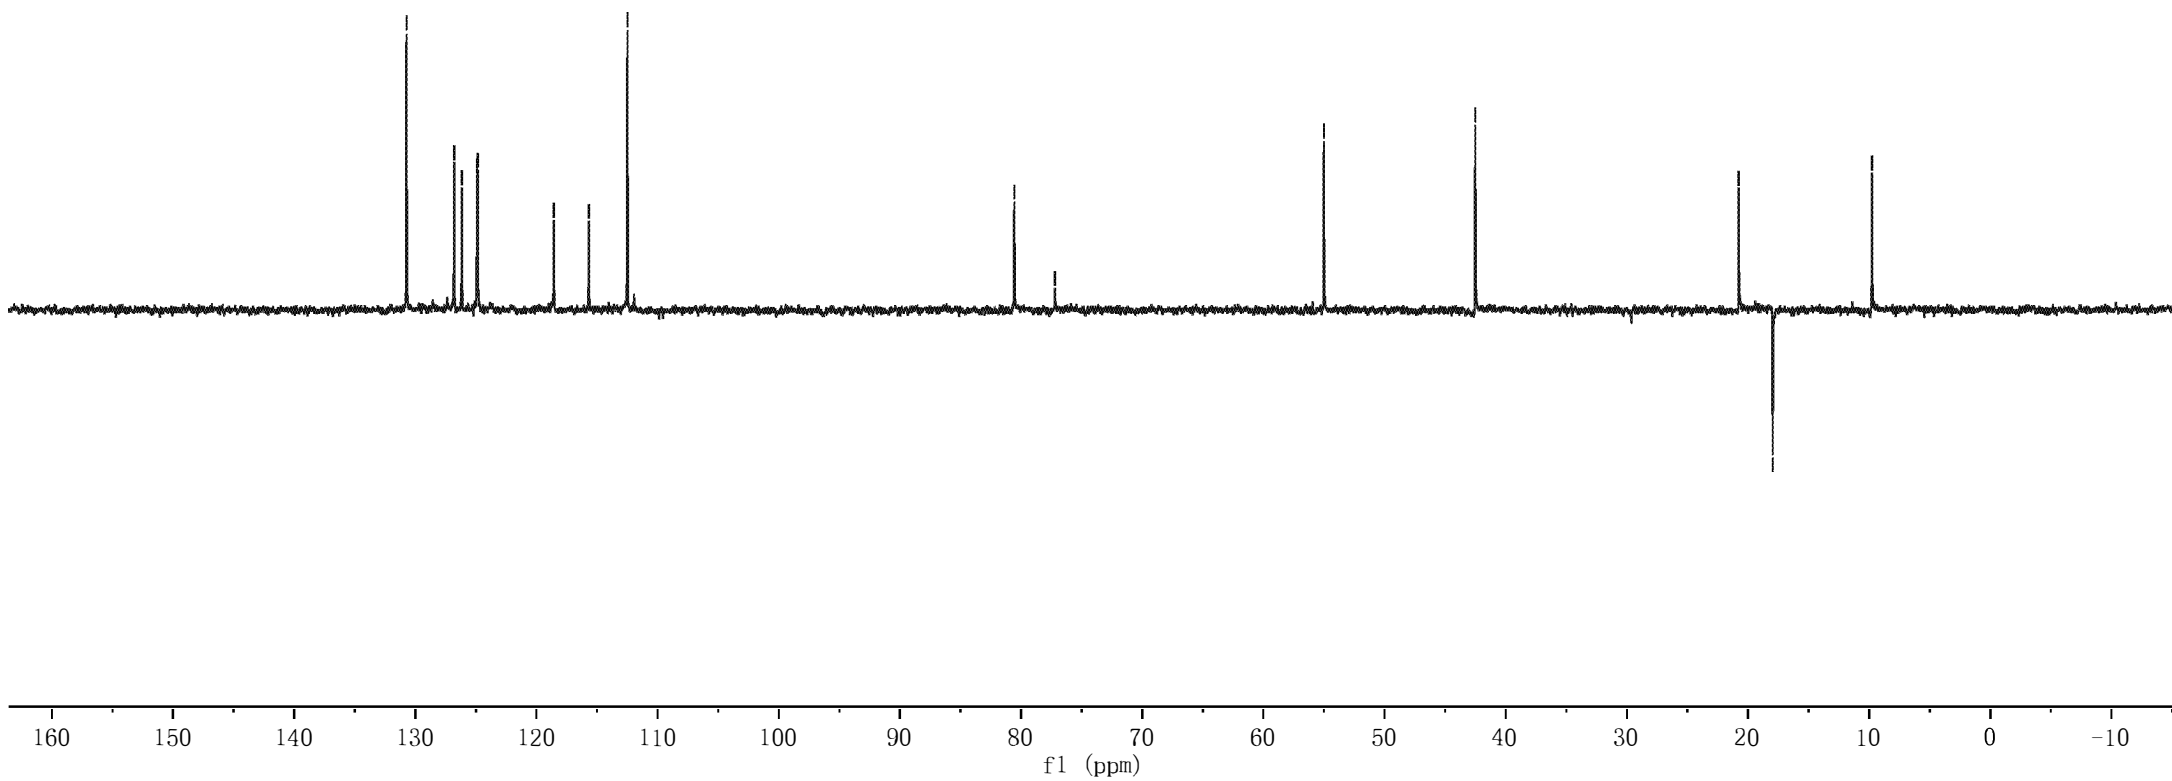

| Parameter                | Value               |
|--------------------------|---------------------|
| 1 Title                  | ZYX-6-74            |
| 2 Origin                 |                     |
| 3 Solvent                | CDC13               |
| 4 Temperature            | 299.9               |
| 5 Number of Scans        | 25                  |
| 6 Acquisition Time       | 4.0002              |
| 7 Acquisition Date       | 2022-08-20T13:22:52 |
| 8 Spectrometer Frequency | 399.92              |
| 9 Spectral Width         | 8012.0              |

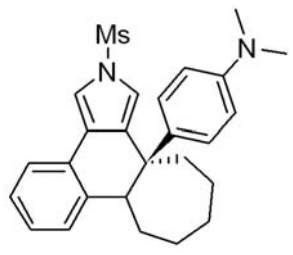

5a

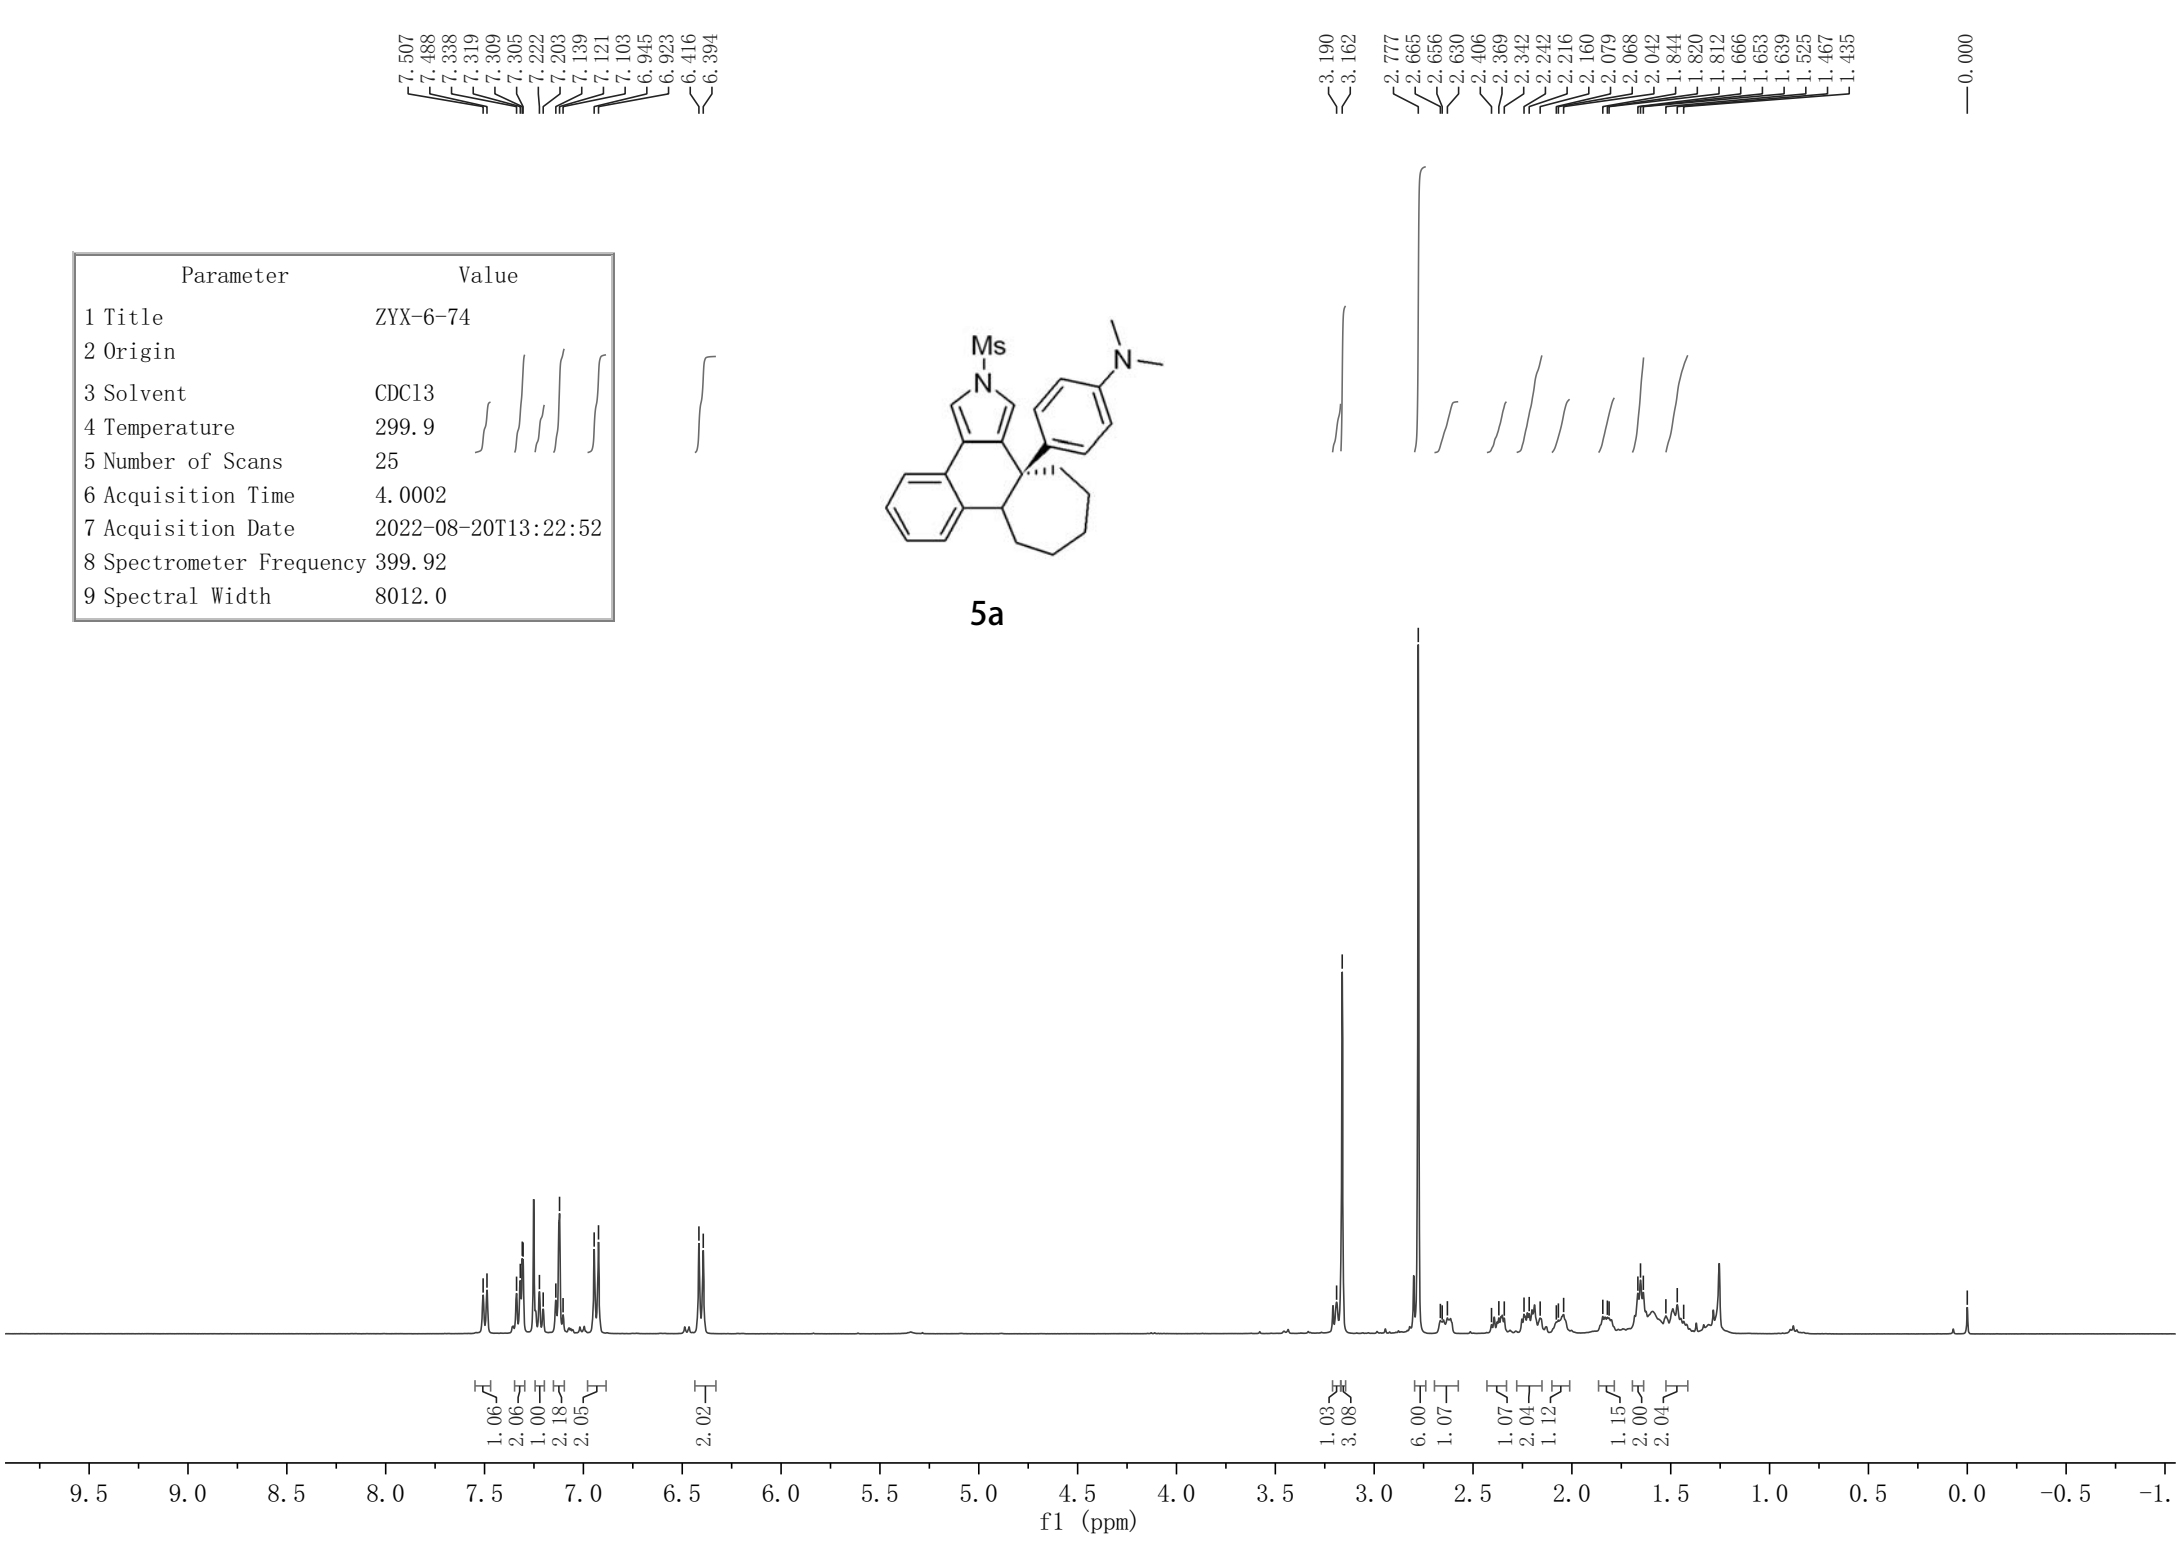

| Parameter                | Value               |
|--------------------------|---------------------|
| 1 Title                  | ZYX-6-74            |
| 2 Origin                 |                     |
| 3 Solvent                | CDC13               |
| 4 Temperature            | 299.8               |
| 5 Number of Scans        | 700                 |
| 6 Acquisition Time       | 1.0000              |
| 7 Acquisition Date       | 2022-08-20T13:48:52 |
| 8 Spectrometer Frequency | 100.56              |
| 9 Spectral Width         | 26041.0             |

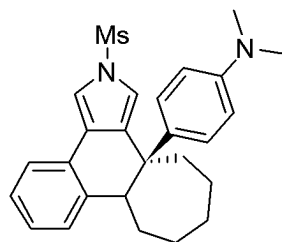

5a

148.00  
140.42  
137.13  
132.07  
129.74  
128.58  
127.15  
126.22  
125.71  
124.96  
123.47  
114.65  
113.95  
111.75

77.32  
77.00  
76.68

49.55  
45.32  
42.63  
40.38  
39.29

28.54  
28.39  
25.98  
22.45

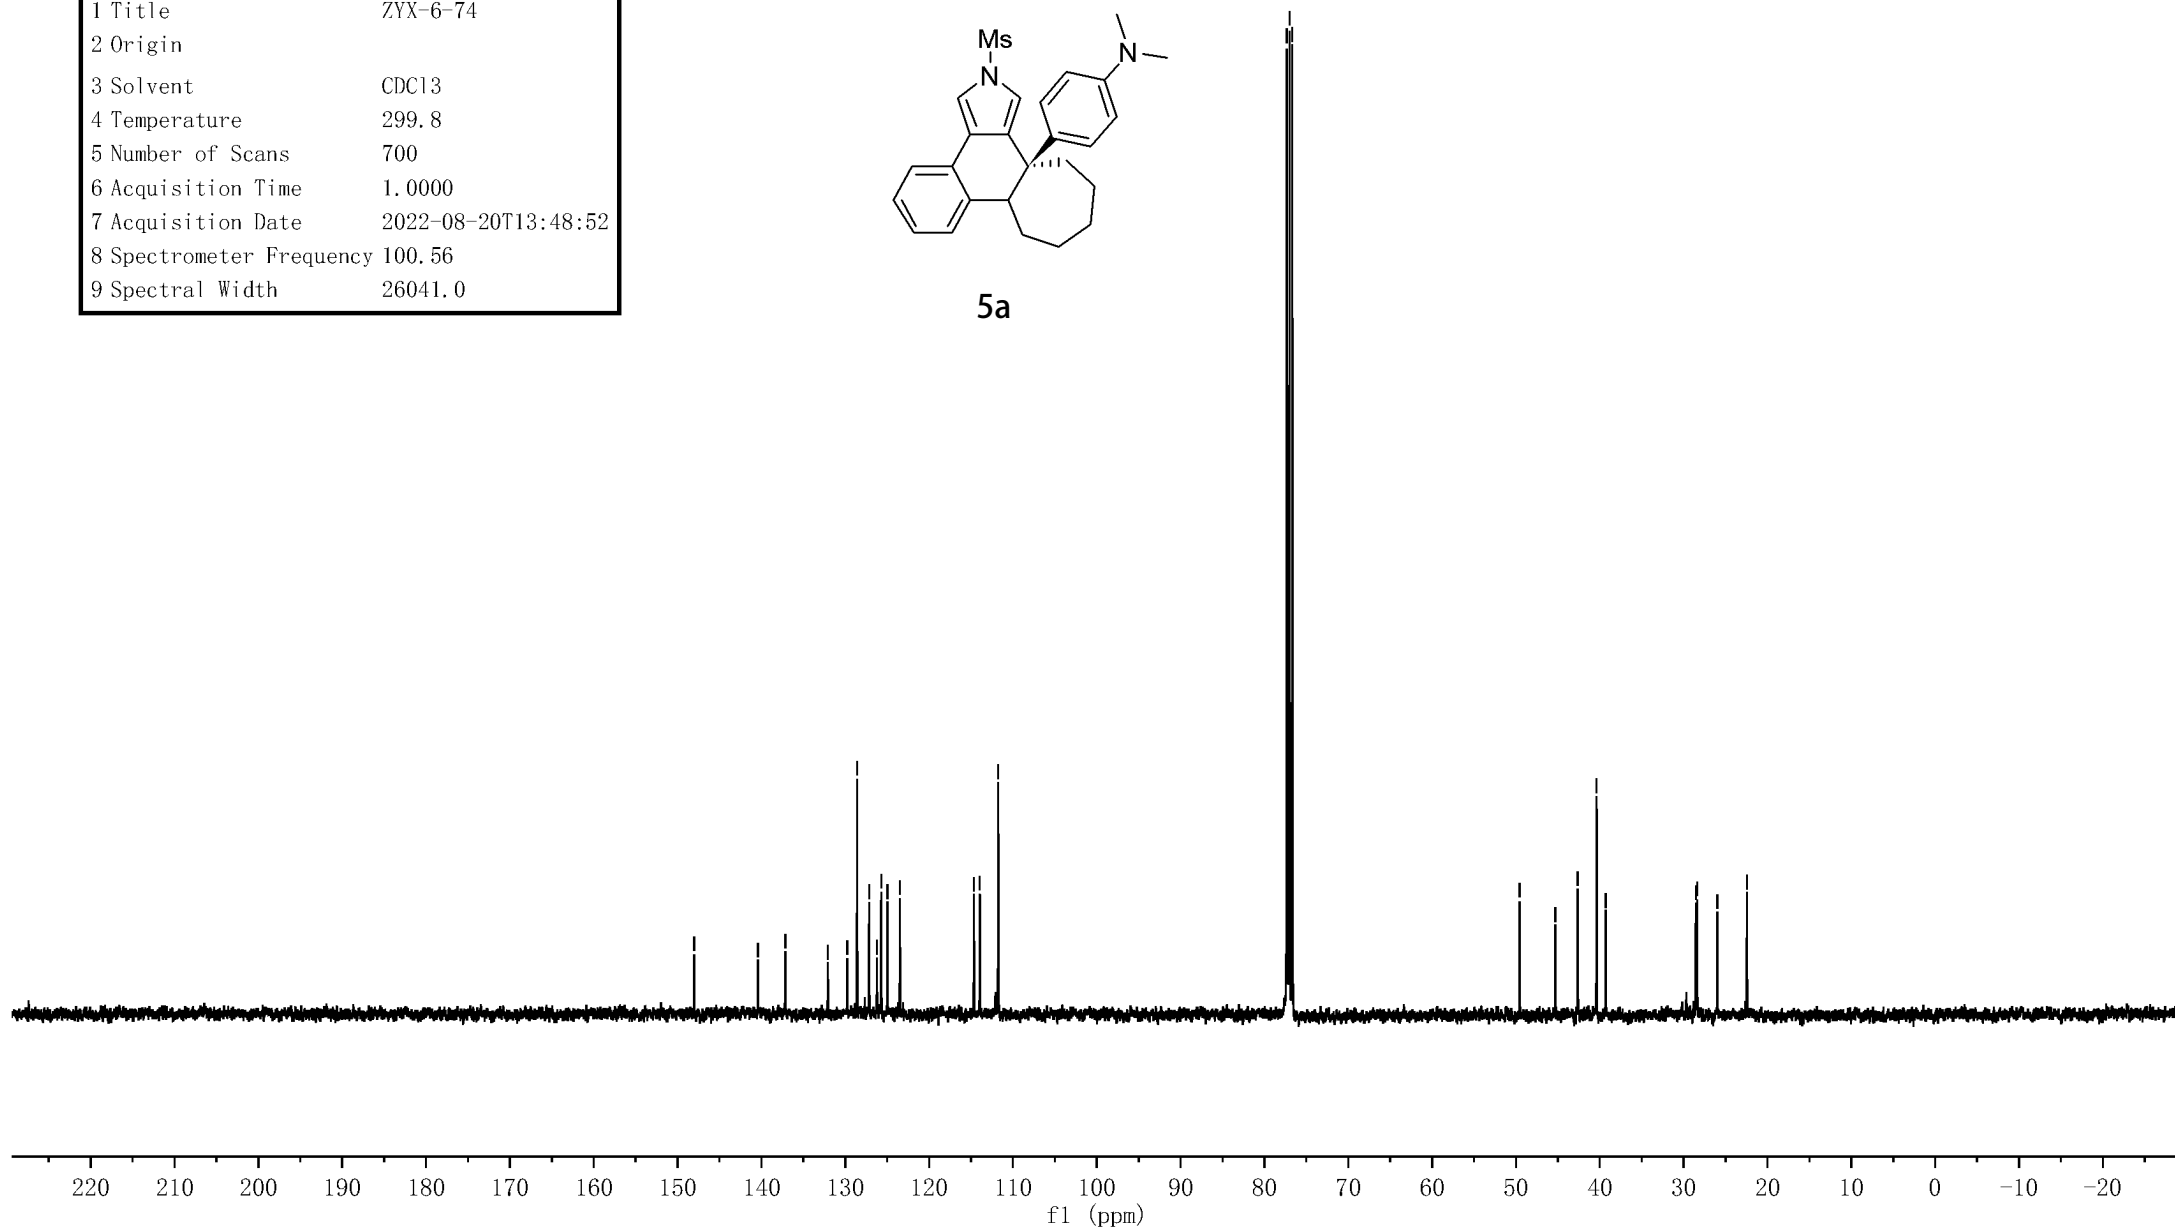

| Parameter                | Value               |
|--------------------------|---------------------|
| 1 Title                  | zyx-6-74--dept      |
| 2 Origin                 | Bruker BioSpin GmbH |
| 3 Solvent                | CDCl3               |
| 4 Temperature            | 300.0               |
| 5 Number of Scans        | 73                  |
| 6 Acquisition Time       | 1.2976              |
| 7 Acquisition Date       | 2022-08-20T16:44:45 |
| 8 Spectrometer Frequency | 100.61              |
| 9 Spectral Width         | 25252.5             |

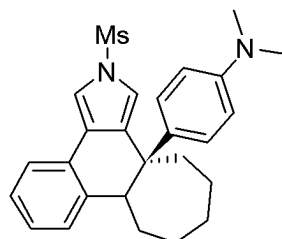

5a

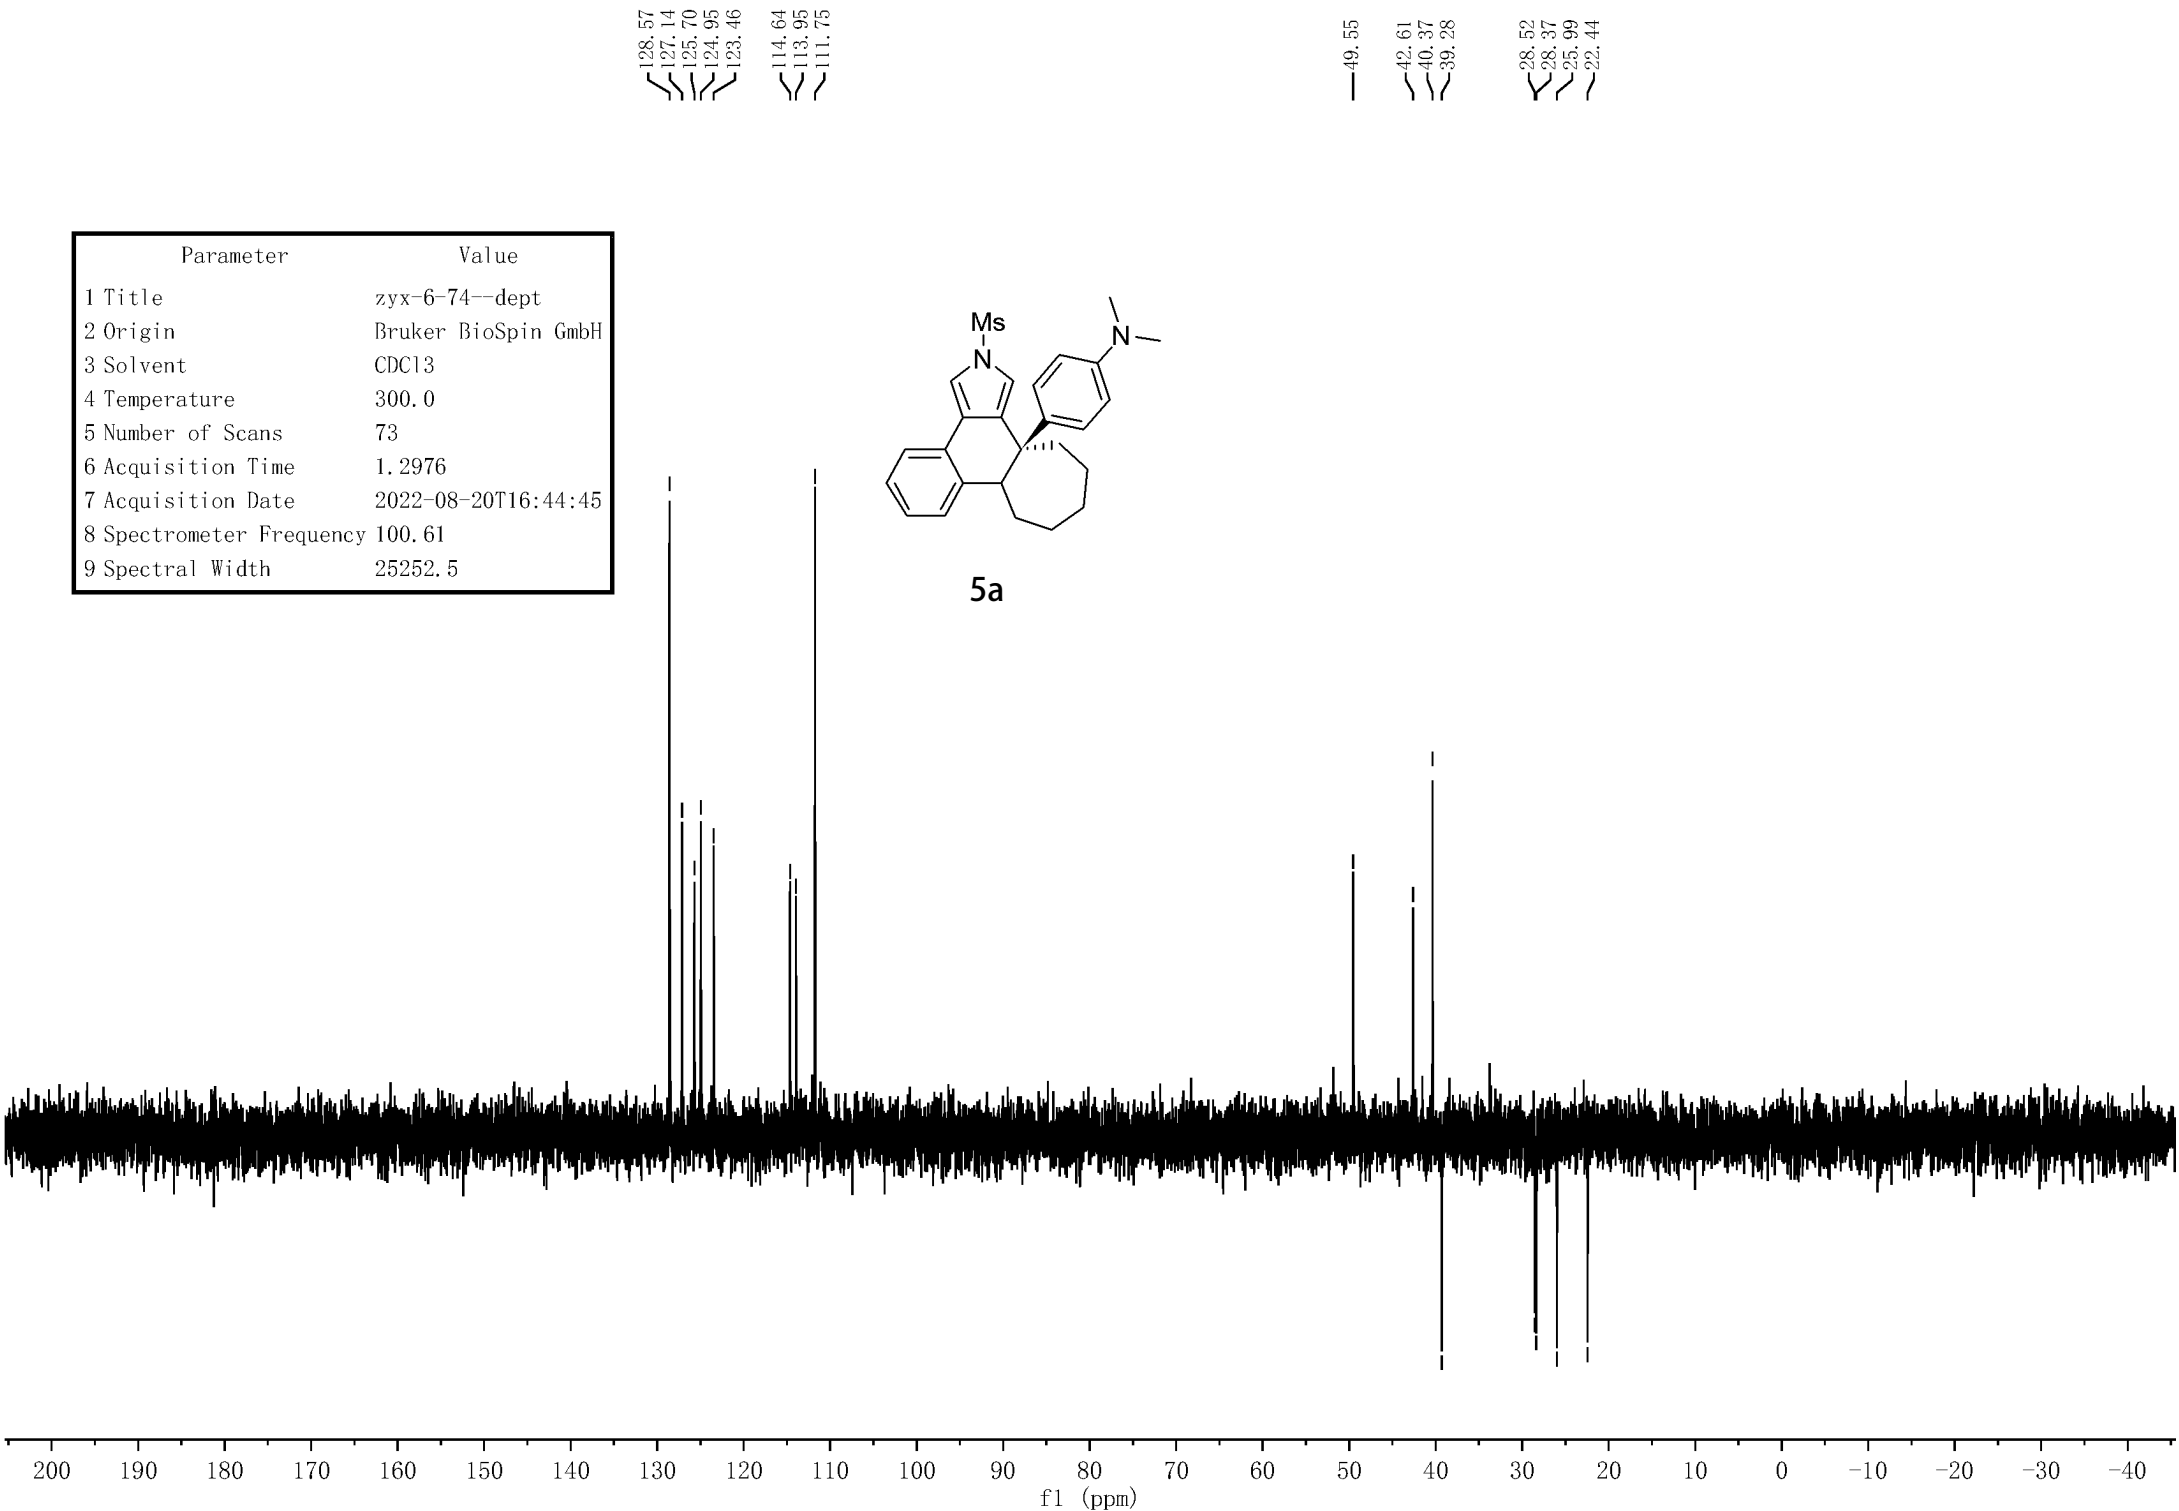

| Parameter                | Value               |
|--------------------------|---------------------|
| 1 Title                  | ZYX-10-206          |
| 2 Origin                 | Bruker BioSpin GmbH |
| 3 Solvent                | CDCl3               |
| 4 Temperature            | 298.0               |
| 5 Number of Scans        | 3                   |
| 6 Acquisition Time       | 4.0894              |
| 7 Acquisition Date       | 2023-10-04T16:42:32 |
| 8 Spectrometer Frequency | 400.13              |
| 9 Spectral Width         | 8012.8              |

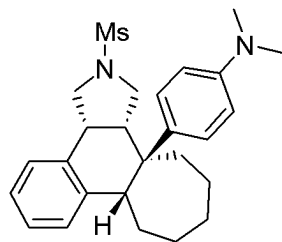

5b

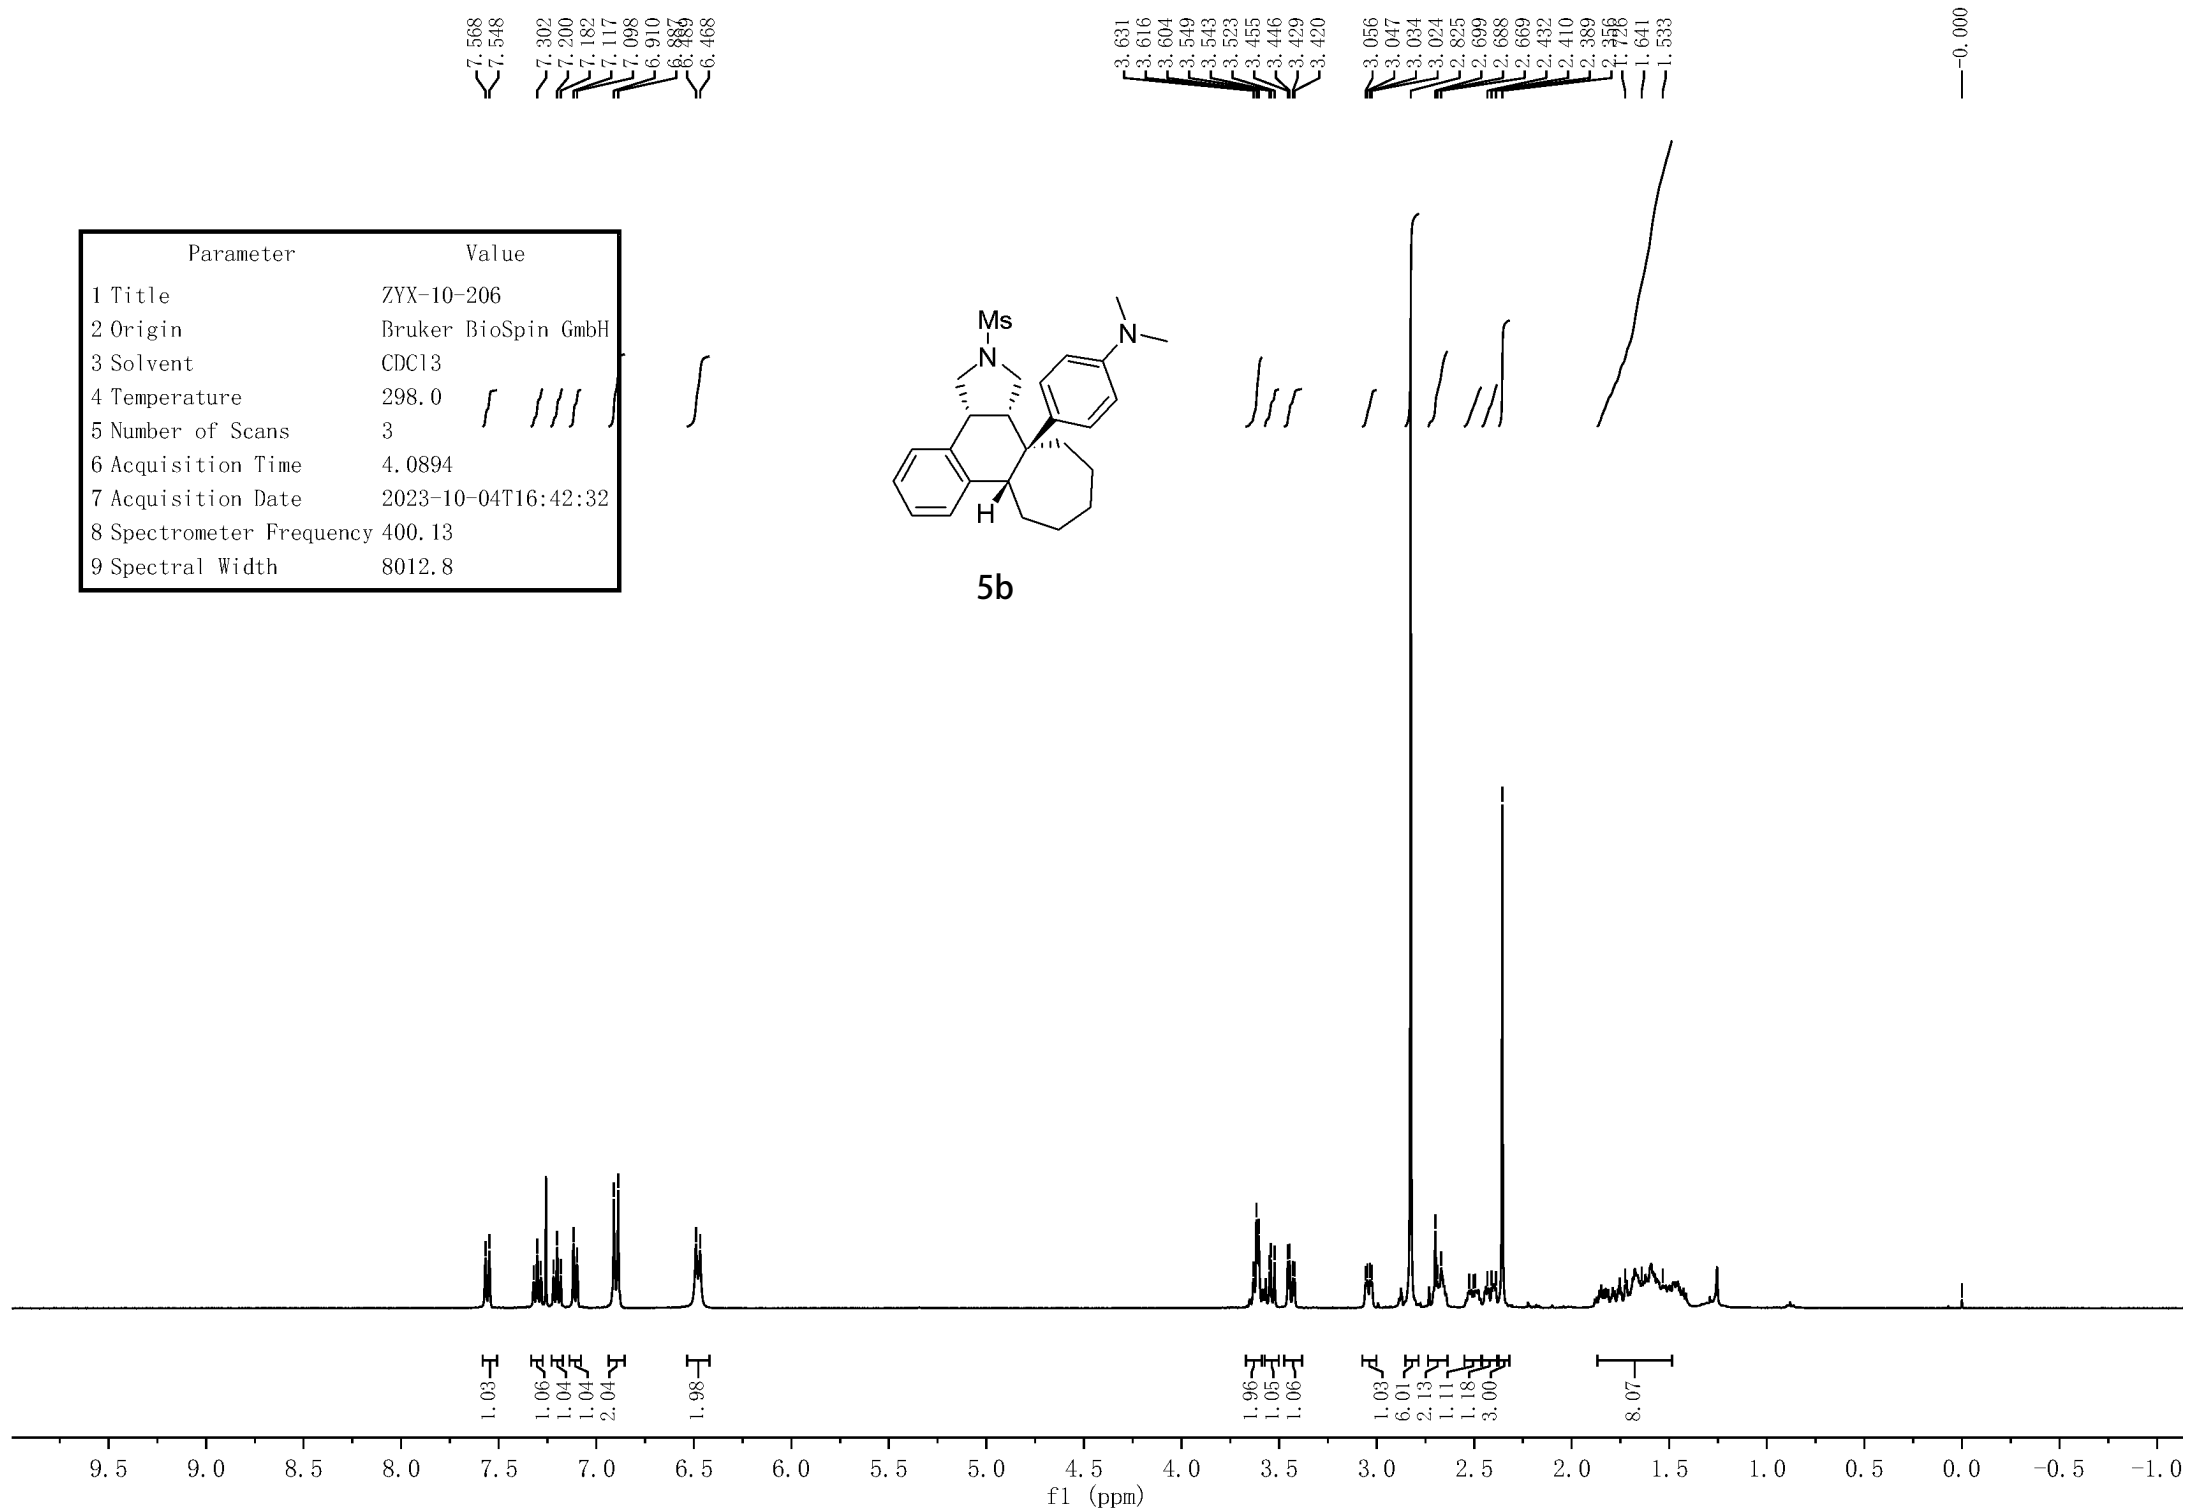

| Parameter                | Value               |
|--------------------------|---------------------|
| 1 Title                  | ZYX-10-206          |
| 2 Origin                 | Bruker BioSpin GmbH |
| 3 Solvent                | CDCl3               |
| 4 Temperature            | 300.0               |
| 5 Number of Scans        | 166                 |
| 6 Acquisition Time       | 1.3631              |
| 7 Acquisition Date       | 2023-10-04T16:43:10 |
| 8 Spectrometer Frequency | 100.61              |
| 9 Spectral Width         | 24038.5             |

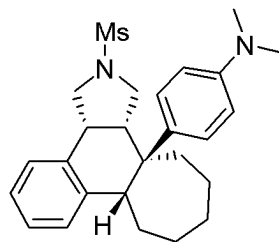

**5b**

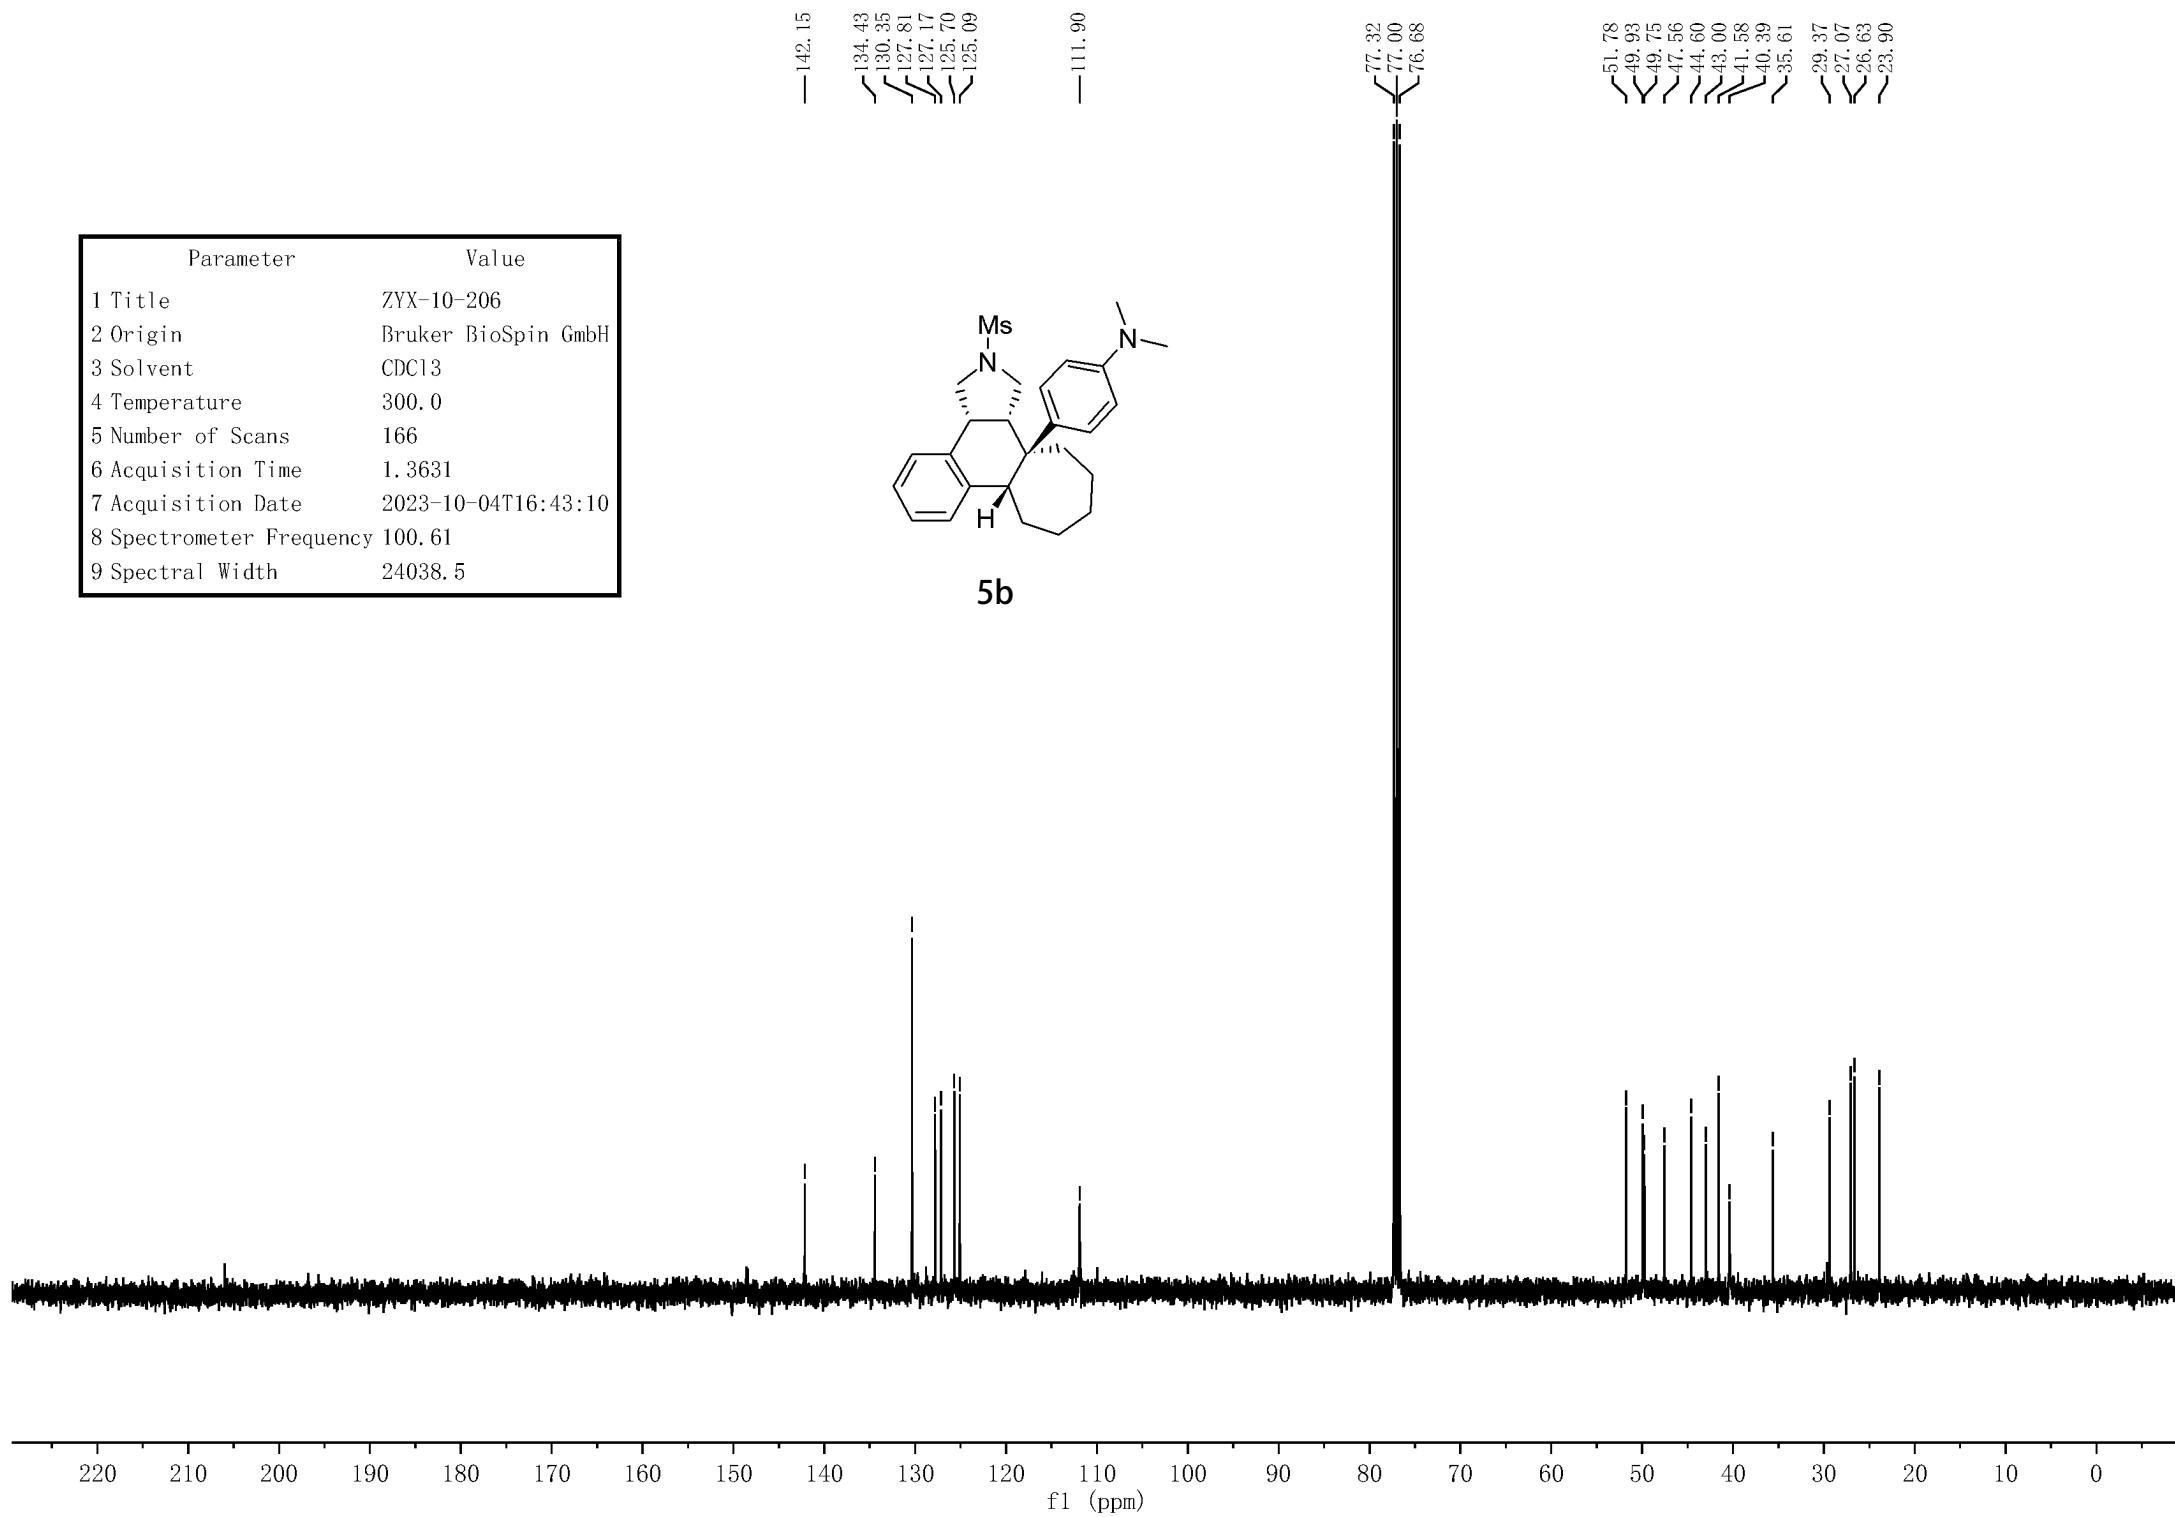



| Parameter                | Value               |
|--------------------------|---------------------|
| 1 Title                  | ZYX-10--206--DEPT   |
| 2 Origin                 | Bruker BioSpin GmbH |
| 3 Solvent                | CDCl3               |
| 4 Temperature            | 300.0               |
| 5 Number of Scans        | 49                  |
| 6 Acquisition Time       | 1.3631              |
| 7 Acquisition Date       | 2023-10-05T10:12:08 |
| 8 Spectrometer Frequency | 100.61              |
| 9 Spectral Width         | 24038.5             |



5b

130.35  
127.82  
127.18  
125.71  
125.10

111.90

51.78  
49.94  
49.74  
47.54  
43.01  
41.58  
40.40  
35.60

29.38  
27.08  
26.63  
23.91

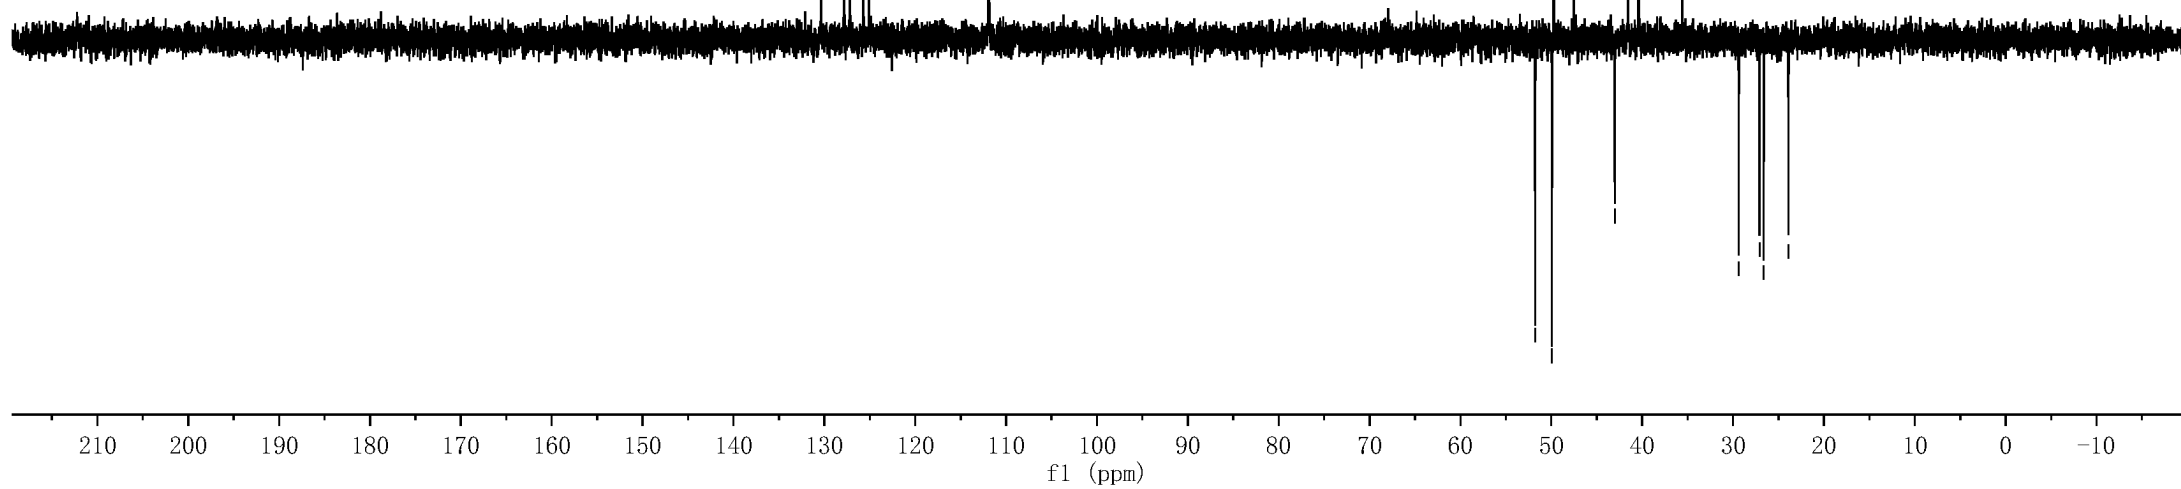

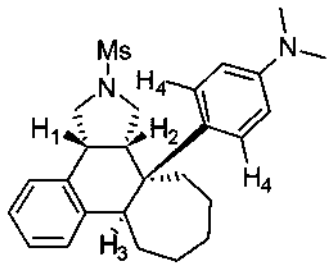

5b (NOESY)  
CDCl<sub>3</sub>, 600 MHz

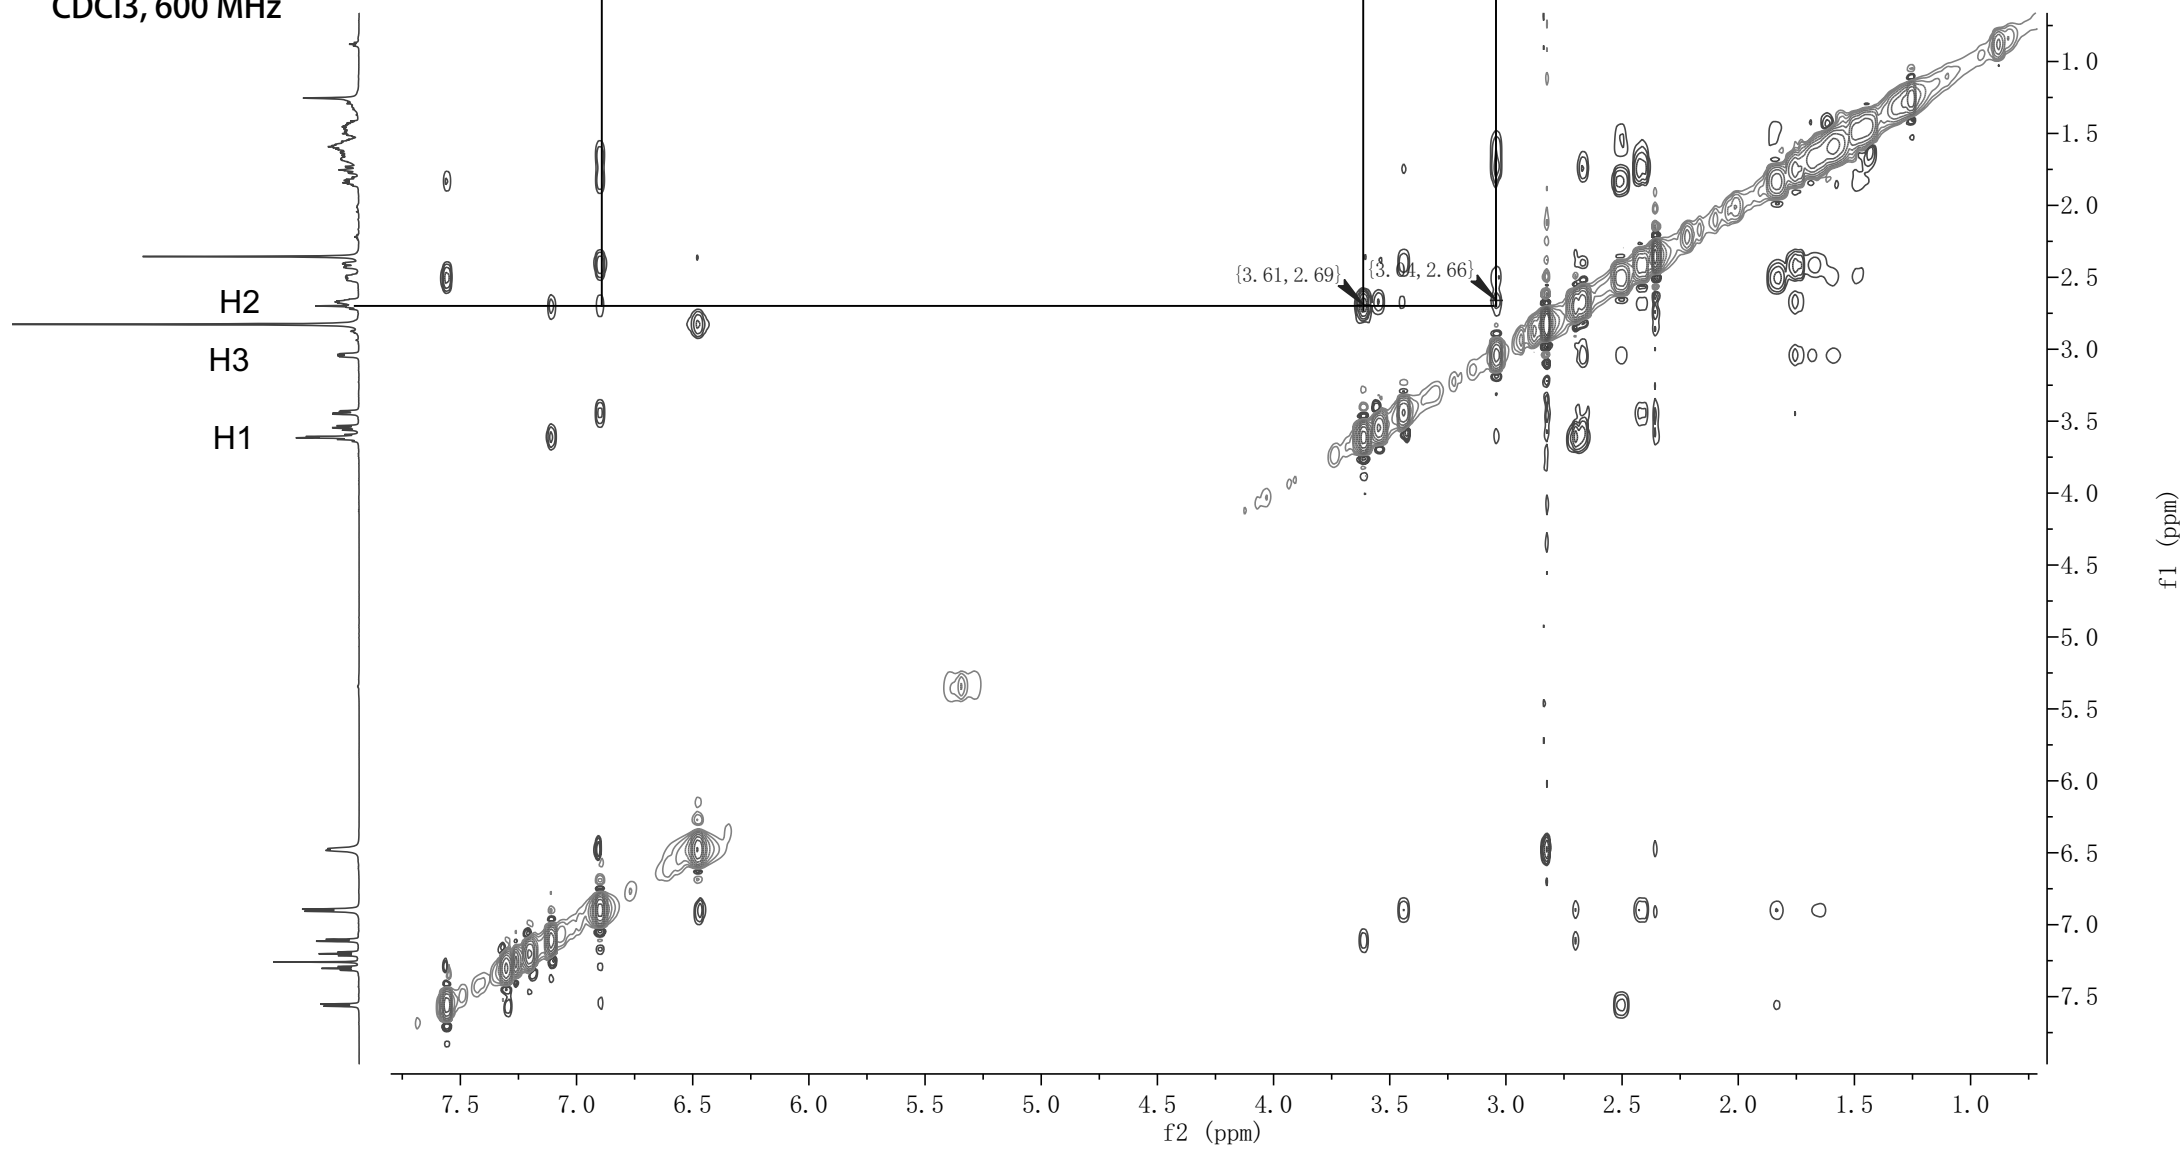

7.633  
7.615  
7.592  
7.438  
7.428  
7.417  
7.298  
7.281  
7.267  
7.258  
7.033  
6.901  
6.696  
6.629  
6.619  
6.607  
6.597  
6.564  
6.544

4.646  
4.625

3.699

3.085

0.000

| Parameter                | Value               |
|--------------------------|---------------------|
| 1 Title                  | zyx-6-43--H         |
| 2 Origin                 | Bruker BioSpin GmbH |
| 3 Solvent                | CDCl3               |
| 4 Temperature            | 297.6               |
| 5 Number of Scans        | 8                   |
| 6 Acquisition Time       | 3.9846              |
| 7 Acquisition Date       | 2022-08-09T16:02:41 |
| 8 Spectrometer Frequency | 399.93              |
| 9 Spectral Width         | 8223.7              |

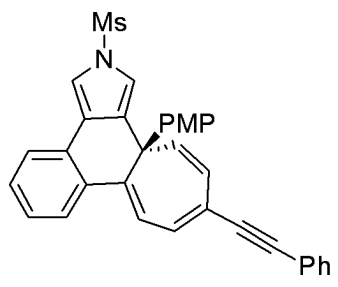

5c

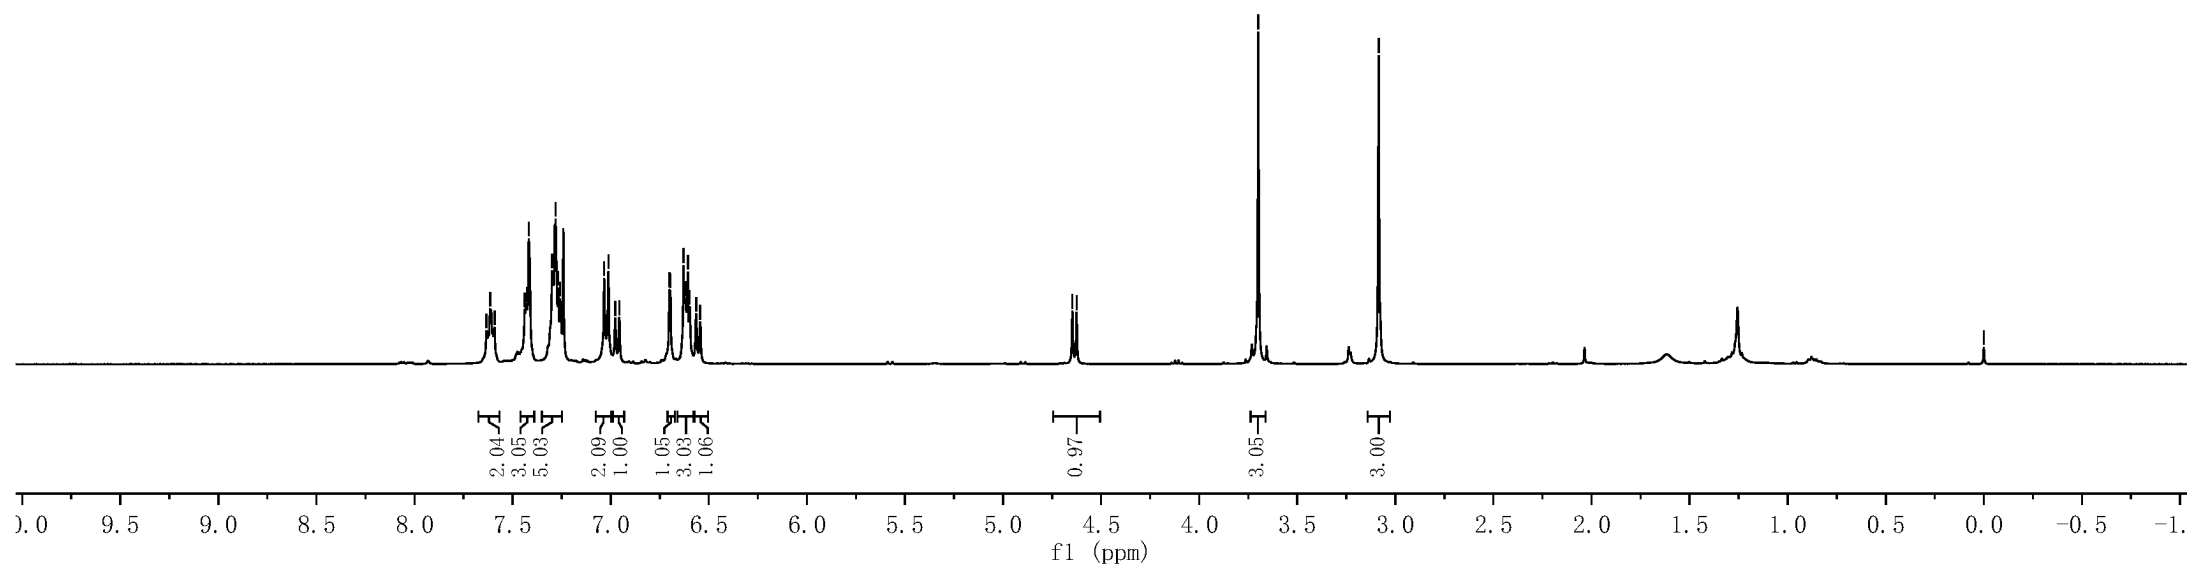

| Parameter                | Value               |
|--------------------------|---------------------|
| 1 Title                  | zyx-6-43--c         |
| 2 Origin                 | Bruker BioSpin GmbH |
| 3 Solvent                | CDCl3               |
| 4 Temperature            | 300.0               |
| 5 Number of Scans        | 119                 |
| 6 Acquisition Time       | 1.3631              |
| 7 Acquisition Date       | 2022-08-09T16:24:33 |
| 8 Spectrometer Frequency | 100.61              |
| 9 Spectral Width         | 24038.5             |

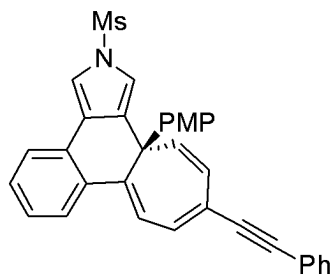

5c

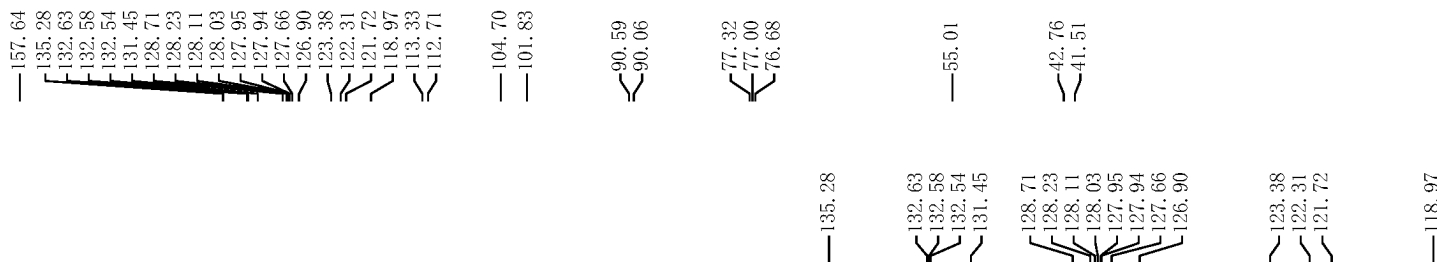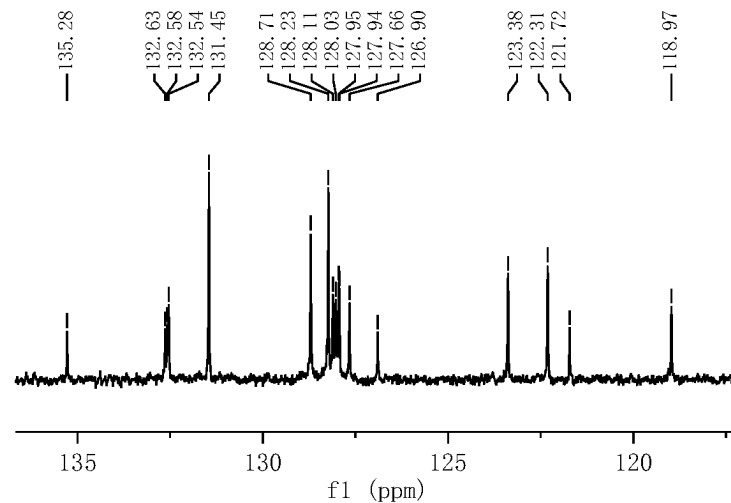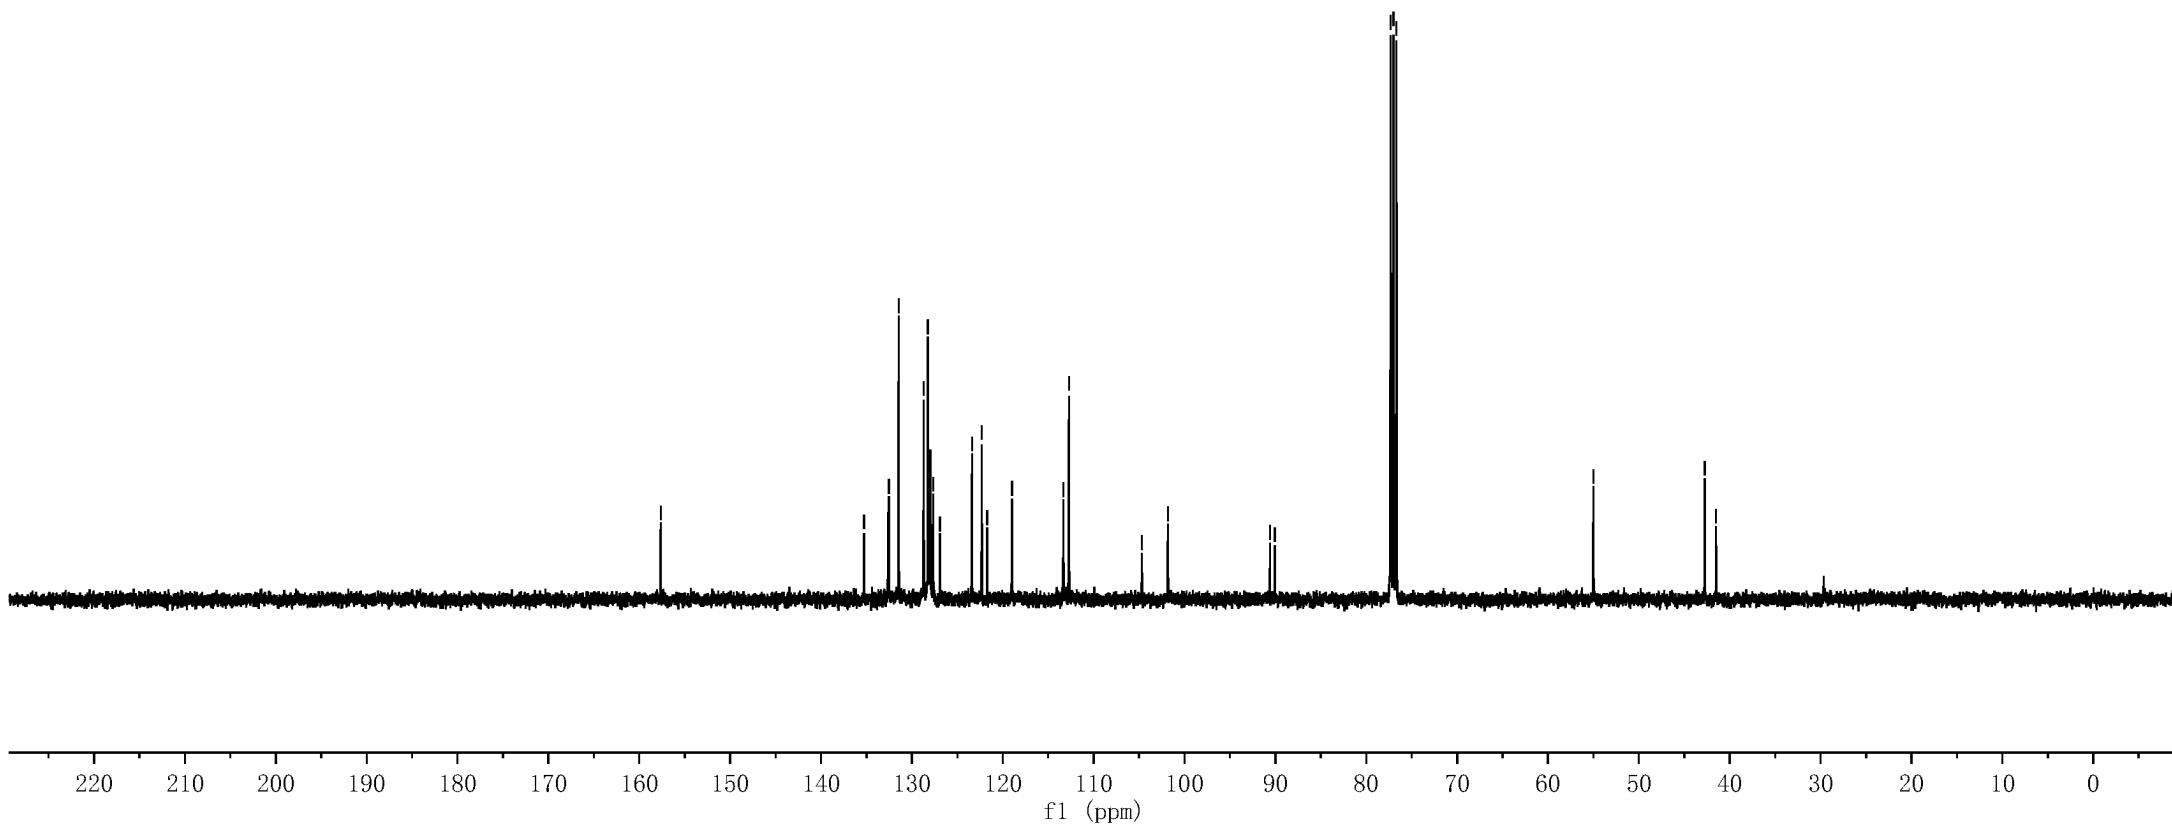

| Parameter                | Value               |
|--------------------------|---------------------|
| 1 Title                  | ZYX-6-43-DEPT       |
| 2 Origin                 | Bruker BioSpin GmbH |
| 3 Solvent                | CDC13               |
| 4 Temperature            | 297.1               |
| 5 Number of Scans        | 52                  |
| 6 Acquisition Time       | 1.3631              |
| 7 Acquisition Date       | 2022-08-30T09:30:25 |
| 8 Spectrometer Frequency | 100.56              |
| 9 Spectral Width         | 24038.5             |

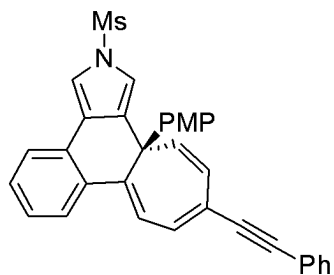

5c

132.53  
131.45  
128.71  
128.24  
128.12  
128.04  
127.95  
127.66  
123.39  
122.32  
118.97  
113.33  
112.69  
101.75

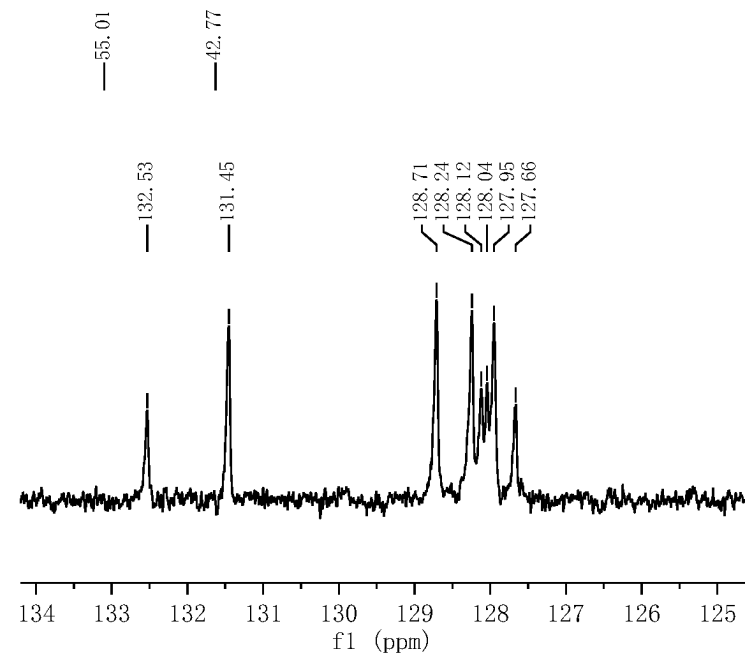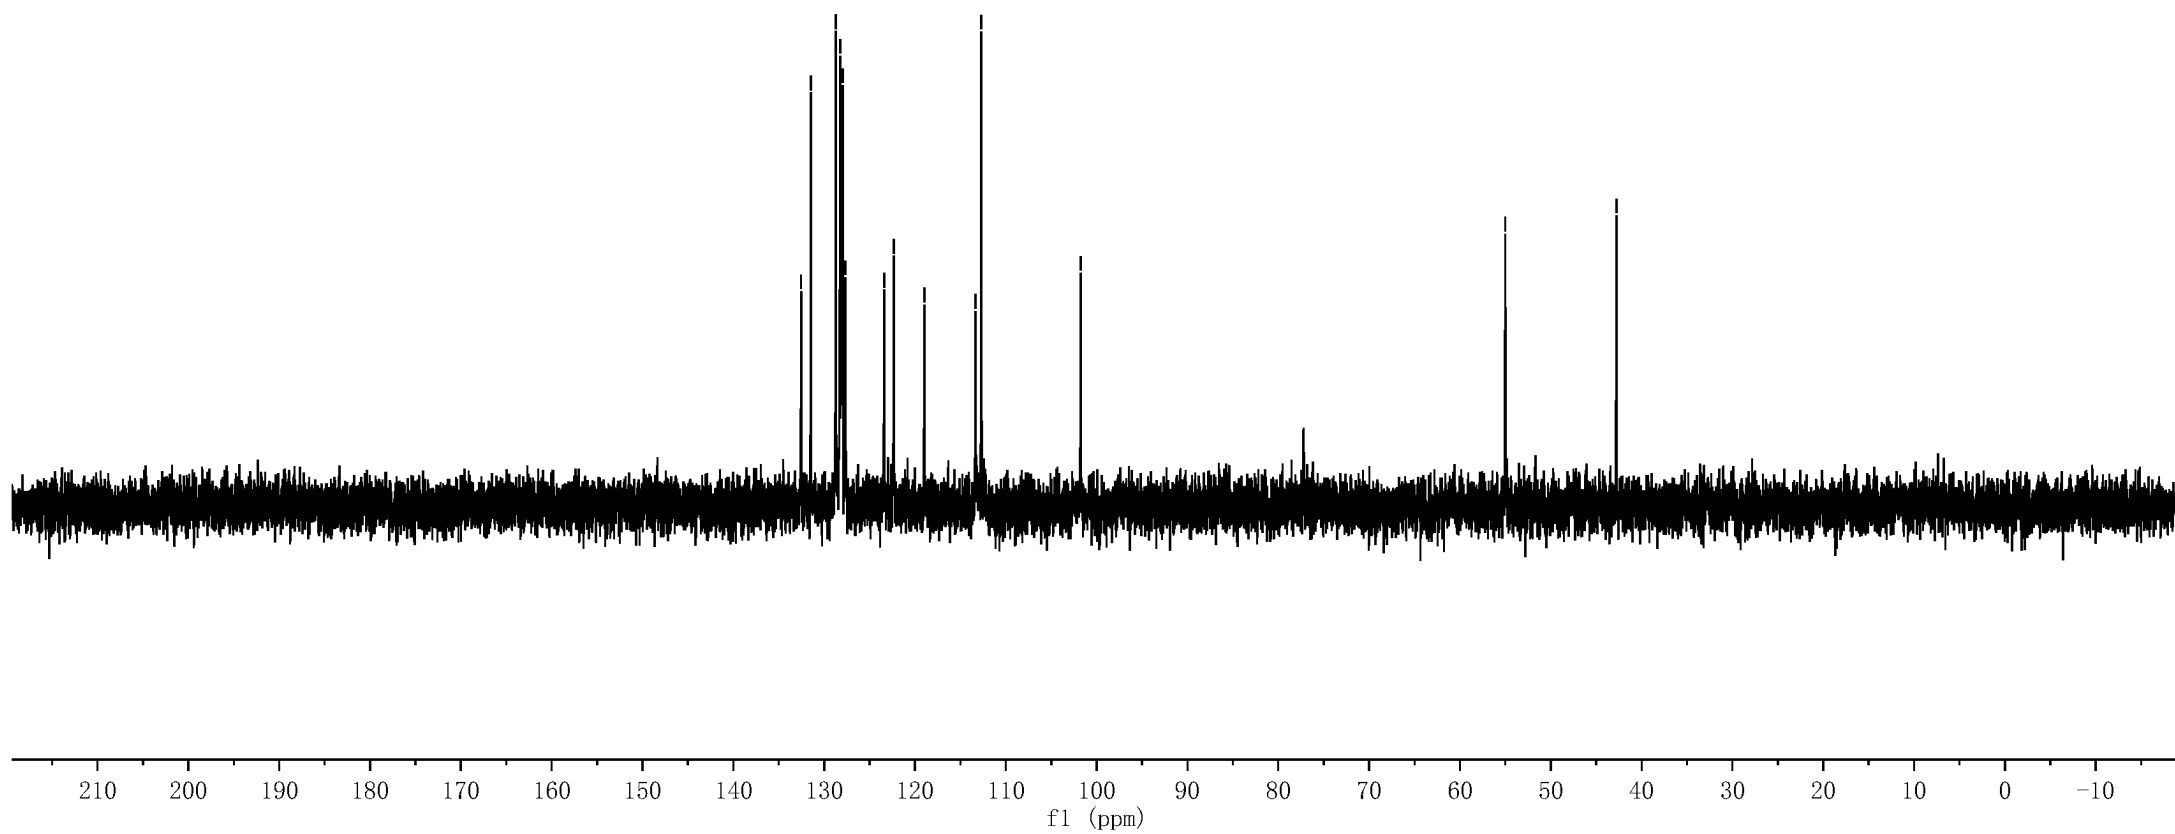

| Parameter                | Value               |
|--------------------------|---------------------|
| 1 Title                  | zyx-6-44--h         |
| 2 Origin                 | Bruker BioSpin GmbH |
| 3 Solvent                | CDCl3               |
| 4 Temperature            | 297.5               |
| 5 Number of Scans        | 8                   |
| 6 Acquisition Time       | 3.9846              |
| 7 Acquisition Date       | 2022-08-09T15:49:24 |
| 8 Spectrometer Frequency | 399.93              |
| 9 Spectral Width         | 8223.7              |

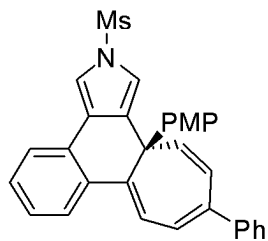

5d

7.667  
7.616  
7.422  
7.312  
7.294  
7.267  
7.245  
7.072  
7.052  
7.018  
6.729  
6.561  
6.544  
6.491

4.675  
4.654

3.653

3.091

0.000

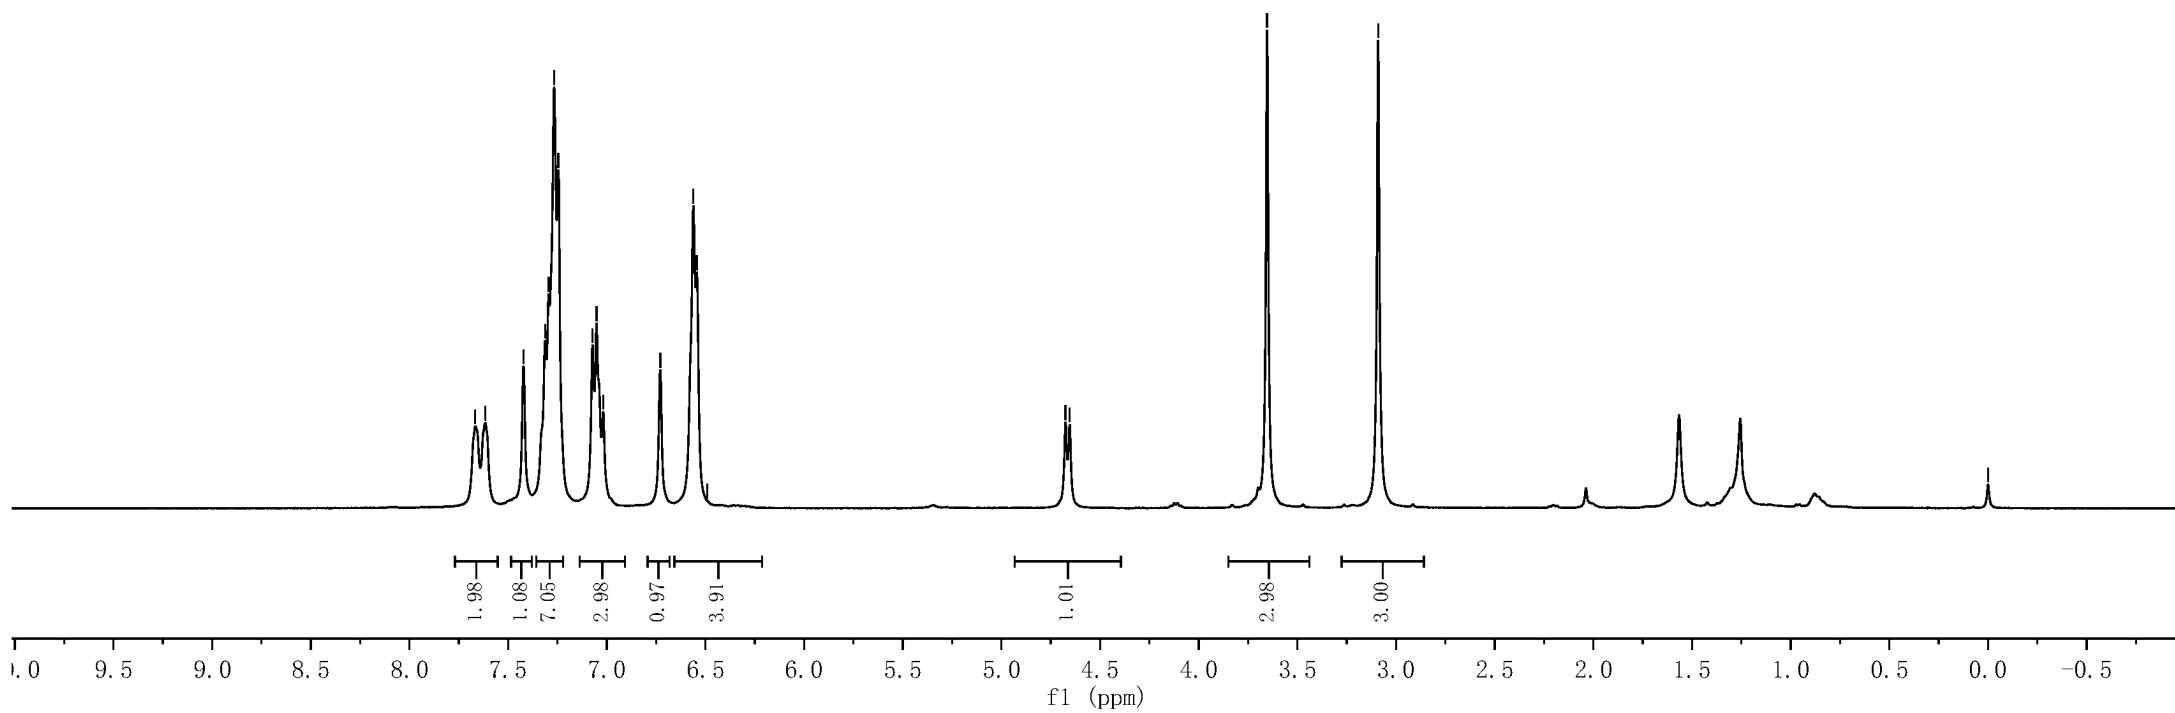

| Parameter                | Value               |
|--------------------------|---------------------|
| 1 Title                  | ZYX-6-44---C        |
| 2 Origin                 |                     |
| 3 Solvent                | CDC13               |
| 4 Temperature            | 299.5               |
| 5 Number of Scans        | 800                 |
| 6 Acquisition Time       | 1.0000              |
| 7 Acquisition Date       | 2022-08-09T16:59:39 |
| 8 Spectrometer Frequency | 100.56              |
| 9 Spectral Width         | 26041.0             |

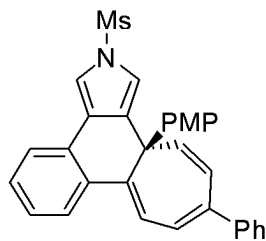

5d

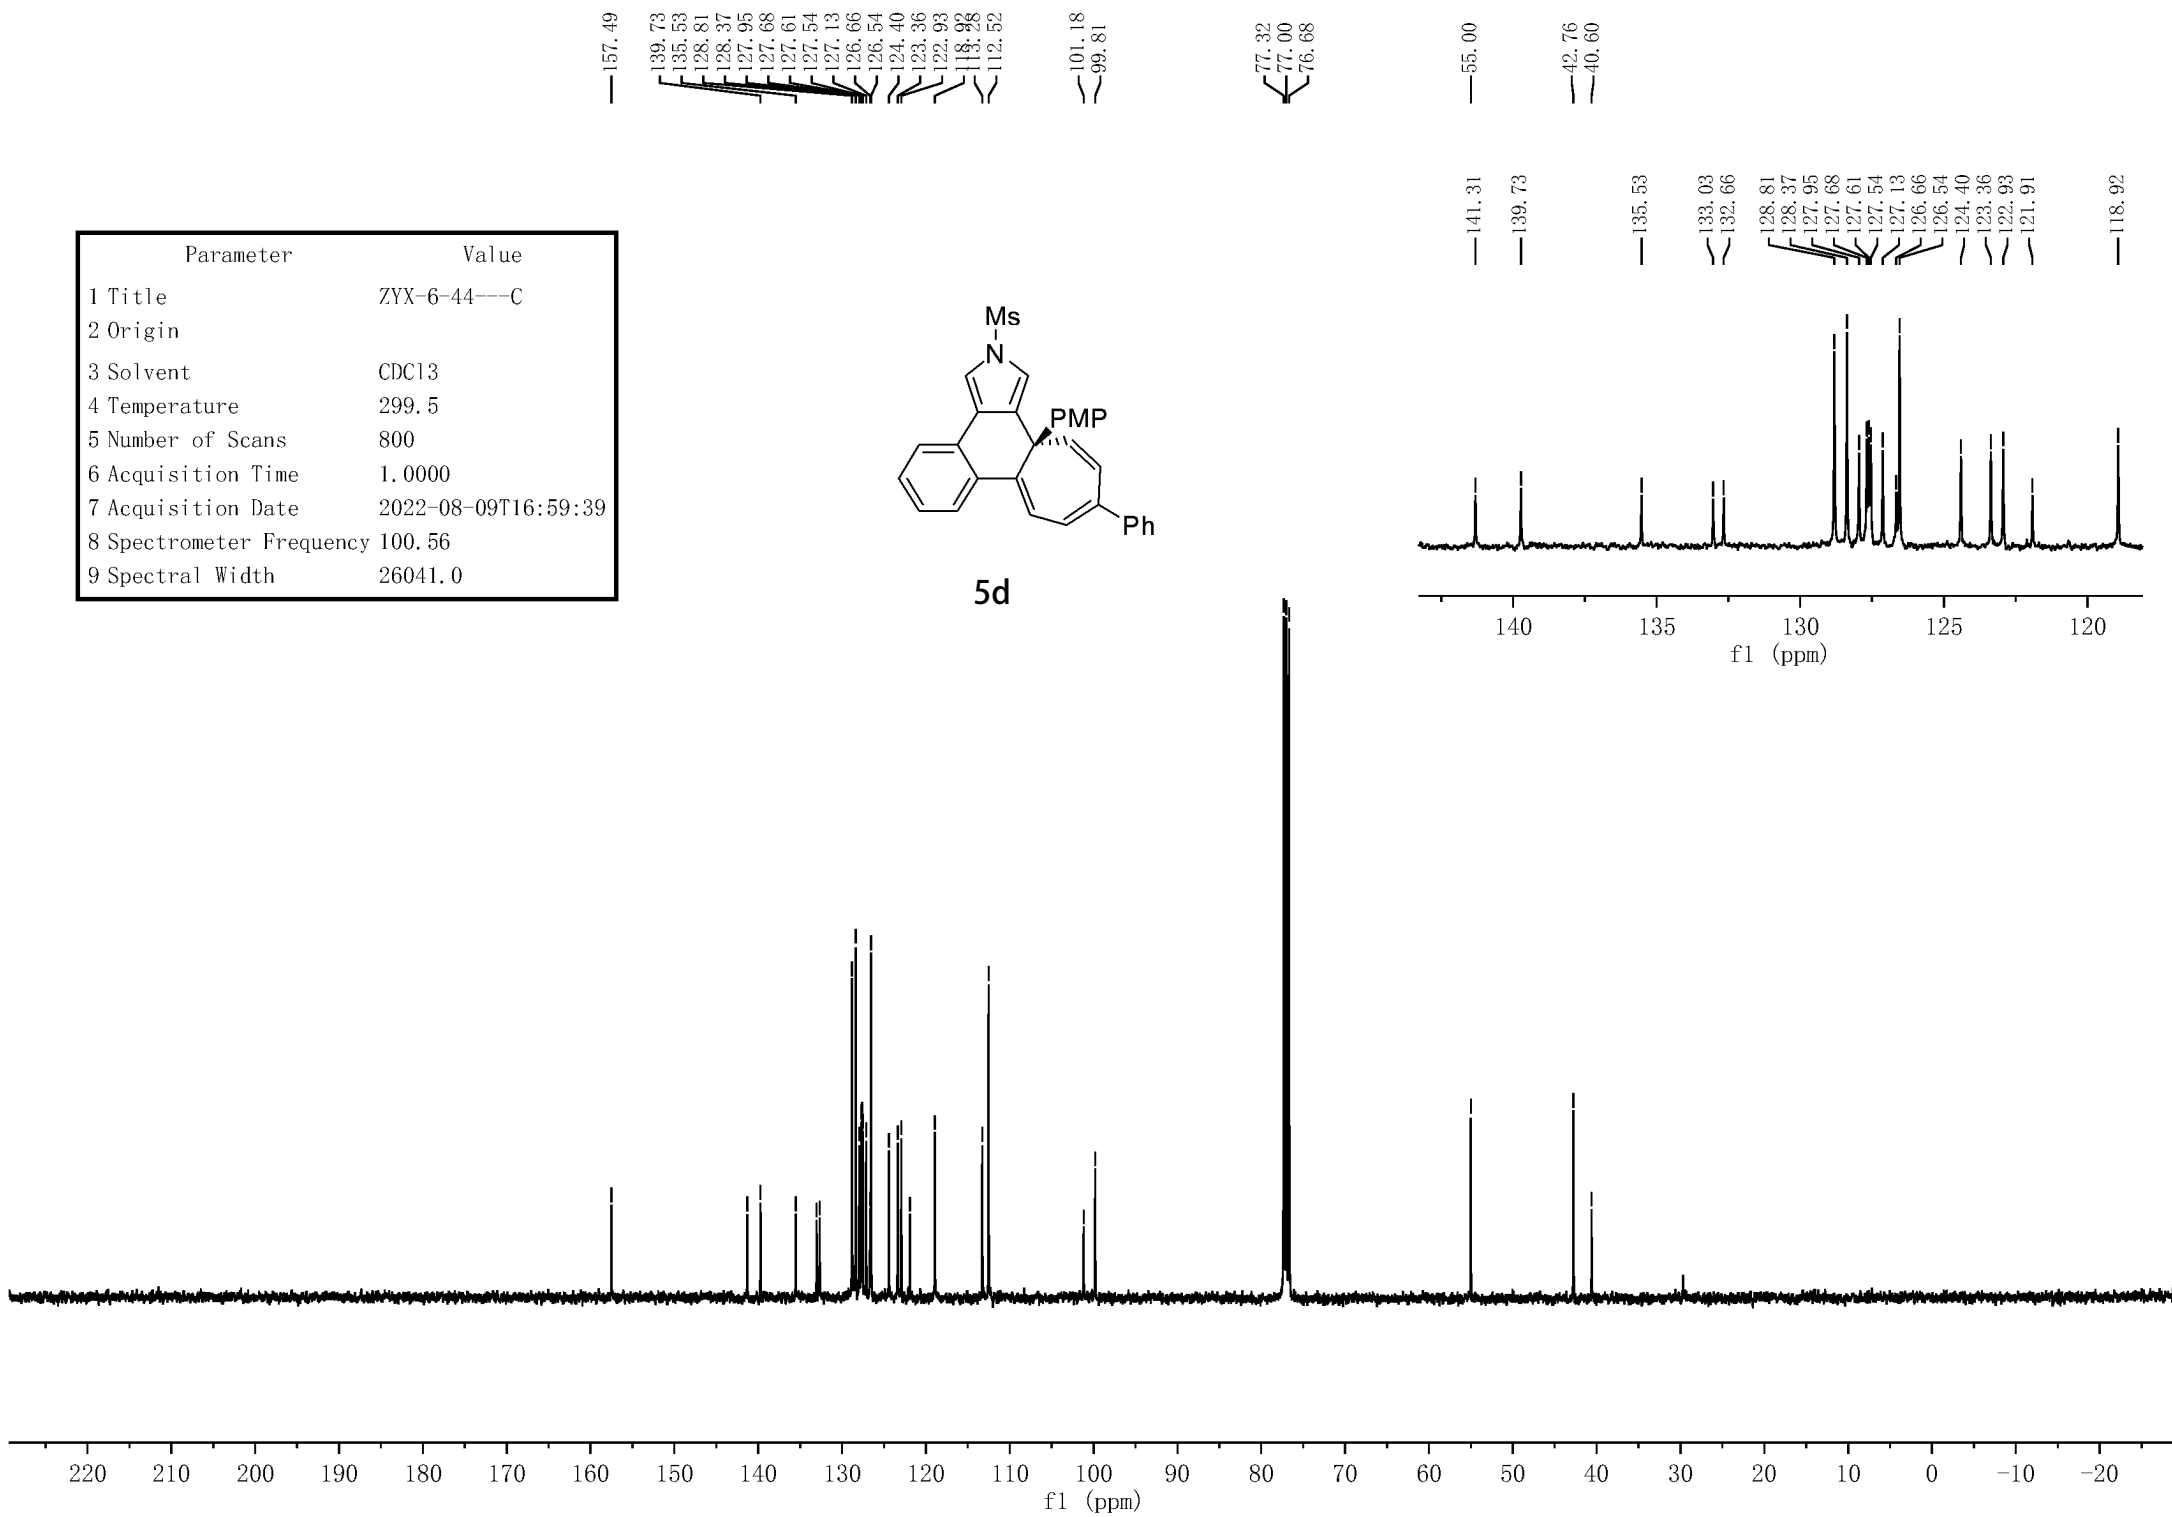

| Parameter                | Value               |
|--------------------------|---------------------|
| 1 Title                  | ZYX-6-44-DEPT       |
| 2 Origin                 | Bruker BioSpin GmbH |
| 3 Solvent                | CDCl3               |
| 4 Temperature            | 297.3               |
| 5 Number of Scans        | 61                  |
| 6 Acquisition Time       | 1.3631              |
| 7 Acquisition Date       | 2022-08-30T09:34:37 |
| 8 Spectrometer Frequency | 100.56              |
| 9 Spectral Width         | 24038.5             |



5d

128.81  
128.37  
127.95  
127.68  
127.61  
127.55  
127.13  
126.54  
124.41  
123.36  
122.93  
118.92  
113.28  
112.51

99.83

55.00

42.76

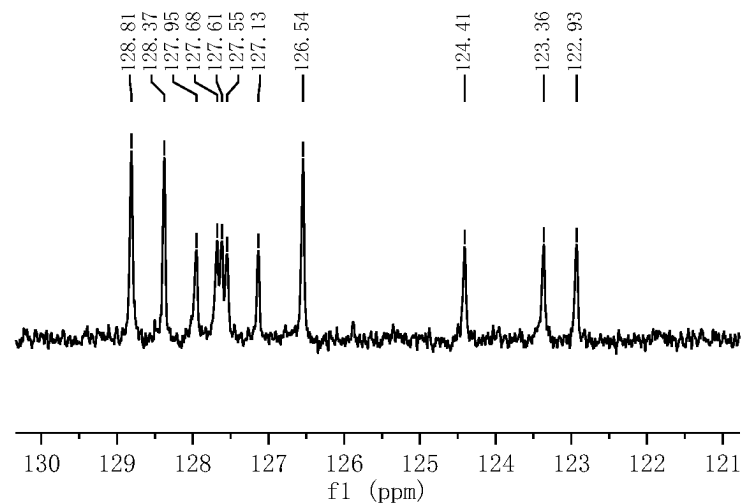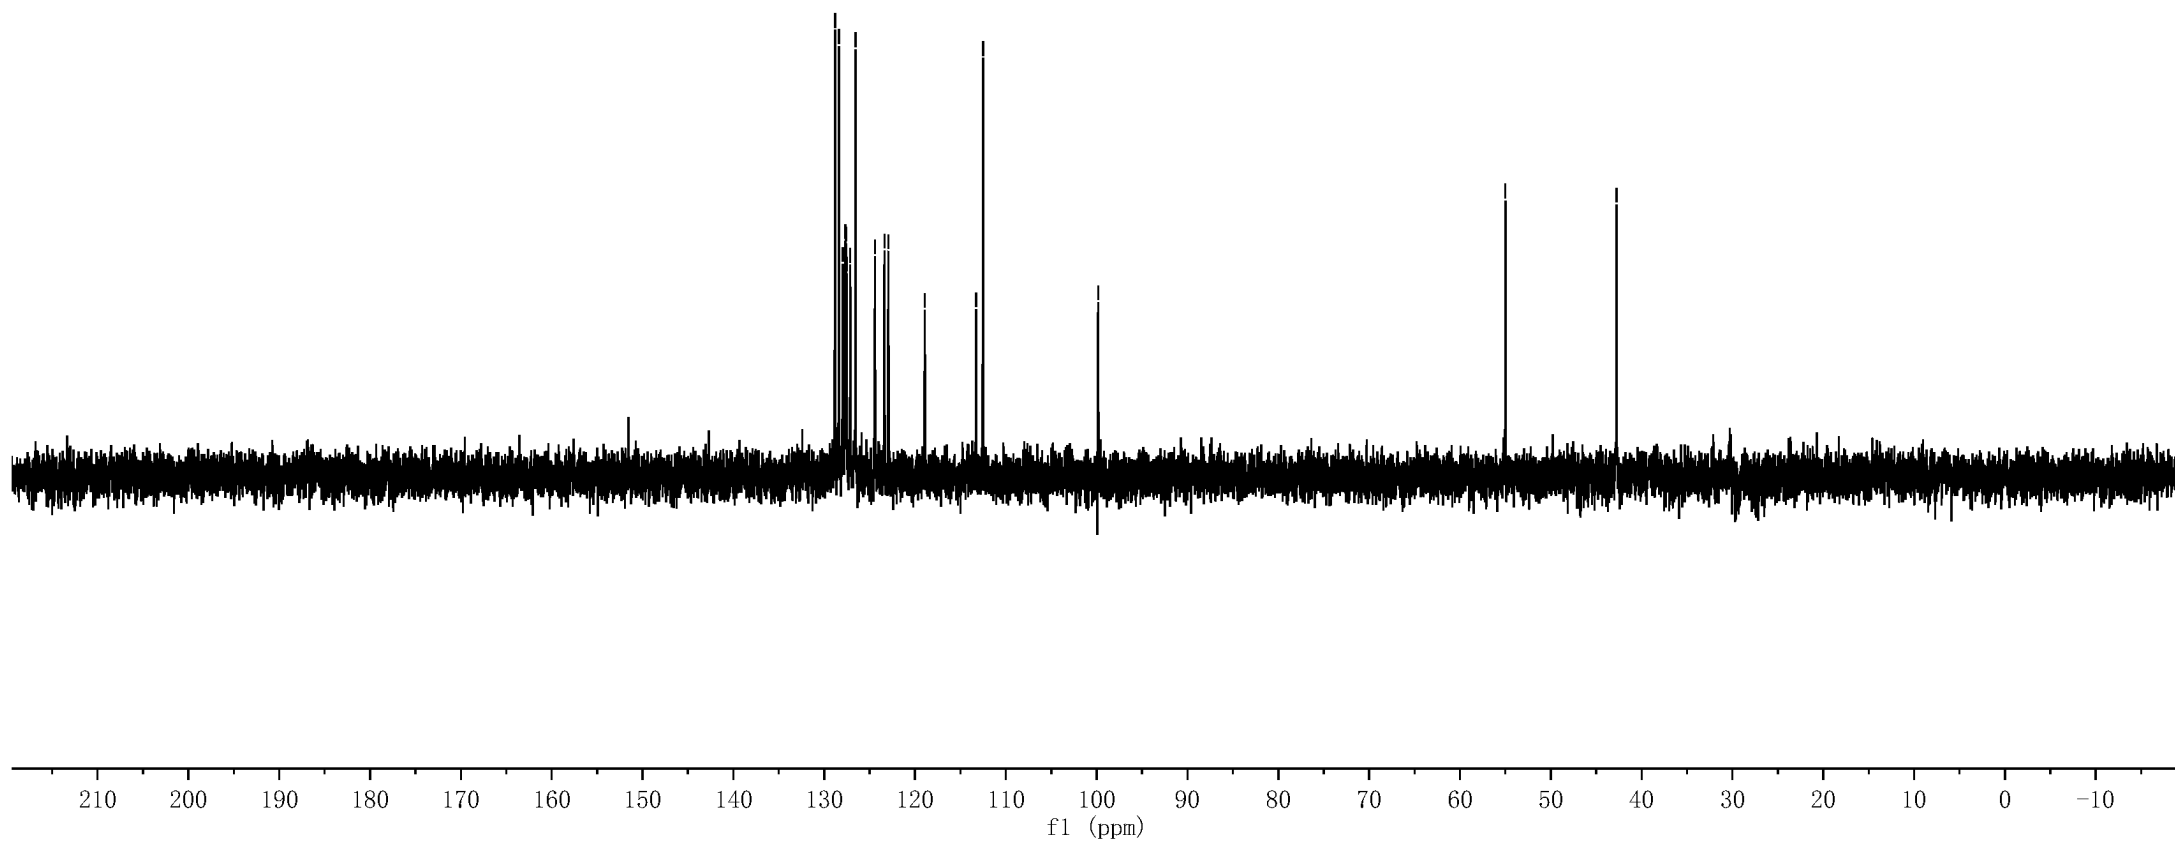



| Parameter                | Value               |
|--------------------------|---------------------|
| 1 Title                  | ZYX-6-56            |
| 2 Origin                 | Bruker BioSpin GmbH |
| 3 Solvent                | CDCl3               |
| 4 Temperature            | 298.0               |
| 5 Number of Scans        | 9                   |
| 6 Acquisition Time       | 2.7263              |
| 7 Acquisition Date       | 2022-08-16T17:05:41 |
| 8 Spectrometer Frequency | 600.13              |
| 9 Spectral Width         | 12019.2             |

7.677  
7.665  
7.584  
7.336  
7.323  
7.312  
7.232  
7.207  
7.195  
7.100  
7.088  
7.076  
6.919  
6.907  
6.855  
6.842  
6.709  
6.564  
6.551  
6.393  
6.381  
6.345  
6.329  
6.235  
6.219  
6.072  
6.058

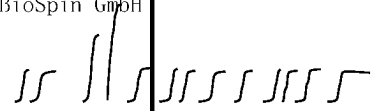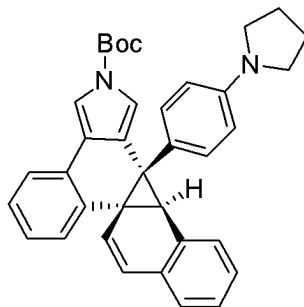

5e

3.173  
3.163  
3.154  
3.144  
2.633  
1.929  
1.919  
1.909  
1.557  
0.000

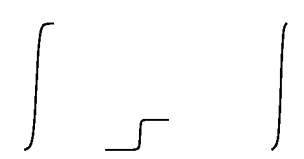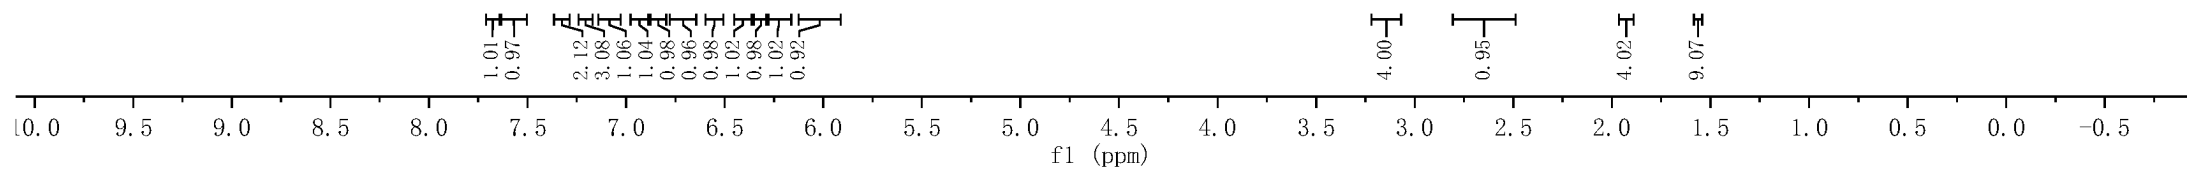

1.01  
0.97  
2.12  
3.08  
1.06  
1.04  
0.98  
0.96  
0.98  
1.02  
0.98  
1.02  
0.92

4.00  
0.95  
4.02  
9.07

| Parameter                | Value               |
|--------------------------|---------------------|
| 1 Title                  | ZYX-6-56            |
| 2 Origin                 | Bruker BioSpin GmbH |
| 3 Solvent                | CDCl3               |
| 4 Temperature            | 298.0               |
| 5 Number of Scans        | 25                  |
| 6 Acquisition Time       | 0.9044              |
| 7 Acquisition Date       | 2022-08-16T17:02:18 |
| 8 Spectrometer Frequency | 150.90              |
| 9 Spectral Width         | 36231.9             |

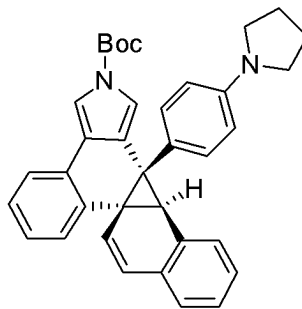

5e

148.82  
145.95  
131.43  
131.40  
129.90  
128.86  
127.33  
127.22  
127.14  
126.75  
126.44  
125.95  
125.87  
123.21  
123.24  
111.57  
109.73

83.65  
77.21  
77.00  
76.79

47.41  
41.68  
37.30

27.97  
27.93  
25.38

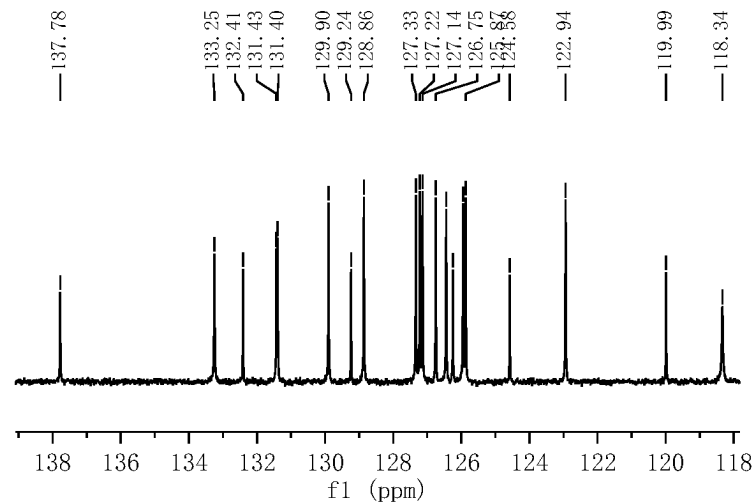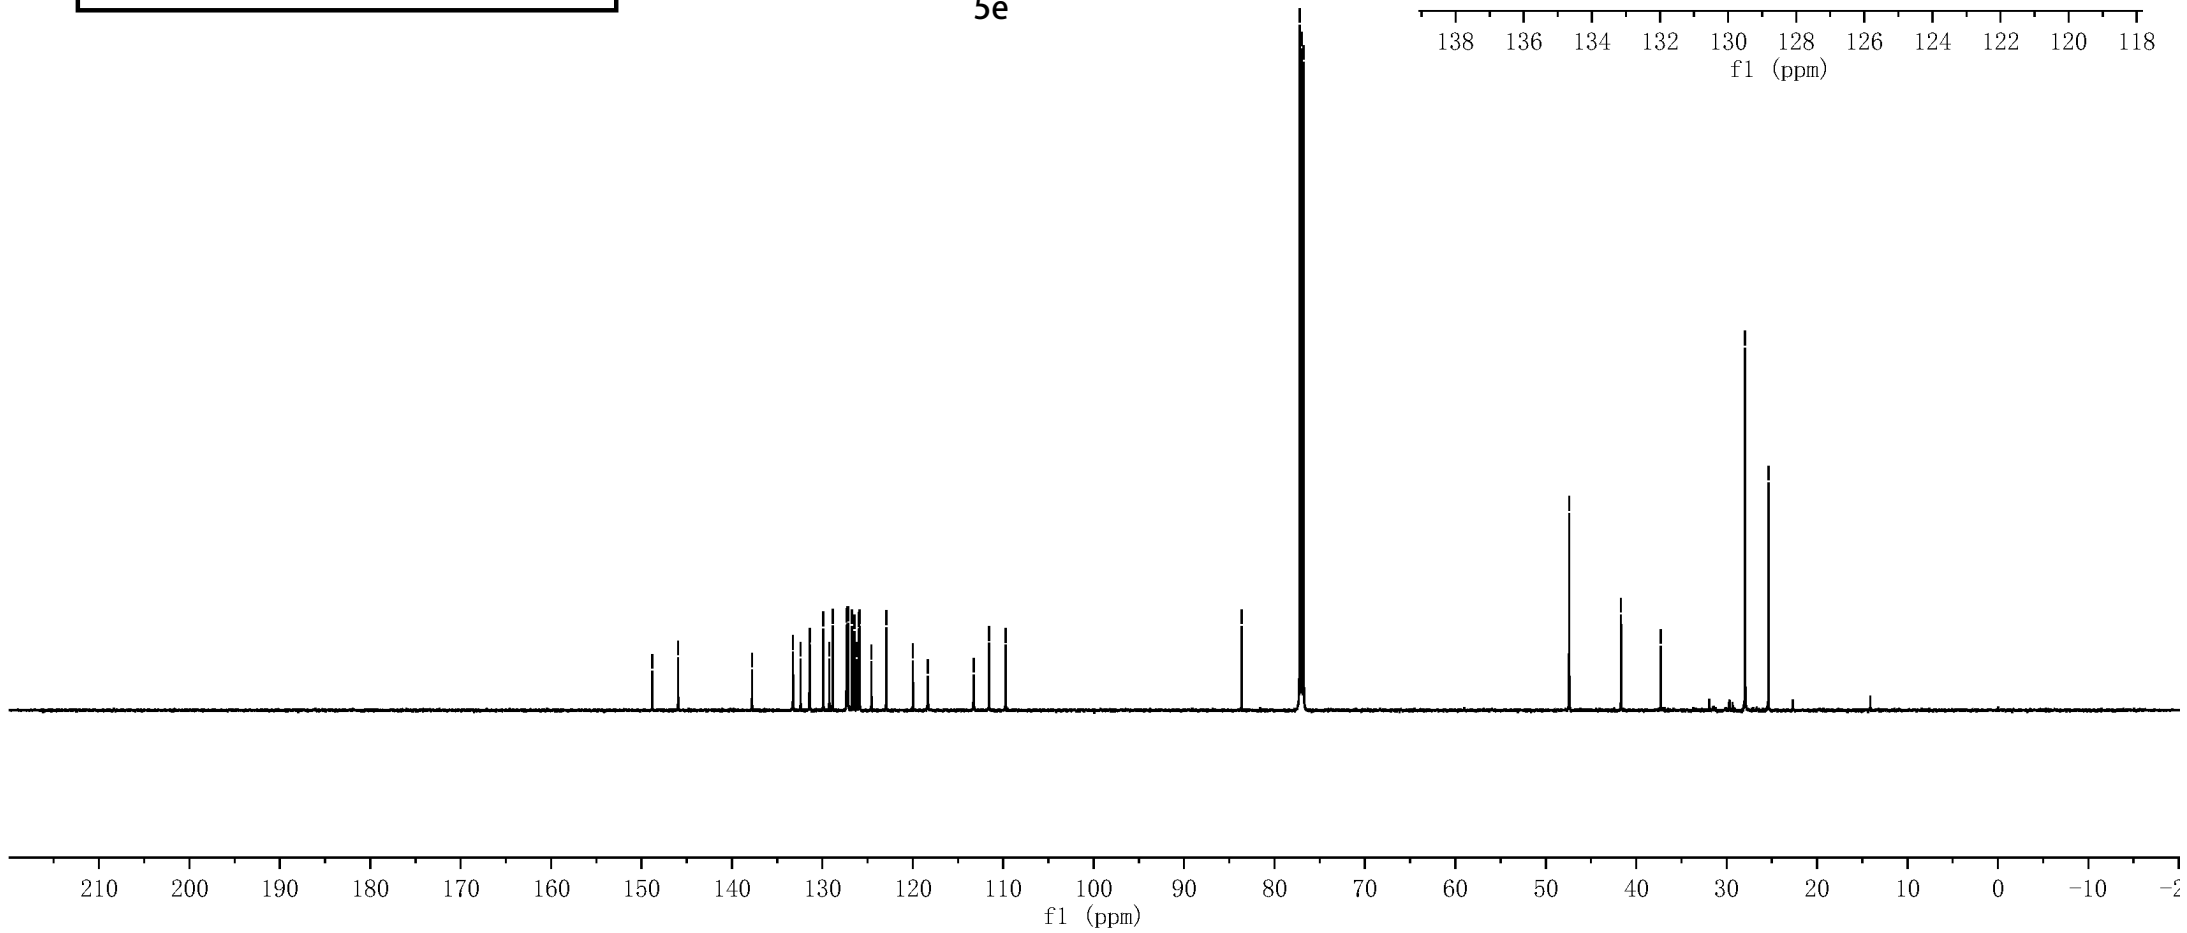

| Parameter                | Value               |
|--------------------------|---------------------|
| 1 Title                  | zyx-6---56-dept     |
| 2 Origin                 | Bruker BioSpin GmbH |
| 3 Solvent                | CDC13               |
| 4 Temperature            | 300.0               |
| 5 Number of Scans        | 36                  |
| 6 Acquisition Time       | 1.3631              |
| 7 Acquisition Date       | 2022-08-17T09:46:21 |
| 8 Spectrometer Frequency | 100.61              |
| 9 Spectral Width         | 24038.5             |

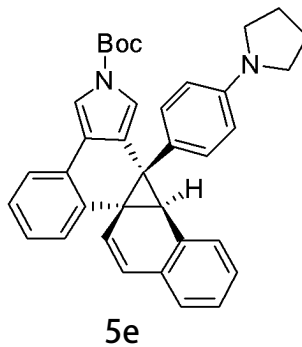

133.25  
131.38  
129.88  
128.85  
127.32  
127.20  
127.14  
126.74  
126.44  
125.93  
125.86  
122.93  
118.35  
113.26  
111.58  
109.73

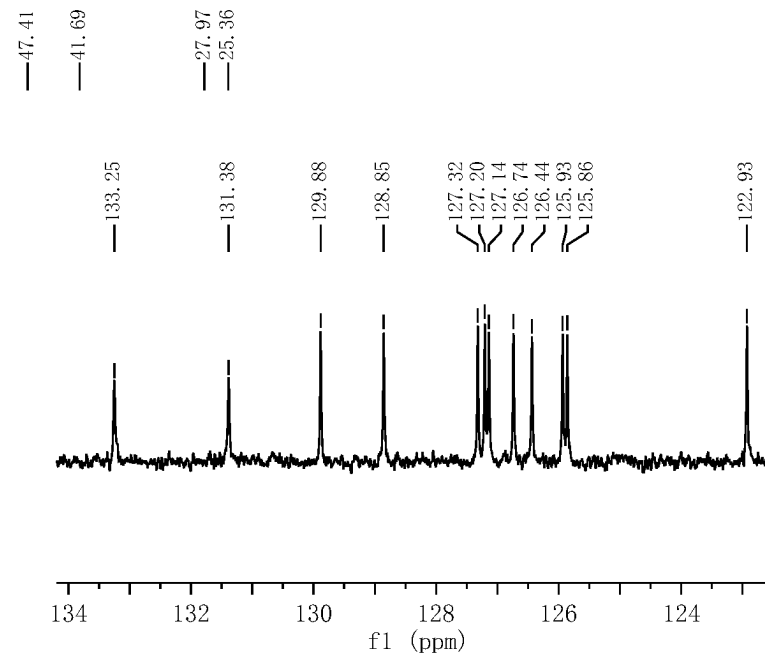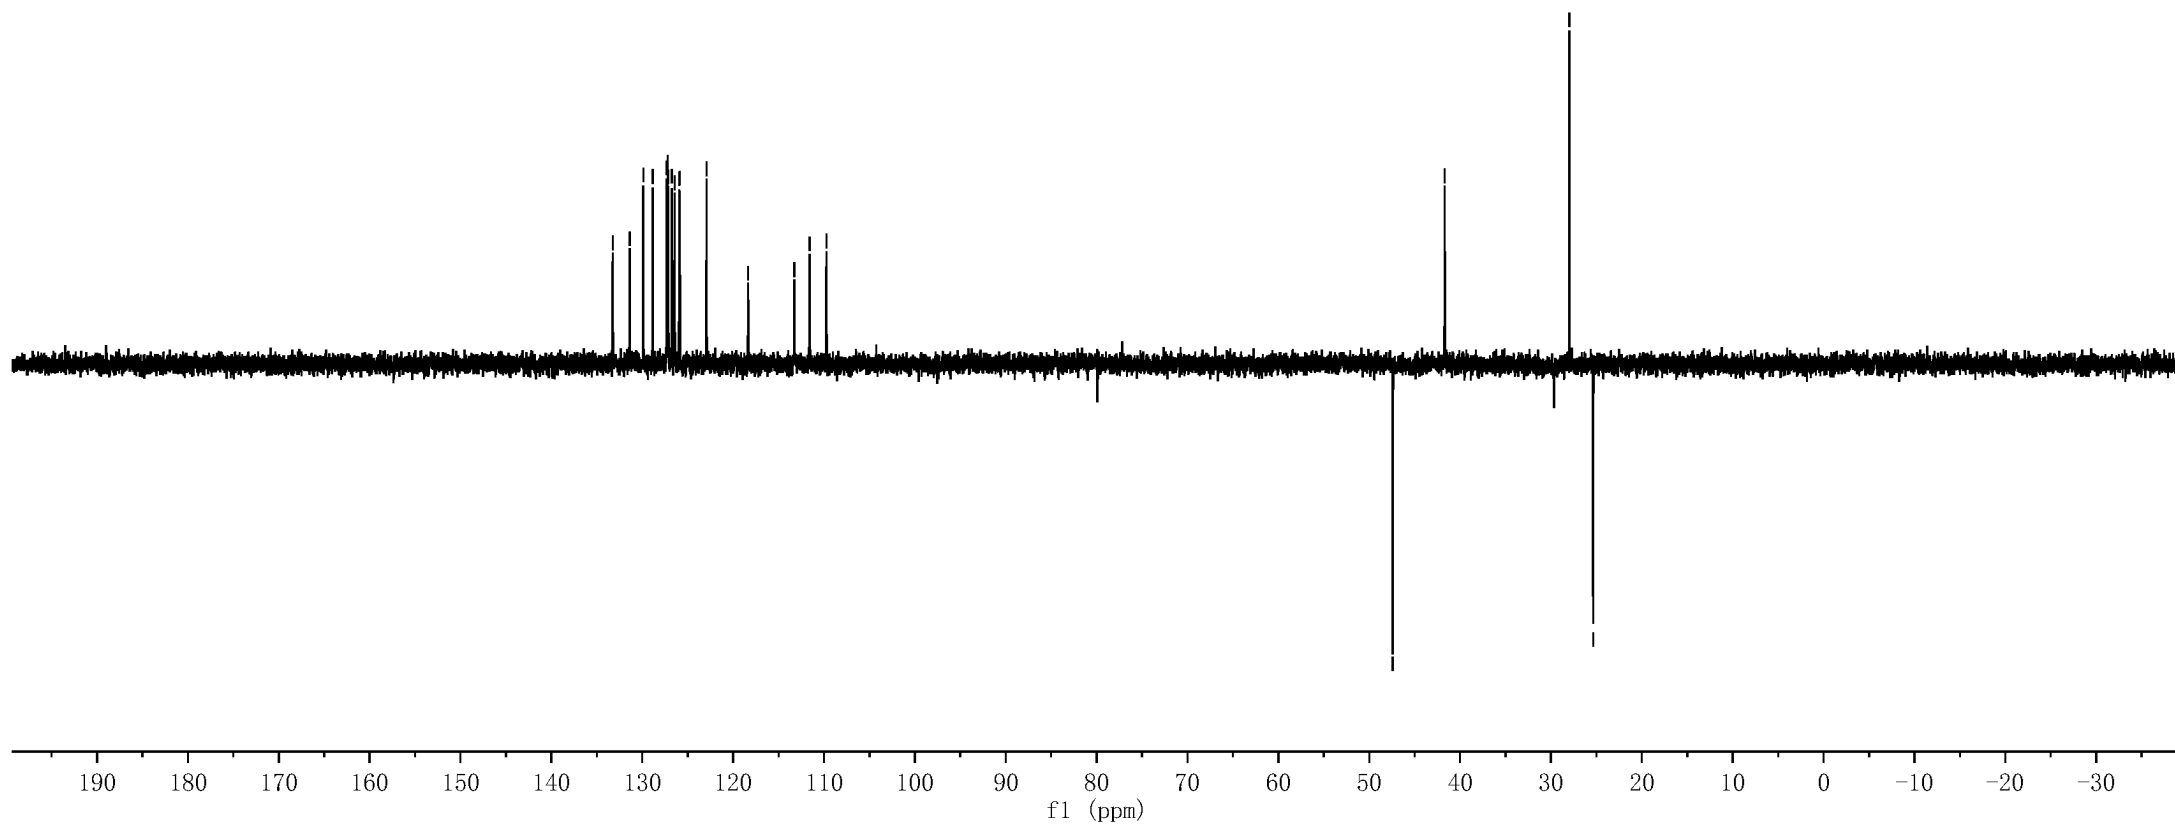

| Parameter                | Value               |
|--------------------------|---------------------|
| 1 Title                  | ZXY-6---95          |
| 2 Origin                 |                     |
| 3 Solvent                | CDC13               |
| 4 Temperature            | 298.2               |
| 5 Number of Scans        | 16                  |
| 6 Acquisition Time       | 4.0002              |
| 7 Acquisition Date       | 2022-09-07T14:07:31 |
| 8 Spectrometer Frequency | 399.92              |
| 9 Spectral Width         | 8012.0              |

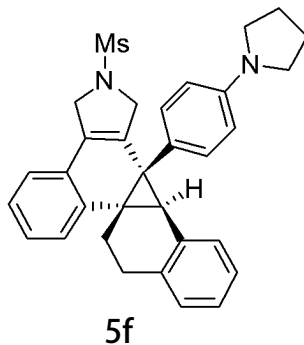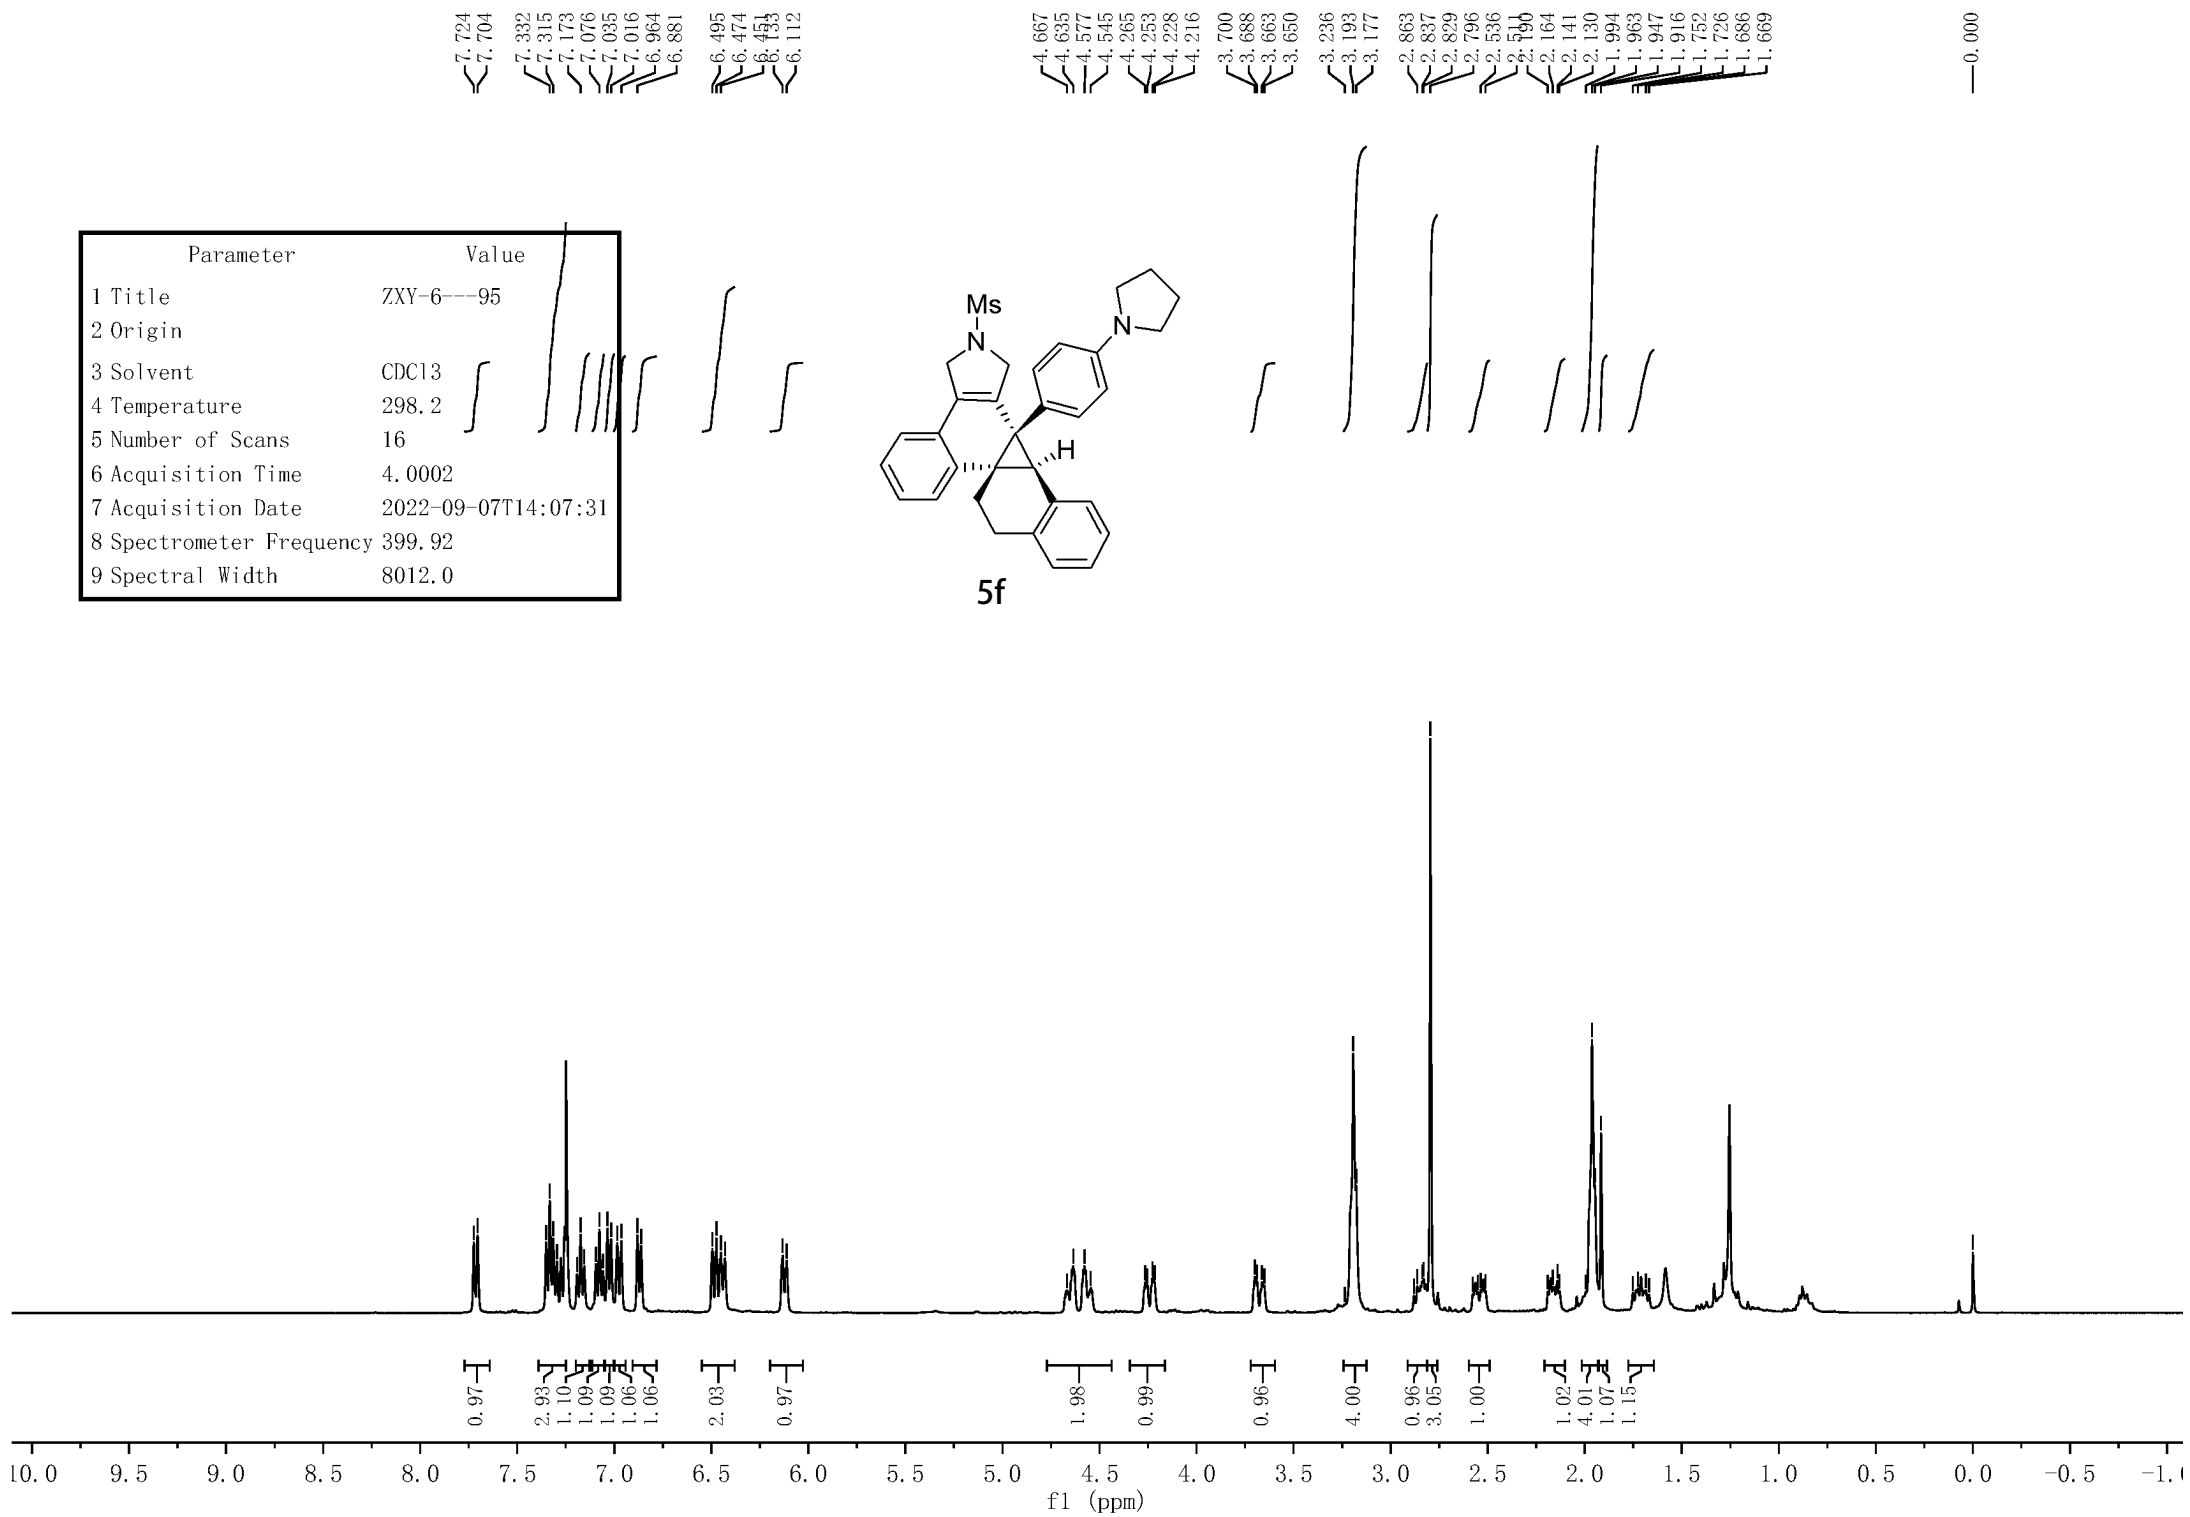

| Parameter                | Value               |
|--------------------------|---------------------|
| 1 Title                  | ZXY-6---95          |
| 2 Origin                 |                     |
| 3 Solvent                | CDC13               |
| 4 Temperature            | 298.4               |
| 5 Number of Scans        | 400                 |
| 6 Acquisition Time       | 1.0000              |
| 7 Acquisition Date       | 2022-09-07T14:31:03 |
| 8 Spectrometer Frequency | 100.56              |
| 9 Spectral Width         | 26041.0             |

146.84  
135.51  
133.87  
130.97  
130.17  
129.06  
128.19  
127.45  
127.42  
125.97  
125.94  
125.52  
123.58  
110.92

77.32  
77.00  
76.68

57.05  
54.74  
47.44  
41.10  
35.73  
34.61  
32.82  
27.44  
25.41  
23.77

139.01  
138.71  
135.51  
133.87  
130.97  
130.17  
129.06  
128.19  
127.45  
127.42  
125.97  
125.94  
125.52  
124.43  
123.53

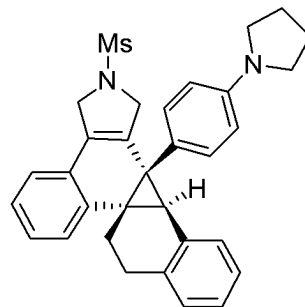

5f

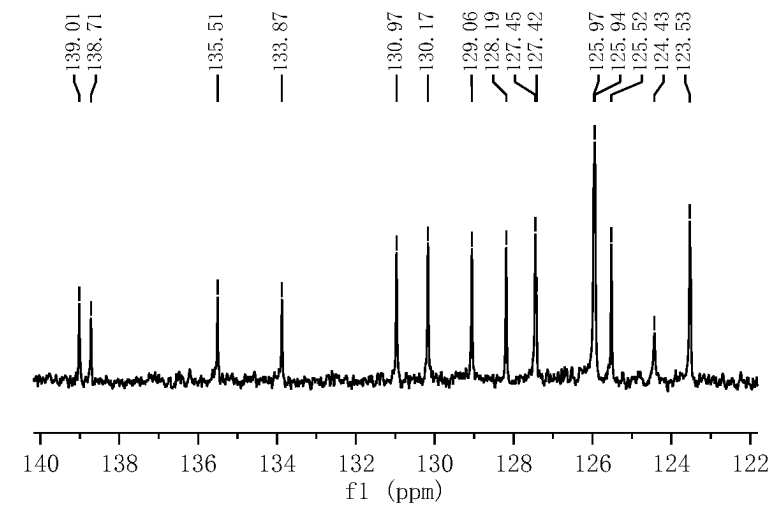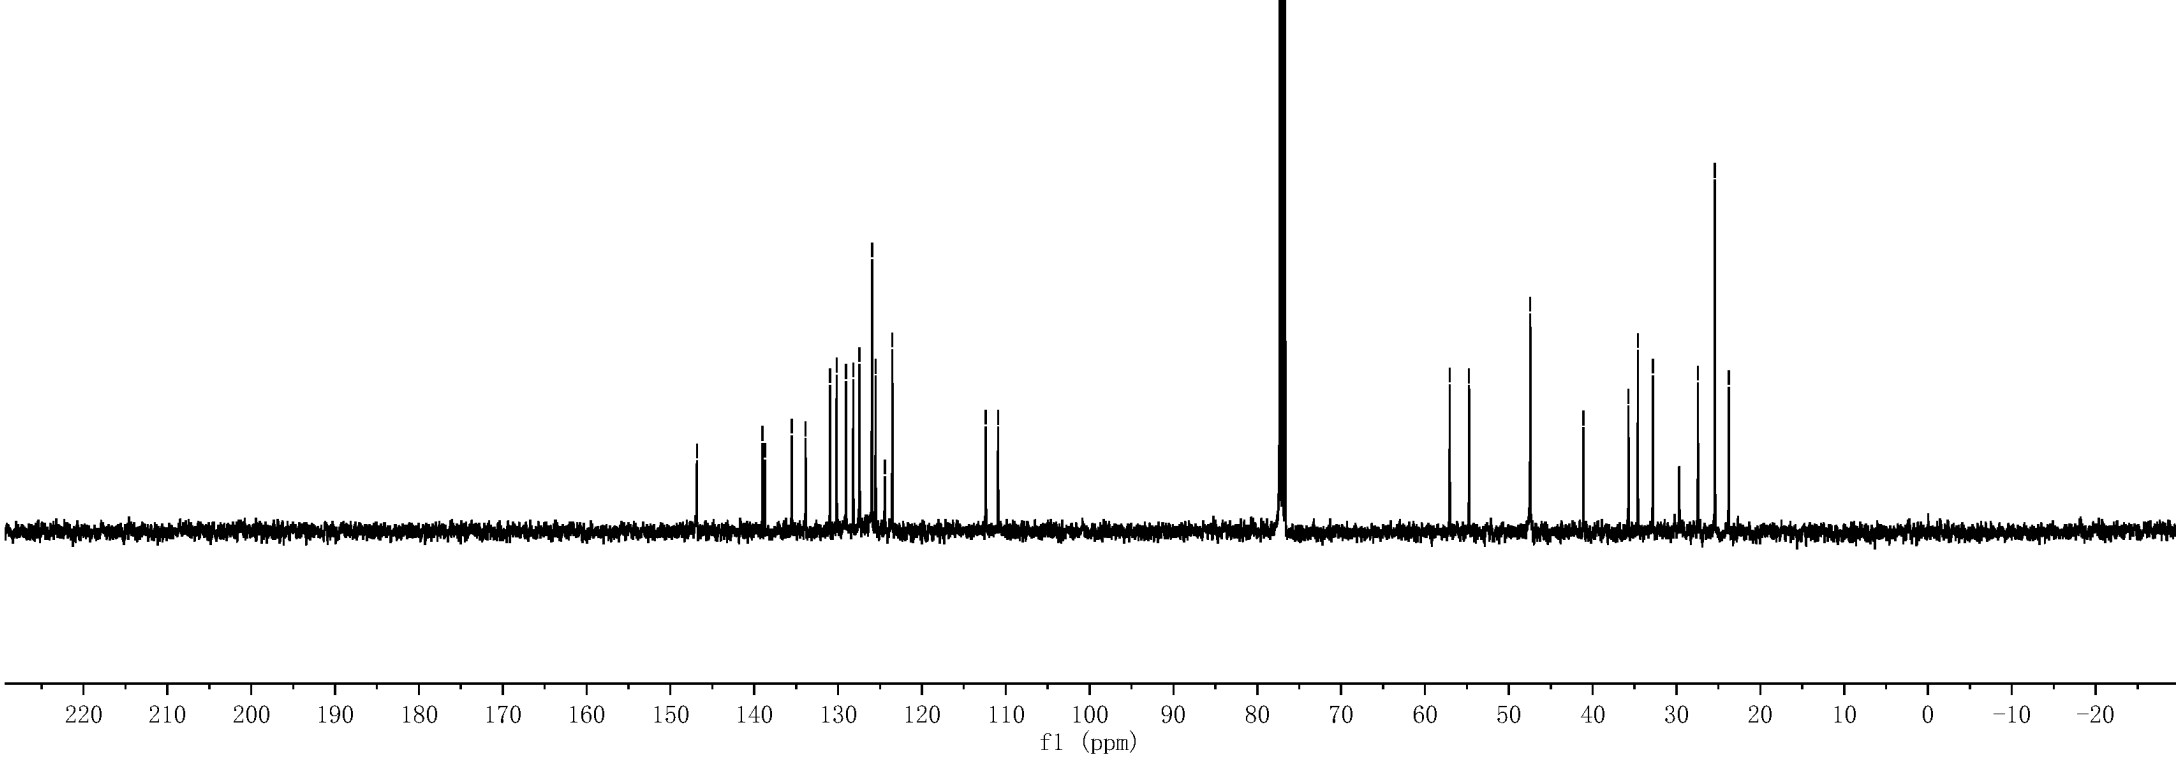

130.99  
130.18  
129.07  
128.20  
127.46  
125.98  
125.95  
125.53  
123.54

112.40  
110.94

57.05  
54.75

47.46

34.61  
32.83

27.45  
25.41  
23.79

| Parameter                | Value               |
|--------------------------|---------------------|
| 1 Title                  | ZYX-6-95-dept       |
| 2 Origin                 | Bruker BioSpin GmbH |
| 3 Solvent                | CDCl3               |
| 4 Temperature            | 298.9               |
| 5 Number of Scans        | 40                  |
| 6 Acquisition Time       | 1.1010              |
| 7 Acquisition Date       | 2022-09-07T21:49:03 |
| 8 Spectrometer Frequency | 125.77              |
| 9 Spectral Width         | 29761.9             |

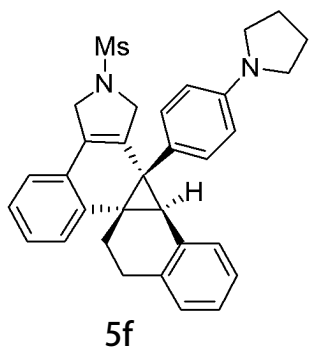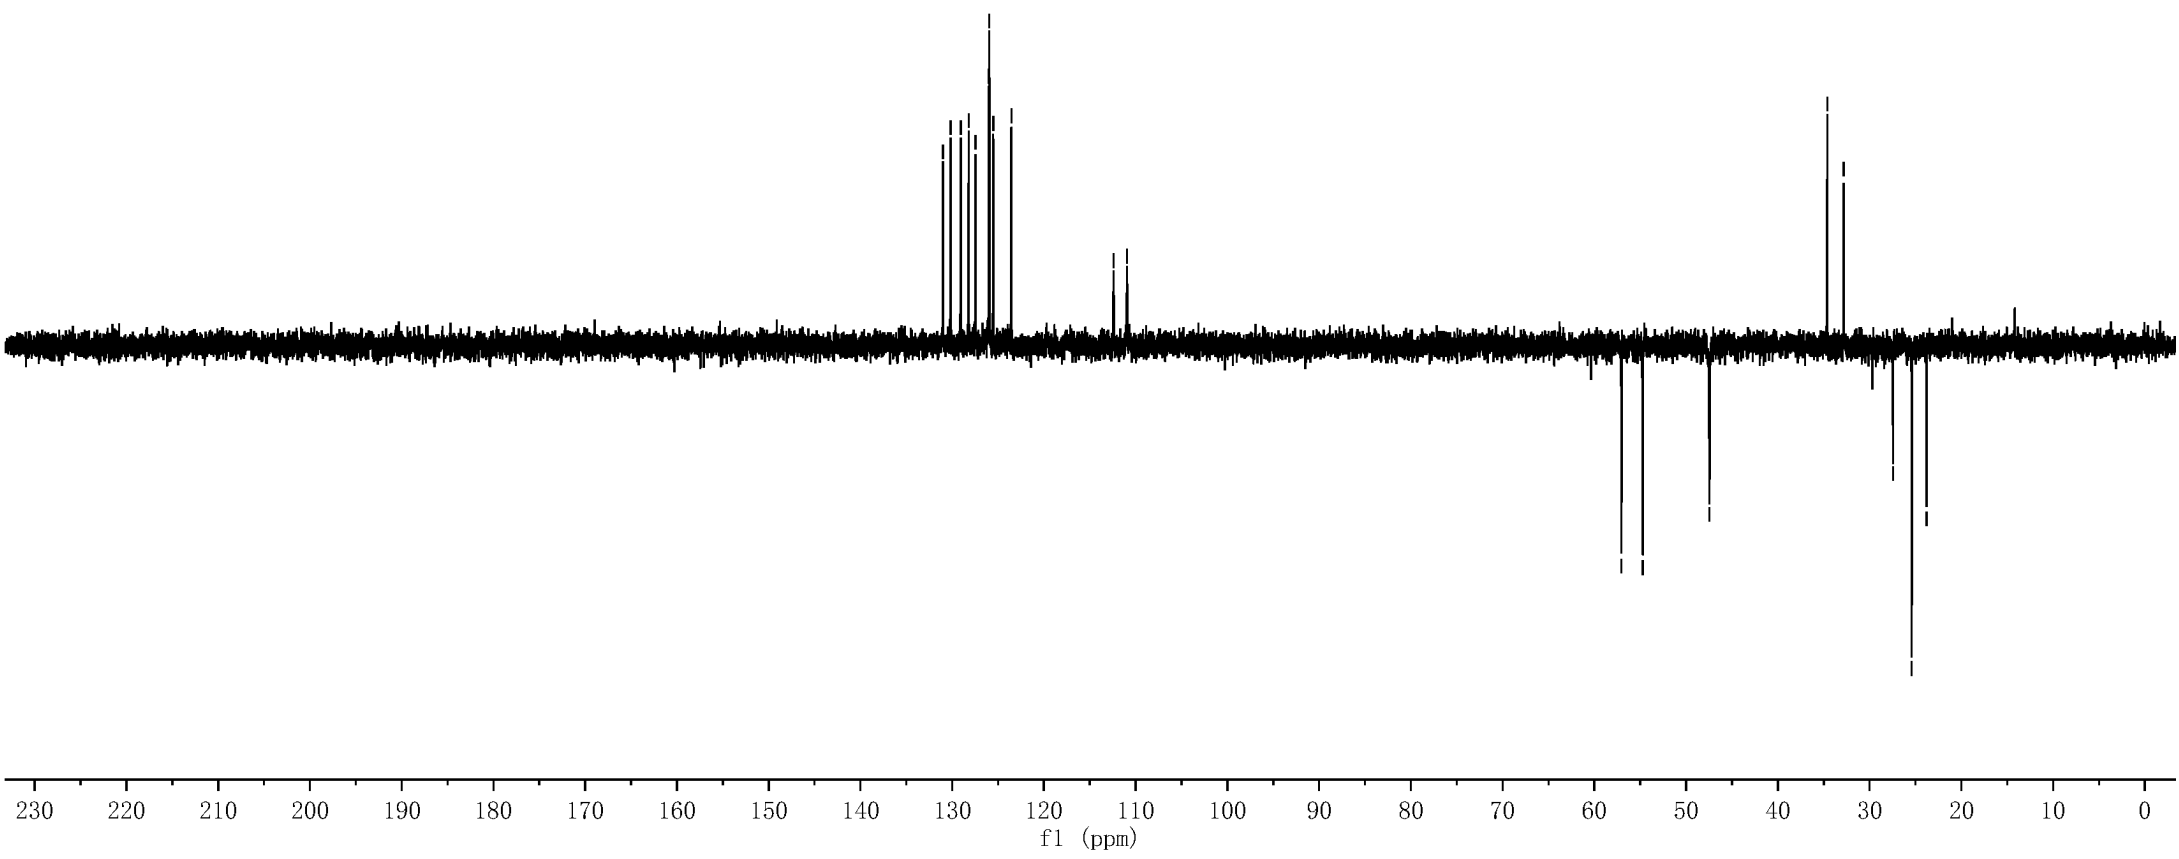

| Parameter                | Value               |
|--------------------------|---------------------|
| 1 Title                  | zyx-6-87            |
| 2 Origin                 | Bruker BioSpin GmbH |
| 3 Solvent                | CDC13               |
| 4 Temperature            | 298.0               |
| 5 Number of Scans        | 7                   |
| 6 Acquisition Time       | 4.0894              |
| 7 Acquisition Date       | 2022-09-04T15:05:19 |
| 8 Spectrometer Frequency | 400.13              |
| 9 Spectral Width         | 8012.8              |

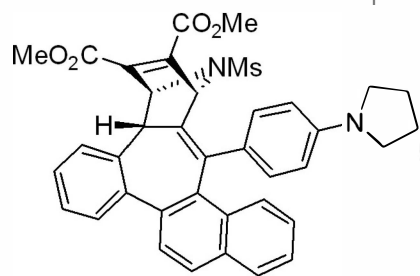

5g

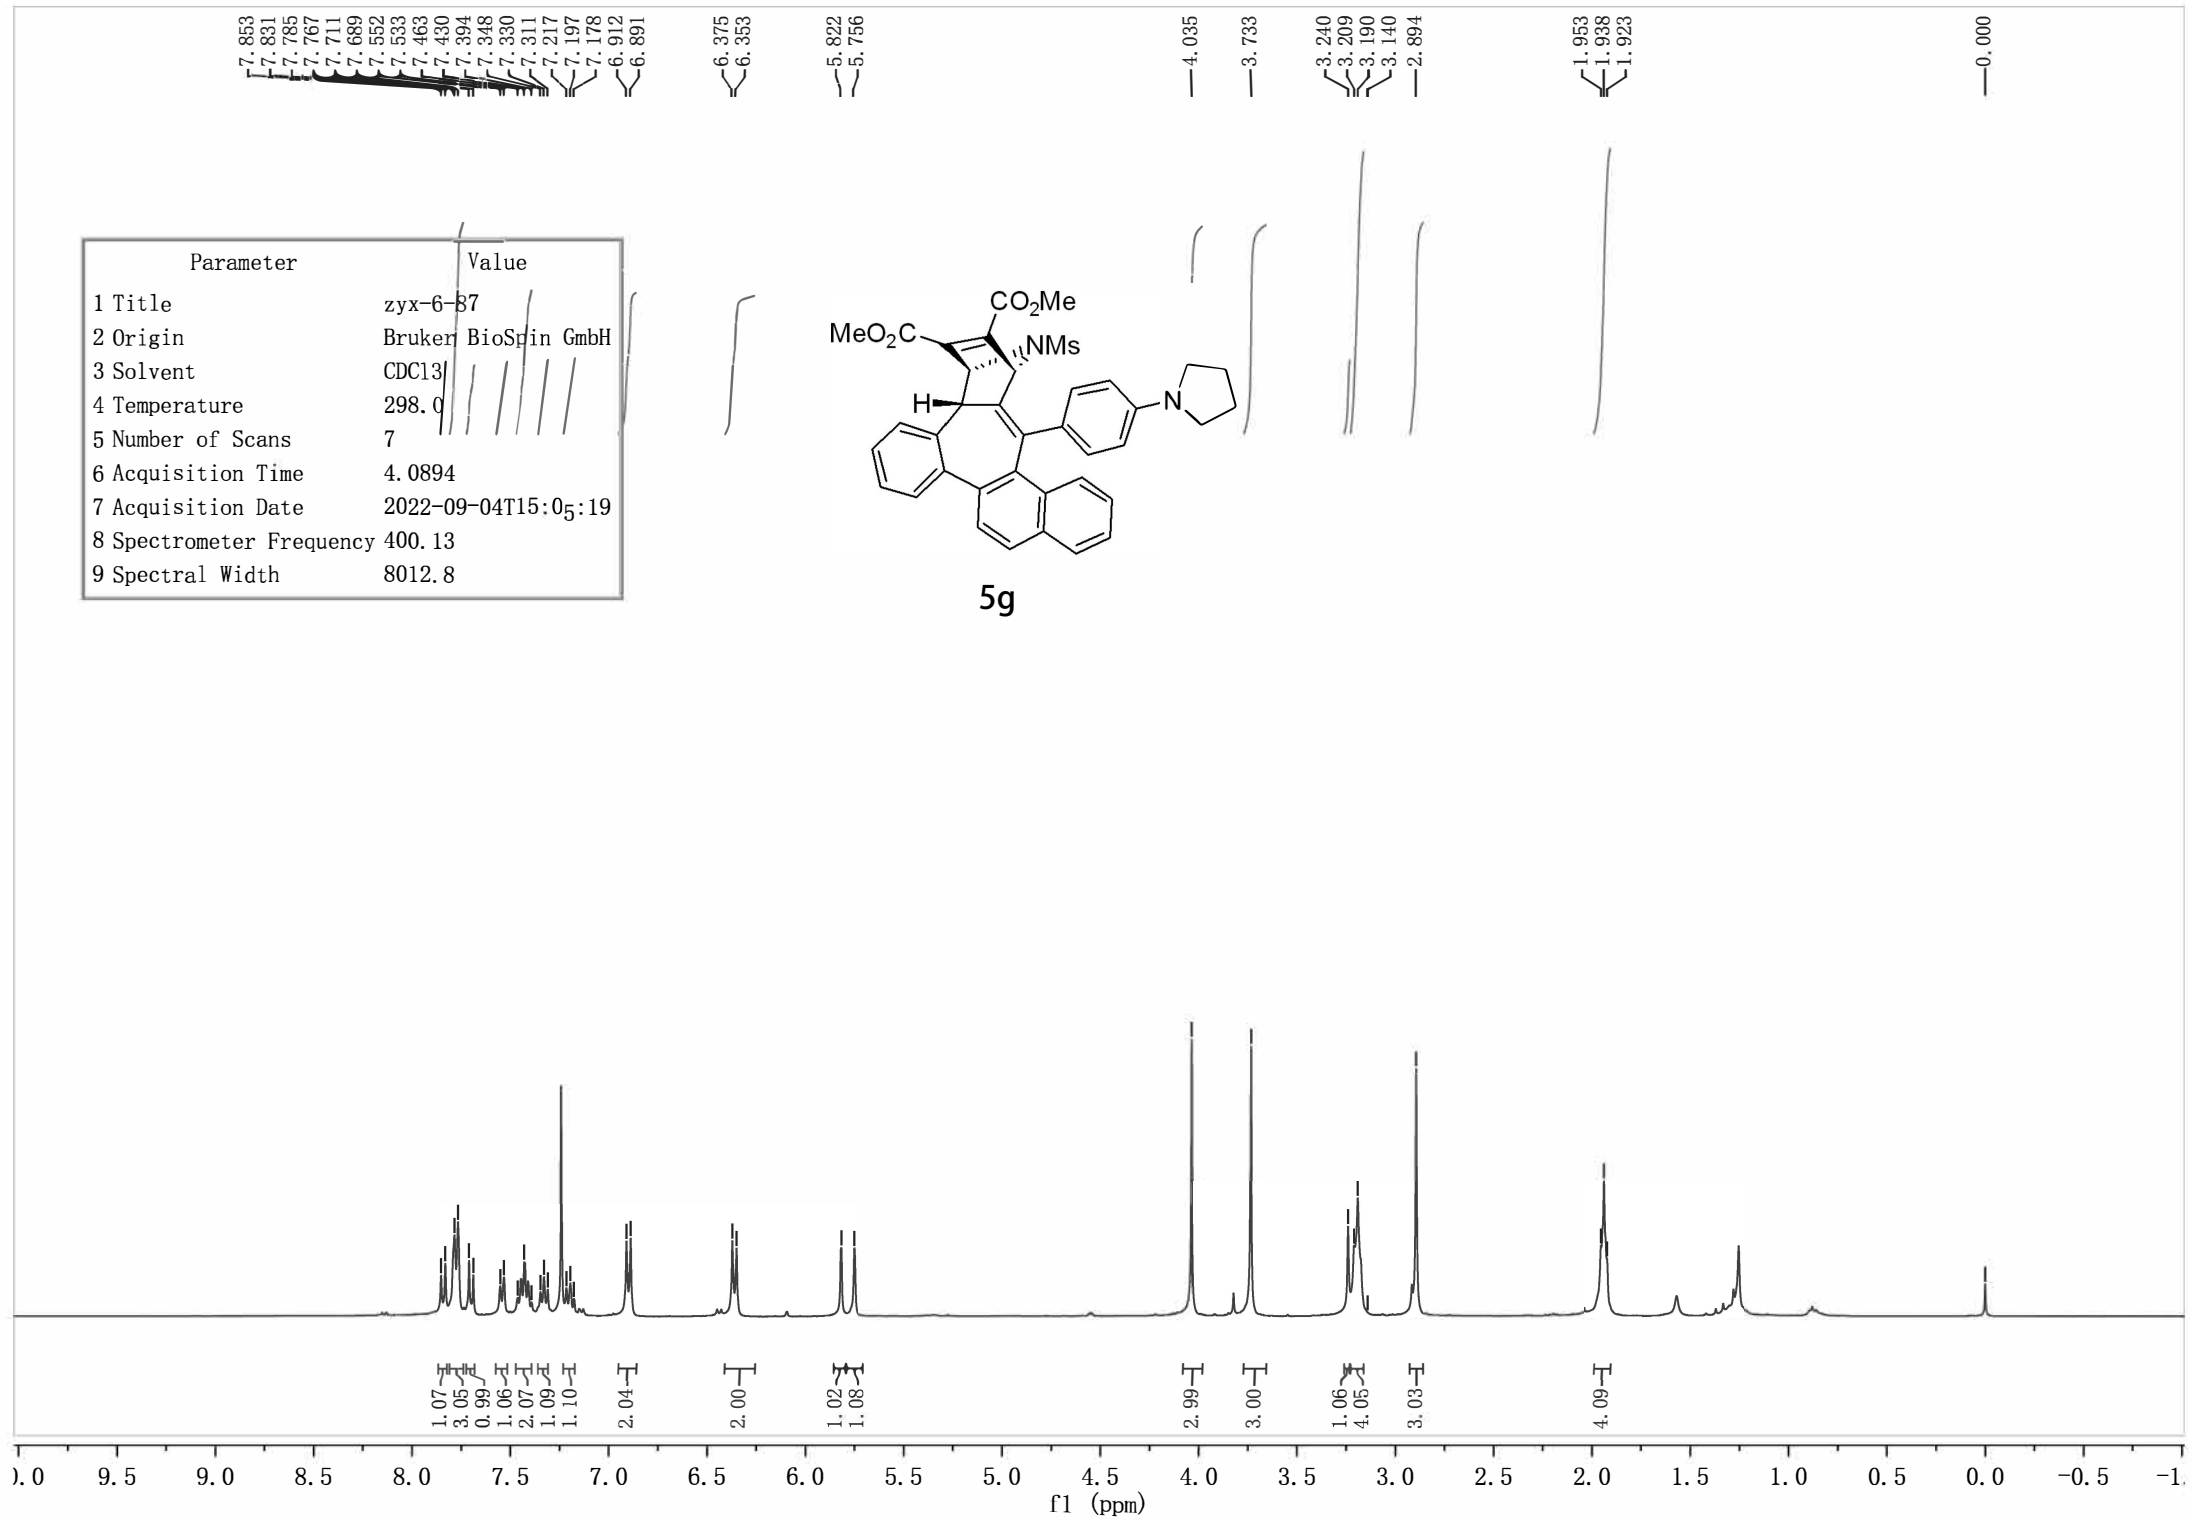

| Parameter                | Value               |
|--------------------------|---------------------|
| 1 Title                  | zyx-6-87---c        |
| 2 Origin                 | Bruker BioSpin GmbH |
| 3 Solvent                | CDCl3               |
| 4 Temperature            | 300.0               |
| 5 Number of Scans        | 162                 |
| 6 Acquisition Time       | 1.3631              |
| 7 Acquisition Date       | 2022-09-04T15:07:01 |
| 8 Spectrometer Frequency | 100.61              |
| 9 Spectral Width         | 24038.5             |

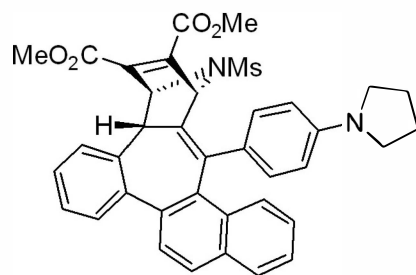

5g

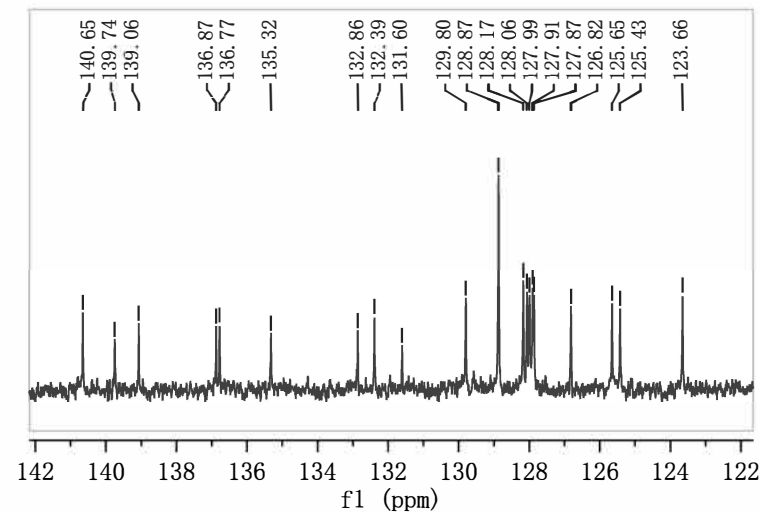

163.69  
162.24

147.37  
146.84  
140.65  
132.39  
129.80  
128.87  
128.17  
128.06  
127.99  
127.91  
127.87  
126.82  
125.65  
125.43  
125.43  
123.66

77.32  
77.00  
76.68

67.16  
65.81

52.96  
52.45

47.44  
45.62

40.82

25.35

220 210 200 190 180 170 160 150 140 130 120 110 100 90 80 70 60 50 40 30 20 10 0

f1 (ppm)



| Parameter                | Value               |
|--------------------------|---------------------|
| 1 Title                  | zyx-6-87--dept      |
| 2 Origin                 | Bruker BioSpin GmbH |
| 3 Solvent                | CDC13               |
| 4 Temperature            | 300.0               |
| 5 Number of Scans        | 42                  |
| 6 Acquisition Time       | 1.2976              |
| 7 Acquisition Date       | 2022-09-04T15:19:20 |
| 8 Spectrometer Frequency | 100.61              |
| 9 Spectral Width         | 25252.5             |

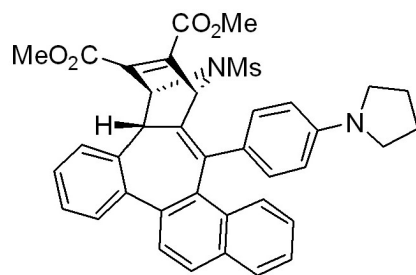

5g

129.80  
128.88  
128.18  
128.07  
128.00  
127.91  
127.87  
126.83  
125.66  
125.43  
123.66  
111.43

67.16  
65.81

52.97  
52.46  
47.45  
45.62  
40.83

25.36

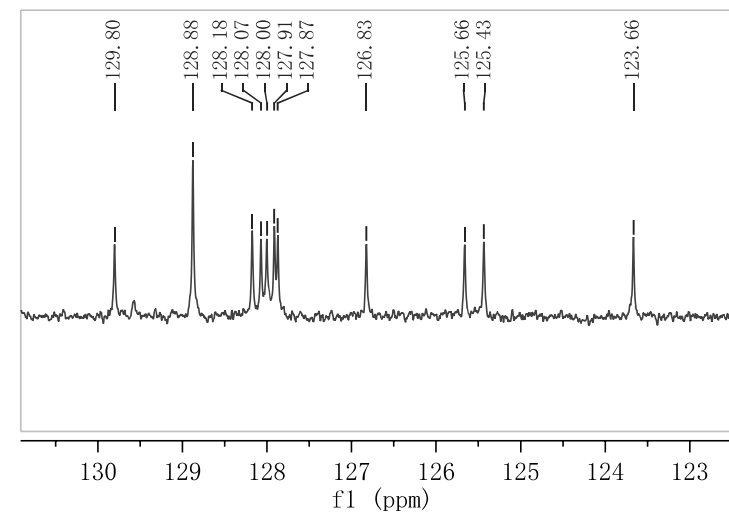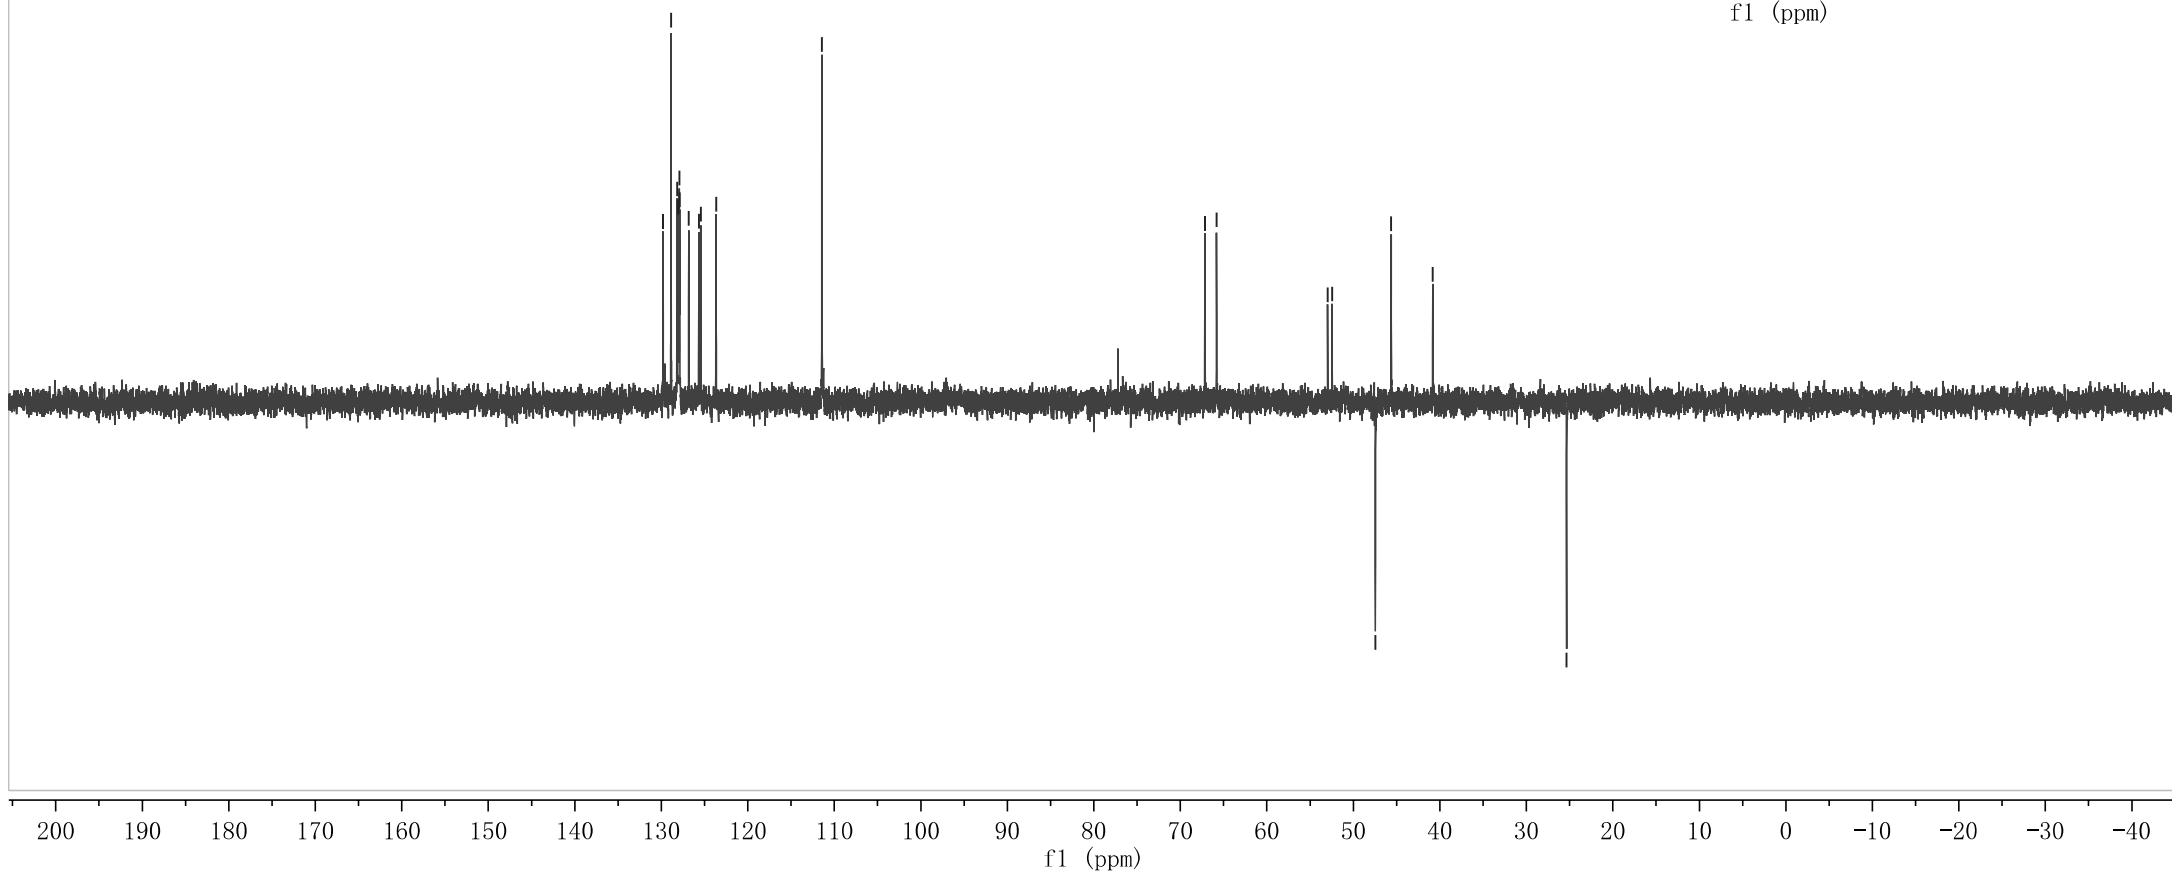

| Parameter                | Value               |
|--------------------------|---------------------|
| 1 Title                  | zyx-10-46-2         |
| 2 Origin                 | Bruker Biospir GmbH |
| 3 Solvent                | CDCl3               |
| 4 Temperature            | 298.0               |
| 5 Number of Scans        | 10                  |
| 6 Acquisition Time       | 4.0894              |
| 7 Acquisition Date       | 2023-07-25T22:37:36 |
| 8 Spectrometer Frequency | 400.13              |
| 9 Spectral Width         | 8012.8              |

7.684  
7.680  
7.666  
7.661  
7.517  
7.514  
7.508  
7.502  
7.496  
7.390  
7.372  
7.356  
7.297  
7.293  
7.278  
7.147  
7.097  
7.092  
6.910  
6.892  
6.793  
6.789  
6.773  
6.769  
6.601  
6.595  
6.354  
6.329  
6.280  
6.256

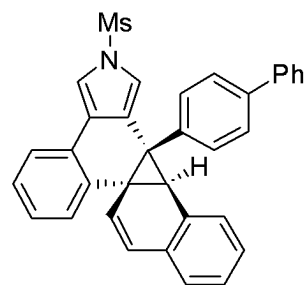

5h

3.138  
2.732  
0.000

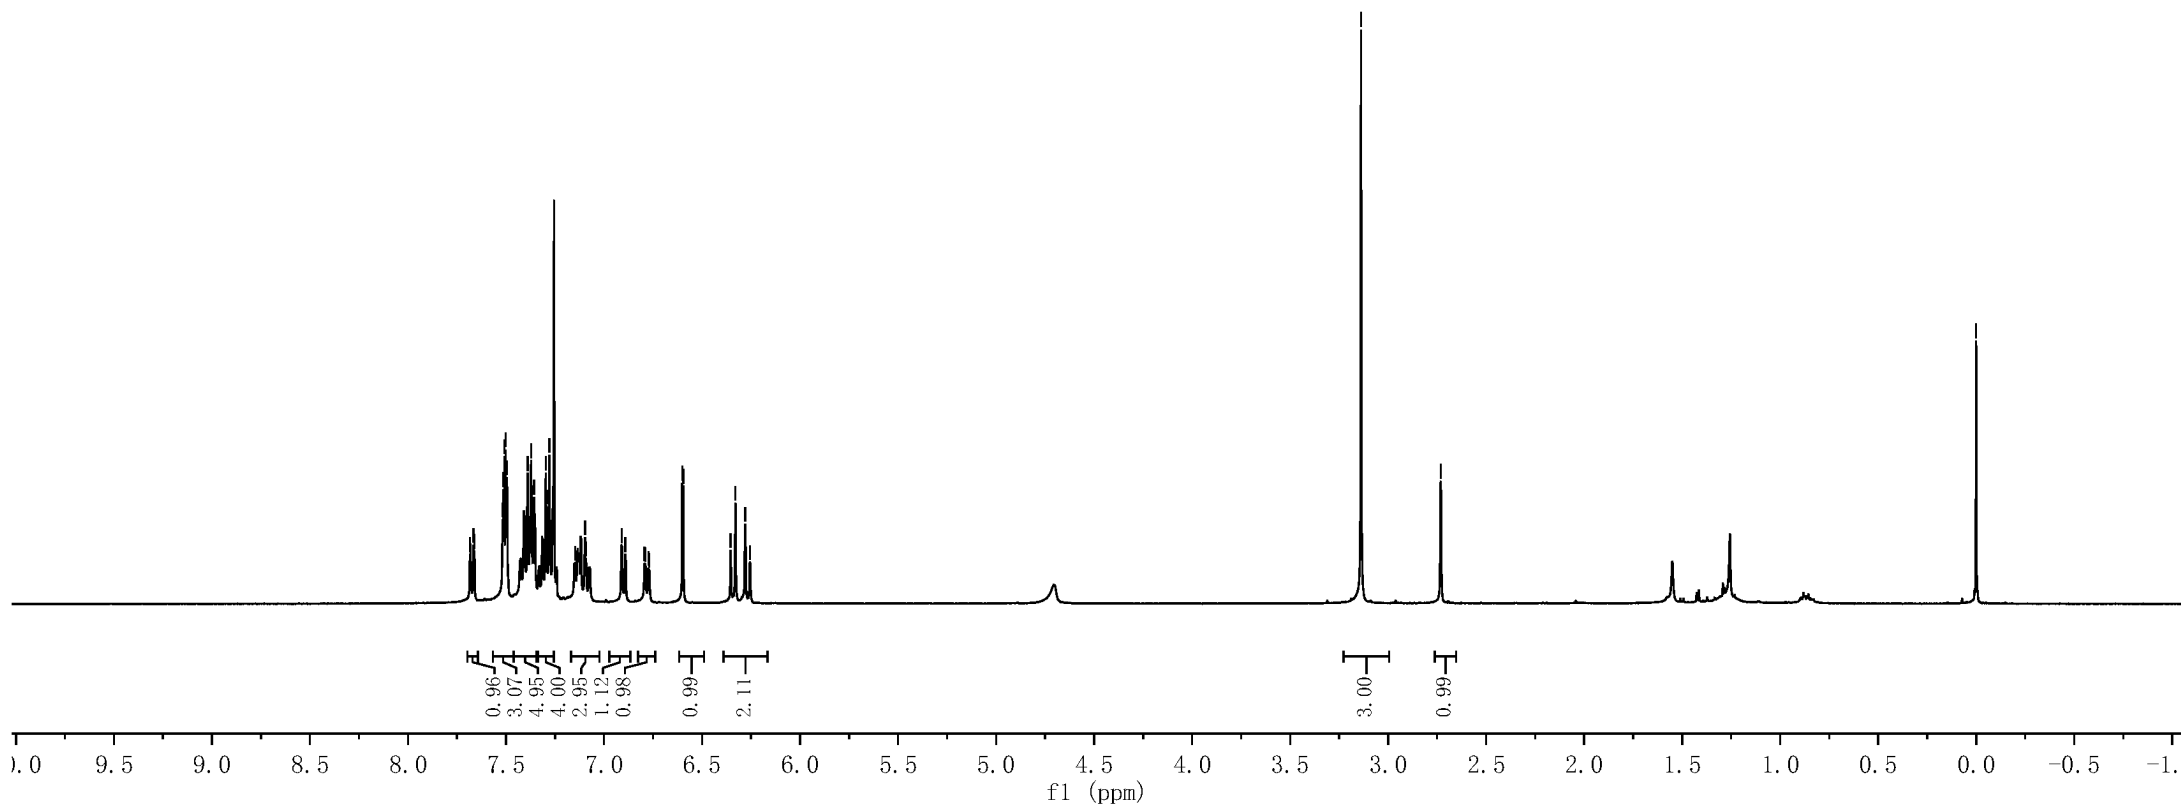

| Parameter                | Value               |
|--------------------------|---------------------|
| 1 Title                  | zyx-10-46-2         |
| 2 Origin                 | Bruker BioSpin GmbH |
| 3 Solvent                | CDCl3               |
| 4 Temperature            | 298.0               |
| 5 Number of Scans        | 10                  |
| 6 Acquisition Time       | 4.0894              |
| 7 Acquisition Date       | 2023-07-25T22:37:36 |
| 8 Spectrometer Frequency | 400.13              |
| 9 Spectral Width         | 8012.8              |

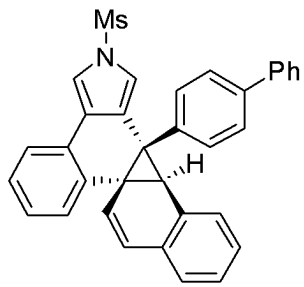

5h

140.64  
138.81  
137.48  
136.29  
133.16  
131.66  
131.13  
131.10  
129.97  
129.94  
129.01  
128.62  
127.80  
127.65  
127.61  
127.45  
127.08  
126.88  
126.77  
126.38  
125.84  
125.41  
125.22  
123.16  
121.62  
118.79  
113.98

77.21  
77.00  
76.79

42.82  
41.21  
37.10

28.18

140.64

138.81

137.48

136.29

133.16

131.66

131.13

131.10

129.97

128.62

127.80

127.65

127.61

127.45

127.08

126.88

126.38

125.84

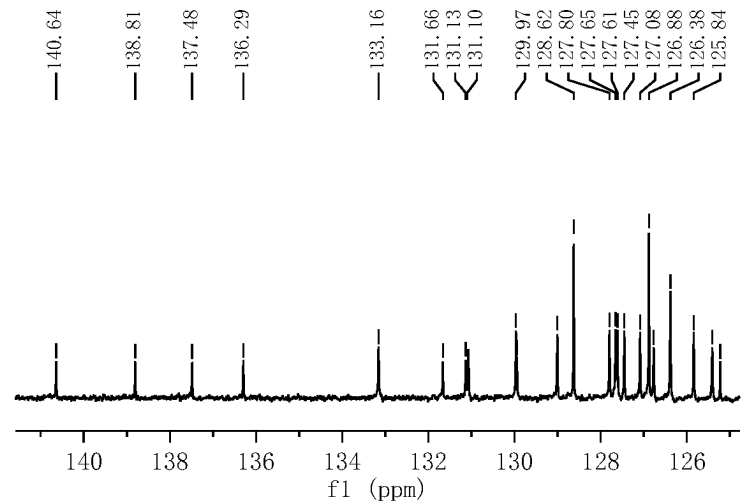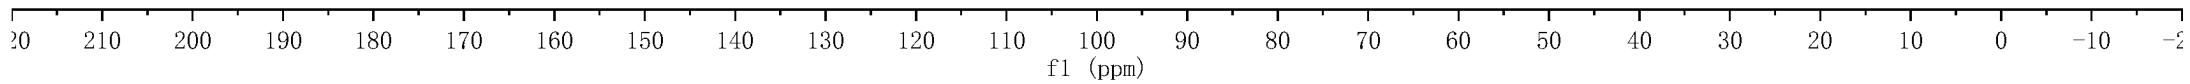

| Parameter                | Value               |
|--------------------------|---------------------|
| 1 Title                  | ZYX-10-42           |
| 2 Origin                 | Bruker BioSpin GmbH |
| 3 Solvent                | CDCl3               |
| 4 Temperature            | 298.0               |
| 5 Number of Scans        | 32                  |
| 6 Acquisition Time       | 0.9044              |
| 7 Acquisition Date       | 2023-07-25T20:51:19 |
| 8 Spectrometer Frequency | 150.92              |
| 9 Spectral Width         | 36231.9             |

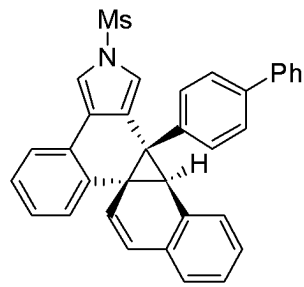

5h

133.15  
131.07  
129.96  
129.00  
128.62  
127.79  
127.65  
127.60  
127.45  
127.08  
126.87  
126.76  
126.38  
125.83  
125.40  
123.16  
118.78  
113.97

42.82  
41.22

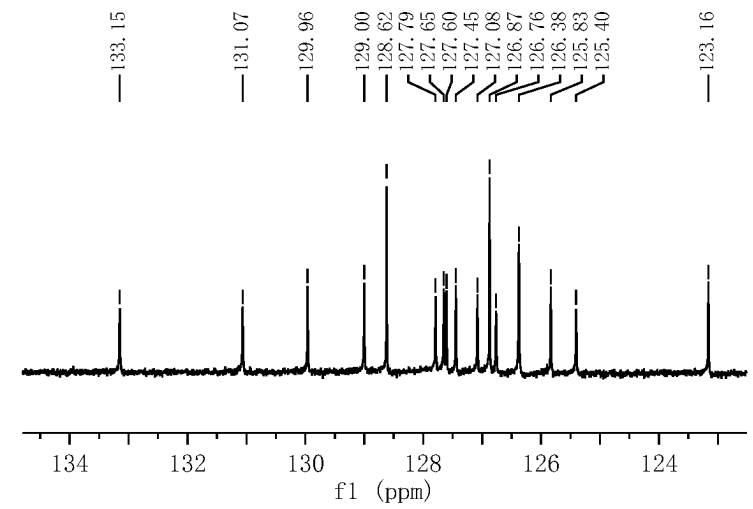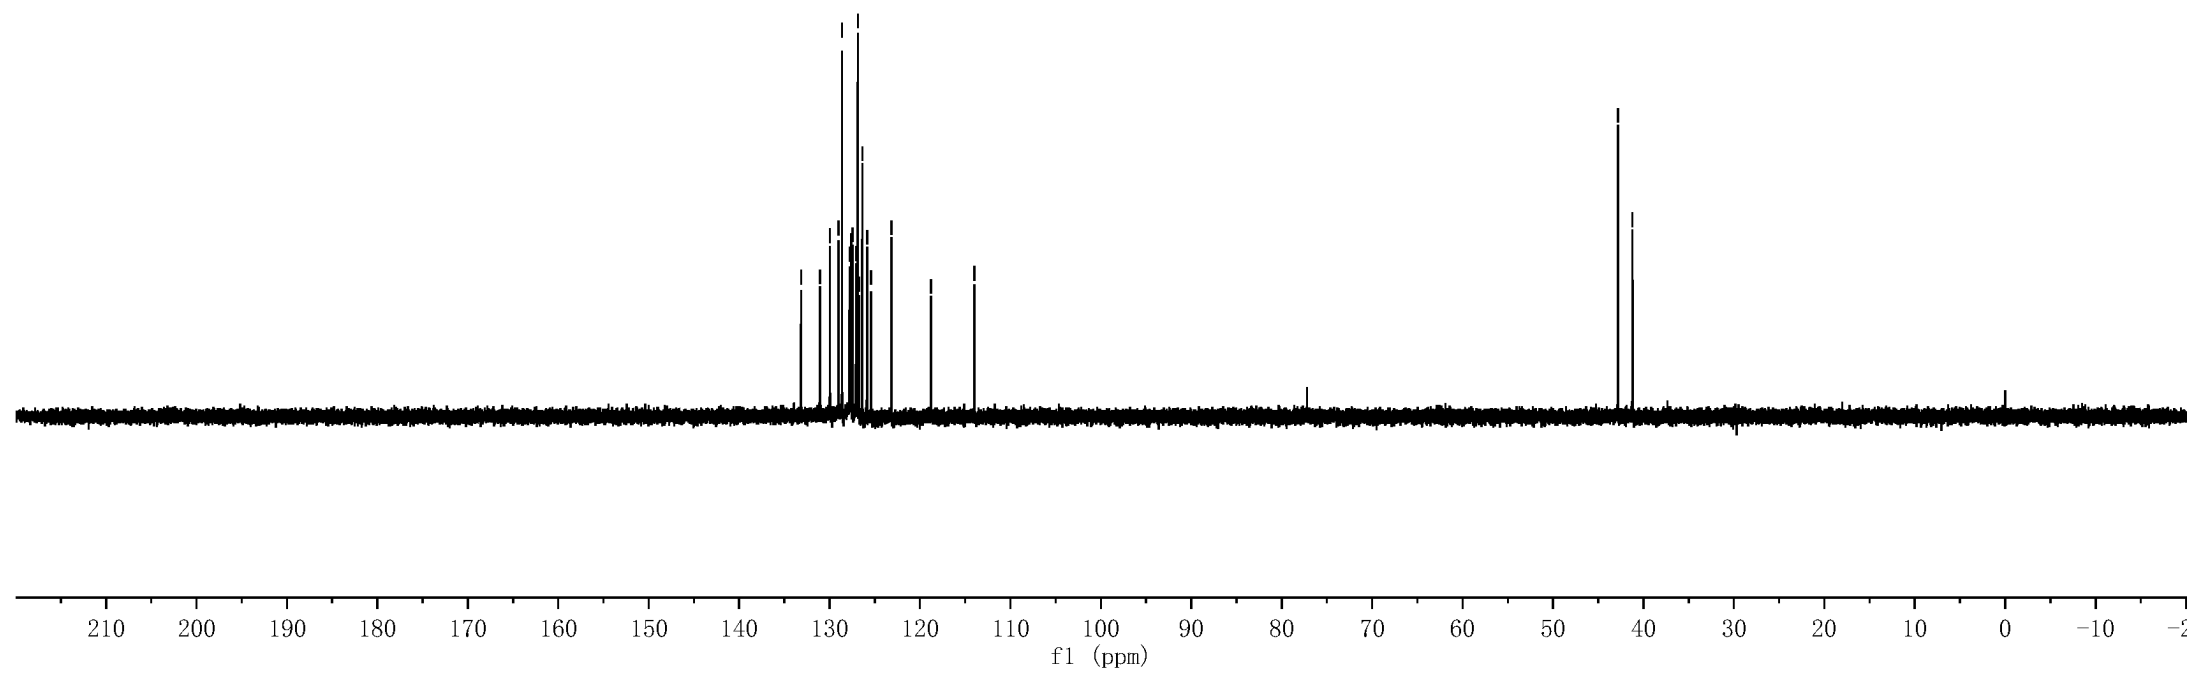

## References:

1. Hong, F.-L. et al. Generation of donor/donor copper carbenes through copper-catalyzed diyne cyclization: enantioselective and divergent synthesis of chiral polycyclic pyrroles. *J. Am. Chem. Soc.* **141**, 16961–16970 (2019).
2. Signaigo, F. K. & Adkins, H. The reactions of hydrogen with derivatives of pyrrole. *J. Am. Chem. Soc.* **58**, 709–716 (1936).
3. Rajasekar, S. & Anbarasan, P. Rhodium-catalyzed transannulation of 1,2,3-triazoles to polysubstituted pyrroles. *J. Org. Chem.* **79**, 8428–8434 (2014).
4. Kerr, W. J., Lindsay, D. M., Owens, P. K., Reid, M., Tuttle, T. & Campos, S. Site-selective deuteration of N-heterocycles via Iridium-catalyzed hydrogen isotope exchange. *ACS Catal.* **7**, 7182–7186 (2017).
5. Zhu, X.-Q. et al. Copper-catalyzed asymmetric cyclization of alkenyl diynes: method development and new mechanistic insights. *Chem. Sci.* **12**, 9466–9474 (2021).
6. Pascalis, L. D., Tekkam, S., Finn, M. G. Azanorbomadienes as thiol-reactive cleavable linkers. *Org. Lett.* **22**, 6248–6251 (2020).
7. Frisch, M. J. et al. *Gaussian 16, Revision B.01, Gaussian, Inc., Wallingford CT, 2016.*
8. Lee, C., Yang, W. & Parr, R. G. Development of the Colle-Salvetti correlation-energy formula into a functional of the electron density. *Phys. Rev. B: Condens. Matter Mater. Phys.* **37**, 785–789 (1988).
9. Becke, A. D. Density-functional thermochemistry. III. The role of exact exchange. *J. Chem. Phys.* **98**, 5648–5632 (1993).
10. Grimme, S., Antony, J., Ehrlich, S. & Krieg, H. A consistent and accurate ab initio parametrization of density functional dispersion correction (DFT-D) for the 94 elements H-Pu. *J. Chem. Phys.* **132**, 154104–154123 (2010).
11. Grimme, S., Ehrlich, S. & Goerigk, L. Effect of the damping function in dispersion corrected density functional theory. *J. Comp. Chem.* **32**, 1456–1465 (2011).
12. Rassolov, V. A., Ratner, M. A., Pople, J. A., Redfern, P. C. & Curtiss, L. A. "6-31G\* basis set for third-row atoms". *J. Comp. Chem.* **22**, 976–984 (2001).
13. Hay, P. J. & Wadt, W. R. Ab initio effective core potentials for molecular calculations. Potentials for the transition metal atoms Sc to Hg. *J. Chem. Phys.* **82**, 270–283 (1985).
14. Cancès, E., Mennucci, B. & Tomasi, J. A new integral equation formalism for the polarizable continuum model: theoretical background and applications to isotropic and anisotropic dielectrics. *J. Chem. Phys.* **107**, 3032–3041 (1997).
15. Mennucci, B., Cancès, E. & Tomasi, J. Evaluation of solvent effects in isotropic and anisotropic dielectrics and in ionic solutions with a unified integral equation method: theoretical bases, computational implementation, and numerical applications. *J. Phys. Chem. B* **101**, 10506–10517 (1997).

16. Adamo, C. & Barone, V. Toward reliable density functional methods without adjustable parameters: the PBE0 model. *J. Chem. Phys.* **110**, 6158 – 6169 (1999).
17. Wachters, A. J. H. Gaussian basis set for molecular wavefunctions containing third-row atoms. *J. Chem. Phys.* **52**, 1033–1036 (1970).
18. Lee, C., Yang, W. & Parr, R. G. Energy-adjusted ab initio pseudopotentials for the first row transition elements. *J. Chem. Phys.* **86**, 866–872 (1987).
19. CYLview20; Legault, C. Y. Université de Sherbrooke, 2020, (<http://www.cylview.org>).
20. Lu, T. & Chen, F. W. A multifunctional wavefunction analyzer. *J. Comput. Chem.* **33**, 580–592 (2012).
21. Lefebvre, C., Rubez, G., Khartabil, H., Boisson, J., Contreras-García, J. & Hénon, E. Accurately extracting the signature of intermolecular interactions present in the NCI plot of the reduced density gradient versus electron density. *Phys. Chem. Chem. Phys.* **19**, 17928–17936 (2017).
22. Lu, T. & Chen, Q. X. Independent gradient model based on Hirshfeld partition: a new method for visual study of interactions in chemical systems. *J. Comput. Chem.* **43**, 539–555 (2022).
23. Martin, R. L.; Hay, P. J.; Pratt, L. R. Hydrolysis of Ferric Ion in Water and Conformational Equilibrium. *J. Phys. Chem. A* **1998**, *102*, 3565–3573.
24. Pracht, P., Bohle, F. & Grimme, S. Automated exploration of the low-energy chemical space with fast quantum chemical methods. *Phys. Chem. Chem. Phys.* **22**, 7169–7192 (2020).
25. Bannwarth, C., Ehlert, S. & Grimme, S. GFN2-xTB—An accurate and broadly parametrized self-consistent tight-binding quantum chemical method with multipole electrostatics and density-dependent dispersion contributions. *J. Chem. Theory Comput.* **15**, 1652–1671 (2019).
